# Supplementary material for: The trypanosome Variant Surface Glycoprotein mRNA is stabilized by an essential unconventional RNA-binding protein
Source: bioRxiv preprint, doi:10.1101/2020.10.08.331769, version 1 (2020-10-08)
Supplement: Supplemental Table 3 [file 331769_file05.xlsx]

## Sheet: Legend and metadata
RNASeq analysis of trypanosomes with and without RNAi targeting CFB2 - Alignment to Lister 427 genome
RNAi was induced for 9 hours with 100 ng/ml tetracycline. Total RNA was prepared from cells with (samples 13 and 14) and without (samples 11 and 12) tetracycline, and from cells with no RNAi construct (P1 and P2). rRNNA was depleted using oligonucelotides and RNaseH. RNA was then fragmented and subjected to Illumina RNASeq. The unpaired reads were then aligned to the Lister427_2018 genome. Each r…
geneID: The gene ID from the 427_2018 genome assembly. Some genes are fragmented so there is more than one fragment (CDS1, CDS2). These may be either pseudogenes or read errors.
GeneID no extension: the extension =p1-cds1/2/3 removed
Location: chromsomal location of the gene
927 paralogue example: Paralogiues from TREU927 were downloaded from TritrypDB (see column "All 927 paralogues") and one example was taken.
927 paralogue annotation: Annotation from TritrypDB with manual additions and corrections. The annotation "putative" has been removed throughout.
927 category: A single gene product category was manually assigned.
427_2018 annotation" Automated annotation from the 427_2018 genome assembly. The CFB genes ahve been manually annotated.
baseMean: base mean value from DeSeq2
log2FoldChange: log2 of the difference obtained using DeSeq2 after comparing the +tet samples with the remaining samples.
padj: likelihood of the null hypothesis (no difference) obtained using DeSeq2 after comparing the +tet samples with the remaining samples.
DOWN/UP 1.5x padj<0.05" This designates samples that have at least 1.5-fold difference between +tetracycline (RNAi induced) and the remainder. 4= >2x down; 3= >1.5x down; 2= >1.5x up; 1= >2x up
To calculate the ploidy of each gene, we also allowed each read from one -tet sample to align twenty times. The ploidy was obtained by dividing this value by the result obtained when each read was allowed to align only once. We do not understand why = as for most ESAG5 genes - some values that exceed 20 were obtained. CFB2 has an apparent poloidy of greeater than 1 because some CFB2 reads also al…
METADATA	Compressed file	Length before trim	total reads after trim	Aligned to 427_2018	%mapping	No reads on coding sequences 427_2018	Align 1x to TREU927	Align >1x to TREU927
Parental_1	12.37	85	53716832	52197992	97.17	34382663	31273440	17758087
Parental_2	12.78	85	54471100	52473475	96.33	27848330	24574044	25167613
-tetracycline 11	18.58	85	78439955	76151447	97.08	35421421	30223552	42217703
-tetracycline 12	36.94	85	94661178	90307822	95.4	8805590	5249167	84131825
+tetracycline 13	28.05	85	74087615	70696168	95.42	7759457	5153252	64945939
+tetracycline 14	25.69	85	65928920	62672555	95.06	7027273	3799971	57608577

## Sheet: Data and analysis
geneID	GeneID no extension	Location	927 paralogue example	927 paralogue annotation	927 category	427_2018 annotation	baseMean +tet vs all	log2FoldChange +tet vs all	padj +tet vs all	DOWN/UP 1.5x padj<0.05	RPM +tet/-tet	read ploidy 427	readcount_-tet_12 20x align	readcount_P1	readcount_P2	readcount_-tet_11	readcount_-tet_12	readcount_+tet_13	readcount_+tet_14	RPM P1	RPM P2	RPM -tet_11	RPM -tet_12	RPM_+tet 13	RPM_+tet 14	All 927 paralogues	minus	plus
Tb427_080022300.1-p1-CDS1	Tb427_080022300.1	Chr8_core_Tb427v10	Tb927.8.1945	hypothetical protein; start of transcription unit	ZUnknown	hypothetical protein, conserved	485	-1.0183	1.87e-11	4	0.42	1	222	1709	1372	1464	222	111	97	49.71	49.27	41.33	25.21	14.31	13.8	Tb927.8.1945	6.05615	4.81301
Tb427_010031000.1-p1-CDS1	Tb427_010031000.1	Chr1_core_Tb427v10	Tb927.1.4650	cyclin-like F-box protein (CFB2)	Ubiquitin.proteasome	CFB2	3446	-2.1686	2.77e-118	4	0.19	1.65	3568	12649	9990	10819	2158	375	381	367.89	358.73	305.44	245.07	48.33	54.22	Tb11.v5.0705,Tb927.1.4540,Tb927.1.4560,Tb927.1.4580,Tb927.1.4600,Tb927.1.4630,Tb927.1.4650	9.10462	6.68018		0.994184
Tb427_000016000.1-p1-CDS1	Tb427_000016000.1	BES1_Tb427v10	Tb10.v4.0077	VSG pseudogene	VSG	VSG2	695005	-1.2729	8.81e-38	4	0.32	1	445629	1961166	1745536	2284563	445097	147269	128779	57039.4	62680.1	64496.7	50547.1	18979.3	18325.6	Tb10.v4.0077,Tb10.v4.0121,Tb10.v4.0163,Tb10.v4.0186,Tb10.v4.0192,Tb11.v5.0362,Tb11.v5.0459,Tb11.v5.0460,Tb11.v5.0918,Tb927.11.100,Tb927.11.19620,Tb927.11.19920,Tb927.11.20040,Tb927.5.4980,Tb927.6.5280,Tb927.6.5370,Tb927.6.5660,Tb927.9.160,Tb927.9.16350,Tb927.9.16560,Tb927.9.17130,Tb927.9.17440,Tb927.9.17480,Tb927.9.17590,Tb927.9.420	16.8118	15.1871
Tb427_070071700.1-p1-CDS1	Tb427_070071700.1	Chr7_core_Tb427v10	Tb927.7.6570	Enriched in surface-labeled proteome protein 17 (ESP17)	ZUnknown	hypothetical protein, conserved	644	1.5885	6.17e-35	3	2.93	1.12	184	767	638	1015	165	551	477	22.31	22.91	28.65	18.74	71.01	67.88	Tb927.7.6570	5.56651	7.1178
Tb427_070072000.1-p1-CDS1	Tb427_070072000.1	Chr7_core_Tb427v10	Tb927.7.6600	hypothetical protein, conserved	ZUnknown	hypothetical protein, conserved	1184	1.2935	5.6e-16	3	2.46	1	404	1265	1287	1870	403	989	811	36.79	46.21	52.79	45.77	127.46	115.41	#N/A	6.62293	7.92404
Tb427_070070700.1-p1-CDS1	Tb427_070070700.1	Chr7_core_Tb427v10	Tb927.7.6490	hypothetical protein, conserved	ZUnknown	hypothetical protein, conserved	1352	1.1858	1.45e-14	3	2.17	1	490	1679	1508	2323	490	1077	877	48.83	54.15	65.58	55.65	138.8	124.8	Tb927.7.6490	6.9216	8.04221
Tb427_030014700.1-p1-CDS1	Tb427_030014700.1	Chr3_core_Tb427v10	Tb927.3.1500	variant surface glycoprotein (VSG)-related	VSG	Trypanosomal VSG domain containing protein	1952	1.4196	1.69e-18	3	2.69	1	564	1965	1713	3287	564	1707	1421	57.15	61.51	92.8	64.05	219.99	202.21	Tb927.3.1500,Tb927.3.1510	7.29324	8.72178
Tb427_100028400.1-p1-CDS1	Tb427_100028400.1	Chr10_core_Tb427v10	Tb927.10.2410	MSP-C	Membrane.protein	Leishmanolysin	2864	1.009	2.4e-20	3	1.86	1	1081	4916	3963	5151	1081	2083	1611	142.98	142.31	145.42	122.76	268.45	229.25	Tb927.10.2410	8.06706	8.95913
Tb427_070075300.1-p1-CDS1	Tb427_070075300.1	Chr7_core_Tb427v10	Tb11.v5.0826	ESAG5	ESAG	hypothetical protein, conserved	4750	1.2005	4.87e-21	3	2.08	7.51	11241	6805	5580	9299	1496	3650	3027	197.92	200.37	262.52	169.89	470.39	430.75	Tb11.v5.0826,Tb927.7.6860	8.75626	9.81561
Tb427_070005400.1-p1-CDS1	Tb427_070005400.1	Chr7_core_Tb427v10	Tb927.7.180	Trypanosomal VSG domain containing protein	ZUnknown	Trypanosomal VSG domain containing protein	5519	1.2882	5.64e-22	3	2.29	1	1586	7059	6643	10433	1586	4520	3552	205.31	238.54	294.54	180.11	582.51	505.46	Tb927.7.180	8.89072	10.0874
Tb427_110087200.1-p1-CDS1	Tb427_110087200.1	Chr11_core_Tb427v10	Tb11.v5.0826	ESAG5	ESAG	hypothetical protein, conserved	8893	1.2431	1.82e-40	3	2.16	3.75	10112	14954	10882	16358	2699	6854	5482	434.93	390.76	461.81	306.51	883.31	780.1	Tb11.v5.0826,Tb927.7.6860	9.58556	10.6999
Tb427_050020600.1-p1-CDS3	Tb427_050020600.1	Chr5_core_Tb427v10	Tb927.5.1480	hypothetical protein	ZUnknown	hypothetical protein, conserved	133	-0.6161	0.0125	2	0.48	1	38	560	376	435	38	32	27	16.29	13.5	12.28	4.32	4.12	3.84	Tb927.5.1480	4.05311	2.99277
Tb427_000271300.1-p1-CDS4	Tb427_000271300.1	Chr1_5A_Tb427v10	Tb05.5K5.350	ESAG3 pseudogene	ESAG.pseudo	hypothetical protein, conserved	199	-0.6018	0.00341	2	0.57	8.34	726	670	503	581	87	48	61	19.49	18.06	16.4	9.88	6.19	8.68	Tb05.5K5.350,Tb05.5K5.420,Tb05.5K5.500,Tb08.27P2.160,Tb08.27P2.250,Tb08.27P2.330,Tb08.27P2.400,Tb08.27P2.520,Tb09.v4.0024,Tb09.v4.0027,Tb09.v4.0033,Tb09.v4.0045,Tb09.v4.0062,Tb09.v4.0083,Tb09.v4.0100,Tb09.v4.0115,Tb09.v4.0130,Tb09.v4.0132,Tb09.v4.0154,Tb09.v4.0160,Tb09.v4.0172,Tb09.v4.0181,Tb09.v4.0201,Tb09.v4.0206,Tb10.v4.0057,Tb10.v4.0066,Tb10.v4.0074,Tb10.v4.0090,Tb10.v4.0101,Tb10.v4.0137,Tb10…	4.71589	3.89433
Tb427_000321800.1-p1-CDS2	Tb427_000321800.1	Chr4_3A_Tb427v10	Tb10.v4.0156	VSG pseudogene	VSG	hypothetical protein, conserved	274	-0.7507	0.000373	2	0.14	186	15996	1069	832	1297	86	22	27	31.09	29.88	36.62	9.77	2.84	3.84	Tb10.v4.0156,Tb10.v4.0168,Tb10.v4.0208,Tb11.v5.0417,Tb11.v5.0911,Tb927.11.19520,Tb927.11.20100,Tb927.3.140,Tb927.9.130,Tb927.9.17200,Tb927.9.17870	5.53574	2.73985
Tb427_100119800.1-p1-CDS1	Tb427_100119800.1	Chr10_core_Tb427v10	Tb927.10.11270	RBP23	RNA.binding	RNA recognition motif. (a.k.a. RRM, RBD, or RNP domain)	420	-0.6209	6.6e-05	2	0.59	1	212	1324	1053	1116	212	116	124	38.51	37.81	31.51	24.08	14.95	17.65	Tb927.10.11270	5.79675	5.0268
Tb427_080056500.1-p1-CDS1	Tb427_080056500.1	Chr8_core_Tb427v10	Tb927.8.5120	cytochrome c	Mito.e.transport	Cytochrome c	564	-0.6642	4.81e-05	2	0.55	1	237	1756	1494	1745	237	151	160	51.07	53.65	49.26	26.91	19.46	22.77	Tb927.8.5120	6.25115	5.4002
Tb427_100040000.1-p1-CDS1	Tb427_100040000.1	Chr10_core_Tb427v10	Tb927.10.3540	hypothetical protein, conserved	ZUnknown	hypothetical protein, conserved	705	-0.6295	8.64e-07	2	0.59	1	330	2275	1672	2030	330	216	195	66.17	60.04	57.31	37.48	27.84	27.75	Tb927.10.3540	6.56666	5.79675
Tb427_040040300.1-p1-CDS1	Tb427_040040300.1	Chr4_core_Tb427v10	Tb10.v4.0130	hypothetical protein	ZUnknown	hypothetical protein, conserved	604	-0.6133	0.000332	2	0.48	20.58	6278	1706	1240	2156	305	186	157	49.62	44.53	60.87	34.64	23.97	22.34	Tb10.v4.0130,Tb11.1740,Tb11.1750,Tb11.1751,Tb11.1760,Tb11.1770,Tb11.v5.0607,Tb11.v5.0658	6.57758	5.53325
Tb427_110031800.1-p1-CDS1	Tb427_110031800.1	Chr11_core_Tb427v10	Tb927.11.2690	succinyl-coA:3-ketoacid-coenzyme A transferase, mitochondrial precursor	Mito.citric.acid.cycle	Coenzyme A transferase	1691	-0.7602	1.15e-05	2	0.57	1	781	6568	4600	3968	781	477	373	191.03	165.18	112.02	88.69	61.47	53.08	Tb927.11.2690	7.64897	6.83983
Tb427_000008700.1-p1-CDS1	Tb427_000008700.1	BES13_Tb427v10	Tb11.v5.0826	ESAG5	ESAG	hypothetical protein, conserved	89	0.7417	0.000667	1	1.8	306.83	9205	155	97	190	30	54	62	4.51	3.48	5.36	3.41	6.96	8.82	Tb11.v5.0826,Tb927.7.6860	3.13258	3.98003
Tb427_000020000.1-p1-CDS1	Tb427_000020000.1	BES3_Tb427v10	Tb927.1.4900	ESAG11	ESAG	hypothetical protein, conserved	96	0.6095	0.0141	1	1.64	32.2	1288	86	125	211	40	65	62	2.5	4.49	5.96	4.54	8.38	8.82	Tb927.1.4900,Tb927.1.5110,Tb927.3.5820	3.39232	4.10434
Tb427_000006300.1-p1-CDS1	Tb427_000006300.1	BES11_Tb427v10	Tb05.5K5.350	ESAG3 pseudogene	ESAG.pseudo	hypothetical protein, conserved	166	0.6709	0.000985	1	1.68	12.32	887	276	287	275	72	109	89	8.03	10.31	7.76	8.18	14.05	12.66	Tb05.5K5.350,Tb05.5K5.420,Tb05.5K5.500,Tb08.27P2.160,Tb08.27P2.250,Tb08.27P2.330,Tb08.27P2.400,Tb08.27P2.520,Tb09.v4.0024,Tb09.v4.0027,Tb09.v4.0033,Tb09.v4.0045,Tb09.v4.0062,Tb09.v4.0083,Tb09.v4.0100,Tb09.v4.0115,Tb09.v4.0130,Tb09.v4.0132,Tb09.v4.0154,Tb09.v4.0160,Tb09.v4.0172,Tb09.v4.0181,Tb09.v4.0201,Tb09.v4.0206,Tb10.v4.0057,Tb10.v4.0066,Tb10.v4.0074,Tb10.v4.0090,Tb10.v4.0101,Tb10.v4.0137,Tb10…	3.99458	4.73931
Tb427_000019400.1-p1-CDS1	Tb427_000019400.1	BES3_Tb427v10	Tb11.v5.0826	ESAG5	ESAG	hypothetical protein, conserved	164	0.6849	0.000208	1	1.61	182.6	10591	349	226	345	58	108	87	10.15	8.12	9.74	6.59	13.92	12.38	Tb11.v5.0826,Tb927.7.6860	4.02945	4.71699
Tb427_000009800.1-p1-CDS1	Tb427_000009800.1	BES14_Tb427v10	Tb11.v5.0826	ESAG5	ESAG	hypothetical protein, conserved	198	0.6461	0.0014	1	1.5	131.78	10015	301	328	439	76	116	117	8.75	11.78	12.39	8.63	14.95	16.65	Tb11.v5.0826,Tb927.7.6860	4.39369	4.98185
Tb427_000011300.1-p1-CDS1	Tb427_000011300.1	BES15_Tb427v10	Tb11.v5.0826	ESAG5	ESAG	hypothetical protein, conserved	292	0.8652	1.38e-07	1	1.87	125.49	10039	496	448	641	80	185	189	14.43	16.09	18.1	9.09	23.84	26.9	Tb11.v5.0826,Tb927.7.6860	4.765	5.66505
Tb427_070071500.1-p1-CDS1	Tb427_070071500.1	Chr7_core_Tb427v10	Tb927.7.6550	hypothetical protein, conserved	ZUnknown	hypothetical protein, conserved	271	0.6361	0.000294	1	1.43	1.06	128	477	431	545	121	160	147	13.87	15.48	15.39	13.74	20.62	20.92	Tb927.7.6550	4.86443	5.37643
Tb427_000005700.1-p1-CDS1	Tb427_000005700.1	BES10_Tb427v10	Tb11.v5.0826	ESAG5	ESAG	hypothetical protein, conserved	296	0.7241	0.000413	1	1.58	83.55	10109	372	447	635	121	187	182	10.82	16.05	17.93	13.74	24.1	25.9	Tb11.v5.0826,Tb927.7.6860	4.98504	5.64386
Tb427_000021700.1-p1-CDS1	Tb427_000021700.1	BES4_Tb427v10	Tb927.1.5120	ESAG1	ESAG	ESAG protein	402	0.7013	1.52e-06	1	1.55	19.72	2721	733	684	897	138	243	225	21.32	24.56	25.32	15.67	31.32	32.02	Tb927.1.5120	5.3572	5.98504
Tb427_000481500.1-p1-CDS1	Tb427_000481500.1	Chr7_5A_Tb427v10	Tb09.v4.0151	hypothetical protein	ZUnknown	hypothetical protein, conserved	461	0.6218	1.25e-06	1	1.51	2.51	449	975	819	901	179	279	232	28.36	29.41	25.44	20.33	35.96	33.01	Tb09.v4.0151,Tb10.v4.0217,Tb11.v5.0984,Tb927.11.17850,Tb927.3.5760,Tb927.5.150,Tb927.9.720,Tb927.9.730,Tb927.9.7340	5.51633	6.1079
Tb427_070071600.1-p1-CDS1	Tb427_070071600.1	Chr7_core_Tb427v10	Tb927.7.6560	hypothetical protein, conserved	ZUnknown	hypothetical protein, conserved	450	0.7798	2.59e-05	1	1.58	1	200	647	598	895	200	316	247	18.82	21.47	25.27	22.71	40.72	35.15	#N/A	5.58436	6.24546
Tb427_060016800.1-p1-CDS1	Tb427_060016800.1	Chr6_core_Tb427v10	Tb11.v5.0699	Trypanosomal VSG domain containing protein	ZUnknown	Trypanosomal VSG domain containing protein	517	0.6974	2.01e-09	1	1.57	1	176	1119	840	1094	176	317	275	32.55	30.16	30.89	19.99	40.85	39.13	Tb11.v5.0699,Tb927.6.1330,Tb927.6.1370,Tb927.6.1390	5.66903	6.32157
Tb427_030023300.1-p1-CDS1	Tb427_030023300.1	Chr3_core_Tb427v10	Tb927.3.2360	hypothetical protein, conserved	ZUnknown	hypothetical protein, conserved	688	0.7471	8.01e-13	1	1.56	1	251	1355	1125	1438	251	430	367	39.41	40.4	40.6	28.5	55.42	52.23	Tb927.3.2360	6.11061	6.7502
Tb427_110058000.1-p1-CDS1	Tb427_110058000.1	Chr11_core_Tb427v10	Tb927.11.5290	mitochondrial carrier protein, MCP9	Mito.transport	Mitochondrial carrier protein	653	0.7664	1.87e-05	1	1.55	1	211	1005	917	1651	211	431	378	29.23	32.93	46.61	23.96	55.55	53.79	Tb927.11.5290,Tb927.8.5810	6.14098	6.77268
Tb427_030005700.1-p1-CDS1	Tb427_030005700.1	Chr3_core_Tb427v10	Tb927.3.600	hypothetical protein	ZUnknown	hypothetical protein, conserved	785	0.833	1.71e-14	1	1.67	1	271	1606	1157	1608	271	533	414	46.71	41.55	45.4	30.78	68.69	58.91	Tb927.3.600	6.25134	6.99548
Tb427_110093600.1-p1-CDS1	Tb427_110093600.1	Chr11_core_Tb427v10	Tb927.11.7490	Protein of unknown function (DUF423)	ZUnknown	Protein of unknown function (DUF423)	905	0.6142	0.000288	1	1.35	1.03	439	1571	1366	1885	427	560	460	45.69	49.05	53.22	48.49	72.17	65.46	Tb927.11.7490,Tb927.11.7500,Tb927.11.8740	6.66832	7.10465
Tb427_060047400.1-p1-CDS1	Tb427_060047400.1	Chr6_core_Tb427v10	Tb927.6.4250	hypothetical protein, conserved	ZUnknown	hypothetical protein, conserved	1071	0.5936	8.17e-10	1	1.38	1	433	2217	1856	2273	433	604	551	64.48	66.65	64.17	49.17	77.84	78.41	Tb927.6.4250	6.82451	7.28771
Tb427_020007000.1-p1-CDS1	Tb427_020007000.1	Chr2_core_Tb427v10	Tb927.2.1920	ESAG5	ESAG	hypothetical protein, conserved	1190	0.6032	4.99e-12	1	1.43	1.77	784	2594	2080	2555	442	678	613	75.44	74.69	72.13	50.2	87.38	87.23	Tb927.2.1920	6.93463	7.44799
Tb427_100106800.1-p1-CDS1	Tb427_100106800.1	Chr10_core_Tb427v10	Tb927.10.10000	hypothetical protein, conserved	ZUnknown	hypothetical protein, conserved	1358	0.6486	8.32e-08	1	1.64	1	437	3181	2425	2702	437	828	698	92.52	87.08	76.28	49.63	106.71	99.33	Tb927.10.10000	6.97625	7.68678
Tb427_110094600.1-p1-CDS1	Tb427_110094600.1	Chr11_core_Tb427v10	Tb927.11.8830	Enriched in surface-labeled proteome protein 2 (ESP2)	ZUnknown	hypothetical protein, conserved	1315	0.6379	1.05e-07	1	1.41	1	582	2634	2083	2615	582	774	683	76.61	74.8	73.83	66.09	99.75	97.19	Tb927.11.8830	7.12846	7.62161
Tb427_000833500.1-p1-CDS2	Tb427_000833500.1	unitig_395_Tb427v10	Tb11.v5.0826	ESAG5	ESAG	hypothetical protein, conserved	1254	0.6107	2.52e-06	1	1.33	6.7	3411	2405	1952	2939	509	703	677	69.95	70.09	82.97	57.8	90.6	96.34	Tb11.v5.0826,Tb927.7.6860	7.1372	7.54643
Tb427_000728600.1-p1-CDS1	Tb427_000728600.1	unitig_2189_Tb427v10	Tb05.5K5.180	GRESAG 4 receptor-type adenylate cyclase	GRESAG	Adenylate and Guanylate cyclase catalytic domain containing protein	1278	0.6331	2.78e-07	1	1.36	8.22	4365	2395	2048	2855	531	731	685	69.66	73.54	80.6	60.3	94.21	97.48	Tb05.5K5.180,Tb05.5K5.190,Tb09.v4.0009,Tb11.v5.0209,Tb11.v5.0217,Tb11.v5.0281,Tb11.v5.0379,Tb11.v5.0380,Tb11.v5.0424,Tb11.v5.0425,Tb11.v5.0429,Tb11.v5.0431,Tb11.v5.0456,Tb11.v5.0470,Tb11.v5.0484,Tb11.v5.0546,Tb11.v5.0576,Tb11.v5.0654,Tb11.v5.0784,Tb11.v5.0821,Tb11.v5.0830,Tb11.v5.0864,Tb11.v5.0865,Tb11.v5.1015,Tb11.v5.1016,Tb927.10.13040,Tb927.10.16000,Tb927.10.16190,Tb927.10.2430,Tb927.11.13740,…	7.13853	7.58263
Tb427_070026200.1-p1-CDS1	Tb427_070026200.1	Chr7_core_Tb427v10	Tb927.7.2160	hypothetical protein, conserved, no domains, no yeast or human match	ZUnknown	hypothetical protein, conserved	1451	0.6843	7.34e-07	1	1.43	1	603	2533	2320	3116	603	949	718	73.67	83.31	87.97	68.48	122.3	102.17	Tb927.7.2160	7.28956	7.81038
Tb427_050007700.1-p1-CDS1	Tb427_050007700.1	Chr5_core_Tb427v10	Tb11.v5.0227	75 kDa invariant surface glycoprotein	Membrane.protein	Invariant surface glycoprotein	1975	0.6989	3.05e-06	1	1.47	4.71	4108	3282	3113	3975	872	1289	1011	95.46	111.78	112.22	99.03	166.12	143.87	Tb11.v5.0227,Tb11.v5.0228,Tb11.v5.0230,Tb11.v5.0231,Tb11.v5.0421,Tb11.v5.0552,Tb927.5.350,Tb927.5.360,Tb927.5.370,Tb927.5.390,Tb927.5.400	7.72281	8.27608
Tb427_080073500.1-p1-CDS1	Tb427_080073500.1	Chr8_core_Tb427v10	Tb927.8.6710	hypothetical protein, conserved	ZUnknown	hypothetical protein, conserved	2478	0.6989	6.71e-14	1	1.49	1.67	1417	5078	4136	5567	850	1493	1312	147.69	148.52	157.16	96.53	192.41	186.7	Tb927.8.6710,Tb927.8.6720,Tb927.8.6730	7.98692	8.56647
Tb427_070082800.1-p1-CDS1	Tb427_070082800.1	Chr7_core_Tb427v10	Tb927.7.7510	hypothetical protein	ZUnknown	hypothetical protein, conserved	2783	0.5923	8.39e-09	1	1.42	6.06	6298	5588	5237	5965	1040	1661	1363	162.52	188.05	168.4	118.11	214.06	193.96	Tb927.7.7510	8.16244	8.6725
Tb427_020015300.1-p1-CDS1	Tb427_020015300.1	Chr2_core_Tb427v10	Tb11.v5.0731	65 kDa invariant surface glycoprotein	Membrane.protein	Invariant surface glycoprotein	2689	0.7026	3.13e-05	1	1.44	4.09	4770	3969	4104	5856	1165	1725	1457	115.44	147.37	165.32	132.3	222.31	207.34	Tb11.v5.0731,Tb927.2.3270,Tb927.2.3280,Tb927.2.3290,Tb927.2.3300,Tb927.2.3310,Tb927.2.3320	8.21733	8.74702
Tb427_050007800.1-p1-CDS1	Tb427_050007800.1	Chr5_core_Tb427v10	Tb11.v5.0227	75 kDa invariant surface glycoprotein	Membrane.protein	Invariant surface glycoprotein	3326	0.8398	1.86e-12	1	1.62	5.38	7219	5547	5131	6511	1341	2116	1910	161.33	184.25	183.82	152.29	272.7	271.8	Tb11.v5.0227,Tb11.v5.0228,Tb11.v5.0230,Tb11.v5.0231,Tb11.v5.0421,Tb11.v5.0552,Tb927.5.350,Tb927.5.360,Tb927.5.370,Tb927.5.390,Tb927.5.400	8.39279	9.08879
Tb427_090005900.1-p1-CDS1	Tb427_090005900.1	Chr9_core_Tb427v10	Tb927.9.1440	Paraquat-inducible protein A	ZUnknown	Paraquat-inducible protein A	3078	0.6081	1.23e-07	1	1.33	1.97	2605	5995	4844	6815	1320	1810	1561	174.36	173.94	192.4	149.9	233.26	222.13	Tb927.9.1440	8.41912	8.83096
Tb427_020015700.1-p1-CDS1	Tb427_020015700.1	Chr2_core_Tb427v10	Tb11.v5.0731	65 kDa invariant surface glycoprotein	Membrane.protein	Invariant surface glycoprotein	3263	0.6975	6.39e-06	1	1.43	3.53	4911	5124	5054	7145	1392	2077	1733	149.03	181.48	201.71	158.08	267.67	246.61	Tb11.v5.0731,Tb927.2.3270,Tb927.2.3280,Tb927.2.3290,Tb927.2.3300,Tb927.2.3310,Tb927.2.3320	8.49101	9.00641
Tb427_050007900.1-p1-CDS1	Tb427_050007900.1	Chr5_core_Tb427v10	Tb11.v5.0227	75 kDa invariant surface glycoprotein	Membrane.protein	Invariant surface glycoprotein	3585	0.7769	2.43e-09	1	1.57	4.83	7222	5981	5740	6979	1496	2355	1914	173.95	206.12	197.03	169.89	303.5	272.37	Tb11.v5.0227,Tb11.v5.0228,Tb11.v5.0230,Tb11.v5.0231,Tb11.v5.0421,Tb11.v5.0552,Tb927.5.350,Tb927.5.360,Tb927.5.370,Tb927.5.390,Tb927.5.400	8.51932	9.1696
Tb427_050008100.1-p1-CDS1	Tb427_050008100.1	Chr5_core_Tb427v10	Tb11.v5.0227	75 kDa invariant surface glycoprotein	Membrane.protein	Invariant surface glycoprotein	3556	0.783	6.02e-09	1	1.56	4.93	7275	5776	5608	7081	1475	2359	1902	167.99	201.38	199.91	167.51	304.02	270.66	Tb11.v5.0227,Tb11.v5.0228,Tb11.v5.0230,Tb11.v5.0231,Tb11.v5.0421,Tb11.v5.0552,Tb927.5.350,Tb927.5.360,Tb927.5.370,Tb927.5.390,Tb927.5.400	8.52129	9.16662
Tb427_050008000.1-p1-CDS1	Tb427_050008000.1	Chr5_core_Tb427v10	Tb11.v5.0227	75 kDa invariant surface glycoprotein	Membrane.protein	Invariant surface glycoprotein	3727	0.829	3.73e-11	1	1.61	4.48	6858	6244	5633	7271	1530	2504	2020	181.6	202.27	205.27	173.75	322.7	287.45	Tb11.v5.0227,Tb11.v5.0228,Tb11.v5.0230,Tb11.v5.0231,Tb11.v5.0421,Tb11.v5.0552,Tb927.5.350,Tb927.5.360,Tb927.5.370,Tb927.5.390,Tb927.5.400	8.56613	9.25302
Tb427_060014100.1-p1-CDS1	Tb427_060014100.1	Chr6_core_Tb427v10	Tb927.6.1000	cysteine peptidase precursor, Clan CA, family C1, Cathepsin L-like (CP)	Protease	Cathepsin propeptide inhibitor domain (I29)/Papain family cysteine protease/Protein of unknown function (DUF3586)	3655	0.656	1.72e-11	1	1.44	13.77	21401	7511	5954	7204	1554	2170	1888	218.45	213.8	203.38	176.48	279.66	268.67	Tb927.6.1000,Tb927.6.1010,Tb927.6.1020,Tb927.6.1030,Tb927.6.1040,Tb927.6.1050,Tb927.6.1060,Tb927.6.960,Tb927.6.970,Tb927.6.980,Tb927.6.990	8.56932	9.0989
Tb427_020015500.1-p1-CDS1	Tb427_020015500.1	Chr2_core_Tb427v10	Tb11.v5.0731	65 kDa invariant surface glycoprotein	Membrane.protein	Invariant surface glycoprotein	3484	0.7412	7.99e-06	1	1.49	3.42	4933	4996	5260	7703	1443	2299	1901	145.31	188.88	217.47	163.87	296.28	270.52	Tb11.v5.0731,Tb927.2.3270,Tb927.2.3280,Tb927.2.3290,Tb927.2.3300,Tb927.2.3310,Tb927.2.3320	8.57493	9.1467
Tb427_060013600.1-p1-CDS1	Tb427_060013600.1	Chr6_core_Tb427v10	Tb927.6.1000	cysteine peptidase precursor, Clan CA, family C1, Cathepsin L-like (CP)	Protease	Cathepsin propeptide inhibitor domain (I29)/Papain family cysteine protease/Protein of unknown function (DUF3586)	3628	0.633	1.1e-10	1	1.41	13.78	21401	7658	5763	7307	1553	2121	1868	222.73	206.94	206.29	176.37	273.34	265.82	Tb927.6.1000,Tb927.6.1010,Tb927.6.1020,Tb927.6.1030,Tb927.6.1040,Tb927.6.1050,Tb927.6.1060,Tb927.6.960,Tb927.6.970,Tb927.6.980,Tb927.6.990	8.57992	9.07457
Tb427_060013200.1-p1-CDS1	Tb427_060013200.1	Chr6_core_Tb427v10	Tb927.6.1000	cysteine peptidase precursor, Clan CA, family C1, Cathepsin L-like (CP)	Protease	Cathepsin propeptide inhibitor domain (I29)/Papain family cysteine protease/Protein of unknown function (DUF3586)	3606	0.6175	8.39e-09	1	1.39	13.54	21403	7373	5804	7273	1581	2119	1834	214.44	208.41	205.33	179.55	273.09	260.98	Tb927.6.1000,Tb927.6.1010,Tb927.6.1020,Tb927.6.1030,Tb927.6.1040,Tb927.6.1050,Tb927.6.1060,Tb927.6.960,Tb927.6.970,Tb927.6.980,Tb927.6.990	8.58826	9.06089
Tb427_000020700.1-p1-CDS1	Tb427_000020700.1	BES4_Tb427v10	Tb11.v5.0826	ESAG5	ESAG	hypothetical protein, conserved	3419	0.5875	3.95e-06	1	1.31	9.57	12133	6749	5460	8538	1268	2045	1695	196.29	196.06	241.04	144	263.55	241.2	Tb11.v5.0826,Tb927.7.6860	8.58886	8.97943
Tb427_060013400.1-p1-CDS1	Tb427_060013400.1	Chr6_core_Tb427v10	Tb927.6.1000	cysteine peptidase precursor, Clan CA, family C1, Cathepsin L-like (CP)	Protease	Cathepsin propeptide inhibitor domain (I29)/Papain family cysteine protease/Protein of unknown function (DUF3586)	3704	0.6452	1.48e-09	1	1.43	13.33	21401	7655	5856	7336	1606	2224	1887	222.64	210.28	207.11	182.38	286.62	268.53	Tb927.6.1000,Tb927.6.1010,Tb927.6.1020,Tb927.6.1030,Tb927.6.1040,Tb927.6.1050,Tb927.6.1060,Tb927.6.960,Tb927.6.970,Tb927.6.980,Tb927.6.990	8.60544	9.11673
Tb427_060013300.1-p1-CDS1	Tb427_060013300.1	Chr6_core_Tb427v10	Tb927.6.1000	cysteine peptidase precursor, Clan CA, family C1, Cathepsin L-like (CP)	Protease	Cathepsin propeptide inhibitor domain (I29)/Papain family cysteine protease/Protein of unknown function (DUF3586)	3685	0.6193	2.01e-09	1	1.39	13.35	21401	7533	5967	7476	1603	2145	1890	219.09	214.27	211.06	182.04	276.44	268.95	Tb927.6.1000,Tb927.6.1010,Tb927.6.1020,Tb927.6.1030,Tb927.6.1040,Tb927.6.1050,Tb927.6.1060,Tb927.6.960,Tb927.6.970,Tb927.6.980,Tb927.6.990	8.61875	9.09114
Tb427_060013000.1-p1-CDS1	Tb427_060013000.1	Chr6_core_Tb427v10	Tb927.6.1000	cysteine peptidase precursor, Clan CA, family C1, Cathepsin L-like (CP)	Protease	Cathepsin propeptide inhibitor domain (I29)/Papain family cysteine protease/Protein of unknown function (DUF3586)	3745	0.6262	1.55e-09	1	1.4	13.25	21404	7590	6111	7601	1616	2246	1874	220.75	219.44	214.59	183.52	289.45	266.68	Tb927.6.1000,Tb927.6.1010,Tb927.6.1020,Tb927.6.1030,Tb927.6.1040,Tb927.6.1050,Tb927.6.1060,Tb927.6.960,Tb927.6.970,Tb927.6.980,Tb927.6.990	8.63702	9.11928
Tb427_060013800.1-p1-CDS1	Tb427_060013800.1	Chr6_core_Tb427v10	Tb927.6.1000	cysteine peptidase precursor, Clan CA, family C1, Cathepsin L-like (CP)	Protease	Cathepsin propeptide inhibitor domain (I29)/Papain family cysteine protease/Protein of unknown function (DUF3586)	3691	0.587	5.28e-06	1	1.36	12.57	21401	7466	5808	7342	1702	2139	1885	217.14	208.56	207.28	193.29	275.66	268.24	Tb927.6.1000,Tb927.6.1010,Tb927.6.1020,Tb927.6.1030,Tb927.6.1040,Tb927.6.1050,Tb927.6.1060,Tb927.6.960,Tb927.6.970,Tb927.6.980,Tb927.6.990	8.64591	9.0872
Tb427_040014600.1-p1-CDS1	Tb427_040014600.1	Chr4_core_Tb427v10	Tb927.4.1230	hypothetical protein	ZUnknown	hypothetical protein, conserved	4093	0.6672	9.58e-15	1	1.5	1	1407	8652	7241	8861	1407	2446	2116	251.64	260.02	250.16	159.78	315.23	301.11	Tb927.4.1230	8.67927	9.26758
Tb427_060014000.1-p1-CDS1	Tb427_060014000.1	Chr6_core_Tb427v10	Tb927.6.1000	cysteine peptidase precursor, Clan CA, family C1, Cathepsin L-like (CP)	Protease	Cathepsin propeptide inhibitor domain (I29)/Papain family cysteine protease/Protein of unknown function (DUF3586)	3882	0.6391	2.97e-09	1	1.41	12.63	21400	7983	6113	7742	1695	2294	2002	232.18	219.51	218.57	192.49	295.64	284.89	Tb927.6.1000,Tb927.6.1010,Tb927.6.1020,Tb927.6.1030,Tb927.6.1040,Tb927.6.1050,Tb927.6.1060,Tb927.6.960,Tb927.6.970,Tb927.6.980,Tb927.6.990	8.68321	9.18123
Tb427_060013700.1-p1-CDS1	Tb427_060013700.1	Chr6_core_Tb427v10	Tb927.6.1000	cysteine peptidase precursor, Clan CA, family C1, Cathepsin L-like (CP)	Protease	Cathepsin propeptide inhibitor domain (I29)/Papain family cysteine protease/Protein of unknown function (DUF3586)	3822	0.5859	3.95e-06	1	1.36	12.19	21406	7781	6051	7578	1756	2231	1933	226.31	217.28	213.94	199.42	287.52	275.07	Tb927.6.1000,Tb927.6.1010,Tb927.6.1020,Tb927.6.1030,Tb927.6.1040,Tb927.6.1050,Tb927.6.1060,Tb927.6.960,Tb927.6.970,Tb927.6.980,Tb927.6.990	8.69125	9.13594
Tb427_060014200.1-p1-CDS1	Tb427_060014200.1	Chr6_core_Tb427v10	Tb927.6.1000	cysteine peptidase precursor, Clan CA, family C1, Cathepsin L-like (CP)	Protease	Cathepsin propeptide inhibitor domain (I29)/Papain family cysteine protease/Protein of unknown function (DUF3586)	3909	0.6083	6.76e-08	1	1.39	12.36	21399	8034	6283	7809	1731	2330	1951	233.66	225.61	220.46	196.58	300.28	277.63	Tb927.6.1000,Tb927.6.1010,Tb927.6.1020,Tb927.6.1030,Tb927.6.1040,Tb927.6.1050,Tb927.6.1060,Tb927.6.960,Tb927.6.970,Tb927.6.980,Tb927.6.990	8.70404	9.1747
Tb427_050008200.1-p1-CDS1	Tb427_050008200.1	Chr5_core_Tb427v10	Tb11.v5.0227	75 kDa invariant surface glycoprotein	Membrane.protein	Invariant surface glycoprotein	4395	0.8765	6.46e-13	1	1.68	3.87	6855	7214	6690	8266	1773	2945	2477	209.82	240.23	233.36	201.35	379.54	352.48	Tb11.v5.0227,Tb11.v5.0228,Tb11.v5.0230,Tb11.v5.0231,Tb11.v5.0421,Tb11.v5.0552,Tb927.5.350,Tb927.5.360,Tb927.5.370,Tb927.5.390,Tb927.5.400	8.76391	9.51574
Tb427_090006300.1-p1-CDS1	Tb427_090006300.1	Chr9_core_Tb427v10	Tb927.9.1440	Paraquat-inducible protein A	ZUnknown	Paraquat-inducible protein A	3933	0.6175	4.8e-07	1	1.32	1.8	2875	7425	6131	9301	1595	2326	2017	215.95	220.16	262.58	181.13	299.76	287.02	Tb927.9.1440	8.79347	9.19668
Tb427_060009000.1-p1-CDS1	Tb427_060009000.1	Chr6_core_Tb427v10	Tb927.6.560	cysteine peptidase C (CPC), Clan CA, family C1, Cathepsin B-like (TbcatB)	Protease	Papain family cysteine protease	4414	0.7844	5.43e-11	1	1.57	1	1893	8306	6436	8286	1893	2807	2422	241.58	231.11	233.93	214.98	361.75	344.66	Tb927.6.560	8.81028	9.46436
Tb427_070053300.1-p1-CDS1	Tb427_070053300.1	Chr7_core_Tb427v10	Tb11.v5.0160	cyclophilin-type peptidyl-prolyl cis-trans isomerase	Chaperone	Cyclophilin type peptidyl-prolyl cis-trans isomerase/CLD	4759	0.6387	4.15e-15	1	1.49	1	1749	10750	8161	9778	1749	2905	2335	312.66	293.05	276.05	198.62	374.38	332.28	Tb11.v5.0160,Tb927.7.4770	8.89078	9.46487
Tb427_050011000.1-p1-CDS1	Tb427_050011000.1	Chr5_core_Tb427v10	Tb927.5.630	acidic phosphatase	Phosphatase	Invariant surface glycoprotein	5708	0.6911	1.76e-16	1	1.55	1.01	2178	12096	9988	11051	2165	3545	2875	351.81	358.66	311.99	245.87	456.86	409.12	Tb927.5.630	9.12376	9.75819
Tb427_010015900.1-p1-CDS1	Tb427_010015900.1	Chr1_core_Tb427v10	Tb927.1.2100	calpain-like cysteine peptidase,cysteine peptidase, Clan CA, family C2	Protease	Domain of unknown function (DUF1935)/Calpain family cysteine protease	9392	0.684	5.53e-06	1	1.43	2.4	10371	15956	14037	18860	4324	5677	5169	464.07	504.05	532.45	491.05	731.62	735.56	Tb927.1.2100,Tb927.9.7540	9.9993	10.5188
Tb427_000762200.1-p1-CDS3	Tb427_000762200.1	unitig_2342_Tb427v10	Tb927.2.1060	retrotransposon hot spot protein (RHS1, pseudogene)	RHS	Retrotransposon hot spot protein	1	-0.0081	NA	0	0	17	17	2	1	0	1	0	0	0.06	0.04	0	0.11	0	0	Tb927.2.1060,Tb927.2.1160,Tb927.2.220
Tb427_000405200.1-p1-CDS1	Tb427_000405200.1	Chr6_3A_Tb427v10	Tb11.v5.0449	Variant Surface Glycoprotein	VSG	Trypanosome variant surface glycoprotein (A-type)/Trypanosome variant surface glycoprotein C-terminal domain containing protein	1	0.0242	NA	0	1.18	1	1	0	0	0	1	1	0	0	0	0	0.11	0.13	0	Tb11.v5.0449,Tb11.v5.0954,Tb927.11.17550,Tb927.4.5730,Tb927.5.4820,Tb927.5.5320
Tb427_000377500.1-p1-CDS4	Tb427_000377500.1	Chr5_3B_Tb427v10	Tb927.5.5530	Variant Surface Glycoprotein	VSG	Trypanosomal VSG domain containing protein	0	0.0056	NA	0	0	1	1	0	0	0	1	0	0	0	0	0	0.11	0	0	Tb927.5.5530,Tb927.6.5230,Tb927.9.18110
Tb427_000043900.1-p1-CDS1	Tb427_000043900.1	Chr10_3A_Tb427v10	Tb08.27P2.220	variant surface glycoprotein (VSG, atypical)	VSG	Trypanosome variant surface glycoprotein (A-type)/Trypanosome variant surface glycoprotein C-terminal domain containing protein	0	0.0014	NA	0	0	1	1	0	1	0	1	0	0	0	0.04	0	0.11	0	0	Tb08.27P2.220,Tb09.v4.0054,Tb09.v4.0175,Tb10.v4.0251,Tb11.0510,Tb11.v5.0870,Tb927.11.18820,Tb927.9.16090,Tb927.9.300
Tb427_000034200.1-p1-CDS1	Tb427_000034200.1	Chr10_3A_Tb427v10	Tb08.27P2.220	variant surface glycoprotein (VSG, atypical)	VSG	Trypanosome variant surface glycoprotein (A-type)	0	0.0056	NA	0	0	1	1	0	0	0	1	0	0	0	0	0	0.11	0	0	Tb08.27P2.220,Tb09.v4.0054,Tb09.v4.0175,Tb10.v4.0251,Tb11.0510,Tb11.v5.0870,Tb927.11.18820,Tb927.9.16090,Tb927.9.300
Tb427_000033100.1-p1-CDS1	Tb427_000033100.1	Chr10_3A_Tb427v10	Tb08.27P2.260	variant surface glycoprotein (VSG, atypical)	VSG	Trypanosome variant surface glycoprotein (A-type)/Trypanosome variant surface glycoprotein C-terminal domain containing protein	0	0.0014	NA	0	0	9	9	0	1	0	1	0	0	0	0.04	0	0.11	0	0	Tb08.27P2.260
Tb427_000465100.1-p1-CDS1	Tb427_000465100.1	Chr7_5A_Tb427v10	Tb08.27P2.670	variant surface glycoprotein (VSG, atypical)	VSG	Trypanosomal VSG domain containing protein	1	-0.0081	NA	0	0	1	1	2	1	0	1	0	0	0.06	0.04	0	0.11	0	0	Tb08.27P2.670,Tb09.v4.0037,Tb09.v4.0075,Tb09.v4.0183,Tb10.v4.0086,Tb10.v4.0152,Tb10.v4.0166,Tb10.v4.0175,Tb11.0250,Tb11.1560,Tb11.v5.0139,Tb11.v5.0829,Tb11.v5.0939,Tb11.v5.0943,Tb927.11.17090,Tb927.11.17540,Tb927.11.18470,Tb927.11.18550,Tb927.11.20080,Tb927.4.5640,Tb927.5.5130,Tb927.5.5170,Tb927.6.5330,Tb927.6.5600,Tb927.9.17950,Tb927.9.250
Tb427_000505000.1-p1-CDS2	Tb427_000505000.1	Chr8_5A_Tb427v10	Tb08.27P2.670	variant surface glycoprotein (VSG, atypical)	VSG	Trypanosomal VSG domain/Trypanosome variant surface glycoprotein C-terminal domain containing protein	0	0.0014	NA	0	0	1	1	0	1	0	1	0	0	0	0.04	0	0.11	0	0	Tb08.27P2.670,Tb09.v4.0037,Tb09.v4.0075,Tb09.v4.0183,Tb10.v4.0086,Tb10.v4.0152,Tb10.v4.0166,Tb10.v4.0175,Tb11.0250,Tb11.1560,Tb11.v5.0139,Tb11.v5.0829,Tb11.v5.0939,Tb11.v5.0943,Tb927.11.17090,Tb927.11.17540,Tb927.11.18470,Tb927.11.18550,Tb927.11.20080,Tb927.4.5640,Tb927.5.5130,Tb927.5.5170,Tb927.6.5330,Tb927.6.5600,Tb927.9.17950,Tb927.9.250
Tb427_000328900.1-p1-CDS1	Tb427_000328900.1	Chr4_3A_Tb427v10	Tb08.27P2.670	variant surface glycoprotein (VSG, atypical)	VSG	Trypanosomal VSG domain containing protein	0	0.0056	NA	0	0	1	1	0	0	0	1	0	0	0	0	0	0.11	0	0	Tb08.27P2.670,Tb09.v4.0037,Tb09.v4.0075,Tb09.v4.0183,Tb10.v4.0086,Tb10.v4.0152,Tb10.v4.0166,Tb10.v4.0175,Tb11.0250,Tb11.1560,Tb11.v5.0139,Tb11.v5.0829,Tb11.v5.0939,Tb11.v5.0943,Tb927.11.17090,Tb927.11.17540,Tb927.11.18470,Tb927.11.18550,Tb927.11.20080,Tb927.4.5640,Tb927.5.5130,Tb927.5.5170,Tb927.6.5330,Tb927.6.5600,Tb927.9.17950,Tb927.9.250
Tb427_000334600.1-p1-CDS2	Tb427_000334600.1	Chr4_3A_Tb427v10	Tb08.27P2.670	variant surface glycoprotein (VSG, atypical)	VSG	Trypanosomal VSG domain containing protein	0	0.0056	NA	0	0	1	1	0	0	0	1	0	0	0	0	0	0.11	0	0	Tb08.27P2.670,Tb09.v4.0037,Tb09.v4.0075,Tb09.v4.0183,Tb10.v4.0086,Tb10.v4.0152,Tb10.v4.0166,Tb10.v4.0175,Tb11.0250,Tb11.1560,Tb11.v5.0139,Tb11.v5.0829,Tb11.v5.0939,Tb11.v5.0943,Tb927.11.17090,Tb927.11.17540,Tb927.11.18470,Tb927.11.18550,Tb927.11.20080,Tb927.4.5640,Tb927.5.5130,Tb927.5.5170,Tb927.6.5330,Tb927.6.5600,Tb927.9.17950,Tb927.9.250
Tb427_000418000.1-p1-CDS1	Tb427_000418000.1	Chr6_3A_Tb427v10	Tb08.27P2.670	variant surface glycoprotein (VSG, atypical)	VSG	hypothetical protein	0	0.0056	NA	0	0	1	1	0	0	0	1	0	0	0	0	0	0.11	0	0	Tb08.27P2.670,Tb09.v4.0037,Tb09.v4.0075,Tb09.v4.0183,Tb10.v4.0086,Tb10.v4.0152,Tb10.v4.0166,Tb10.v4.0175,Tb11.0250,Tb11.1560,Tb11.v5.0139,Tb11.v5.0829,Tb11.v5.0939,Tb11.v5.0943,Tb927.11.17090,Tb927.11.17540,Tb927.11.18470,Tb927.11.18550,Tb927.11.20080,Tb927.4.5640,Tb927.5.5130,Tb927.5.5170,Tb927.6.5330,Tb927.6.5600,Tb927.9.17950,Tb927.9.250
Tb427_000513700.1-p1-CDS1	Tb427_000513700.1	Chr8_5A_Tb427v10	Tb09.v4.0113	variant surface glycoprotein (VSG, atypical)	VSG	Trypanosomal VSG domain containing protein	0	0.0024	NA	0	0	1	1	1	0	0	1	0	0	0.03	0	0	0.11	0	0	Tb09.v4.0113,Tb11.v5.0957,Tb927.11.17510,Tb927.11.19490,Tb927.5.5380,Tb927.9.330
Tb427_000300900.1-p1-CDS3	Tb427_000300900.1	Chr3_5A_Tb427v10	Tb09.v4.0113	variant surface glycoprotein (VSG, atypical)	VSG	Trypanosomal VSG domain/Trypanosome variant surface glycoprotein C-terminal domain containing protein	1	0.0242	NA	0	1.18	1	1	0	0	0	1	1	0	0	0	0	0.11	0.13	0	Tb09.v4.0113,Tb11.v5.0957,Tb927.11.17510,Tb927.11.19490,Tb927.5.5380,Tb927.9.330
Tb427_000041700.1-p1-CDS1	Tb427_000041700.1	Chr10_3A_Tb427v10	Tb09.v4.0136	variant surface glycoprotein (VSG, atypical)	VSG	Trypanosome variant surface glycoprotein (A-type)/Trypanosome variant surface glycoprotein C-terminal domain containing protein	0	0.0056	NA	0	0	1	1	0	0	0	1	0	0	0	0	0	0.11	0	0	Tb09.v4.0136,Tb09.v4.0196,Tb10.v4.0212,Tb11.0500,Tb11.1130,Tb11.v5.0599,Tb11.v5.0952,Tb927.11.17670,Tb927.11.18140,Tb927.11.19450,Tb927.11.20200,Tb927.3.280,Tb927.4.5670,Tb927.5.5300
Tb427_000251300.1-p1-CDS1	Tb427_000251300.1	Chr1_3B_Tb427v10	Tb09.v4.0136	variant surface glycoprotein (VSG, atypical)	VSG	Trypanosome variant surface glycoprotein (A-type)	0	0.0056	NA	0	0	1	1	0	0	0	1	0	0	0	0	0	0.11	0	0	Tb09.v4.0136,Tb09.v4.0196,Tb10.v4.0212,Tb11.0500,Tb11.1130,Tb11.v5.0599,Tb11.v5.0952,Tb927.11.17670,Tb927.11.18140,Tb927.11.19450,Tb927.11.20200,Tb927.3.280,Tb927.4.5670,Tb927.5.5300
Tb427_000521700.1-p1-CDS1	Tb427_000521700.1	Chr8_5A_Tb427v10	Tb927.6.5550	variant surface glycoprotein (VSG, atypical)	VSG	Trypanosome variant surface glycoprotein C-terminal domain containing protein	0	0.0024	NA	0	0	1	1	1	0	0	1	0	0	0.03	0	0	0.11	0	0	Tb927.6.5550
Tb427_000413500.1-p1-CDS1	Tb427_000413500.1	Chr6_3A_Tb427v10	Tb927.11.19480	variant surface glycoprotein (VSG, pseudogene),variant surface glycoprotein (VSG), point mutation	VSG	Trypanosomal VSG domain containing protein	0	0.0056	NA	0	0	1	1	0	0	0	1	0	0	0	0	0	0.11	0	0	Tb927.11.19480,Tb927.5.270
Tb427_000405000.1-p1-CDS3	Tb427_000405000.1	Chr6_3A_Tb427v10	Tb05.5K5.320	variant surface glycoprotein (VSG)	VSG	hypothetical protein, conserved	0	0.0014	NA	0	0	1	1	0	1	0	1	0	0	0	0.04	0	0.11	0	0	Tb05.5K5.320,Tb09.v4.0021,Tb09.v4.0061,Tb09.v4.0114,Tb09.v4.0145,Tb09.v4.0191,Tb10.v4.0063,Tb10.v4.0122,Tb10.v4.0127,Tb10.v4.0176,Tb10.v4.0179,Tb10.v4.0210,Tb10.v4.0237,Tb10.v4.0264,Tb11.0180,Tb11.1480b,Tb11.v4.0041,Tb11.v5.0128,Tb11.v5.0284,Tb11.v5.0803,Tb11.v5.0913,Tb927.10.16230,Tb927.10.16440,Tb927.10.16470,Tb927.10.16480,Tb927.11.17660,Tb927.11.18580,Tb927.11.18980,Tb927.3.330,Tb927.5.4670,T…
Tb427_000405000.1-p1-CDS2	Tb427_000405000.1	Chr6_3A_Tb427v10	Tb05.5K5.320	variant surface glycoprotein (VSG)	VSG	hypothetical protein, conserved	0	0.0024	NA	0	0	1	1	1	0	0	1	0	0	0.03	0	0	0.11	0	0	Tb05.5K5.320,Tb09.v4.0021,Tb09.v4.0061,Tb09.v4.0114,Tb09.v4.0145,Tb09.v4.0191,Tb10.v4.0063,Tb10.v4.0122,Tb10.v4.0127,Tb10.v4.0176,Tb10.v4.0179,Tb10.v4.0210,Tb10.v4.0237,Tb10.v4.0264,Tb11.0180,Tb11.1480b,Tb11.v4.0041,Tb11.v5.0128,Tb11.v5.0284,Tb11.v5.0803,Tb11.v5.0913,Tb927.10.16230,Tb927.10.16440,Tb927.10.16470,Tb927.10.16480,Tb927.11.17660,Tb927.11.18580,Tb927.11.18980,Tb927.3.330,Tb927.5.4670,T…
Tb427_000143800.1-p1-CDS1	Tb427_000143800.1	Chr11_3A_Tb427v10	Tb05.5K5.320	variant surface glycoprotein (VSG)	VSG	hypothetical protein, conserved	0	0.0056	NA	0	0	1	1	0	0	0	1	0	0	0	0	0	0.11	0	0	Tb05.5K5.320,Tb09.v4.0021,Tb09.v4.0061,Tb09.v4.0114,Tb09.v4.0145,Tb09.v4.0191,Tb10.v4.0063,Tb10.v4.0122,Tb10.v4.0127,Tb10.v4.0176,Tb10.v4.0179,Tb10.v4.0210,Tb10.v4.0237,Tb10.v4.0264,Tb11.0180,Tb11.1480b,Tb11.v4.0041,Tb11.v5.0128,Tb11.v5.0284,Tb11.v5.0803,Tb11.v5.0913,Tb927.10.16230,Tb927.10.16440,Tb927.10.16470,Tb927.10.16480,Tb927.11.17660,Tb927.11.18580,Tb927.11.18980,Tb927.3.330,Tb927.5.4670,T…
Tb427_000176200.1-p1-CDS2	Tb427_000176200.1	Chr1_3A_Tb427v10	Tb05.5K5.320	variant surface glycoprotein (VSG)	VSG	hypothetical protein	0	0.0056	NA	0	0	1	1	0	0	0	1	0	0	0	0	0	0.11	0	0	Tb05.5K5.320,Tb09.v4.0021,Tb09.v4.0061,Tb09.v4.0114,Tb09.v4.0145,Tb09.v4.0191,Tb10.v4.0063,Tb10.v4.0122,Tb10.v4.0127,Tb10.v4.0176,Tb10.v4.0179,Tb10.v4.0210,Tb10.v4.0237,Tb10.v4.0264,Tb11.0180,Tb11.1480b,Tb11.v4.0041,Tb11.v5.0128,Tb11.v5.0284,Tb11.v5.0803,Tb11.v5.0913,Tb927.10.16230,Tb927.10.16440,Tb927.10.16470,Tb927.10.16480,Tb927.11.17660,Tb927.11.18580,Tb927.11.18980,Tb927.3.330,Tb927.5.4670,T…
Tb427_000216100.1-p1-CDS1	Tb427_000216100.1	Chr1_3A_Tb427v10	Tb05.5K5.320	variant surface glycoprotein (VSG)	VSG	hypothetical protein	0	0.0056	NA	0	0	1	1	0	0	0	1	0	0	0	0	0	0.11	0	0	Tb05.5K5.320,Tb09.v4.0021,Tb09.v4.0061,Tb09.v4.0114,Tb09.v4.0145,Tb09.v4.0191,Tb10.v4.0063,Tb10.v4.0122,Tb10.v4.0127,Tb10.v4.0176,Tb10.v4.0179,Tb10.v4.0210,Tb10.v4.0237,Tb10.v4.0264,Tb11.0180,Tb11.1480b,Tb11.v4.0041,Tb11.v5.0128,Tb11.v5.0284,Tb11.v5.0803,Tb11.v5.0913,Tb927.10.16230,Tb927.10.16440,Tb927.10.16470,Tb927.10.16480,Tb927.11.17660,Tb927.11.18580,Tb927.11.18980,Tb927.3.330,Tb927.5.4670,T…
Tb427_000599000.1-p1-CDS1	Tb427_000599000.1	Chr9_3A_Tb427v10	Tb05.5K5.320	variant surface glycoprotein (VSG)	VSG	hypothetical protein, conserved	0	0.0056	NA	0	0	1	1	0	0	0	1	0	0	0	0	0	0.11	0	0	Tb05.5K5.320,Tb09.v4.0021,Tb09.v4.0061,Tb09.v4.0114,Tb09.v4.0145,Tb09.v4.0191,Tb10.v4.0063,Tb10.v4.0122,Tb10.v4.0127,Tb10.v4.0176,Tb10.v4.0179,Tb10.v4.0210,Tb10.v4.0237,Tb10.v4.0264,Tb11.0180,Tb11.1480b,Tb11.v4.0041,Tb11.v5.0128,Tb11.v5.0284,Tb11.v5.0803,Tb11.v5.0913,Tb927.10.16230,Tb927.10.16440,Tb927.10.16470,Tb927.10.16480,Tb927.11.17660,Tb927.11.18580,Tb927.11.18980,Tb927.3.330,Tb927.5.4670,T…
Tb427_000405000.1-p1-CDS1	Tb427_000405000.1	Chr6_3A_Tb427v10	Tb05.5K5.320	variant surface glycoprotein (VSG)	VSG	hypothetical protein, conserved	1	0.025	NA	0	1.18	1	1	1	0	0	1	1	0	0.03	0	0	0.11	0.13	0	Tb05.5K5.320,Tb09.v4.0021,Tb09.v4.0061,Tb09.v4.0114,Tb09.v4.0145,Tb09.v4.0191,Tb10.v4.0063,Tb10.v4.0122,Tb10.v4.0127,Tb10.v4.0176,Tb10.v4.0179,Tb10.v4.0210,Tb10.v4.0237,Tb10.v4.0264,Tb11.0180,Tb11.1480b,Tb11.v4.0041,Tb11.v5.0128,Tb11.v5.0284,Tb11.v5.0803,Tb11.v5.0913,Tb927.10.16230,Tb927.10.16440,Tb927.10.16470,Tb927.10.16480,Tb927.11.17660,Tb927.11.18580,Tb927.11.18980,Tb927.3.330,Tb927.5.4670,T…
Tb427_000396700.1-p1-CDS1	Tb427_000396700.1	Chr6_3A_Tb427v10	Tb05.5K5.530	variant surface glycoprotein (VSG)	VSG	hypothetical protein, conserved	0	0.0056	NA	0	0	2	2	0	0	0	1	0	0	0	0	0	0.11	0	0	Tb05.5K5.530,Tb10.v4.0070,Tb10.v4.0113,Tb10.v4.0263,Tb11.0910,Tb11.v5.0297,Tb11.v5.0949,Tb11.v5.1033,Tb927.1.5300,Tb927.11.18900,Tb927.11.18970,Tb927.11.20710,Tb927.5.5650,Tb927.6.5780,Tb927.8.170,Tb927.8.280,Tb927.9.1010,Tb927.9.16690,Tb927.9.17880
Tb427_000403300.1-p1-CDS1	Tb427_000403300.1	Chr6_3A_Tb427v10	Tb05.5K5.530	variant surface glycoprotein (VSG)	VSG	hypothetical protein, conserved	1	0.025	NA	0	1.18	2	2	1	0	0	1	1	0	0.03	0	0	0.11	0.13	0	Tb05.5K5.530,Tb10.v4.0070,Tb10.v4.0113,Tb10.v4.0263,Tb11.0910,Tb11.v5.0297,Tb11.v5.0949,Tb11.v5.1033,Tb927.1.5300,Tb927.11.18900,Tb927.11.18970,Tb927.11.20710,Tb927.5.5650,Tb927.6.5780,Tb927.8.170,Tb927.8.280,Tb927.9.1010,Tb927.9.16690,Tb927.9.17880
Tb427_000490600.1-p1-CDS1	Tb427_000490600.1	Chr8_3A_Tb427v10	Tb08.27P2.460	variant surface glycoprotein (VSG)	VSG	hypothetical protein, conserved	0	-0.0019	NA	0	0	2	2	2	0	0	1	0	0	0.06	0	0	0.11	0	0	Tb08.27P2.460,Tb08.27P2.650,Tb08.27P2.720,Tb09.v4.0022,Tb09.v4.0055,Tb09.v4.0112,Tb09.v4.0141,Tb09.v4.0143,Tb09.v4.0195,Tb10.v4.0079,Tb10.v4.0112,Tb10.v4.0115,Tb10.v4.0148,Tb10.v4.0190,Tb10.v4.0193,Tb10.v4.0257,Tb11.0090,Tb11.0130,Tb11.0280,Tb11.0570,Tb11.57.0047,Tb11.57.0047b,Tb11.v5.0119,Tb11.v5.0123,Tb11.v5.1028,Tb927.11.17120,Tb927.11.17150,Tb927.11.17780,Tb927.11.19210,Tb927.11.19380,Tb927.1…
Tb427_000187200.1-p1-CDS1	Tb427_000187200.1	Chr1_3A_Tb427v10	Tb08.27P2.460	variant surface glycoprotein (VSG)	VSG	hypothetical protein, conserved	0	0.0056	NA	0	0	1	1	0	0	0	1	0	0	0	0	0	0.11	0	0	Tb08.27P2.460,Tb08.27P2.650,Tb08.27P2.720,Tb09.v4.0022,Tb09.v4.0055,Tb09.v4.0112,Tb09.v4.0141,Tb09.v4.0143,Tb09.v4.0195,Tb10.v4.0079,Tb10.v4.0112,Tb10.v4.0115,Tb10.v4.0148,Tb10.v4.0190,Tb10.v4.0193,Tb10.v4.0257,Tb11.0090,Tb11.0130,Tb11.0280,Tb11.0570,Tb11.57.0047,Tb11.57.0047b,Tb11.v5.0119,Tb11.v5.0123,Tb11.v5.1028,Tb927.11.17120,Tb927.11.17150,Tb927.11.17780,Tb927.11.19210,Tb927.11.19380,Tb927.1…
Tb427_000251200.1-p1-CDS3	Tb427_000251200.1	Chr1_3B_Tb427v10	Tb08.27P2.460	variant surface glycoprotein (VSG)	VSG	hypothetical protein, conserved	0	0.0056	NA	0	0	1	1	0	0	0	1	0	0	0	0	0	0.11	0	0	Tb08.27P2.460,Tb08.27P2.650,Tb08.27P2.720,Tb09.v4.0022,Tb09.v4.0055,Tb09.v4.0112,Tb09.v4.0141,Tb09.v4.0143,Tb09.v4.0195,Tb10.v4.0079,Tb10.v4.0112,Tb10.v4.0115,Tb10.v4.0148,Tb10.v4.0190,Tb10.v4.0193,Tb10.v4.0257,Tb11.0090,Tb11.0130,Tb11.0280,Tb11.0570,Tb11.57.0047,Tb11.57.0047b,Tb11.v5.0119,Tb11.v5.0123,Tb11.v5.1028,Tb927.11.17120,Tb927.11.17150,Tb927.11.17780,Tb927.11.19210,Tb927.11.19380,Tb927.1…
Tb427_000717600.1-p1-CDS4	Tb427_000717600.1	unitig_2138_Tb427v10	Tb08.27P2.460	variant surface glycoprotein (VSG)	VSG	hypothetical protein, conserved	0	0.0056	NA	0	0	1	1	0	0	0	1	0	0	0	0	0	0.11	0	0	Tb08.27P2.460,Tb08.27P2.650,Tb08.27P2.720,Tb09.v4.0022,Tb09.v4.0055,Tb09.v4.0112,Tb09.v4.0141,Tb09.v4.0143,Tb09.v4.0195,Tb10.v4.0079,Tb10.v4.0112,Tb10.v4.0115,Tb10.v4.0148,Tb10.v4.0190,Tb10.v4.0193,Tb10.v4.0257,Tb11.0090,Tb11.0130,Tb11.0280,Tb11.0570,Tb11.57.0047,Tb11.57.0047b,Tb11.v5.0119,Tb11.v5.0123,Tb11.v5.1028,Tb927.11.17120,Tb927.11.17150,Tb927.11.17780,Tb927.11.19210,Tb927.11.19380,Tb927.1…
Tb427_000567300.1-p1-CDS1	Tb427_000567300.1	Chr9_3A_Tb427v10	Tb08.27P2.460	variant surface glycoprotein (VSG)	VSG	hypothetical protein, conserved	1	0.0242	NA	0	1.18	2	2	0	0	0	1	1	0	0	0	0	0.11	0.13	0	Tb08.27P2.460,Tb08.27P2.650,Tb08.27P2.720,Tb09.v4.0022,Tb09.v4.0055,Tb09.v4.0112,Tb09.v4.0141,Tb09.v4.0143,Tb09.v4.0195,Tb10.v4.0079,Tb10.v4.0112,Tb10.v4.0115,Tb10.v4.0148,Tb10.v4.0190,Tb10.v4.0193,Tb10.v4.0257,Tb11.0090,Tb11.0130,Tb11.0280,Tb11.0570,Tb11.57.0047,Tb11.57.0047b,Tb11.v5.0119,Tb11.v5.0123,Tb11.v5.1028,Tb927.11.17120,Tb927.11.17150,Tb927.11.17780,Tb927.11.19210,Tb927.11.19380,Tb927.1…
Tb427_000547100.1-p1-CDS2	Tb427_000547100.1	Chr8_5B_Tb427v10	Tb09.v4.0026	variant surface glycoprotein (VSG)	VSG	Trypanosomal VSG domain containing protein	0	0.0024	NA	0	0	2	2	1	0	0	1	0	0	0.03	0	0	0.11	0	0	Tb09.v4.0026,Tb10.v4.0189,Tb10.v4.0235,Tb11.v5.0673,Tb11.v5.0682,Tb927.11.17350,Tb927.3.120,Tb927.4.5650,Tb927.5.5680,Tb927.9.17330
Tb427_000617300.1-p1-CDS1	Tb427_000617300.1	Chr9_5A_Tb427v10	Tb09.v4.0026	variant surface glycoprotein (VSG)	VSG	Trypanosomal VSG domain/Trypanosome variant surface glycoprotein C-terminal domain containing protein	1	0.025	NA	0	1.18	4	4	1	0	0	1	1	0	0.03	0	0	0.11	0.13	0	Tb09.v4.0026,Tb10.v4.0189,Tb10.v4.0235,Tb11.v5.0673,Tb11.v5.0682,Tb927.11.17350,Tb927.3.120,Tb927.4.5650,Tb927.5.5680,Tb927.9.17330
Tb427_000410500.1-p1-CDS1	Tb427_000410500.1	Chr6_3A_Tb427v10	Tb09.v4.0030	variant surface glycoprotein (VSG)	VSG	Trypanosomal VSG domain containing protein	0	0.0056	NA	0	0	1	1	0	0	0	1	0	0	0	0	0	0.11	0	0	Tb09.v4.0030,Tb10.v4.0125,Tb11.v5.0113,Tb11.v5.0933,Tb927.11.20010,Tb927.2.6380,Tb927.5.5090,Tb927.6.5640,Tb927.9.16460,Tb927.9.16550,Tb927.9.17470
Tb427_000554400.1-p1-CDS1	Tb427_000554400.1	Chr9_3A_Tb427v10	Tb09.v4.0030	variant surface glycoprotein (VSG)	VSG	Trypanosomal VSG domain containing protein	0	0.0056	NA	0	0	1	1	0	0	0	1	0	0	0	0	0	0.11	0	0	Tb09.v4.0030,Tb10.v4.0125,Tb11.v5.0113,Tb11.v5.0933,Tb927.11.20010,Tb927.2.6380,Tb927.5.5090,Tb927.6.5640,Tb927.9.16460,Tb927.9.16550,Tb927.9.17470
Tb427_000750900.1-p1-CDS1	Tb427_000750900.1	unitig_228_Tb427v10	Tb09.v4.0073	variant surface glycoprotein (VSG)	VSG	Trypanosomal VSG domain containing protein	1	0.0249	NA	0	1.27	1	1	0	0	0	1	0	1	0	0	0	0.11	0	0.14	Tb09.v4.0073,Tb11.v5.0857,Tb927.11.18310,Tb927.11.18490
Tb427_000298400.1-p1-CDS3	Tb427_000298400.1	Chr3_5A_Tb427v10	Tb10.v4.0065	variant surface glycoprotein (VSG)	VSG	hypothetical protein, conserved	0	0.0056	NA	0	0	1	1	0	0	0	1	0	0	0	0	0	0.11	0	0	Tb10.v4.0065,Tb10.v4.0191,Tb927.11.17160,Tb927.9.17420
Tb427_000395600.1-p1-CDS1	Tb427_000395600.1	Chr6_3A_Tb427v10	Tb10.v4.0095	variant surface glycoprotein (VSG)	VSG	hypothetical protein, conserved	0	0.0024	NA	0	0	1	1	1	0	0	1	0	0	0.03	0	0	0.11	0	0	Tb10.v4.0095,Tb11.0680,Tb11.v5.0134,Tb11.v5.0395,Tb11.v5.0755,Tb11.v5.0978,Tb927.11.17800,Tb927.11.18170,Tb927.11.18330,Tb927.11.18430,Tb927.11.18530,Tb927.3.190,Tb927.5.5440,Tb927.6.5440,Tb927.9.16520
Tb427_000334900.1-p1-CDS1	Tb427_000334900.1	Chr4_3A_Tb427v10	Tb10.v4.0095	variant surface glycoprotein (VSG)	VSG	hypothetical protein	0	0.0056	NA	0	0	37	37	0	0	0	1	0	0	0	0	0	0.11	0	0	Tb10.v4.0095,Tb11.0680,Tb11.v5.0134,Tb11.v5.0395,Tb11.v5.0755,Tb11.v5.0978,Tb927.11.17800,Tb927.11.18170,Tb927.11.18330,Tb927.11.18430,Tb927.11.18530,Tb927.3.190,Tb927.5.5440,Tb927.6.5440,Tb927.9.16520
Tb427_000534400.1-p1-CDS1	Tb427_000534400.1	Chr8_5B_Tb427v10	Tb10.v4.0095	variant surface glycoprotein (VSG)	VSG	hypothetical protein, conserved	0	0.0056	NA	0	0	1	1	0	0	0	1	0	0	0	0	0	0.11	0	0	Tb10.v4.0095,Tb11.0680,Tb11.v5.0134,Tb11.v5.0395,Tb11.v5.0755,Tb11.v5.0978,Tb927.11.17800,Tb927.11.18170,Tb927.11.18330,Tb927.11.18430,Tb927.11.18530,Tb927.3.190,Tb927.5.5440,Tb927.6.5440,Tb927.9.16520
Tb427_000384500.1-p1-CDS1	Tb427_000384500.1	Chr6_3A_Tb427v10	Tb10.v4.0095	variant surface glycoprotein (VSG)	VSG	hypothetical protein, conserved	1	0.0242	NA	0	1.18	1	1	0	0	0	1	1	0	0	0	0	0.11	0.13	0	Tb10.v4.0095,Tb11.0680,Tb11.v5.0134,Tb11.v5.0395,Tb11.v5.0755,Tb11.v5.0978,Tb927.11.17800,Tb927.11.18170,Tb927.11.18330,Tb927.11.18430,Tb927.11.18530,Tb927.3.190,Tb927.5.5440,Tb927.6.5440,Tb927.9.16520
Tb427_000476600.1-p1-CDS2	Tb427_000476600.1	Chr7_5A_Tb427v10	Tb11.v5.0934	variant surface glycoprotein (VSG)	VSG	hypothetical protein, conserved	0	0.0014	NA	0	0	1	1	0	1	0	1	0	0	0	0.04	0	0.11	0	0	Tb11.v5.0934,Tb927.5.5100
Tb427_000389700.1-p1-CDS1	Tb427_000389700.1	Chr6_3A_Tb427v10	Tb927.10.16490	variant surface glycoprotein (VSG)	VSG	Trypanosome variant surface glycoprotein (A-type)	0	0.0056	NA	0	0	1	1	0	0	0	1	0	0	0	0	0	0.11	0	0	Tb927.10.16490,Tb927.10.16500
Tb427_000800600.1-p1-CDS5	Tb427_000800600.1	unitig_262_Tb427v10	Tb927.11.18620	variant surface glycoprotein (VSG)	VSG	hypothetical protein, conserved	1	-0.0125	NA	0	0	8	8	3	1	0	1	0	0	0.09	0.04	0	0.11	0	0	Tb927.11.18620,Tb927.11.19850
Tb427_000338400.1-p1-CDS2	Tb427_000338400.1	Chr4_3B_Tb427v10	Tb927.11.18620	variant surface glycoprotein (VSG)	VSG	hypothetical protein, conserved	1	-0.0037	NA	0	0	21	21	0	2	0	1	0	0	0	0.07	0	0.11	0	0	Tb927.11.18620,Tb927.11.19850
Tb427_000491800.1-p1-CDS1	Tb427_000491800.1	Chr8_3A_Tb427v10	Tb927.11.18620	variant surface glycoprotein (VSG)	VSG	hypothetical protein, conserved	1	-0.0031	NA	0	0	13	13	1	1	0	1	0	0	0.03	0.04	0	0.11	0	0	Tb927.11.18620,Tb927.11.19850
Tb427_000575200.1-p1-CDS1	Tb427_000575200.1	Chr9_3A_Tb427v10	Tb927.11.18620	variant surface glycoprotein (VSG)	VSG	hypothetical protein, conserved	0	0.0014	NA	0	0	18	18	0	1	0	1	0	0	0	0.04	0	0.11	0	0	Tb927.11.18620,Tb927.11.19850
Tb427_000800600.1-p1-CDS12	Tb427_000800600.1	unitig_262_Tb427v10	Tb927.11.18620	variant surface glycoprotein (VSG)	VSG	hypothetical protein, conserved	1	0.008	NA	0	1.27	9	9	2	3	0	1	0	1	0.06	0.11	0	0.11	0	0.14	Tb927.11.18620,Tb927.11.19850
Tb427_000790300.1-p1-CDS1	Tb427_000790300.1	unitig_2534_Tb427v10	Tb927.11.18620	variant surface glycoprotein (VSG)	VSG	hypothetical protein, conserved	1	0.0242	NA	0	1.18	20	20	0	0	0	1	1	0	0	0	0	0.11	0.13	0	Tb927.11.18620,Tb927.11.19850
Tb427_000436400.1-p1-CDS1	Tb427_000436400.1	Chr6_3B_Tb427v10	Tb927.11.18620	variant surface glycoprotein (VSG)	VSG	hypothetical protein, conserved	1	0.055	NA	0	2.36	25	25	1	1	0	1	2	0	0.03	0.04	0	0.11	0.26	0	Tb927.11.18620,Tb927.11.19850
Tb427_000513900.1-p1-CDS1	Tb427_000513900.1	Chr8_5A_Tb427v10	Tb927.11.20550	variant surface glycoprotein (VSG)	VSG	hypothetical protein, conserved	0	0.0056	NA	0	0	1	1	0	0	0	1	0	0	0	0	0	0.11	0	0	Tb927.11.20550,Tb927.9.1180
Tb427_000513900.1-p1-CDS2	Tb427_000513900.1	Chr8_5A_Tb427v10	Tb927.11.20550	variant surface glycoprotein (VSG)	VSG	hypothetical protein, conserved	0	0.0056	NA	0	0	1	1	0	0	0	1	0	0	0	0	0	0.11	0	0	Tb927.11.20550,Tb927.9.1180
Tb427_000299000.1-p1-CDS1	Tb427_000299000.1	Chr3_5A_Tb427v10	Tb927.3.150	variant surface glycoprotein (VSG)	VSG	Trypanosomal VSG domain/Trypanosome variant surface glycoprotein C-terminal domain containing protein	0	0.0056	NA	0	0	1	1	0	0	0	1	0	0	0	0	0	0.11	0	0	Tb927.3.150
Tb427_000241500.1-p1-CDS1	Tb427_000241500.1	Chr1_3A_Tb427v10	Tb927.4.5560	variant surface glycoprotein (VSG)	VSG	Trypanosomal VSG domain/Trypanosome variant surface glycoprotein C-terminal domain containing protein	1	0.0174	NA	0	1.27	13	13	1	2	0	1	0	1	0.03	0.07	0	0.11	0	0.14	Tb927.4.5560
Tb427_000373200.1-p1-CDS1	Tb427_000373200.1	Chr5_3B_Tb427v10	Tb927.9.1250	variant surface glycoprotein (VSG)	VSG	Trypanosome variant surface glycoprotein (A-type)/Trypanosome variant surface glycoprotein C-terminal domain containing protein	0	0.0024	NA	0	0	1	1	1	0	0	1	0	0	0.03	0	0	0.11	0	0	Tb927.9.1250,Tb927.9.16390
Tb427_000220100.1-p1-CDS1	Tb427_000220100.1	Chr1_3A_Tb427v10	Tb11.v5.0312	variant surface protein	VSG	Trypanosome variant surface glycoprotein C-terminal domain containing protein	0	0.0014	NA	0	0	1	1	0	1	0	1	0	0	0	0.04	0	0.11	0	0	Tb11.v5.0312,Tb927.11.17490,Tb927.11.20130,Tb927.11.20300
Tb427_000441200.1-p1-CDS1	Tb427_000441200.1	Chr6_3B_Tb427v10	Tb11.v5.0312	variant surface protein	VSG	hypothetical protein	0	0.0014	NA	0	0	1	1	0	1	0	1	0	0	0	0.04	0	0.11	0	0	Tb11.v5.0312,Tb927.11.17490,Tb927.11.20130,Tb927.11.20300
Tb427_000441500.1-p1-CDS1	Tb427_000441500.1	Chr6_3B_Tb427v10	Tb05.5K5.380	VSG pseudogene	VSG	Trypanosome variant surface glycoprotein (A-type)/Trypanosome variant surface glycoprotein C-terminal domain containing protein	0	0.0014	NA	0	0	1	1	0	1	0	1	0	0	0	0.04	0	0.11	0	0	Tb05.5K5.380,Tb10.v4.0064,Tb10.v4.0096,Tb10.v4.0098,Tb10.v4.0140,Tb11.v5.0920,Tb11.v5.0931,Tb11.v5.0937,Tb11.v5.0941,Tb927.11.20500,Tb927.3.5860,Tb927.5.5000,Tb927.5.5150,Tb927.5.5400,Tb927.9.600
Tb427_000253200.1-p1-CDS1	Tb427_000253200.1	Chr1_3B_Tb427v10	Tb05.5K5.380	VSG pseudogene	VSG	Trypanosome variant surface glycoprotein (A-type)	0	0.0056	NA	0	0	1	1	0	0	0	1	0	0	0	0	0	0.11	0	0	Tb05.5K5.380,Tb10.v4.0064,Tb10.v4.0096,Tb10.v4.0098,Tb10.v4.0140,Tb11.v5.0920,Tb11.v5.0931,Tb11.v5.0937,Tb11.v5.0941,Tb927.11.20500,Tb927.3.5860,Tb927.5.5000,Tb927.5.5150,Tb927.5.5400,Tb927.9.600
Tb427_000598200.1-p1-CDS1	Tb427_000598200.1	Chr9_3A_Tb427v10	Tb05.5K5.380	VSG pseudogene	VSG	Trypanosome variant surface glycoprotein (A-type)/Trypanosome variant surface glycoprotein C-terminal domain containing protein	0	0.0056	NA	0	0	2	2	0	0	0	1	0	0	0	0	0	0.11	0	0	Tb05.5K5.380,Tb10.v4.0064,Tb10.v4.0096,Tb10.v4.0098,Tb10.v4.0140,Tb11.v5.0920,Tb11.v5.0931,Tb11.v5.0937,Tb11.v5.0941,Tb927.11.20500,Tb927.3.5860,Tb927.5.5000,Tb927.5.5150,Tb927.5.5400,Tb927.9.600
Tb427_000229800.1-p1-CDS1	Tb427_000229800.1	Chr1_3A_Tb427v10	Tb05.5K5.470	VSG pseudogene	VSG	Trypanosomal VSG domain/Trypanosome variant surface glycoprotein C-terminal domain containing protein	0	0.0056	NA	0	0	1	1	0	0	0	1	0	0	0	0	0	0.11	0	0	Tb05.5K5.470,Tb09.v4.0198,Tb10.v4.0182,Tb11.v5.0316,Tb11.v5.0376,Tb11.v5.0571,Tb11.v5.0908,Tb927.11.17650,Tb927.11.18090,Tb927.3.470,Tb927.8.380,Tb927.9.16570,Tb927.9.17090,Tb927.9.17490
Tb427_000266800.1-p1-CDS2	Tb427_000266800.1	Chr1_3B_Tb427v10	Tb05.5K5.470	VSG pseudogene	VSG	Trypanosomal VSG domain containing protein	0	0.0056	NA	0	0	1	1	0	0	0	1	0	0	0	0	0	0.11	0	0	Tb05.5K5.470,Tb09.v4.0198,Tb10.v4.0182,Tb11.v5.0316,Tb11.v5.0376,Tb11.v5.0571,Tb11.v5.0908,Tb927.11.17650,Tb927.11.18090,Tb927.3.470,Tb927.8.380,Tb927.9.16570,Tb927.9.17090,Tb927.9.17490
Tb427_000046600.1-p1-CDS1	Tb427_000046600.1	Chr10_3A_Tb427v10	Tb05.5K5.490	VSG pseudogene	VSG	Trypanosomal VSG domain/Trypanosome variant surface glycoprotein C-terminal domain containing protein	0	-0.0019	NA	0	0	2	2	2	0	0	1	0	0	0.06	0	0	0.11	0	0	Tb05.5K5.490,Tb08.27P2.710,Tb11.0950,Tb11.1460,Tb11.v5.0595,Tb927.11.17170,Tb927.11.18420,Tb927.11.18440,Tb927.11.18930,Tb927.9.17180,Tb927.9.270
Tb427_000293500.1-p1-CDS1	Tb427_000293500.1	Chr3_5A_Tb427v10	Tb05.5K5.490	VSG pseudogene	VSG	Trypanosomal VSG domain/Trypanosome variant surface glycoprotein C-terminal domain containing protein	0	0.0014	NA	0	0	1	1	0	1	0	1	0	0	0	0.04	0	0.11	0	0	Tb05.5K5.490,Tb08.27P2.710,Tb11.0950,Tb11.1460,Tb11.v5.0595,Tb927.11.17170,Tb927.11.18420,Tb927.11.18440,Tb927.11.18930,Tb927.9.17180,Tb927.9.270
Tb427_020033400.1-p1-CDS1	Tb427_020033400.1	Chr2_core_Tb427v10	Tb05.5K5.490	VSG pseudogene	VSG	Trypanosomal VSG domain containing protein	1	0.0525	NA	0	2.55	1	1	1	0	0	1	0	2	0.03	0	0	0.11	0	0.28	Tb05.5K5.490,Tb08.27P2.710,Tb11.0950,Tb11.1460,Tb11.v5.0595,Tb927.11.17170,Tb927.11.18420,Tb927.11.18440,Tb927.11.18930,Tb927.9.17180,Tb927.9.270
Tb427_000050200.1-p1-CDS1	Tb427_000050200.1	Chr10_3A_Tb427v10	Tb08.27P2.390	VSG pseudogene	VSG	Trypanosomal VSG domain containing protein	0	0.0024	NA	0	0	1	1	1	0	0	1	0	0	0.03	0	0	0.11	0	0	Tb08.27P2.390,Tb09.v4.0023,Tb09.v4.0091,Tb09.v4.0092,Tb09.v4.0102,Tb09.v4.0131,Tb09.v4.0180,Tb10.v4.0111,Tb10.v4.0198,Tb11.0190,Tb11.1580,Tb11.v5.0129,Tb11.v5.0335,Tb11.v5.0953,Tb11.v5.1018,Tb927.11.17290,Tb927.11.17720,Tb927.11.17770,Tb927.11.18260,Tb927.11.19570,Tb927.11.20190,Tb927.11.20350,Tb927.5.240,Tb927.5.5310,Tb927.5.5610,Tb927.9.16170,Tb927.9.17970
Tb427_000050200.1-p1-CDS2	Tb427_000050200.1	Chr10_3A_Tb427v10	Tb08.27P2.390	VSG pseudogene	VSG	Trypanosomal VSG domain containing protein	0	0.0056	NA	0	0	1	1	0	0	0	1	0	0	0	0	0	0.11	0	0	Tb08.27P2.390,Tb09.v4.0023,Tb09.v4.0091,Tb09.v4.0092,Tb09.v4.0102,Tb09.v4.0131,Tb09.v4.0180,Tb10.v4.0111,Tb10.v4.0198,Tb11.0190,Tb11.1580,Tb11.v5.0129,Tb11.v5.0335,Tb11.v5.0953,Tb11.v5.1018,Tb927.11.17290,Tb927.11.17720,Tb927.11.17770,Tb927.11.18260,Tb927.11.19570,Tb927.11.20190,Tb927.11.20350,Tb927.5.240,Tb927.5.5310,Tb927.5.5610,Tb927.9.16170,Tb927.9.17970
Tb427_000419600.1-p1-CDS1	Tb427_000419600.1	Chr6_3A_Tb427v10	Tb08.27P2.390	VSG pseudogene	VSG	Trypanosomal VSG domain/Trypanosome variant surface glycoprotein C-terminal domain containing protein	0	0.0056	NA	0	0	16	16	0	0	0	1	0	0	0	0	0	0.11	0	0	Tb08.27P2.390,Tb09.v4.0023,Tb09.v4.0091,Tb09.v4.0092,Tb09.v4.0102,Tb09.v4.0131,Tb09.v4.0180,Tb10.v4.0111,Tb10.v4.0198,Tb11.0190,Tb11.1580,Tb11.v5.0129,Tb11.v5.0335,Tb11.v5.0953,Tb11.v5.1018,Tb927.11.17290,Tb927.11.17720,Tb927.11.17770,Tb927.11.18260,Tb927.11.19570,Tb927.11.20190,Tb927.11.20350,Tb927.5.240,Tb927.5.5310,Tb927.5.5610,Tb927.9.16170,Tb927.9.17970
Tb427_000382700.1-p1-CDS2	Tb427_000382700.1	Chr6_3A_Tb427v10	Tb927.5.5490	Variant Surface Glycoprotein	VSG	hypothetical protein, conserved	1	-0.0089	NA	0	0	1	2	0	1	0	2	0	0	0	0.04	0	0.23	0	0	Tb927.5.5490
Tb427_000483000.1-p1-CDS3	Tb427_000483000.1	Chr7_5A_Tb427v10	Tb08.27P2.670	variant surface glycoprotein (VSG, atypical)	VSG	Trypanosomal VSG domain containing protein	1	-0.0027	NA	0	0	1	2	0	0	0	2	0	0	0	0	0	0.23	0	0	Tb08.27P2.670,Tb09.v4.0037,Tb09.v4.0075,Tb09.v4.0183,Tb10.v4.0086,Tb10.v4.0152,Tb10.v4.0166,Tb10.v4.0175,Tb11.0250,Tb11.1560,Tb11.v5.0139,Tb11.v5.0829,Tb11.v5.0939,Tb11.v5.0943,Tb927.11.17090,Tb927.11.17540,Tb927.11.18470,Tb927.11.18550,Tb927.11.20080,Tb927.4.5640,Tb927.5.5130,Tb927.5.5170,Tb927.6.5330,Tb927.6.5600,Tb927.9.17950,Tb927.9.250
Tb427_000490900.1-p1-CDS1	Tb427_000490900.1	Chr8_3A_Tb427v10	Tb08.27P2.670	variant surface glycoprotein (VSG, atypical)	VSG	Trypanosomal VSG domain containing protein	1	-0.0016	NA	0	0.61	2	4	0	4	0	2	0	1	0	0.14	0	0.23	0	0.14	Tb08.27P2.670,Tb09.v4.0037,Tb09.v4.0075,Tb09.v4.0183,Tb10.v4.0086,Tb10.v4.0152,Tb10.v4.0166,Tb10.v4.0175,Tb11.0250,Tb11.1560,Tb11.v5.0139,Tb11.v5.0829,Tb11.v5.0939,Tb11.v5.0943,Tb927.11.17090,Tb927.11.17540,Tb927.11.18470,Tb927.11.18550,Tb927.11.20080,Tb927.4.5640,Tb927.5.5130,Tb927.5.5170,Tb927.6.5330,Tb927.6.5600,Tb927.9.17950,Tb927.9.250
Tb427_000288700.1-p1-CDS4	Tb427_000288700.1	Chr3_5A_Tb427v10	Tb08.27P2.670	variant surface glycoprotein (VSG, atypical)	VSG	hypothetical protein, conserved	1	0.0102	NA	0	0.61	1	2	0	0	0	2	0	1	0	0	0	0.23	0	0.14	Tb08.27P2.670,Tb09.v4.0037,Tb09.v4.0075,Tb09.v4.0183,Tb10.v4.0086,Tb10.v4.0152,Tb10.v4.0166,Tb10.v4.0175,Tb11.0250,Tb11.1560,Tb11.v5.0139,Tb11.v5.0829,Tb11.v5.0939,Tb11.v5.0943,Tb927.11.17090,Tb927.11.17540,Tb927.11.18470,Tb927.11.18550,Tb927.11.20080,Tb927.4.5640,Tb927.5.5130,Tb927.5.5170,Tb927.6.5330,Tb927.6.5600,Tb927.9.17950,Tb927.9.250
Tb427_000299500.1-p1-CDS3	Tb427_000299500.1	Chr3_5A_Tb427v10	Tb10.v4.0065	variant surface glycoprotein (VSG)	VSG	hypothetical protein, conserved	2	0.0669	NA	0	1.74	1494.5	2989	1	0	0	2	2	1	0.03	0	0	0.23	0.26	0.14	Tb10.v4.0065,Tb10.v4.0191,Tb927.11.17160,Tb927.9.17420
Tb427_000299500.1-p1-CDS4	Tb427_000299500.1	Chr3_5A_Tb427v10	Tb10.v4.0065	variant surface glycoprotein (VSG)	VSG	hypothetical protein, conserved	2	0.0669	NA	0	1.74	1554	3108	1	0	0	2	2	1	0.03	0	0	0.23	0.26	0.14	Tb10.v4.0065,Tb10.v4.0191,Tb927.11.17160,Tb927.9.17420
Tb427_000299500.1-p1-CDS5	Tb427_000299500.1	Chr3_5A_Tb427v10	Tb10.v4.0065	variant surface glycoprotein (VSG)	VSG	hypothetical protein, conserved	2	0.0669	NA	0	1.74	1554	3108	1	0	0	2	2	1	0.03	0	0	0.23	0.26	0.14	Tb10.v4.0065,Tb10.v4.0191,Tb927.11.17160,Tb927.9.17420
Tb427_000603500.1-p1-CDS2	Tb427_000603500.1	Chr9_3B_Tb427v10	Tb927.11.18620	variant surface glycoprotein (VSG)	VSG	hypothetical protein, conserved	2	-0.0071	NA	0	0.57	15.5	31	3	3	0	2	1	0	0.09	0.11	0	0.23	0.13	0	Tb927.11.18620,Tb927.11.19850
Tb427_000513200.1-p1-CDS1	Tb427_000513200.1	Chr8_5A_Tb427v10	Tb927.11.18620	variant surface glycoprotein (VSG)	VSG	hypothetical protein, conserved	1	0.0101	NA	0	0.57	9.5	19	1	0	0	2	1	0	0.03	0	0	0.23	0.13	0	Tb927.11.18620,Tb927.11.19850
Tb427_000152900.1-p1-CDS1	Tb427_000152900.1	Chr11_3B_Tb427v10	Tb08.27P2.165	VSG pseudogene	VSG	Trypanosome variant surface glycoprotein (A-type)	1	-0.0027	NA	0	0	1	2	0	0	0	2	0	0	0	0	0	0.23	0	0	Tb08.27P2.165,Tb09.v4.0202,Tb10.v4.0174
Tb427_000076900.1-p1-CDS1	Tb427_000076900.1	Chr10_3B_Tb427v10	Tb08.27P2.390	VSG pseudogene	VSG	Trypanosomal VSG domain/Trypanosome variant surface glycoprotein C-terminal domain containing protein	1	0.0102	NA	0	0.61	1	2	0	0	0	2	0	1	0	0	0	0.23	0	0.14	Tb08.27P2.390,Tb09.v4.0023,Tb09.v4.0091,Tb09.v4.0092,Tb09.v4.0102,Tb09.v4.0131,Tb09.v4.0180,Tb10.v4.0111,Tb10.v4.0198,Tb11.0190,Tb11.1580,Tb11.v5.0129,Tb11.v5.0335,Tb11.v5.0953,Tb11.v5.1018,Tb927.11.17290,Tb927.11.17720,Tb927.11.17770,Tb927.11.18260,Tb927.11.19570,Tb927.11.20190,Tb927.11.20350,Tb927.5.240,Tb927.5.5310,Tb927.5.5610,Tb927.9.16170,Tb927.9.17970
Tb427_000641200.1-p1-CDS2	Tb427_000641200.1	unitig_168_Tb427v10	Tb927.11.17840	retrotransposon hot spot protein (RHS, pseudogene)	RHS	Retrotransposon hot spot protein	11	-0.032	NA	0	0.99	#DIV/0!	17	37	30	44	0	4	5	1.08	1.08	1.24	0	0.52	0.71	Tb927.11.17840,Tb927.2.720,Tb927.2.980,Tb927.4.190,Tb927.5.160
Tb427_000730400.1-p1-CDS4	Tb427_000730400.1	unitig_2196_Tb427v10	Tb927.1.3750	hypothetical protein, conserved	ZUnknown	hypothetical protein	4	-0.115	NA	0	0	#DIV/0!	9	7	11	45	0	0	0	0.2	0.39	1.27	0	0	0	Tb927.1.3750,Tb927.2.1470,Tb927.3.3430,Tb927.7.6870,Tb927.9.17690
Tb427_000664100.1-p1-CDS3	Tb427_000664100.1	unitig_1878_Tb427v10	Tb927.1.3750	hypothetical protein, conserved	ZUnknown	hypothetical protein	4	-0.128	NA	0	0	34	34	6	8	44	1	0	0	0.17	0.29	1.24	0.11	0	0	Tb927.1.3750,Tb927.2.1470,Tb927.3.3430,Tb927.7.6870,Tb927.9.17690
Tb427_000023300.1-p1-CDS2	Tb427_000023300.1	BES5_Tb427v10	Tb05.5K5.350	ESAG3 pseudogene	ESAG.pseudo	hypothetical protein, conserved	17	0.3414	NA	0	2.14	626	1252	25	23	44	2	10	13	0.73	0.83	1.24	0.23	1.29	1.85	Tb05.5K5.350,Tb05.5K5.420,Tb05.5K5.500,Tb08.27P2.160,Tb08.27P2.250,Tb08.27P2.330,Tb08.27P2.400,Tb08.27P2.520,Tb09.v4.0024,Tb09.v4.0027,Tb09.v4.0033,Tb09.v4.0045,Tb09.v4.0062,Tb09.v4.0083,Tb09.v4.0100,Tb09.v4.0115,Tb09.v4.0130,Tb09.v4.0132,Tb09.v4.0154,Tb09.v4.0160,Tb09.v4.0172,Tb09.v4.0181,Tb09.v4.0201,Tb09.v4.0206,Tb10.v4.0057,Tb10.v4.0066,Tb10.v4.0074,Tb10.v4.0090,Tb10.v4.0101,Tb10.v4.0137,Tb10…
Tb427_000822600.1-p1-CDS1	Tb427_000822600.1	unitig_307_Tb427v10	Tb927.1.275	ESAG4 pseudogene	ESAG.pseudo	hypothetical protein, conserved	14	0.012	NA	0	1.18	84.5	169	51	29	44	2	9	4	1.48	1.04	1.24	0.23	1.16	0.57	Tb927.1.275,Tb927.2.1260,Tb927.4.130,Tb927.6.100
Tb427_000711600.1-p1-CDS4	Tb427_000711600.1	unitig_2119_Tb427v10	Tb927.2.300	DNA-directed RNA polymerase, pseudogene	Pseudogene	RNA polymerase Rpb2, domain 4/RNA polymerase Rpb2, domain 6	11	-0.0233	NA	0	0.84	27.5	55	32	21	44	2	4	5	0.93	0.75	1.24	0.23	0.52	0.71	Tb927.2.300,Tb927.2.420,Tb927.2.460,Tb927.2.540,Tb927.4.230,Tb927.6.5190
Tb427_000665700.1-p1-CDS8	Tb427_000665700.1	unitig_1879_Tb427v10	Tb11.v5.1020	retrotransposon hot spot (RHS) protein	RHS	hypothetical protein, conserved	11	-0.1176	NA	0	0.57	59.5	119	33	27	44	2	1	5	0.96	0.97	1.24	0.23	0.13	0.71	Tb11.v5.1020,Tb927.1.240,Tb927.1.500,Tb927.10.16200,Tb927.11.18610,Tb927.11.18630
Tb427_000744400.1-p1-CDS2	Tb427_000744400.1	unitig_2229_Tb427v10	Tb10.v4.0215	hypothetical protein	ZUnknown	hypothetical protein, conserved	14	-0.1978	NA	0	0.57	39.5	79	71	42	44	2	1	5	2.06	1.51	1.24	0.23	0.13	0.71	Tb10.v4.0215,Tb927.9.15820
Tb427_000648800.1-p1-CDS2	Tb427_000648800.1	unitig_1842_Tb427v10	Tb927.1.280	Protein of unknown function (DUF1181)	ZUnknown	Protein of unknown function (DUF1181)	12	0.0891	NA	0	1.16	90	90	26	18	49	1	9	4	0.76	0.65	1.38	0.11	1.16	0.57	Tb927.1.280,Tb927.1.380,Tb927.1.470,Tb927.2.160,Tb927.2.680,Tb927.2.940,Tb927.4.150,Tb927.6.120,Tb927.7.7550
Tb427_060006000.1-p1-CDS2	Tb427_060006000.1	Chr6_core_Tb427v10	Tb05.5K5.250	hypothetical protein	ZUnknown	hypothetical protein, conserved	12	-0.0076	NA	0	0.93	42	84	39	20	45	2	3	7	1.13	0.72	1.27	0.23	0.39	1	Tb05.5K5.250
Tb427_010026300.1-p1-CDS2	Tb427_010026300.1	Chr1_core_Tb427v10	Tb927.1.3750	hypothetical protein, conserved	ZUnknown	hypothetical protein, conserved	7	-0.1663	NA	0	0.09	#DIV/0!	18	18	27	54	0	0	1	0.52	0.97	1.52	0	0	0.14	Tb927.1.3750,Tb927.2.1470,Tb927.3.3430,Tb927.7.6870,Tb927.9.17690
Tb427_000660800.1-p1-CDS2	Tb427_000660800.1	unitig_1859_Tb427v10	Tb927.2.300	DNA-directed RNA polymerase, pseudogene	Pseudogene	RNA polymerase Rpb2, domain 4	15	0.021	NA	0	1.23	106.5	213	53	32	46	2	8	6	1.54	1.15	1.3	0.23	1.03	0.85	Tb927.2.300,Tb927.2.420,Tb927.2.460,Tb927.2.540,Tb927.4.230,Tb927.6.5190
Tb427_000779600.1-p1-CDS3	Tb427_000779600.1	unitig_2481_Tb427v10	Tb11.v5.0800	retrotransposon hot spot (RHS) protein	RHS	Retrotransposon hot spot protein	13	-0.0776	NA	0	0.8	25	50	38	33	46	2	4	5	1.11	1.18	1.3	0.23	0.52	0.71	Tb11.v5.0800,Tb927.2.1100
Tb427_070075700.1-p1-CDS5	Tb427_070075700.1	Chr7_core_Tb427v10	Tb11.v5.1020	retrotransposon hot spot (RHS) protein	RHS	hypothetical protein, conserved	8	-0.0713	NA	0	0.44	37	74	12	17	46	2	3	2	0.35	0.61	1.3	0.23	0.39	0.28	Tb11.v5.1020,Tb927.1.240,Tb927.1.500,Tb927.10.16200,Tb927.11.18610,Tb927.11.18630
Tb427_000833600.1-p1-CDS5	Tb427_000833600.1	unitig_395_Tb427v10	Tb05.5K5.350	ESAG3 pseudogene	ESAG.pseudo	hypothetical protein, conserved	13	-0.0184	NA	0	0.92	284	568	30	37	47	2	9	2	0.87	1.33	1.33	0.23	1.16	0.28	Tb05.5K5.350,Tb05.5K5.420,Tb05.5K5.500,Tb08.27P2.160,Tb08.27P2.250,Tb08.27P2.330,Tb08.27P2.400,Tb08.27P2.520,Tb09.v4.0024,Tb09.v4.0027,Tb09.v4.0033,Tb09.v4.0045,Tb09.v4.0062,Tb09.v4.0083,Tb09.v4.0100,Tb09.v4.0115,Tb09.v4.0130,Tb09.v4.0132,Tb09.v4.0154,Tb09.v4.0160,Tb09.v4.0172,Tb09.v4.0181,Tb09.v4.0201,Tb09.v4.0206,Tb10.v4.0057,Tb10.v4.0066,Tb10.v4.0074,Tb10.v4.0090,Tb10.v4.0101,Tb10.v4.0137,Tb10…
Tb427_000269200.1-p1-CDS3	Tb427_000269200.1	Chr1_5A_Tb427v10	Tb10.v4.0215	hypothetical protein	ZUnknown	hypothetical protein, conserved	15	0.0305	NA	0	1.21	53.5	107	38	40	47	2	8	6	1.11	1.44	1.33	0.23	1.03	0.85	Tb10.v4.0215,Tb927.9.15820
Tb427_000679800.1-p1-CDS4	Tb427_000679800.1	unitig_190_Tb427v10	Tb10.v4.0215	hypothetical protein	ZUnknown	hypothetical protein, conserved	19	0.1204	NA	0	1.75	200	400	48	50	47	2	9	11	1.4	1.8	1.33	0.23	1.16	1.57	Tb10.v4.0215,Tb927.9.15820
Tb427_000819700.1-p1-CDS4	Tb427_000819700.1	unitig_303_Tb427v10	Tb10.v4.0215	hypothetical protein	ZUnknown	hypothetical protein, conserved	15	-0.1907	NA	0	0.69	22.33	67	57	50	44	3	4	4	1.66	1.8	1.24	0.34	0.52	0.57	Tb10.v4.0215,Tb927.9.15820
Tb427_000647500.1-p1-CDS4	Tb427_000647500.1	unitig_1841_Tb427v10	Tb10.v4.0215	hypothetical protein	ZUnknown	hypothetical protein, conserved	14	-0.0562	NA	0	0.93	91.33	274	40	40	44	3	7	4	1.16	1.44	1.24	0.34	0.9	0.57	Tb10.v4.0215,Tb927.9.15820
Tb427_000793600.1-p1-CDS1	Tb427_000793600.1	unitig_2569_Tb427v10	Tb927.1.280	Protein of unknown function (DUF1181)	ZUnknown	Protein of unknown function (DUF1181)	12	0.0464	NA	0	0.94	25.33	76	27	18	44	3	5	6	0.79	0.65	1.24	0.34	0.64	0.85	Tb927.1.280,Tb927.1.380,Tb927.1.470,Tb927.2.160,Tb927.2.680,Tb927.2.940,Tb927.4.150,Tb927.6.120,Tb927.7.7550
Tb427_000812100.1-p1-CDS1	Tb427_000812100.1	unitig_2969_Tb427v10	Tb11.v5.0655	trypanosome RHS family	ZUnknown	Endonuclease-reverse transcriptase	15	0.1364	NA	0	1.38	52	156	31	30	44	3	7	9	0.9	1.08	1.24	0.34	0.9	1.28	Tb11.v5.0655,Tb927.1.430,Tb927.1.450,Tb927.2.1140,Tb927.2.830,Tb927.4.110
Tb427_000695100.1-p1-CDS1	Tb427_000695100.1	unitig_1973_Tb427v10	Tb10.v4.0215	hypothetical protein	ZUnknown	hypothetical protein, conserved	16	-0.039	NA	0	1.08	69.67	209	58	38	45	3	8	5	1.69	1.36	1.27	0.34	1.03	0.71	Tb10.v4.0215,Tb927.9.15820
Tb427_000579800.1-p1-CDS1	Tb427_000579800.1	Chr9_3A_Tb427v10	Tb09.v4.0042	leucine-rich repeat protein LRRP, pseudogene	LRRP	hypothetical protein	16	0.1092	NA	0	1.38	70.5	141	34	36	50	2	12	5	0.99	1.29	1.41	0.23	1.55	0.71	Tb09.v4.0042,Tb09.v4.0104
Tb427_000369200.1-p1-CDS1	Tb427_000369200.1	Chr5_3B_Tb427v10	Tb09.v4.0065	ESAG1	ESAG	ESAG protein	9	-0.2232	NA	0	0.25	37.33	112	37	20	46	3	1	2	1.08	0.72	1.3	0.34	0.13	0.28	Tb09.v4.0065,Tb10.v4.0213,Tb10.v4.0218,Tb11.1020,Tb927.1.5200,Tb927.1.5240,Tb927.10.20,Tb927.11.17890,Tb927.11.18650,Tb927.4.1200,Tb927.9.660,Tb927.9.7350
Tb427_000431700.1-p1-CDS6	Tb427_000431700.1	Chr6_3B_Tb427v10	Tb05.5K5.350	ESAG3 pseudogene	ESAG.pseudo	hypothetical protein, conserved	15	0.0062	NA	0	1.06	220.67	662	48	29	46	3	8	5	1.4	1.04	1.3	0.34	1.03	0.71	Tb05.5K5.350,Tb05.5K5.420,Tb05.5K5.500,Tb08.27P2.160,Tb08.27P2.250,Tb08.27P2.330,Tb08.27P2.400,Tb08.27P2.520,Tb09.v4.0024,Tb09.v4.0027,Tb09.v4.0033,Tb09.v4.0045,Tb09.v4.0062,Tb09.v4.0083,Tb09.v4.0100,Tb09.v4.0115,Tb09.v4.0130,Tb09.v4.0132,Tb09.v4.0154,Tb09.v4.0160,Tb09.v4.0172,Tb09.v4.0181,Tb09.v4.0201,Tb09.v4.0206,Tb10.v4.0057,Tb10.v4.0066,Tb10.v4.0074,Tb10.v4.0090,Tb10.v4.0101,Tb10.v4.0137,Tb10…
Tb427_000544700.1-p1-CDS3	Tb427_000544700.1	Chr8_5B_Tb427v10	Tb05.5K5.180	GRESAG 4 receptor-type adenylate cyclase	GRESAG	Adenylate and Guanylate cyclase catalytic domain containing protein	20	-0.0296	NA	0	1.32	42	126	80	47	46	3	9	7	2.33	1.69	1.3	0.34	1.16	1	Tb05.5K5.180,Tb05.5K5.190,Tb09.v4.0009,Tb11.v5.0209,Tb11.v5.0217,Tb11.v5.0281,Tb11.v5.0379,Tb11.v5.0380,Tb11.v5.0424,Tb11.v5.0425,Tb11.v5.0429,Tb11.v5.0431,Tb11.v5.0456,Tb11.v5.0470,Tb11.v5.0484,Tb11.v5.0546,Tb11.v5.0576,Tb11.v5.0654,Tb11.v5.0784,Tb11.v5.0821,Tb11.v5.0830,Tb11.v5.0864,Tb11.v5.0865,Tb11.v5.1015,Tb11.v5.1016,Tb927.10.13040,Tb927.10.16000,Tb927.10.16190,Tb927.10.2430,Tb927.11.13740,…
Tb427_000746400.1-p1-CDS1	Tb427_000746400.1	unitig_2231_Tb427v10	Tb05.5K5.180	GRESAG 4 receptor-type adenylate cyclase	GRESAG	Adenylate and Guanylate cyclase catalytic domain containing protein	13	0.0206	NA	0	0.97	38.33	115	28	31	46	3	9	3	0.81	1.11	1.3	0.34	1.16	0.43	Tb05.5K5.180,Tb05.5K5.190,Tb09.v4.0009,Tb11.v5.0209,Tb11.v5.0217,Tb11.v5.0281,Tb11.v5.0379,Tb11.v5.0380,Tb11.v5.0424,Tb11.v5.0425,Tb11.v5.0429,Tb11.v5.0431,Tb11.v5.0456,Tb11.v5.0470,Tb11.v5.0484,Tb11.v5.0546,Tb11.v5.0576,Tb11.v5.0654,Tb11.v5.0784,Tb11.v5.0821,Tb11.v5.0830,Tb11.v5.0864,Tb11.v5.0865,Tb11.v5.1015,Tb11.v5.1016,Tb927.10.13040,Tb927.10.16000,Tb927.10.16190,Tb927.10.2430,Tb927.11.13740,…
Tb427_000635200.1-p1-CDS4	Tb427_000635200.1	unitig_148_Tb427v10	Tb09.v4.0013	retrotransposon hot spot (RHS) protein	RHS	Retrotransposon hot spot protein	10	-0.1151	NA	0	0.51	44.67	134	32	21	46	3	1	5	0.93	0.75	1.3	0.34	0.13	0.71	Tb09.v4.0013,Tb09.v4.0067,Tb11.0820,Tb11.1780,Tb11.v5.0214,Tb11.v5.0294,Tb11.v5.0295,Tb11.v5.0325,Tb11.v5.0326,Tb11.v5.0353,Tb11.v5.0489,Tb11.v5.0532,Tb11.v5.0533,Tb11.v5.0594,Tb11.v5.0624,Tb11.v5.0670,Tb11.v5.0693,Tb11.v5.0839,Tb927.1.120,Tb927.1.180,Tb927.1.190,Tb927.1.220,Tb927.1.70,Tb927.1.90,Tb927.10.110,Tb927.10.70,Tb927.2.100,Tb927.2.1120,Tb927.2.1180,Tb927.2.1210,Tb927.2.270,Tb927.2.280,T…
Tb427_000793300.1-p1-CDS1	Tb427_000793300.1	unitig_2569_Tb427v10	Tb927.11.17840	retrotransposon hot spot protein (RHS, pseudogene)	RHS	Retrotransposon hot spot protein	14	0.0395	NA	0	1.09	112	336	30	34	46	3	5	8	0.87	1.22	1.3	0.34	0.64	1.14	Tb927.11.17840,Tb927.2.720,Tb927.2.980,Tb927.4.190,Tb927.5.160
Tb427_000737700.1-p1-CDS1	Tb427_000737700.1	unitig_2217_Tb427v10	Tb10.v4.0215	hypothetical protein	ZUnknown	hypothetical protein, conserved	11	-0.1445	NA	0	0.51	27.33	82	36	24	46	3	2	4	1.05	0.86	1.3	0.34	0.26	0.57	Tb10.v4.0215,Tb927.9.15820
Tb427_000772000.1-p1-CDS1	Tb427_000772000.1	unitig_2456_Tb427v10	Tb11.v5.0655	trypanosome RHS family	ZUnknown	Endonuclease-reverse transcriptase	16	-0.0844	NA	0	0.98	43	129	58	45	46	3	7	5	1.69	1.62	1.3	0.34	0.9	0.71	Tb11.v5.0655,Tb927.1.430,Tb927.1.450,Tb927.2.1140,Tb927.2.830,Tb927.4.110
Tb427_000666700.1-p1-CDS2	Tb427_000666700.1	unitig_1881_Tb427v10	Tb927.1.3750	hypothetical protein, conserved	ZUnknown	hypothetical protein, conserved	7	-0.0806	NA	0	0.24	#DIV/0!	17	14	8	59	0	2	1	0.41	0.29	1.67	0	0.26	0.14	Tb927.1.3750,Tb927.2.1470,Tb927.3.3430,Tb927.7.6870,Tb927.9.17690
Tb427_000731100.1-p1-CDS2	Tb427_000731100.1	unitig_2198_Tb427v10	Tb927.1.3750	hypothetical protein, conserved	ZUnknown	hypothetical protein	7	-0.2283	NA	0	0	8	16	20	16	51	2	0	0	0.58	0.57	1.44	0.23	0	0	Tb927.1.3750,Tb927.2.1470,Tb927.3.3430,Tb927.7.6870,Tb927.9.17690
Tb427_000678100.1-p1-CDS1	Tb427_000678100.1	unitig_1906_Tb427v10	Tb09.v4.0013	retrotransposon hot spot (RHS) protein	RHS	Retrotransposon hot spot protein	18	0.0551	NA	0	1.37	36	108	45	49	47	3	10	7	1.31	1.76	1.33	0.34	1.29	1	Tb09.v4.0013,Tb09.v4.0067,Tb11.0820,Tb11.1780,Tb11.v5.0214,Tb11.v5.0294,Tb11.v5.0295,Tb11.v5.0325,Tb11.v5.0326,Tb11.v5.0353,Tb11.v5.0489,Tb11.v5.0532,Tb11.v5.0533,Tb11.v5.0594,Tb11.v5.0624,Tb11.v5.0670,Tb11.v5.0693,Tb11.v5.0839,Tb927.1.120,Tb927.1.180,Tb927.1.190,Tb927.1.220,Tb927.1.70,Tb927.1.90,Tb927.10.110,Tb927.10.70,Tb927.2.100,Tb927.2.1120,Tb927.2.1180,Tb927.2.1210,Tb927.2.270,Tb927.2.280,T…
Tb427_000732800.1-p1-CDS1	Tb427_000732800.1	unitig_219_Tb427v10	Tb927.11.17840	retrotransposon hot spot protein (RHS, pseudogene)	RHS	Retrotransposon hot spot protein	16	0.1744	NA	0	1.47	21.67	65	31	31	47	3	8	10	0.9	1.11	1.33	0.34	1.03	1.42	Tb927.11.17840,Tb927.2.720,Tb927.2.980,Tb927.4.190,Tb927.5.160
Tb427_000288100.1-p1-CDS1	Tb427_000288100.1	Chr3_3A_Tb427v10	Tb927.9.780	hypothetical protein	ZUnknown	hypothetical protein, conserved	12	-0.1347	NA	0	0.56	28.5	114	31	30	44	4	4	3	0.9	1.08	1.24	0.45	0.52	0.43	Tb927.9.780
Tb427_000389200.1-p1-CDS7	Tb427_000389200.1	Chr6_3A_Tb427v10	Tb05.5K5.350	ESAG3 pseudogene	ESAG.pseudo	hypothetical protein	12	-0.2296	NA	0	0.39	115.75	463	36	36	45	4	3	2	1.05	1.29	1.27	0.45	0.39	0.28	Tb05.5K5.350,Tb05.5K5.420,Tb05.5K5.500,Tb08.27P2.160,Tb08.27P2.250,Tb08.27P2.330,Tb08.27P2.400,Tb08.27P2.520,Tb09.v4.0024,Tb09.v4.0027,Tb09.v4.0033,Tb09.v4.0045,Tb09.v4.0062,Tb09.v4.0083,Tb09.v4.0100,Tb09.v4.0115,Tb09.v4.0130,Tb09.v4.0132,Tb09.v4.0154,Tb09.v4.0160,Tb09.v4.0172,Tb09.v4.0181,Tb09.v4.0201,Tb09.v4.0206,Tb10.v4.0057,Tb10.v4.0066,Tb10.v4.0074,Tb10.v4.0090,Tb10.v4.0101,Tb10.v4.0137,Tb10…
Tb427_000740600.1-p1-CDS6	Tb427_000740600.1	unitig_2219_Tb427v10	Tb09.v4.0041	leucine-rich repeat protein LRRP, pseudogene	LRRP	Leucine Rich repeat	16	-0.1194	NA	0	0.86	21.5	86	64	40	45	4	6	5	1.86	1.44	1.27	0.45	0.77	0.71	Tb09.v4.0041,Tb11.v5.0448,Tb11.v5.0551,Tb11.v5.0560,Tb11.v5.0602,Tb11.v5.0703,Tb11.v5.0838,Tb927.1.290,Tb927.1.370,Tb927.1.480,Tb927.11.1500,Tb927.11.1510,Tb927.2.1310,Tb927.2.170,Tb927.2.690,Tb927.2.950,Tb927.3.1490,Tb927.4.160,Tb927.6.130,Tb927.7.7540,Tb927.9.14540
Tb427_090010100.1-p1-CDS1	Tb427_090010100.1	Chr9_core_Tb427v10	Tb09.v4.0136	variant surface glycoprotein (VSG, atypical)	VSG	Trypanosome variant surface glycoprotein (A-type)	11	-0.19	NA	0	0.38	1.75	7	46	20	45	4	4	1	1.34	0.72	1.27	0.45	0.52	0.14	Tb09.v4.0136,Tb09.v4.0196,Tb10.v4.0212,Tb11.0500,Tb11.1130,Tb11.v5.0599,Tb11.v5.0952,Tb927.11.17670,Tb927.11.18140,Tb927.11.19450,Tb927.11.20200,Tb927.3.280,Tb927.4.5670,Tb927.5.5300
Tb427_000258700.1-p1-CDS1	Tb427_000258700.1	Chr1_3B_Tb427v10	Tb05.5K5.260	variant surface glycoprotein (VSG)	VSG	Trypanosomal VSG domain containing protein	20	0.2133	NA	0	1.83	57.75	231	45	46	45	4	10	13	1.31	1.65	1.27	0.45	1.29	1.85	Tb05.5K5.260,Tb09.v4.0150,Tb927.1.5060,Tb927.11.17870,Tb927.5.110,Tb927.9.690
Tb427_000667700.1-p1-CDS2	Tb427_000667700.1	unitig_1881_Tb427v10	Tb927.1.3750	hypothetical protein, conserved	ZUnknown	hypothetical protein, conserved	9	-0.1369	NA	0	0.23	#DIV/0!	18	23	22	61	0	2	1	0.67	0.79	1.72	0	0.26	0.14	Tb927.1.3750,Tb927.2.1470,Tb927.3.3430,Tb927.7.6870,Tb927.9.17690
Tb427_000776000.1-p1-CDS2	Tb427_000776000.1	unitig_2474_Tb427v10	Tb927.1.3750	hypothetical protein, conserved	ZUnknown	hypothetical protein, conserved	9	-0.2012	NA	0	0.16	16	16	29	21	57	1	1	1	0.84	0.75	1.61	0.11	0.13	0.14	Tb927.1.3750,Tb927.2.1470,Tb927.3.3430,Tb927.7.6870,Tb927.9.17690
Tb427_000790200.1-p1-CDS4	Tb427_000790200.1	unitig_2534_Tb427v10	Tb09.v4.0013	retrotransposon hot spot (RHS) protein	RHS	Retrotransposon hot spot protein	13	-0.1565	NA	0	0.55	52.5	105	44	36	54	2	2	5	1.28	1.29	1.52	0.23	0.26	0.71	Tb09.v4.0013,Tb09.v4.0067,Tb11.0820,Tb11.1780,Tb11.v5.0214,Tb11.v5.0294,Tb11.v5.0295,Tb11.v5.0325,Tb11.v5.0326,Tb11.v5.0353,Tb11.v5.0489,Tb11.v5.0532,Tb11.v5.0533,Tb11.v5.0594,Tb11.v5.0624,Tb11.v5.0670,Tb11.v5.0693,Tb11.v5.0839,Tb927.1.120,Tb927.1.180,Tb927.1.190,Tb927.1.220,Tb927.1.70,Tb927.1.90,Tb927.10.110,Tb927.10.70,Tb927.2.100,Tb927.2.1120,Tb927.2.1180,Tb927.2.1210,Tb927.2.270,Tb927.2.280,T…
Tb427_030037000.1-p1-CDS3	Tb427_030037000.1	Chr3_core_Tb427v10	Tb11.v5.1020	retrotransposon hot spot (RHS) protein	RHS	hypothetical protein, conserved	13	-0.1458	NA	0	0.56	49.5	99	49	34	54	2	1	6	1.43	1.22	1.52	0.23	0.13	0.85	Tb11.v5.1020,Tb927.1.240,Tb927.1.500,Tb927.10.16200,Tb927.11.18610,Tb927.11.18630
Tb427_000652900.1-p1-CDS2	Tb427_000652900.1	unitig_1852_Tb427v10	Tb09.v4.0013	retrotransposon hot spot (RHS) protein	RHS	Retrotransposon hot spot protein	12	-0.0445	NA	0	0.69	24.33	73	20	31	50	3	5	4	0.58	1.11	1.41	0.34	0.64	0.57	Tb09.v4.0013,Tb09.v4.0067,Tb11.0820,Tb11.1780,Tb11.v5.0214,Tb11.v5.0294,Tb11.v5.0295,Tb11.v5.0325,Tb11.v5.0326,Tb11.v5.0353,Tb11.v5.0489,Tb11.v5.0532,Tb11.v5.0533,Tb11.v5.0594,Tb11.v5.0624,Tb11.v5.0670,Tb11.v5.0693,Tb11.v5.0839,Tb927.1.120,Tb927.1.180,Tb927.1.190,Tb927.1.220,Tb927.1.70,Tb927.1.90,Tb927.10.110,Tb927.10.70,Tb927.2.100,Tb927.2.1120,Tb927.2.1180,Tb927.2.1210,Tb927.2.270,Tb927.2.280,T…
Tb427_000650300.1-p1-CDS1	Tb427_000650300.1	unitig_1843_Tb427v10	Tb09.v4.0013	retrotransposon hot spot (RHS) protein	RHS	Retrotransposon hot spot protein	17	0.2296	NA	0	1.55	187.25	749	30	31	46	4	10	10	0.87	1.11	1.3	0.45	1.29	1.42	Tb09.v4.0013,Tb09.v4.0067,Tb11.0820,Tb11.1780,Tb11.v5.0214,Tb11.v5.0294,Tb11.v5.0295,Tb11.v5.0325,Tb11.v5.0326,Tb11.v5.0353,Tb11.v5.0489,Tb11.v5.0532,Tb11.v5.0533,Tb11.v5.0594,Tb11.v5.0624,Tb11.v5.0670,Tb11.v5.0693,Tb11.v5.0839,Tb927.1.120,Tb927.1.180,Tb927.1.190,Tb927.1.220,Tb927.1.70,Tb927.1.90,Tb927.10.110,Tb927.10.70,Tb927.2.100,Tb927.2.1120,Tb927.2.1180,Tb927.2.1210,Tb927.2.270,Tb927.2.280,T…
Tb427_070075500.1-p1-CDS2	Tb427_070075500.1	Chr7_core_Tb427v10	Tb927.1.3750	hypothetical protein, conserved	ZUnknown	hypothetical protein, conserved	8	-0.099	NA	0	0.3	18	18	28	10	58	1	4	0	0.81	0.36	1.64	0.11	0.52	0	Tb927.1.3750,Tb927.2.1470,Tb927.3.3430,Tb927.7.6870,Tb927.9.17690
Tb427_000697500.1-p1-CDS1	Tb427_000697500.1	unitig_1986_Tb427v10	Tb927.1.490	hypothetical protein	ZUnknown	hypothetical protein, conserved	18	0.0401	NA	0	1.24	60.5	242	46	44	46	4	8	8	1.34	1.58	1.3	0.45	1.03	1.14	Tb927.1.490,Tb927.4.180,Tb927.9.740
Tb427_000676000.1-p1-CDS1	Tb427_000676000.1	unitig_1902_Tb427v10	Tb927.1.490	hypothetical protein	ZUnknown	hypothetical protein, conserved	17	0.0794	NA	0	1.29	64.75	259	48	35	46	4	13	4	1.4	1.26	1.3	0.45	1.68	0.57	Tb927.1.490,Tb927.4.180,Tb927.9.740
Tb427_000372100.1-p1-CDS2	Tb427_000372100.1	Chr5_3B_Tb427v10	Tb927.5.296b	hypothetical protein, Zinc finger domain, MOP domain	ZUnknown	hypothetical protein, conserved	13	-0.0654	NA	0	0.77	66.5	266	34	33	46	4	6	4	0.99	1.18	1.3	0.45	0.77	0.57	Tb927.5.296b
Tb427_000831400.1-p1-CDS1	Tb427_000831400.1	unitig_348_Tb427v10	Tb11.v5.1020	retrotransposon hot spot (RHS) protein	RHS	Reverse transcriptase (RNA-dependent DNA polymerase)	18	-0.0362	NA	0	1.07	23.8	119	50	49	43	5	6	8	1.45	1.76	1.21	0.57	0.77	1.14	Tb11.v5.1020,Tb927.1.240,Tb927.1.500,Tb927.10.16200,Tb927.11.18610,Tb927.11.18630
Tb427_000776800.1-p1-CDS1	Tb427_000776800.1	unitig_2476_Tb427v10	Tb05.5K5.180	GRESAG 4 receptor-type adenylate cyclase	GRESAG	Adenylate and Guanylate cyclase catalytic domain containing protein	16	0.1456	NA	0	1.29	110.75	443	38	25	47	4	9	8	1.11	0.9	1.33	0.45	1.16	1.14	Tb05.5K5.180,Tb05.5K5.190,Tb09.v4.0009,Tb11.v5.0209,Tb11.v5.0217,Tb11.v5.0281,Tb11.v5.0379,Tb11.v5.0380,Tb11.v5.0424,Tb11.v5.0425,Tb11.v5.0429,Tb11.v5.0431,Tb11.v5.0456,Tb11.v5.0470,Tb11.v5.0484,Tb11.v5.0546,Tb11.v5.0576,Tb11.v5.0654,Tb11.v5.0784,Tb11.v5.0821,Tb11.v5.0830,Tb11.v5.0864,Tb11.v5.0865,Tb11.v5.1015,Tb11.v5.1016,Tb927.10.13040,Tb927.10.16000,Tb927.10.16190,Tb927.10.2430,Tb927.11.13740,…
Tb427_000759200.1-p1-CDS2	Tb427_000759200.1	unitig_2335_Tb427v10	Tb927.2.1060	retrotransposon hot spot protein (RHS1, pseudogene)	RHS	Retrotransposon hot spot protein	14	-0.2352	NA	0	0.46	23	69	47	45	51	3	3	3	1.37	1.62	1.44	0.34	0.39	0.43	Tb927.2.1060,Tb927.2.1160,Tb927.2.220
Tb427_000700700.1-p1-CDS2	Tb427_000700700.1	unitig_2014_Tb427v10	Tb10.v4.0215	hypothetical protein	ZUnknown	hypothetical protein, conserved	15	-0.2086	NA	0	0.6	23.75	95	64	41	47	4	5	3	1.86	1.47	1.33	0.45	0.64	0.43	Tb10.v4.0215,Tb927.9.15820
Tb427_000703800.1-p1-CDS1	Tb427_000703800.1	unitig_2078_Tb427v10	Tb10.v4.0215	hypothetical protein	ZUnknown	hypothetical protein, conserved	14	-0.0282	NA	0	0.87	17.75	71	47	26	47	4	1	10	1.37	0.93	1.33	0.45	0.13	1.42	Tb10.v4.0215,Tb927.9.15820
Tb427_000646700.1-p1-CDS2	Tb427_000646700.1	unitig_1840_Tb427v10	Tb10.v4.0215	hypothetical protein	ZUnknown	hypothetical protein, conserved	16	0.0046	NA	0	1.07	67.75	271	63	24	47	4	7	7	1.83	0.86	1.33	0.45	0.9	1	Tb10.v4.0215,Tb927.9.15820
Tb427_000839800.1-p1-CDS1	Tb427_000839800.1	unitig_52_Tb427v10	Tb927.2.300	DNA-directed RNA polymerase, pseudogene	Pseudogene	RNA polymerase Rpb2, domain 4	12	-0.164	NA	0	0.51	44.25	177	41	29	48	4	5	2	1.19	1.04	1.36	0.45	0.64	0.28	Tb927.2.300,Tb927.2.420,Tb927.2.460,Tb927.2.540,Tb927.4.230,Tb927.6.5190
Tb427_000017000.1-p1-CDS1	Tb427_000017000.1	BES2_Tb427v10	Tb07.30D13.110	hypothetical protein, conserved (pseudogene)	Pseudogene	hypothetical protein, conserved	15	0.0136	NA	0	0.98	76.75	307	52	20	48	4	6	7	1.51	0.72	1.36	0.45	0.77	1	Tb07.30D13.110,Tb07.30D13.160,Tb07.30D13.60
Tb427_000268500.1-p1-CDS1	Tb427_000268500.1	Chr1_3B_Tb427v10	Tb11.v5.1020	retrotransposon hot spot (RHS) protein	RHS	hypothetical protein, conserved	16	0.0441	NA	0	1.12	63	126	46	30	56	2	8	7	1.34	1.08	1.58	0.23	1.03	1	Tb11.v5.1020,Tb927.1.240,Tb927.1.500,Tb927.10.16200,Tb927.11.18610,Tb927.11.18630
Tb427_000678100.1-p1-CDS4	Tb427_000678100.1	unitig_1906_Tb427v10	Tb09.v4.0013	retrotransposon hot spot (RHS) protein	RHS	Retrotransposon hot spot protein	16	-0.0956	NA	0	0.84	29.75	119	59	34	48	4	4	7	1.72	1.22	1.36	0.45	0.52	1	Tb09.v4.0013,Tb09.v4.0067,Tb11.0820,Tb11.1780,Tb11.v5.0214,Tb11.v5.0294,Tb11.v5.0295,Tb11.v5.0325,Tb11.v5.0326,Tb11.v5.0353,Tb11.v5.0489,Tb11.v5.0532,Tb11.v5.0533,Tb11.v5.0594,Tb11.v5.0624,Tb11.v5.0670,Tb11.v5.0693,Tb11.v5.0839,Tb927.1.120,Tb927.1.180,Tb927.1.190,Tb927.1.220,Tb927.1.70,Tb927.1.90,Tb927.10.110,Tb927.10.70,Tb927.2.100,Tb927.2.1120,Tb927.2.1180,Tb927.2.1210,Tb927.2.270,Tb927.2.280,T…
Tb427_000646900.1-p1-CDS3	Tb427_000646900.1	unitig_1840_Tb427v10	Tb09.v4.0013	retrotransposon hot spot (RHS) protein	RHS	Retrotransposon hot spot protein	14	-0.2021	NA	0	0.52	40.4	202	53	31	44	5	4	3	1.54	1.11	1.24	0.57	0.52	0.43	Tb09.v4.0013,Tb09.v4.0067,Tb11.0820,Tb11.1780,Tb11.v5.0214,Tb11.v5.0294,Tb11.v5.0295,Tb11.v5.0325,Tb11.v5.0326,Tb11.v5.0353,Tb11.v5.0489,Tb11.v5.0532,Tb11.v5.0533,Tb11.v5.0594,Tb11.v5.0624,Tb11.v5.0670,Tb11.v5.0693,Tb11.v5.0839,Tb927.1.120,Tb927.1.180,Tb927.1.190,Tb927.1.220,Tb927.1.70,Tb927.1.90,Tb927.10.110,Tb927.10.70,Tb927.2.100,Tb927.2.1120,Tb927.2.1180,Tb927.2.1210,Tb927.2.270,Tb927.2.280,T…
Tb427_000515900.1-p1-CDS2	Tb427_000515900.1	Chr8_5A_Tb427v10	Tb11.v5.0985	variant surface glycoprotein (VSG)-related	VSG	Trypanosomal VSG domain containing protein	13	-0.0659	NA	0	0.73	4.25	17	46	23	48	4	7	3	1.34	0.83	1.36	0.45	0.9	0.43	Tb11.v5.0985,Tb927.5.130
Tb427_000736600.1-p1-CDS1	Tb427_000736600.1	unitig_2217_Tb427v10	Tb10.v4.0215	hypothetical protein	ZUnknown	hypothetical protein, conserved	17	-0.1331	NA	0	0.82	71.67	215	56	52	52	3	6	5	1.63	1.87	1.47	0.34	0.77	0.71	Tb10.v4.0215,Tb927.9.15820
Tb427_000652000.1-p1-CDS5	Tb427_000652000.1	unitig_1852_Tb427v10	Tb927.1.275	ESAG4 pseudogene	ESAG.pseudo	hypothetical protein, conserved	16	0.0075	NA	0	1.02	66.25	265	49	31	49	4	10	4	1.43	1.11	1.38	0.45	1.29	0.57	Tb927.1.275,Tb927.2.1260,Tb927.4.130,Tb927.6.100
Tb427_000486400.1-p1-CDS1	Tb427_000486400.1	Chr8_3A_Tb427v10	Tb05.5K5.340	VSG pseudogene,variant surface glycoprotein, degenerate	VSG	Trypanosomal VSG domain containing protein	8	-0.1192	NA	0	0.29	1	4	14	14	49	4	3	1	0.41	0.5	1.38	0.45	0.39	0.14	Tb05.5K5.340,Tb08.27P2.140,Tb08.27P2.150,Tb08.27P2.310,Tb08.27P2.565,Tb08.27P2.630,Tb08.27P2.640,Tb09.v4.0031,Tb09.v4.0046,Tb09.v4.0048,Tb09.v4.0069,Tb09.v4.0076,Tb09.v4.0077,Tb09.v4.0081,Tb09.v4.0087,Tb09.v4.0089,Tb09.v4.0116,Tb09.v4.0119,Tb09.v4.0120,Tb09.v4.0123,Tb09.v4.0129,Tb09.v4.0137,Tb09.v4.0139,Tb09.v4.0155,Tb09.v4.0156,Tb09.v4.0159,Tb09.v4.0168,Tb09.v4.0185,Tb09.v4.0190,Tb09.v4.0200,Tb0…
Tb427_000697000.1-p1-CDS6	Tb427_000697000.1	unitig_1986_Tb427v10	Tb05.5K5.180	GRESAG 4 receptor-type adenylate cyclase	GRESAG	Adenylate and Guanylate cyclase catalytic domain containing protein	14	-0.0288	NA	0	0.79	32.8	164	41	23	45	5	8	3	1.19	0.83	1.27	0.57	1.03	0.43	Tb05.5K5.180,Tb05.5K5.190,Tb09.v4.0009,Tb11.v5.0209,Tb11.v5.0217,Tb11.v5.0281,Tb11.v5.0379,Tb11.v5.0380,Tb11.v5.0424,Tb11.v5.0425,Tb11.v5.0429,Tb11.v5.0431,Tb11.v5.0456,Tb11.v5.0470,Tb11.v5.0484,Tb11.v5.0546,Tb11.v5.0576,Tb11.v5.0654,Tb11.v5.0784,Tb11.v5.0821,Tb11.v5.0830,Tb11.v5.0864,Tb11.v5.0865,Tb11.v5.1015,Tb11.v5.1016,Tb927.10.13040,Tb927.10.16000,Tb927.10.16190,Tb927.10.2430,Tb927.11.13740,…
Tb427_000286700.1-p1-CDS7	Tb427_000286700.1	Chr3_3A_Tb427v10	Tb927.2.300	DNA-directed RNA polymerase, pseudogene	Pseudogene	RNA polymerase Rpb2, domain 4/RNA polymerase Rpb2, domain 6	13	-0.1511	NA	0	0.59	21	105	49	27	45	5	4	4	1.43	0.97	1.27	0.57	0.52	0.57	Tb927.2.300,Tb927.2.420,Tb927.2.460,Tb927.2.540,Tb927.4.230,Tb927.6.5190
Tb427_000660900.1-p1-CDS2	Tb427_000660900.1	unitig_1859_Tb427v10	Tb09.v4.0013	retrotransposon hot spot (RHS) protein	RHS	Retrotransposon hot spot protein	15	0.0293	NA	0	0.96	28.4	142	30	33	45	5	6	7	0.87	1.18	1.27	0.57	0.77	1	Tb09.v4.0013,Tb09.v4.0067,Tb11.0820,Tb11.1780,Tb11.v5.0214,Tb11.v5.0294,Tb11.v5.0295,Tb11.v5.0325,Tb11.v5.0326,Tb11.v5.0353,Tb11.v5.0489,Tb11.v5.0532,Tb11.v5.0533,Tb11.v5.0594,Tb11.v5.0624,Tb11.v5.0670,Tb11.v5.0693,Tb11.v5.0839,Tb927.1.120,Tb927.1.180,Tb927.1.190,Tb927.1.220,Tb927.1.70,Tb927.1.90,Tb927.10.110,Tb927.10.70,Tb927.2.100,Tb927.2.1120,Tb927.2.1180,Tb927.2.1210,Tb927.2.270,Tb927.2.280,T…
Tb427_000642900.1-p1-CDS2	Tb427_000642900.1	unitig_173_Tb427v10	Tb10.v4.0215	hypothetical protein	ZUnknown	hypothetical protein, conserved	17	-0.2367	NA	0	0.6	14.2	71	75	46	45	5	3	5	2.18	1.65	1.27	0.57	0.39	0.71	Tb10.v4.0215,Tb927.9.15820
Tb427_000793400.1-p1-CDS1	Tb427_000793400.1	unitig_2569_Tb427v10	Tb927.1.490	hypothetical protein	ZUnknown	hypothetical protein, conserved	18	0.0187	NA	0	1.17	60.2	301	57	40	45	5	9	7	1.66	1.44	1.27	0.57	1.16	1	Tb927.1.490,Tb927.4.180,Tb927.9.740
Tb427_000766300.1-p1-CDS1	Tb427_000766300.1	unitig_2451_Tb427v10	Tb927.1.490	hypothetical protein	ZUnknown	hypothetical protein, conserved	19	0.0769	NA	0	1.33	61.2	306	52	43	45	5	9	9	1.51	1.54	1.27	0.57	1.16	1.28	Tb927.1.490,Tb927.4.180,Tb927.9.740
Tb427_000640600.1-p1-CDS1	Tb427_000640600.1	unitig_168_Tb427v10	Tb11.v5.1020	retrotransposon hot spot (RHS) protein	RHS	Reverse transcriptase (RNA-dependent DNA polymerase)	15	-0.111	NA	0	0.73	69.33	208	57	31	53	3	5	5	1.66	1.11	1.5	0.34	0.64	0.71	Tb11.v5.1020,Tb927.1.240,Tb927.1.500,Tb927.10.16200,Tb927.11.18610,Tb927.11.18630
Tb427_000796000.1-p1-CDS1	Tb427_000796000.1	unitig_2582_Tb427v10	Tb10.v4.0215	hypothetical protein	ZUnknown	hypothetical protein, conserved	16	-0.1189	NA	0	0.8	23	69	62	40	53	3	7	4	1.8	1.44	1.5	0.34	0.9	0.57	Tb10.v4.0215,Tb927.9.15820
Tb427_060006000.1-p1-CDS4	Tb427_060006000.1	Chr6_core_Tb427v10	Tb05.5K5.250	hypothetical protein	ZUnknown	hypothetical protein, conserved	12	-0.2281	NA	0	0.37	5.75	23	47	26	50	4	2	3	1.37	0.93	1.41	0.45	0.26	0.43	Tb05.5K5.250
Tb427_010026500.1-p1-CDS12	Tb427_010026500.1	Chr1_core_Tb427v10	Tb11.v5.1020	retrotransposon hot spot (RHS) protein	RHS	Reverse transcriptase (RNA-dependent DNA polymerase)	15	0.1105	NA	0	1.15	28.33	85	32	24	54	3	11	5	0.93	0.86	1.52	0.34	1.42	0.71	Tb11.v5.1020,Tb927.1.240,Tb927.1.500,Tb927.10.16200,Tb927.11.18610,Tb927.11.18630
Tb427_000348100.1-p1-CDS1	Tb427_000348100.1	Chr4_5B_Tb427v10	Tb927.11.17840	retrotransposon hot spot protein (RHS, pseudogene)	RHS	Retrotransposon hot spot protein	14	-0.1245	NA	0	0.65	63.33	190	48	31	54	3	5	4	1.4	1.11	1.52	0.34	0.64	0.57	Tb927.11.17840,Tb927.2.720,Tb927.2.980,Tb927.4.190,Tb927.5.160
Tb427_000776600.1-p1-CDS1	Tb427_000776600.1	unitig_2476_Tb427v10	Tb927.1.3750	hypothetical protein, conserved	ZUnknown	hypothetical protein, conserved	8	-0.0693	NA	0	0.36	28	56	11	12	58	2	3	2	0.32	0.43	1.64	0.23	0.39	0.28	Tb927.1.3750,Tb927.2.1470,Tb927.3.3430,Tb927.7.6870,Tb927.9.17690
Tb427_000824400.1-p1-CDS3	Tb427_000824400.1	unitig_308_Tb427v10	Tb11.v5.1020	retrotransposon hot spot (RHS) protein	RHS	Reverse transcriptase (RNA-dependent DNA polymerase)	12	-0.2214	NA	0	0.35	23.2	116	42	25	46	5	4	1	1.22	0.9	1.3	0.57	0.52	0.14	Tb11.v5.1020,Tb927.1.240,Tb927.1.500,Tb927.10.16200,Tb927.11.18610,Tb927.11.18630
Tb427_000694500.1-p1-CDS1	Tb427_000694500.1	unitig_1973_Tb427v10	Tb927.1.490	hypothetical protein	ZUnknown	hypothetical protein, conserved	18	-0.0317	NA	0	1.02	59.8	299	45	49	46	5	6	8	1.31	1.76	1.3	0.57	0.77	1.14	Tb927.1.490,Tb927.4.180,Tb927.9.740
Tb427_000664100.1-p1-CDS7	Tb427_000664100.1	unitig_1878_Tb427v10	Tb927.1.3750	hypothetical protein, conserved	ZUnknown	hypothetical protein	7	-0.0974	NA	0	0.15	#DIV/0!	19	13	10	67	0	0	2	0.38	0.36	1.89	0	0	0.28	Tb927.1.3750,Tb927.2.1470,Tb927.3.3430,Tb927.7.6870,Tb927.9.17690
Tb427_000666900.1-p1-CDS5	Tb427_000666900.1	unitig_1881_Tb427v10	Tb11.v5.1020	retrotransposon hot spot (RHS) protein	RHS	Reverse transcriptase (RNA-dependent DNA polymerase)	10	-0.0062	NA	0	0.58	12.33	74	14	11	43	6	4	4	0.41	0.39	1.21	0.68	0.52	0.57	Tb11.v5.1020,Tb927.1.240,Tb927.1.500,Tb927.10.16200,Tb927.11.18610,Tb927.11.18630
Tb427_080019300.1-p1-CDS1	Tb427_080019300.1	Chr8_core_Tb427v10	Tb927.8.1660	procyclin-associated gene (pseudogene)	PAG	hypothetical protein, conserved	18	0.1205	NA	0	1.28	6.2	31	38	39	47	5	10	8	1.11	1.4	1.33	0.57	1.29	1.14	Tb927.8.1660
Tb427_000642300.1-p1-CDS5	Tb427_000642300.1	unitig_172_Tb427v10	Tb927.2.300	DNA-directed RNA polymerase, pseudogene	Pseudogene	RNA polymerase Rpb2, domain 4/RNA polymerase Rpb2, domain 6	16	-0.0692	NA	0	0.84	11	55	40	45	47	5	8	4	1.16	1.62	1.33	0.57	1.03	0.57	Tb927.2.300,Tb927.2.420,Tb927.2.460,Tb927.2.540,Tb927.4.230,Tb927.6.5190
Tb427_000142100.1-p1-CDS1	Tb427_000142100.1	Chr11_3A_Tb427v10	Tb11.v5.1020	retrotransposon hot spot (RHS) protein	RHS	Reverse transcriptase (RNA-dependent DNA polymerase)	16	0.0952	NA	0	1.12	37.8	189	42	25	47	5	11	5	1.22	0.9	1.33	0.57	1.42	0.71	Tb11.v5.1020,Tb927.1.240,Tb927.1.500,Tb927.10.16200,Tb927.11.18610,Tb927.11.18630
Tb427_070084800.1-p1-CDS2	Tb427_070084800.1	Chr7_core_Tb427v10	Tb09.v4.0066	hypothetical protein	ZUnknown	hypothetical protein, conserved	15	0.0413	NA	0	0.99	89.6	448	36	31	47	5	8	6	1.05	1.11	1.33	0.57	1.03	0.85	Tb09.v4.0066,Tb927.1.110
Tb427_000743100.1-p1-CDS1	Tb427_000743100.1	unitig_2223_Tb427v10	Tb10.v4.0221	hypothetical protein	ZUnknown	hypothetical protein, conserved	17	0.0105	NA	0	1.07	13.2	66	48	40	47	5	7	8	1.4	1.44	1.33	0.57	0.9	1.14	Tb10.v4.0221
Tb427_000695400.1-p1-CDS2	Tb427_000695400.1	unitig_1976_Tb427v10	Tb927.9.780	hypothetical protein	ZUnknown	hypothetical protein, conserved	15	-0.1479	NA	0	0.63	42.4	212	39	43	47	5	6	3	1.13	1.54	1.33	0.57	0.77	0.43	Tb927.9.780
Tb427_000763500.1-p1-CDS5	Tb427_000763500.1	unitig_2344_Tb427v10	Tb05.5K5.180	GRESAG 4 receptor-type adenylate cyclase	GRESAG	Adenylate and Guanylate cyclase catalytic domain containing protein	17	0.03	NA	0	1.07	35.5	213	44	38	44	6	5	10	1.28	1.36	1.24	0.68	0.64	1.42	Tb05.5K5.180,Tb05.5K5.190,Tb09.v4.0009,Tb11.v5.0209,Tb11.v5.0217,Tb11.v5.0281,Tb11.v5.0379,Tb11.v5.0380,Tb11.v5.0424,Tb11.v5.0425,Tb11.v5.0429,Tb11.v5.0431,Tb11.v5.0456,Tb11.v5.0470,Tb11.v5.0484,Tb11.v5.0546,Tb11.v5.0576,Tb11.v5.0654,Tb11.v5.0784,Tb11.v5.0821,Tb11.v5.0830,Tb11.v5.0864,Tb11.v5.0865,Tb11.v5.1015,Tb11.v5.1016,Tb927.10.13040,Tb927.10.16000,Tb927.10.16190,Tb927.10.2430,Tb927.11.13740,…
Tb427_020033200.1-p1-CDS13	Tb427_020033200.1	Chr2_core_Tb427v10	Tb11.v5.1020	retrotransposon hot spot (RHS) protein	RHS	hypothetical protein, conserved	11	-0.0607	NA	0	0.56	1	6	23	19	44	6	5	3	0.67	0.68	1.24	0.68	0.64	0.43	Tb11.v5.1020,Tb927.1.240,Tb927.1.500,Tb927.10.16200,Tb927.11.18610,Tb927.11.18630
Tb427_000786000.1-p1-CDS1	Tb427_000786000.1	unitig_2507_Tb427v10	Tb11.v5.1020	retrotransposon hot spot (RHS) protein	RHS	hypothetical protein	16	0.044	NA	0	0.99	43.17	259	43	25	44	6	7	7	1.25	0.9	1.24	0.68	0.9	1	Tb11.v5.1020,Tb927.1.240,Tb927.1.500,Tb927.10.16200,Tb927.11.18610,Tb927.11.18630
Tb427_000421000.1-p1-CDS1	Tb427_000421000.1	Chr6_3B_Tb427v10	Tb11.v5.1020	retrotransposon hot spot (RHS) protein	RHS	Reverse transcriptase (RNA-dependent DNA polymerase)	16	0.0975	NA	0	1.11	36.67	220	38	30	44	6	10	6	1.11	1.08	1.24	0.68	1.29	0.85	Tb11.v5.1020,Tb927.1.240,Tb927.1.500,Tb927.10.16200,Tb927.11.18610,Tb927.11.18630
Tb427_000643900.1-p1-CDS2	Tb427_000643900.1	unitig_182_Tb427v10	Tb09.v4.0153	hypothetical protein	ZUnknown	hypothetical protein, conserved	17	0.0719	NA	0	1.13	68.5	274	46	28	52	4	9	7	1.34	1.01	1.47	0.45	1.16	1	Tb09.v4.0153
Tb427_000757000.1-p1-CDS2	Tb427_000757000.1	unitig_2332_Tb427v10	Tb927.5.297b	hypothetical protein	ZUnknown	hypothetical protein, conserved	18	0.0322	NA	0	1.13	19.5	78	54	35	52	4	8	8	1.57	1.26	1.47	0.45	1.03	1.14	Tb927.5.297b
Tb427_000644300.1-p1-CDS1	Tb427_000644300.1	unitig_1835_Tb427v10	Tb927.1.490	hypothetical protein	ZUnknown	hypothetical protein, conserved	16	-0.1391	NA	0	0.7	82.33	247	49	45	56	3	6	4	1.43	1.62	1.58	0.34	0.77	0.57	Tb927.1.490,Tb927.4.180,Tb927.9.740
Tb427_000801000.1-p1-CDS2	Tb427_000801000.1	unitig_262_Tb427v10	Tb10.v4.0215	hypothetical protein	ZUnknown	hypothetical protein, conserved	19	-0.0463	NA	0	1.04	15.2	76	57	51	48	5	10	5	1.66	1.83	1.36	0.57	1.29	0.71	Tb10.v4.0215,Tb927.9.15820
Tb427_000737700.1-p1-CDS2	Tb427_000737700.1	unitig_2217_Tb427v10	Tb10.v4.0215	hypothetical protein	ZUnknown	hypothetical protein, conserved	16	-0.1144	NA	0	0.76	26.6	133	67	30	49	5	6	5	1.95	1.08	1.38	0.57	0.77	0.71	Tb10.v4.0215,Tb927.9.15820
Tb427_000668500.1-p1-CDS2	Tb427_000668500.1	unitig_1884_Tb427v10	Tb927.1.3750	hypothetical protein, conserved	ZUnknown	hypothetical protein	7	-0.1076	NA	0	0.14	17	17	9	10	65	1	0	2	0.26	0.36	1.84	0.11	0	0.28	Tb927.1.3750,Tb927.2.1470,Tb927.3.3430,Tb927.7.6870,Tb927.9.17690
Tb427_000403900.1-p1-CDS1	Tb427_000403900.1	Chr6_3A_Tb427v10	Tb09.v4.0152	hypothetical protein	ZUnknown	hypothetical protein	16	-0.1411	NA	0	0.69	3.67	22	47	41	45	6	5	5	1.37	1.47	1.27	0.68	0.64	0.71	Tb09.v4.0152,Tb927.11.17830,Tb927.9.760
Tb427_000806700.1-p1-CDS1	Tb427_000806700.1	unitig_278_Tb427v10	Tb10.v4.0221	hypothetical protein	ZUnknown	hypothetical protein	16	0.0169	NA	0	0.96	11	66	43	32	45	6	8	6	1.25	1.15	1.27	0.68	1.03	0.85	Tb10.v4.0221
Tb427_000792200.1-p1-CDS2	Tb427_000792200.1	unitig_2568_Tb427v10	Tb927.1.280	Protein of unknown function (DUF1181)	ZUnknown	Protein of unknown function (DUF1181)	14	-0.0359	NA	0	0.78	21.83	131	27	36	45	6	4	7	0.79	1.29	1.27	0.68	0.52	1	Tb927.1.280,Tb927.1.380,Tb927.1.470,Tb927.2.160,Tb927.2.680,Tb927.2.940,Tb927.4.150,Tb927.6.120,Tb927.7.7550
Tb427_110094700.1-p1-CDS2	Tb427_110094700.1	Chr11_core_Tb427v10	Tb927.11.8840	hypothetical protein	ZUnknown	hypothetical protein, conserved	12	-0.0982	NA	0	0.53	1	4	31	25	54	4	7	1	0.9	0.9	1.52	0.45	0.9	0.14	Tb927.11.8840
Tb427_050046600.1-p1-CDS1	Tb427_050046600.1	Chr5_core_Tb427v10	Tb927.9.780	hypothetical protein	ZUnknown	hypothetical protein, conserved	13	-0.1713	NA	0	0.48	3	12	41	28	54	4	4	3	1.19	1.01	1.52	0.45	0.52	0.43	Tb927.9.780
Tb427_000824700.1-p1-CDS5	Tb427_000824700.1	unitig_308_Tb427v10	Tb927.2.300	DNA-directed RNA polymerase, pseudogene	Pseudogene	RNA polymerase Rpb2, domain 4	14	-0.1099	NA	0	0.62	17.5	105	37	29	46	6	4	5	1.08	1.04	1.3	0.68	0.52	0.71	Tb927.2.300,Tb927.2.420,Tb927.2.460,Tb927.2.540,Tb927.4.230,Tb927.6.5190
Tb427_000279500.1-p1-CDS3	Tb427_000279500.1	Chr2_5A_Tb427v10	Tb11.v5.1020	retrotransposon hot spot (RHS) protein	RHS	Reverse transcriptase (RNA-dependent DNA polymerase)	14	-0.0908	NA	0	0.68	41.8	209	40	30	50	5	5	5	1.16	1.08	1.41	0.57	0.64	0.71	Tb11.v5.1020,Tb927.1.240,Tb927.1.500,Tb927.10.16200,Tb927.11.18610,Tb927.11.18630
Tb427_000706900.1-p1-CDS1	Tb427_000706900.1	unitig_2085_Tb427v10	Tb11.v5.1020	retrotransposon hot spot (RHS) protein	RHS	Retrotransposon hot spot protein	13	-0.0696	NA	0	0.6	89.4	447	27	26	50	5	7	2	0.79	0.93	1.41	0.57	0.9	0.28	Tb11.v5.1020,Tb927.1.240,Tb927.1.500,Tb927.10.16200,Tb927.11.18610,Tb927.11.18630
Tb427_000772900.1-p1-CDS2	Tb427_000772900.1	unitig_2457_Tb427v10	Tb11.v5.1020	retrotransposon hot spot (RHS) protein	RHS	Reverse transcriptase (RNA-dependent DNA polymerase)	23	0.182	NA	0	1.69	16.33	98	64	50	46	6	15	10	1.86	1.8	1.3	0.68	1.93	1.42	Tb11.v5.1020,Tb927.1.240,Tb927.1.500,Tb927.10.16200,Tb927.11.18610,Tb927.11.18630
Tb427_000693500.1-p1-CDS3	Tb427_000693500.1	unitig_1969_Tb427v10	Tb10.v4.0215	hypothetical protein	ZUnknown	hypothetical protein, conserved	17	-0.2571	NA	0	0.56	43.2	216	75	49	50	5	3	5	2.18	1.76	1.41	0.57	0.39	0.71	Tb10.v4.0215,Tb927.9.15820
Tb427_000741200.1-p1-CDS1	Tb427_000741200.1	unitig_2222_Tb427v10	Tb10.v4.0215	hypothetical protein	ZUnknown	hypothetical protein, conserved	16	-0.2517	NA	0	0.49	26.2	131	64	41	50	5	2	5	1.86	1.47	1.41	0.57	0.26	0.71	Tb10.v4.0215,Tb927.9.15820
Tb427_000755800.1-p1-CDS3	Tb427_000755800.1	unitig_2332_Tb427v10	Tb10.v4.0215	hypothetical protein	ZUnknown	hypothetical protein, conserved	17	0.0838	NA	0	1.15	20.6	103	37	39	50	5	11	6	1.08	1.4	1.41	0.57	1.42	0.85	Tb10.v4.0215,Tb927.9.15820
Tb427_000831900.1-p1-CDS4	Tb427_000831900.1	unitig_348_Tb427v10	Tb927.1.400	hypothetical protein, conserved	ZUnknown	hypothetical protein, conserved	16	-0.1436	NA	0	0.68	17.67	106	53	36	46	6	6	4	1.54	1.29	1.3	0.68	0.77	0.57	Tb927.1.400
Tb427_000831600.1-p1-CDS2	Tb427_000831600.1	unitig_348_Tb427v10	Tb05.5K5.350	ESAG3 pseudogene	ESAG.pseudo	hypothetical protein, conserved	13	-0.1764	NA	0	0.48	26.25	105	42	29	55	4	3	4	1.22	1.04	1.55	0.45	0.39	0.57	Tb05.5K5.350,Tb05.5K5.420,Tb05.5K5.500,Tb08.27P2.160,Tb08.27P2.250,Tb08.27P2.330,Tb08.27P2.400,Tb08.27P2.520,Tb09.v4.0024,Tb09.v4.0027,Tb09.v4.0033,Tb09.v4.0045,Tb09.v4.0062,Tb09.v4.0083,Tb09.v4.0100,Tb09.v4.0115,Tb09.v4.0130,Tb09.v4.0132,Tb09.v4.0154,Tb09.v4.0160,Tb09.v4.0172,Tb09.v4.0181,Tb09.v4.0201,Tb09.v4.0206,Tb10.v4.0057,Tb10.v4.0066,Tb10.v4.0074,Tb10.v4.0090,Tb10.v4.0101,Tb10.v4.0137,Tb10…
Tb427_000642300.1-p1-CDS6	Tb427_000642300.1	unitig_172_Tb427v10	Tb927.2.300	DNA-directed RNA polymerase, pseudogene	Pseudogene	RNA polymerase Rpb2, domain 4/RNA polymerase Rpb2, domain 6	19	-0.0332	NA	0	1.02	26.25	105	64	39	55	4	7	8	1.86	1.4	1.55	0.45	0.9	1.14	Tb927.2.300,Tb927.2.420,Tb927.2.460,Tb927.2.540,Tb927.4.230,Tb927.6.5190
Tb427_000544700.1-p1-CDS4	Tb427_000544700.1	Chr8_5B_Tb427v10	Tb05.5K5.180	GRESAG 4 receptor-type adenylate cyclase	GRESAG	Adenylate and Guanylate cyclase catalytic domain containing protein	23	0.0271	NA	0	1.36	71.2	356	78	52	51	5	8	12	2.27	1.87	1.44	0.57	1.03	1.71	Tb05.5K5.180,Tb05.5K5.190,Tb09.v4.0009,Tb11.v5.0209,Tb11.v5.0217,Tb11.v5.0281,Tb11.v5.0379,Tb11.v5.0380,Tb11.v5.0424,Tb11.v5.0425,Tb11.v5.0429,Tb11.v5.0431,Tb11.v5.0456,Tb11.v5.0470,Tb11.v5.0484,Tb11.v5.0546,Tb11.v5.0576,Tb11.v5.0654,Tb11.v5.0784,Tb11.v5.0821,Tb11.v5.0830,Tb11.v5.0864,Tb11.v5.0865,Tb11.v5.1015,Tb11.v5.1016,Tb927.10.13040,Tb927.10.16000,Tb927.10.16190,Tb927.10.2430,Tb927.11.13740,…
Tb427_000795200.1-p1-CDS3	Tb427_000795200.1	unitig_2569_Tb427v10	Tb927.11.17840	retrotransposon hot spot protein (RHS, pseudogene)	RHS	Retrotransposon hot spot protein	13	-0.1049	NA	0	0.53	22.4	112	22	33	51	5	5	3	0.64	1.18	1.44	0.57	0.64	0.43	Tb927.11.17840,Tb927.2.720,Tb927.2.980,Tb927.4.190,Tb927.5.160
Tb427_060006000.1-p1-CDS3	Tb427_060006000.1	Chr6_core_Tb427v10	Tb05.5K5.250	hypothetical protein	ZUnknown	hypothetical protein, conserved	13	-0.1364	NA	0	0.55	10	50	42	25	51	5	3	5	1.22	0.9	1.44	0.57	0.39	0.71	Tb05.5K5.250
Tb427_000288000.1-p1-CDS1	Tb427_000288000.1	Chr3_3A_Tb427v10	Tb10.v4.0215	hypothetical protein	ZUnknown	hypothetical protein, conserved	18	-0.1601	NA	0	0.74	20	100	62	47	51	5	5	6	1.8	1.69	1.44	0.57	0.64	0.85	Tb10.v4.0215,Tb927.9.15820
Tb427_000757400.1-p1-CDS1	Tb427_000757400.1	unitig_2332_Tb427v10	Tb10.v4.0221	hypothetical protein	ZUnknown	hypothetical protein	18	0.0746	NA	0	1.15	14.4	72	49	33	51	5	7	10	1.43	1.18	1.44	0.57	0.9	1.42	Tb10.v4.0221
Tb427_000647700.1-p1-CDS3	Tb427_000647700.1	unitig_1841_Tb427v10	Tb09.v4.0013	retrotransposon hot spot (RHS) protein	RHS	Retrotransposon hot spot protein	14	-0.1131	NA	0	0.59	32	192	39	28	47	6	7	2	1.13	1.01	1.33	0.68	0.9	0.28	Tb09.v4.0013,Tb09.v4.0067,Tb11.0820,Tb11.1780,Tb11.v5.0214,Tb11.v5.0294,Tb11.v5.0295,Tb11.v5.0325,Tb11.v5.0326,Tb11.v5.0353,Tb11.v5.0489,Tb11.v5.0532,Tb11.v5.0533,Tb11.v5.0594,Tb11.v5.0624,Tb11.v5.0670,Tb11.v5.0693,Tb11.v5.0839,Tb927.1.120,Tb927.1.180,Tb927.1.190,Tb927.1.220,Tb927.1.70,Tb927.1.90,Tb927.10.110,Tb927.10.70,Tb927.2.100,Tb927.2.1120,Tb927.2.1180,Tb927.2.1210,Tb927.2.270,Tb927.2.280,T…
Tb427_000091900.1-p1-CDS1	Tb427_000091900.1	Chr10_3B_Tb427v10	Tb11.v5.1020	retrotransposon hot spot (RHS) protein	RHS	Reverse transcriptase (RNA-dependent DNA polymerase)	15	-0.0713	NA	0	0.76	37.17	223	49	27	47	6	4	7	1.43	0.97	1.33	0.68	0.52	1	Tb11.v5.1020,Tb927.1.240,Tb927.1.500,Tb927.10.16200,Tb927.11.18610,Tb927.11.18630
Tb427_000771900.1-p1-CDS2	Tb427_000771900.1	unitig_2456_Tb427v10	Tb11.v5.1020	retrotransposon hot spot (RHS) protein	RHS	Reverse transcriptase (RNA-dependent DNA polymerase)	25	0.2119	NA	0	1.83	16.33	98	65	54	47	6	12	15	1.89	1.94	1.33	0.68	1.55	2.13	Tb11.v5.1020,Tb927.1.240,Tb927.1.500,Tb927.10.16200,Tb927.11.18610,Tb927.11.18630
Tb427_000798100.1-p1-CDS1	Tb427_000798100.1	unitig_2610_Tb427v10	Tb927.1.490	hypothetical protein	ZUnknown	hypothetical protein, conserved	19	0.0654	NA	0	1.21	155	310	43	44	63	2	10	8	1.25	1.58	1.78	0.23	1.29	1.14	Tb927.1.490,Tb927.4.180,Tb927.9.740
Tb427_000665500.1-p1-CDS2	Tb427_000665500.1	unitig_1879_Tb427v10	Tb927.1.3750	hypothetical protein, conserved	ZUnknown	hypothetical protein, conserved	8	-0.1145	NA	0	0.2	16	16	19	8	68	1	2	1	0.55	0.29	1.92	0.11	0.26	0.14	Tb927.1.3750,Tb927.2.1470,Tb927.3.3430,Tb927.7.6870,Tb927.9.17690
Tb427_000725400.1-p1-CDS6	Tb427_000725400.1	unitig_2174_Tb427v10	Tb09.v4.0041	leucine-rich repeat protein LRRP, pseudogene	LRRP	Leucine Rich repeat	12	-0.324	NA	0	0.2	26.86	188	39	30	44	7	2	1	1.13	1.08	1.24	0.79	0.26	0.14	Tb09.v4.0041,Tb11.v5.0448,Tb11.v5.0551,Tb11.v5.0560,Tb11.v5.0602,Tb11.v5.0703,Tb11.v5.0838,Tb927.1.290,Tb927.1.370,Tb927.1.480,Tb927.11.1500,Tb927.11.1510,Tb927.2.1310,Tb927.2.170,Tb927.2.690,Tb927.2.950,Tb927.3.1490,Tb927.4.160,Tb927.6.130,Tb927.7.7540,Tb927.9.14540
Tb427_000055200.1-p1-CDS1	Tb427_000055200.1	Chr10_3A_Tb427v10	Tb11.v5.1020	retrotransposon hot spot (RHS) protein	RHS	Reverse transcriptase (RNA-dependent DNA polymerase)/RNase H	18	0.1995	NA	0	1.27	26	182	36	25	44	7	10	9	1.05	0.9	1.24	0.79	1.29	1.28	Tb11.v5.1020,Tb927.1.240,Tb927.1.500,Tb927.10.16200,Tb927.11.18610,Tb927.11.18630
Tb427_000757400.1-p1-CDS5	Tb427_000757400.1	unitig_2332_Tb427v10	Tb10.v4.0221	hypothetical protein	ZUnknown	hypothetical protein	17	-0.0926	NA	0	0.8	27.75	111	47	44	56	4	6	6	1.37	1.58	1.58	0.45	0.77	0.85	Tb10.v4.0221
Tb427_000349100.1-p1-CDS1	Tb427_000349100.1	Chr5_3A_Tb427v10	#N/A	#N/A	#N/A	#N/A	16	0.0431	NA	0	0.99	62.25	249	44	26	56	4	10	5	1.28	0.93	1.58	0.45	1.29	0.71	#N/A
Tb427_000016600.1-p1-CDS5	Tb427_000016600.1	BES2_Tb427v10	Tb05.5K5.350	ESAG3 pseudogene	ESAG.pseudo	hypothetical protein, conserved	16	-0.0793	NA	0	0.78	96.5	579	49	36	48	6	8	4	1.43	1.29	1.36	0.68	1.03	0.57	Tb05.5K5.350,Tb05.5K5.420,Tb05.5K5.500,Tb08.27P2.160,Tb08.27P2.250,Tb08.27P2.330,Tb08.27P2.400,Tb08.27P2.520,Tb09.v4.0024,Tb09.v4.0027,Tb09.v4.0033,Tb09.v4.0045,Tb09.v4.0062,Tb09.v4.0083,Tb09.v4.0100,Tb09.v4.0115,Tb09.v4.0130,Tb09.v4.0132,Tb09.v4.0154,Tb09.v4.0160,Tb09.v4.0172,Tb09.v4.0181,Tb09.v4.0201,Tb09.v4.0206,Tb10.v4.0057,Tb10.v4.0066,Tb10.v4.0074,Tb10.v4.0090,Tb10.v4.0101,Tb10.v4.0137,Tb10…
Tb427_000826100.1-p1-CDS1	Tb427_000826100.1	unitig_309_Tb427v10	Tb05.5K5.180	GRESAG 4 receptor-type adenylate cyclase	GRESAG	Adenylate and Guanylate cyclase catalytic domain containing protein	18	-0.0282	NA	0	1	51.6	258	52	45	52	5	8	7	1.51	1.62	1.47	0.57	1.03	1	Tb05.5K5.180,Tb05.5K5.190,Tb09.v4.0009,Tb11.v5.0209,Tb11.v5.0217,Tb11.v5.0281,Tb11.v5.0379,Tb11.v5.0380,Tb11.v5.0424,Tb11.v5.0425,Tb11.v5.0429,Tb11.v5.0431,Tb11.v5.0456,Tb11.v5.0470,Tb11.v5.0484,Tb11.v5.0546,Tb11.v5.0576,Tb11.v5.0654,Tb11.v5.0784,Tb11.v5.0821,Tb11.v5.0830,Tb11.v5.0864,Tb11.v5.0865,Tb11.v5.1015,Tb11.v5.1016,Tb927.10.13040,Tb927.10.16000,Tb927.10.16190,Tb927.10.2430,Tb927.11.13740,…
Tb427_000483400.1-p1-CDS7	Tb427_000483400.1	Chr7_5A_Tb427v10	Tb11.v5.1020	retrotransposon hot spot (RHS) protein	RHS	Reverse transcriptase (RNA-dependent DNA polymerase)	16	0.0754	NA	0	0.99	10.5	63	40	22	48	6	9	6	1.16	0.79	1.36	0.68	1.16	0.85	Tb11.v5.1020,Tb927.1.240,Tb927.1.500,Tb927.10.16200,Tb927.11.18610,Tb927.11.18630
Tb427_000643800.1-p1-CDS5	Tb427_000643800.1	unitig_182_Tb427v10	Tb927.5.297b	hypothetical protein	ZUnknown	hypothetical protein, conserved	15	-0.0785	NA	0	0.72	13	78	42	32	48	6	7	4	1.22	1.15	1.36	0.68	0.9	0.57	Tb927.5.297b
Tb427_000681500.1-p1-CDS3	Tb427_000681500.1	unitig_1910_Tb427v10	Tb927.2.300	DNA-directed RNA polymerase, pseudogene	Pseudogene	RNA polymerase Rpb2, domain 4/RNA polymerase Rpb2, domain 6	19	-0.1983	NA	0	0.72	48.17	289	71	55	49	6	5	6	2.06	1.97	1.38	0.68	0.64	0.85	Tb927.2.300,Tb927.2.420,Tb927.2.460,Tb927.2.540,Tb927.4.230,Tb927.6.5190
Tb427_000742800.1-p1-CDS2	Tb427_000742800.1	unitig_2223_Tb427v10	Tb927.5.297b	hypothetical protein	ZUnknown	hypothetical protein, conserved	16	-0.107	NA	0	0.72	19.5	78	51	35	57	4	6	5	1.48	1.26	1.61	0.45	0.77	0.71	Tb927.5.297b
Tb427_000693500.1-p1-CDS5	Tb427_000693500.1	unitig_1969_Tb427v10	Tb10.v4.0215	hypothetical protein	ZUnknown	hypothetical protein, conserved	19	-0.2132	NA	0	0.64	27.67	166	62	63	49	6	8	2	1.8	2.26	1.38	0.68	1.03	0.28	Tb10.v4.0215,Tb927.9.15820
Tb427_000826200.1-p1-CDS2	Tb427_000826200.1	unitig_309_Tb427v10	Tb927.1.270	hypothetical protein	ZUnknown	hypothetical protein, conserved	14	-0.1711	NA	0	0.51	27.14	190	50	27	45	7	6	2	1.45	0.97	1.27	0.79	0.77	0.28	Tb927.1.270,Tb927.2.1250,Tb927.2.650,Tb927.2.900,Tb927.4.120
Tb427_000757900.1-p1-CDS1	Tb427_000757900.1	unitig_2333_Tb427v10	Tb10.v4.0221	hypothetical protein	ZUnknown	hypothetical protein, conserved	16	-0.1048	NA	0	0.72	13.2	66	43	40	53	5	5	6	1.25	1.44	1.5	0.57	0.64	0.85	Tb10.v4.0221
Tb427_000813100.1-p1-CDS1	Tb427_000813100.1	unitig_2996_Tb427v10	#N/A	#N/A	#N/A	#N/A	23	0.1675	NA	0	1.59	265.6	1328	43	58	53	5	9	15	1.25	2.08	1.5	0.57	1.16	2.13	#N/A
Tb427_000837800.1-p1-CDS2	Tb427_000837800.1	unitig_517_Tb427v10	Tb05.5K5.350	ESAG3 pseudogene	ESAG.pseudo	hypothetical protein, conserved	16	-0.1966	NA	0	0.59	17.5	105	50	46	50	6	3	6	1.45	1.65	1.41	0.68	0.39	0.85	Tb05.5K5.350,Tb05.5K5.420,Tb05.5K5.500,Tb08.27P2.160,Tb08.27P2.250,Tb08.27P2.330,Tb08.27P2.400,Tb08.27P2.520,Tb09.v4.0024,Tb09.v4.0027,Tb09.v4.0033,Tb09.v4.0045,Tb09.v4.0062,Tb09.v4.0083,Tb09.v4.0100,Tb09.v4.0115,Tb09.v4.0130,Tb09.v4.0132,Tb09.v4.0154,Tb09.v4.0160,Tb09.v4.0172,Tb09.v4.0181,Tb09.v4.0201,Tb09.v4.0206,Tb10.v4.0057,Tb10.v4.0066,Tb10.v4.0074,Tb10.v4.0090,Tb10.v4.0101,Tb10.v4.0137,Tb10…
Tb427_000727700.1-p1-CDS7	Tb427_000727700.1	unitig_2175_Tb427v10	Tb927.2.300	DNA-directed RNA polymerase, pseudogene	Pseudogene	RNA polymerase Rpb2, domain 4/RNA polymerase Rpb2, domain 6	17	0.0259	NA	0	1	50.5	303	41	37	50	6	4	11	1.19	1.33	1.41	0.68	0.52	1.57	Tb927.2.300,Tb927.2.420,Tb927.2.460,Tb927.2.540,Tb927.4.230,Tb927.6.5190
Tb427_000696600.1-p1-CDS3	Tb427_000696600.1	unitig_197_Tb427v10	Tb09.v4.0013	retrotransposon hot spot (RHS) protein	RHS	Retrotransposon hot spot protein	25	0.1236	NA	0	1.64	103.25	413	70	59	58	4	10	15	2.04	2.12	1.64	0.45	1.29	2.13	Tb09.v4.0013,Tb09.v4.0067,Tb11.0820,Tb11.1780,Tb11.v5.0214,Tb11.v5.0294,Tb11.v5.0295,Tb11.v5.0325,Tb11.v5.0326,Tb11.v5.0353,Tb11.v5.0489,Tb11.v5.0532,Tb11.v5.0533,Tb11.v5.0594,Tb11.v5.0624,Tb11.v5.0670,Tb11.v5.0693,Tb11.v5.0839,Tb927.1.120,Tb927.1.180,Tb927.1.190,Tb927.1.220,Tb927.1.70,Tb927.1.90,Tb927.10.110,Tb927.10.70,Tb927.2.100,Tb927.2.1120,Tb927.2.1180,Tb927.2.1210,Tb927.2.270,Tb927.2.280,T…
Tb427_000191000.1-p1-CDS1	Tb427_000191000.1	Chr1_3A_Tb427v10	Tb11.v5.1020	retrotransposon hot spot (RHS) protein	RHS	Reverse transcriptase (RNA-dependent DNA polymerase)	14	-0.1923	NA	0	0.46	26.43	185	46	27	46	7	2	5	1.34	0.97	1.3	0.79	0.26	0.71	Tb11.v5.1020,Tb927.1.240,Tb927.1.500,Tb927.10.16200,Tb927.11.18610,Tb927.11.18630
Tb427_000570300.1-p1-CDS1	Tb427_000570300.1	Chr9_3A_Tb427v10	Tb11.v5.1020	retrotransposon hot spot (RHS) protein	RHS	Reverse transcriptase (RNA-dependent DNA polymerase)/RNase H	16	-0.0019	NA	0	0.83	51.29	359	35	32	46	7	8	5	1.02	1.15	1.3	0.79	1.03	0.71	Tb11.v5.1020,Tb927.1.240,Tb927.1.500,Tb927.10.16200,Tb927.11.18610,Tb927.11.18630
Tb427_030037000.1-p1-CDS7	Tb427_030037000.1	Chr3_core_Tb427v10	Tb11.v5.1020	retrotransposon hot spot (RHS) protein	RHS	hypothetical protein, conserved	15	0.0028	NA	0	0.78	21	147	34	23	46	7	6	6	0.99	0.83	1.3	0.79	0.77	0.85	Tb11.v5.1020,Tb927.1.240,Tb927.1.500,Tb927.10.16200,Tb927.11.18610,Tb927.11.18630
Tb427_090010100.1-p1-CDS4	Tb427_090010100.1	Chr9_core_Tb427v10	Tb09.v4.0136	variant surface glycoprotein (VSG, atypical)	VSG	Trypanosome variant surface glycoprotein (A-type)	17	-0.2248	NA	0	0.57	1	4	61	54	58	4	6	3	1.77	1.94	1.64	0.45	0.77	0.43	Tb09.v4.0136,Tb09.v4.0196,Tb10.v4.0212,Tb11.0500,Tb11.1130,Tb11.v5.0599,Tb11.v5.0952,Tb927.11.17670,Tb927.11.18140,Tb927.11.19450,Tb927.11.20200,Tb927.3.280,Tb927.4.5670,Tb927.5.5300
Tb427_000765400.1-p1-CDS2	Tb427_000765400.1	unitig_2451_Tb427v10	Tb10.v4.0215	hypothetical protein	ZUnknown	hypothetical protein, conserved	19	-0.188	NA	0	0.7	44	176	65	59	58	4	7	4	1.89	2.12	1.64	0.45	0.9	0.57	Tb10.v4.0215,Tb927.9.15820
Tb427_000654500.1-p1-CDS1	Tb427_000654500.1	unitig_1853_Tb427v10	Tb927.9.780	hypothetical protein	ZUnknown	hypothetical protein, conserved	17	-0.2089	NA	0	0.58	44	220	80	35	54	5	5	4	2.33	1.26	1.52	0.57	0.64	0.57	Tb927.9.780
Tb427_000499700.1-p1-CDS1	Tb427_000499700.1	Chr8_3A_Tb427v10	Tb927.1.490	hypothetical protein	ZUnknown	hypothetical protein, conserved	11	-0.3287	NA	0	0.12	39.83	239	39	25	50	6	2	0	1.13	0.9	1.41	0.68	0.26	0	Tb927.1.490,Tb927.4.180,Tb927.9.740
Tb427_000166700.1-p1-CDS1	Tb427_000166700.1	Chr11_3B_Tb427v10	Tb11.v5.1020	retrotransposon hot spot (RHS) protein	RHS	Reverse transcriptase (RNA-dependent DNA polymerase)/RNase H	21	0.0336	NA	0	1.19	49.67	298	53	56	51	6	13	6	1.54	2.01	1.44	0.68	1.68	0.85	Tb11.v5.1020,Tb927.1.240,Tb927.1.500,Tb927.10.16200,Tb927.11.18610,Tb927.11.18630
Tb427_000679500.1-p1-CDS1	Tb427_000679500.1	unitig_190_Tb427v10	Tb927.2.1060	retrotransposon hot spot protein (RHS1, pseudogene)	RHS	Retrotransposon hot spot protein	16	-0.1146	NA	0	0.68	10.67	64	45	41	51	6	9	2	1.31	1.47	1.44	0.68	1.16	0.28	Tb927.2.1060,Tb927.2.1160,Tb927.2.220
Tb427_000650400.1-p1-CDS4	Tb427_000650400.1	unitig_1843_Tb427v10	Tb927.2.1130	retrotransposon hot spot protein (RHS3, pseudogene)	RHS	Retrotransposon hot spot protein	13	-0.098	NA	0	0.58	34.67	208	33	26	51	6	4	5	0.96	0.93	1.44	0.68	0.52	0.71	Tb927.2.1130
Tb427_000082900.1-p1-CDS1	Tb427_000082900.1	Chr10_3B_Tb427v10	Tb11.v5.1020	retrotransposon hot spot (RHS) protein	RHS	Reverse transcriptase (RNA-dependent DNA polymerase)	18	-0.078	NA	0	0.84	43.71	306	56	39	47	7	5	8	1.63	1.4	1.33	0.79	0.64	1.14	Tb11.v5.1020,Tb927.1.240,Tb927.1.500,Tb927.10.16200,Tb927.11.18610,Tb927.11.18630
Tb427_000693900.1-p1-CDS1	Tb427_000693900.1	unitig_1970_Tb427v10	Tb927.1.490	hypothetical protein	ZUnknown	hypothetical protein, conserved	18	-0.1581	NA	0	0.72	71.75	287	58	51	59	4	4	7	1.69	1.83	1.67	0.45	0.52	1	Tb927.1.490,Tb927.4.180,Tb927.9.740
Tb427_100047800.1-p1-CDS1	Tb427_100047800.1	Chr10_core_Tb427v10	Tb927.10.12570	hypothetical protein	ZUnknown	hypothetical protein, conserved	16	-0.0699	NA	0	0.76	4.75	19	52	30	59	4	7	5	1.51	1.08	1.67	0.45	0.9	0.71	Tb927.10.12570
Tb427_000783400.1-p1-CDS1	Tb427_000783400.1	unitig_2495_Tb427v10	Tb927.9.780	hypothetical protein	ZUnknown	hypothetical protein, conserved	17	-0.0935	NA	0	0.76	35	140	58	34	59	4	6	6	1.69	1.22	1.67	0.45	0.77	0.85	Tb927.9.780
Tb427_000737200.1-p1-CDS1	Tb427_000737200.1	unitig_2217_Tb427v10	Tb927.1.280	Protein of unknown function (DUF1181)	ZUnknown	Protein of unknown function (DUF1181)	16	0.0286	NA	0	0.88	29.8	149	37	26	55	5	10	4	1.08	0.93	1.55	0.57	1.29	0.57	Tb927.1.280,Tb927.1.380,Tb927.1.470,Tb927.2.160,Tb927.2.680,Tb927.2.940,Tb927.4.150,Tb927.6.120,Tb927.7.7550
Tb427_060006000.1-p1-CDS1	Tb427_060006000.1	Chr6_core_Tb427v10	Tb05.5K5.250	hypothetical protein	ZUnknown	hypothetical protein, conserved	18	-0.0121	NA	0	0.96	10.83	65	54	36	51	6	8	7	1.57	1.29	1.44	0.68	1.03	1	Tb05.5K5.250
Tb427_000835400.1-p1-CDS1	Tb427_000835400.1	unitig_427_Tb427v10	Tb10.v4.0215	hypothetical protein	ZUnknown	hypothetical protein, conserved	19	-0.1245	NA	0	0.83	15.67	94	60	52	51	6	6	7	1.75	1.87	1.44	0.68	0.77	1	Tb10.v4.0215,Tb927.9.15820
Tb427_000785300.1-p1-CDS2	Tb427_000785300.1	unitig_2501_Tb427v10	Tb927.5.297b	hypothetical protein	ZUnknown	hypothetical protein, conserved	15	-0.0778	NA	0	0.69	13	78	42	30	51	6	8	3	1.22	1.08	1.44	0.68	1.03	0.43	Tb927.5.297b
Tb427_000725900.1-p1-CDS2	Tb427_000725900.1	unitig_2174_Tb427v10	Tb10.v4.0215	hypothetical protein	ZUnknown	hypothetical protein, conserved	17	-0.2555	NA	0	0.52	31.57	221	64	44	47	7	3	5	1.86	1.58	1.33	0.79	0.39	0.71	Tb10.v4.0215,Tb927.9.15820
Tb427_000799100.1-p1-CDS1	Tb427_000799100.1	unitig_2611_Tb427v10	Tb927.1.490	hypothetical protein	ZUnknown	hypothetical protein, conserved	18	-0.0901	NA	0	0.82	43.71	306	53	44	47	7	8	5	1.54	1.58	1.33	0.79	1.03	0.71	Tb927.1.490,Tb927.4.180,Tb927.9.740
Tb427_000721800.1-p1-CDS3	Tb427_000721800.1	unitig_2166_Tb427v10	Tb927.1.400	hypothetical protein, conserved	ZUnknown	hypothetical protein, conserved	16	-0.2255	NA	0	0.52	11.57	81	69	33	47	7	3	5	2.01	1.18	1.33	0.79	0.39	0.71	Tb927.1.400
Tb427_000307100.1-p1-CDS1	Tb427_000307100.1	Chr4_3A_Tb427v10	Tb09.v4.0051	variant surface glycoprotein (VSG)	VSG	Trypanosome variant surface glycoprotein (A-type)/Trypanosome variant surface glycoprotein C-terminal domain containing protein	6	-0.0431	NA	0	0.19	1	1	2	0	72	1	2	1	0.06	0	2.03	0.11	0.26	0.14	Tb09.v4.0051,Tb09.v4.0197,Tb927.11.19170,Tb927.4.5580,Tb927.9.900
Tb427_000797400.1-p1-CDS3	Tb427_000797400.1	unitig_2610_Tb427v10	Tb927.1.400	hypothetical protein, conserved	ZUnknown	hypothetical protein, conserved	15	-0.0414	NA	0	0.75	30	120	33	35	60	4	7	5	0.96	1.26	1.69	0.45	0.9	0.71	Tb927.1.400
Tb427_000733300.1-p1-CDS5	Tb427_000733300.1	unitig_219_Tb427v10	Tb05.5K5.180	GRESAG 4 receptor-type adenylate cyclase	GRESAG	Adenylate and Guanylate cyclase catalytic domain containing protein	18	0.0969	NA	0	1.07	31.75	254	47	27	44	8	9	8	1.37	0.97	1.24	0.91	1.16	1.14	Tb05.5K5.180,Tb05.5K5.190,Tb09.v4.0009,Tb11.v5.0209,Tb11.v5.0217,Tb11.v5.0281,Tb11.v5.0379,Tb11.v5.0380,Tb11.v5.0424,Tb11.v5.0425,Tb11.v5.0429,Tb11.v5.0431,Tb11.v5.0456,Tb11.v5.0470,Tb11.v5.0484,Tb11.v5.0546,Tb11.v5.0576,Tb11.v5.0654,Tb11.v5.0784,Tb11.v5.0821,Tb11.v5.0830,Tb11.v5.0864,Tb11.v5.0865,Tb11.v5.1015,Tb11.v5.1016,Tb927.10.13040,Tb927.10.16000,Tb927.10.16190,Tb927.10.2430,Tb927.11.13740,…
Tb427_000790400.1-p1-CDS2	Tb427_000790400.1	unitig_2565_Tb427v10	Tb11.v5.1020	retrotransposon hot spot (RHS) protein	RHS	Reverse transcriptase (RNA-dependent DNA polymerase)	22	0.0064	NA	0	1.19	43.2	216	73	49	56	5	11	8	2.12	1.76	1.58	0.57	1.42	1.14	Tb11.v5.1020,Tb927.1.240,Tb927.1.500,Tb927.10.16200,Tb927.11.18610,Tb927.11.18630
Tb427_000774400.1-p1-CDS3	Tb427_000774400.1	unitig_2467_Tb427v10	Tb09.v4.0013	retrotransposon hot spot (RHS) protein	RHS	Retrotransposon hot spot protein	17	0.0263	NA	0	0.95	22.5	135	46	30	52	6	7	8	1.34	1.08	1.47	0.68	0.9	1.14	Tb09.v4.0013,Tb09.v4.0067,Tb11.0820,Tb11.1780,Tb11.v5.0214,Tb11.v5.0294,Tb11.v5.0295,Tb11.v5.0325,Tb11.v5.0326,Tb11.v5.0353,Tb11.v5.0489,Tb11.v5.0532,Tb11.v5.0533,Tb11.v5.0594,Tb11.v5.0624,Tb11.v5.0670,Tb11.v5.0693,Tb11.v5.0839,Tb927.1.120,Tb927.1.180,Tb927.1.190,Tb927.1.220,Tb927.1.70,Tb927.1.90,Tb927.10.110,Tb927.10.70,Tb927.2.100,Tb927.2.1120,Tb927.2.1180,Tb927.2.1210,Tb927.2.270,Tb927.2.280,T…
Tb427_000212800.1-p1-CDS1	Tb427_000212800.1	Chr1_3A_Tb427v10	Tb11.v5.1020	retrotransposon hot spot (RHS) protein	RHS	RNase H	19	-0.0916	NA	0	0.87	42.5	340	58	51	44	8	8	6	1.69	1.83	1.24	0.91	1.03	0.85	Tb11.v5.1020,Tb927.1.240,Tb927.1.500,Tb927.10.16200,Tb927.11.18610,Tb927.11.18630
Tb427_000664700.1-p1-CDS5	Tb427_000664700.1	unitig_1879_Tb427v10	Tb11.v5.1020	retrotransposon hot spot (RHS) protein	RHS	hypothetical protein, conserved	15	-0.0067	NA	0	0.74	14.88	119	24	32	44	8	9	3	0.7	1.15	1.24	0.91	1.16	0.43	Tb11.v5.1020,Tb927.1.240,Tb927.1.500,Tb927.10.16200,Tb927.11.18610,Tb927.11.18630
Tb427_000421000.1-p1-CDS3	Tb427_000421000.1	Chr6_3B_Tb427v10	Tb11.v5.1020	retrotransposon hot spot (RHS) protein	RHS	Reverse transcriptase (RNA-dependent DNA polymerase)	15	0.0257	NA	0	0.83	22.38	179	35	24	44	8	5	8	1.02	0.86	1.24	0.91	0.64	1.14	Tb11.v5.1020,Tb927.1.240,Tb927.1.500,Tb927.10.16200,Tb927.11.18610,Tb927.11.18630
Tb427_000747600.1-p1-CDS1	Tb427_000747600.1	unitig_223_Tb427v10	Tb11.v5.1020	retrotransposon hot spot (RHS) protein	RHS	hypothetical protein, conserved	20	0.2289	NA	0	1.4	14.5	116	47	29	44	8	10	12	1.37	1.04	1.24	0.91	1.29	1.71	Tb11.v5.1020,Tb927.1.240,Tb927.1.500,Tb927.10.16200,Tb927.11.18610,Tb927.11.18630
Tb427_000695500.1-p1-CDS1	Tb427_000695500.1	unitig_1976_Tb427v10	Tb10.v4.0215	hypothetical protein	ZUnknown	hypothetical protein, conserved	18	-0.25	NA	0	0.56	26.33	158	69	49	52	6	5	4	2.01	1.76	1.47	0.68	0.64	0.57	Tb10.v4.0215,Tb927.9.15820
Tb427_000658800.1-p1-CDS1	Tb427_000658800.1	unitig_1858_Tb427v10	Tb10.v4.0215	hypothetical protein	ZUnknown	hypothetical protein, conserved	19	0.0687	NA	0	1.13	23.5	141	55	35	52	6	9	9	1.6	1.26	1.47	0.68	1.16	1.28	Tb10.v4.0215,Tb927.9.15820
Tb427_000784200.1-p1-CDS1	Tb427_000784200.1	unitig_2495_Tb427v10	Tb927.5.294b	hypothetical protein	ZUnknown	hypothetical protein, conserved	19	-0.001	NA	0	1	18	108	63	33	52	6	10	6	1.83	1.18	1.47	0.68	1.29	0.85	Tb927.5.294b
Tb427_000258500.1-p1-CDS2	Tb427_000258500.1	Chr1_3B_Tb427v10	Tb927.5.140	hypothetical protein, conserved	ZUnknown	hypothetical protein, conserved	19	-0.0458	NA	0	0.94	55	330	50	50	52	6	8	7	1.45	1.8	1.47	0.68	1.03	1	Tb927.5.140,Tb927.9.710
Tb427_000727300.1-p1-CDS2	Tb427_000727300.1	unitig_2175_Tb427v10	Tb09.v4.0066	hypothetical protein	ZUnknown	hypothetical protein, conserved	15	-0.1323	NA	0	0.58	54.25	434	32	39	44	8	3	6	0.93	1.4	1.24	0.91	0.39	0.85	Tb09.v4.0066,Tb927.1.110
Tb427_000817900.1-p1-CDS1	Tb427_000817900.1	unitig_302_Tb427v10	Tb09.v4.0152	hypothetical protein	ZUnknown	hypothetical protein, conserved	22	0.227	NA	0	1.53	28.38	227	49	42	44	8	9	15	1.43	1.51	1.24	0.91	1.16	2.13	Tb09.v4.0152,Tb927.11.17830,Tb927.9.760
Tb427_000791500.1-p1-CDS2	Tb427_000791500.1	unitig_2565_Tb427v10	Tb10.v4.0215	hypothetical protein	ZUnknown	hypothetical protein, conserved	20	-0.0287	NA	0	1	19.88	159	68	40	44	8	10	6	1.98	1.44	1.24	0.91	1.29	0.85	Tb10.v4.0215,Tb927.9.15820
Tb427_000775000.1-p1-CDS1	Tb427_000775000.1	unitig_2467_Tb427v10	Tb927.1.490	hypothetical protein	ZUnknown	hypothetical protein, conserved	15	-0.1167	NA	0	0.63	36.88	295	37	37	44	8	5	5	1.08	1.33	1.24	0.91	0.64	0.71	Tb927.1.490,Tb927.4.180,Tb927.9.740
Tb427_090086900.1-p1-CDS2	Tb427_090086900.1	Chr9_core_Tb427v10	Tb927.9.14650	SLACS retrotransposable element (part)	ZUnknown	hypothetical protein, conserved	17	0.0446	NA	0	0.93	8.25	66	42	28	44	8	11	4	1.22	1.01	1.24	0.91	1.42	0.57	Tb927.9.14650,Tb927.9.14660,Tb927.9.14940
Tb427_000729500.1-p1-CDS1	Tb427_000729500.1	unitig_2196_Tb427v10	#N/A	#N/A	#N/A	#N/A	15	-0.0789	NA	0	0.68	86.8	434	34	37	56	5	7	4	0.99	1.33	1.58	0.57	0.9	0.57	#N/A
Tb427_000809400.1-p1-CDS8	Tb427_000809400.1	unitig_284_Tb427v10	Tb927.2.300	DNA-directed RNA polymerase, pseudogene	Pseudogene	RNA polymerase Rpb2, domain 4/RNA polymerase Rpb2, domain 6	16	-0.0135	NA	0	0.81	13.43	94	36	33	48	7	8	5	1.05	1.18	1.36	0.79	1.03	0.71	Tb927.2.300,Tb927.2.420,Tb927.2.460,Tb927.2.540,Tb927.4.230,Tb927.6.5190
Tb427_000307500.1-p1-CDS1	Tb427_000307500.1	Chr4_3A_Tb427v10	Tb11.v5.1020	retrotransposon hot spot (RHS) protein	RHS	Endonuclease-reverse transcriptase	21	-0.0075	NA	0	1.13	26.43	185	62	55	48	7	11	7	1.8	1.97	1.36	0.79	1.42	1	Tb11.v5.1020,Tb927.1.240,Tb927.1.500,Tb927.10.16200,Tb927.11.18610,Tb927.11.18630
Tb427_000152000.1-p1-CDS1	Tb427_000152000.1	Chr11_3B_Tb427v10	Tb11.v5.1020	retrotransposon hot spot (RHS) protein	RHS	Reverse transcriptase (RNA-dependent DNA polymerase)/RNase H	18	0.159	NA	0	1.2	42.14	295	33	35	48	7	9	10	0.96	1.26	1.36	0.79	1.16	1.42	Tb11.v5.1020,Tb927.1.240,Tb927.1.500,Tb927.10.16200,Tb927.11.18610,Tb927.11.18630
Tb427_000713400.1-p1-CDS2	Tb427_000713400.1	unitig_2120_Tb427v10	Tb927.5.297b	hypothetical protein	ZUnknown	hypothetical protein, conserved	16	-0.1024	NA	0	0.66	11.14	78	53	28	48	7	1	9	1.54	1.01	1.36	0.79	0.13	1.28	Tb927.5.297b
Tb427_000677800.1-p1-CDS7	Tb427_000677800.1	unitig_1904_Tb427v10	Tb927.2.300	DNA-directed RNA polymerase, pseudogene	Pseudogene	RNA polymerase Rpb2, domain 4/RNA polymerase Rpb2, domain 6	19	0.0814	NA	0	1.12	7.71	54	49	36	49	7	11	7	1.43	1.29	1.38	0.79	1.42	1	Tb927.2.300,Tb927.2.420,Tb927.2.460,Tb927.2.540,Tb927.4.230,Tb927.6.5190
Tb427_000729400.1-p1-CDS2	Tb427_000729400.1	unitig_2196_Tb427v10	Tb927.1.3750	hypothetical protein, conserved	ZUnknown	hypothetical protein, conserved	9	-0.1078	NA	0	0.24	#DIV/0!	17	20	18	77	0	3	1	0.58	0.65	2.17	0	0.39	0.14	Tb927.1.3750,Tb927.2.1470,Tb927.3.3430,Tb927.7.6870,Tb927.9.17690
Tb427_000806300.1-p1-CDS2	Tb427_000806300.1	unitig_278_Tb427v10	Tb10.v4.0215	hypothetical protein	ZUnknown	hypothetical protein, conserved	22	0.1151	NA	0	1.38	37.5	150	62	43	61	4	10	12	1.8	1.54	1.72	0.45	1.29	1.71	Tb10.v4.0215,Tb927.9.15820
Tb427_100103500.1-p1-CDS1	Tb427_100103500.1	Chr10_core_Tb427v10	Tb927.10.9675	hypothetical protein	ZUnknown	hypothetical protein, conserved	20	0.1121	NA	0	1.2	1	7	51	34	49	7	7	12	1.48	1.22	1.38	0.79	0.9	1.71	Tb927.10.9675
Tb427_000746200.1-p1-CDS1	Tb427_000746200.1	unitig_2231_Tb427v10	Tb09.v4.0041	leucine-rich repeat protein LRRP, pseudogene	LRRP	hypothetical protein	17	-0.1418	NA	0	0.68	39.5	237	51	42	53	6	5	6	1.48	1.51	1.5	0.68	0.64	0.85	Tb09.v4.0041,Tb11.v5.0448,Tb11.v5.0551,Tb11.v5.0560,Tb11.v5.0602,Tb11.v5.0703,Tb11.v5.0838,Tb927.1.290,Tb927.1.370,Tb927.1.480,Tb927.11.1500,Tb927.11.1510,Tb927.2.1310,Tb927.2.170,Tb927.2.690,Tb927.2.950,Tb927.3.1490,Tb927.4.160,Tb927.6.130,Tb927.7.7540,Tb927.9.14540
Tb427_000707700.1-p1-CDS3	Tb427_000707700.1	unitig_2087_Tb427v10	Tb927.2.300	DNA-directed RNA polymerase, pseudogene	Pseudogene	RNA polymerase Rpb2, domain 4/RNA polymerase Rpb2, domain 6	17	-0.1779	NA	0	0.62	74.67	224	69	42	65	3	5	5	2.01	1.51	1.84	0.34	0.64	0.71	Tb927.2.300,Tb927.2.420,Tb927.2.460,Tb927.2.540,Tb927.4.230,Tb927.6.5190
Tb427_000675900.1-p1-CDS1	Tb427_000675900.1	unitig_1902_Tb427v10	Tb927.11.17840	retrotransposon hot spot protein (RHS, pseudogene)	RHS	Retrotransposon hot spot protein	13	-0.1377	NA	0	0.45	29.4	147	32	26	57	5	1	6	0.93	0.93	1.61	0.57	0.13	0.85	Tb927.11.17840,Tb927.2.720,Tb927.2.980,Tb927.4.190,Tb927.5.160
Tb427_000665700.1-p1-CDS11	Tb427_000665700.1	unitig_1879_Tb427v10	Tb11.v5.1020	retrotransposon hot spot (RHS) protein	RHS	hypothetical protein, conserved	20	0.2115	NA	0	1.38	66	396	43	32	53	6	9	13	1.25	1.15	1.5	0.68	1.16	1.85	Tb11.v5.1020,Tb927.1.240,Tb927.1.500,Tb927.10.16200,Tb927.11.18610,Tb927.11.18630
Tb427_000222600.1-p1-CDS1	Tb427_000222600.1	Chr1_3A_Tb427v10	Tb927.11.17840	retrotransposon hot spot protein (RHS, pseudogene)	RHS	Retrotransposon hot spot protein	17	-0.0969	NA	0	0.75	24	144	50	38	53	6	5	7	1.45	1.36	1.5	0.68	0.64	1	Tb927.11.17840,Tb927.2.720,Tb927.2.980,Tb927.4.190,Tb927.5.160
Tb427_000252500.1-p1-CDS1	Tb427_000252500.1	Chr1_3B_Tb427v10	Tb11.v5.1020	retrotransposon hot spot (RHS) protein	RHS	RNase H	18	-0.0071	NA	0	0.93	29.63	237	56	33	45	8	8	7	1.63	1.18	1.27	0.91	1.03	1	Tb11.v5.1020,Tb927.1.240,Tb927.1.500,Tb927.10.16200,Tb927.11.18610,Tb927.11.18630
Tb427_000811400.1-p1-CDS1	Tb427_000811400.1	unitig_288_Tb427v10	Tb11.v5.1020	retrotransposon hot spot (RHS) protein	RHS	hypothetical protein, conserved	19	0.0329	NA	0	1.05	35.5	284	57	37	45	8	10	7	1.66	1.33	1.27	0.91	1.29	1	Tb11.v5.1020,Tb927.1.240,Tb927.1.500,Tb927.10.16200,Tb927.11.18610,Tb927.11.18630
Tb427_110094800.1-p1-CDS3	Tb427_110094800.1	Chr11_core_Tb427v10	Tb11.v5.1020	retrotransposon hot spot (RHS) protein	RHS	Reverse transcriptase (RNA-dependent DNA polymerase)	21	0.2137	NA	0	1.42	21.63	173	52	36	45	8	13	10	1.51	1.29	1.27	0.91	1.68	1.42	Tb11.v5.1020,Tb927.1.240,Tb927.1.500,Tb927.10.16200,Tb927.11.18610,Tb927.11.18630
Tb427_000796400.1-p1-CDS4	Tb427_000796400.1	unitig_2582_Tb427v10	Tb11.v5.0349	DNA-directed RNA polymerase II subunit 2	RNA.synthesis	RNA polymerase Rpb2, domain 6	16	-0.154	NA	0	0.63	27.33	164	52	36	53	6	4	6	1.51	1.29	1.5	0.68	0.52	0.85	Tb11.v5.0349,Tb927.1.100,Tb927.2.1110,Tb927.2.1200,Tb927.2.490
Tb427_000749100.1-p1-CDS1	Tb427_000749100.1	unitig_224_Tb427v10	Tb10.v4.0215	hypothetical protein	ZUnknown	hypothetical protein, conserved	20	-0.0358	NA	0	0.97	14.33	43	69	42	65	3	12	4	2.01	1.51	1.84	0.34	1.55	0.57	Tb10.v4.0215,Tb927.9.15820
Tb427_100100600.1-p1-CDS2	Tb427_100100600.1	Chr10_core_Tb427v10	Tb927.10.9340	hypothetical protein	ZUnknown	hypothetical protein, conserved	17	-0.1321	NA	0	0.67	1	3	64	38	65	3	8	3	1.86	1.36	1.84	0.34	1.03	0.43	Tb927.10.9340
Tb427_000838900.1-p1-CDS3	Tb427_000838900.1	unitig_520_Tb427v10	Tb927.1.400	hypothetical protein, conserved	ZUnknown	hypothetical protein, conserved	19	-0.0069	NA	0	1.01	12	60	61	38	57	5	5	11	1.77	1.36	1.61	0.57	0.64	1.57	Tb927.1.400
Tb427_000502700.1-p1-CDS6	Tb427_000502700.1	Chr8_5A_Tb427v10	Tb10.v4.0215	hypothetical protein	ZUnknown	hypothetical protein, conserved	13	-0.1803	NA	0	0.44	22.88	183	39	25	45	8	4	3	1.13	0.9	1.27	0.91	0.52	0.43	Tb10.v4.0215,Tb927.9.15820
Tb427_000712000.1-p1-CDS1	Tb427_000712000.1	unitig_2119_Tb427v10	Tb10.v4.0215	hypothetical protein	ZUnknown	hypothetical protein, conserved	17	-0.0592	NA	0	0.79	15.63	125	56	31	45	8	9	4	1.63	1.11	1.27	0.91	1.16	0.57	Tb10.v4.0215,Tb927.9.15820
Tb427_000801900.1-p1-CDS1	Tb427_000801900.1	unitig_2671_Tb427v10	Tb927.1.275	ESAG4 pseudogene	ESAG.pseudo	hypothetical protein, conserved	15	-0.0625	NA	0	0.67	32.86	230	32	32	50	7	6	5	0.93	1.15	1.41	0.79	0.77	0.71	Tb927.1.275,Tb927.2.1260,Tb927.4.130,Tb927.6.100
Tb427_000666900.1-p1-CDS2	Tb427_000666900.1	unitig_1881_Tb427v10	Tb11.v5.1020	retrotransposon hot spot (RHS) protein	RHS	Reverse transcriptase (RNA-dependent DNA polymerase)	25	-0.2274	NA	0	0.81	16.5	99	106	84	54	6	5	8	3.08	3.02	1.52	0.68	0.64	1.14	Tb11.v5.1020,Tb927.1.240,Tb927.1.500,Tb927.10.16200,Tb927.11.18610,Tb927.11.18630
Tb427_000576800.1-p1-CDS1	Tb427_000576800.1	Chr9_3A_Tb427v10	Tb11.v5.1020	retrotransposon hot spot (RHS) protein	RHS	hypothetical protein, conserved	22	0.1654	NA	0	1.42	2	14	41	54	50	7	11	12	1.19	1.94	1.41	0.79	1.42	1.71	Tb11.v5.1020,Tb927.1.240,Tb927.1.500,Tb927.10.16200,Tb927.11.18610,Tb927.11.18630
Tb427_000796400.1-p1-CDS3	Tb427_000796400.1	unitig_2582_Tb427v10	Tb11.v5.0349	DNA-directed RNA polymerase II subunit 2	RNA.synthesis	RNA polymerase Rpb2, domain 6	15	0.037	NA	0	0.87	49	196	30	27	62	4	6	8	0.87	0.97	1.75	0.45	0.77	1.14	Tb11.v5.0349,Tb927.1.100,Tb927.2.1110,Tb927.2.1200,Tb927.2.490
Tb427_000698700.1-p1-CDS2	Tb427_000698700.1	unitig_1997_Tb427v10	Tb10.v4.0215	hypothetical protein	ZUnknown	hypothetical protein, conserved	19	-0.2314	NA	0	0.62	81.5	489	77	49	54	6	4	6	2.24	1.76	1.52	0.68	0.52	0.85	Tb10.v4.0215,Tb927.9.15820
Tb427_000759000.1-p1-CDS2	Tb427_000759000.1	unitig_2334_Tb427v10	Tb10.v4.0215	hypothetical protein	ZUnknown	hypothetical protein, conserved	19	-0.24	NA	0	0.61	37.71	264	77	50	50	7	5	5	2.24	1.8	1.41	0.79	0.64	0.71	Tb10.v4.0215,Tb927.9.15820
Tb427_000752800.1-p1-CDS2	Tb427_000752800.1	unitig_2312_Tb427v10	Tb10.v4.0215	hypothetical protein	ZUnknown	hypothetical protein, conserved	17	-0.0787	NA	0	0.73	41.25	330	48	33	46	8	7	5	1.4	1.18	1.3	0.91	0.9	0.71	Tb10.v4.0215,Tb927.9.15820
Tb427_000758600.1-p1-CDS6	Tb427_000758600.1	unitig_2333_Tb427v10	Tb10.v4.0215	hypothetical protein	ZUnknown	hypothetical protein, conserved	19	-0.0279	NA	0	0.92	28.63	229	50	44	46	8	7	8	1.45	1.58	1.3	0.91	0.9	1.14	Tb10.v4.0215,Tb927.9.15820
Tb427_000695500.1-p1-CDS4	Tb427_000695500.1	unitig_1976_Tb427v10	Tb10.v4.0215	hypothetical protein	ZUnknown	hypothetical protein, conserved	21	-0.0204	NA	0	1.04	20.5	164	65	47	46	8	10	7	1.89	1.69	1.3	0.91	1.29	1	Tb10.v4.0215,Tb927.9.15820
Tb427_000825500.1-p1-CDS1	Tb427_000825500.1	unitig_309_Tb427v10	#N/A	#N/A	#N/A	#N/A	21	0.2031	NA	0	1.54	649.5	1299	39	41	70	2	12	13	1.13	1.47	1.98	0.23	1.55	1.85	#N/A
Tb427_000271600.1-p1-CDS1	Tb427_000271600.1	Chr1_5A_Tb427v10	Tb05.5K5.350	ESAG3 pseudogene	ESAG.pseudo	hypothetical protein, conserved	14	-0.0649	NA	0	0.61	1	6	22	33	55	6	5	5	0.64	1.18	1.55	0.68	0.64	0.71	Tb05.5K5.350,Tb05.5K5.420,Tb05.5K5.500,Tb08.27P2.160,Tb08.27P2.250,Tb08.27P2.330,Tb08.27P2.400,Tb08.27P2.520,Tb09.v4.0024,Tb09.v4.0027,Tb09.v4.0033,Tb09.v4.0045,Tb09.v4.0062,Tb09.v4.0083,Tb09.v4.0100,Tb09.v4.0115,Tb09.v4.0130,Tb09.v4.0132,Tb09.v4.0154,Tb09.v4.0160,Tb09.v4.0172,Tb09.v4.0181,Tb09.v4.0201,Tb09.v4.0206,Tb10.v4.0057,Tb10.v4.0066,Tb10.v4.0074,Tb10.v4.0090,Tb10.v4.0101,Tb10.v4.0137,Tb10…
Tb427_000811800.1-p1-CDS1	Tb427_000811800.1	unitig_2963_Tb427v10	Tb05.5K5.350	ESAG3 pseudogene	ESAG.pseudo	hypothetical protein, conserved	14	-0.3095	NA	0	0.31	27.14	190	44	39	51	7	2	3	1.28	1.4	1.44	0.79	0.26	0.43	Tb05.5K5.350,Tb05.5K5.420,Tb05.5K5.500,Tb08.27P2.160,Tb08.27P2.250,Tb08.27P2.330,Tb08.27P2.400,Tb08.27P2.520,Tb09.v4.0024,Tb09.v4.0027,Tb09.v4.0033,Tb09.v4.0045,Tb09.v4.0062,Tb09.v4.0083,Tb09.v4.0100,Tb09.v4.0115,Tb09.v4.0130,Tb09.v4.0132,Tb09.v4.0154,Tb09.v4.0160,Tb09.v4.0172,Tb09.v4.0181,Tb09.v4.0201,Tb09.v4.0206,Tb10.v4.0057,Tb10.v4.0066,Tb10.v4.0074,Tb10.v4.0090,Tb10.v4.0101,Tb10.v4.0137,Tb10…
Tb427_000707200.1-p1-CDS8	Tb427_000707200.1	unitig_2085_Tb427v10	Tb927.2.300	DNA-directed RNA polymerase, pseudogene	Pseudogene	RNA polymerase Rpb2, domain 4/RNA polymerase Rpb2, domain 6	20	0.0604	NA	0	1.14	76	456	47	49	55	6	12	7	1.37	1.76	1.55	0.68	1.55	1	Tb927.2.300,Tb927.2.420,Tb927.2.460,Tb927.2.540,Tb927.4.230,Tb927.6.5190
Tb427_000729600.1-p1-CDS3	Tb427_000729600.1	unitig_2196_Tb427v10	Tb11.v5.1020	retrotransposon hot spot (RHS) protein	RHS	Reverse transcriptase (RNA-dependent DNA polymerase)	36	-0.1979	NA	0	1.09	30.25	121	150	159	63	4	9	9	4.36	5.71	1.78	0.45	1.16	1.28	Tb11.v5.1020,Tb927.1.240,Tb927.1.500,Tb927.10.16200,Tb927.11.18610,Tb927.11.18630
Tb427_000738100.1-p1-CDS3	Tb427_000738100.1	unitig_2217_Tb427v10	Tb09.v4.0013	retrotransposon hot spot (RHS) protein	RHS	Retrotransposon hot spot protein	18	-0.0861	NA	0	0.81	59.83	359	46	52	55	6	3	10	1.34	1.87	1.55	0.68	0.39	1.42	Tb09.v4.0013,Tb09.v4.0067,Tb11.0820,Tb11.1780,Tb11.v5.0214,Tb11.v5.0294,Tb11.v5.0295,Tb11.v5.0325,Tb11.v5.0326,Tb11.v5.0353,Tb11.v5.0489,Tb11.v5.0532,Tb11.v5.0533,Tb11.v5.0594,Tb11.v5.0624,Tb11.v5.0670,Tb11.v5.0693,Tb11.v5.0839,Tb927.1.120,Tb927.1.180,Tb927.1.190,Tb927.1.220,Tb927.1.70,Tb927.1.90,Tb927.10.110,Tb927.10.70,Tb927.2.100,Tb927.2.1120,Tb927.2.1180,Tb927.2.1210,Tb927.2.270,Tb927.2.280,T…
Tb427_000591000.1-p1-CDS1	Tb427_000591000.1	Chr9_3A_Tb427v10	Tb11.v5.1020	retrotransposon hot spot (RHS) protein	RHS	RNase H	20	-0.1082	NA	0	0.84	68	408	72	43	55	6	8	6	2.09	1.54	1.55	0.68	1.03	0.85	Tb11.v5.1020,Tb927.1.240,Tb927.1.500,Tb927.10.16200,Tb927.11.18610,Tb927.11.18630
Tb427_000105100.1-p1-CDS1	Tb427_000105100.1	Chr10_3B_Tb427v10	Tb11.v5.1020	retrotransposon hot spot (RHS) protein	RHS	Endonuclease-reverse transcriptase	17	-0.0217	NA	0	0.78	21.44	193	36	35	43	9	8	5	1.05	1.26	1.21	1.02	1.03	0.71	Tb11.v5.1020,Tb927.1.240,Tb927.1.500,Tb927.10.16200,Tb927.11.18610,Tb927.11.18630
Tb427_000703700.1-p1-CDS1	Tb427_000703700.1	unitig_2078_Tb427v10	Tb927.9.780	hypothetical protein	ZUnknown	hypothetical protein, conserved	21	-0.13	NA	0	0.85	44.33	133	76	58	67	3	7	7	2.21	2.08	1.89	0.34	0.9	1	Tb927.9.780
Tb427_050046800.1-p1-CDS1	Tb427_050046800.1	Chr5_core_Tb427v10	Tb927.5.4000	hypothetical protein	ZUnknown	hypothetical protein, conserved	16	-0.2606	NA	0	0.43	1	4	67	39	63	4	3	4	1.95	1.4	1.78	0.45	0.39	0.57	Tb927.5.4000
Tb427_000712200.1-p1-CDS4	Tb427_000712200.1	unitig_2120_Tb427v10	Tb927.2.300	DNA-directed RNA polymerase, pseudogene	Pseudogene	RNA polymerase Rpb2, domain 4/RNA polymerase Rpb2, domain 6	18	-0.1504	NA	0	0.68	44.2	221	71	35	59	5	4	7	2.06	1.26	1.67	0.57	0.52	1	Tb927.2.300,Tb927.2.420,Tb927.2.460,Tb927.2.540,Tb927.4.230,Tb927.6.5190
Tb427_000645900.1-p1-CDS1	Tb427_000645900.1	unitig_1837_Tb427v10	Tb927.11.17840	retrotransposon hot spot protein (RHS, pseudogene)	RHS	Retrotransposon hot spot protein	16	-0.1736	NA	0	0.55	17.38	139	46	36	47	8	3	6	1.34	1.29	1.33	0.91	0.39	0.85	Tb927.11.17840,Tb927.2.720,Tb927.2.980,Tb927.4.190,Tb927.5.160
Tb427_000378700.1-p1-CDS8	Tb427_000378700.1	Chr6_3A_Tb427v10	Tb11.v5.0349	DNA-directed RNA polymerase II subunit 2	RNA.synthesis	RNA polymerase Rpb2, domain 5/RNA polymerase Rpb2, domain 6	17	-0.0008	NA	0	0.85	28.5	228	41	33	47	8	7	7	1.19	1.18	1.33	0.91	0.9	1	Tb11.v5.0349,Tb927.1.100,Tb927.2.1110,Tb927.2.1200,Tb927.2.490
Tb427_000814300.1-p1-CDS3	Tb427_000814300.1	unitig_3005_Tb427v10	Tb927.1.400	hypothetical protein, conserved	ZUnknown	hypothetical protein, conserved	16	-0.1218	NA	0	0.62	12.25	98	44	32	47	8	3	7	1.28	1.15	1.33	0.91	0.39	1	Tb927.1.400
Tb427_000780400.1-p1-CDS2	Tb427_000780400.1	unitig_2489_Tb427v10	Tb927.1.400	hypothetical protein, conserved	ZUnknown	hypothetical protein, conserved	22	0.2207	NA	0	1.47	16.5	132	47	43	47	8	9	15	1.37	1.54	1.33	0.91	1.16	2.13	Tb927.1.400
Tb427_000808600.1-p1-CDS4	Tb427_000808600.1	unitig_284_Tb427v10	Tb927.2.300	DNA-directed RNA polymerase, pseudogene	Pseudogene	RNA polymerase Rpb2, domain 4/RNA polymerase Rpb2, domain 6	19	0.0229	NA	0	0.96	31.44	283	46	40	44	9	7	9	1.34	1.44	1.24	1.02	0.9	1.28	Tb927.2.300,Tb927.2.420,Tb927.2.460,Tb927.2.540,Tb927.4.230,Tb927.6.5190
Tb427_000046700.1-p1-CDS3	Tb427_000046700.1	Chr10_3A_Tb427v10	Tb11.v5.1020	retrotransposon hot spot (RHS) protein	RHS	Reverse transcriptase (RNA-dependent DNA polymerase)	16	-0.1375	NA	0	0.62	30.71	215	53	30	52	7	3	7	1.54	1.08	1.47	0.79	0.39	1	Tb11.v5.1020,Tb927.1.240,Tb927.1.500,Tb927.10.16200,Tb927.11.18610,Tb927.11.18630
Tb427_000578400.1-p1-CDS1	Tb427_000578400.1	Chr9_3A_Tb427v10	Tb11.v5.1020	retrotransposon hot spot (RHS) protein	RHS	hypothetical protein, conserved	18	-0.074	NA	0	0.77	2	14	33	55	52	7	7	6	0.96	1.97	1.47	0.79	0.9	0.85	Tb11.v5.1020,Tb927.1.240,Tb927.1.500,Tb927.10.16200,Tb927.11.18610,Tb927.11.18630
Tb427_000255900.1-p1-CDS4	Tb427_000255900.1	Chr1_3B_Tb427v10	Tb11.v5.1020	retrotransposon hot spot (RHS) protein	RHS	Reverse transcriptase (RNA-dependent DNA polymerase)	19	-0.0494	NA	0	0.88	26.43	185	61	39	52	7	11	4	1.77	1.4	1.47	0.79	1.42	0.57	Tb11.v5.1020,Tb927.1.240,Tb927.1.500,Tb927.10.16200,Tb927.11.18610,Tb927.11.18630
Tb427_000548800.1-p1-CDS1	Tb427_000548800.1	Chr8_5B_Tb427v10	Tb11.v5.1020	retrotransposon hot spot (RHS) protein	RHS	Endonuclease-reverse transcriptase	15	0.0725	NA	0	0.84	17.44	157	26	22	44	9	7	7	0.76	0.79	1.24	1.02	0.9	1	Tb11.v5.1020,Tb927.1.240,Tb927.1.500,Tb927.10.16200,Tb927.11.18610,Tb927.11.18630
Tb427_000722400.1-p1-CDS3	Tb427_000722400.1	unitig_2168_Tb427v10	Tb10.v4.0215	hypothetical protein	ZUnknown	hypothetical protein, conserved	20	-0.0589	NA	0	0.96	39.6	198	69	46	60	5	8	8	2.01	1.65	1.69	0.57	1.03	1.14	Tb10.v4.0215,Tb927.9.15820
Tb427_000744000.1-p1-CDS1	Tb427_000744000.1	unitig_2228_Tb427v10	Tb10.v4.0215	hypothetical protein	ZUnknown	hypothetical protein, conserved	17	-0.2953	NA	0	0.4	20.29	142	59	49	52	7	6	1	1.72	1.76	1.47	0.79	0.77	0.14	Tb10.v4.0215,Tb927.9.15820
Tb427_000725200.1-p1-CDS1	Tb427_000725200.1	unitig_2171_Tb427v10	Tb927.1.490	hypothetical protein	ZUnknown	hypothetical protein, conserved	17	-0.134	NA	0	0.62	44.71	313	52	36	52	7	1	9	1.51	1.29	1.47	0.79	0.13	1.28	Tb927.1.490,Tb927.4.180,Tb927.9.740
Tb427_000725500.1-p1-CDS1	Tb427_000725500.1	unitig_2174_Tb427v10	Tb927.1.490	hypothetical protein	ZUnknown	hypothetical protein, conserved	21	-0.0367	NA	0	1.02	75.75	303	61	54	64	4	9	8	1.77	1.94	1.81	0.45	1.16	1.14	Tb927.1.490,Tb927.4.180,Tb927.9.740
Tb427_000735100.1-p1-CDS2	Tb427_000735100.1	unitig_2216_Tb427v10	Tb05.5K5.180	GRESAG 4 receptor-type adenylate cyclase	GRESAG	Adenylate and Guanylate cyclase catalytic domain containing protein	19	-0.1234	NA	0	0.77	16.88	135	63	44	48	8	7	6	1.83	1.58	1.36	0.91	0.9	0.85	Tb05.5K5.180,Tb05.5K5.190,Tb09.v4.0009,Tb11.v5.0209,Tb11.v5.0217,Tb11.v5.0281,Tb11.v5.0379,Tb11.v5.0380,Tb11.v5.0424,Tb11.v5.0425,Tb11.v5.0429,Tb11.v5.0431,Tb11.v5.0456,Tb11.v5.0470,Tb11.v5.0484,Tb11.v5.0546,Tb11.v5.0576,Tb11.v5.0654,Tb11.v5.0784,Tb11.v5.0821,Tb11.v5.0830,Tb11.v5.0864,Tb11.v5.0865,Tb11.v5.1015,Tb11.v5.1016,Tb927.10.13040,Tb927.10.16000,Tb927.10.16190,Tb927.10.2430,Tb927.11.13740,…
Tb427_000780200.1-p1-CDS6	Tb427_000780200.1	unitig_2489_Tb427v10	Tb05.5K5.180	GRESAG 4 receptor-type adenylate cyclase	GRESAG	Adenylate and Guanylate cyclase catalytic domain containing protein	23	0.2055	NA	0	1.44	21.5	172	49	46	48	8	12	12	1.43	1.65	1.36	0.91	1.55	1.71	Tb05.5K5.180,Tb05.5K5.190,Tb09.v4.0009,Tb11.v5.0209,Tb11.v5.0217,Tb11.v5.0281,Tb11.v5.0379,Tb11.v5.0380,Tb11.v5.0424,Tb11.v5.0425,Tb11.v5.0429,Tb11.v5.0431,Tb11.v5.0456,Tb11.v5.0470,Tb11.v5.0484,Tb11.v5.0546,Tb11.v5.0576,Tb11.v5.0654,Tb11.v5.0784,Tb11.v5.0821,Tb11.v5.0830,Tb11.v5.0864,Tb11.v5.0865,Tb11.v5.1015,Tb11.v5.1016,Tb927.10.13040,Tb927.10.16000,Tb927.10.16190,Tb927.10.2430,Tb927.11.13740,…
Tb427_000741600.1-p1-CDS2	Tb427_000741600.1	unitig_2222_Tb427v10	Tb927.2.300	DNA-directed RNA polymerase, pseudogene	Pseudogene	RNA polymerase Rpb2, domain 4/RNA polymerase Rpb2, domain 6	17	-0.0684	NA	0	0.72	15	120	42	34	48	8	5	7	1.22	1.22	1.36	0.91	0.64	1	Tb927.2.300,Tb927.2.420,Tb927.2.460,Tb927.2.540,Tb927.4.230,Tb927.6.5190
Tb427_000193000.1-p1-CDS1	Tb427_000193000.1	Chr1_3A_Tb427v10	Tb11.v5.1020	retrotransposon hot spot (RHS) protein	RHS	Endonuclease-reverse transcriptase	18	-0.0369	NA	0	0.82	39.88	319	54	32	48	8	9	5	1.57	1.15	1.36	0.91	1.16	0.71	Tb11.v5.1020,Tb927.1.240,Tb927.1.500,Tb927.10.16200,Tb927.11.18610,Tb927.11.18630
Tb427_000741500.1-p1-CDS1	Tb427_000741500.1	unitig_2222_Tb427v10	Tb09.v4.0066	hypothetical protein	ZUnknown	hypothetical protein, conserved	18	0.118	NA	0	1.08	29.5	236	28	39	48	8	8	10	0.81	1.4	1.36	0.91	1.03	1.42	Tb09.v4.0066,Tb927.1.110
Tb427_000749300.1-p1-CDS3	Tb427_000749300.1	unitig_224_Tb427v10	Tb927.9.15740	hypothetical protein, conserved	ZUnknown	hypothetical protein, conserved	16	-0.1383	NA	0	0.59	2.38	19	43	35	48	8	5	5	1.25	1.26	1.36	0.91	0.64	0.71	Tb927.9.15740,Tb927.9.15770,Tb927.9.15800
Tb427_000812400.1-p1-CDS1	Tb427_000812400.1	unitig_2969_Tb427v10	Tb05.5K5.350	ESAG3 pseudogene	ESAG.pseudo	hypothetical protein, conserved	18	-0.0813	NA	0	0.79	21	189	53	40	45	9	4	9	1.54	1.44	1.27	1.02	0.52	1.28	Tb05.5K5.350,Tb05.5K5.420,Tb05.5K5.500,Tb08.27P2.160,Tb08.27P2.250,Tb08.27P2.330,Tb08.27P2.400,Tb08.27P2.520,Tb09.v4.0024,Tb09.v4.0027,Tb09.v4.0033,Tb09.v4.0045,Tb09.v4.0062,Tb09.v4.0083,Tb09.v4.0100,Tb09.v4.0115,Tb09.v4.0130,Tb09.v4.0132,Tb09.v4.0154,Tb09.v4.0160,Tb09.v4.0172,Tb09.v4.0181,Tb09.v4.0201,Tb09.v4.0206,Tb10.v4.0057,Tb10.v4.0066,Tb10.v4.0074,Tb10.v4.0090,Tb10.v4.0101,Tb10.v4.0137,Tb10…
Tb427_000772900.1-p1-CDS10	Tb427_000772900.1	unitig_2457_Tb427v10	Tb11.v5.1020	retrotransposon hot spot (RHS) protein	RHS	Reverse transcriptase (RNA-dependent DNA polymerase)	18	0.0246	NA	0	0.94	36.25	145	41	37	65	4	9	7	1.19	1.33	1.84	0.45	1.16	1	Tb11.v5.1020,Tb927.1.240,Tb927.1.500,Tb927.10.16200,Tb927.11.18610,Tb927.11.18630
Tb427_000636200.1-p1-CDS1	Tb427_000636200.1	unitig_148_Tb427v10	Tb09.v4.0013	retrotransposon hot spot (RHS) protein	RHS	Retrotransposon hot spot protein	17	0.016	NA	0	0.87	104.5	627	41	32	57	6	10	5	1.19	1.15	1.61	0.68	1.29	0.71	Tb09.v4.0013,Tb09.v4.0067,Tb11.0820,Tb11.1780,Tb11.v5.0214,Tb11.v5.0294,Tb11.v5.0295,Tb11.v5.0325,Tb11.v5.0326,Tb11.v5.0353,Tb11.v5.0489,Tb11.v5.0532,Tb11.v5.0533,Tb11.v5.0594,Tb11.v5.0624,Tb11.v5.0670,Tb11.v5.0693,Tb11.v5.0839,Tb927.1.120,Tb927.1.180,Tb927.1.190,Tb927.1.220,Tb927.1.70,Tb927.1.90,Tb927.10.110,Tb927.10.70,Tb927.2.100,Tb927.2.1120,Tb927.2.1180,Tb927.2.1210,Tb927.2.270,Tb927.2.280,T…
Tb427_000429900.1-p1-CDS1	Tb427_000429900.1	Chr6_3B_Tb427v10	Tb11.v5.1020	retrotransposon hot spot (RHS) protein	RHS	Reverse transcriptase (RNA-dependent DNA polymerase)	23	0.1172	NA	0	1.37	52	312	64	49	57	6	11	12	1.86	1.76	1.61	0.68	1.42	1.71	Tb11.v5.1020,Tb927.1.240,Tb927.1.500,Tb927.10.16200,Tb927.11.18610,Tb927.11.18630
Tb427_000808500.1-p1-CDS2	Tb427_000808500.1	unitig_284_Tb427v10	Tb09.v4.0013	retrotransposon hot spot (RHS) protein	RHS	Retrotransposon hot spot protein	18	-0.1327	NA	0	0.68	37.86	265	52	53	53	7	11	1	1.51	1.9	1.5	0.79	1.42	0.14	Tb09.v4.0013,Tb09.v4.0067,Tb11.0820,Tb11.1780,Tb11.v5.0214,Tb11.v5.0294,Tb11.v5.0295,Tb11.v5.0325,Tb11.v5.0326,Tb11.v5.0353,Tb11.v5.0489,Tb11.v5.0532,Tb11.v5.0533,Tb11.v5.0594,Tb11.v5.0624,Tb11.v5.0670,Tb11.v5.0693,Tb11.v5.0839,Tb927.1.120,Tb927.1.180,Tb927.1.190,Tb927.1.220,Tb927.1.70,Tb927.1.90,Tb927.10.110,Tb927.10.70,Tb927.2.100,Tb927.2.1120,Tb927.2.1180,Tb927.2.1210,Tb927.2.270,Tb927.2.280,T…
Tb427_000674000.1-p1-CDS5	Tb427_000674000.1	unitig_1900_Tb427v10	Tb09.v4.0013	retrotransposon hot spot (RHS) protein	RHS	Retrotransposon hot spot protein	16	-0.1382	NA	0	0.59	22.25	178	40	37	49	8	5	5	1.16	1.33	1.38	0.91	0.64	0.71	Tb09.v4.0013,Tb09.v4.0067,Tb11.0820,Tb11.1780,Tb11.v5.0214,Tb11.v5.0294,Tb11.v5.0295,Tb11.v5.0325,Tb11.v5.0326,Tb11.v5.0353,Tb11.v5.0489,Tb11.v5.0532,Tb11.v5.0533,Tb11.v5.0594,Tb11.v5.0624,Tb11.v5.0670,Tb11.v5.0693,Tb11.v5.0839,Tb927.1.120,Tb927.1.180,Tb927.1.190,Tb927.1.220,Tb927.1.70,Tb927.1.90,Tb927.10.110,Tb927.10.70,Tb927.2.100,Tb927.2.1120,Tb927.2.1180,Tb927.2.1210,Tb927.2.270,Tb927.2.280,T…
Tb427_000779600.1-p1-CDS2	Tb427_000779600.1	unitig_2481_Tb427v10	Tb11.v5.0800	retrotransposon hot spot (RHS) protein	RHS	Retrotransposon hot spot protein	18	0.0927	NA	0	1.01	17.13	137	35	34	49	8	7	10	1.02	1.22	1.38	0.91	0.9	1.42	Tb11.v5.0800,Tb927.2.1100
Tb427_000771900.1-p1-CDS11	Tb427_000771900.1	unitig_2456_Tb427v10	Tb11.v5.1020	retrotransposon hot spot (RHS) protein	RHS	Reverse transcriptase (RNA-dependent DNA polymerase)	16	-0.0805	NA	0	0.65	13.13	105	39	30	49	8	5	6	1.13	1.08	1.38	0.91	0.64	0.85	Tb11.v5.1020,Tb927.1.240,Tb927.1.500,Tb927.10.16200,Tb927.11.18610,Tb927.11.18630
Tb427_000154100.1-p1-CDS1	Tb427_000154100.1	Chr11_3B_Tb427v10	Tb11.v5.1020	retrotransposon hot spot (RHS) protein	RHS	Reverse transcriptase (RNA-dependent DNA polymerase)/RNase H	21	0.1888	NA	0	1.29	43.67	393	55	28	45	9	13	9	1.6	1.01	1.27	1.02	1.68	1.28	Tb11.v5.1020,Tb927.1.240,Tb927.1.500,Tb927.10.16200,Tb927.11.18610,Tb927.11.18630
Tb427_000182000.1-p1-CDS4	Tb427_000182000.1	Chr1_3A_Tb427v10	Tb927.11.18620	variant surface glycoprotein (VSG)	VSG	hypothetical protein, conserved	18	0.0021	NA	0	0.89	24.78	223	49	34	45	9	7	8	1.43	1.22	1.27	1.02	0.9	1.14	Tb927.11.18620,Tb927.11.19850
Tb427_000546200.1-p1-CDS2	Tb427_000546200.1	Chr8_5B_Tb427v10	Tb10.v4.0207	VSG pseudogene	VSG	Trypanosome variant surface glycoprotein (A-type)	13	-0.0677	NA	0	0.53	3.44	31	26	20	45	9	5	4	0.76	0.72	1.27	1.02	0.64	0.57	Tb10.v4.0207,Tb927.11.18590,Tb927.9.17390
Tb427_000773600.1-p1-CDS2	Tb427_000773600.1	unitig_2466_Tb427v10	Tb927.1.490	hypothetical protein	ZUnknown	hypothetical protein, conserved	27	0.0574	NA	0	1.48	67.33	202	93	60	69	3	13	12	2.7	2.15	1.95	0.34	1.68	1.71	Tb927.1.490,Tb927.4.180,Tb927.9.740
Tb427_000695500.1-p1-CDS2	Tb427_000695500.1	unitig_1976_Tb427v10	Tb10.v4.0215	hypothetical protein	ZUnknown	hypothetical protein, conserved	22	-0.1197	NA	0	0.91	43.6	218	82	60	61	5	4	11	2.38	2.15	1.72	0.57	0.52	1.57	Tb10.v4.0215,Tb927.9.15820
Tb427_000680200.1-p1-CDS1	Tb427_000680200.1	unitig_190_Tb427v10	Tb927.1.490	hypothetical protein	ZUnknown	hypothetical protein, conserved	14	-0.2613	NA	0	0.36	36.83	221	42	36	57	6	3	3	1.22	1.29	1.61	0.68	0.39	0.43	Tb927.1.490,Tb927.4.180,Tb927.9.740
Tb427_080058700.1-p1-CDS1	Tb427_080058700.1	Chr8_core_Tb427v10	Tb927.8.5340	hypothetical protein	ZUnknown	hypothetical protein, conserved	19	-0.0334	NA	0	0.89	1	7	48	44	53	7	7	8	1.4	1.58	1.5	0.79	0.9	1.14	Tb927.8.5340
Tb427_000355800.1-p1-CDS1	Tb427_000355800.1	Chr5_3A_Tb427v10	Tb11.v5.0655	trypanosome RHS family	ZUnknown	hypothetical protein, conserved	19	0.1223	NA	0	1.14	19.14	134	50	27	53	7	8	11	1.45	0.97	1.5	0.79	1.03	1.57	Tb11.v5.0655,Tb927.1.430,Tb927.1.450,Tb927.2.1140,Tb927.2.830,Tb927.4.110
Tb427_000822000.1-p1-CDS1	Tb427_000822000.1	unitig_307_Tb427v10	Tb09.v4.0152	hypothetical protein	ZUnknown	hypothetical protein, conserved	18	0.0632	NA	0	0.95	33.63	269	34	35	49	8	8	8	0.99	1.26	1.38	0.91	1.03	1.14	Tb09.v4.0152,Tb927.11.17830,Tb927.9.760
Tb427_000725900.1-p1-CDS3	Tb427_000725900.1	unitig_2174_Tb427v10	Tb10.v4.0215	hypothetical protein	ZUnknown	hypothetical protein, conserved	19	-0.1026	NA	0	0.79	20.56	185	60	42	45	9	4	9	1.75	1.51	1.27	1.02	0.52	1.28	Tb10.v4.0215,Tb927.9.15820
Tb427_000498700.1-p1-CDS3	Tb427_000498700.1	Chr8_3A_Tb427v10	Tb927.2.300	DNA-directed RNA polymerase, pseudogene	Pseudogene	RNA polymerase Rpb2, domain 4	22	0.0175	NA	0	1.1	84.29	590	63	49	54	7	12	7	1.83	1.76	1.52	0.79	1.55	1	Tb927.2.300,Tb927.2.420,Tb927.2.460,Tb927.2.540,Tb927.4.230,Tb927.6.5190
Tb427_060056700.1-p1-CDS2	Tb427_060056700.1	Chr6_core_Tb427v10	Tb09.v4.0013	retrotransposon hot spot (RHS) protein	RHS	Retrotransposon hot spot protein	17	-0.05	NA	0	0.75	7.14	50	38	38	54	7	8	5	1.11	1.36	1.52	0.79	1.03	0.71	Tb09.v4.0013,Tb09.v4.0067,Tb11.0820,Tb11.1780,Tb11.v5.0214,Tb11.v5.0294,Tb11.v5.0295,Tb11.v5.0325,Tb11.v5.0326,Tb11.v5.0353,Tb11.v5.0489,Tb11.v5.0532,Tb11.v5.0533,Tb11.v5.0594,Tb11.v5.0624,Tb11.v5.0670,Tb11.v5.0693,Tb11.v5.0839,Tb927.1.120,Tb927.1.180,Tb927.1.190,Tb927.1.220,Tb927.1.70,Tb927.1.90,Tb927.10.110,Tb927.10.70,Tb927.2.100,Tb927.2.1120,Tb927.2.1180,Tb927.2.1210,Tb927.2.270,Tb927.2.280,T…
Tb427_000057800.1-p1-CDS3	Tb427_000057800.1	Chr10_3A_Tb427v10	Tb11.v5.0349	DNA-directed RNA polymerase II subunit 2	RNA.synthesis	RNA polymerase Rpb2, domain 6	18	-0.1248	NA	0	0.71	74.57	522	64	34	54	7	5	7	1.86	1.22	1.52	0.79	0.64	1	Tb11.v5.0349,Tb927.1.100,Tb927.2.1110,Tb927.2.1200,Tb927.2.490
Tb427_000304400.1-p1-CDS3	Tb427_000304400.1	Chr3_5B_Tb427v10	Tb09.v4.0065	ESAG1	ESAG	ESAG protein	21	0.0575	NA	0	1.16	1	3	58	43	70	3	13	7	1.69	1.54	1.98	0.34	1.68	1	Tb09.v4.0065,Tb10.v4.0213,Tb10.v4.0218,Tb11.1020,Tb927.1.5200,Tb927.1.5240,Tb927.10.20,Tb927.11.17890,Tb927.11.18650,Tb927.4.1200,Tb927.9.660,Tb927.9.7350
Tb427_000834100.1-p1-CDS1	Tb427_000834100.1	unitig_407_Tb427v10	Tb05.5K5.180	GRESAG 4 receptor-type adenylate cyclase	GRESAG	Adenylate and Guanylate cyclase catalytic domain containing protein	22	0.1485	NA	0	1.28	43.38	347	60	36	50	8	12	10	1.75	1.29	1.41	0.91	1.55	1.42	Tb05.5K5.180,Tb05.5K5.190,Tb09.v4.0009,Tb11.v5.0209,Tb11.v5.0217,Tb11.v5.0281,Tb11.v5.0379,Tb11.v5.0380,Tb11.v5.0424,Tb11.v5.0425,Tb11.v5.0429,Tb11.v5.0431,Tb11.v5.0456,Tb11.v5.0470,Tb11.v5.0484,Tb11.v5.0546,Tb11.v5.0576,Tb11.v5.0654,Tb11.v5.0784,Tb11.v5.0821,Tb11.v5.0830,Tb11.v5.0864,Tb11.v5.0865,Tb11.v5.1015,Tb11.v5.1016,Tb927.10.13040,Tb927.10.16000,Tb927.10.16190,Tb927.10.2430,Tb927.11.13740,…
Tb427_000757100.1-p1-CDS1	Tb427_000757100.1	unitig_2332_Tb427v10	Tb927.5.296b	hypothetical protein, Zinc finger domain, MOP domain	ZUnknown	hypothetical protein	21	-0.0198	NA	0	1	53	159	65	45	70	3	7	10	1.89	1.62	1.98	0.34	0.9	1.42	Tb927.5.296b
Tb427_000691500.1-p1-CDS3	Tb427_000691500.1	unitig_1962_Tb427v10	Tb10.v4.0215	hypothetical protein	ZUnknown	hypothetical protein, conserved	21	-0.2046	NA	0	0.7	41.33	248	85	51	58	6	6	6	2.47	1.83	1.64	0.68	0.77	0.85	Tb10.v4.0215,Tb927.9.15820
Tb427_020005000.1-p1-CDS4	Tb427_020005000.1	Chr2_core_Tb427v10	Tb10.v4.0258	hypothetical protein	ZUnknown	hypothetical protein	21	0.0907	NA	0	1.21	1	6	58	35	58	6	4	16	1.69	1.26	1.64	0.68	0.52	2.28	Tb10.v4.0258
Tb427_000271600.1-p1-CDS6	Tb427_000271600.1	Chr1_5A_Tb427v10	Tb05.5K5.350	ESAG3 pseudogene	ESAG.pseudo	hypothetical protein, conserved	15	-0.0393	NA	0	0.64	1	9	35	21	46	9	6	5	1.02	0.75	1.3	1.02	0.77	0.71	Tb05.5K5.350,Tb05.5K5.420,Tb05.5K5.500,Tb08.27P2.160,Tb08.27P2.250,Tb08.27P2.330,Tb08.27P2.400,Tb08.27P2.520,Tb09.v4.0024,Tb09.v4.0027,Tb09.v4.0033,Tb09.v4.0045,Tb09.v4.0062,Tb09.v4.0083,Tb09.v4.0100,Tb09.v4.0115,Tb09.v4.0130,Tb09.v4.0132,Tb09.v4.0154,Tb09.v4.0160,Tb09.v4.0172,Tb09.v4.0181,Tb09.v4.0201,Tb09.v4.0206,Tb10.v4.0057,Tb10.v4.0066,Tb10.v4.0074,Tb10.v4.0090,Tb10.v4.0101,Tb10.v4.0137,Tb10…
Tb427_000649700.1-p1-CDS4	Tb427_000649700.1	unitig_1843_Tb427v10	Tb09.v4.0041	leucine-rich repeat protein LRRP, pseudogene	LRRP	hypothetical protein, conserved	17	-0.2604	NA	0	0.46	10.22	92	59	41	46	9	5	3	1.72	1.47	1.3	1.02	0.64	0.43	Tb09.v4.0041,Tb11.v5.0448,Tb11.v5.0551,Tb11.v5.0560,Tb11.v5.0602,Tb11.v5.0703,Tb11.v5.0838,Tb927.1.290,Tb927.1.370,Tb927.1.480,Tb927.11.1500,Tb927.11.1510,Tb927.2.1310,Tb927.2.170,Tb927.2.690,Tb927.2.950,Tb927.3.1490,Tb927.4.160,Tb927.6.130,Tb927.7.7540,Tb927.9.14540
Tb427_000105600.1-p1-CDS1	Tb427_000105600.1	Chr10_3B_Tb427v10	Tb11.v5.1020	retrotransposon hot spot (RHS) protein	RHS	Endonuclease-reverse transcriptase	21	0.1378	NA	0	1.26	28.44	256	49	39	46	9	5	16	1.43	1.4	1.3	1.02	0.64	2.28	Tb11.v5.1020,Tb927.1.240,Tb927.1.500,Tb927.10.16200,Tb927.11.18610,Tb927.11.18630
Tb427_050010400.1-p1-CDS2	Tb427_050010400.1	Chr5_core_Tb427v10	Tb09.v4.0153	hypothetical protein	ZUnknown	hypothetical protein, conserved	18	-0.0771	NA	0	0.78	1.11	10	49	41	46	9	4	9	1.43	1.47	1.3	1.02	0.52	1.28	Tb09.v4.0153
Tb427_000274000.1-p1-CDS5	Tb427_000274000.1	Chr1_5A_Tb427v10	Tb11.v5.0317	hypothetical protein, conserved	ZUnknown	hypothetical protein, conserved	17	-0.041	NA	0	0.75	12.89	116	49	28	46	9	7	6	1.43	1.01	1.3	1.02	0.9	0.85	Tb11.v5.0317,Tb11.v5.0855,Tb927.1.350,Tb927.11.18020,Tb927.11.3560,Tb927.11.7980
Tb427_000754900.1-p1-CDS1	Tb427_000754900.1	unitig_2332_Tb427v10	Tb10.v4.0215	hypothetical protein	ZUnknown	hypothetical protein, conserved	21	0.051	NA	0	1.12	17	119	66	36	55	7	6	13	1.92	1.29	1.55	0.79	0.77	1.85	Tb10.v4.0215,Tb927.9.15820
Tb427_000424300.1-p1-CDS1	Tb427_000424300.1	Chr6_3B_Tb427v10	Tb11.v5.1020	retrotransposon hot spot (RHS) protein	RHS	Reverse transcriptase (RNA-dependent DNA polymerase)	18	-0.0623	NA	0	0.75	18.3	183	49	35	43	10	6	7	1.43	1.26	1.21	1.14	0.77	1	Tb11.v5.1020,Tb927.1.240,Tb927.1.500,Tb927.10.16200,Tb927.11.18610,Tb927.11.18630
Tb427_000299100.1-p1-CDS3	Tb427_000299100.1	Chr3_5A_Tb427v10	Tb927.11.18620	variant surface glycoprotein (VSG)	VSG	hypothetical protein, conserved	18	0.0894	NA	0	0.97	29.78	268	44	26	47	9	10	7	1.28	0.93	1.33	1.02	1.29	1	Tb927.11.18620,Tb927.11.19850
Tb427_000832100.1-p1-CDS1	Tb427_000832100.1	unitig_348_Tb427v10	Tb10.v4.0215	hypothetical protein	ZUnknown	hypothetical protein, conserved	23	-0.1082	NA	0	0.93	21.2	106	79	60	63	5	6	10	2.3	2.15	1.78	0.57	0.77	1.42	Tb10.v4.0215,Tb927.9.15820
Tb427_080020400.1-p1-CDS4	Tb427_080020400.1	Chr8_core_Tb427v10	Tb927.8.1760	hypothetical protein	ZUnknown	hypothetical protein, conserved	24	-0.2323	NA	0	0.75	1	6	99	74	59	6	6	7	2.88	2.66	1.67	0.68	0.77	1	Tb927.8.1760
Tb427_000693500.1-p1-CDS4	Tb427_000693500.1	unitig_1969_Tb427v10	Tb10.v4.0215	hypothetical protein	ZUnknown	hypothetical protein, conserved	18	-0.2529	NA	0	0.51	22	198	52	59	47	9	5	4	1.51	2.12	1.33	1.02	0.64	0.57	Tb10.v4.0215,Tb927.9.15820
Tb427_090050000.1-p1-CDS1	Tb427_090050000.1	Chr9_core_Tb427v10	#N/A	#N/A	#N/A	#N/A	18	-0.1654	NA	0	0.61	1	5	63	43	63	5	9	2	1.83	1.54	1.78	0.57	1.16	0.28	#N/A
Tb427_000791600.1-p1-CDS1	Tb427_000791600.1	unitig_2568_Tb427v10	#N/A	#N/A	#N/A	#N/A	19	-0.0815	NA	0	0.79	156.5	1252	59	40	51	8	10	4	1.72	1.44	1.44	0.91	1.29	0.57	#N/A
Tb427_000820500.1-p1-CDS6	Tb427_000820500.1	unitig_3048_Tb427v10	Tb05.5K5.180	GRESAG 4 receptor-type adenylate cyclase	GRESAG	Adenylate and Guanylate cyclase catalytic domain containing protein	19	-0.12	NA	0	0.73	50	300	70	36	60	6	8	5	2.04	1.29	1.69	0.68	1.03	0.71	Tb05.5K5.180,Tb05.5K5.190,Tb09.v4.0009,Tb11.v5.0209,Tb11.v5.0217,Tb11.v5.0281,Tb11.v5.0379,Tb11.v5.0380,Tb11.v5.0424,Tb11.v5.0425,Tb11.v5.0429,Tb11.v5.0431,Tb11.v5.0456,Tb11.v5.0470,Tb11.v5.0484,Tb11.v5.0546,Tb11.v5.0576,Tb11.v5.0654,Tb11.v5.0784,Tb11.v5.0821,Tb11.v5.0830,Tb11.v5.0864,Tb11.v5.0865,Tb11.v5.1015,Tb11.v5.1016,Tb927.10.13040,Tb927.10.16000,Tb927.10.16190,Tb927.10.2430,Tb927.11.13740,…
Tb427_000835700.1-p1-CDS7	Tb427_000835700.1	unitig_427_Tb427v10	Tb927.2.300	DNA-directed RNA polymerase, pseudogene	Pseudogene	RNA polymerase Rpb2, domain 4/RNA polymerase Rpb2, domain 6	26	0.0783	NA	0	1.44	19.67	59	90	51	72	3	10	15	2.62	1.83	2.03	0.34	1.29	2.13	Tb927.2.300,Tb927.2.420,Tb927.2.460,Tb927.2.540,Tb927.4.230,Tb927.6.5190
Tb427_000735500.1-p1-CDS3	Tb427_000735500.1	unitig_2216_Tb427v10	Tb927.2.300	DNA-directed RNA polymerase, pseudogene	Pseudogene	RNA polymerase Rpb2, domain 4	17	-0.1775	NA	0	0.58	4.67	28	50	41	60	6	4	6	1.45	1.47	1.69	0.68	0.52	0.85	Tb927.2.300,Tb927.2.420,Tb927.2.460,Tb927.2.540,Tb927.4.230,Tb927.6.5190
Tb427_000775600.1-p1-CDS3	Tb427_000775600.1	unitig_2467_Tb427v10	Tb09.v4.0013	retrotransposon hot spot (RHS) protein	RHS	Retrotransposon hot spot protein	18	-0.0073	NA	0	0.86	29.17	175	45	35	60	6	7	8	1.31	1.26	1.69	0.68	0.9	1.14	Tb09.v4.0013,Tb09.v4.0067,Tb11.0820,Tb11.1780,Tb11.v5.0214,Tb11.v5.0294,Tb11.v5.0295,Tb11.v5.0325,Tb11.v5.0326,Tb11.v5.0353,Tb11.v5.0489,Tb11.v5.0532,Tb11.v5.0533,Tb11.v5.0594,Tb11.v5.0624,Tb11.v5.0670,Tb11.v5.0693,Tb11.v5.0839,Tb927.1.120,Tb927.1.180,Tb927.1.190,Tb927.1.220,Tb927.1.70,Tb927.1.90,Tb927.10.110,Tb927.10.70,Tb927.2.100,Tb927.2.1120,Tb927.2.1180,Tb927.2.1210,Tb927.2.270,Tb927.2.280,T…
Tb427_000515900.1-p1-CDS4	Tb427_000515900.1	Chr8_5A_Tb427v10	Tb11.v5.0985	variant surface glycoprotein (VSG)-related	VSG	Trypanosomal VSG domain containing protein	16	-0.3192	NA	0	0.35	3	21	50	45	56	7	3	3	1.45	1.62	1.58	0.79	0.39	0.43	Tb11.v5.0985,Tb927.5.130
Tb427_000676600.1-p1-CDS1	Tb427_000676600.1	unitig_1903_Tb427v10	Tb927.1.490	hypothetical protein	ZUnknown	hypothetical protein, conserved	23	-0.031	NA	0	1.08	35.29	247	77	54	56	7	11	8	2.24	1.94	1.58	0.79	1.42	1.14	Tb927.1.490,Tb927.4.180,Tb927.9.740
Tb427_000786700.1-p1-CDS1	Tb427_000786700.1	unitig_2512_Tb427v10	#N/A	#N/A	#N/A	#N/A	21	0.068	NA	0	1.08	186.14	1303	46	45	56	7	11	8	1.34	1.62	1.58	0.79	1.42	1.14	#N/A
Tb427_000304400.1-p1-CDS1	Tb427_000304400.1	Chr3_5B_Tb427v10	Tb09.v4.0065	ESAG1	ESAG	ESAG protein	16	-0.0166	NA	0	0.7	1	10	28	29	44	10	4	8	0.81	1.04	1.24	1.14	0.52	1.14	Tb09.v4.0065,Tb10.v4.0213,Tb10.v4.0218,Tb11.1020,Tb927.1.5200,Tb927.1.5240,Tb927.10.20,Tb927.11.17890,Tb927.11.18650,Tb927.4.1200,Tb927.9.660,Tb927.9.7350
Tb427_000228400.1-p1-CDS1	Tb427_000228400.1	Chr1_3A_Tb427v10	Tb05.5K5.350	ESAG3 pseudogene	ESAG.pseudo	hypothetical protein	23	0.1925	NA	0	1.43	289.2	1446	64	31	64	5	12	13	1.86	1.11	1.81	0.57	1.55	1.85	Tb05.5K5.350,Tb05.5K5.420,Tb05.5K5.500,Tb08.27P2.160,Tb08.27P2.250,Tb08.27P2.330,Tb08.27P2.400,Tb08.27P2.520,Tb09.v4.0024,Tb09.v4.0027,Tb09.v4.0033,Tb09.v4.0045,Tb09.v4.0062,Tb09.v4.0083,Tb09.v4.0100,Tb09.v4.0115,Tb09.v4.0130,Tb09.v4.0132,Tb09.v4.0154,Tb09.v4.0160,Tb09.v4.0172,Tb09.v4.0181,Tb09.v4.0201,Tb09.v4.0206,Tb10.v4.0057,Tb10.v4.0066,Tb10.v4.0074,Tb10.v4.0090,Tb10.v4.0101,Tb10.v4.0137,Tb10…
Tb427_000579700.1-p1-CDS2	Tb427_000579700.1	Chr9_3A_Tb427v10	Tb927.9.16040	leucine-rich repeat protein LRRP, pseudogene	LRRP	hypothetical protein, conserved	20	-0.1433	NA	0	0.73	3.25	26	80	38	52	8	8	5	2.33	1.36	1.47	0.91	1.03	0.71	Tb927.9.16040
Tb427_000740600.1-p1-CDS4	Tb427_000740600.1	unitig_2219_Tb427v10	Tb09.v4.0041	leucine-rich repeat protein LRRP, pseudogene	LRRP	Leucine Rich repeat	19	0.0144	NA	0	0.93	15.56	140	42	43	48	9	5	11	1.22	1.54	1.36	1.02	0.64	1.57	Tb09.v4.0041,Tb11.v5.0448,Tb11.v5.0551,Tb11.v5.0560,Tb11.v5.0602,Tb11.v5.0703,Tb11.v5.0838,Tb927.1.290,Tb927.1.370,Tb927.1.480,Tb927.11.1500,Tb927.11.1510,Tb927.2.1310,Tb927.2.170,Tb927.2.690,Tb927.2.950,Tb927.3.1490,Tb927.4.160,Tb927.6.130,Tb927.7.7540,Tb927.9.14540
Tb427_000660800.1-p1-CDS6	Tb427_000660800.1	unitig_1859_Tb427v10	Tb927.2.300	DNA-directed RNA polymerase, pseudogene	Pseudogene	RNA polymerase Rpb2, domain 4	19	-0.0632	NA	0	0.8	37	333	44	47	48	9	7	7	1.28	1.69	1.36	1.02	0.9	1	Tb927.2.300,Tb927.2.420,Tb927.2.460,Tb927.2.540,Tb927.4.230,Tb927.6.5190
Tb427_000738500.1-p1-CDS5	Tb427_000738500.1	unitig_2218_Tb427v10	Tb927.1.410	retrotransposon hot spot protein (RHS, pseudogene)	RHS	Retrotransposon hot spot protein	16	-0.293	NA	0	0.33	24	120	63	38	64	5	5	1	1.83	1.36	1.81	0.57	0.64	0.14	Tb927.1.410,Tb927.6.150
Tb427_000074400.1-p1-CDS1	Tb427_000074400.1	Chr10_3A_Tb427v10	Tb11.v5.1020	retrotransposon hot spot (RHS) protein	RHS	RNase H	17	-0.1154	NA	0	0.64	16.3	163	50	32	44	10	4	7	1.45	1.15	1.24	1.14	0.52	1	Tb11.v5.1020,Tb927.1.240,Tb927.1.500,Tb927.10.16200,Tb927.11.18610,Tb927.11.18630
Tb427_070070800.1-p1-CDS2	Tb427_070070800.1	Chr7_core_Tb427v10	Tb927.7.6500	variant surface glycoprotein (VSG)	VSG	Trypanosome variant surface glycoprotein C-terminal domain containing protein	14	-0.0537	NA	0	0.56	1.44	13	24	24	48	9	6	4	0.7	0.86	1.36	1.02	0.77	0.57	Tb927.7.6500
Tb427_000819700.1-p1-CDS2	Tb427_000819700.1	unitig_303_Tb427v10	Tb10.v4.0215	hypothetical protein	ZUnknown	hypothetical protein, conserved	23	-0.1074	NA	0	0.96	43.6	218	81	65	64	5	10	7	2.36	2.33	1.81	0.57	1.29	1	Tb10.v4.0215,Tb927.9.15820
Tb427_000657500.1-p1-CDS1	Tb427_000657500.1	unitig_1857_Tb427v10	Tb927.1.490	hypothetical protein	ZUnknown	hypothetical protein, conserved	21	-0.0777	NA	0	0.92	51.4	257	67	54	64	5	6	10	1.95	1.94	1.81	0.57	0.77	1.42	Tb927.1.490,Tb927.4.180,Tb927.9.740
Tb427_000672600.1-p1-CDS1	Tb427_000672600.1	unitig_1898_Tb427v10	Tb927.1.490	hypothetical protein	ZUnknown	hypothetical protein, conserved	21	-0.119	NA	0	0.85	32	256	69	55	52	8	8	7	2.01	1.97	1.47	0.91	1.03	1	Tb927.1.490,Tb927.4.180,Tb927.9.740
Tb427_090092600.1-p1-CDS1	Tb427_090092600.1	Chr9_core_Tb427v10	Tb927.9.15740	hypothetical protein, conserved	ZUnknown	hypothetical protein, conserved	17	-0.0242	NA	0	0.76	2	16	33	36	52	8	3	10	0.96	1.29	1.47	0.91	0.39	1.42	Tb927.9.15740,Tb927.9.15770,Tb927.9.15800
Tb427_000691500.1-p1-CDS1	Tb427_000691500.1	unitig_1962_Tb427v10	Tb10.v4.0215	hypothetical protein	ZUnknown	hypothetical protein, conserved	15	-0.3255	NA	0	0.27	11.56	104	49	41	48	9	5	0	1.43	1.47	1.36	1.02	0.64	0	Tb10.v4.0215,Tb927.9.15820
Tb427_000221900.1-p1-CDS1	Tb427_000221900.1	Chr1_3A_Tb427v10	Tb10.v4.0215	hypothetical protein	ZUnknown	hypothetical protein, conserved	18	-0.18	NA	0	0.63	15.22	137	54	48	48	9	5	6	1.57	1.72	1.36	1.02	0.64	0.85	Tb10.v4.0215,Tb927.9.15820
Tb427_000347600.1-p1-CDS9	Tb427_000347600.1	Chr4_5B_Tb427v10	Tb05.5K5.180	GRESAG 4 receptor-type adenylate cyclase	GRESAG	Adenylate and Guanylate cyclase catalytic domain containing protein	24	0.1202	NA	0	1.39	34	136	77	42	69	4	16	9	2.24	1.51	1.95	0.45	2.06	1.28	Tb05.5K5.180,Tb05.5K5.190,Tb09.v4.0009,Tb11.v5.0209,Tb11.v5.0217,Tb11.v5.0281,Tb11.v5.0379,Tb11.v5.0380,Tb11.v5.0424,Tb11.v5.0425,Tb11.v5.0429,Tb11.v5.0431,Tb11.v5.0456,Tb11.v5.0470,Tb11.v5.0484,Tb11.v5.0546,Tb11.v5.0576,Tb11.v5.0654,Tb11.v5.0784,Tb11.v5.0821,Tb11.v5.0830,Tb11.v5.0864,Tb11.v5.0865,Tb11.v5.1015,Tb11.v5.1016,Tb927.10.13040,Tb927.10.16000,Tb927.10.16190,Tb927.10.2430,Tb927.11.13740,…
Tb427_000839400.1-p1-CDS1	Tb427_000839400.1	unitig_520_Tb427v10	Tb11.v5.1020	retrotransposon hot spot (RHS) protein	RHS	hypothetical protein, conserved	20	0.0826	NA	0	1.08	26.67	160	47	38	61	6	8	11	1.37	1.36	1.72	0.68	1.03	1.57	Tb11.v5.1020,Tb927.1.240,Tb927.1.500,Tb927.10.16200,Tb927.11.18610,Tb927.11.18630
Tb427_000682700.1-p1-CDS1	Tb427_000682700.1	unitig_1912_Tb427v10	Tb09.v4.0013	retrotransposon hot spot (RHS) protein	RHS	Retrotransposon hot spot protein	28	-0.1367	NA	0	1.07	64.11	577	116	81	49	9	10	9	3.37	2.91	1.38	1.02	1.29	1.28	Tb09.v4.0013,Tb09.v4.0067,Tb11.0820,Tb11.1780,Tb11.v5.0214,Tb11.v5.0294,Tb11.v5.0295,Tb11.v5.0325,Tb11.v5.0326,Tb11.v5.0353,Tb11.v5.0489,Tb11.v5.0532,Tb11.v5.0533,Tb11.v5.0594,Tb11.v5.0624,Tb11.v5.0670,Tb11.v5.0693,Tb11.v5.0839,Tb927.1.120,Tb927.1.180,Tb927.1.190,Tb927.1.220,Tb927.1.70,Tb927.1.90,Tb927.10.110,Tb927.10.70,Tb927.2.100,Tb927.2.1120,Tb927.2.1180,Tb927.2.1210,Tb927.2.270,Tb927.2.280,T…
Tb427_000678700.1-p1-CDS1	Tb427_000678700.1	unitig_190_Tb427v10	Tb10.v4.0215	hypothetical protein	ZUnknown	hypothetical protein, conserved	19	0.0447	NA	0	0.96	16.83	101	47	33	61	6	8	9	1.37	1.18	1.72	0.68	1.03	1.28	Tb10.v4.0215,Tb927.9.15820
Tb427_030025800.1-p1-CDS1	Tb427_030025800.1	Chr3_core_Tb427v10	Tb927.3.2550	hypothetical protein, conserved	ZUnknown	hypothetical protein, conserved	26	0.3255	NA	0	1.76	15.86	111	66	36	57	7	14	17	1.92	1.29	1.61	0.79	1.8	2.42	Tb927.3.2550,Tb927.3.2560,Tb927.3.2570
Tb427_000638100.1-p1-CDS1	Tb427_000638100.1	unitig_166_Tb427v10	Tb927.1.280	Protein of unknown function (DUF1181)	ZUnknown	Protein of unknown function (DUF1181)	20	0.0384	NA	0	1.01	19.71	138	52	40	57	7	11	7	1.51	1.44	1.61	0.79	1.42	1	Tb927.1.280,Tb927.1.380,Tb927.1.470,Tb927.2.160,Tb927.2.680,Tb927.2.940,Tb927.4.150,Tb927.6.120,Tb927.7.7550
Tb427_000644600.1-p1-CDS7	Tb427_000644600.1	unitig_1835_Tb427v10	Tb05.5K5.180	GRESAG 4 receptor-type adenylate cyclase	GRESAG	Adenylate and Guanylate cyclase catalytic domain containing protein	21	-0.014	NA	0	1	20.6	103	58	52	65	5	11	7	1.69	1.87	1.84	0.57	1.42	1	Tb05.5K5.180,Tb05.5K5.190,Tb09.v4.0009,Tb11.v5.0209,Tb11.v5.0217,Tb11.v5.0281,Tb11.v5.0379,Tb11.v5.0380,Tb11.v5.0424,Tb11.v5.0425,Tb11.v5.0429,Tb11.v5.0431,Tb11.v5.0456,Tb11.v5.0470,Tb11.v5.0484,Tb11.v5.0546,Tb11.v5.0576,Tb11.v5.0654,Tb11.v5.0784,Tb11.v5.0821,Tb11.v5.0830,Tb11.v5.0864,Tb11.v5.0865,Tb11.v5.1015,Tb11.v5.1016,Tb927.10.13040,Tb927.10.16000,Tb927.10.16190,Tb927.10.2430,Tb927.11.13740,…
Tb427_000329300.1-p1-CDS1	Tb427_000329300.1	Chr4_3A_Tb427v10	Tb11.v5.1020	retrotransposon hot spot (RHS) protein	RHS	Endonuclease-reverse transcriptase	17	-0.0594	NA	0	0.73	29.25	234	46	33	53	8	6	7	1.34	1.18	1.5	0.91	0.77	1	Tb11.v5.1020,Tb927.1.240,Tb927.1.500,Tb927.10.16200,Tb927.11.18610,Tb927.11.18630
Tb427_000657400.1-p1-CDS1	Tb427_000657400.1	unitig_1857_Tb427v10	Tb927.11.17840	retrotransposon hot spot protein (RHS, pseudogene)	RHS	Retrotransposon hot spot protein	18	-0.1897	NA	0	0.62	29.13	233	55	49	53	8	5	6	1.6	1.76	1.5	0.91	0.64	0.85	Tb927.11.17840,Tb927.2.720,Tb927.2.980,Tb927.4.190,Tb927.5.160
Tb427_000797600.1-p1-CDS6	Tb427_000797600.1	unitig_2610_Tb427v10	Tb05.5K5.180	GRESAG 4 receptor-type adenylate cyclase	GRESAG	Adenylate and Guanylate cyclase catalytic domain containing protein	21	0.0185	NA	0	0.99	24.67	222	62	39	50	9	12	6	1.8	1.4	1.41	1.02	1.55	0.85	Tb05.5K5.180,Tb05.5K5.190,Tb09.v4.0009,Tb11.v5.0209,Tb11.v5.0217,Tb11.v5.0281,Tb11.v5.0379,Tb11.v5.0380,Tb11.v5.0424,Tb11.v5.0425,Tb11.v5.0429,Tb11.v5.0431,Tb11.v5.0456,Tb11.v5.0470,Tb11.v5.0484,Tb11.v5.0546,Tb11.v5.0576,Tb11.v5.0654,Tb11.v5.0784,Tb11.v5.0821,Tb11.v5.0830,Tb11.v5.0864,Tb11.v5.0865,Tb11.v5.1015,Tb11.v5.1016,Tb927.10.13040,Tb927.10.16000,Tb927.10.16190,Tb927.10.2430,Tb927.11.13740,…	1.02148	1
Tb427_000040600.1-p1-CDS1	Tb427_000040600.1	Chr10_3A_Tb427v10	Tb11.v5.1020	retrotransposon hot spot (RHS) protein	RHS	RNase H	19	-0.0047	NA	0	0.89	50.29	352	53	35	58	7	9	7	1.54	1.26	1.64	0.79	1.16	1	Tb11.v5.1020,Tb927.1.240,Tb927.1.500,Tb927.10.16200,Tb927.11.18610,Tb927.11.18630	1.19535	1
Tb427_000664700.1-p1-CDS8	Tb427_000664700.1	unitig_1879_Tb427v10	Tb11.v5.1020	retrotransposon hot spot (RHS) protein	RHS	hypothetical protein, conserved	21	0.1849	NA	0	1.23	44	396	47	35	50	9	10	12	1.37	1.26	1.41	1.02	1.29	1.71	Tb11.v5.1020,Tb927.1.240,Tb927.1.500,Tb927.10.16200,Tb927.11.18610,Tb927.11.18630	1.33342	1
Tb427_000732900.1-p1-CDS2	Tb427_000732900.1	unitig_219_Tb427v10	Tb927.1.490	hypothetical protein	ZUnknown	hypothetical protein, conserved	22	0.0744	NA	0	1.18	86	258	57	44	74	3	10	11	1.66	1.58	2.09	0.34	1.29	1.57	Tb927.1.490,Tb927.4.180,Tb927.9.740	1.36177	1
Tb427_000642900.1-p1-CDS1	Tb427_000642900.1	unitig_173_Tb427v10	Tb10.v4.0215	hypothetical protein	ZUnknown	hypothetical protein, conserved	23	-0.2602	NA	0	0.67	14.71	103	104	65	58	7	6	6	3.02	2.33	1.64	0.79	0.77	0.85	Tb10.v4.0215,Tb927.9.15820	1.48543	1
Tb427_000019800.1-p1-CDS1	Tb427_000019800.1	BES3_Tb427v10	Tb05.5K5.350	ESAG3 pseudogene	ESAG.pseudo	hypothetical protein, conserved	22	-0.0232	NA	0	1	428.5	1714	71	45	70	4	11	7	2.06	1.62	1.98	0.45	1.42	1	Tb05.5K5.350,Tb05.5K5.420,Tb05.5K5.500,Tb08.27P2.160,Tb08.27P2.250,Tb08.27P2.330,Tb08.27P2.400,Tb08.27P2.520,Tb09.v4.0024,Tb09.v4.0027,Tb09.v4.0033,Tb09.v4.0045,Tb09.v4.0062,Tb09.v4.0083,Tb09.v4.0100,Tb09.v4.0115,Tb09.v4.0130,Tb09.v4.0132,Tb09.v4.0154,Tb09.v4.0160,Tb09.v4.0172,Tb09.v4.0181,Tb09.v4.0201,Tb09.v4.0206,Tb10.v4.0057,Tb10.v4.0066,Tb10.v4.0074,Tb10.v4.0090,Tb10.v4.0101,Tb10.v4.0137,Tb10…	1.53107	1
Tb427_000832300.1-p1-CDS5	Tb427_000832300.1	unitig_376_Tb427v10	Tb05.5K5.180	GRESAG 4 receptor-type adenylate cyclase	GRESAG	Adenylate and Guanylate cyclase catalytic domain containing protein	20	-0.0232	NA	0	0.89	29.25	234	62	35	54	8	8	8	1.8	1.26	1.52	0.91	1.03	1.14	Tb05.5K5.180,Tb05.5K5.190,Tb09.v4.0009,Tb11.v5.0209,Tb11.v5.0217,Tb11.v5.0281,Tb11.v5.0379,Tb11.v5.0380,Tb11.v5.0424,Tb11.v5.0425,Tb11.v5.0429,Tb11.v5.0431,Tb11.v5.0456,Tb11.v5.0470,Tb11.v5.0484,Tb11.v5.0546,Tb11.v5.0576,Tb11.v5.0654,Tb11.v5.0784,Tb11.v5.0821,Tb11.v5.0830,Tb11.v5.0864,Tb11.v5.0865,Tb11.v5.1015,Tb11.v5.1016,Tb927.10.13040,Tb927.10.16000,Tb927.10.16190,Tb927.10.2430,Tb927.11.13740,…	1.65076	1
Tb427_000808600.1-p1-CDS1	Tb427_000808600.1	unitig_284_Tb427v10	Tb927.2.300	DNA-directed RNA polymerase, pseudogene	Pseudogene	RNA polymerase Rpb2, domain 4/RNA polymerase Rpb2, domain 6	18	-0.0338	NA	0	0.77	59.38	475	41	37	54	8	8	6	1.19	1.33	1.52	0.91	1.03	0.85	Tb927.2.300,Tb927.2.420,Tb927.2.460,Tb927.2.540,Tb927.4.230,Tb927.6.5190	1.76553	1
Tb427_000682300.1-p1-CDS1	Tb427_000682300.1	unitig_1912_Tb427v10	Tb09.v4.0013	retrotransposon hot spot (RHS) protein	RHS	Retrotransposon hot spot protein	23	0.1722	NA	0	1.29	27.63	221	51	42	54	8	11	12	1.48	1.51	1.52	0.91	1.42	1.71	Tb09.v4.0013,Tb09.v4.0067,Tb11.0820,Tb11.1780,Tb11.v5.0214,Tb11.v5.0294,Tb11.v5.0295,Tb11.v5.0325,Tb11.v5.0326,Tb11.v5.0353,Tb11.v5.0489,Tb11.v5.0532,Tb11.v5.0533,Tb11.v5.0594,Tb11.v5.0624,Tb11.v5.0670,Tb11.v5.0693,Tb11.v5.0839,Tb927.1.120,Tb927.1.180,Tb927.1.190,Tb927.1.220,Tb927.1.70,Tb927.1.90,Tb927.10.110,Tb927.10.70,Tb927.2.100,Tb927.2.1120,Tb927.2.1180,Tb927.2.1210,Tb927.2.270,Tb927.2.280,T…	1.02857	1.0072
Tb427_000085600.1-p1-CDS1	Tb427_000085600.1	Chr10_3B_Tb427v10	Tb05.5K5.340	VSG pseudogene,variant surface glycoprotein, degenerate	VSG	Trypanosomal VSG domain containing protein	18	0.0565	NA	0	0.95	39.5	237	43	31	62	6	9	8	1.25	1.11	1.75	0.68	1.16	1.14	Tb05.5K5.340,Tb08.27P2.140,Tb08.27P2.150,Tb08.27P2.310,Tb08.27P2.565,Tb08.27P2.630,Tb08.27P2.640,Tb09.v4.0031,Tb09.v4.0046,Tb09.v4.0048,Tb09.v4.0069,Tb09.v4.0076,Tb09.v4.0077,Tb09.v4.0081,Tb09.v4.0087,Tb09.v4.0089,Tb09.v4.0116,Tb09.v4.0119,Tb09.v4.0120,Tb09.v4.0123,Tb09.v4.0129,Tb09.v4.0137,Tb09.v4.0139,Tb09.v4.0155,Tb09.v4.0156,Tb09.v4.0159,Tb09.v4.0168,Tb09.v4.0185,Tb09.v4.0190,Tb09.v4.0200,Tb0…	1.30451	1.0072
Tb427_000698000.1-p1-CDS2	Tb427_000698000.1	unitig_1988_Tb427v10	Tb09.v4.0041	leucine-rich repeat protein LRRP, pseudogene	LRRP	hypothetical protein, conserved	21	0.036	NA	0	0.99	26.4	264	56	40	46	10	11	7	1.63	1.44	1.3	1.14	1.42	1	Tb09.v4.0041,Tb11.v5.0448,Tb11.v5.0551,Tb11.v5.0560,Tb11.v5.0602,Tb11.v5.0703,Tb11.v5.0838,Tb927.1.290,Tb927.1.370,Tb927.1.480,Tb927.11.1500,Tb927.11.1510,Tb927.2.1310,Tb927.2.170,Tb927.2.690,Tb927.2.950,Tb927.3.1490,Tb927.4.160,Tb927.6.130,Tb927.7.7540,Tb927.9.14540	1.32193	1.0072
Tb427_000812200.1-p1-CDS1	Tb427_000812200.1	unitig_2969_Tb427v10	Tb11.v5.1020	retrotransposon hot spot (RHS) protein	RHS	Reverse transcriptase (RNA-dependent DNA polymerase)	18	-0.1148	NA	0	0.66	12.7	127	39	49	46	10	7	5	1.13	1.76	1.3	1.14	0.9	0.71	Tb11.v5.1020,Tb927.1.240,Tb927.1.500,Tb927.10.16200,Tb927.11.18610,Tb927.11.18630	1.36177	1.0072
Tb427_000071300.1-p1-CDS1	Tb427_000071300.1	Chr10_3A_Tb427v10	Tb11.v5.1020	retrotransposon hot spot (RHS) protein	RHS	hypothetical protein, conserved	21	0.0063	NA	0	0.95	26	260	57	41	46	10	7	10	1.66	1.47	1.3	1.14	0.9	1.42	Tb11.v5.1020,Tb927.1.240,Tb927.1.500,Tb927.10.16200,Tb927.11.18610,Tb927.11.18630	1.37851	1.0072
Tb427_000740100.1-p1-CDS1	Tb427_000740100.1	unitig_2219_Tb427v10	Tb09.v4.0152	hypothetical protein	ZUnknown	hypothetical protein, conserved	22	0.2629	NA	0	1.34	25.3	253	41	33	46	10	11	13	1.19	1.18	1.3	1.14	1.42	1.85	Tb09.v4.0152,Tb927.11.17830,Tb927.9.760	1.45943	1.0072
Tb427_000725900.1-p1-CDS1	Tb427_000725900.1	unitig_2174_Tb427v10	Tb10.v4.0215	hypothetical protein	ZUnknown	hypothetical protein, conserved	20	-0.2347	NA	0	0.53	16.6	166	74	51	46	10	9	1	2.15	1.83	1.3	1.14	1.16	0.14	Tb10.v4.0215,Tb927.9.15820	1.59932	1.0072
Tb427_000698300.1-p1-CDS1	Tb427_000698300.1	unitig_1997_Tb427v10	Tb927.1.490	hypothetical protein	ZUnknown	hypothetical protein, conserved	20	-0.0941	NA	0	0.78	17.6	176	54	48	46	10	7	7	1.57	1.72	1.3	1.14	0.9	1	Tb927.1.490,Tb927.4.180,Tb927.9.740	1.60881	1.0072
Tb427_000708000.1-p1-CDS3	Tb427_000708000.1	unitig_2087_Tb427v10	Tb927.2.300	DNA-directed RNA polymerase, pseudogene	Pseudogene	RNA polymerase Rpb2, domain 4/RNA polymerase Rpb2, domain 6	22	-0.0638	NA	0	0.94	62.67	376	80	45	63	6	7	10	2.33	1.62	1.78	0.68	0.9	1.42	Tb927.2.300,Tb927.2.420,Tb927.2.460,Tb927.2.540,Tb927.4.230,Tb927.6.5190	1.9782	1.0072
Tb427_000767200.1-p1-CDS3	Tb427_000767200.1	unitig_2452_Tb427v10	Tb09.v4.0013	retrotransposon hot spot (RHS) protein	RHS	Retrotransposon hot spot protein	21	0.0828	NA	0	1.12	31.8	159	46	45	67	5	17	4	1.34	1.62	1.89	0.57	2.19	0.57	Tb09.v4.0013,Tb09.v4.0067,Tb11.0820,Tb11.1780,Tb11.v5.0214,Tb11.v5.0294,Tb11.v5.0295,Tb11.v5.0325,Tb11.v5.0326,Tb11.v5.0353,Tb11.v5.0489,Tb11.v5.0532,Tb11.v5.0533,Tb11.v5.0594,Tb11.v5.0624,Tb11.v5.0670,Tb11.v5.0693,Tb11.v5.0839,Tb927.1.120,Tb927.1.180,Tb927.1.190,Tb927.1.220,Tb927.1.70,Tb927.1.90,Tb927.10.110,Tb927.10.70,Tb927.2.100,Tb927.2.1120,Tb927.2.1180,Tb927.2.1210,Tb927.2.270,Tb927.2.280,T…	1.02857	1.02148
Tb427_000828300.1-p1-CDS1	Tb427_000828300.1	unitig_3147_Tb427v10	Tb927.1.410	retrotransposon hot spot protein (RHS, pseudogene)	RHS	Retrotransposon hot spot protein	21	0.0852	NA	0	1.09	53	318	39	48	63	6	12	8	1.13	1.72	1.78	0.68	1.55	1.14	Tb927.1.410,Tb927.6.150	1.08406	1.02148
Tb427_000747100.1-p1-CDS5	Tb427_000747100.1	unitig_223_Tb427v10	Tb11.v5.1020	retrotransposon hot spot (RHS) protein	RHS	hypothetical protein, conserved	14	-0.0025	NA	0	0.62	8.22	74	16	21	51	9	4	7	0.47	0.75	1.44	1.02	0.52	1	Tb11.v5.1020,Tb927.1.240,Tb927.1.500,Tb927.10.16200,Tb927.11.18610,Tb927.11.18630	1.10434	1.02148
Tb427_000115600.1-p1-CDS1	Tb427_000115600.1	Chr11_3A_Tb427v10	Tb11.v5.1020	retrotransposon hot spot (RHS) protein	RHS	RNase H	23	-0.0623	NA	0	0.94	35	385	74	51	43	11	8	9	2.15	1.83	1.21	1.25	1.03	1.28	Tb11.v5.1020,Tb927.1.240,Tb927.1.500,Tb927.10.16200,Tb927.11.18610,Tb927.11.18630	1.12433	1.02148
Tb427_000074100.1-p1-CDS1	Tb427_000074100.1	Chr10_3A_Tb427v10	Tb11.v5.1020	retrotransposon hot spot (RHS) protein	RHS	Reverse transcriptase (RNA-dependent DNA polymerase)	22	0.027	NA	0	1.04	22	242	64	45	43	11	11	8	1.86	1.62	1.21	1.25	1.42	1.14	Tb11.v5.1020,Tb927.1.240,Tb927.1.500,Tb927.10.16200,Tb927.11.18610,Tb927.11.18630	1.25096	1.02148
Tb427_000544200.1-p1-CDS1	Tb427_000544200.1	Chr8_5B_Tb427v10	Tb927.11.17380	VSG pseudogene, frameshifted and interrupted	VSG	Trypanosomal VSG domain/Trypanosome variant surface glycoprotein C-terminal domain containing protein	19	-0.0468	NA	0	0.8	2.2	11	60	35	67	5	12	3	1.75	1.26	1.89	0.57	1.55	0.43	Tb927.11.17380,Tb927.11.19720,Tb927.8.130,Tb927.9.16220	1.34483	1.02148
Tb427_000269200.1-p1-CDS4	Tb427_000269200.1	Chr1_5A_Tb427v10	Tb10.v4.0215	hypothetical protein	ZUnknown	hypothetical protein, conserved	22	-0.0791	NA	0	0.93	50.6	253	74	54	67	5	10	7	2.15	1.94	1.89	0.57	1.29	1	Tb10.v4.0215,Tb927.9.15820	1.42761	1.02148
Tb427_000704200.1-p1-CDS2	Tb427_000704200.1	unitig_2078_Tb427v10	Tb10.v4.0215	hypothetical protein	ZUnknown	hypothetical protein, conserved	24	-0.1217	NA	0	0.92	14.29	100	94	59	59	7	12	5	2.73	2.12	1.67	0.79	1.55	0.71	Tb10.v4.0215,Tb927.9.15820	1.44361	1.02148
Tb427_000252300.1-p1-CDS1	Tb427_000252300.1	Chr1_3B_Tb427v10	Tb11.v5.0655	trypanosome RHS family	ZUnknown	hypothetical protein	21	0.0208	NA	0	1	28.22	254	56	44	51	9	8	10	1.63	1.58	1.44	1.02	1.03	1.42	Tb11.v5.0655,Tb927.1.430,Tb927.1.450,Tb927.2.1140,Tb927.2.830,Tb927.4.110	1.58496	1.02148
Tb427_000288900.1-p1-CDS1	Tb427_000288900.1	Chr3_5A_Tb427v10	Tb11.v5.1020	retrotransposon hot spot (RHS) protein	RHS	Endonuclease-reverse transcriptase/Reverse transcriptase (RNA-dependent DNA polymerase)	19	-0.0148	NA	0	0.81	26.2	262	46	37	47	10	9	6	1.34	1.33	1.33	1.14	1.16	0.85	Tb11.v5.1020,Tb927.1.240,Tb927.1.500,Tb927.10.16200,Tb927.11.18610,Tb927.11.18630	1.60881	1.02148
Tb427_000679800.1-p1-CDS1	Tb427_000679800.1	unitig_190_Tb427v10	Tb10.v4.0215	hypothetical protein	ZUnknown	hypothetical protein, conserved	21	-0.1319	NA	0	0.76	14	140	61	55	47	10	9	5	1.77	1.97	1.33	1.14	1.16	0.71	Tb10.v4.0215,Tb927.9.15820	1.65076	1.02148
Tb427_000712500.1-p1-CDS1	Tb427_000712500.1	unitig_2120_Tb427v10	Tb10.v4.0215	hypothetical protein	ZUnknown	hypothetical protein, conserved	20	-0.0205	NA	0	0.85	13.7	137	59	36	47	10	13	3	1.72	1.29	1.33	1.14	1.68	0.43	Tb10.v4.0215,Tb927.9.15820	1.67807	1.02148
Tb427_000810000.1-p1-CDS3	Tb427_000810000.1	unitig_284_Tb427v10	Tb09.v4.0041	leucine-rich repeat protein LRRP, pseudogene	LRRP	hypothetical protein, conserved	19	-0.2662	NA	0	0.54	13.71	96	74	51	60	7	6	4	2.15	1.83	1.69	0.79	0.77	0.57	Tb09.v4.0041,Tb11.v5.0448,Tb11.v5.0551,Tb11.v5.0560,Tb11.v5.0602,Tb11.v5.0703,Tb11.v5.0838,Tb927.1.290,Tb927.1.370,Tb927.1.480,Tb927.11.1500,Tb927.11.1510,Tb927.2.1310,Tb927.2.170,Tb927.2.690,Tb927.2.950,Tb927.3.1490,Tb927.4.160,Tb927.6.130,Tb927.7.7540,Tb927.9.14540	1.68706	1.02148
Tb427_000274700.1-p1-CDS2	Tb427_000274700.1	Chr1_5A_Tb427v10	Tb927.1.280	Protein of unknown function (DUF1181)	ZUnknown	Protein of unknown function (DUF1181)	19	-0.0858	NA	0	0.75	5.71	40	55	40	60	7	9	5	1.6	1.44	1.69	0.79	1.16	0.71	Tb927.1.280,Tb927.1.380,Tb927.1.470,Tb927.2.160,Tb927.2.680,Tb927.2.940,Tb927.4.150,Tb927.6.120,Tb927.7.7550	1.76129	1.02148
Tb427_000666900.1-p1-CDS3	Tb427_000666900.1	unitig_1881_Tb427v10	Tb11.v5.1020	retrotransposon hot spot (RHS) protein	RHS	Reverse transcriptase (RNA-dependent DNA polymerase)	14	-0.1695	NA	0	0.39	14.2	71	40	22	68	5	3	4	1.16	0.79	1.92	0.57	0.39	0.57	Tb11.v5.1020,Tb927.1.240,Tb927.1.500,Tb927.10.16200,Tb927.11.18610,Tb927.11.18630	1.96347	1.02148
Tb427_000637400.1-p1-CDS2	Tb427_000637400.1	unitig_166_Tb427v10	Tb10.v4.0215	hypothetical protein	ZUnknown	hypothetical protein, conserved	25	-0.0266	NA	0	1.1	22.2	111	92	50	68	5	8	12	2.68	1.8	1.92	0.57	1.03	1.71	Tb10.v4.0215,Tb927.9.15820	1	1.02857
Tb427_000733300.1-p1-CDS4	Tb427_000733300.1	unitig_219_Tb427v10	Tb05.5K5.180	GRESAG 4 receptor-type adenylate cyclase	GRESAG	Adenylate and Guanylate cyclase catalytic domain containing protein	22	-0.0729	NA	0	0.93	47.33	284	58	65	64	6	8	9	1.69	2.33	1.81	0.68	1.03	1.28	Tb05.5K5.180,Tb05.5K5.190,Tb09.v4.0009,Tb11.v5.0209,Tb11.v5.0217,Tb11.v5.0281,Tb11.v5.0379,Tb11.v5.0380,Tb11.v5.0424,Tb11.v5.0425,Tb11.v5.0429,Tb11.v5.0431,Tb11.v5.0456,Tb11.v5.0470,Tb11.v5.0484,Tb11.v5.0546,Tb11.v5.0576,Tb11.v5.0654,Tb11.v5.0784,Tb11.v5.0821,Tb11.v5.0830,Tb11.v5.0864,Tb11.v5.0865,Tb11.v5.1015,Tb11.v5.1016,Tb927.10.13040,Tb927.10.16000,Tb927.10.16190,Tb927.10.2430,Tb927.11.13740,…	1.10434	1.02857
Tb427_000707200.1-p1-CDS4	Tb427_000707200.1	unitig_2085_Tb427v10	Tb927.2.300	DNA-directed RNA polymerase, pseudogene	Pseudogene	RNA polymerase Rpb2, domain 4/RNA polymerase Rpb2, domain 6	18	-0.0779	NA	0	0.7	33.13	265	47	35	56	8	8	5	1.37	1.26	1.58	0.91	1.03	0.71	Tb927.2.300,Tb927.2.420,Tb927.2.460,Tb927.2.540,Tb927.4.230,Tb927.6.5190	1.14405	1.02857
Tb427_000747800.1-p1-CDS17	Tb427_000747800.1	unitig_2246_Tb427v10	Tb927.2.300	DNA-directed RNA polymerase, pseudogene	Pseudogene	RNA polymerase Rpb2, domain 6	21	-0.0326	NA	0	0.93	2.78	25	69	41	52	9	8	9	2.01	1.47	1.47	1.02	1.03	1.28	Tb927.2.300,Tb927.2.420,Tb927.2.460,Tb927.2.540,Tb927.4.230,Tb927.6.5190	1.19535	1.02857
Tb427_000682100.1-p1-CDS1	Tb427_000682100.1	unitig_1911_Tb427v10	Tb09.v4.0013	retrotransposon hot spot (RHS) protein	RHS	Retrotransposon hot spot protein	34	-0.0011	NA	0	1.57	35.44	319	116	104	52	9	16	13	3.37	3.73	1.47	1.02	2.06	1.85	Tb09.v4.0013,Tb09.v4.0067,Tb11.0820,Tb11.1780,Tb11.v5.0214,Tb11.v5.0294,Tb11.v5.0295,Tb11.v5.0325,Tb11.v5.0326,Tb11.v5.0353,Tb11.v5.0489,Tb11.v5.0532,Tb11.v5.0533,Tb11.v5.0594,Tb11.v5.0624,Tb11.v5.0670,Tb11.v5.0693,Tb11.v5.0839,Tb927.1.120,Tb927.1.180,Tb927.1.190,Tb927.1.220,Tb927.1.70,Tb927.1.90,Tb927.10.110,Tb927.10.70,Tb927.2.100,Tb927.2.1120,Tb927.2.1180,Tb927.2.1210,Tb927.2.270,Tb927.2.280,T…	1.19535	1.02857
Tb427_000099800.1-p1-CDS2	Tb427_000099800.1	Chr10_3B_Tb427v10	Tb11.v5.1020	retrotransposon hot spot (RHS) protein	RHS	Endonuclease-reverse transcriptase/Reverse transcriptase (RNA-dependent DNA polymerase)	20	0.0606	NA	0	0.99	38.78	349	46	39	52	9	7	11	1.34	1.4	1.47	1.02	0.9	1.57	Tb11.v5.1020,Tb927.1.240,Tb927.1.500,Tb927.10.16200,Tb927.11.18610,Tb927.11.18630	1.24489	1.02857
Tb427_000506400.1-p1-CDS2	Tb427_000506400.1	Chr8_5A_Tb427v10	Tb927.4.5500	VSG pseudogene,variant surface glycoprotein, degenerate	VSG	Trypanosome variant surface glycoprotein (A-type)	19	-0.0556	NA	0	0.82	1	6	49	45	64	6	7	8	1.43	1.62	1.81	0.68	0.9	1.14	Tb927.4.5500,Tb927.9.280	1.31615	1.02857
Tb427_000269700.1-p1-CDS1	Tb427_000269700.1	Chr1_5A_Tb427v10	Tb09.v4.0066	hypothetical protein	ZUnknown	hypothetical protein, conserved	25	0.1536	NA	0	1.39	79.83	479	53	59	64	6	17	9	1.54	2.12	1.81	0.68	2.19	1.28	Tb09.v4.0066,Tb927.1.110	1.36177	1.02857
Tb427_000809700.1-p1-CDS2	Tb427_000809700.1	unitig_284_Tb427v10	Tb10.v4.0215	hypothetical protein	ZUnknown	hypothetical protein, conserved	24	-0.1265	NA	0	0.85	28	168	108	47	64	6	12	4	3.14	1.69	1.81	0.68	1.55	0.57	Tb10.v4.0215,Tb927.9.15820	1.39506	1.02857
Tb427_000694900.1-p1-CDS3	Tb427_000694900.1	unitig_1973_Tb427v10	Tb10.v4.0215	hypothetical protein	ZUnknown	hypothetical protein, conserved	22	-0.0696	NA	0	0.92	24.33	219	66	56	52	9	9	8	1.92	2.01	1.47	1.02	1.16	1.14	Tb10.v4.0215,Tb927.9.15820	1.43829	1.02857
Tb427_000695700.1-p1-CDS4	Tb427_000695700.1	unitig_1976_Tb427v10	Tb10.v4.0215	hypothetical protein	ZUnknown	hypothetical protein, conserved	23	-0.0206	NA	0	1.03	17.67	159	70	54	52	9	10	9	2.04	1.94	1.47	1.02	1.29	1.28	Tb10.v4.0215,Tb927.9.15820	1.55582	1.02857
Tb427_000362600.1-p1-CDS1	Tb427_000362600.1	Chr5_3A_Tb427v10	Tb11.v5.1020	retrotransposon hot spot (RHS) protein	RHS	Endonuclease-reverse transcriptase	18	0.0119	NA	0	0.8	27.6	276	50	24	48	10	9	6	1.45	0.86	1.36	1.14	1.16	0.85	Tb11.v5.1020,Tb927.1.240,Tb927.1.500,Tb927.10.16200,Tb927.11.18610,Tb927.11.18630	1.65076	1.02857
Tb427_000192900.1-p1-CDS1	Tb427_000192900.1	Chr1_3A_Tb427v10	Tb11.v5.1020	retrotransposon hot spot (RHS) protein	RHS	RNase H	17	-0.2066	NA	0	0.49	36	252	56	34	61	7	3	6	1.63	1.22	1.72	0.79	0.39	0.85	Tb11.v5.1020,Tb927.1.240,Tb927.1.500,Tb927.10.16200,Tb927.11.18610,Tb927.11.18630	1.66448	1.02857
Tb427_000773600.1-p1-CDS1	Tb427_000773600.1	unitig_2466_Tb427v10	Tb927.1.490	hypothetical protein	ZUnknown	hypothetical protein, conserved	24	-0.0798	NA	0	0.97	32.86	230	88	52	61	7	9	9	2.56	1.87	1.72	0.79	1.16	1.28	Tb927.1.490,Tb927.4.180,Tb927.9.740	1.72683	1.02857
Tb427_000834100.1-p1-CDS2	Tb427_000834100.1	unitig_407_Tb427v10	Tb05.5K5.180	GRESAG 4 receptor-type adenylate cyclase	GRESAG	Adenylate and Guanylate cyclase catalytic domain containing protein	25	0.0956	NA	0	1.25	38.8	388	67	52	49	10	10	13	1.95	1.87	1.38	1.14	1.29	1.85	Tb05.5K5.180,Tb05.5K5.190,Tb09.v4.0009,Tb11.v5.0209,Tb11.v5.0217,Tb11.v5.0281,Tb11.v5.0379,Tb11.v5.0380,Tb11.v5.0424,Tb11.v5.0425,Tb11.v5.0429,Tb11.v5.0431,Tb11.v5.0456,Tb11.v5.0470,Tb11.v5.0484,Tb11.v5.0546,Tb11.v5.0576,Tb11.v5.0654,Tb11.v5.0784,Tb11.v5.0821,Tb11.v5.0830,Tb11.v5.0864,Tb11.v5.0865,Tb11.v5.1015,Tb11.v5.1016,Tb927.10.13040,Tb927.10.16000,Tb927.10.16190,Tb927.10.2430,Tb927.11.13740,…	1.77821	1.02857
Tb427_000409500.1-p1-CDS1	Tb427_000409500.1	Chr6_3A_Tb427v10	Tb11.v5.1020	retrotransposon hot spot (RHS) protein	RHS	Endonuclease-reverse transcriptase	20	0.095	NA	0	0.98	21.2	212	40	33	49	10	7	11	1.16	1.18	1.38	1.14	0.9	1.57	Tb11.v5.1020,Tb927.1.240,Tb927.1.500,Tb927.10.16200,Tb927.11.18610,Tb927.11.18630	1.8679	1.02857
Tb427_000790300.1-p1-CDS11	Tb427_000790300.1	unitig_2534_Tb427v10	Tb927.11.18620	variant surface glycoprotein (VSG)	VSG	hypothetical protein, conserved	18	-0.0548	NA	0	0.7	21.2	212	49	28	49	10	6	7	1.43	1.01	1.38	1.14	0.77	1	Tb927.11.18620,Tb927.11.19850	1.8679	1.02857
Tb427_000807800.1-p1-CDS4	Tb427_000807800.1	unitig_2801_Tb427v10	Tb10.v4.0215	hypothetical protein	ZUnknown	hypothetical protein, conserved	22	-0.0314	NA	0	0.92	14.4	144	70	40	49	10	8	9	2.04	1.44	1.38	1.14	1.03	1.28	Tb10.v4.0215,Tb927.9.15820	1.87971	1.02857
Tb427_000673600.1-p1-CDS2	Tb427_000673600.1	unitig_1899_Tb427v10	Tb927.1.400	hypothetical protein, conserved	ZUnknown	hypothetical protein, conserved	21	-0.0194	NA	0	0.9	17.3	173	62	41	49	10	12	5	1.8	1.47	1.38	1.14	1.55	0.71	Tb927.1.400	1.49057	1.03562
Tb427_000655500.1-p1-CDS1	Tb427_000655500.1	unitig_1853_Tb427v10	Tb927.1.275	ESAG4 pseudogene	ESAG.pseudo	hypothetical protein, conserved	21	0.0064	NA	0	0.98	15	120	54	48	57	8	7	11	1.57	1.72	1.61	0.91	0.9	1.57	Tb927.1.275,Tb927.2.1260,Tb927.4.130,Tb927.6.100	1.55582	1.03562
Tb427_000832300.1-p1-CDS1	Tb427_000832300.1	unitig_376_Tb427v10	Tb05.5K5.180	GRESAG 4 receptor-type adenylate cyclase	GRESAG	Adenylate and Guanylate cyclase catalytic domain containing protein	27	0.2101	NA	0	1.51	40.78	367	68	52	53	9	13	15	1.98	1.87	1.5	1.02	1.68	2.13	Tb05.5K5.180,Tb05.5K5.190,Tb09.v4.0009,Tb11.v5.0209,Tb11.v5.0217,Tb11.v5.0281,Tb11.v5.0379,Tb11.v5.0380,Tb11.v5.0424,Tb11.v5.0425,Tb11.v5.0429,Tb11.v5.0431,Tb11.v5.0456,Tb11.v5.0470,Tb11.v5.0484,Tb11.v5.0546,Tb11.v5.0576,Tb11.v5.0654,Tb11.v5.0784,Tb11.v5.0821,Tb11.v5.0830,Tb11.v5.0864,Tb11.v5.0865,Tb11.v5.1015,Tb11.v5.1016,Tb927.10.13040,Tb927.10.16000,Tb927.10.16190,Tb927.10.2430,Tb927.11.13740,…	1.36737	1.04264
Tb427_000719800.1-p1-CDS1	Tb427_000719800.1	unitig_2140_Tb427v10	Tb11.v5.1020	retrotransposon hot spot (RHS) protein	RHS	Reverse transcriptase (RNA-dependent DNA polymerase)	19	-0.049	NA	0	0.79	34	306	53	39	53	9	10	5	1.54	1.4	1.5	1.02	1.29	0.71	Tb11.v5.1020,Tb927.1.240,Tb927.1.500,Tb927.10.16200,Tb927.11.18610,Tb927.11.18630	1.44361	1.04264
Tb427_000799400.1-p1-CDS4	Tb427_000799400.1	unitig_2611_Tb427v10	Tb927.9.780	hypothetical protein	ZUnknown	hypothetical protein, conserved	26	-0.2568	NA	0	0.69	18.4	92	113	82	69	5	8	5	3.29	2.94	1.95	0.57	1.03	0.71	Tb927.9.780	2.31615	1.04264
Tb427_000547500.1-p1-CDS1	Tb427_000547500.1	Chr8_5B_Tb427v10	Tb09.v4.0153	hypothetical protein	ZUnknown	hypothetical protein	22	0.055	NA	0	1.08	26.88	215	61	43	57	8	10	10	1.77	1.54	1.61	0.91	1.29	1.42	Tb09.v4.0153	2.41143	1.04264
Tb427_000700300.1-p1-CDS1	Tb427_000700300.1	unitig_2014_Tb427v10	Tb927.1.490	hypothetical protein	ZUnknown	hypothetical protein, conserved	20	-0.1675	NA	0	0.69	36.38	291	57	58	57	8	7	6	1.66	2.08	1.61	0.91	0.9	0.85	Tb927.1.490,Tb927.4.180,Tb927.9.740	1.0635	1.0635
Tb427_000739900.1-p1-CDS3	Tb427_000739900.1	unitig_2219_Tb427v10	Tb10.v4.0215	hypothetical protein	ZUnknown	hypothetical protein, conserved	16	-0.1085	NA	0	0.58	58.67	528	35	37	53	9	8	3	1.02	1.33	1.5	1.02	1.03	0.43	Tb10.v4.0215,Tb927.9.15820	1.19535	1.0635
Tb427_000799900.1-p1-CDS3	Tb427_000799900.1	unitig_2611_Tb427v10	Tb927.1.275	ESAG4 pseudogene	ESAG.pseudo	hypothetical protein, conserved	18	-0.0925	NA	0	0.7	22.67	204	44	42	54	9	6	7	1.28	1.51	1.52	1.02	0.77	1	Tb927.1.275,Tb927.2.1260,Tb927.4.130,Tb927.6.100	1.41143	1.0635
Tb427_000698400.1-p1-CDS1	Tb427_000698400.1	unitig_1997_Tb427v10	Tb927.11.17840	retrotransposon hot spot protein (RHS, pseudogene)	RHS	Retrotransposon hot spot protein	19	-0.0443	NA	0	0.8	20.14	141	48	40	62	7	8	7	1.4	1.44	1.75	0.79	1.03	1	Tb927.11.17840,Tb927.2.720,Tb927.2.980,Tb927.4.190,Tb927.5.160	2.17951	1.0635
Tb427_050010700.1-p1-CDS3	Tb427_050010700.1	Chr5_core_Tb427v10	Tb927.1.4920	hypothetical protein	ZUnknown	hypothetical protein	17	-0.2816	NA	0	0.41	1	7	54	49	62	7	6	2	1.57	1.76	1.75	0.79	0.77	0.28	Tb927.1.4920	1.30451	1.07724
Tb427_070082600.1-p1-CDS1	Tb427_070082600.1	Chr7_core_Tb427v10	Tb927.7.7495	hypothetical protein	ZUnknown	hypothetical protein, conserved	21	0.0589	NA	0	1.02	1	9	56	38	54	9	8	11	1.63	1.36	1.52	1.02	1.03	1.57	Tb927.7.7495	2.05658	1.07724
Tb427_000765600.1-p1-CDS2	Tb427_000765600.1	unitig_2451_Tb427v10	Tb927.1.400	hypothetical protein, conserved	ZUnknown	hypothetical protein, conserved	23	0.0633	NA	0	1.13	20	180	64	47	54	9	9	12	1.86	1.69	1.52	1.02	1.16	1.71	Tb927.1.400	2.11437	1.07724
Tb427_000259000.1-p1-CDS1	Tb427_000259000.1	Chr1_3B_Tb427v10	#N/A	#N/A	#N/A	#N/A	23	-0.0277	NA	0	1.02	53.33	320	76	49	66	6	9	10	2.21	1.76	1.86	0.68	1.16	1.42	#N/A	1.12433	1.08406
Tb427_010026500.1-p1-CDS4	Tb427_010026500.1	Chr1_core_Tb427v10	Tb11.v5.1020	retrotransposon hot spot (RHS) protein	RHS	Reverse transcriptase (RNA-dependent DNA polymerase)	42	-0.2067	NA	0	1.16	12.38	99	181	175	58	8	13	9	5.26	6.28	1.64	0.91	1.68	1.28	Tb11.v5.1020,Tb927.1.240,Tb927.1.500,Tb927.10.16200,Tb927.11.18610,Tb927.11.18630	1.31615	1.08406
Tb427_000771900.1-p1-CDS4	Tb427_000771900.1	unitig_2456_Tb427v10	Tb11.v5.1020	retrotransposon hot spot (RHS) protein	RHS	Reverse transcriptase (RNA-dependent DNA polymerase)	23	0.0633	NA	0	1.11	17	136	65	44	58	8	12	9	1.89	1.58	1.64	0.91	1.55	1.28	Tb11.v5.1020,Tb927.1.240,Tb927.1.500,Tb927.10.16200,Tb927.11.18610,Tb927.11.18630	1.39506	1.08406
Tb427_000456700.1-p1-CDS1	Tb427_000456700.1	Chr7_5A_Tb427v10	Tb11.v5.1020	retrotransposon hot spot (RHS) protein	RHS	Reverse transcriptase (RNA-dependent DNA polymerase)/RNase H	25	0.1922	NA	0	1.4	36.88	295	66	41	58	8	10	16	1.92	1.47	1.64	0.91	1.29	2.28	Tb11.v5.1020,Tb927.1.240,Tb927.1.500,Tb927.10.16200,Tb927.11.18610,Tb927.11.18630	1.54102	1.08406
Tb427_000670700.1-p1-CDS1	Tb427_000670700.1	unitig_1891_Tb427v10	Tb09.v4.0013	retrotransposon hot spot (RHS) protein	RHS	Retrotransposon hot spot protein	15	-0.0926	NA	0	0.52	14.1	141	29	28	50	10	7	3	0.84	1.01	1.41	1.14	0.9	0.43	Tb09.v4.0013,Tb09.v4.0067,Tb11.0820,Tb11.1780,Tb11.v5.0214,Tb11.v5.0294,Tb11.v5.0295,Tb11.v5.0325,Tb11.v5.0326,Tb11.v5.0353,Tb11.v5.0489,Tb11.v5.0532,Tb11.v5.0533,Tb11.v5.0594,Tb11.v5.0624,Tb11.v5.0670,Tb11.v5.0693,Tb11.v5.0839,Tb927.1.120,Tb927.1.180,Tb927.1.190,Tb927.1.220,Tb927.1.70,Tb927.1.90,Tb927.10.110,Tb927.10.70,Tb927.2.100,Tb927.2.1120,Tb927.2.1180,Tb927.2.1210,Tb927.2.270,Tb927.2.280,T…	1.66448	1.08406
Tb427_000650400.1-p1-CDS1	Tb427_000650400.1	unitig_1843_Tb427v10	Tb927.2.1130	retrotransposon hot spot protein (RHS3, pseudogene)	RHS	Retrotransposon hot spot protein	17	-0.0514	NA	0	0.68	23.6	236	42	31	50	10	8	5	1.22	1.11	1.41	1.14	1.03	0.71	Tb927.2.1130	1.99639	1.08406
Tb427_100013200.1-p1-CDS1	Tb427_100013200.1	Chr10_core_Tb427v10	Tb927.10.1010	hypothetical protein	ZUnknown	hypothetical protein, conserved	20	-0.1804	NA	0	0.64	1	5	59	56	70	5	5	7	1.72	2.01	1.98	0.57	0.64	1	Tb927.10.1010	2.17951	1.08406
Tb427_110049500.1-p1-CDS1	Tb427_110049500.1	Chr11_core_Tb427v10	Tb927.11.4440	hypothetical protein	ZUnknown	hypothetical protein, conserved	23	0.1884	NA	0	1.23	1	10	41	43	50	10	10	13	1.19	1.54	1.41	1.14	1.29	1.85	Tb927.11.4440	1.5008	1.09085
Tb427_000701200.1-p1-CDS4	Tb427_000701200.1	unitig_2015_Tb427v10	Tb09.v4.0013	retrotransposon hot spot (RHS) protein	RHS	Retrotransposon hot spot protein	20	-0.2073	NA	0	0.58	23	115	85	40	71	5	6	5	2.47	1.44	2	0.57	0.77	0.71	Tb09.v4.0013,Tb09.v4.0067,Tb11.0820,Tb11.1780,Tb11.v5.0214,Tb11.v5.0294,Tb11.v5.0295,Tb11.v5.0325,Tb11.v5.0326,Tb11.v5.0353,Tb11.v5.0489,Tb11.v5.0532,Tb11.v5.0533,Tb11.v5.0594,Tb11.v5.0624,Tb11.v5.0670,Tb11.v5.0693,Tb11.v5.0839,Tb927.1.120,Tb927.1.180,Tb927.1.190,Tb927.1.220,Tb927.1.70,Tb927.1.90,Tb927.10.110,Tb927.10.70,Tb927.2.100,Tb927.2.1120,Tb927.2.1180,Tb927.2.1210,Tb927.2.270,Tb927.2.280,T…	1.66448	1.09085
Tb427_000703000.1-p1-CDS1	Tb427_000703000.1	unitig_2077_Tb427v10	Tb927.11.17840	retrotransposon hot spot protein (RHS, pseudogene)	RHS	Retrotransposon hot spot protein	19	-0.0604	NA	0	0.78	15	75	56	39	71	5	10	5	1.63	1.4	2	0.57	1.29	0.71	Tb927.11.17840,Tb927.2.720,Tb927.2.980,Tb927.4.190,Tb927.5.160	1.83592	1.09085
Tb427_000730400.1-p1-CDS3	Tb427_000730400.1	unitig_2196_Tb427v10	Tb927.1.3750	hypothetical protein, conserved	ZUnknown	hypothetical protein	9	-0.1073	NA	0	0.16	#DIV/0!	41	14	13	91	0	1	2	0.41	0.47	2.57	0	0.13	0.28	Tb927.1.3750,Tb927.2.1470,Tb927.3.3430,Tb927.7.6870,Tb927.9.17690	1.9855	1.09085
Tb427_000811100.1-p1-CDS2	Tb427_000811100.1	unitig_288_Tb427v10	Tb927.1.3750	hypothetical protein, conserved	ZUnknown	hypothetical protein, conserved	11	-0.2025	NA	0	0.1	16	16	26	27	87	1	2	0	0.76	0.97	2.46	0.11	0.26	0	Tb927.1.3750,Tb927.2.1470,Tb927.3.3430,Tb927.7.6870,Tb927.9.17690	1.10434	1.09761
Tb427_000695700.1-p1-CDS1	Tb427_000695700.1	unitig_1976_Tb427v10	Tb10.v4.0215	hypothetical protein	ZUnknown	hypothetical protein, conserved	22	-0.1013	NA	0	0.85	27.5	165	61	63	67	6	6	10	1.77	2.26	1.89	0.68	0.77	1.42	Tb10.v4.0215,Tb927.9.15820	1.10434	1.09761
Tb427_000271600.1-p1-CDS8	Tb427_000271600.1	Chr1_5A_Tb427v10	Tb05.5K5.350	ESAG3 pseudogene	ESAG.pseudo	hypothetical protein, conserved	14	-0.1185	NA	0	0.44	1.44	13	32	21	55	9	1	7	0.93	0.75	1.55	1.02	0.13	1	Tb05.5K5.350,Tb05.5K5.420,Tb05.5K5.500,Tb08.27P2.160,Tb08.27P2.250,Tb08.27P2.330,Tb08.27P2.400,Tb08.27P2.520,Tb09.v4.0024,Tb09.v4.0027,Tb09.v4.0033,Tb09.v4.0045,Tb09.v4.0062,Tb09.v4.0083,Tb09.v4.0100,Tb09.v4.0115,Tb09.v4.0130,Tb09.v4.0132,Tb09.v4.0154,Tb09.v4.0160,Tb09.v4.0172,Tb09.v4.0181,Tb09.v4.0201,Tb09.v4.0206,Tb10.v4.0057,Tb10.v4.0066,Tb10.v4.0074,Tb10.v4.0090,Tb10.v4.0101,Tb10.v4.0137,Tb10…	1.49057	1.09761
Tb427_000544700.1-p1-CDS8	Tb427_000544700.1	Chr8_5B_Tb427v10	Tb05.5K5.180	GRESAG 4 receptor-type adenylate cyclase	GRESAG	Adenylate and Guanylate cyclase catalytic domain containing protein	17	-0.2307	NA	0	0.42	11.17	134	47	37	43	12	4	4	1.37	1.33	1.21	1.36	0.52	0.57	Tb05.5K5.180,Tb05.5K5.190,Tb09.v4.0009,Tb11.v5.0209,Tb11.v5.0217,Tb11.v5.0281,Tb11.v5.0379,Tb11.v5.0380,Tb11.v5.0424,Tb11.v5.0425,Tb11.v5.0429,Tb11.v5.0431,Tb11.v5.0456,Tb11.v5.0470,Tb11.v5.0484,Tb11.v5.0546,Tb11.v5.0576,Tb11.v5.0654,Tb11.v5.0784,Tb11.v5.0821,Tb11.v5.0830,Tb11.v5.0864,Tb11.v5.0865,Tb11.v5.1015,Tb11.v5.1016,Tb927.10.13040,Tb927.10.16000,Tb927.10.16190,Tb927.10.2430,Tb927.11.13740,…	1.58496	1.09761
Tb427_000505100.1-p1-CDS3	Tb427_000505100.1	Chr8_5A_Tb427v10	Tb11.v5.1020	retrotransposon hot spot (RHS) protein	RHS	Reverse transcriptase (RNA-dependent DNA polymerase)	20	-0.0297	NA	0	0.79	16.92	203	51	37	43	12	7	8	1.48	1.33	1.21	1.36	0.9	1.14	Tb11.v5.1020,Tb927.1.240,Tb927.1.500,Tb927.10.16200,Tb927.11.18610,Tb927.11.18630	1.68706	1.09761
Tb427_000260800.1-p1-CDS1	Tb427_000260800.1	Chr1_3B_Tb427v10	Tb11.v5.1020	retrotransposon hot spot (RHS) protein	RHS	Reverse transcriptase (RNA-dependent DNA polymerase)	18	0.029	NA	0	0.78	22.5	270	44	22	43	12	9	6	1.28	0.79	1.21	1.36	1.16	0.85	Tb11.v5.1020,Tb927.1.240,Tb927.1.500,Tb927.10.16200,Tb927.11.18610,Tb927.11.18630	1.79077	1.09761
Tb427_000693400.1-p1-CDS3	Tb427_000693400.1	unitig_1969_Tb427v10	Tb927.9.780	hypothetical protein	ZUnknown	hypothetical protein, conserved	29	-0.0034	NA	0	1.3	31.29	219	101	74	63	7	16	9	2.94	2.66	1.78	0.79	2.06	1.28	Tb927.9.780	1.81147	1.09761
Tb427_000679900.1-p1-CDS1	Tb427_000679900.1	unitig_190_Tb427v10	Tb927.9.780	hypothetical protein	ZUnknown	hypothetical protein, conserved	18	-0.1917	NA	0	0.57	33.11	298	59	41	55	9	7	4	1.72	1.47	1.55	1.02	0.9	0.57	Tb927.9.780	2.15056	1.09761
Tb427_000006000.1-p1-CDS2	Tb427_000006000.1	BES11_Tb427v10	Tb927.7.3250	ESAG6, transferrin receptor	ESAG	Trypanosome variant surface glycoprotein (A-type)	12	-0.0068	NA	0	0.49	5.1	51	12	5	51	10	1	8	0.35	0.18	1.44	1.14	0.13	1.14	Tb927.7.3250,Tb927.7.3260	1.19535	1.11103
Tb427_000741600.1-p1-CDS4	Tb427_000741600.1	unitig_2222_Tb427v10	Tb927.2.300	DNA-directed RNA polymerase, pseudogene	Pseudogene	RNA polymerase Rpb2, domain 4/RNA polymerase Rpb2, domain 6	19	-0.0868	NA	0	0.74	35.13	281	58	38	59	8	5	9	1.69	1.36	1.67	0.91	0.64	1.28	Tb927.2.300,Tb927.2.420,Tb927.2.460,Tb927.2.540,Tb927.4.230,Tb927.6.5190	1.28096	1.11103
Tb427_000695500.1-p1-CDS3	Tb427_000695500.1	unitig_1976_Tb427v10	Tb10.v4.0215	hypothetical protein	ZUnknown	hypothetical protein, conserved	21	-0.0874	NA	0	0.8	24.88	199	57	49	59	8	5	10	1.66	1.76	1.67	0.91	0.64	1.42	Tb10.v4.0215,Tb927.9.15820	1.37851	1.11103
Tb427_000759000.1-p1-CDS1	Tb427_000759000.1	unitig_2334_Tb427v10	Tb10.v4.0215	hypothetical protein	ZUnknown	hypothetical protein, conserved	20	-0.2216	NA	0	0.57	21.2	212	65	48	51	10	7	4	1.89	1.72	1.44	1.14	0.9	0.57	Tb10.v4.0215,Tb927.9.15820	1.58496	1.11103
Tb427_000791200.1-p1-CDS3	Tb427_000791200.1	unitig_2565_Tb427v10	Tb10.v4.0215	hypothetical protein	ZUnknown	hypothetical protein, conserved	20	-0.1103	NA	0	0.73	7.6	76	58	45	51	10	8	6	1.69	1.62	1.44	1.14	1.03	0.85	Tb10.v4.0215,Tb927.9.15820	1.65535	1.11103
Tb427_000691000.1-p1-CDS2	Tb427_000691000.1	unitig_1960_Tb427v10	Tb10.v4.0215	hypothetical protein	ZUnknown	hypothetical protein, conserved	21	-0.0381	NA	0	0.85	23.82	262	64	38	47	11	6	10	1.86	1.36	1.33	1.25	0.77	1.42	Tb10.v4.0215,Tb927.9.15820	1.7137	1.11103
Tb427_000676100.1-p1-CDS3	Tb427_000676100.1	unitig_1902_Tb427v10	Tb09.v4.0041	leucine-rich repeat protein LRRP, pseudogene	LRRP	Leucine Rich repeat	22	-0.1669	NA	0	0.72	78.5	471	66	61	68	6	9	5	1.92	2.19	1.92	0.68	1.16	0.71	Tb09.v4.0041,Tb11.v5.0448,Tb11.v5.0551,Tb11.v5.0560,Tb11.v5.0602,Tb11.v5.0703,Tb11.v5.0838,Tb927.1.290,Tb927.1.370,Tb927.1.480,Tb927.11.1500,Tb927.11.1510,Tb927.2.1310,Tb927.2.170,Tb927.2.690,Tb927.2.950,Tb927.3.1490,Tb927.4.160,Tb927.6.130,Tb927.7.7540,Tb927.9.14540	1.73118	1.11103
Tb427_020033100.1-p1-CDS3	Tb427_020033100.1	Chr2_core_Tb427v10	Tb11.v5.1020	retrotransposon hot spot (RHS) protein	RHS	hypothetical protein, conserved	19	-0.0157	NA	0	0.84	3	6	58	34	84	2	7	9	1.69	1.22	2.37	0.23	0.9	1.28	Tb11.v5.1020,Tb927.1.240,Tb927.1.500,Tb927.10.16200,Tb927.11.18610,Tb927.11.18630	1.96347	1.11103
Tb427_000648200.1-p1-CDS1	Tb427_000648200.1	unitig_1841_Tb427v10	Tb927.11.17840	retrotransposon hot spot protein (RHS, pseudogene)	RHS	Retrotransposon hot spot protein	25	0.2362	NA	0	1.48	28.5	171	52	46	68	6	11	17	1.51	1.65	1.92	0.68	1.42	2.42	Tb927.11.17840,Tb927.2.720,Tb927.2.980,Tb927.4.190,Tb927.5.160	1.17632	1.1177
Tb427_000082100.1-p1-CDS1	Tb427_000082100.1	Chr10_3B_Tb427v10	Tb11.v5.1020	retrotransposon hot spot (RHS) protein	RHS	Reverse transcriptase (RNA-dependent DNA polymerase)	20	-0.0128	NA	0	0.83	35.38	283	50	36	60	8	9	7	1.45	1.29	1.69	0.91	1.16	1	Tb11.v5.1020,Tb927.1.240,Tb927.1.500,Tb927.10.16200,Tb927.11.18610,Tb927.11.18630	1.19535	1.1177
Tb427_000694400.1-p1-CDS10	Tb427_000694400.1	unitig_1970_Tb427v10	Tb09.v4.0013	retrotransposon hot spot (RHS) protein	RHS	Retrotransposon hot spot protein	18	-0.1847	NA	0	0.56	57	513	56	41	56	9	8	3	1.63	1.47	1.58	1.02	1.03	0.43	Tb09.v4.0013,Tb09.v4.0067,Tb11.0820,Tb11.1780,Tb11.v5.0214,Tb11.v5.0294,Tb11.v5.0295,Tb11.v5.0325,Tb11.v5.0326,Tb11.v5.0353,Tb11.v5.0489,Tb11.v5.0532,Tb11.v5.0533,Tb11.v5.0594,Tb11.v5.0624,Tb11.v5.0670,Tb11.v5.0693,Tb11.v5.0839,Tb927.1.120,Tb927.1.180,Tb927.1.190,Tb927.1.220,Tb927.1.70,Tb927.1.90,Tb927.10.110,Tb927.10.70,Tb927.2.100,Tb927.2.1120,Tb927.2.1180,Tb927.2.1210,Tb927.2.270,Tb927.2.280,T…	1.28096	1.1177
Tb427_000794200.1-p1-CDS1	Tb427_000794200.1	unitig_2569_Tb427v10	Tb09.v4.0013	retrotransposon hot spot (RHS) protein	RHS	Retrotransposon hot spot protein	22	0.0155	NA	0	0.97	28.56	257	48	55	56	9	13	6	1.4	1.97	1.58	1.02	1.68	0.85	Tb09.v4.0013,Tb09.v4.0067,Tb11.0820,Tb11.1780,Tb11.v5.0214,Tb11.v5.0294,Tb11.v5.0295,Tb11.v5.0325,Tb11.v5.0326,Tb11.v5.0353,Tb11.v5.0489,Tb11.v5.0532,Tb11.v5.0533,Tb11.v5.0594,Tb11.v5.0624,Tb11.v5.0670,Tb11.v5.0693,Tb11.v5.0839,Tb927.1.120,Tb927.1.180,Tb927.1.190,Tb927.1.220,Tb927.1.70,Tb927.1.90,Tb927.10.110,Tb927.10.70,Tb927.2.100,Tb927.2.1120,Tb927.2.1180,Tb927.2.1210,Tb927.2.270,Tb927.2.280,T…	1.51096	1.1177
Tb427_000255200.1-p1-CDS1	Tb427_000255200.1	Chr1_3B_Tb427v10	Tb11.v5.1020	retrotransposon hot spot (RHS) protein	RHS	RNase H	24	0.1068	NA	0	1.21	41.44	373	67	45	56	9	9	14	1.95	1.62	1.58	1.02	1.16	1.99	Tb11.v5.1020,Tb927.1.240,Tb927.1.500,Tb927.10.16200,Tb927.11.18610,Tb927.11.18630	1.54102	1.1177
Tb427_000452300.1-p1-CDS1	Tb427_000452300.1	Chr6_3B_Tb427v10	Tb11.v5.1020	retrotransposon hot spot (RHS) protein	RHS	hypothetical protein, conserved	20	0.0761	NA	0	0.93	10.42	125	48	30	44	12	11	7	1.4	1.08	1.24	1.36	1.42	1	Tb11.v5.1020,Tb927.1.240,Tb927.1.500,Tb927.10.16200,Tb927.11.18610,Tb927.11.18630	1.67807	1.1177
Tb427_000830800.1-p1-CDS6	Tb427_000830800.1	unitig_317_Tb427v10	Tb10.v4.0215	hypothetical protein	ZUnknown	hypothetical protein, conserved	24	-0.0378	NA	0	0.98	23.86	167	61	63	64	7	11	8	1.77	2.26	1.81	0.79	1.42	1.14	Tb10.v4.0215,Tb927.9.15820	1.75275	1.1177
Tb427_000708100.1-p1-CDS2	Tb427_000708100.1	unitig_2087_Tb427v10	Tb09.v4.0066	hypothetical protein	ZUnknown	hypothetical protein, conserved	20	-0.058	NA	0	0.77	55.63	445	46	45	60	8	9	6	1.34	1.62	1.69	0.91	1.16	0.85	Tb09.v4.0066,Tb927.1.110	1.75275	1.1177
Tb427_000310800.1-p1-CDS1	Tb427_000310800.1	Chr4_3A_Tb427v10	Tb09.v4.0152	hypothetical protein	ZUnknown	hypothetical protein, conserved	22	0.0924	NA	0	1.07	11.11	100	61	32	56	9	16	5	1.77	1.15	1.58	1.02	2.06	0.71	Tb09.v4.0152,Tb927.11.17830,Tb927.9.760	1.79909	1.1177
Tb427_000810500.1-p1-CDS2	Tb427_000810500.1	unitig_284_Tb427v10	Tb10.v4.0215	hypothetical protein	ZUnknown	hypothetical protein, conserved	27	0.0744	NA	0	1.3	54	486	90	52	56	9	13	12	2.62	1.87	1.58	1.02	1.68	1.71	Tb10.v4.0215,Tb927.9.15820	1.83188	1.1177
Tb427_000683100.1-p1-CDS1	Tb427_000683100.1	unitig_1912_Tb427v10	Tb11.v5.1020	retrotransposon hot spot (RHS) protein	RHS	hypothetical protein	22	0.052	NA	0	0.98	63.64	700	54	41	48	11	12	7	1.57	1.47	1.36	1.25	1.55	1	Tb11.v5.1020,Tb927.1.240,Tb927.1.500,Tb927.10.16200,Tb927.11.18610,Tb927.11.18630	1.91073	1.1177
Tb427_000276600.1-p1-CDS1	Tb427_000276600.1	Chr1_5B_Tb427v10	Tb927.1.280	Protein of unknown function (DUF1181)	ZUnknown	Protein of unknown function (DUF1181)	19	-0.1296	NA	0	0.67	14.9	149	54	44	52	10	8	5	1.57	1.58	1.47	1.14	1.03	0.71	Tb927.1.280,Tb927.1.380,Tb927.1.470,Tb927.2.160,Tb927.2.680,Tb927.2.940,Tb927.4.150,Tb927.6.120,Tb927.7.7550	1.91839	1.1177
Tb427_000722800.1-p1-CDS1	Tb427_000722800.1	unitig_2168_Tb427v10	Tb927.1.275	ESAG4 pseudogene	ESAG.pseudo	hypothetical protein, conserved	24	0.043	NA	0	1.09	36.5	292	65	49	61	8	10	11	1.89	1.76	1.72	0.91	1.29	1.57	Tb927.1.275,Tb927.2.1260,Tb927.4.130,Tb927.6.100	1.93357	1.1177
Tb427_000286300.1-p1-CDS1	Tb427_000286300.1	Chr3_3A_Tb427v10	Tb927.2.300	DNA-directed RNA polymerase, pseudogene	Pseudogene	RNA polymerase Rpb2, domain 4	28	-0.0464	NA	0	1.14	33.44	301	94	72	57	9	9	13	2.73	2.59	1.61	1.02	1.16	1.85	Tb927.2.300,Tb927.2.420,Tb927.2.460,Tb927.2.540,Tb927.4.230,Tb927.6.5190	1.95233	1.1177
Tb427_000500200.1-p1-CDS4	Tb427_000500200.1	Chr8_3B_Tb427v10	Tb927.2.300	DNA-directed RNA polymerase, pseudogene	Pseudogene	RNA polymerase Rpb2, domain 4	20	-0.2046	NA	0	0.56	1.25	15	68	42	45	12	7	4	1.98	1.51	1.27	1.36	0.9	0.57	Tb927.2.300,Tb927.2.420,Tb927.2.460,Tb927.2.540,Tb927.4.230,Tb927.6.5190	1.17632	1.12433
Tb427_000609400.1-p1-CDS1	Tb427_000609400.1	Chr9_3B_Tb427v10	Tb11.v5.1020	retrotransposon hot spot (RHS) protein	RHS	Endonuclease-reverse transcriptase/Reverse transcriptase (RNA-dependent DNA polymerase)/RNase H	25	-0.0288	NA	0	1.05	90.17	541	86	53	69	6	6	14	2.5	1.9	1.95	0.68	0.77	1.99	Tb11.v5.1020,Tb927.1.240,Tb927.1.500,Tb927.10.16200,Tb927.11.18610,Tb927.11.18630	1.37851	1.12433
Tb427_000425900.1-p1-CDS1	Tb427_000425900.1	Chr6_3B_Tb427v10	Tb11.v5.1020	retrotransposon hot spot (RHS) protein	RHS	Reverse transcriptase (RNA-dependent DNA polymerase)	26	0.212	NA	0	1.43	35.29	247	61	49	65	7	17	11	1.77	1.76	1.84	0.79	2.19	1.57	Tb11.v5.1020,Tb927.1.240,Tb927.1.500,Tb927.10.16200,Tb927.11.18610,Tb927.11.18630	1.58496	1.12433
Tb427_000668700.1-p1-CDS9	Tb427_000668700.1	unitig_1884_Tb427v10	Tb11.v5.1020	retrotransposon hot spot (RHS) protein	RHS	hypothetical protein, conserved	21	0.0573	NA	0	0.99	11.89	107	61	31	57	9	8	11	1.77	1.11	1.61	1.02	1.03	1.57	Tb11.v5.1020,Tb927.1.240,Tb927.1.500,Tb927.10.16200,Tb927.11.18610,Tb927.11.18630	1.62761	1.12433
Tb427_000626500.1-p1-CDS1	Tb427_000626500.1	Chr9_5A_Tb427v10	Tb11.v5.1020	retrotransposon hot spot (RHS) protein	RHS	hypothetical protein, conserved	24	0.2213	NA	0	1.32	1	9	58	31	57	9	18	8	1.69	1.11	1.61	1.02	2.32	1.14	Tb11.v5.1020,Tb927.1.240,Tb927.1.500,Tb927.10.16200,Tb927.11.18610,Tb927.11.18630	1.63691	1.12433
Tb427_090037900.1-p1-CDS1	Tb427_090037900.1	Chr9_core_Tb427v10	Tb11.v5.1020	retrotransposon hot spot (RHS) protein	RHS	Reverse transcriptase (RNA-dependent DNA polymerase)	29	0.3162	NA	0	1.69	37	333	72	47	57	9	18	15	2.09	1.69	1.61	1.02	2.32	2.13	Tb11.v5.1020,Tb927.1.240,Tb927.1.500,Tb927.10.16200,Tb927.11.18610,Tb927.11.18630	1.65076	1.12433
Tb427_000301900.1-p1-CDS2	Tb427_000301900.1	Chr3_5A_Tb427v10	Tb11.v5.1020	retrotransposon hot spot (RHS) protein	RHS	Reverse transcriptase (RNA-dependent DNA polymerase)	21	0.038	NA	0	0.93	12.73	140	48	42	49	11	9	9	1.4	1.51	1.38	1.25	1.16	1.28	Tb11.v5.1020,Tb927.1.240,Tb927.1.500,Tb927.10.16200,Tb927.11.18610,Tb927.11.18630	1.93357	1.12433
Tb427_000441100.1-p1-CDS3	Tb427_000441100.1	Chr6_3B_Tb427v10	Tb11.v5.1020	retrotransposon hot spot (RHS) protein	RHS	Reverse transcriptase (RNA-dependent DNA polymerase)	22	0.1112	NA	0	1.06	18	216	48	41	45	12	15	6	1.4	1.47	1.27	1.36	1.93	0.85	Tb11.v5.1020,Tb927.1.240,Tb927.1.500,Tb927.10.16200,Tb927.11.18610,Tb927.11.18630	1.94486	1.12433
Tb427_030026100.1-p1-CDS1	Tb427_030026100.1	Chr3_core_Tb427v10	Tb927.3.2550	hypothetical protein, conserved	ZUnknown	hypothetical protein, conserved	19	-0.0129	NA	0	0.81	55.5	111	57	31	85	2	12	4	1.66	1.11	2.4	0.23	1.55	0.57	Tb927.3.2550,Tb927.3.2560,Tb927.3.2570	2.04614	1.12433
Tb427_000781200.1-p1-CDS3	Tb427_000781200.1	unitig_2490_Tb427v10	Tb927.1.490	hypothetical protein	ZUnknown	hypothetical protein, conserved	23	-0.1005	NA	0	0.86	8.4	42	86	52	73	5	12	5	2.5	1.87	2.06	0.57	1.55	0.71	Tb927.1.490,Tb927.4.180,Tb927.9.740	2.17951	1.12433
Tb427_000669200.1-p1-CDS2	Tb427_000669200.1	unitig_1884_Tb427v10	Tb927.2.2090	hypothetical protein	ZUnknown	hypothetical protein, conserved	29	0.09	NA	0	1.46	13.2	66	100	58	73	5	11	17	2.91	2.08	2.06	0.57	1.42	2.42	Tb927.2.2090	2.38957	1.12433
Tb427_000484700.1-p1-CDS1	Tb427_000484700.1	Chr8_3A_Tb427v10	Tb10.v4.0215	hypothetical protein	ZUnknown	hypothetical protein, conserved	23	-0.1659	NA	0	0.78	19.33	116	87	56	69	6	7	8	2.53	2.01	1.95	0.68	0.9	1.14	Tb10.v4.0215,Tb927.9.15820	1.23266	1.13093
Tb427_000659600.1-p1-CDS2	Tb427_000659600.1	unitig_1859_Tb427v10	Tb10.v4.0215	hypothetical protein	ZUnknown	hypothetical protein, conserved	21	-0.4224	NA	0	0.32	31.57	221	94	63	65	7	2	4	2.73	2.26	1.84	0.79	0.26	0.57	Tb10.v4.0215,Tb927.9.15820	1.25096	1.13093
Tb427_000744000.1-p1-CDS5	Tb427_000744000.1	unitig_2228_Tb427v10	Tb10.v4.0215	hypothetical protein	ZUnknown	hypothetical protein, conserved	22	-0.0306	NA	0	0.92	37.25	298	67	45	61	8	11	7	1.95	1.62	1.72	0.91	1.42	1	Tb10.v4.0215,Tb927.9.15820	1.36177	1.13093
Tb427_080026300.1-p1-CDS4	Tb427_080026300.1	Chr8_core_Tb427v10	Tb927.8.2320	hypothetical protein	ZUnknown	hypothetical protein, conserved	18	-0.0369	NA	0	0.71	1	8	52	24	61	8	10	4	1.51	0.86	1.72	0.91	1.29	0.57	Tb927.8.2320	1.36737	1.13093
Tb427_000694900.1-p1-CDS4	Tb427_000694900.1	unitig_1973_Tb427v10	Tb10.v4.0215	hypothetical protein	ZUnknown	hypothetical protein, conserved	19	-0.2812	NA	0	0.47	17.73	195	60	52	49	11	4	5	1.75	1.87	1.38	1.25	0.52	0.71	Tb10.v4.0215,Tb927.9.15820	1.43829	1.13093
Tb427_000827100.1-p1-CDS1	Tb427_000827100.1	unitig_313_Tb427v10	Tb10.v4.0215	hypothetical protein	ZUnknown	hypothetical protein, conserved	20	-0.2961	NA	0	0.47	8.6	86	89	43	53	10	4	5	2.59	1.54	1.5	1.14	0.52	0.71	Tb10.v4.0215,Tb927.9.15820	1.5656	1.13093
Tb427_010024100.1-p1-CDS1	Tb427_010024100.1	Chr1_core_Tb427v10	Tb927.1.3350	hypothetical protein	ZUnknown	hypothetical protein, conserved	21	0.117	NA	0	1.04	1	10	45	35	53	10	7	13	1.31	1.26	1.5	1.14	0.9	1.85	Tb927.1.3350	1.69153	1.13093
Tb427_000285400.1-p1-CDS1	Tb427_000285400.1	Chr3_3A_Tb427v10	Tb927.1.400	hypothetical protein, conserved	ZUnknown	hypothetical protein, conserved	19	-0.0351	NA	0	0.79	21.8	109	45	41	74	5	4	11	1.31	1.47	2.09	0.57	0.52	1.57	Tb927.1.400	1.75275	1.13093
Tb427_000737300.1-p1-CDS4	Tb427_000737300.1	unitig_2217_Tb427v10	Tb05.5K5.180	GRESAG 4 receptor-type adenylate cyclase	GRESAG	hypothetical protein, conserved	19	-0.1248	NA	0	0.62	17.58	211	50	38	46	12	5	7	1.45	1.36	1.3	1.36	0.64	1	Tb05.5K5.180,Tb05.5K5.190,Tb09.v4.0009,Tb11.v5.0209,Tb11.v5.0217,Tb11.v5.0281,Tb11.v5.0379,Tb11.v5.0380,Tb11.v5.0424,Tb11.v5.0425,Tb11.v5.0429,Tb11.v5.0431,Tb11.v5.0456,Tb11.v5.0470,Tb11.v5.0484,Tb11.v5.0546,Tb11.v5.0576,Tb11.v5.0654,Tb11.v5.0784,Tb11.v5.0821,Tb11.v5.0830,Tb11.v5.0864,Tb11.v5.0865,Tb11.v5.1015,Tb11.v5.1016,Tb927.10.13040,Tb927.10.16000,Tb927.10.16190,Tb927.10.2430,Tb927.11.13740,…	1.7866	1.13093
Tb427_000656600.1-p1-CDS3	Tb427_000656600.1	unitig_1853_Tb427v10	Tb927.2.300	DNA-directed RNA polymerase, pseudogene	Pseudogene	RNA polymerase Rpb2, domain 4	22	0.0394	NA	0	1.02	88.67	532	57	45	70	6	10	10	1.66	1.62	1.98	0.68	1.29	1.42	Tb927.2.300,Tb927.2.420,Tb927.2.460,Tb927.2.540,Tb927.4.230,Tb927.6.5190	2.06695	1.13093
Tb427_000728000.1-p1-CDS1	Tb427_000728000.1	unitig_2184_Tb427v10	Tb11.v5.1020	retrotransposon hot spot (RHS) protein	RHS	hypothetical protein, conserved	17	-0.2265	NA	0	0.45	8	88	54	36	50	11	6	3	1.57	1.29	1.41	1.25	0.77	0.43	Tb11.v5.1020,Tb927.1.240,Tb927.1.500,Tb927.10.16200,Tb927.11.18610,Tb927.11.18630	2.74416	1.1375
Tb427_000714900.1-p1-CDS2	Tb427_000714900.1	unitig_2126_Tb427v10	Tb11.v5.1020	retrotransposon hot spot (RHS) protein	RHS	Endonuclease-reverse transcriptase/Reverse transcriptase (RNA-dependent DNA polymerase)	23	0.0028	NA	0	0.96	12.17	146	54	56	46	12	12	7	1.57	2.01	1.3	1.36	1.55	1	Tb11.v5.1020,Tb927.1.240,Tb927.1.500,Tb927.10.16200,Tb927.11.18610,Tb927.11.18630	1.12433	1.14405
Tb427_000795100.1-p1-CDS1	Tb427_000795100.1	unitig_2569_Tb427v10	Tb09.v4.0152	hypothetical protein	ZUnknown	hypothetical protein, conserved	23	-0.0407	NA	0	0.91	16.1	161	70	47	54	10	11	7	2.04	1.69	1.52	1.14	1.42	1	Tb09.v4.0152,Tb927.11.17830,Tb927.9.760	1.25096	1.14405
Tb427_100019800.1-p1-CDS2	Tb427_100019800.1	Chr10_core_Tb427v10	Tb927.10.1670	hypothetical protein	ZUnknown	hypothetical protein, conserved	23	0.1719	NA	0	1.17	1	12	43	44	46	12	13	10	1.25	1.58	1.3	1.36	1.68	1.42	Tb927.10.1670	1.46989	1.14405
Tb427_000696100.1-p1-CDS3	Tb427_000696100.1	unitig_197_Tb427v10	Tb927.1.400	hypothetical protein, conserved	ZUnknown	hypothetical protein, conserved	19	-0.0516	NA	0	0.71	12.08	145	47	35	46	12	8	6	1.37	1.26	1.3	1.36	1.03	0.85	Tb927.1.400	1.49057	1.14405
Tb427_000777700.1-p1-CDS3	Tb427_000777700.1	unitig_2477_Tb427v10	Tb927.1.490	hypothetical protein	ZUnknown	hypothetical protein, conserved	23	-0.0986	NA	0	0.85	20.71	145	76	52	67	7	11	6	2.21	1.87	1.89	0.79	1.42	0.85	Tb927.1.490,Tb927.4.180,Tb927.9.740	1.61353	1.14405
Tb427_000833700.1-p1-CDS8	Tb427_000833700.1	unitig_395_Tb427v10	Tb05.5K5.180	GRESAG 4 receptor-type adenylate cyclase	GRESAG	hypothetical protein, conserved	23	0.0072	NA	0	0.99	170.5	1023	59	53	71	6	14	6	1.72	1.9	2	0.68	1.8	0.85	Tb05.5K5.180,Tb05.5K5.190,Tb09.v4.0009,Tb11.v5.0209,Tb11.v5.0217,Tb11.v5.0281,Tb11.v5.0379,Tb11.v5.0380,Tb11.v5.0424,Tb11.v5.0425,Tb11.v5.0429,Tb11.v5.0431,Tb11.v5.0456,Tb11.v5.0470,Tb11.v5.0484,Tb11.v5.0546,Tb11.v5.0576,Tb11.v5.0654,Tb11.v5.0784,Tb11.v5.0821,Tb11.v5.0830,Tb11.v5.0864,Tb11.v5.0865,Tb11.v5.1015,Tb11.v5.1016,Tb927.10.13040,Tb927.10.16000,Tb927.10.16190,Tb927.10.2430,Tb927.11.13740,…	1.8679	1.14405
Tb427_000708300.1-p1-CDS3	Tb427_000708300.1	unitig_2087_Tb427v10	Tb09.v4.0013	retrotransposon hot spot (RHS) protein	RHS	Retrotransposon hot spot protein	22	-0.083	NA	0	0.85	32.33	194	70	51	71	6	10	7	2.04	1.83	2	0.68	1.29	1	Tb09.v4.0013,Tb09.v4.0067,Tb11.0820,Tb11.1780,Tb11.v5.0214,Tb11.v5.0294,Tb11.v5.0295,Tb11.v5.0325,Tb11.v5.0326,Tb11.v5.0353,Tb11.v5.0489,Tb11.v5.0532,Tb11.v5.0533,Tb11.v5.0594,Tb11.v5.0624,Tb11.v5.0670,Tb11.v5.0693,Tb11.v5.0839,Tb927.1.120,Tb927.1.180,Tb927.1.190,Tb927.1.220,Tb927.1.70,Tb927.1.90,Tb927.10.110,Tb927.10.70,Tb927.2.100,Tb927.2.1120,Tb927.2.1180,Tb927.2.1210,Tb927.2.270,Tb927.2.280,T…	2.24184	1.14405
Tb427_000820500.1-p1-CDS2	Tb427_000820500.1	unitig_3048_Tb427v10	Tb05.5K5.180	GRESAG 4 receptor-type adenylate cyclase	GRESAG	Adenylate and Guanylate cyclase catalytic domain containing protein	23	0.1753	NA	0	1.16	14.09	155	47	40	51	11	12	11	1.37	1.44	1.44	1.25	1.55	1.57	Tb05.5K5.180,Tb05.5K5.190,Tb09.v4.0009,Tb11.v5.0209,Tb11.v5.0217,Tb11.v5.0281,Tb11.v5.0379,Tb11.v5.0380,Tb11.v5.0424,Tb11.v5.0425,Tb11.v5.0429,Tb11.v5.0431,Tb11.v5.0456,Tb11.v5.0470,Tb11.v5.0484,Tb11.v5.0546,Tb11.v5.0576,Tb11.v5.0654,Tb11.v5.0784,Tb11.v5.0821,Tb11.v5.0830,Tb11.v5.0864,Tb11.v5.0865,Tb11.v5.1015,Tb11.v5.1016,Tb927.10.13040,Tb927.10.16000,Tb927.10.16190,Tb927.10.2430,Tb927.11.13740,…	2.41414	1.15704
Tb427_000286300.1-p1-CDS5	Tb427_000286300.1	Chr3_3A_Tb427v10	Tb927.2.300	DNA-directed RNA polymerase, pseudogene	Pseudogene	RNA polymerase Rpb2, domain 4	22	-0.1632	NA	0	0.71	11.88	95	80	47	63	8	5	9	2.33	1.69	1.78	0.91	0.64	1.28	Tb927.2.300,Tb927.2.420,Tb927.2.460,Tb927.2.540,Tb927.4.230,Tb927.6.5190	1.55582	1.1635
Tb427_000747800.1-p1-CDS16	Tb427_000747800.1	unitig_2246_Tb427v10	Tb927.2.300	DNA-directed RNA polymerase, pseudogene	Pseudogene	RNA polymerase Rpb2, domain 6	21	-0.1093	NA	0	0.75	3.44	31	69	42	59	9	8	7	2.01	1.51	1.67	1.02	1.03	1	Tb927.2.300,Tb927.2.420,Tb927.2.460,Tb927.2.540,Tb927.4.230,Tb927.6.5190	1.81147	1.16993
Tb427_000738400.1-p1-CDS1	Tb427_000738400.1	unitig_2218_Tb427v10	Tb927.2.300	DNA-directed RNA polymerase, pseudogene	Pseudogene	RNA polymerase Rpb2, domain 4	24	-0.0158	NA	0	1	20.78	187	71	54	59	9	12	8	2.06	1.94	1.67	1.02	1.55	1.14	Tb927.2.300,Tb927.2.420,Tb927.2.460,Tb927.2.540,Tb927.4.230,Tb927.6.5190	1.29866	1.17632
Tb427_000642100.1-p1-CDS4	Tb427_000642100.1	unitig_172_Tb427v10	Tb927.2.300	DNA-directed RNA polymerase, pseudogene	Pseudogene	RNA polymerase Rpb2, domain 4	15	-0.2322	NA	0	0.34	9.09	100	36	34	51	11	5	2	1.05	1.22	1.44	1.25	0.64	0.28	Tb927.2.300,Tb927.2.420,Tb927.2.460,Tb927.2.540,Tb927.4.230,Tb927.6.5190	1.33342	1.17632
Tb427_000744300.1-p1-CDS1	Tb427_000744300.1	unitig_2229_Tb427v10	Tb09.v4.0013	retrotransposon hot spot (RHS) protein	RHS	hypothetical protein	22	0.0405	NA	0	1.01	64	320	50	49	75	5	9	11	1.45	1.76	2.12	0.57	1.16	1.57	Tb09.v4.0013,Tb09.v4.0067,Tb11.0820,Tb11.1780,Tb11.v5.0214,Tb11.v5.0294,Tb11.v5.0295,Tb11.v5.0325,Tb11.v5.0326,Tb11.v5.0353,Tb11.v5.0489,Tb11.v5.0532,Tb11.v5.0533,Tb11.v5.0594,Tb11.v5.0624,Tb11.v5.0670,Tb11.v5.0693,Tb11.v5.0839,Tb927.1.120,Tb927.1.180,Tb927.1.190,Tb927.1.220,Tb927.1.70,Tb927.1.90,Tb927.10.110,Tb927.10.70,Tb927.2.100,Tb927.2.1120,Tb927.2.1180,Tb927.2.1210,Tb927.2.270,Tb927.2.280,T…	1.39506	1.17632
Tb427_000727600.1-p1-CDS3	Tb427_000727600.1	unitig_2175_Tb427v10	Tb09.v4.0013	retrotransposon hot spot (RHS) protein	RHS	Retrotransposon hot spot protein	25	-0.136	NA	0	0.84	37.78	340	74	72	59	9	12	5	2.15	2.59	1.67	1.02	1.55	0.71	Tb09.v4.0013,Tb09.v4.0067,Tb11.0820,Tb11.1780,Tb11.v5.0214,Tb11.v5.0294,Tb11.v5.0295,Tb11.v5.0325,Tb11.v5.0326,Tb11.v5.0353,Tb11.v5.0489,Tb11.v5.0532,Tb11.v5.0533,Tb11.v5.0594,Tb11.v5.0624,Tb11.v5.0670,Tb11.v5.0693,Tb11.v5.0839,Tb927.1.120,Tb927.1.180,Tb927.1.190,Tb927.1.220,Tb927.1.70,Tb927.1.90,Tb927.10.110,Tb927.10.70,Tb927.2.100,Tb927.2.1120,Tb927.2.1180,Tb927.2.1210,Tb927.2.270,Tb927.2.280,T…	1.42761	1.17632
Tb427_000682200.1-p1-CDS3	Tb427_000682200.1	unitig_1911_Tb427v10	Tb09.v4.0013	retrotransposon hot spot (RHS) protein	RHS	Retrotransposon hot spot protein	30	0.0444	NA	0	1.33	53.64	590	93	70	51	11	8	18	2.7	2.51	1.44	1.25	1.03	2.56	Tb09.v4.0013,Tb09.v4.0067,Tb11.0820,Tb11.1780,Tb11.v5.0214,Tb11.v5.0294,Tb11.v5.0295,Tb11.v5.0325,Tb11.v5.0326,Tb11.v5.0353,Tb11.v5.0489,Tb11.v5.0532,Tb11.v5.0533,Tb11.v5.0594,Tb11.v5.0624,Tb11.v5.0670,Tb11.v5.0693,Tb11.v5.0839,Tb927.1.120,Tb927.1.180,Tb927.1.190,Tb927.1.220,Tb927.1.70,Tb927.1.90,Tb927.10.110,Tb927.10.70,Tb927.2.100,Tb927.2.1120,Tb927.2.1180,Tb927.2.1210,Tb927.2.270,Tb927.2.280,T…	1.42761	1.17632
Tb427_000747100.1-p1-CDS2	Tb427_000747100.1	unitig_223_Tb427v10	Tb11.v5.1020	retrotransposon hot spot (RHS) protein	RHS	hypothetical protein, conserved	26	-0.1146	NA	0	0.91	8.82	97	87	65	51	11	8	10	2.53	2.33	1.44	1.25	1.03	1.42	Tb11.v5.1020,Tb927.1.240,Tb927.1.500,Tb927.10.16200,Tb927.11.18610,Tb927.11.18630	1.85599	1.17632
Tb427_000811700.1-p1-CDS3	Tb427_000811700.1	unitig_2963_Tb427v10	Tb11.v5.1020	retrotransposon hot spot (RHS) protein	RHS	Reverse transcriptase (RNA-dependent DNA polymerase)	19	-0.1047	NA	0	0.65	19.18	211	54	35	51	11	7	6	1.57	1.26	1.44	1.25	0.9	0.85	Tb11.v5.1020,Tb927.1.240,Tb927.1.500,Tb927.10.16200,Tb927.11.18610,Tb927.11.18630	3.28096	1.17632
Tb427_000815900.1-p1-CDS2	Tb427_000815900.1	unitig_3019_Tb427v10	Tb10.v4.0215	hypothetical protein	ZUnknown	hypothetical protein, conserved	25	-0.0794	NA	0	0.96	27.13	217	86	57	63	8	10	9	2.5	2.05	1.78	0.91	1.29	1.28	Tb10.v4.0215,Tb927.9.15820	1.42223	1.18269
Tb427_020005100.1-p1-CDS4	Tb427_020005100.1	Chr2_core_Tb427v10	Tb927.9.17940	hypothetical protein	ZUnknown	hypothetical protein	22	-0.0632	NA	0	0.84	10	80	74	41	63	8	12	5	2.15	1.47	1.78	0.91	1.55	0.71	Tb927.9.17940	1.52607	1.18269
Tb427_000704500.1-p1-CDS2	Tb427_000704500.1	unitig_2080_Tb427v10	Tb10.v4.0215	hypothetical protein	ZUnknown	hypothetical protein, conserved	24	-0.1029	NA	0	0.87	11.89	107	83	52	59	9	6	11	2.41	1.87	1.67	1.02	0.77	1.57	Tb10.v4.0215,Tb927.9.15820	1.53107	1.18269
Tb427_000362500.1-p1-CDS1	Tb427_000362500.1	Chr5_3A_Tb427v10	Tb11.v5.1020	retrotransposon hot spot (RHS) protein	RHS	RNase H	25	0.1487	NA	0	1.22	25.92	311	65	40	47	12	9	15	1.89	1.44	1.33	1.36	1.16	2.13	Tb11.v5.1020,Tb927.1.240,Tb927.1.500,Tb927.10.16200,Tb927.11.18610,Tb927.11.18630	1.62293	1.18269
Tb427_000713100.1-p1-CDS1	Tb427_000713100.1	unitig_2120_Tb427v10	Tb10.v4.0221	hypothetical protein	ZUnknown	hypothetical protein, conserved	18	-0.177	NA	0	0.48	5.5	66	51	37	47	12	9	1	1.48	1.33	1.33	1.36	1.16	0.14	Tb10.v4.0221	1.76553	1.18269
Tb427_000271600.1-p1-CDS5	Tb427_000271600.1	Chr1_5A_Tb427v10	Tb05.5K5.350	ESAG3 pseudogene	ESAG.pseudo	hypothetical protein, conserved	16	-0.0595	NA	0	0.59	1	6	39	23	72	6	7	5	1.13	0.83	2.03	0.68	0.9	0.71	Tb05.5K5.350,Tb05.5K5.420,Tb05.5K5.500,Tb08.27P2.160,Tb08.27P2.250,Tb08.27P2.330,Tb08.27P2.400,Tb08.27P2.520,Tb09.v4.0024,Tb09.v4.0027,Tb09.v4.0033,Tb09.v4.0045,Tb09.v4.0062,Tb09.v4.0083,Tb09.v4.0100,Tb09.v4.0115,Tb09.v4.0130,Tb09.v4.0132,Tb09.v4.0154,Tb09.v4.0160,Tb09.v4.0172,Tb09.v4.0181,Tb09.v4.0201,Tb09.v4.0206,Tb10.v4.0057,Tb10.v4.0066,Tb10.v4.0074,Tb10.v4.0090,Tb10.v4.0101,Tb10.v4.0137,Tb10…	2.8339	1.18269
Tb427_000696500.1-p1-CDS2	Tb427_000696500.1	unitig_197_Tb427v10	Tb927.2.300	DNA-directed RNA polymerase, pseudogene	Pseudogene	RNA polymerase Rpb2, domain 4/RNA polymerase Rpb2, domain 6	23	-0.1622	NA	0	0.75	31	279	80	53	60	9	7	8	2.33	1.9	1.69	1.02	0.9	1.14	Tb927.2.300,Tb927.2.420,Tb927.2.460,Tb927.2.540,Tb927.4.230,Tb927.6.5190	1.12433	1.19535
Tb427_000747100.1-p1-CDS9	Tb427_000747100.1	unitig_223_Tb427v10	Tb11.v5.1020	retrotransposon hot spot (RHS) protein	RHS	hypothetical protein, conserved	17	-0.0688	NA	0	0.64	31.5	189	37	36	72	6	8	5	1.08	1.29	2.03	0.68	1.03	0.71	Tb11.v5.1020,Tb927.1.240,Tb927.1.500,Tb927.10.16200,Tb927.11.18610,Tb927.11.18630	1.14405	1.19535
Tb427_000247800.1-p1-CDS1	Tb427_000247800.1	Chr1_3B_Tb427v10	Tb11.v5.1020	retrotransposon hot spot (RHS) protein	RHS	Reverse transcriptase (RNA-dependent DNA polymerase)	22	0.047	NA	0	1	28.14	197	50	47	68	7	11	9	1.45	1.69	1.92	0.79	1.42	1.28	Tb11.v5.1020,Tb927.1.240,Tb927.1.500,Tb927.10.16200,Tb927.11.18610,Tb927.11.18630	1.23266	1.19535
Tb427_060008700.1-p1-CDS1	Tb427_060008700.1	Chr6_core_Tb427v10	Tb927.10.40	hypothetical protein	ZUnknown	hypothetical protein, conserved	23	-0.1221	NA	0	0.81	2.11	19	92	44	60	9	6	10	2.68	1.58	1.69	1.02	0.77	1.42	Tb927.10.40	1.25096	1.19535
Tb427_000022700.1-p1-CDS5	Tb427_000022700.1	BES5_Tb427v10	Tb05.5K5.350	ESAG3 pseudogene	ESAG.pseudo	hypothetical protein, conserved	18	0.0047	NA	0	0.76	235.5	1884	30	36	64	8	5	10	0.87	1.29	1.81	0.91	0.64	1.42	Tb05.5K5.350,Tb05.5K5.420,Tb05.5K5.500,Tb08.27P2.160,Tb08.27P2.250,Tb08.27P2.330,Tb08.27P2.400,Tb08.27P2.520,Tb09.v4.0024,Tb09.v4.0027,Tb09.v4.0033,Tb09.v4.0045,Tb09.v4.0062,Tb09.v4.0083,Tb09.v4.0100,Tb09.v4.0115,Tb09.v4.0130,Tb09.v4.0132,Tb09.v4.0154,Tb09.v4.0160,Tb09.v4.0172,Tb09.v4.0181,Tb09.v4.0201,Tb09.v4.0206,Tb10.v4.0057,Tb10.v4.0066,Tb10.v4.0074,Tb10.v4.0090,Tb10.v4.0101,Tb10.v4.0137,Tb10…	1.29866	1.19535
Tb427_000817400.1-p1-CDS1	Tb427_000817400.1	unitig_302_Tb427v10	Tb927.1.275	ESAG4 pseudogene	ESAG.pseudo	hypothetical protein, conserved	23	-0.0634	NA	0	0.87	27.8	278	71	54	56	10	15	3	2.06	1.94	1.58	1.14	1.93	0.43	Tb927.1.275,Tb927.2.1260,Tb927.4.130,Tb927.6.100	1.42223	1.19535
Tb427_000222800.1-p1-CDS3	Tb427_000222800.1	Chr1_3A_Tb427v10	Tb09.v4.0041	leucine-rich repeat protein LRRP, pseudogene	LRRP	Leucine Rich repeat	18	-0.1615	NA	0	0.56	8.75	70	40	48	64	8	4	7	1.16	1.72	1.81	0.91	0.52	1	Tb09.v4.0041,Tb11.v5.0448,Tb11.v5.0551,Tb11.v5.0560,Tb11.v5.0602,Tb11.v5.0703,Tb11.v5.0838,Tb927.1.290,Tb927.1.370,Tb927.1.480,Tb927.11.1500,Tb927.11.1510,Tb927.2.1310,Tb927.2.170,Tb927.2.690,Tb927.2.950,Tb927.3.1490,Tb927.4.160,Tb927.6.130,Tb927.7.7540,Tb927.9.14540	1.53107	1.19535
Tb427_000838200.1-p1-CDS1	Tb427_000838200.1	unitig_517_Tb427v10	Tb09.v4.0041	leucine-rich repeat protein LRRP, pseudogene	LRRP	hypothetical protein	19	-0.1043	NA	0	0.65	34.92	419	59	33	48	12	5	8	1.72	1.18	1.36	1.36	0.64	1.14	Tb09.v4.0041,Tb11.v5.0448,Tb11.v5.0551,Tb11.v5.0560,Tb11.v5.0602,Tb11.v5.0703,Tb11.v5.0838,Tb927.1.290,Tb927.1.370,Tb927.1.480,Tb927.11.1500,Tb927.11.1510,Tb927.2.1310,Tb927.2.170,Tb927.2.690,Tb927.2.950,Tb927.3.1490,Tb927.4.160,Tb927.6.130,Tb927.7.7540,Tb927.9.14540	1.67356	1.19535
Tb427_000808200.1-p1-CDS1	Tb427_000808200.1	unitig_284_Tb427v10	Tb927.2.300	DNA-directed RNA polymerase, pseudogene	Pseudogene	RNA polymerase Rpb2, domain 4	19	-0.2081	NA	0	0.53	29.2	292	65	42	56	10	9	2	1.89	1.51	1.58	1.14	1.16	0.28	Tb927.2.300,Tb927.2.420,Tb927.2.460,Tb927.2.540,Tb927.4.230,Tb927.6.5190	1.70044	1.19535
Tb427_000576700.1-p1-CDS9	Tb427_000576700.1	Chr9_3A_Tb427v10	Tb11.v5.1020	retrotransposon hot spot (RHS) protein	RHS	Reverse transcriptase (RNA-dependent DNA polymerase)	21	-0.106	NA	0	0.73	1.8	18	61	48	56	10	12	3	1.77	1.72	1.58	1.14	1.55	0.43	Tb11.v5.1020,Tb927.1.240,Tb927.1.500,Tb927.10.16200,Tb927.11.18610,Tb927.11.18630	1.83188	1.19535
Tb427_000785800.1-p1-CDS4	Tb427_000785800.1	unitig_2501_Tb427v10	Tb09.v4.0013	retrotransposon hot spot (RHS) protein	RHS	Retrotransposon hot spot protein	22	-0.141	NA	0	0.73	60.09	661	63	61	52	11	11	4	1.83	2.19	1.47	1.25	1.42	0.57	Tb09.v4.0013,Tb09.v4.0067,Tb11.0820,Tb11.1780,Tb11.v5.0214,Tb11.v5.0294,Tb11.v5.0295,Tb11.v5.0325,Tb11.v5.0326,Tb11.v5.0353,Tb11.v5.0489,Tb11.v5.0532,Tb11.v5.0533,Tb11.v5.0594,Tb11.v5.0624,Tb11.v5.0670,Tb11.v5.0693,Tb11.v5.0839,Tb927.1.120,Tb927.1.180,Tb927.1.190,Tb927.1.220,Tb927.1.70,Tb927.1.90,Tb927.10.110,Tb927.10.70,Tb927.2.100,Tb927.2.1120,Tb927.2.1180,Tb927.2.1210,Tb927.2.270,Tb927.2.280,T…	2.0635	1.19535
Tb427_000641200.1-p1-CDS1	Tb427_000641200.1	unitig_168_Tb427v10	Tb927.11.17840	retrotransposon hot spot protein (RHS, pseudogene)	RHS	Retrotransposon hot spot protein	21	-0.0901	NA	0	0.75	17.18	189	63	41	52	11	8	7	1.83	1.47	1.47	1.25	1.03	1	Tb927.11.17840,Tb927.2.720,Tb927.2.980,Tb927.4.190,Tb927.5.160	2.09424	1.19535
Tb427_000629900.1-p1-CDS1	Tb427_000629900.1	Tb427VSG-1389_unitig_restricted_Tb427v10	Tb927.7.6500	variant surface glycoprotein (VSG)	VSG	Trypanosome variant surface glycoprotein C-terminal domain containing protein	19	-0.0469	NA	0	0.68	3	33	39	37	52	11	10	4	1.13	1.33	1.47	1.25	1.29	0.57	Tb927.7.6500	2.09424	1.19535
Tb427_000822200.1-p1-CDS1	Tb427_000822200.1	unitig_307_Tb427v10	Tb927.1.490	hypothetical protein	ZUnknown	hypothetical protein, conserved	20	-0.1342	NA	0	0.66	27.8	278	68	36	56	10	4	9	1.98	1.29	1.58	1.14	0.52	1.28	Tb927.1.490,Tb927.4.180,Tb927.9.740	2.11437	1.19535
Tb427_000499400.1-p1-CDS1	Tb427_000499400.1	Chr8_3A_Tb427v10	Tb927.9.780	hypothetical protein	ZUnknown	hypothetical protein, conserved	19	-0.1499	NA	0	0.6	26.09	287	48	45	52	11	5	7	1.4	1.62	1.47	1.25	0.64	1	Tb927.9.780	1.10434	1.20163
Tb427_000696000.1-p1-CDS1	Tb427_000696000.1	unitig_1976_Tb427v10	Tb927.1.270	hypothetical protein	ZUnknown	hypothetical protein, conserved	19	-0.155	NA	0	0.59	40.2	201	58	41	77	5	7	5	1.69	1.47	2.17	0.57	0.9	0.71	Tb927.1.270,Tb927.2.1250,Tb927.2.650,Tb927.2.900,Tb927.4.120	1.17632	1.20163
Tb427_000747800.1-p1-CDS22	Tb427_000747800.1	unitig_2246_Tb427v10	Tb927.2.300	DNA-directed RNA polymerase, pseudogene	Pseudogene	RNA polymerase Rpb2, domain 6	23	-0.0995	NA	0	0.85	5	30	74	57	73	6	6	11	2.15	2.05	2.06	0.68	0.77	1.57	Tb927.2.300,Tb927.2.420,Tb927.2.460,Tb927.2.540,Tb927.4.230,Tb927.6.5190	1.28096	1.20163
Tb427_000738500.1-p1-CDS1	Tb427_000738500.1	unitig_2218_Tb427v10	Tb927.1.410	retrotransposon hot spot protein (RHS, pseudogene)	RHS	Retrotransposon hot spot protein	29	0.0886	NA	0	1.38	57.33	344	80	72	73	6	16	12	2.33	2.59	2.06	0.68	2.06	1.71	Tb927.1.410,Tb927.6.150	1.31615	1.20163
Tb427_000139200.1-p1-CDS1	Tb427_000139200.1	Chr11_3A_Tb427v10	Tb11.v5.1020	retrotransposon hot spot (RHS) protein	RHS	Endonuclease-reverse transcriptase	24	0.0233	NA	0	1.02	41.14	288	65	50	69	7	14	7	1.89	1.8	1.95	0.79	1.8	1	Tb11.v5.1020,Tb927.1.240,Tb927.1.500,Tb927.10.16200,Tb927.11.18610,Tb927.11.18630	1.47508	1.20163
Tb427_000794900.1-p1-CDS3	Tb427_000794900.1	unitig_2569_Tb427v10	Tb10.v4.0215	hypothetical protein	ZUnknown	hypothetical protein, conserved	22	-0.1924	NA	0	0.68	62.67	564	69	63	61	9	10	4	2.01	2.26	1.72	1.02	1.29	0.57	Tb10.v4.0215,Tb927.9.15820	1.5008	1.20163
Tb427_000725900.1-p1-CDS4	Tb427_000725900.1	unitig_2174_Tb427v10	Tb10.v4.0215	hypothetical protein	ZUnknown	hypothetical protein, conserved	21	-0.1623	NA	0	0.66	17.78	160	67	44	61	9	4	9	1.95	1.58	1.72	1.02	0.52	1.28	Tb10.v4.0215,Tb927.9.15820	1.52607	1.20163
Tb427_000443200.1-p1-CDS1	Tb427_000443200.1	Chr6_3B_Tb427v10	Tb11.v5.1020	retrotransposon hot spot (RHS) protein	RHS	Reverse transcriptase (RNA-dependent DNA polymerase)	21	0.0381	NA	0	0.88	20	260	47	40	45	13	11	7	1.37	1.44	1.27	1.48	1.42	1	Tb11.v5.1020,Tb927.1.240,Tb927.1.500,Tb927.10.16200,Tb927.11.18610,Tb927.11.18630	1.7137	1.20163
Tb427_000799500.1-p1-CDS3	Tb427_000799500.1	unitig_2611_Tb427v10	Tb10.v4.0215	hypothetical protein	ZUnknown	hypothetical protein, conserved	22	-0.2574	NA	0	0.58	18.25	146	76	61	65	8	8	4	2.21	2.19	1.84	0.91	1.03	0.57	Tb10.v4.0215,Tb927.9.15820	1.75275	1.20163
Tb427_000712900.1-p1-CDS1	Tb427_000712900.1	unitig_2120_Tb427v10	Tb927.5.293b	hypothetical protein	ZUnknown	Protein of unknown function (DUF2974)	26	0.0905	NA	0	1.16	19.6	196	61	58	57	10	16	8	1.77	2.08	1.61	1.14	2.06	1.14	Tb927.5.293b	1.81147	1.20163
Tb427_000791200.1-p1-CDS4	Tb427_000791200.1	unitig_2565_Tb427v10	Tb10.v4.0215	hypothetical protein	ZUnknown	hypothetical protein, conserved	25	-0.2043	NA	0	0.73	11.27	124	95	63	53	11	9	6	2.76	2.26	1.5	1.25	1.16	0.85	Tb10.v4.0215,Tb927.9.15820	1.852	1.20163
Tb427_090092800.1-p1-CDS1	Tb427_090092800.1	Chr9_core_Tb427v10	Tb10.v4.0215	hypothetical protein	ZUnknown	hypothetical protein, conserved	22	0.0509	NA	0	0.95	13.27	146	47	44	53	11	6	13	1.37	1.58	1.5	1.25	0.77	1.85	Tb10.v4.0215,Tb927.9.15820	1.87578	1.20163
Tb427_000644600.1-p1-CDS1	Tb427_000644600.1	unitig_1835_Tb427v10	Tb05.5K5.180	GRESAG 4 receptor-type adenylate cyclase	GRESAG	Adenylate and Guanylate cyclase catalytic domain containing protein	24	0.0531	NA	0	1.09	41.71	292	62	52	70	7	8	14	1.8	1.87	1.98	0.79	1.03	1.99	Tb05.5K5.180,Tb05.5K5.190,Tb09.v4.0009,Tb11.v5.0209,Tb11.v5.0217,Tb11.v5.0281,Tb11.v5.0379,Tb11.v5.0380,Tb11.v5.0424,Tb11.v5.0425,Tb11.v5.0429,Tb11.v5.0431,Tb11.v5.0456,Tb11.v5.0470,Tb11.v5.0484,Tb11.v5.0546,Tb11.v5.0576,Tb11.v5.0654,Tb11.v5.0784,Tb11.v5.0821,Tb11.v5.0830,Tb11.v5.0864,Tb11.v5.0865,Tb11.v5.1015,Tb11.v5.1016,Tb927.10.13040,Tb927.10.16000,Tb927.10.16190,Tb927.10.2430,Tb927.11.13740,…	1.90304	1.20163
Tb427_000644600.1-p1-CDS4	Tb427_000644600.1	unitig_1835_Tb427v10	Tb05.5K5.180	GRESAG 4 receptor-type adenylate cyclase	GRESAG	Adenylate and Guanylate cyclase catalytic domain containing protein	26	0.265	NA	0	1.45	19.25	154	67	35	66	8	18	12	1.95	1.26	1.86	0.91	2.32	1.71	Tb05.5K5.180,Tb05.5K5.190,Tb09.v4.0009,Tb11.v5.0209,Tb11.v5.0217,Tb11.v5.0281,Tb11.v5.0379,Tb11.v5.0380,Tb11.v5.0424,Tb11.v5.0425,Tb11.v5.0429,Tb11.v5.0431,Tb11.v5.0456,Tb11.v5.0470,Tb11.v5.0484,Tb11.v5.0546,Tb11.v5.0576,Tb11.v5.0654,Tb11.v5.0784,Tb11.v5.0821,Tb11.v5.0830,Tb11.v5.0864,Tb11.v5.0865,Tb11.v5.1015,Tb11.v5.1016,Tb927.10.13040,Tb927.10.16000,Tb927.10.16190,Tb927.10.2430,Tb927.11.13740,…	2.16027	1.20163
Tb427_000701900.1-p1-CDS6	Tb427_000701900.1	unitig_2016_Tb427v10	Tb05.5K5.180	GRESAG 4 receptor-type adenylate cyclase	GRESAG	Adenylate and Guanylate cyclase catalytic domain containing protein	22	0.0112	NA	0	0.87	25.91	285	46	47	54	11	11	7	1.34	1.69	1.52	1.25	1.42	1	Tb05.5K5.180,Tb05.5K5.190,Tb09.v4.0009,Tb11.v5.0209,Tb11.v5.0217,Tb11.v5.0281,Tb11.v5.0379,Tb11.v5.0380,Tb11.v5.0424,Tb11.v5.0425,Tb11.v5.0429,Tb11.v5.0431,Tb11.v5.0456,Tb11.v5.0470,Tb11.v5.0484,Tb11.v5.0546,Tb11.v5.0576,Tb11.v5.0654,Tb11.v5.0784,Tb11.v5.0821,Tb11.v5.0830,Tb11.v5.0864,Tb11.v5.0865,Tb11.v5.1015,Tb11.v5.1016,Tb927.10.13040,Tb927.10.16000,Tb927.10.16190,Tb927.10.2430,Tb927.11.13740,…	1.26303	1.20789
Tb427_000813500.1-p1-CDS1	Tb427_000813500.1	unitig_2996_Tb427v10	Tb09.v4.0041	leucine-rich repeat protein LRRP, pseudogene	LRRP	hypothetical protein	25	0.0303	NA	0	1.07	26.25	210	77	47	66	8	13	9	2.24	1.69	1.86	0.91	1.68	1.28	Tb09.v4.0041,Tb11.v5.0448,Tb11.v5.0551,Tb11.v5.0560,Tb11.v5.0602,Tb11.v5.0703,Tb11.v5.0838,Tb927.1.290,Tb927.1.370,Tb927.1.480,Tb927.11.1500,Tb927.11.1510,Tb927.2.1310,Tb927.2.170,Tb927.2.690,Tb927.2.950,Tb927.3.1490,Tb927.4.160,Tb927.6.130,Tb927.7.7540,Tb927.9.14540	1.29866	1.20789
Tb427_000693700.1-p1-CDS1	Tb427_000693700.1	unitig_1970_Tb427v10	Tb09.v4.0041	leucine-rich repeat protein LRRP, pseudogene	LRRP	hypothetical protein	21	0.0193	NA	0	0.86	18.73	206	58	33	54	11	13	5	1.69	1.18	1.52	1.25	1.68	0.71	Tb09.v4.0041,Tb11.v5.0448,Tb11.v5.0551,Tb11.v5.0560,Tb11.v5.0602,Tb11.v5.0703,Tb11.v5.0838,Tb927.1.290,Tb927.1.370,Tb927.1.480,Tb927.11.1500,Tb927.11.1510,Tb927.2.1310,Tb927.2.170,Tb927.2.690,Tb927.2.950,Tb927.3.1490,Tb927.4.160,Tb927.6.130,Tb927.7.7540,Tb927.9.14540	1.31615	1.20789
Tb427_000500200.1-p1-CDS1	Tb427_000500200.1	Chr8_3B_Tb427v10	Tb927.2.300	DNA-directed RNA polymerase, pseudogene	Pseudogene	RNA polymerase Rpb2, domain 4	30	0.1696	NA	0	1.46	32.5	260	81	60	66	8	16	14	2.36	2.15	1.86	0.91	2.06	1.99	Tb927.2.300,Tb927.2.420,Tb927.2.460,Tb927.2.540,Tb927.4.230,Tb927.6.5190	1.31615	1.20789
Tb427_000682400.1-p1-CDS1	Tb427_000682400.1	unitig_1912_Tb427v10	Tb09.v4.0013	retrotransposon hot spot (RHS) protein	RHS	Retrotransposon hot spot protein	25	-0.0437	NA	0	0.97	51	306	74	59	74	6	11	9	2.15	2.12	2.09	0.68	1.42	1.28	Tb09.v4.0013,Tb09.v4.0067,Tb11.0820,Tb11.1780,Tb11.v5.0214,Tb11.v5.0294,Tb11.v5.0295,Tb11.v5.0325,Tb11.v5.0326,Tb11.v5.0353,Tb11.v5.0489,Tb11.v5.0532,Tb11.v5.0533,Tb11.v5.0594,Tb11.v5.0624,Tb11.v5.0670,Tb11.v5.0693,Tb11.v5.0839,Tb927.1.120,Tb927.1.180,Tb927.1.190,Tb927.1.220,Tb927.1.70,Tb927.1.90,Tb927.10.110,Tb927.10.70,Tb927.2.100,Tb927.2.1120,Tb927.2.1180,Tb927.2.1210,Tb927.2.270,Tb927.2.280,T…	1.33342	1.20789
Tb427_000666900.1-p1-CDS9	Tb427_000666900.1	unitig_1881_Tb427v10	Tb11.v5.1020	retrotransposon hot spot (RHS) protein	RHS	Reverse transcriptase (RNA-dependent DNA polymerase)	18	-0.133	NA	0	0.58	23.88	191	46	38	66	8	8	4	1.34	1.36	1.86	0.91	1.03	0.57	Tb11.v5.1020,Tb927.1.240,Tb927.1.500,Tb927.10.16200,Tb927.11.18610,Tb927.11.18630	1.46989	1.20789
Tb427_000672200.1-p1-CDS1	Tb427_000672200.1	unitig_1898_Tb427v10	Tb09.v4.0013	retrotransposon hot spot (RHS) protein	RHS	Retrotransposon hot spot protein	29	-0.1161	NA	0	1.02	36.22	326	114	74	62	9	13	8	3.32	2.66	1.75	1.02	1.68	1.14	Tb09.v4.0013,Tb09.v4.0067,Tb11.0820,Tb11.1780,Tb11.v5.0214,Tb11.v5.0294,Tb11.v5.0295,Tb11.v5.0325,Tb11.v5.0326,Tb11.v5.0353,Tb11.v5.0489,Tb11.v5.0532,Tb11.v5.0533,Tb11.v5.0594,Tb11.v5.0624,Tb11.v5.0670,Tb11.v5.0693,Tb11.v5.0839,Tb927.1.120,Tb927.1.180,Tb927.1.190,Tb927.1.220,Tb927.1.70,Tb927.1.90,Tb927.10.110,Tb927.10.70,Tb927.2.100,Tb927.2.1120,Tb927.2.1180,Tb927.2.1210,Tb927.2.270,Tb927.2.280,T…	1.51602	1.20789
Tb427_010026500.1-p1-CDS8	Tb427_010026500.1	Chr1_core_Tb427v10	Tb11.v5.1020	retrotransposon hot spot (RHS) protein	RHS	Reverse transcriptase (RNA-dependent DNA polymerase)	23	0.091	NA	0	1.04	13.36	147	54	42	54	11	9	12	1.57	1.51	1.52	1.25	1.16	1.71	Tb11.v5.1020,Tb927.1.240,Tb927.1.500,Tb927.10.16200,Tb927.11.18610,Tb927.11.18630	1.54102	1.20789
Tb427_000674000.1-p1-CDS4	Tb427_000674000.1	unitig_1900_Tb427v10	Tb09.v4.0013	retrotransposon hot spot (RHS) protein	RHS	Retrotransposon hot spot protein	21	-0.1026	NA	0	0.69	26.58	319	43	54	50	12	6	8	1.25	1.94	1.41	1.36	0.77	1.14	Tb09.v4.0013,Tb09.v4.0067,Tb11.0820,Tb11.1780,Tb11.v5.0214,Tb11.v5.0294,Tb11.v5.0295,Tb11.v5.0325,Tb11.v5.0326,Tb11.v5.0353,Tb11.v5.0489,Tb11.v5.0532,Tb11.v5.0533,Tb11.v5.0594,Tb11.v5.0624,Tb11.v5.0670,Tb11.v5.0693,Tb11.v5.0839,Tb927.1.120,Tb927.1.180,Tb927.1.190,Tb927.1.220,Tb927.1.70,Tb927.1.90,Tb927.10.110,Tb927.10.70,Tb927.2.100,Tb927.2.1120,Tb927.2.1180,Tb927.2.1210,Tb927.2.270,Tb927.2.280,T…	1.58496	1.20789
Tb427_010005200.1-p1-CDS3	Tb427_010005200.1	Chr1_core_Tb427v10	Tb927.1.520	VSG pseudogene,variant surface glycoprotein, fragment	VSG	Trypanosome variant surface glycoprotein C-terminal domain containing protein	20	-0.0985	NA	0	0.69	1.8	9	68	33	78	5	7	7	1.98	1.18	2.2	0.57	0.9	1	Tb927.1.520	1.66448	1.20789
Tb427_000754000.1-p1-CDS1	Tb427_000754000.1	unitig_2313_Tb427v10	Tb927.11.18620	variant surface glycoprotein (VSG)	VSG	hypothetical protein	22	0.0829	NA	0	0.95	24.45	269	47	37	54	11	15	5	1.37	1.33	1.52	1.25	1.93	0.71	Tb927.11.18620,Tb927.11.19850	1.67356	1.20789
Tb427_000834200.1-p1-CDS1	Tb427_000834200.1	unitig_407_Tb427v10	Tb927.1.270	hypothetical protein	ZUnknown	hypothetical protein, conserved	25	0.0422	NA	0	1.12	103.4	517	71	54	78	5	13	10	2.06	1.94	2.2	0.57	1.68	1.42	Tb927.1.270,Tb927.2.1250,Tb927.2.650,Tb927.2.900,Tb927.4.120	1.70044	1.20789
Tb427_000501100.1-p1-CDS1	Tb427_000501100.1	Chr8_5A_Tb427v10	Tb10.v4.0215	hypothetical protein	ZUnknown	hypothetical protein, conserved	19	-0.0691	NA	0	0.69	13.22	119	47	35	62	9	7	7	1.37	1.26	1.75	1.02	0.9	1	Tb10.v4.0215,Tb927.9.15820	1.73118	1.20789
Tb427_100046200.1-p1-CDS1	Tb427_100046200.1	Chr10_core_Tb427v10	Tb927.10.4190	hypothetical protein	ZUnknown	hypothetical protein, conserved	21	-0.0337	NA	0	0.83	1	9	54	45	62	9	8	9	1.57	1.62	1.75	1.02	1.03	1.28	Tb927.10.4190	1.76129	1.20789
Tb427_100068600.1-p1-CDS3	Tb427_100068600.1	Chr10_core_Tb427v10	Tb927.10.6420	hypothetical protein	ZUnknown	hypothetical protein, conserved	21	-0.0272	NA	0	0.8	1	12	67	28	50	12	5	11	1.95	1.01	1.41	1.36	0.64	1.57	Tb927.10.6420	1.82375	1.20789
Tb427_000724800.1-p1-CDS1	Tb427_000724800.1	unitig_2171_Tb427v10	Tb927.1.275	ESAG4 pseudogene	ESAG.pseudo	hypothetical protein, conserved	23	0.1464	NA	0	1.11	29.5	295	53	39	58	10	14	9	1.54	1.4	1.64	1.14	1.8	1.28	Tb927.1.275,Tb927.2.1260,Tb927.4.130,Tb927.6.100	1.93357	1.20789
Tb427_000639900.1-p1-CDS1	Tb427_000639900.1	unitig_166_Tb427v10	Tb927.1.400	hypothetical protein, conserved	ZUnknown	hypothetical protein, conserved	23	-0.0826	NA	0	0.83	16.4	164	65	53	58	10	9	8	1.89	1.9	1.64	1.14	1.16	1.14	Tb927.1.400	1.96347	1.20789
Tb427_000734700.1-p1-CDS2	Tb427_000734700.1	unitig_2213_Tb427v10	Tb05.5K5.180	GRESAG 4 receptor-type adenylate cyclase	GRESAG	Adenylate and Guanylate cyclase catalytic domain containing protein	22	0.057	NA	0	0.93	10.31	134	58	33	46	13	9	10	1.69	1.18	1.3	1.48	1.16	1.42	Tb05.5K5.180,Tb05.5K5.190,Tb09.v4.0009,Tb11.v5.0209,Tb11.v5.0217,Tb11.v5.0281,Tb11.v5.0379,Tb11.v5.0380,Tb11.v5.0424,Tb11.v5.0425,Tb11.v5.0429,Tb11.v5.0431,Tb11.v5.0456,Tb11.v5.0470,Tb11.v5.0484,Tb11.v5.0546,Tb11.v5.0576,Tb11.v5.0654,Tb11.v5.0784,Tb11.v5.0821,Tb11.v5.0830,Tb11.v5.0864,Tb11.v5.0865,Tb11.v5.1015,Tb11.v5.1016,Tb927.10.13040,Tb927.10.16000,Tb927.10.16190,Tb927.10.2430,Tb927.11.13740,…	2.0036	1.20789
Tb427_000656200.1-p1-CDS1	Tb427_000656200.1	unitig_1853_Tb427v10	Tb09.v4.0152	hypothetical protein	ZUnknown	hypothetical protein, conserved	16	-0.0337	NA	0	0.58	18.38	239	26	25	46	13	8	4	0.76	0.9	1.3	1.48	1.03	0.57	Tb09.v4.0152,Tb927.11.17830,Tb927.9.760	2.04614	1.20789
Tb427_110087400.1-p1-CDS1	Tb427_110087400.1	Chr11_core_Tb427v10	Tb927.11.7990	hypothetical protein	ZUnknown	hypothetical protein, conserved	22	0.2136	NA	0	1.13	1	13	41	27	46	13	11	12	1.19	0.97	1.3	1.48	1.42	1.71	Tb927.11.7990	1.0072	1.21412
Tb427_000727500.1-p1-CDS2	Tb427_000727500.1	unitig_2175_Tb427v10	Tb09.v4.0013	retrotransposon hot spot (RHS) protein	RHS	Retrotransposon hot spot protein	21	-0.2371	NA	0	0.58	72.71	509	71	55	71	7	6	6	2.06	1.97	2	0.79	0.77	0.85	Tb09.v4.0013,Tb09.v4.0067,Tb11.0820,Tb11.1780,Tb11.v5.0214,Tb11.v5.0294,Tb11.v5.0295,Tb11.v5.0325,Tb11.v5.0326,Tb11.v5.0353,Tb11.v5.0489,Tb11.v5.0532,Tb11.v5.0533,Tb11.v5.0594,Tb11.v5.0624,Tb11.v5.0670,Tb11.v5.0693,Tb11.v5.0839,Tb927.1.120,Tb927.1.180,Tb927.1.190,Tb927.1.220,Tb927.1.70,Tb927.1.90,Tb927.10.110,Tb927.10.70,Tb927.2.100,Tb927.2.1120,Tb927.2.1180,Tb927.2.1210,Tb927.2.270,Tb927.2.280,T…	1.19535	1.21412
Tb427_000740600.1-p1-CDS5	Tb427_000740600.1	unitig_2219_Tb427v10	Tb09.v4.0041	leucine-rich repeat protein LRRP, pseudogene	LRRP	Leucine Rich repeat	18	-0.2178	NA	0	0.48	18	162	53	39	63	9	6	4	1.54	1.4	1.78	1.02	0.77	0.57	Tb09.v4.0041,Tb11.v5.0448,Tb11.v5.0551,Tb11.v5.0560,Tb11.v5.0602,Tb11.v5.0703,Tb11.v5.0838,Tb927.1.290,Tb927.1.370,Tb927.1.480,Tb927.11.1500,Tb927.11.1510,Tb927.2.1310,Tb927.2.170,Tb927.2.690,Tb927.2.950,Tb927.3.1490,Tb927.4.160,Tb927.6.130,Tb927.7.7540,Tb927.9.14540	1.21412	1.21412
Tb427_000584000.1-p1-CDS1	Tb427_000584000.1	Chr9_3A_Tb427v10	Tb09.v4.0042	leucine-rich repeat protein LRRP, pseudogene	LRRP	hypothetical protein, conserved	22	0.0587	NA	0	0.92	20.21	283	43	44	43	14	10	9	1.25	1.58	1.21	1.59	1.29	1.28	Tb09.v4.0042,Tb09.v4.0104	1.28688	1.21412
Tb427_000496000.1-p1-CDS1	Tb427_000496000.1	Chr8_3A_Tb427v10	Tb09.v4.0013	retrotransposon hot spot (RHS) protein	RHS	Retrotransposon hot spot protein	22	-0.0125	NA	0	0.88	123	984	56	44	67	8	8	10	1.63	1.58	1.89	0.91	1.03	1.42	Tb09.v4.0013,Tb09.v4.0067,Tb11.0820,Tb11.1780,Tb11.v5.0214,Tb11.v5.0294,Tb11.v5.0295,Tb11.v5.0325,Tb11.v5.0326,Tb11.v5.0353,Tb11.v5.0489,Tb11.v5.0532,Tb11.v5.0533,Tb11.v5.0594,Tb11.v5.0624,Tb11.v5.0670,Tb11.v5.0693,Tb11.v5.0839,Tb927.1.120,Tb927.1.180,Tb927.1.190,Tb927.1.220,Tb927.1.70,Tb927.1.90,Tb927.10.110,Tb927.10.70,Tb927.2.100,Tb927.2.1120,Tb927.2.1180,Tb927.2.1210,Tb927.2.270,Tb927.2.280,T…	1.29866	1.21412
Tb427_000729600.1-p1-CDS2	Tb427_000729600.1	unitig_2196_Tb427v10	Tb11.v5.1020	retrotransposon hot spot (RHS) protein	RHS	Reverse transcriptase (RNA-dependent DNA polymerase)	42	-0.2625	NA	0	0.9	8.25	99	210	158	51	12	13	6	6.11	5.67	1.44	1.36	1.68	0.85	Tb11.v5.1020,Tb927.1.240,Tb927.1.500,Tb927.10.16200,Tb927.11.18610,Tb927.11.18630	1.75275	1.21412
Tb427_000818000.1-p1-CDS2	Tb427_000818000.1	unitig_302_Tb427v10	Tb927.9.780	hypothetical protein	ZUnknown	hypothetical protein, conserved	25	-0.3128	NA	0	0.57	10.38	83	101	77	67	8	8	4	2.94	2.76	1.89	0.91	1.03	0.57	Tb927.9.780	1.88753	1.21412
Tb427_000831300.1-p1-CDS1	Tb427_000831300.1	unitig_348_Tb427v10	Tb11.v5.0655	trypanosome RHS family	ZUnknown	Endonuclease-reverse transcriptase	23	-0.1624	NA	0	0.71	17.73	195	68	61	55	11	10	5	1.98	2.19	1.55	1.25	1.29	0.71	Tb11.v5.0655,Tb927.1.430,Tb927.1.450,Tb927.2.1140,Tb927.2.830,Tb927.4.110	2.03562	1.21412
Tb427_000694700.1-p1-CDS1	Tb427_000694700.1	unitig_1973_Tb427v10	Tb09.v4.0152	hypothetical protein	ZUnknown	hypothetical protein, conserved	17	-0.1346	NA	0	0.47	16.25	195	36	31	51	12	8	2	1.05	1.11	1.44	1.36	1.03	0.28	Tb09.v4.0152,Tb927.11.17830,Tb927.9.760	2.14078	1.21412
Tb427_000798400.1-p1-CDS4	Tb427_000798400.1	unitig_2610_Tb427v10	Tb927.9.780	hypothetical protein	ZUnknown	hypothetical protein, conserved	21	-0.3323	NA	0	0.43	14	84	93	55	75	6	5	4	2.7	1.97	2.12	0.68	0.64	0.57	Tb927.9.780	2.16027	1.21412
Tb427_000738000.1-p1-CDS1	Tb427_000738000.1	unitig_2217_Tb427v10	Tb927.2.300	DNA-directed RNA polymerase, pseudogene	Pseudogene	RNA polymerase Rpb2, domain 4	22	-0.1315	NA	0	0.73	19.7	197	69	48	59	10	6	9	2.01	1.72	1.67	1.14	0.77	1.28	Tb927.2.300,Tb927.2.420,Tb927.2.460,Tb927.2.540,Tb927.4.230,Tb927.6.5190	2.25096	1.21412
Tb427_000675300.1-p1-CDS1	Tb427_000675300.1	unitig_1902_Tb427v10	Tb927.2.300	DNA-directed RNA polymerase, pseudogene	Pseudogene	RNA polymerase Rpb2, domain 4	21	-0.0583	NA	0	0.79	25.9	259	55	45	59	10	5	11	1.6	1.62	1.67	1.14	0.64	1.57	Tb927.2.300,Tb927.2.420,Tb927.2.460,Tb927.2.540,Tb927.4.230,Tb927.6.5190	1.42761	1.22651
Tb427_000807800.1-p1-CDS1	Tb427_000807800.1	unitig_2801_Tb427v10	Tb10.v4.0215	hypothetical protein	ZUnknown	hypothetical protein, conserved	23	-0.1188	NA	0	0.76	13	130	83	43	59	10	10	6	2.41	1.54	1.67	1.14	1.29	0.85	Tb10.v4.0215,Tb927.9.15820	1.45418	1.22651
Tb427_000713000.1-p1-CDS1	Tb427_000713000.1	unitig_2120_Tb427v10	Tb927.5.294b	hypothetical protein	ZUnknown	hypothetical protein, conserved	19	-0.1983	NA	0	0.53	10.8	108	58	39	59	10	5	6	1.69	1.4	1.67	1.14	0.64	0.85	Tb927.5.294b	1.63691	1.22651
Tb427_000649900.1-p1-CDS1	Tb427_000649900.1	unitig_1843_Tb427v10	Tb927.11.17840	retrotransposon hot spot protein (RHS, pseudogene)	RHS	Retrotransposon hot spot protein	23	0.0085	NA	0	0.96	35	175	74	38	80	5	10	10	2.15	1.36	2.26	0.57	1.29	1.42	Tb927.11.17840,Tb927.2.720,Tb927.2.980,Tb927.4.190,Tb927.5.160	1.99639	1.22651
Tb427_090011000.1-p1-CDS2	Tb427_090011000.1	Chr9_core_Tb427v10	Tb05.5K5.310	ESAG3	ESAG	hypothetical protein, conserved	14	-0.225	NA	0	0.29	2.78	25	33	25	64	9	3	3	0.96	0.9	1.81	1.02	0.39	0.43	Tb05.5K5.310,Tb927.1.20,Tb927.11.17340,Tb927.5.260,Tb927.5.4660,Tb927.6.5400,Tb927.6.5510,Tb927.6.5720,Tb927.8.120,Tb927.9.16260	2.15056	1.22651
Tb427_000819200.1-p1-CDS2	Tb427_000819200.1	unitig_3033_Tb427v10	Tb05.5K5.180	GRESAG 4 receptor-type adenylate cyclase	GRESAG	hypothetical protein, conserved	24	-0.0955	NA	0	0.86	44.13	353	71	60	68	8	10	8	2.06	2.15	1.92	0.91	1.29	1.14	Tb05.5K5.180,Tb05.5K5.190,Tb09.v4.0009,Tb11.v5.0209,Tb11.v5.0217,Tb11.v5.0281,Tb11.v5.0379,Tb11.v5.0380,Tb11.v5.0424,Tb11.v5.0425,Tb11.v5.0429,Tb11.v5.0431,Tb11.v5.0456,Tb11.v5.0470,Tb11.v5.0484,Tb11.v5.0546,Tb11.v5.0576,Tb11.v5.0654,Tb11.v5.0784,Tb11.v5.0821,Tb11.v5.0830,Tb11.v5.0864,Tb11.v5.0865,Tb11.v5.1015,Tb11.v5.1016,Tb927.10.13040,Tb927.10.16000,Tb927.10.16190,Tb927.10.2430,Tb927.11.13740,…	2.11437	1.23266
Tb427_000820500.1-p1-CDS3	Tb427_000820500.1	unitig_3048_Tb427v10	Tb05.5K5.180	GRESAG 4 receptor-type adenylate cyclase	GRESAG	Adenylate and Guanylate cyclase catalytic domain containing protein	25	-0.0667	NA	0	0.91	44.38	355	87	48	68	8	9	10	2.53	1.72	1.92	0.91	1.16	1.42	Tb05.5K5.180,Tb05.5K5.190,Tb09.v4.0009,Tb11.v5.0209,Tb11.v5.0217,Tb11.v5.0281,Tb11.v5.0379,Tb11.v5.0380,Tb11.v5.0424,Tb11.v5.0425,Tb11.v5.0429,Tb11.v5.0431,Tb11.v5.0456,Tb11.v5.0470,Tb11.v5.0484,Tb11.v5.0546,Tb11.v5.0576,Tb11.v5.0654,Tb11.v5.0784,Tb11.v5.0821,Tb11.v5.0830,Tb11.v5.0864,Tb11.v5.0865,Tb11.v5.1015,Tb11.v5.1016,Tb927.10.13040,Tb927.10.16000,Tb927.10.16190,Tb927.10.2430,Tb927.11.13740,…	1.44361	1.23879
Tb427_000696500.1-p1-CDS3	Tb427_000696500.1	unitig_197_Tb427v10	Tb927.2.300	DNA-directed RNA polymerase, pseudogene	Pseudogene	RNA polymerase Rpb2, domain 4/RNA polymerase Rpb2, domain 6	23	-0.0805	NA	0	0.81	172.5	345	71	60	92	2	9	8	2.06	2.15	2.6	0.23	1.16	1.14	Tb927.2.300,Tb927.2.420,Tb927.2.460,Tb927.2.540,Tb927.4.230,Tb927.6.5190	1.51602	1.24489
Tb427_000742300.1-p1-CDS3	Tb427_000742300.1	unitig_2223_Tb427v10	Tb927.2.300	DNA-directed RNA polymerase, pseudogene	Pseudogene	RNA polymerase Rpb2, domain 4/RNA polymerase Rpb2, domain 6	22	-0.14	NA	0	0.69	30.36	334	66	46	56	11	4	10	1.92	1.65	1.58	1.25	0.52	1.42	Tb927.2.300,Tb927.2.420,Tb927.2.460,Tb927.2.540,Tb927.4.230,Tb927.6.5190	1.55582	1.24489
Tb427_000661700.1-p1-CDS12	Tb427_000661700.1	unitig_1863_Tb427v10	Tb09.v4.0013	retrotransposon hot spot (RHS) protein	RHS	Retrotransposon hot spot protein	29	0.0425	NA	0	1.24	96.5	579	87	66	76	6	15	11	2.53	2.37	2.15	0.68	1.93	1.57	Tb09.v4.0013,Tb09.v4.0067,Tb11.0820,Tb11.1780,Tb11.v5.0214,Tb11.v5.0294,Tb11.v5.0295,Tb11.v5.0325,Tb11.v5.0326,Tb11.v5.0353,Tb11.v5.0489,Tb11.v5.0532,Tb11.v5.0533,Tb11.v5.0594,Tb11.v5.0624,Tb11.v5.0670,Tb11.v5.0693,Tb11.v5.0839,Tb927.1.120,Tb927.1.180,Tb927.1.190,Tb927.1.220,Tb927.1.70,Tb927.1.90,Tb927.10.110,Tb927.10.70,Tb927.2.100,Tb927.2.1120,Tb927.2.1180,Tb927.2.1210,Tb927.2.270,Tb927.2.280,T…	1.62293	1.24489
Tb427_000652900.1-p1-CDS3	Tb427_000652900.1	unitig_1852_Tb427v10	Tb09.v4.0013	retrotransposon hot spot (RHS) protein	RHS	Retrotransposon hot spot protein	19	-0.2136	NA	0	0.52	22.89	206	51	49	64	9	6	5	1.48	1.76	1.81	1.02	0.77	0.71	Tb09.v4.0013,Tb09.v4.0067,Tb11.0820,Tb11.1780,Tb11.v5.0214,Tb11.v5.0294,Tb11.v5.0295,Tb11.v5.0325,Tb11.v5.0326,Tb11.v5.0353,Tb11.v5.0489,Tb11.v5.0532,Tb11.v5.0533,Tb11.v5.0594,Tb11.v5.0624,Tb11.v5.0670,Tb11.v5.0693,Tb11.v5.0839,Tb927.1.120,Tb927.1.180,Tb927.1.190,Tb927.1.220,Tb927.1.70,Tb927.1.90,Tb927.10.110,Tb927.10.70,Tb927.2.100,Tb927.2.1120,Tb927.2.1180,Tb927.2.1210,Tb927.2.270,Tb927.2.280,T…	1.63691	1.24489
Tb427_000729600.1-p1-CDS10	Tb427_000729600.1	unitig_2196_Tb427v10	Tb11.v5.1020	retrotransposon hot spot (RHS) protein	RHS	Reverse transcriptase (RNA-dependent DNA polymerase)	17	-0.2177	NA	0	0.44	7.55	83	44	39	56	11	3	6	1.28	1.4	1.58	1.25	0.39	0.85	Tb11.v5.1020,Tb927.1.240,Tb927.1.500,Tb927.10.16200,Tb927.11.18610,Tb927.11.18630	1.70044	1.24489
Tb427_000647600.1-p1-CDS1	Tb427_000647600.1	unitig_1841_Tb427v10	Tb09.v4.0013	retrotransposon hot spot (RHS) protein	RHS	Retrotransposon hot spot protein	21	-0.0418	NA	0	0.75	64.42	773	60	34	52	12	11	5	1.75	1.22	1.47	1.36	1.42	0.71	Tb09.v4.0013,Tb09.v4.0067,Tb11.0820,Tb11.1780,Tb11.v5.0214,Tb11.v5.0294,Tb11.v5.0295,Tb11.v5.0325,Tb11.v5.0326,Tb11.v5.0353,Tb11.v5.0489,Tb11.v5.0532,Tb11.v5.0533,Tb11.v5.0594,Tb11.v5.0624,Tb11.v5.0670,Tb11.v5.0693,Tb11.v5.0839,Tb927.1.120,Tb927.1.180,Tb927.1.190,Tb927.1.220,Tb927.1.70,Tb927.1.90,Tb927.10.110,Tb927.10.70,Tb927.2.100,Tb927.2.1120,Tb927.2.1180,Tb927.2.1210,Tb927.2.270,Tb927.2.280,T…	1.89142	1.24489
Tb427_000037800.1-p1-CDS1	Tb427_000037800.1	Chr10_3A_Tb427v10	Tb11.v5.1020	retrotransposon hot spot (RHS) protein	RHS	RNase H	24	0.1442	NA	0	1.12	38	456	52	41	52	12	8	15	1.51	1.47	1.47	1.36	1.03	2.13	Tb11.v5.1020,Tb927.1.240,Tb927.1.500,Tb927.10.16200,Tb927.11.18610,Tb927.11.18630	2.05658	1.24489
Tb427_000840000.1-p1-CDS5	Tb427_000840000.1	unitig_52_Tb427v10	Tb10.v4.0215	hypothetical protein	ZUnknown	hypothetical protein, conserved	26	-0.0234	NA	0	1	22.88	183	74	59	68	8	11	10	2.15	2.12	1.92	0.91	1.42	1.42	Tb10.v4.0215,Tb927.9.15820	1.46989	1.25701
Tb427_080058700.1-p1-CDS2	Tb427_080058700.1	Chr8_core_Tb427v10	Tb927.8.5340	hypothetical protein	ZUnknown	hypothetical protein, conserved	16	-0.1617	NA	0	0.43	1	8	31	34	68	8	5	4	0.9	1.22	1.92	0.91	0.64	0.57	Tb927.8.5340	1.53107	1.25701
Tb427_000712500.1-p1-CDS3	Tb427_000712500.1	unitig_2120_Tb427v10	Tb10.v4.0215	hypothetical protein	ZUnknown	hypothetical protein, conserved	28	-0.1189	NA	0	0.93	30	270	100	70	64	9	5	14	2.91	2.51	1.81	1.02	0.64	1.99	Tb10.v4.0215,Tb927.9.15820	1.64616	1.25701
Tb427_000802500.1-p1-CDS1	Tb427_000802500.1	unitig_2671_Tb427v10	Tb927.9.780	hypothetical protein	ZUnknown	hypothetical protein, conserved	27	-0.009	NA	0	1.06	24	240	81	59	60	10	11	11	2.36	2.12	1.69	1.14	1.42	1.57	Tb927.9.780	1.28096	1.26303
Tb427_000638100.1-p1-CDS2	Tb427_000638100.1	unitig_166_Tb427v10	Tb927.1.280	Protein of unknown function (DUF1181)	ZUnknown	Protein of unknown function (DUF1181)	19	-0.0598	NA	0	0.66	6	60	43	34	60	10	9	5	1.25	1.22	1.69	1.14	1.16	0.71	Tb927.1.280,Tb927.1.380,Tb927.1.470,Tb927.2.160,Tb927.2.680,Tb927.2.940,Tb927.4.150,Tb927.6.120,Tb927.7.7550	1.51602	1.26303
Tb427_070084000.1-p1-CDS1	Tb427_070084000.1	Chr7_core_Tb427v10	Tb09.v4.0041	leucine-rich repeat protein LRRP, pseudogene	LRRP	hypothetical protein, conserved	21	-0.1127	NA	0	0.66	10.62	138	70	34	48	13	8	6	2.04	1.22	1.36	1.48	1.03	0.85	Tb09.v4.0041,Tb11.v5.0448,Tb11.v5.0551,Tb11.v5.0560,Tb11.v5.0602,Tb11.v5.0703,Tb11.v5.0838,Tb927.1.290,Tb927.1.370,Tb927.1.480,Tb927.11.1500,Tb927.11.1510,Tb927.2.1310,Tb927.2.170,Tb927.2.690,Tb927.2.950,Tb927.3.1490,Tb927.4.160,Tb927.6.130,Tb927.7.7540,Tb927.9.14540	2.04614	1.26303
Tb427_030036900.1-p1-CDS1	Tb427_030036900.1	Chr3_core_Tb427v10	Tb11.v5.0317	hypothetical protein, conserved	ZUnknown	hypothetical protein, conserved	24	0.2191	NA	0	1.2	14.31	186	44	39	48	13	10	15	1.28	1.4	1.36	1.48	1.29	2.13	Tb11.v5.0317,Tb11.v5.0855,Tb927.1.350,Tb927.11.18020,Tb927.11.3560,Tb927.11.7980	2.58736	1.26303
Tb427_060005500.1-p1-CDS1	Tb427_060005500.1	Chr6_core_Tb427v10	Tb927.6.240	hypothetical protein, conserved	ZUnknown	hypothetical protein, conserved	25	-0.1856	NA	0	0.76	7	42	92	66	77	6	8	8	2.68	2.37	2.17	0.68	1.03	1.14	Tb927.6.240	1.10434	1.27501
Tb427_000288200.1-p1-CDS1	Tb427_000288200.1	Chr3_3A_Tb427v10	Tb09.v4.0152	hypothetical protein	ZUnknown	hypothetical protein, conserved	25	-0.0026	NA	0	1	23.29	163	69	54	73	7	11	10	2.01	1.94	2.06	0.79	1.42	1.42	Tb09.v4.0152,Tb927.11.17830,Tb927.9.760	1.1177	1.27501
Tb427_070075400.1-p1-CDS4	Tb427_070075400.1	Chr7_core_Tb427v10	Tb10.v4.0128	hypothetical protein	ZUnknown	hypothetical protein, conserved	23	-0.2684	NA	0	0.32	1349.43	9446	161	27	73	7	6	1	4.68	0.97	2.06	0.79	0.77	0.14	Tb10.v4.0128,Tb11.v5.0381,Tb927.11.19800	1.26303	1.27501
Tb427_000638300.1-p1-CDS2	Tb427_000638300.1	unitig_166_Tb427v10	Tb05.5K5.350	ESAG3 pseudogene	ESAG.pseudo	hypothetical protein, conserved	29	-0.1601	NA	0	0.9	18	90	120	78	81	5	10	9	3.49	2.8	2.29	0.57	1.29	1.28	Tb05.5K5.350,Tb05.5K5.420,Tb05.5K5.500,Tb08.27P2.160,Tb08.27P2.250,Tb08.27P2.330,Tb08.27P2.400,Tb08.27P2.520,Tb09.v4.0024,Tb09.v4.0027,Tb09.v4.0033,Tb09.v4.0045,Tb09.v4.0062,Tb09.v4.0083,Tb09.v4.0100,Tb09.v4.0115,Tb09.v4.0130,Tb09.v4.0132,Tb09.v4.0154,Tb09.v4.0160,Tb09.v4.0172,Tb09.v4.0181,Tb09.v4.0201,Tb09.v4.0206,Tb10.v4.0057,Tb10.v4.0066,Tb10.v4.0074,Tb10.v4.0090,Tb10.v4.0101,Tb10.v4.0137,Tb10…	1.26903	1.27501
Tb427_000640200.1-p1-CDS1	Tb427_000640200.1	unitig_166_Tb427v10	Tb927.1.275	ESAG4 pseudogene	ESAG.pseudo	hypothetical protein, conserved	24	-0.0856	NA	0	0.83	26.75	214	62	66	69	8	14	4	1.8	2.37	1.95	0.91	1.8	0.57	Tb927.1.275,Tb927.2.1260,Tb927.4.130,Tb927.6.100	1.28096	1.27501
Tb427_000673400.1-p1-CDS5	Tb427_000673400.1	unitig_1899_Tb427v10	Tb05.5K5.180	GRESAG 4 receptor-type adenylate cyclase	GRESAG	Adenylate and Guanylate cyclase catalytic domain containing protein	28	0.1597	NA	0	1.31	31.44	283	80	46	65	9	17	11	2.33	1.65	1.84	1.02	2.19	1.57	Tb05.5K5.180,Tb05.5K5.190,Tb09.v4.0009,Tb11.v5.0209,Tb11.v5.0217,Tb11.v5.0281,Tb11.v5.0379,Tb11.v5.0380,Tb11.v5.0424,Tb11.v5.0425,Tb11.v5.0429,Tb11.v5.0431,Tb11.v5.0456,Tb11.v5.0470,Tb11.v5.0484,Tb11.v5.0546,Tb11.v5.0576,Tb11.v5.0654,Tb11.v5.0784,Tb11.v5.0821,Tb11.v5.0830,Tb11.v5.0864,Tb11.v5.0865,Tb11.v5.1015,Tb11.v5.1016,Tb927.10.13040,Tb927.10.16000,Tb927.10.16190,Tb927.10.2430,Tb927.11.13740,…	1.28688	1.27501
Tb427_000348900.1-p1-CDS2	Tb427_000348900.1	Chr4_5B_Tb427v10	Tb927.1.410	retrotransposon hot spot protein (RHS, pseudogene)	RHS	Retrotransposon hot spot protein	24	-0.0979	NA	0	0.84	21.2	106	83	56	81	5	12	6	2.41	2.01	2.29	0.57	1.55	0.85	Tb927.1.410,Tb927.6.150	1.37851	1.27501
Tb427_000729600.1-p1-CDS6	Tb427_000729600.1	unitig_2196_Tb427v10	Tb11.v5.1020	retrotransposon hot spot (RHS) protein	RHS	Reverse transcriptase (RNA-dependent DNA polymerase)	25	0.2699	NA	0	1.34	16.33	147	40	40	65	9	11	17	1.16	1.44	1.84	1.02	1.42	2.42	Tb11.v5.1020,Tb927.1.240,Tb927.1.500,Tb927.10.16200,Tb927.11.18610,Tb927.11.18630	1.39506	1.27501
Tb427_000748400.1-p1-CDS1	Tb427_000748400.1	unitig_2246_Tb427v10	Tb11.1790	retrotransposon hot spot protein (RHS, pseudogene)	RHS	Retrotransposon hot spot protein	16	-0.2576	NA	0	0.32	30	300	39	38	61	10	6	1	1.13	1.36	1.72	1.14	0.77	0.14	Tb11.1790,Tb11.v5.0567,Tb11.v5.0713,Tb927.1.420,Tb927.2.1080,Tb927.2.1170,Tb927.2.240,Tb927.4.250,Tb927.6.140	1.41143	1.27501
Tb427_000674000.1-p1-CDS7	Tb427_000674000.1	unitig_1900_Tb427v10	Tb09.v4.0013	retrotransposon hot spot (RHS) protein	RHS	Retrotransposon hot spot protein	16	-0.3816	NA	0	0.2	12.91	142	51	34	57	11	1	3	1.48	1.22	1.61	1.25	0.13	0.43	Tb09.v4.0013,Tb09.v4.0067,Tb11.0820,Tb11.1780,Tb11.v5.0214,Tb11.v5.0294,Tb11.v5.0295,Tb11.v5.0325,Tb11.v5.0326,Tb11.v5.0353,Tb11.v5.0489,Tb11.v5.0532,Tb11.v5.0533,Tb11.v5.0594,Tb11.v5.0624,Tb11.v5.0670,Tb11.v5.0693,Tb11.v5.0839,Tb927.1.120,Tb927.1.180,Tb927.1.190,Tb927.1.220,Tb927.1.70,Tb927.1.90,Tb927.10.110,Tb927.10.70,Tb927.2.100,Tb927.2.1120,Tb927.2.1180,Tb927.2.1210,Tb927.2.270,Tb927.2.280,T…	1.45943	1.27501
Tb427_000673700.1-p1-CDS4	Tb427_000673700.1	unitig_1899_Tb427v10	Tb09.v4.0013	retrotransposon hot spot (RHS) protein	RHS	Retrotransposon hot spot protein	20	-0.1597	NA	0	0.61	14.55	160	57	45	57	11	8	5	1.66	1.62	1.61	1.25	1.03	0.71	Tb09.v4.0013,Tb09.v4.0067,Tb11.0820,Tb11.1780,Tb11.v5.0214,Tb11.v5.0294,Tb11.v5.0295,Tb11.v5.0325,Tb11.v5.0326,Tb11.v5.0353,Tb11.v5.0489,Tb11.v5.0532,Tb11.v5.0533,Tb11.v5.0594,Tb11.v5.0624,Tb11.v5.0670,Tb11.v5.0693,Tb11.v5.0839,Tb927.1.120,Tb927.1.180,Tb927.1.190,Tb927.1.220,Tb927.1.70,Tb927.1.90,Tb927.10.110,Tb927.10.70,Tb927.2.100,Tb927.2.1120,Tb927.2.1180,Tb927.2.1210,Tb927.2.270,Tb927.2.280,T…	1.46989	1.27501
Tb427_000241000.1-p1-CDS1	Tb427_000241000.1	Chr1_3A_Tb427v10	Tb11.v5.1020	retrotransposon hot spot (RHS) protein	RHS	Reverse transcriptase (RNA-dependent DNA polymerase)	24	0.0717	NA	0	0.99	16.57	232	62	40	45	14	11	10	1.8	1.44	1.27	1.59	1.42	1.42	Tb11.v5.1020,Tb927.1.240,Tb927.1.500,Tb927.10.16200,Tb927.11.18610,Tb927.11.18630	1.72683	1.27501
Tb427_000105400.1-p1-CDS1	Tb427_000105400.1	Chr10_3B_Tb427v10	Tb11.v5.1020	retrotransposon hot spot (RHS) protein	RHS	RNase H	30	0.2514	NA	0	1.5	30.07	421	66	57	45	14	20	12	1.92	2.05	1.27	1.59	2.58	1.71	Tb11.v5.1020,Tb927.1.240,Tb927.1.500,Tb927.10.16200,Tb927.11.18610,Tb927.11.18630	1.89142	1.27501
Tb427_000497900.1-p1-CDS1	Tb427_000497900.1	Chr8_3A_Tb427v10	Tb10.v4.0215	hypothetical protein	ZUnknown	hypothetical protein, conserved	28	0.0642	NA	0	1.17	10.3	103	67	68	61	10	15	10	1.95	2.44	1.72	1.14	1.93	1.42	Tb10.v4.0215,Tb927.9.15820	2.0635	1.27501
Tb427_000111400.1-p1-CDS1	Tb427_000111400.1	Chr11_3A_Tb427v10	Tb927.5.297b	hypothetical protein	ZUnknown	hypothetical protein, conserved	22	-0.0385	NA	0	0.81	2	20	54	45	61	10	8	9	1.57	1.62	1.72	1.14	1.03	1.28	Tb927.5.297b	2.07724	1.27501
Tb427_000221900.1-p1-CDS2	Tb427_000221900.1	Chr1_3A_Tb427v10	Tb10.v4.0215	hypothetical protein	ZUnknown	hypothetical protein, conserved	18	-0.3974	NA	0	0.29	11	121	65	48	57	11	2	4	1.89	1.72	1.61	1.25	0.26	0.57	Tb10.v4.0215,Tb927.9.15820	2.29278	1.27501
Tb427_000093400.1-p1-CDS1	Tb427_000093400.1	Chr10_3B_Tb427v10	Tb05.5K5.350	ESAG3 pseudogene	ESAG.pseudo	hypothetical protein	23	-0.1064	NA	0	0.79	89.89	809	73	51	66	9	11	6	2.12	1.83	1.86	1.02	1.42	0.85	Tb05.5K5.350,Tb05.5K5.420,Tb05.5K5.500,Tb08.27P2.160,Tb08.27P2.250,Tb08.27P2.330,Tb08.27P2.400,Tb08.27P2.520,Tb09.v4.0024,Tb09.v4.0027,Tb09.v4.0033,Tb09.v4.0045,Tb09.v4.0062,Tb09.v4.0083,Tb09.v4.0100,Tb09.v4.0115,Tb09.v4.0130,Tb09.v4.0132,Tb09.v4.0154,Tb09.v4.0160,Tb09.v4.0172,Tb09.v4.0181,Tb09.v4.0201,Tb09.v4.0206,Tb10.v4.0057,Tb10.v4.0066,Tb10.v4.0074,Tb10.v4.0090,Tb10.v4.0101,Tb10.v4.0137,Tb10…	2.40871	1.27501
Tb427_070075700.1-p1-CDS7	Tb427_070075700.1	Chr7_core_Tb427v10	Tb11.v5.1020	retrotransposon hot spot (RHS) protein	RHS	hypothetical protein, conserved	17	-0.0449	NA	0	0.56	9.92	119	24	27	54	12	8	4	0.7	0.97	1.52	1.36	1.03	0.57	Tb11.v5.1020,Tb927.1.240,Tb927.1.500,Tb927.10.16200,Tb927.11.18610,Tb927.11.18630	1.0072	1.28096
Tb427_000150400.1-p1-CDS1	Tb427_000150400.1	Chr11_3B_Tb427v10	Tb11.v5.1020	retrotransposon hot spot (RHS) protein	RHS	Endonuclease-reverse transcriptase	21	-0.003	NA	0	0.8	13.17	158	52	36	54	12	9	8	1.51	1.29	1.52	1.36	1.16	1.14	Tb11.v5.1020,Tb927.1.240,Tb927.1.500,Tb927.10.16200,Tb927.11.18610,Tb927.11.18630	1.5008	1.28096
Tb427_000744000.1-p1-CDS2	Tb427_000744000.1	unitig_2228_Tb427v10	Tb10.v4.0215	hypothetical protein	ZUnknown	hypothetical protein, conserved	22	-0.2931	NA	0	0.51	17.71	124	81	59	74	7	7	4	2.36	2.12	2.09	0.79	0.9	0.57	Tb10.v4.0215,Tb927.9.15820	1.58496	1.28096
Tb427_000817700.1-p1-CDS1	Tb427_000817700.1	unitig_302_Tb427v10	Tb927.1.490	hypothetical protein	ZUnknown	hypothetical protein, conserved	26	-0.0855	NA	0	0.91	36.57	256	76	67	74	7	6	13	2.21	2.41	2.09	0.79	0.77	1.85	Tb927.1.490,Tb927.4.180,Tb927.9.740	1.64155	1.28096
Tb427_000694800.1-p1-CDS3	Tb427_000694800.1	unitig_1973_Tb427v10	Tb927.9.780	hypothetical protein	ZUnknown	hypothetical protein, conserved	28	-0.0462	NA	0	1.04	25.33	228	87	67	66	9	10	12	2.53	2.41	1.86	1.02	1.29	1.71	Tb927.9.780	1.64616	1.28096
Tb427_000269700.1-p1-CDS2	Tb427_000269700.1	Chr1_5A_Tb427v10	Tb09.v4.0066	hypothetical protein	ZUnknown	hypothetical protein, conserved	29	0.0836	NA	0	1.29	70.83	425	71	72	78	6	21	7	2.06	2.59	2.2	0.68	2.71	1	Tb09.v4.0066,Tb927.1.110	1.68706	1.28096
Tb427_000790500.1-p1-CDS1	Tb427_000790500.1	unitig_2565_Tb427v10	Tb05.5K5.350	ESAG3 pseudogene	ESAG.pseudo	hypothetical protein, conserved	29	-0.0613	NA	0	1.04	35.45	390	89	74	58	11	10	12	2.59	2.66	1.64	1.25	1.29	1.71	Tb05.5K5.350,Tb05.5K5.420,Tb05.5K5.500,Tb08.27P2.160,Tb08.27P2.250,Tb08.27P2.330,Tb08.27P2.400,Tb08.27P2.520,Tb09.v4.0024,Tb09.v4.0027,Tb09.v4.0033,Tb09.v4.0045,Tb09.v4.0062,Tb09.v4.0083,Tb09.v4.0100,Tb09.v4.0115,Tb09.v4.0130,Tb09.v4.0132,Tb09.v4.0154,Tb09.v4.0160,Tb09.v4.0172,Tb09.v4.0181,Tb09.v4.0201,Tb09.v4.0206,Tb10.v4.0057,Tb10.v4.0066,Tb10.v4.0074,Tb10.v4.0090,Tb10.v4.0101,Tb10.v4.0137,Tb10…	1.69153	1.28096
Tb427_010018500.1-p1-CDS1	Tb427_010018500.1	Chr1_core_Tb427v10	Tb11.v5.1020	retrotransposon hot spot (RHS) protein	RHS	Reverse transcriptase (RNA-dependent DNA polymerase)/Zinc finger, C2H2 type	21	-0.145	NA	0	0.66	2.5	20	54	53	70	8	6	8	1.57	1.9	1.98	0.91	0.77	1.14	Tb11.v5.1020,Tb927.1.240,Tb927.1.500,Tb927.10.16200,Tb927.11.18610,Tb927.11.18630	1.76129	1.28096
Tb427_070024400.1-p1-CDS2	Tb427_070024400.1	Chr7_core_Tb427v10	Tb09.v4.0013	retrotransposon hot spot (RHS) protein	RHS	Retrotransposon hot spot protein	19	-0.0123	NA	0	0.69	26.73	294	41	28	58	11	10	5	1.19	1.01	1.64	1.25	1.29	0.71	Tb09.v4.0013,Tb09.v4.0067,Tb11.0820,Tb11.1780,Tb11.v5.0214,Tb11.v5.0294,Tb11.v5.0295,Tb11.v5.0325,Tb11.v5.0326,Tb11.v5.0353,Tb11.v5.0489,Tb11.v5.0532,Tb11.v5.0533,Tb11.v5.0594,Tb11.v5.0624,Tb11.v5.0670,Tb11.v5.0693,Tb11.v5.0839,Tb927.1.120,Tb927.1.180,Tb927.1.190,Tb927.1.220,Tb927.1.70,Tb927.1.90,Tb927.10.110,Tb927.10.70,Tb927.2.100,Tb927.2.1120,Tb927.2.1180,Tb927.2.1210,Tb927.2.270,Tb927.2.280,T…	1.90304	1.28096
Tb427_000632200.1-p1-CDS1	Tb427_000632200.1	Tb427VSG-417_unitig_Tb427v10	Tb05.5K5.330	VSG pseudogene,variant surface glycoprotein, point mutation	VSG	Trypanosome variant surface glycoprotein (A-type)/Trypanosome variant surface glycoprotein C-terminal domain containing protein	49	-0.2208	NA	0	0.33	3.62	47	272	255	50	13	4	3	7.91	9.16	1.41	1.48	0.52	0.43	Tb05.5K5.330,Tb08.27P2.340,Tb10.v4.0097,Tb11.1110,Tb11.v5.0132,Tb11.v5.0907,Tb927.11.17580,Tb927.11.18230,Tb927.11.18360,Tb927.5.4770,Tb927.5.4840	1.94486	1.28096
Tb427_000754900.1-p1-CDS2	Tb427_000754900.1	unitig_2332_Tb427v10	Tb10.v4.0215	hypothetical protein	ZUnknown	hypothetical protein, conserved	24	-0.0352	NA	0	0.91	17.25	138	81	42	70	8	6	13	2.36	1.51	1.98	0.91	0.77	1.85	Tb10.v4.0215,Tb927.9.15820	1.10434	1.28688
Tb427_000287000.1-p1-CDS1	Tb427_000287000.1	Chr3_3A_Tb427v10	Tb10.v4.0215	hypothetical protein	ZUnknown	hypothetical protein, conserved	22	-0.1774	NA	0	0.66	12	120	76	46	62	10	7	7	2.21	1.65	1.75	1.14	0.9	1	Tb10.v4.0215,Tb927.9.15820	1.15704	1.28688
Tb427_000650200.1-p1-CDS2	Tb427_000650200.1	unitig_1843_Tb427v10	Tb10.v4.0215	hypothetical protein	ZUnknown	hypothetical protein, conserved	25	-0.1442	NA	0	0.79	32.1	321	105	48	62	10	11	6	3.05	1.72	1.75	1.14	1.42	0.85	Tb10.v4.0215,Tb927.9.15820	1.32769	1.28688
Tb427_000273700.1-p1-CDS1	Tb427_000273700.1	Chr1_5A_Tb427v10	Tb927.1.280	Protein of unknown function (DUF1181)	ZUnknown	Protein of unknown function (DUF1181)	18	-0.1455	NA	0	0.51	9.2	92	43	33	62	10	7	4	1.25	1.18	1.75	1.14	0.9	0.57	Tb927.1.280,Tb927.1.380,Tb927.1.470,Tb927.2.160,Tb927.2.680,Tb927.2.940,Tb927.4.150,Tb927.6.120,Tb927.7.7550	1.39506	1.28688
Tb427_000827700.1-p1-CDS2	Tb427_000827700.1	unitig_3147_Tb427v10	Tb927.9.780	hypothetical protein	ZUnknown	hypothetical protein, conserved	22	-0.0194	NA	0	0.79	5.85	76	58	37	50	13	10	7	1.69	1.33	1.41	1.48	1.29	1	Tb927.9.780	1.58496	1.28688
Tb427_000164000.1-p1-CDS1	Tb427_000164000.1	Chr11_3B_Tb427v10	Tb11.v5.0655	trypanosome RHS family	ZUnknown	hypothetical protein, conserved	21	0.0313	NA	0	0.83	15.71	220	52	32	46	14	13	5	1.51	1.15	1.3	1.59	1.68	0.71	Tb11.v5.0655,Tb927.1.430,Tb927.1.450,Tb927.2.1140,Tb927.2.830,Tb927.4.110	1.67807	1.28688
Tb427_000320900.1-p1-CDS6	Tb427_000320900.1	Chr4_3A_Tb427v10	Tb05.5K5.350	ESAG3 pseudogene	ESAG.pseudo	hypothetical protein, conserved	27	0.0549	NA	0	1.16	99.86	699	58	74	75	7	14	11	1.69	2.66	2.12	0.79	1.8	1.57	Tb05.5K5.350,Tb05.5K5.420,Tb05.5K5.500,Tb08.27P2.160,Tb08.27P2.250,Tb08.27P2.330,Tb08.27P2.400,Tb08.27P2.520,Tb09.v4.0024,Tb09.v4.0027,Tb09.v4.0033,Tb09.v4.0045,Tb09.v4.0062,Tb09.v4.0083,Tb09.v4.0100,Tb09.v4.0115,Tb09.v4.0130,Tb09.v4.0132,Tb09.v4.0154,Tb09.v4.0160,Tb09.v4.0172,Tb09.v4.0181,Tb09.v4.0201,Tb09.v4.0206,Tb10.v4.0057,Tb10.v4.0066,Tb10.v4.0074,Tb10.v4.0090,Tb10.v4.0101,Tb10.v4.0137,Tb10…	1.73985	1.28688
Tb427_000544700.1-p1-CDS6	Tb427_000544700.1	Chr8_5B_Tb427v10	Tb05.5K5.180	GRESAG 4 receptor-type adenylate cyclase	GRESAG	Adenylate and Guanylate cyclase catalytic domain containing protein	21	-0.0509	NA	0	0.73	31	279	53	38	67	9	12	4	1.54	1.36	1.89	1.02	1.55	0.57	Tb05.5K5.180,Tb05.5K5.190,Tb09.v4.0009,Tb11.v5.0209,Tb11.v5.0217,Tb11.v5.0281,Tb11.v5.0379,Tb11.v5.0380,Tb11.v5.0424,Tb11.v5.0425,Tb11.v5.0429,Tb11.v5.0431,Tb11.v5.0456,Tb11.v5.0470,Tb11.v5.0484,Tb11.v5.0546,Tb11.v5.0576,Tb11.v5.0654,Tb11.v5.0784,Tb11.v5.0821,Tb11.v5.0830,Tb11.v5.0864,Tb11.v5.0865,Tb11.v5.1015,Tb11.v5.1016,Tb927.10.13040,Tb927.10.16000,Tb927.10.16190,Tb927.10.2430,Tb927.11.13740,…	1.88753	1.28688
Tb427_000762800.1-p1-CDS4	Tb427_000762800.1	unitig_2344_Tb427v10	Tb927.2.300	DNA-directed RNA polymerase, pseudogene	Pseudogene	RNA polymerase Rpb2, domain 4	22	-0.2605	NA	0	0.51	33.5	134	75	72	87	4	7	4	2.18	2.59	2.46	0.45	0.9	0.57	Tb927.2.300,Tb927.2.420,Tb927.2.460,Tb927.2.540,Tb927.4.230,Tb927.6.5190	2.22959	1.28688
Tb427_070075700.1-p1-CDS2	Tb427_070075700.1	Chr7_core_Tb427v10	Tb11.v5.1020	retrotransposon hot spot (RHS) protein	RHS	hypothetical protein, conserved	45	-0.2522	NA	0	0.99	12.38	99	237	168	71	8	9	12	6.89	6.03	2	0.91	1.16	1.71	Tb11.v5.1020,Tb927.1.240,Tb927.1.500,Tb927.10.16200,Tb927.11.18610,Tb927.11.18630	1.18269	1.29278
Tb427_070075700.1-p1-CDS12	Tb427_070075700.1	Chr7_core_Tb427v10	Tb11.v5.1020	retrotransposon hot spot (RHS) protein	RHS	hypothetical protein, conserved	22	-0.215	NA	0	0.59	16.22	146	65	60	67	9	10	3	1.89	2.15	1.89	1.02	1.29	0.43	Tb11.v5.1020,Tb927.1.240,Tb927.1.500,Tb927.10.16200,Tb927.11.18610,Tb927.11.18630	1.29866	1.29278
Tb427_000495900.1-p1-CDS6	Tb427_000495900.1	Chr8_3A_Tb427v10	Tb11.v5.0349	DNA-directed RNA polymerase II subunit 2	RNA.synthesis	RNA polymerase Rpb2, domain 6	22	-0.0607	NA	0	0.79	6.13	49	53	51	71	8	8	9	1.54	1.83	2	0.91	1.03	1.28	Tb11.v5.0349,Tb927.1.100,Tb927.2.1110,Tb927.2.1200,Tb927.2.490	1.42761	1.29278
Tb427_000807800.1-p1-CDS2	Tb427_000807800.1	unitig_2801_Tb427v10	Tb10.v4.0215	hypothetical protein	ZUnknown	hypothetical protein, conserved	26	-0.205	NA	0	0.75	25.33	152	104	68	79	6	8	8	3.02	2.44	2.23	0.68	1.03	1.14	Tb10.v4.0215,Tb927.9.15820	1.48543	1.29278
Tb427_000222300.1-p1-CDS1	Tb427_000222300.1	Chr1_3A_Tb427v10	Tb10.v4.0215	hypothetical protein	ZUnknown	hypothetical protein, conserved	33	-0.0199	NA	0	1.27	10.89	98	135	69	67	9	11	16	3.93	2.48	1.89	1.02	1.42	2.28	Tb10.v4.0215,Tb927.9.15820	1.60881	1.29278
Tb427_090010600.1-p1-CDS1	Tb427_090010600.1	Chr9_core_Tb427v10	Tb10.v4.0259	Endonuclease-reverse transcriptase	ZUnknown	hypothetical protein	16	0.0433	NA	0	0.68	1.08	13	22	14	55	12	12	3	0.64	0.5	1.55	1.36	1.55	0.43	Tb10.v4.0259	1.63691	1.29278
Tb427_000723400.1-p1-CDS1	Tb427_000723400.1	unitig_2169_Tb427v10	Tb927.1.275	ESAG4 pseudogene	ESAG.pseudo	hypothetical protein, conserved	20	-0.1808	NA	0	0.55	30.7	307	65	36	63	10	8	4	1.89	1.29	1.78	1.14	1.03	0.57	Tb927.1.275,Tb927.2.1260,Tb927.4.130,Tb927.6.100	1.65076	1.29278
Tb427_000734700.1-p1-CDS6	Tb427_000734700.1	unitig_2213_Tb427v10	Tb05.5K5.180	GRESAG 4 receptor-type adenylate cyclase	GRESAG	Adenylate and Guanylate cyclase catalytic domain containing protein	20	-0.2478	NA	0	0.47	12.54	163	50	56	51	13	4	6	1.45	2.01	1.44	1.48	0.52	0.85	Tb05.5K5.180,Tb05.5K5.190,Tb09.v4.0009,Tb11.v5.0209,Tb11.v5.0217,Tb11.v5.0281,Tb11.v5.0379,Tb11.v5.0380,Tb11.v5.0424,Tb11.v5.0425,Tb11.v5.0429,Tb11.v5.0431,Tb11.v5.0456,Tb11.v5.0470,Tb11.v5.0484,Tb11.v5.0546,Tb11.v5.0576,Tb11.v5.0654,Tb11.v5.0784,Tb11.v5.0821,Tb11.v5.0830,Tb11.v5.0864,Tb11.v5.0865,Tb11.v5.1015,Tb11.v5.1016,Tb927.10.13040,Tb927.10.16000,Tb927.10.16190,Tb927.10.2430,Tb927.11.13740,…	1.73985	1.29278
Tb427_000681200.1-p1-CDS1	Tb427_000681200.1	unitig_1910_Tb427v10	Tb927.2.300	DNA-directed RNA polymerase, pseudogene	Pseudogene	RNA polymerase Rpb2, domain 4	22	-0.2368	NA	0	0.57	8.15	106	71	57	51	13	4	8	2.06	2.05	1.44	1.48	0.52	1.14	Tb927.2.300,Tb927.2.420,Tb927.2.460,Tb927.2.540,Tb927.4.230,Tb927.6.5190	1.79909	1.29278
Tb427_080083600.1-p1-CDS1	Tb427_080083600.1	Chr8_core_Tb427v10	Tb11.v5.1020	retrotransposon hot spot (RHS) protein	RHS	hypothetical protein, conserved	21	-0.1328	NA	0	0.65	7.15	93	70	38	51	13	7	7	2.04	1.36	1.44	1.48	0.9	1	Tb11.v5.1020,Tb927.1.240,Tb927.1.500,Tb927.10.16200,Tb927.11.18610,Tb927.11.18630	2.08746	1.29278
Tb427_000260700.1-p1-CDS1	Tb427_000260700.1	Chr1_3B_Tb427v10	Tb11.v5.1020	retrotransposon hot spot (RHS) protein	RHS	RNase H	26	0.1227	NA	0	1.14	23.38	304	60	53	51	13	17	8	1.75	1.9	1.44	1.48	2.19	1.14	Tb11.v5.1020,Tb927.1.240,Tb927.1.500,Tb927.10.16200,Tb927.11.18610,Tb927.11.18630	2.28096	1.29278
Tb427_000269600.1-p1-CDS2	Tb427_000269600.1	Chr1_5A_Tb427v10	Tb927.2.300	DNA-directed RNA polymerase, pseudogene	Pseudogene	RNA polymerase Rpb2, domain 4/RNA polymerase Rpb2, domain 6	21	-0.1067	NA	0	0.69	39.38	315	56	45	72	8	7	8	1.63	1.62	2.03	0.91	0.9	1.14	Tb927.2.300,Tb927.2.420,Tb927.2.460,Tb927.2.540,Tb927.4.230,Tb927.6.5190	1.31615	1.30451
Tb427_000742100.1-p1-CDS4	Tb427_000742100.1	unitig_2222_Tb427v10	Tb927.2.300	DNA-directed RNA polymerase, pseudogene	Pseudogene	RNA polymerase Rpb2, domain 4/RNA polymerase Rpb2, domain 6	26	-0.1323	NA	0	0.84	36.11	325	79	71	68	9	6	12	2.3	2.55	1.92	1.02	0.77	1.71	Tb927.2.300,Tb927.2.420,Tb927.2.460,Tb927.2.540,Tb927.4.230,Tb927.6.5190	1.33342	1.30451
Tb427_070075700.1-p1-CDS3	Tb427_070075700.1	Chr7_core_Tb427v10	Tb11.v5.1020	retrotransposon hot spot (RHS) protein	RHS	hypothetical protein, conserved	20	-0.2015	NA	0	0.54	11.83	71	64	50	80	6	9	3	1.86	1.8	2.26	0.68	1.16	0.43	Tb11.v5.1020,Tb927.1.240,Tb927.1.500,Tb927.10.16200,Tb927.11.18610,Tb927.11.18630	1.33342	1.30451
Tb427_000288800.1-p1-CDS1	Tb427_000288800.1	Chr3_5A_Tb427v10	Tb11.v5.1020	retrotransposon hot spot (RHS) protein	RHS	RNase H	21	-0.0794	NA	0	0.7	36.64	403	53	40	60	11	6	9	1.54	1.44	1.69	1.25	0.77	1.28	Tb11.v5.1020,Tb927.1.240,Tb927.1.500,Tb927.10.16200,Tb927.11.18610,Tb927.11.18630	1.57531	1.30451
Tb427_000615300.1-p1-CDS1	Tb427_000615300.1	Chr9_3B_Tb427v10	Tb11.v5.1020	retrotransposon hot spot (RHS) protein	RHS	Reverse transcriptase (RNA-dependent DNA polymerase)/RNase H	24	0.1613	NA	0	1.11	23.73	261	53	39	60	11	13	11	1.54	1.4	1.69	1.25	1.68	1.57	Tb11.v5.1020,Tb927.1.240,Tb927.1.500,Tb927.10.16200,Tb927.11.18610,Tb927.11.18630	1.55582	1.31034
Tb427_000275100.1-p1-CDS1	Tb427_000275100.1	Chr1_5A_Tb427v10	Tb11.v5.1020	retrotransposon hot spot (RHS) protein	RHS	Retrotransposon hot spot protein	24	0.0886	NA	0	1.01	47.42	569	52	48	56	12	12	10	1.51	1.72	1.58	1.36	1.55	1.42	Tb11.v5.1020,Tb927.1.240,Tb927.1.500,Tb927.10.16200,Tb927.11.18610,Tb927.11.18630	1.8679	1.31034
Tb427_000728100.1-p1-CDS1	Tb427_000728100.1	unitig_2184_Tb427v10	Tb11.v5.1020	retrotransposon hot spot (RHS) protein	RHS	hypothetical protein	18	-0.1202	NA	0	0.5	2.93	44	44	28	44	15	6	5	1.28	1.01	1.24	1.7	0.77	0.71	Tb11.v5.1020,Tb927.1.240,Tb927.1.500,Tb927.10.16200,Tb927.11.18610,Tb927.11.18630	1.59932	1.31615
Tb427_000809700.1-p1-CDS1	Tb427_000809700.1	unitig_284_Tb427v10	Tb10.v4.0215	hypothetical protein	ZUnknown	hypothetical protein, conserved	25	-0.1195	NA	0	0.81	16.38	131	103	50	72	8	14	4	3	1.8	2.03	0.91	1.8	0.57	Tb10.v4.0215,Tb927.9.15820	1.67807	1.31615
Tb427_000740000.1-p1-CDS2	Tb427_000740000.1	unitig_2219_Tb427v10	Tb927.9.780	hypothetical protein	ZUnknown	hypothetical protein, conserved	25	-0.1587	NA	0	0.76	14.56	131	88	64	68	9	3	13	2.56	2.3	1.92	1.02	0.39	1.85	Tb927.9.780	2.3978	1.31615
Tb427_070071400.1-p1-CDS1	Tb427_070071400.1	Chr7_core_Tb427v10	Tb927.11.730	hypothetical protein	ZUnknown	hypothetical protein, conserved	23	-0.0062	NA	0	0.87	2.82	31	72	35	60	11	12	7	2.09	1.26	1.69	1.25	1.55	1	Tb927.11.730	1.66448	1.32769
Tb427_000784100.1-p1-CDS1	Tb427_000784100.1	unitig_2495_Tb427v10	Tb927.5.293b	hypothetical protein	ZUnknown	Protein of unknown function (DUF2974)	23	0.0578	NA	0	0.93	17.82	196	50	42	60	11	9	11	1.45	1.51	1.69	1.25	1.16	1.57	Tb927.5.293b	1.93357	1.32769
Tb427_000653000.1-p1-CDS3	Tb427_000653000.1	unitig_1852_Tb427v10	Tb927.1.400	hypothetical protein, conserved	ZUnknown	hypothetical protein, conserved	23	0.0116	NA	0	0.88	4	44	52	47	60	11	8	11	1.51	1.69	1.69	1.25	1.03	1.57	Tb927.1.400	1.08406	1.33914
Tb427_000270200.1-p1-CDS1	Tb427_000270200.1	Chr1_5A_Tb427v10	Tb10.v4.0215	hypothetical protein	ZUnknown	hypothetical protein, conserved	29	0.0326	NA	0	1.15	11.83	142	87	63	56	12	14	11	2.53	2.26	1.58	1.36	1.8	1.57	Tb10.v4.0215,Tb927.9.15820	1.37851	1.33914
Tb427_000544500.1-p1-CDS1	Tb427_000544500.1	Chr8_5B_Tb427v10	Tb927.1.400	hypothetical protein, conserved	ZUnknown	hypothetical protein, conserved	19	-0.0612	NA	0	0.61	6.27	94	36	34	44	15	5	8	1.05	1.22	1.24	1.7	0.64	1.14	Tb927.1.400	1.48543	1.33914
Tb427_000270100.1-p1-CDS2	Tb427_000270100.1	Chr1_5A_Tb427v10	Tb09.v4.0013	retrotransposon hot spot (RHS) protein	RHS	Retrotransposon hot spot protein	21	-0.174	NA	0	0.59	10.9	109	60	45	64	10	9	4	1.75	1.62	1.81	1.14	1.16	0.57	Tb09.v4.0013,Tb09.v4.0067,Tb11.0820,Tb11.1780,Tb11.v5.0214,Tb11.v5.0294,Tb11.v5.0295,Tb11.v5.0325,Tb11.v5.0326,Tb11.v5.0353,Tb11.v5.0489,Tb11.v5.0532,Tb11.v5.0533,Tb11.v5.0594,Tb11.v5.0624,Tb11.v5.0670,Tb11.v5.0693,Tb11.v5.0839,Tb927.1.120,Tb927.1.180,Tb927.1.190,Tb927.1.220,Tb927.1.70,Tb927.1.90,Tb927.10.110,Tb927.10.70,Tb927.2.100,Tb927.2.1120,Tb927.2.1180,Tb927.2.1210,Tb927.2.270,Tb927.2.280,T…	1.57046	1.33914
Tb427_000644000.1-p1-CDS1	Tb427_000644000.1	unitig_182_Tb427v10	Tb11.v5.1020	retrotransposon hot spot (RHS) protein	RHS	hypothetical protein, conserved	27	0.1308	NA	0	1.19	30.4	304	62	56	64	10	15	11	1.8	2.01	1.81	1.14	1.93	1.57	Tb11.v5.1020,Tb927.1.240,Tb927.1.500,Tb927.10.16200,Tb927.11.18610,Tb927.11.18630	1.96347	1.33914
Tb427_000366300.1-p1-CDS1	Tb427_000366300.1	Chr5_3A_Tb427v10	Tb11.v5.1020	retrotransposon hot spot (RHS) protein	RHS	Endonuclease-reverse transcriptase/Reverse transcriptase (RNA-dependent DNA polymerase)	29	0.2255	NA	0	1.38	25.08	326	65	56	52	13	14	16	1.89	2.01	1.47	1.48	1.8	2.28	Tb11.v5.1020,Tb927.1.240,Tb927.1.500,Tb927.10.16200,Tb927.11.18610,Tb927.11.18630	1.15704	1.3505
Tb427_000734200.1-p1-CDS1	Tb427_000734200.1	unitig_2213_Tb427v10	Tb11.v5.1020	retrotransposon hot spot (RHS) protein	RHS	Reverse transcriptase (RNA-dependent DNA polymerase)	25	0.1638	NA	0	1.1	19.07	267	55	38	48	14	13	11	1.6	1.36	1.36	1.59	1.68	1.57	Tb11.v5.1020,Tb927.1.240,Tb927.1.500,Tb927.10.16200,Tb927.11.18610,Tb927.11.18630	1.20789	1.3505
Tb427_030025700.1-p1-CDS1	Tb427_030025700.1	Chr3_core_Tb427v10	Tb927.3.2550	hypothetical protein, conserved	ZUnknown	hypothetical protein, conserved	22	0.1139	NA	0	0.96	11.1	111	41	35	64	10	13	8	1.19	1.26	1.81	1.14	1.68	1.14	Tb927.3.2550,Tb927.3.2560,Tb927.3.2570	1.38405	1.3505
Tb427_000630700.1-p1-CDS1	Tb427_000630700.1	Tb427VSG-2061_unitig_Tb427v10	Tb10.v4.0215	hypothetical protein	ZUnknown	hypothetical protein, conserved	22	-0.1567	NA	0	0.64	10.31	134	60	52	52	13	8	6	1.75	1.87	1.47	1.48	1.03	0.85	Tb10.v4.0215,Tb927.9.15820	1.41143	1.3505
Tb427_000500300.1-p1-CDS2	Tb427_000500300.1	Chr8_3B_Tb427v10	Tb927.7.3250	ESAG6, transferrin receptor	ESAG	Trypanosome variant surface glycoprotein (A-type)	18	0.05	NA	0	0.74	193.57	1355	23	22	77	7	6	10	0.67	0.79	2.17	0.79	0.77	1.42	Tb927.7.3250,Tb927.7.3260	1.55582	1.3505
Tb427_000830800.1-p1-CDS1	Tb427_000830800.1	unitig_317_Tb427v10	Tb10.v4.0215	hypothetical protein	ZUnknown	hypothetical protein, conserved	20	-0.3888	NA	0	0.32	18.71	131	78	52	77	7	4	3	2.27	1.87	2.17	0.79	0.52	0.43	Tb10.v4.0215,Tb927.9.15820	1.87971	1.3505
Tb427_000825700.1-p1-CDS2	Tb427_000825700.1	unitig_309_Tb427v10	Tb05.5K5.350	ESAG3 pseudogene	ESAG.pseudo	hypothetical protein, conserved	21	-0.1667	NA	0	0.59	6	84	63	44	49	14	7	6	1.83	1.58	1.38	1.59	0.9	0.85	Tb05.5K5.350,Tb05.5K5.420,Tb05.5K5.500,Tb08.27P2.160,Tb08.27P2.250,Tb08.27P2.330,Tb08.27P2.400,Tb08.27P2.520,Tb09.v4.0024,Tb09.v4.0027,Tb09.v4.0033,Tb09.v4.0045,Tb09.v4.0062,Tb09.v4.0083,Tb09.v4.0100,Tb09.v4.0115,Tb09.v4.0130,Tb09.v4.0132,Tb09.v4.0154,Tb09.v4.0160,Tb09.v4.0172,Tb09.v4.0181,Tb09.v4.0201,Tb09.v4.0206,Tb10.v4.0057,Tb10.v4.0066,Tb10.v4.0074,Tb10.v4.0090,Tb10.v4.0101,Tb10.v4.0137,Tb10…	1.94486	1.3505
Tb427_000754500.1-p1-CDS4	Tb427_000754500.1	unitig_2332_Tb427v10	Tb05.5K5.180	GRESAG 4 receptor-type adenylate cyclase	GRESAG	Adenylate and Guanylate cyclase catalytic domain containing protein	27	0.1165	NA	0	1.2	31.78	286	62	59	69	9	10	16	1.8	2.12	1.95	1.02	1.29	2.28	Tb05.5K5.180,Tb05.5K5.190,Tb09.v4.0009,Tb11.v5.0209,Tb11.v5.0217,Tb11.v5.0281,Tb11.v5.0379,Tb11.v5.0380,Tb11.v5.0424,Tb11.v5.0425,Tb11.v5.0429,Tb11.v5.0431,Tb11.v5.0456,Tb11.v5.0470,Tb11.v5.0484,Tb11.v5.0546,Tb11.v5.0576,Tb11.v5.0654,Tb11.v5.0784,Tb11.v5.0821,Tb11.v5.0830,Tb11.v5.0864,Tb11.v5.0865,Tb11.v5.1015,Tb11.v5.1016,Tb927.10.13040,Tb927.10.16000,Tb927.10.16190,Tb927.10.2430,Tb927.11.13740,…	1.9782	1.3505
Tb427_000726100.1-p1-CDS1	Tb427_000726100.1	unitig_2174_Tb427v10	Tb11.v5.1020	retrotransposon hot spot (RHS) protein	RHS	hypothetical protein, conserved	23	0.0796	NA	0	0.96	37.38	299	48	39	73	8	11	10	1.4	1.4	2.06	0.91	1.42	1.42	Tb11.v5.1020,Tb927.1.240,Tb927.1.500,Tb927.10.16200,Tb927.11.18610,Tb927.11.18630	2.01792	1.3505
Tb427_070024300.1-p1-CDS2	Tb427_070024300.1	Chr7_core_Tb427v10	Tb09.v4.0013	retrotransposon hot spot (RHS) protein	RHS	Retrotransposon hot spot protein	22	0.0904	NA	0	0.92	23.43	328	41	39	49	14	9	11	1.19	1.4	1.38	1.59	1.16	1.57	Tb09.v4.0013,Tb09.v4.0067,Tb11.0820,Tb11.1780,Tb11.v5.0214,Tb11.v5.0294,Tb11.v5.0295,Tb11.v5.0325,Tb11.v5.0326,Tb11.v5.0353,Tb11.v5.0489,Tb11.v5.0532,Tb11.v5.0533,Tb11.v5.0594,Tb11.v5.0624,Tb11.v5.0670,Tb11.v5.0693,Tb11.v5.0839,Tb927.1.120,Tb927.1.180,Tb927.1.190,Tb927.1.220,Tb927.1.70,Tb927.1.90,Tb927.10.110,Tb927.10.70,Tb927.2.100,Tb927.2.1120,Tb927.2.1180,Tb927.2.1210,Tb927.2.270,Tb927.2.280,T…	2.14078	1.3505
Tb427_000120400.1-p1-CDS1	Tb427_000120400.1	Chr11_3A_Tb427v10	Tb11.v5.1020	retrotransposon hot spot (RHS) protein	RHS	Reverse transcriptase (RNA-dependent DNA polymerase)/RNase H	22	0.0626	NA	0	0.85	21.14	296	49	30	49	14	13	6	1.43	1.08	1.38	1.59	1.68	0.85	Tb11.v5.1020,Tb927.1.240,Tb927.1.500,Tb927.10.16200,Tb927.11.18610,Tb927.11.18630	1.10434	1.35614
Tb427_000670500.1-p1-CDS1	Tb427_000670500.1	unitig_1891_Tb427v10	Tb09.v4.0013	retrotransposon hot spot (RHS) protein	RHS	Retrotransposon hot spot protein	20	0.1176	NA	0	0.87	13.07	196	29	23	45	15	10	9	0.84	0.83	1.27	1.7	1.29	1.28	Tb09.v4.0013,Tb09.v4.0067,Tb11.0820,Tb11.1780,Tb11.v5.0214,Tb11.v5.0294,Tb11.v5.0295,Tb11.v5.0325,Tb11.v5.0326,Tb11.v5.0353,Tb11.v5.0489,Tb11.v5.0532,Tb11.v5.0533,Tb11.v5.0594,Tb11.v5.0624,Tb11.v5.0670,Tb11.v5.0693,Tb11.v5.0839,Tb927.1.120,Tb927.1.180,Tb927.1.190,Tb927.1.220,Tb927.1.70,Tb927.1.90,Tb927.10.110,Tb927.10.70,Tb927.2.100,Tb927.2.1120,Tb927.2.1180,Tb927.2.1210,Tb927.2.270,Tb927.2.280,T…	1.24489	1.35614
Tb427_000781000.1-p1-CDS1	Tb427_000781000.1	unitig_2489_Tb427v10	Tb927.1.490	hypothetical protein	ZUnknown	hypothetical protein, conserved	29	-0.1232	NA	0	0.96	39.17	235	112	75	81	6	11	10	3.26	2.69	2.29	0.68	1.42	1.42	Tb927.1.490,Tb927.4.180,Tb927.9.740	1.24489	1.35614
Tb427_000827100.1-p1-CDS2	Tb427_000827100.1	unitig_313_Tb427v10	Tb10.v4.0215	hypothetical protein	ZUnknown	hypothetical protein, conserved	22	-0.4223	NA	0	0.33	9.5	76	102	60	73	8	2	5	2.97	2.15	2.06	0.91	0.26	0.71	Tb10.v4.0215,Tb927.9.15820	1.29866	1.35614
Tb427_000688500.1-p1-CDS2	Tb427_000688500.1	unitig_1928_Tb427v10	Tb927.2.300	DNA-directed RNA polymerase, pseudogene	Pseudogene	RNA polymerase Rpb2, domain 4	27	-0.0968	NA	0	0.91	16.7	167	89	63	65	10	11	9	2.59	2.26	1.84	1.14	1.42	1.28	Tb927.2.300,Tb927.2.420,Tb927.2.460,Tb927.2.540,Tb927.4.230,Tb927.6.5190	1.37851	1.35614
Tb427_000652800.1-p1-CDS1	Tb427_000652800.1	unitig_1852_Tb427v10	Tb09.v4.0013	retrotransposon hot spot (RHS) protein	RHS	Retrotransposon hot spot protein	23	-0.0034	NA	0	0.83	60.23	783	50	46	53	13	7	11	1.45	1.65	1.5	1.48	0.9	1.57	Tb09.v4.0013,Tb09.v4.0067,Tb11.0820,Tb11.1780,Tb11.v5.0214,Tb11.v5.0294,Tb11.v5.0295,Tb11.v5.0325,Tb11.v5.0326,Tb11.v5.0353,Tb11.v5.0489,Tb11.v5.0532,Tb11.v5.0533,Tb11.v5.0594,Tb11.v5.0624,Tb11.v5.0670,Tb11.v5.0693,Tb11.v5.0839,Tb927.1.120,Tb927.1.180,Tb927.1.190,Tb927.1.220,Tb927.1.70,Tb927.1.90,Tb927.10.110,Tb927.10.70,Tb927.2.100,Tb927.2.1120,Tb927.2.1180,Tb927.2.1210,Tb927.2.270,Tb927.2.280,T…	1.7137	1.35614
Tb427_000691000.1-p1-CDS4	Tb427_000691000.1	unitig_1960_Tb427v10	Tb10.v4.0215	hypothetical protein	ZUnknown	hypothetical protein, conserved	27	-0.0483	NA	0	0.95	27.1	271	86	56	65	10	11	10	2.5	2.01	1.84	1.14	1.42	1.42	Tb10.v4.0215,Tb927.9.15820	1.77821	1.35614
Tb427_000319800.1-p1-CDS7	Tb427_000319800.1	Chr4_3A_Tb427v10	Tb05.5K5.350	ESAG3 pseudogene	ESAG.pseudo	hypothetical protein	25	-0.0238	NA	0	0.93	89.5	537	56	70	82	6	15	6	1.63	2.51	2.31	0.68	1.93	0.85	Tb05.5K5.350,Tb05.5K5.420,Tb05.5K5.500,Tb08.27P2.160,Tb08.27P2.250,Tb08.27P2.330,Tb08.27P2.400,Tb08.27P2.520,Tb09.v4.0024,Tb09.v4.0027,Tb09.v4.0033,Tb09.v4.0045,Tb09.v4.0062,Tb09.v4.0083,Tb09.v4.0100,Tb09.v4.0115,Tb09.v4.0130,Tb09.v4.0132,Tb09.v4.0154,Tb09.v4.0160,Tb09.v4.0172,Tb09.v4.0181,Tb09.v4.0201,Tb09.v4.0206,Tb10.v4.0057,Tb10.v4.0066,Tb10.v4.0074,Tb10.v4.0090,Tb10.v4.0101,Tb10.v4.0137,Tb10…	1.84398	1.35614
Tb427_000320900.1-p1-CDS5	Tb427_000320900.1	Chr4_3A_Tb427v10	Tb05.5K5.350	ESAG3 pseudogene	ESAG.pseudo	hypothetical protein, conserved	29	0.0737	NA	0	1.21	126.86	888	62	77	78	7	16	11	1.8	2.76	2.2	0.79	2.06	1.57	Tb05.5K5.350,Tb05.5K5.420,Tb05.5K5.500,Tb08.27P2.160,Tb08.27P2.250,Tb08.27P2.330,Tb08.27P2.400,Tb08.27P2.520,Tb09.v4.0024,Tb09.v4.0027,Tb09.v4.0033,Tb09.v4.0045,Tb09.v4.0062,Tb09.v4.0083,Tb09.v4.0100,Tb09.v4.0115,Tb09.v4.0130,Tb09.v4.0132,Tb09.v4.0154,Tb09.v4.0160,Tb09.v4.0172,Tb09.v4.0181,Tb09.v4.0201,Tb09.v4.0206,Tb10.v4.0057,Tb10.v4.0066,Tb10.v4.0074,Tb10.v4.0090,Tb10.v4.0101,Tb10.v4.0137,Tb10…	1.94486	1.35614
Tb427_000811800.1-p1-CDS2	Tb427_000811800.1	unitig_2963_Tb427v10	Tb05.5K5.350	ESAG3 pseudogene	ESAG.pseudo	hypothetical protein, conserved	19	-0.3572	NA	0	0.33	26.2	262	61	51	66	10	1	6	1.77	1.83	1.86	1.14	0.13	0.85	Tb05.5K5.350,Tb05.5K5.420,Tb05.5K5.500,Tb08.27P2.160,Tb08.27P2.250,Tb08.27P2.330,Tb08.27P2.400,Tb08.27P2.520,Tb09.v4.0024,Tb09.v4.0027,Tb09.v4.0033,Tb09.v4.0045,Tb09.v4.0062,Tb09.v4.0083,Tb09.v4.0100,Tb09.v4.0115,Tb09.v4.0130,Tb09.v4.0132,Tb09.v4.0154,Tb09.v4.0160,Tb09.v4.0172,Tb09.v4.0181,Tb09.v4.0201,Tb09.v4.0206,Tb10.v4.0057,Tb10.v4.0066,Tb10.v4.0074,Tb10.v4.0090,Tb10.v4.0101,Tb10.v4.0137,Tb10…	1.96347	1.35614
Tb427_000792400.1-p1-CDS2	Tb427_000792400.1	unitig_2569_Tb427v10	Tb05.5K5.350	ESAG3 pseudogene	ESAG.pseudo	hypothetical protein, conserved	28	-0.1762	NA	0	0.81	7.5	90	107	67	58	12	10	8	3.11	2.41	1.64	1.36	1.29	1.14	Tb05.5K5.350,Tb05.5K5.420,Tb05.5K5.500,Tb08.27P2.160,Tb08.27P2.250,Tb08.27P2.330,Tb08.27P2.400,Tb08.27P2.520,Tb09.v4.0024,Tb09.v4.0027,Tb09.v4.0033,Tb09.v4.0045,Tb09.v4.0062,Tb09.v4.0083,Tb09.v4.0100,Tb09.v4.0115,Tb09.v4.0130,Tb09.v4.0132,Tb09.v4.0154,Tb09.v4.0160,Tb09.v4.0172,Tb09.v4.0181,Tb09.v4.0201,Tb09.v4.0206,Tb10.v4.0057,Tb10.v4.0066,Tb10.v4.0074,Tb10.v4.0090,Tb10.v4.0101,Tb10.v4.0137,Tb10…	1.99639	1.35614
Tb427_000734700.1-p1-CDS3	Tb427_000734700.1	unitig_2213_Tb427v10	Tb05.5K5.180	GRESAG 4 receptor-type adenylate cyclase	GRESAG	Adenylate and Guanylate cyclase catalytic domain containing protein	23	-0.0877	NA	0	0.77	19.25	231	72	45	58	12	8	9	2.09	1.62	1.64	1.36	1.03	1.28	Tb05.5K5.180,Tb05.5K5.190,Tb09.v4.0009,Tb11.v5.0209,Tb11.v5.0217,Tb11.v5.0281,Tb11.v5.0379,Tb11.v5.0380,Tb11.v5.0424,Tb11.v5.0425,Tb11.v5.0429,Tb11.v5.0431,Tb11.v5.0456,Tb11.v5.0470,Tb11.v5.0484,Tb11.v5.0546,Tb11.v5.0576,Tb11.v5.0654,Tb11.v5.0784,Tb11.v5.0821,Tb11.v5.0830,Tb11.v5.0864,Tb11.v5.0865,Tb11.v5.1015,Tb11.v5.1016,Tb927.10.13040,Tb927.10.16000,Tb927.10.16190,Tb927.10.2430,Tb927.11.13740,…	2.13093	1.35614
Tb427_000712200.1-p1-CDS5	Tb427_000712200.1	unitig_2120_Tb427v10	Tb927.2.300	DNA-directed RNA polymerase, pseudogene	Pseudogene	RNA polymerase Rpb2, domain 4/RNA polymerase Rpb2, domain 6	24	-0.1568	NA	0	0.73	35	280	89	49	74	8	7	9	2.59	1.76	2.09	0.91	0.9	1.28	Tb927.2.300,Tb927.2.420,Tb927.2.460,Tb927.2.540,Tb927.4.230,Tb927.6.5190	1.02148	1.36177
Tb427_000701500.1-p1-CDS3	Tb427_000701500.1	unitig_2016_Tb427v10	Tb09.v4.0013	retrotransposon hot spot (RHS) protein	RHS	Retrotransposon hot spot protein	23	-0.1249	NA	0	0.72	24.88	199	71	47	74	8	9	7	2.06	1.69	2.09	0.91	1.16	1	Tb09.v4.0013,Tb09.v4.0067,Tb11.0820,Tb11.1780,Tb11.v5.0214,Tb11.v5.0294,Tb11.v5.0295,Tb11.v5.0325,Tb11.v5.0326,Tb11.v5.0353,Tb11.v5.0489,Tb11.v5.0532,Tb11.v5.0533,Tb11.v5.0594,Tb11.v5.0624,Tb11.v5.0670,Tb11.v5.0693,Tb11.v5.0839,Tb927.1.120,Tb927.1.180,Tb927.1.190,Tb927.1.220,Tb927.1.70,Tb927.1.90,Tb927.10.110,Tb927.10.70,Tb927.2.100,Tb927.2.1120,Tb927.2.1180,Tb927.2.1210,Tb927.2.270,Tb927.2.280,T…	1.26303	1.36177
Tb427_000771900.1-p1-CDS5	Tb427_000771900.1	unitig_2456_Tb427v10	Tb11.v5.1020	retrotransposon hot spot (RHS) protein	RHS	Reverse transcriptase (RNA-dependent DNA polymerase)	23	0.1546	NA	0	1.03	11.9	119	49	27	66	10	14	9	1.43	0.97	1.86	1.14	1.8	1.28	Tb11.v5.1020,Tb927.1.240,Tb927.1.500,Tb927.10.16200,Tb927.11.18610,Tb927.11.18630	1.31615	1.36177
Tb427_000681300.1-p1-CDS4	Tb427_000681300.1	unitig_1910_Tb427v10	Tb09.v4.0013	retrotransposon hot spot (RHS) protein	RHS	Retrotransposon hot spot protein	19	-0.1998	NA	0	0.49	7.58	91	51	41	58	12	6	5	1.48	1.47	1.64	1.36	0.77	0.71	Tb09.v4.0013,Tb09.v4.0067,Tb11.0820,Tb11.1780,Tb11.v5.0214,Tb11.v5.0294,Tb11.v5.0295,Tb11.v5.0325,Tb11.v5.0326,Tb11.v5.0353,Tb11.v5.0489,Tb11.v5.0532,Tb11.v5.0533,Tb11.v5.0594,Tb11.v5.0624,Tb11.v5.0670,Tb11.v5.0693,Tb11.v5.0839,Tb927.1.120,Tb927.1.180,Tb927.1.190,Tb927.1.220,Tb927.1.70,Tb927.1.90,Tb927.10.110,Tb927.10.70,Tb927.2.100,Tb927.2.1120,Tb927.2.1180,Tb927.2.1210,Tb927.2.270,Tb927.2.280,T…	1.42761	1.36177
Tb427_000812700.1-p1-CDS2	Tb427_000812700.1	unitig_2977_Tb427v10	Tb11.v5.1020	retrotransposon hot spot (RHS) protein	RHS	Reverse transcriptase (RNA-dependent DNA polymerase)	24	0.0264	NA	0	0.91	3.92	47	47	54	58	12	8	12	1.37	1.94	1.64	1.36	1.03	1.71	Tb11.v5.1020,Tb927.1.240,Tb927.1.500,Tb927.10.16200,Tb927.11.18610,Tb927.11.18630	1.48543	1.36177
Tb427_000462700.1-p1-CDS1	Tb427_000462700.1	Chr7_5A_Tb427v10	Tb11.v5.1020	retrotransposon hot spot (RHS) protein	RHS	hypothetical protein, conserved	24	0.087	NA	0	0.95	19.36	271	54	38	50	14	11	10	1.57	1.36	1.41	1.59	1.42	1.42	Tb11.v5.1020,Tb927.1.240,Tb927.1.500,Tb927.10.16200,Tb927.11.18610,Tb927.11.18630	1.51602	1.36177
Tb427_000693100.1-p1-CDS1	Tb427_000693100.1	unitig_1969_Tb427v10	Tb927.1.490	hypothetical protein	ZUnknown	hypothetical protein, conserved	18	-0.3408	NA	0	0.32	35.75	286	61	45	74	8	2	5	1.77	1.62	2.09	0.91	0.26	0.71	Tb927.1.490,Tb927.4.180,Tb927.9.740	1.57046	1.36177
Tb427_000696000.1-p1-CDS2	Tb427_000696000.1	unitig_1976_Tb427v10	Tb927.1.270	hypothetical protein	ZUnknown	hypothetical protein, conserved	25	0.0048	NA	0	0.95	33.11	298	66	51	70	9	11	10	1.92	1.83	1.98	1.02	1.42	1.42	Tb927.1.270,Tb927.2.1250,Tb927.2.650,Tb927.2.900,Tb927.4.120	1.62293	1.36177
Tb427_080064600.1-p1-CDS1	Tb427_080064600.1	Chr8_core_Tb427v10	Tb927.8.5920	hypothetical protein	ZUnknown	hypothetical protein, conserved	26	-0.037	NA	0	0.95	1	9	83	53	70	9	10	11	2.41	1.9	1.98	1.02	1.29	1.57	Tb927.8.5920	1.65076	1.36177
Tb427_030025500.1-p1-CDS1	Tb427_030025500.1	Chr3_core_Tb427v10	Tb927.3.2550	hypothetical protein, conserved	ZUnknown	hypothetical protein, conserved	21	0.0304	NA	0	0.81	10.09	111	44	36	62	11	9	9	1.28	1.29	1.75	1.25	1.16	1.28	Tb927.3.2550,Tb927.3.2560,Tb927.3.2570	1.77821	1.36177
Tb427_000695700.1-p1-CDS3	Tb427_000695700.1	unitig_1976_Tb427v10	Tb10.v4.0215	hypothetical protein	ZUnknown	hypothetical protein, conserved	23	-0.155	NA	0	0.68	15	195	67	54	54	13	8	7	1.95	1.94	1.52	1.48	1.03	1	Tb10.v4.0215,Tb927.9.15820	1.95233	1.36177
Tb427_000791200.1-p1-CDS5	Tb427_000791200.1	unitig_2565_Tb427v10	Tb10.v4.0215	hypothetical protein	ZUnknown	hypothetical protein, conserved	24	-0.1443	NA	0	0.71	13.92	181	75	54	54	13	10	6	2.18	1.94	1.52	1.48	1.29	0.85	Tb10.v4.0215,Tb927.9.15820	2.19535	1.36177
Tb427_000485100.1-p1-CDS1	Tb427_000485100.1	Chr8_3A_Tb427v10	Tb927.1.490	hypothetical protein	ZUnknown	hypothetical protein	20	-0.1261	NA	0	0.59	20.07	281	48	43	50	14	5	8	1.4	1.54	1.41	1.59	0.64	1.14	Tb927.1.490,Tb927.4.180,Tb927.9.740	2.34767	1.36177
Tb427_000724000.1-p1-CDS1	Tb427_000724000.1	unitig_2170_Tb427v10	Tb927.1.275	ESAG4 pseudogene	ESAG.pseudo	hypothetical protein, conserved	24	0.0597	NA	0	0.98	40.57	284	55	46	79	7	12	10	1.6	1.65	2.23	0.79	1.55	1.42	Tb927.1.275,Tb927.2.1260,Tb927.4.130,Tb927.6.100	2.49313	1.36177
Tb427_000601200.1-p1-CDS2	Tb427_000601200.1	Chr9_3B_Tb427v10	Tb927.9.16040	leucine-rich repeat protein LRRP, pseudogene	LRRP	hypothetical protein, conserved	19	-0.2489	NA	0	0.42	2.89	26	58	38	71	9	2	7	1.69	1.36	2	1.02	0.26	1	Tb927.9.16040	1.10434	1.36737
Tb427_000682000.1-p1-CDS3	Tb427_000682000.1	unitig_1911_Tb427v10	Tb927.2.300	DNA-directed RNA polymerase, pseudogene	Pseudogene	RNA polymerase Rpb2, domain 4/RNA polymerase Rpb2, domain 6	21	-0.3118	NA	0	0.44	32.22	290	71	52	71	9	6	4	2.06	1.87	2	1.02	0.77	0.57	Tb927.2.300,Tb927.2.420,Tb927.2.460,Tb927.2.540,Tb927.4.230,Tb927.6.5190	1.34483	1.36737
Tb427_050010700.1-p1-CDS1	Tb427_050010700.1	Chr5_core_Tb427v10	Tb927.1.4920	hypothetical protein	ZUnknown	hypothetical protein	23	-0.0417	NA	0	0.82	1.6	16	68	42	67	10	5	13	1.98	1.51	1.89	1.14	0.64	1.85	Tb927.1.4920	1.47508	1.36737
Tb427_000636900.1-p1-CDS1	Tb427_000636900.1	unitig_166_Tb427v10	Tb927.9.780	hypothetical protein	ZUnknown	hypothetical protein, conserved	23	-0.158	NA	0	0.66	12.5	125	63	54	67	10	9	6	1.83	1.94	1.89	1.14	1.16	0.85	Tb927.9.780	1.5008	1.36737
Tb427_000536900.1-p1-CDS1	Tb427_000536900.1	Chr8_5B_Tb427v10	Tb11.v5.1020	retrotransposon hot spot (RHS) protein	RHS	Reverse transcriptase (RNA-dependent DNA polymerase)	23	0.1119	NA	0	0.95	12.8	192	39	39	47	15	9	12	1.13	1.4	1.33	1.7	1.16	1.71	Tb11.v5.1020,Tb927.1.240,Tb927.1.500,Tb927.10.16200,Tb927.11.18610,Tb927.11.18630	1.62293	1.36737
Tb427_000743300.1-p1-CDS1	Tb427_000743300.1	unitig_2223_Tb427v10	Tb927.5.293b	hypothetical protein	ZUnknown	Protein of unknown function (DUF2974)	29	-0.0171	NA	0	1.08	24.5	196	84	71	75	8	12	12	2.44	2.55	2.12	0.91	1.55	1.71	Tb927.5.293b	1.67807	1.36737
Tb427_000655300.1-p1-CDS2	Tb427_000655300.1	unitig_1853_Tb427v10	Tb927.1.400	hypothetical protein, conserved	ZUnknown	hypothetical protein, conserved	21	-0.202	NA	0	0.53	7.46	97	62	43	55	13	7	5	1.8	1.54	1.55	1.48	0.9	0.71	Tb927.1.400	1.96347	1.36737
Tb427_000714600.1-p1-CDS1	Tb427_000714600.1	unitig_2125_Tb427v10	Tb11.v5.0655	trypanosome RHS family	ZUnknown	Endonuclease-reverse transcriptase	24	0.0804	NA	0	0.93	10.57	148	54	39	51	14	12	9	1.57	1.4	1.44	1.59	1.55	1.28	Tb11.v5.0655,Tb927.1.430,Tb927.1.450,Tb927.2.1140,Tb927.2.830,Tb927.4.110	2.0072	1.36737
Tb427_000271900.1-p1-CDS1	Tb427_000271900.1	Chr1_5A_Tb427v10	Tb09.v4.0025	VSG pseudogene	VSG	hypothetical protein, conserved	17	0.0237	NA	0	0.67	1.89	17	22	23	72	9	8	7	0.64	0.83	2.03	1.02	1.03	1	Tb09.v4.0025,Tb09.v4.0070,Tb09.v4.0078,Tb09.v4.0079,Tb09.v4.0169,Tb10.v4.0083,Tb10.v4.0107,Tb10.v4.0260,Tb11.0930,Tb11.0990,Tb11.1470,Tb11.v5.0137,Tb11.v5.0299,Tb11.v5.0795,Tb11.v5.0906,Tb927.11.17360,Tb927.11.18110,Tb927.11.18450,Tb927.11.18920,Tb927.5.4810,Tb927.5.4830,Tb927.9.1110,Tb927.9.18050,Tb927.9.850	2.41954	1.36737
Tb427_000783500.1-p1-CDS3	Tb427_000783500.1	unitig_2495_Tb427v10	Tb10.v4.0215	hypothetical protein	ZUnknown	hypothetical protein, conserved	27	-0.1575	NA	0	0.8	15.22	137	89	66	72	9	8	10	2.59	2.37	2.03	1.02	1.03	1.42	Tb10.v4.0215,Tb927.9.15820	1.19535	1.37851
Tb427_000658800.1-p1-CDS2	Tb427_000658800.1	unitig_1858_Tb427v10	Tb10.v4.0215	hypothetical protein	ZUnknown	hypothetical protein, conserved	25	-0.2164	NA	0	0.66	11.5	138	85	61	60	12	9	6	2.47	2.19	1.69	1.36	1.16	0.85	Tb10.v4.0215,Tb927.9.15820	1.26303	1.37851
Tb427_000701900.1-p1-CDS4	Tb427_000701900.1	unitig_2016_Tb427v10	Tb05.5K5.180	GRESAG 4 receptor-type adenylate cyclase	GRESAG	Adenylate and Guanylate cyclase catalytic domain containing protein	24	0.0158	NA	0	0.92	37.2	372	70	42	68	10	14	7	2.04	1.51	1.92	1.14	1.8	1	Tb05.5K5.180,Tb05.5K5.190,Tb09.v4.0009,Tb11.v5.0209,Tb11.v5.0217,Tb11.v5.0281,Tb11.v5.0379,Tb11.v5.0380,Tb11.v5.0424,Tb11.v5.0425,Tb11.v5.0429,Tb11.v5.0431,Tb11.v5.0456,Tb11.v5.0470,Tb11.v5.0484,Tb11.v5.0546,Tb11.v5.0576,Tb11.v5.0654,Tb11.v5.0784,Tb11.v5.0821,Tb11.v5.0830,Tb11.v5.0864,Tb11.v5.0865,Tb11.v5.1015,Tb11.v5.1016,Tb927.10.13040,Tb927.10.16000,Tb927.10.16190,Tb927.10.2430,Tb927.11.13740,…	1.34483	1.37851
Tb427_000699800.1-p1-CDS5	Tb427_000699800.1	unitig_2014_Tb427v10	Tb05.5K5.180	GRESAG 4 receptor-type adenylate cyclase	GRESAG	Adenylate and Guanylate cyclase catalytic domain containing protein	20	-0.0974	NA	0	0.61	20.73	228	48	37	64	11	10	4	1.4	1.33	1.81	1.25	1.29	0.57	Tb05.5K5.180,Tb05.5K5.190,Tb09.v4.0009,Tb11.v5.0209,Tb11.v5.0217,Tb11.v5.0281,Tb11.v5.0379,Tb11.v5.0380,Tb11.v5.0424,Tb11.v5.0425,Tb11.v5.0429,Tb11.v5.0431,Tb11.v5.0456,Tb11.v5.0470,Tb11.v5.0484,Tb11.v5.0546,Tb11.v5.0576,Tb11.v5.0654,Tb11.v5.0784,Tb11.v5.0821,Tb11.v5.0830,Tb11.v5.0864,Tb11.v5.0865,Tb11.v5.1015,Tb11.v5.1016,Tb927.10.13040,Tb927.10.16000,Tb927.10.16190,Tb927.10.2430,Tb927.11.13740,…	1.39506	1.37851
Tb427_000828400.1-p1-CDS6	Tb427_000828400.1	unitig_3147_Tb427v10	Tb927.2.300	DNA-directed RNA polymerase, pseudogene	Pseudogene	RNA polymerase Rpb2, domain 4	26	-0.2726	NA	0	0.61	28.9	289	95	70	68	10	10	4	2.76	2.51	1.92	1.14	1.29	0.57	Tb927.2.300,Tb927.2.420,Tb927.2.460,Tb927.2.540,Tb927.4.230,Tb927.6.5190	1.55582	1.37851
Tb427_000250500.1-p1-CDS1	Tb427_000250500.1	Chr1_3B_Tb427v10	Tb11.v5.1020	retrotransposon hot spot (RHS) protein	RHS	Endonuclease-reverse transcriptase/Reverse transcriptase (RNA-dependent DNA polymerase)	21	-0.0487	NA	0	0.72	29.91	329	52	38	64	11	5	11	1.51	1.36	1.81	1.25	0.64	1.57	Tb11.v5.1020,Tb927.1.240,Tb927.1.500,Tb927.10.16200,Tb927.11.18610,Tb927.11.18630	1.65076	1.37851
Tb427_000123800.1-p1-CDS2	Tb427_000123800.1	Chr11_3A_Tb427v10	Tb10.v4.0077	VSG pseudogene	VSG	Trypanosome variant surface glycoprotein (A-type)	25	0.2386	NA	0	1.16	26.79	375	40	35	52	14	12	14	1.16	1.26	1.47	1.59	1.55	1.99	Tb10.v4.0077,Tb10.v4.0121,Tb10.v4.0163,Tb10.v4.0186,Tb10.v4.0192,Tb11.v5.0362,Tb11.v5.0459,Tb11.v5.0460,Tb11.v5.0918,Tb927.11.100,Tb927.11.19620,Tb927.11.19920,Tb927.11.20040,Tb927.5.4980,Tb927.6.5280,Tb927.6.5370,Tb927.6.5660,Tb927.9.160,Tb927.9.16350,Tb927.9.16560,Tb927.9.17130,Tb927.9.17440,Tb927.9.17480,Tb927.9.17590,Tb927.9.420	1.65076	1.37851
Tb427_000784200.1-p1-CDS2	Tb427_000784200.1	unitig_2495_Tb427v10	Tb927.5.294b	hypothetical protein	ZUnknown	hypothetical protein, conserved	29	0.0038	NA	0	1.1	25.38	203	89	66	76	8	14	11	2.59	2.37	2.15	0.91	1.8	1.57	Tb927.5.294b	1.79909	1.37851
Tb427_000735100.1-p1-CDS3	Tb427_000735100.1	unitig_2216_Tb427v10	Tb05.5K5.180	GRESAG 4 receptor-type adenylate cyclase	GRESAG	Adenylate and Guanylate cyclase catalytic domain containing protein	26	0.0267	NA	0	0.96	15	225	72	50	49	15	12	10	2.09	1.8	1.38	1.7	1.55	1.42	Tb05.5K5.180,Tb05.5K5.190,Tb09.v4.0009,Tb11.v5.0209,Tb11.v5.0217,Tb11.v5.0281,Tb11.v5.0379,Tb11.v5.0380,Tb11.v5.0424,Tb11.v5.0425,Tb11.v5.0429,Tb11.v5.0431,Tb11.v5.0456,Tb11.v5.0470,Tb11.v5.0484,Tb11.v5.0546,Tb11.v5.0576,Tb11.v5.0654,Tb11.v5.0784,Tb11.v5.0821,Tb11.v5.0830,Tb11.v5.0864,Tb11.v5.0865,Tb11.v5.1015,Tb11.v5.1016,Tb927.10.13040,Tb927.10.16000,Tb927.10.16190,Tb927.10.2430,Tb927.11.13740,…	1.83592	1.37851
Tb427_000722300.1-p1-CDS1	Tb427_000722300.1	unitig_2166_Tb427v10	Tb09.v4.0041	leucine-rich repeat protein LRRP, pseudogene	LRRP	hypothetical protein, conserved	26	-0.0248	NA	0	0.9	46.33	417	62	62	73	9	15	6	1.8	2.23	2.06	1.02	1.93	0.85	Tb09.v4.0041,Tb11.v5.0448,Tb11.v5.0551,Tb11.v5.0560,Tb11.v5.0602,Tb11.v5.0703,Tb11.v5.0838,Tb927.1.290,Tb927.1.370,Tb927.1.480,Tb927.11.1500,Tb927.11.1510,Tb927.2.1310,Tb927.2.170,Tb927.2.690,Tb927.2.950,Tb927.3.1490,Tb927.4.160,Tb927.6.130,Tb927.7.7540,Tb927.9.14540	1.84398	1.37851
Tb427_000727400.1-p1-CDS2	Tb427_000727400.1	unitig_2175_Tb427v10	Tb09.v4.0013	retrotransposon hot spot (RHS) protein	RHS	Retrotransposon hot spot protein	28	-0.0905	NA	0	0.92	104.88	839	87	68	77	8	12	9	2.53	2.44	2.17	0.91	1.55	1.28	Tb09.v4.0013,Tb09.v4.0067,Tb11.0820,Tb11.1780,Tb11.v5.0214,Tb11.v5.0294,Tb11.v5.0295,Tb11.v5.0325,Tb11.v5.0326,Tb11.v5.0353,Tb11.v5.0489,Tb11.v5.0532,Tb11.v5.0533,Tb11.v5.0594,Tb11.v5.0624,Tb11.v5.0670,Tb11.v5.0693,Tb11.v5.0839,Tb927.1.120,Tb927.1.180,Tb927.1.190,Tb927.1.220,Tb927.1.70,Tb927.1.90,Tb927.10.110,Tb927.10.70,Tb927.2.100,Tb927.2.1120,Tb927.2.1180,Tb927.2.1210,Tb927.2.270,Tb927.2.280,T…	1.1177	1.38405
Tb427_000783200.1-p1-CDS1	Tb427_000783200.1	unitig_2495_Tb427v10	Tb927.11.17840	retrotransposon hot spot protein (RHS, pseudogene)	RHS	Retrotransposon hot spot protein	21	-0.0073	NA	0	0.77	24.63	197	58	31	77	8	14	4	1.69	1.11	2.17	0.91	1.8	0.57	Tb927.11.17840,Tb927.2.720,Tb927.2.980,Tb927.4.190,Tb927.5.160	1.84398	1.38405
Tb427_000676200.1-p1-CDS1	Tb427_000676200.1	unitig_1903_Tb427v10	Tb09.v4.0013	retrotransposon hot spot (RHS) protein	RHS	Retrotransposon hot spot protein	21	-0.0703	NA	0	0.65	56.83	682	38	46	61	12	11	4	1.11	1.65	1.72	1.36	1.42	0.57	Tb09.v4.0013,Tb09.v4.0067,Tb11.0820,Tb11.1780,Tb11.v5.0214,Tb11.v5.0294,Tb11.v5.0295,Tb11.v5.0325,Tb11.v5.0326,Tb11.v5.0353,Tb11.v5.0489,Tb11.v5.0532,Tb11.v5.0533,Tb11.v5.0594,Tb11.v5.0624,Tb11.v5.0670,Tb11.v5.0693,Tb11.v5.0839,Tb927.1.120,Tb927.1.180,Tb927.1.190,Tb927.1.220,Tb927.1.70,Tb927.1.90,Tb927.10.110,Tb927.10.70,Tb927.2.100,Tb927.2.1120,Tb927.2.1180,Tb927.2.1210,Tb927.2.270,Tb927.2.280,T…	1.9855	1.38405
Tb427_000772900.1-p1-CDS5	Tb427_000772900.1	unitig_2457_Tb427v10	Tb11.v5.1020	retrotransposon hot spot (RHS) protein	RHS	Reverse transcriptase (RNA-dependent DNA polymerase)	21	-0.2164	NA	0	0.52	9.92	119	63	44	61	12	7	5	1.83	1.58	1.72	1.36	0.9	0.71	Tb11.v5.1020,Tb927.1.240,Tb927.1.500,Tb927.10.16200,Tb927.11.18610,Tb927.11.18630	1.22651	1.38957
Tb427_000807900.1-p1-CDS1	Tb427_000807900.1	unitig_2801_Tb427v10	Tb927.9.780	hypothetical protein	ZUnknown	hypothetical protein, conserved	27	-0.1288	NA	0	0.84	21.57	151	92	63	81	7	9	10	2.68	2.26	2.29	0.79	1.16	1.42	Tb927.9.780	1.45943	1.38957
Tb427_000830800.1-p1-CDS5	Tb427_000830800.1	unitig_317_Tb427v10	Tb10.v4.0215	hypothetical protein	ZUnknown	hypothetical protein, conserved	27	-0.1397	NA	0	0.83	16.78	151	90	66	73	9	10	9	2.62	2.37	2.06	1.02	1.29	1.28	Tb10.v4.0215,Tb927.9.15820	1.52607	1.38957
Tb427_000781800.1-p1-CDS2	Tb427_000781800.1	unitig_2490_Tb427v10	Tb10.v4.0215	hypothetical protein	ZUnknown	hypothetical protein, conserved	24	-0.1222	NA	0	0.74	20.42	245	77	50	61	12	11	6	2.24	1.8	1.72	1.36	1.42	0.85	Tb10.v4.0215,Tb927.9.15820	1.53107	1.38957
Tb427_000780200.1-p1-CDS4	Tb427_000780200.1	unitig_2489_Tb427v10	Tb05.5K5.180	GRESAG 4 receptor-type adenylate cyclase	GRESAG	Adenylate and Guanylate cyclase catalytic domain containing protein	21	-0.0581	NA	0	0.71	24.6	246	55	36	69	10	7	9	1.6	1.29	1.95	1.14	0.9	1.28	Tb05.5K5.180,Tb05.5K5.190,Tb09.v4.0009,Tb11.v5.0209,Tb11.v5.0217,Tb11.v5.0281,Tb11.v5.0379,Tb11.v5.0380,Tb11.v5.0424,Tb11.v5.0425,Tb11.v5.0429,Tb11.v5.0431,Tb11.v5.0456,Tb11.v5.0470,Tb11.v5.0484,Tb11.v5.0546,Tb11.v5.0576,Tb11.v5.0654,Tb11.v5.0784,Tb11.v5.0821,Tb11.v5.0830,Tb11.v5.0864,Tb11.v5.0865,Tb11.v5.1015,Tb11.v5.1016,Tb927.10.13040,Tb927.10.16000,Tb927.10.16190,Tb927.10.2430,Tb927.11.13740,…	1.94486	1.38957
Tb427_000746000.1-p1-CDS10	Tb427_000746000.1	unitig_2230_Tb427v10	Tb05.5K5.180	GRESAG 4 receptor-type adenylate cyclase	GRESAG	Adenylate and Guanylate cyclase catalytic domain containing protein	26	0.1299	NA	0	1.09	29.8	298	57	48	69	10	14	11	1.66	1.72	1.95	1.14	1.8	1.57	Tb05.5K5.180,Tb05.5K5.190,Tb09.v4.0009,Tb11.v5.0209,Tb11.v5.0217,Tb11.v5.0281,Tb11.v5.0379,Tb11.v5.0380,Tb11.v5.0424,Tb11.v5.0425,Tb11.v5.0429,Tb11.v5.0431,Tb11.v5.0456,Tb11.v5.0470,Tb11.v5.0484,Tb11.v5.0546,Tb11.v5.0576,Tb11.v5.0654,Tb11.v5.0784,Tb11.v5.0821,Tb11.v5.0830,Tb11.v5.0864,Tb11.v5.0865,Tb11.v5.1015,Tb11.v5.1016,Tb927.10.13040,Tb927.10.16000,Tb927.10.16190,Tb927.10.2430,Tb927.11.13740,…	1.5008	1.39506
Tb427_000499100.1-p1-CDS4	Tb427_000499100.1	Chr8_3A_Tb427v10	Tb927.2.300	DNA-directed RNA polymerase, pseudogene	Pseudogene	RNA polymerase Rpb2, domain 4/RNA polymerase Rpb2, domain 6	27	0.0881	NA	0	1.09	21.45	236	70	53	65	11	14	11	2.04	1.9	1.84	1.25	1.8	1.57	Tb927.2.300,Tb927.2.420,Tb927.2.460,Tb927.2.540,Tb927.4.230,Tb927.6.5190	1.46989	1.40054
Tb427_000747100.1-p1-CDS8	Tb427_000747100.1	unitig_223_Tb427v10	Tb11.v5.1020	retrotransposon hot spot (RHS) protein	RHS	hypothetical protein, conserved	20	-0.2633	NA	0	0.43	14.7	147	63	41	69	10	7	3	1.83	1.47	1.95	1.14	0.9	0.43	Tb11.v5.1020,Tb927.1.240,Tb927.1.500,Tb927.10.16200,Tb927.11.18610,Tb927.11.18630	2.24793	1.40054
Tb427_000840000.1-p1-CDS6	Tb427_000840000.1	unitig_52_Tb427v10	Tb10.v4.0215	hypothetical protein	ZUnknown	hypothetical protein, conserved	28	-0.0228	NA	0	1	21	210	81	65	69	10	13	10	2.36	2.33	1.95	1.14	1.68	1.42	Tb10.v4.0215,Tb927.9.15820	2.38681	1.40054
Tb427_000484800.1-p1-CDS2	Tb427_000484800.1	Chr8_3A_Tb427v10	Tb927.9.780	hypothetical protein	ZUnknown	hypothetical protein, conserved	30	0.1109	NA	0	1.23	9.4	94	72	67	69	10	13	15	2.09	2.41	1.95	1.14	1.68	2.13	Tb927.9.780	1.42223	1.40599
Tb427_000200300.1-p1-CDS1	Tb427_000200300.1	Chr1_3A_Tb427v10	Tb927.1.490	hypothetical protein	ZUnknown	hypothetical protein, conserved	23	-0.2783	NA	0	0.52	14.27	157	74	57	65	11	6	6	2.15	2.05	1.84	1.25	0.77	0.85	Tb927.1.490,Tb927.4.180,Tb927.9.740	1.73985	1.40599
Tb427_000820500.1-p1-CDS1	Tb427_000820500.1	unitig_3048_Tb427v10	Tb05.5K5.180	GRESAG 4 receptor-type adenylate cyclase	GRESAG	Adenylate and Guanylate cyclase catalytic domain containing protein	25	0.0546	NA	0	0.95	12.82	141	55	50	66	11	13	9	1.6	1.8	1.86	1.25	1.68	1.28	Tb05.5K5.180,Tb05.5K5.190,Tb09.v4.0009,Tb11.v5.0209,Tb11.v5.0217,Tb11.v5.0281,Tb11.v5.0379,Tb11.v5.0380,Tb11.v5.0424,Tb11.v5.0425,Tb11.v5.0429,Tb11.v5.0431,Tb11.v5.0456,Tb11.v5.0470,Tb11.v5.0484,Tb11.v5.0546,Tb11.v5.0576,Tb11.v5.0654,Tb11.v5.0784,Tb11.v5.0821,Tb11.v5.0830,Tb11.v5.0864,Tb11.v5.0865,Tb11.v5.1015,Tb11.v5.1016,Tb927.10.13040,Tb927.10.16000,Tb927.10.16190,Tb927.10.2430,Tb927.11.13740,…	2.05658	1.40599
Tb427_000635200.1-p1-CDS2	Tb427_000635200.1	unitig_148_Tb427v10	Tb09.v4.0013	retrotransposon hot spot (RHS) protein	RHS	Retrotransposon hot spot protein	21	-0.2894	NA	0	0.43	45.5	273	68	56	86	6	6	4	1.98	2.01	2.43	0.68	0.77	0.57	Tb09.v4.0013,Tb09.v4.0067,Tb11.0820,Tb11.1780,Tb11.v5.0214,Tb11.v5.0294,Tb11.v5.0295,Tb11.v5.0325,Tb11.v5.0326,Tb11.v5.0353,Tb11.v5.0489,Tb11.v5.0532,Tb11.v5.0533,Tb11.v5.0594,Tb11.v5.0624,Tb11.v5.0670,Tb11.v5.0693,Tb11.v5.0839,Tb927.1.120,Tb927.1.180,Tb927.1.190,Tb927.1.220,Tb927.1.70,Tb927.1.90,Tb927.10.110,Tb927.10.70,Tb927.2.100,Tb927.2.1120,Tb927.2.1180,Tb927.2.1210,Tb927.2.270,Tb927.2.280,T…	1.21412	1.42223
Tb427_000818600.1-p1-CDS3	Tb427_000818600.1	unitig_3033_Tb427v10	Tb09.v4.0013	retrotransposon hot spot (RHS) protein	RHS	Retrotransposon hot spot protein	25	-0.1493	NA	0	0.75	27.55	303	72	66	66	11	6	11	2.09	2.37	1.86	1.25	0.77	1.57	Tb09.v4.0013,Tb09.v4.0067,Tb11.0820,Tb11.1780,Tb11.v5.0214,Tb11.v5.0294,Tb11.v5.0295,Tb11.v5.0325,Tb11.v5.0326,Tb11.v5.0353,Tb11.v5.0489,Tb11.v5.0532,Tb11.v5.0533,Tb11.v5.0594,Tb11.v5.0624,Tb11.v5.0670,Tb11.v5.0693,Tb11.v5.0839,Tb927.1.120,Tb927.1.180,Tb927.1.190,Tb927.1.220,Tb927.1.70,Tb927.1.90,Tb927.10.110,Tb927.10.70,Tb927.2.100,Tb927.2.1120,Tb927.2.1180,Tb927.2.1210,Tb927.2.270,Tb927.2.280,T…	1.66448	1.42223
Tb427_000638400.1-p1-CDS1	Tb427_000638400.1	unitig_166_Tb427v10	Tb11.v5.1020	retrotransposon hot spot (RHS) protein	RHS	hypothetical protein, conserved	28	0.1844	NA	0	1.22	22.08	265	72	43	62	12	14	14	2.09	1.54	1.75	1.36	1.8	1.99	Tb11.v5.1020,Tb927.1.240,Tb927.1.500,Tb927.10.16200,Tb927.11.18610,Tb927.11.18630	1.29866	1.42761
Tb427_000495900.1-p1-CDS3	Tb427_000495900.1	Chr8_3A_Tb427v10	Tb11.v5.0349	DNA-directed RNA polymerase II subunit 2	RNA.synthesis	RNA polymerase Rpb2, domain 6	23	-0.0391	NA	0	0.79	56.22	506	60	42	74	9	8	10	1.75	1.51	2.09	1.02	1.03	1.42	Tb11.v5.0349,Tb927.1.100,Tb927.2.1110,Tb927.2.1200,Tb927.2.490	1.42761	1.42761
Tb427_000122700.1-p1-CDS3	Tb427_000122700.1	Chr11_3A_Tb427v10	Tb927.11.18620	variant surface glycoprotein (VSG)	VSG	hypothetical protein, conserved	21	-0.1472	NA	0	0.59	27.73	305	59	44	66	11	11	3	1.72	1.58	1.86	1.25	1.42	0.43	Tb927.11.18620,Tb927.11.19850	1.65076	1.42761
Tb427_000107100.1-p1-CDS2	Tb427_000107100.1	Chr10_5A_Tb427v10	Tb11.v5.0985	variant surface glycoprotein (VSG)-related	VSG	Trypanosomal VSG domain containing protein	23	-0.1198	NA	0	0.7	1.36	15	59	53	66	11	7	9	1.72	1.9	1.86	1.25	0.9	1.28	Tb11.v5.0985,Tb927.5.130	1.65076	1.42761
Tb427_000437500.1-p1-CDS1	Tb427_000437500.1	Chr6_3B_Tb427v10	Tb05.5K5.300	VSG pseudogene,variant surface glycoprotein, degenerate	VSG	Trypanosomal VSG domain/Trypanosome variant surface glycoprotein C-terminal domain containing protein	22	0	NA	0	0.76	16	240	45	42	50	15	14	4	1.31	1.51	1.41	1.7	1.8	0.57	Tb05.5K5.300,Tb08.27P2.240,Tb09.v4.0063,Tb09.v4.0128,Tb10.v4.0058,Tb10.v4.0060,Tb10.v4.0143,Tb11.v5.0144,Tb11.v5.0283,Tb11.v5.0921,Tb927.11.17400,Tb927.3.170,Tb927.3.450,Tb927.4.5750,Tb927.5.4650,Tb927.5.5010,Tb927.6.5300,Tb927.8.180,Tb927.9.1210,Tb927.9.16330,Tb927.9.200	1.72247	1.42761
Tb427_000404100.1-p1-CDS2	Tb427_000404100.1	Chr6_3A_Tb427v10	Tb927.1.490	hypothetical protein	ZUnknown	hypothetical protein	28	-0.0367	NA	0	1	3.83	23	85	67	86	6	12	11	2.47	2.41	2.43	0.68	1.55	1.57	Tb927.1.490,Tb927.4.180,Tb927.9.740	1.72683	1.42761
Tb427_060011400.1-p1-CDS2	Tb427_060011400.1	Chr6_core_Tb427v10	Tb927.6.810	hypothetical protein	ZUnknown	hypothetical protein, conserved	30	0.2003	NA	0	1.33	1	12	72	57	62	12	21	10	2.09	2.05	1.75	1.36	2.71	1.42	Tb927.6.810	1.78241	1.42761
Tb427_000626800.1-p1-CDS1	Tb427_000626800.1	Chr9_5A_Tb427v10	Tb11.v5.1020	retrotransposon hot spot (RHS) protein	RHS	Reverse transcriptase (RNA-dependent DNA polymerase)	23	-0.0249	NA	0	0.78	17.69	230	67	34	58	13	10	8	1.95	1.22	1.64	1.48	1.29	1.14	Tb11.v5.1020,Tb927.1.240,Tb927.1.500,Tb927.10.16200,Tb927.11.18610,Tb927.11.18630	1.9222	1.42761
Tb427_000707500.1-p1-CDS2	Tb427_000707500.1	unitig_2087_Tb427v10	Tb11.1790	retrotransposon hot spot protein (RHS, pseudogene)	RHS	Retrotransposon hot spot protein	25	0.0337	NA	0	0.91	20.85	271	59	48	58	13	11	10	1.72	1.72	1.64	1.48	1.42	1.42	Tb11.1790,Tb11.v5.0567,Tb11.v5.0713,Tb927.1.420,Tb927.2.1080,Tb927.2.1170,Tb927.2.240,Tb927.4.250,Tb927.6.140	2.07724	1.42761
Tb427_000701000.1-p1-CDS2	Tb427_000701000.1	unitig_2015_Tb427v10	Tb10.v4.0215	hypothetical protein	ZUnknown	hypothetical protein, conserved	28	-0.2021	NA	0	0.78	10.86	76	108	76	83	7	10	8	3.14	2.73	2.34	0.79	1.29	1.14	Tb10.v4.0215,Tb927.9.15820	2.19535	1.42761
Tb427_000107600.1-p1-CDS1	Tb427_000107600.1	Chr10_5A_Tb427v10	Tb927.9.700	hypothetical protein	ZUnknown	hypothetical protein, conserved	30	0.0119	NA	0	1.13	6.14	43	96	64	83	7	13	13	2.79	2.3	2.34	0.79	1.68	1.85	Tb927.9.700	1.43829	1.43296
Tb427_030026300.1-p1-CDS1	Tb427_030026300.1	Chr3_core_Tb427v10	Tb927.3.2550	hypothetical protein, conserved	ZUnknown	hypothetical protein, conserved	21	-0.0048	NA	0	0.76	15.86	111	40	43	83	7	13	5	1.16	1.54	2.34	0.79	1.68	0.71	Tb927.3.2550,Tb927.3.2560,Tb927.3.2570	1.46989	1.43296
Tb427_000006000.1-p1-CDS3	Tb427_000006000.1	BES11_Tb427v10	Tb927.7.3250	ESAG6, transferrin receptor	ESAG	Trypanosome variant surface glycoprotein (A-type)	19	0.1179	NA	0	0.94	37.08	445	12	6	63	12	4	17	0.35	0.22	1.78	1.36	0.52	2.42	Tb927.7.3250,Tb927.7.3260	1.57531	1.43296
Tb427_000786900.1-p1-CDS2	Tb427_000786900.1	unitig_2512_Tb427v10	Tb05.5K5.350	ESAG3 pseudogene	ESAG.pseudo	hypothetical protein, conserved	27	-0.1363	NA	0	0.82	11.25	90	102	57	79	8	10	9	2.97	2.05	2.23	0.91	1.29	1.28	Tb05.5K5.350,Tb05.5K5.420,Tb05.5K5.500,Tb08.27P2.160,Tb08.27P2.250,Tb08.27P2.330,Tb08.27P2.400,Tb08.27P2.520,Tb09.v4.0024,Tb09.v4.0027,Tb09.v4.0033,Tb09.v4.0045,Tb09.v4.0062,Tb09.v4.0083,Tb09.v4.0100,Tb09.v4.0115,Tb09.v4.0130,Tb09.v4.0132,Tb09.v4.0154,Tb09.v4.0160,Tb09.v4.0172,Tb09.v4.0181,Tb09.v4.0201,Tb09.v4.0206,Tb10.v4.0057,Tb10.v4.0066,Tb10.v4.0074,Tb10.v4.0090,Tb10.v4.0101,Tb10.v4.0137,Tb10…	1.72683	1.43296
Tb427_000445800.1-p1-CDS2	Tb427_000445800.1	Chr6_3B_Tb427v10	Tb10.v4.0214	ESAG9 pseudogene	ESAG.pseudo	hypothetical protein	25	-0.0604	NA	0	0.83	1.33	16	75	48	63	12	8	11	2.18	1.72	1.78	1.36	1.03	1.57	Tb10.v4.0214,Tb11.v5.0772,Tb927.1.5220,Tb927.10.60,Tb927.11.17880,Tb927.9.680,Tb927.9.7370	1.75275	1.43296
Tb427_000763500.1-p1-CDS4	Tb427_000763500.1	unitig_2344_Tb427v10	Tb05.5K5.180	GRESAG 4 receptor-type adenylate cyclase	GRESAG	Adenylate and Guanylate cyclase catalytic domain containing protein	25	-0.0986	NA	0	0.78	30.89	278	74	51	75	9	8	10	2.15	1.83	2.12	1.02	1.03	1.42	Tb05.5K5.180,Tb05.5K5.190,Tb09.v4.0009,Tb11.v5.0209,Tb11.v5.0217,Tb11.v5.0281,Tb11.v5.0379,Tb11.v5.0380,Tb11.v5.0424,Tb11.v5.0425,Tb11.v5.0429,Tb11.v5.0431,Tb11.v5.0456,Tb11.v5.0470,Tb11.v5.0484,Tb11.v5.0546,Tb11.v5.0576,Tb11.v5.0654,Tb11.v5.0784,Tb11.v5.0821,Tb11.v5.0830,Tb11.v5.0864,Tb11.v5.0865,Tb11.v5.1015,Tb11.v5.1016,Tb927.10.13040,Tb927.10.16000,Tb927.10.16190,Tb927.10.2430,Tb927.11.13740,…	1.76553	1.43296
Tb427_000826100.1-p1-CDS6	Tb427_000826100.1	unitig_309_Tb427v10	Tb05.5K5.180	GRESAG 4 receptor-type adenylate cyclase	GRESAG	Adenylate and Guanylate cyclase catalytic domain containing protein	28	0.2149	NA	0	1.26	26.09	287	58	51	67	11	13	16	1.69	1.83	1.89	1.25	1.68	2.28	Tb05.5K5.180,Tb05.5K5.190,Tb09.v4.0009,Tb11.v5.0209,Tb11.v5.0217,Tb11.v5.0281,Tb11.v5.0379,Tb11.v5.0380,Tb11.v5.0424,Tb11.v5.0425,Tb11.v5.0429,Tb11.v5.0431,Tb11.v5.0456,Tb11.v5.0470,Tb11.v5.0484,Tb11.v5.0546,Tb11.v5.0576,Tb11.v5.0654,Tb11.v5.0784,Tb11.v5.0821,Tb11.v5.0830,Tb11.v5.0864,Tb11.v5.0865,Tb11.v5.1015,Tb11.v5.1016,Tb927.10.13040,Tb927.10.16000,Tb927.10.16190,Tb927.10.2430,Tb927.11.13740,…	1.82375	1.43296
Tb427_000776800.1-p1-CDS4	Tb427_000776800.1	unitig_2476_Tb427v10	Tb05.5K5.180	GRESAG 4 receptor-type adenylate cyclase	GRESAG	Adenylate and Guanylate cyclase catalytic domain containing protein	24	-0.0215	NA	0	0.83	25.5	306	62	45	63	12	8	11	1.8	1.62	1.78	1.36	1.03	1.57	Tb05.5K5.180,Tb05.5K5.190,Tb09.v4.0009,Tb11.v5.0209,Tb11.v5.0217,Tb11.v5.0281,Tb11.v5.0379,Tb11.v5.0380,Tb11.v5.0424,Tb11.v5.0425,Tb11.v5.0429,Tb11.v5.0431,Tb11.v5.0456,Tb11.v5.0470,Tb11.v5.0484,Tb11.v5.0546,Tb11.v5.0576,Tb11.v5.0654,Tb11.v5.0784,Tb11.v5.0821,Tb11.v5.0830,Tb11.v5.0864,Tb11.v5.0865,Tb11.v5.1015,Tb11.v5.1016,Tb927.10.13040,Tb927.10.16000,Tb927.10.16190,Tb927.10.2430,Tb927.11.13740,…	1.83188	1.43296
Tb427_000835700.1-p1-CDS4	Tb427_000835700.1	unitig_427_Tb427v10	Tb927.2.300	DNA-directed RNA polymerase, pseudogene	Pseudogene	RNA polymerase Rpb2, domain 4/RNA polymerase Rpb2, domain 6	29	-0.0213	NA	0	1.02	20.45	225	92	60	67	11	6	17	2.68	2.15	1.89	1.25	0.77	2.42	Tb927.2.300,Tb927.2.420,Tb927.2.460,Tb927.2.540,Tb927.4.230,Tb927.6.5190	1.8679	1.43296
Tb427_000222600.1-p1-CDS2	Tb427_000222600.1	Chr1_3A_Tb427v10	Tb927.11.17840	retrotransposon hot spot protein (RHS, pseudogene)	RHS	Retrotransposon hot spot protein	25	-0.1611	NA	0	0.69	16.6	83	87	57	91	5	7	9	2.53	2.05	2.57	0.57	0.9	1.28	Tb927.11.17840,Tb927.2.720,Tb927.2.980,Tb927.4.190,Tb927.5.160	2.41143	1.43296
Tb427_000165900.1-p1-CDS1	Tb427_000165900.1	Chr11_3B_Tb427v10	Tb11.v5.1020	retrotransposon hot spot (RHS) protein	RHS	Endonuclease-reverse transcriptase/Reverse transcriptase (RNA-dependent DNA polymerase)	29	0.2042	NA	0	1.3	46.63	373	66	49	79	8	14	16	1.92	1.76	2.23	0.91	1.8	2.28	Tb11.v5.1020,Tb927.1.240,Tb927.1.500,Tb927.10.16200,Tb927.11.18610,Tb927.11.18630	2.45418	1.43296
Tb427_000682700.1-p1-CDS3	Tb427_000682700.1	unitig_1912_Tb427v10	Tb09.v4.0013	retrotransposon hot spot (RHS) protein	RHS	Retrotransposon hot spot protein	26	-0.3286	NA	0	0.53	6.22	56	98	83	75	9	3	9	2.85	2.98	2.12	1.02	0.39	1.28	Tb09.v4.0013,Tb09.v4.0067,Tb11.0820,Tb11.1780,Tb11.v5.0214,Tb11.v5.0294,Tb11.v5.0295,Tb11.v5.0325,Tb11.v5.0326,Tb11.v5.0353,Tb11.v5.0489,Tb11.v5.0532,Tb11.v5.0533,Tb11.v5.0594,Tb11.v5.0624,Tb11.v5.0670,Tb11.v5.0693,Tb11.v5.0839,Tb927.1.120,Tb927.1.180,Tb927.1.190,Tb927.1.220,Tb927.1.70,Tb927.1.90,Tb927.10.110,Tb927.10.70,Tb927.2.100,Tb927.2.1120,Tb927.2.1180,Tb927.2.1210,Tb927.2.270,Tb927.2.280,T…	2.72683	1.43296
Tb427_000662400.1-p1-CDS1	Tb427_000662400.1	unitig_1863_Tb427v10	Tb09.v4.0013	retrotransposon hot spot (RHS) protein	RHS	Retrotransposon hot spot protein	26	-0.074	NA	0	0.86	44.44	400	67	66	75	9	12	8	1.95	2.37	2.12	1.02	1.55	1.14	Tb09.v4.0013,Tb09.v4.0067,Tb11.0820,Tb11.1780,Tb11.v5.0214,Tb11.v5.0294,Tb11.v5.0295,Tb11.v5.0325,Tb11.v5.0326,Tb11.v5.0353,Tb11.v5.0489,Tb11.v5.0532,Tb11.v5.0533,Tb11.v5.0594,Tb11.v5.0624,Tb11.v5.0670,Tb11.v5.0693,Tb11.v5.0839,Tb927.1.120,Tb927.1.180,Tb927.1.190,Tb927.1.220,Tb927.1.70,Tb927.1.90,Tb927.10.110,Tb927.10.70,Tb927.2.100,Tb927.2.1120,Tb927.2.1180,Tb927.2.1210,Tb927.2.270,Tb927.2.280,T…	1.33342	1.43829
Tb427_000246200.1-p1-CDS4	Tb427_000246200.1	Chr1_3B_Tb427v10	Tb11.v5.1020	retrotransposon hot spot (RHS) protein	RHS	Reverse transcriptase (RNA-dependent DNA polymerase)	27	0.0698	NA	0	1.04	7.83	94	70	51	63	12	11	13	2.04	1.83	1.78	1.36	1.42	1.85	Tb11.v5.1020,Tb927.1.240,Tb927.1.500,Tb927.10.16200,Tb927.11.18610,Tb927.11.18630	1.41143	1.43829
Tb427_110094800.1-p1-CDS1	Tb427_110094800.1	Chr11_core_Tb427v10	Tb11.v5.1020	retrotransposon hot spot (RHS) protein	RHS	Reverse transcriptase (RNA-dependent DNA polymerase)	24	0.1286	NA	0	0.98	17.92	215	54	30	63	12	15	8	1.57	1.08	1.78	1.36	1.93	1.14	Tb11.v5.1020,Tb927.1.240,Tb927.1.500,Tb927.10.16200,Tb927.11.18610,Tb927.11.18630	1.5008	1.43829
Tb427_000484700.1-p1-CDS2	Tb427_000484700.1	Chr8_3A_Tb427v10	Tb10.v4.0215	hypothetical protein	ZUnknown	hypothetical protein, conserved	25	-0.2027	NA	0	0.64	18.5	111	93	57	87	6	10	5	2.7	2.05	2.46	0.68	1.29	0.71	Tb10.v4.0215,Tb927.9.15820	1.70487	1.43829
Tb427_000288400.1-p1-CDS1	Tb427_000288400.1	Chr3_3A_Tb427v10	Tb927.1.490	hypothetical protein	ZUnknown	hypothetical protein, conserved	23	-0.1622	NA	0	0.65	43	344	83	42	79	8	8	7	2.41	1.51	2.23	0.91	1.03	1	Tb927.1.490,Tb927.4.180,Tb927.9.740	1.72683	1.43829
Tb427_000658300.1-p1-CDS2	Tb427_000658300.1	unitig_1858_Tb427v10	Tb927.1.270	hypothetical protein	ZUnknown	hypothetical protein	25	-0.2161	NA	0	0.65	22.91	252	87	56	67	11	7	8	2.53	2.01	1.89	1.25	0.9	1.14	Tb927.1.270,Tb927.2.1250,Tb927.2.650,Tb927.2.900,Tb927.4.120	1.72683	1.43829
Tb427_000497600.1-p1-CDS1	Tb427_000497600.1	Chr8_3A_Tb427v10	Tb927.1.400	hypothetical protein, conserved	ZUnknown	hypothetical protein, conserved	28	-0.1138	NA	0	0.86	16.91	186	86	67	67	11	12	8	2.5	2.41	1.89	1.25	1.55	1.14	Tb927.1.400	1.7866	1.43829
Tb427_000484900.1-p1-CDS1	Tb427_000484900.1	Chr8_3A_Tb427v10	Tb09.v4.0152	hypothetical protein	ZUnknown	hypothetical protein, conserved	27	0.1326	NA	0	1.12	16.08	193	62	53	63	12	13	13	1.8	1.9	1.78	1.36	1.68	1.85	Tb09.v4.0152,Tb927.11.17830,Tb927.9.760	1.81967	1.43829
Tb427_000341400.1-p1-CDS1	Tb427_000341400.1	Chr4_3B_Tb427v10	Tb11.v5.1020	retrotransposon hot spot (RHS) protein	RHS	Reverse transcriptase (RNA-dependent DNA polymerase)	18	-0.2261	NA	0	0.33	20.13	322	44	32	47	16	6	2	1.28	1.15	1.33	1.82	0.77	0.28	Tb11.v5.1020,Tb927.1.240,Tb927.1.500,Tb927.10.16200,Tb927.11.18610,Tb927.11.18630	1.94486	1.43829
Tb427_000379800.1-p1-CDS3	Tb427_000379800.1	Chr6_3A_Tb427v10	Tb927.11.18620	variant surface glycoprotein (VSG)	VSG	hypothetical protein, conserved	21	-0.1214	NA	0	0.59	21	273	58	37	59	13	11	3	1.69	1.33	1.67	1.48	1.42	0.43	Tb927.11.18620,Tb927.11.19850	1.96347	1.43829
Tb427_100076100.1-p1-CDS2	Tb427_100076100.1	Chr10_core_Tb427v10	Tb11.v5.0806	hypothetical protein, conserved	ZUnknown	hypothetical protein, conserved	23	-0.2248	NA	0	0.56	1	13	78	47	59	13	6	7	2.27	1.69	1.67	1.48	0.77	1	Tb11.v5.0806,Tb927.10.7010	2.0072	1.43829
Tb427_000691000.1-p1-CDS1	Tb427_000691000.1	unitig_1960_Tb427v10	Tb10.v4.0215	hypothetical protein	ZUnknown	hypothetical protein, conserved	25	-0.1335	NA	0	0.69	9.63	154	86	44	47	16	9	7	2.5	1.58	1.33	1.82	1.16	1	Tb10.v4.0215,Tb927.9.15820	2.10434	1.43829
Tb427_000524800.1-p1-CDS1	Tb427_000524800.1	Chr8_5B_Tb427v10	Tb927.9.7420	ESAG9	ESAG	hypothetical protein, conserved	25	-0.1309	NA	0	0.73	9.82	108	67	58	68	11	8	9	1.95	2.08	1.92	1.25	1.03	1.28	Tb927.9.7420	2.47768	1.43829
Tb427_000782900.1-p1-CDS1	Tb427_000782900.1	unitig_2495_Tb427v10	Tb09.v4.0041	leucine-rich repeat protein LRRP, pseudogene	LRRP	hypothetical protein, conserved	23	-0.2079	NA	0	0.6	41.67	500	73	52	64	12	6	8	2.12	1.87	1.81	1.36	0.77	1.14	Tb09.v4.0041,Tb11.v5.0448,Tb11.v5.0551,Tb11.v5.0560,Tb11.v5.0602,Tb11.v5.0703,Tb11.v5.0838,Tb927.1.290,Tb927.1.370,Tb927.1.480,Tb927.11.1500,Tb927.11.1510,Tb927.2.1310,Tb927.2.170,Tb927.2.690,Tb927.2.950,Tb927.3.1490,Tb927.4.160,Tb927.6.130,Tb927.7.7540,Tb927.9.14540	2.5435	1.43829
Tb427_000839800.1-p1-CDS4	Tb427_000839800.1	unitig_52_Tb427v10	Tb927.2.300	DNA-directed RNA polymerase, pseudogene	Pseudogene	RNA polymerase Rpb2, domain 4	27	0.0137	NA	0	0.97	38.78	349	72	55	76	9	14	9	2.09	1.97	2.15	1.02	1.8	1.28	Tb927.2.300,Tb927.2.420,Tb927.2.460,Tb927.2.540,Tb927.4.230,Tb927.6.5190	1.42761	1.4489
Tb427_000682000.1-p1-CDS4	Tb427_000682000.1	unitig_1911_Tb427v10	Tb927.2.300	DNA-directed RNA polymerase, pseudogene	Pseudogene	RNA polymerase Rpb2, domain 4/RNA polymerase Rpb2, domain 6	25	-0.3185	NA	0	0.51	30.54	397	80	73	60	13	6	6	2.33	2.62	1.69	1.48	0.77	0.85	Tb927.2.300,Tb927.2.420,Tb927.2.460,Tb927.2.540,Tb927.4.230,Tb927.6.5190	1.55582	1.4489
Tb427_000083300.1-p1-CDS1	Tb427_000083300.1	Chr10_3B_Tb427v10	Tb11.v5.1020	retrotransposon hot spot (RHS) protein	RHS	Reverse transcriptase (RNA-dependent DNA polymerase)	28	-0.0468	NA	0	0.93	29.18	321	76	67	68	11	14	8	2.21	2.41	1.92	1.25	1.8	1.14	Tb11.v5.1020,Tb927.1.240,Tb927.1.500,Tb927.10.16200,Tb927.11.18610,Tb927.11.18630	1.57046	1.4489
Tb427_000662700.1-p1-CDS1	Tb427_000662700.1	unitig_1870_Tb427v10	Tb09.v4.0013	retrotransposon hot spot (RHS) protein	RHS	Retrotransposon hot spot protein	20	0.1145	NA	0	0.85	25.14	352	30	21	56	14	13	7	0.87	0.75	1.58	1.59	1.68	1	Tb09.v4.0013,Tb09.v4.0067,Tb11.0820,Tb11.1780,Tb11.v5.0214,Tb11.v5.0294,Tb11.v5.0295,Tb11.v5.0325,Tb11.v5.0326,Tb11.v5.0353,Tb11.v5.0489,Tb11.v5.0532,Tb11.v5.0533,Tb11.v5.0594,Tb11.v5.0624,Tb11.v5.0670,Tb11.v5.0693,Tb11.v5.0839,Tb927.1.120,Tb927.1.180,Tb927.1.190,Tb927.1.220,Tb927.1.70,Tb927.1.90,Tb927.10.110,Tb927.10.70,Tb927.2.100,Tb927.2.1120,Tb927.2.1180,Tb927.2.1210,Tb927.2.270,Tb927.2.280,T…	1.72683	1.4489
Tb427_000108800.1-p1-CDS1	Tb427_000108800.1	Chr10_5B_Tb427v10	Tb10.v4.0215	hypothetical protein	ZUnknown	hypothetical protein	26	-0.2412	NA	0	0.64	1	8	89	67	80	8	7	8	2.59	2.41	2.26	0.91	0.9	1.14	Tb10.v4.0215,Tb927.9.15820	1.79909	1.4489
Tb427_000714400.1-p1-CDS1	Tb427_000714400.1	unitig_2121_Tb427v10	Tb09.v4.0153	hypothetical protein	ZUnknown	hypothetical protein, conserved	25	-0.1967	NA	0	0.67	28.67	258	71	74	76	9	11	5	2.06	2.66	2.15	1.02	1.42	0.71	Tb09.v4.0153	1.84398	1.4489
Tb427_000630700.1-p1-CDS2	Tb427_000630700.1	Tb427VSG-2061_unitig_Tb427v10	Tb10.v4.0215	hypothetical protein	ZUnknown	hypothetical protein, conserved	30	-0.0419	NA	0	1.03	25.44	229	89	75	76	9	10	14	2.59	2.69	2.15	1.02	1.29	1.99	Tb10.v4.0215,Tb927.9.15820	1.87971	1.4489
Tb427_000630700.1-p1-CDS3	Tb427_000630700.1	Tb427VSG-2061_unitig_Tb427v10	Tb10.v4.0215	hypothetical protein	ZUnknown	hypothetical protein, conserved	30	-0.1333	NA	0	0.91	30.67	368	94	87	64	12	8	13	2.73	3.12	1.81	1.36	1.03	1.85	Tb10.v4.0215,Tb927.9.15820	1.9222	1.4489
Tb427_100119900.1-p1-CDS1	Tb427_100119900.1	Chr10_core_Tb427v10	Tb927.10.11280	hypothetical protein, T brucei brucei only	ZUnknown	hypothetical protein, conserved	18	-0.2741	NA	0	0.34	1	15	52	36	52	15	4	4	1.51	1.29	1.47	1.7	0.52	0.57	Tb927.10.11280	1.9222	1.4489
Tb427_000831000.1-p1-CDS4	Tb427_000831000.1	unitig_320_Tb427v10	Tb927.9.14650	SLACS retrotransposable element (part)	ZUnknown	hypothetical protein, conserved	27	-0.1066	NA	0	0.79	10.59	180	87	63	44	17	14	5	2.53	2.26	1.24	1.93	1.8	0.71	Tb927.9.14650,Tb927.9.14660,Tb927.9.14940	2.32481	1.4489
Tb427_000666800.1-p1-CDS1	Tb427_000666800.1	unitig_1881_Tb427v10	#N/A	#N/A	#N/A	#N/A	23	-0.1146	NA	0	0.67	42	462	66	44	68	11	12	4	1.92	1.58	1.92	1.25	1.55	0.57	#N/A	1.0072	1.45418
Tb427_000389200.1-p1-CDS6	Tb427_000389200.1	Chr6_3A_Tb427v10	Tb05.5K5.350	ESAG3 pseudogene	ESAG.pseudo	hypothetical protein	27	-0.0589	NA	0	0.87	102.86	720	67	70	85	7	15	6	1.95	2.51	2.4	0.79	1.93	0.85	Tb05.5K5.350,Tb05.5K5.420,Tb05.5K5.500,Tb08.27P2.160,Tb08.27P2.250,Tb08.27P2.330,Tb08.27P2.400,Tb08.27P2.520,Tb09.v4.0024,Tb09.v4.0027,Tb09.v4.0033,Tb09.v4.0045,Tb09.v4.0062,Tb09.v4.0083,Tb09.v4.0100,Tb09.v4.0115,Tb09.v4.0130,Tb09.v4.0132,Tb09.v4.0154,Tb09.v4.0160,Tb09.v4.0172,Tb09.v4.0181,Tb09.v4.0201,Tb09.v4.0206,Tb10.v4.0057,Tb10.v4.0066,Tb10.v4.0074,Tb10.v4.0090,Tb10.v4.0101,Tb10.v4.0137,Tb10…	1.31615	1.45418
Tb427_000809400.1-p1-CDS5	Tb427_000809400.1	unitig_284_Tb427v10	Tb927.2.300	DNA-directed RNA polymerase, pseudogene	Pseudogene	RNA polymerase Rpb2, domain 4/RNA polymerase Rpb2, domain 6	26	0.1535	NA	0	1.09	2.33	21	57	38	77	9	17	9	1.66	1.36	2.17	1.02	2.19	1.28	Tb927.2.300,Tb927.2.420,Tb927.2.460,Tb927.2.540,Tb927.4.230,Tb927.6.5190	1.58496	1.45418
Tb427_000781100.1-p1-CDS2	Tb427_000781100.1	unitig_2490_Tb427v10	Tb927.11.17840	retrotransposon hot spot protein (RHS, pseudogene)	RHS	Retrotransposon hot spot protein	23	-0.0985	NA	0	0.72	30.17	181	66	49	89	6	10	7	1.92	1.76	2.51	0.68	1.29	1	Tb927.11.17840,Tb927.2.720,Tb927.2.980,Tb927.4.190,Tb927.5.160	1.85997	1.45418
Tb427_000675600.1-p1-CDS1	Tb427_000675600.1	unitig_1902_Tb427v10	Tb09.v4.0013	retrotransposon hot spot (RHS) protein	RHS	Retrotransposon hot spot protein	26	0.0277	NA	0	0.97	64.57	452	51	65	85	7	13	10	1.48	2.33	2.4	0.79	1.68	1.42	Tb09.v4.0013,Tb09.v4.0067,Tb11.0820,Tb11.1780,Tb11.v5.0214,Tb11.v5.0294,Tb11.v5.0295,Tb11.v5.0325,Tb11.v5.0326,Tb11.v5.0353,Tb11.v5.0489,Tb11.v5.0532,Tb11.v5.0533,Tb11.v5.0594,Tb11.v5.0624,Tb11.v5.0670,Tb11.v5.0693,Tb11.v5.0839,Tb927.1.120,Tb927.1.180,Tb927.1.190,Tb927.1.220,Tb927.1.70,Tb927.1.90,Tb927.10.110,Tb927.10.70,Tb927.2.100,Tb927.2.1120,Tb927.2.1180,Tb927.2.1210,Tb927.2.270,Tb927.2.280,T…	1.40054	1.45943
Tb427_000695700.1-p1-CDS2	Tb427_000695700.1	unitig_1976_Tb427v10	Tb10.v4.0215	hypothetical protein	ZUnknown	hypothetical protein, conserved	24	-0.1372	NA	0	0.72	22.56	203	71	56	77	9	8	9	2.06	2.01	2.17	1.02	1.03	1.28	Tb10.v4.0215,Tb927.9.15820	1.29866	1.46467
Tb427_000671800.1-p1-CDS4	Tb427_000671800.1	unitig_1897_Tb427v10	Tb927.2.300	DNA-directed RNA polymerase, pseudogene	Pseudogene	RNA polymerase Rpb2, domain 4	25	-0.2264	NA	0	0.63	45.08	586	85	61	61	13	8	7	2.47	2.19	1.72	1.48	1.03	1	Tb927.2.300,Tb927.2.420,Tb927.2.460,Tb927.2.540,Tb927.4.230,Tb927.6.5190	1.39506	1.46467
Tb427_000108200.1-p1-CDS1	Tb427_000108200.1	Chr10_5A_Tb427v10	Tb07.30D13.180	hypothetical protein, conserved (pseudogene)	Pseudogene	hypothetical protein	24	-0.0503	NA	0	0.76	135.21	1893	69	40	57	14	9	9	2.01	1.44	1.61	1.59	1.16	1.28	Tb07.30D13.180,Tb07.30D13.80	2.25701	1.46467
Tb427_000759700.1-p1-CDS1	Tb427_000759700.1	unitig_2335_Tb427v10	Tb11.1800	retrotransposon hot spot protein (RHS, pseudogene)	RHS	Retrotransposon hot spot protein	20	-0.1494	NA	0	0.55	75.09	826	45	45	69	11	6	7	1.31	1.62	1.95	1.25	0.77	1	Tb11.1800,Tb11.v5.0442	1.37851	1.46989
Tb427_000333900.1-p1-CDS1	Tb427_000333900.1	Chr4_3A_Tb427v10	Tb11.v5.1020	retrotransposon hot spot (RHS) protein	RHS	Endonuclease-reverse transcriptase	27	-0.0445	NA	0	0.9	28.83	346	75	59	65	12	9	12	2.18	2.12	1.84	1.36	1.16	1.71	Tb11.v5.1020,Tb927.1.240,Tb927.1.500,Tb927.10.16200,Tb927.11.18610,Tb927.11.18630	1.774	1.46989
Tb427_000772900.1-p1-CDS4	Tb427_000772900.1	unitig_2457_Tb427v10	Tb11.v5.1020	retrotransposon hot spot (RHS) protein	RHS	Reverse transcriptase (RNA-dependent DNA polymerase)	25	-0.2439	NA	0	0.6	9.71	136	82	63	57	14	6	8	2.38	2.26	1.61	1.59	0.77	1.14	Tb11.v5.1020,Tb927.1.240,Tb927.1.500,Tb927.10.16200,Tb927.11.18610,Tb927.11.18630	2.22342	1.46989
Tb427_000333100.1-p1-CDS3	Tb427_000333100.1	Chr4_3A_Tb427v10	Tb11.v5.1020	retrotransposon hot spot (RHS) protein	RHS	Reverse transcriptase (RNA-dependent DNA polymerase)	22	-0.0489	NA	0	0.68	22.4	336	52	36	53	15	8	8	1.51	1.29	1.5	1.7	1.03	1.14	Tb11.v5.1020,Tb927.1.240,Tb927.1.500,Tb927.10.16200,Tb927.11.18610,Tb927.11.18630	1.39506	1.47508
Tb427_000276100.1-p1-CDS1	Tb427_000276100.1	Chr1_5B_Tb427v10	Tb927.1.320	retrotransposon hot spot protein (RHS, pseudogene)	RHS	hypothetical protein, conserved	24	-0.0135	NA	0	0.81	33.2	498	55	49	53	15	9	10	1.6	1.76	1.5	1.7	1.16	1.42	Tb927.1.320,Tb927.1.330	1.58015	1.47508
Tb427_000113100.1-p1-CDS4	Tb427_000113100.1	Chr11_3A_Tb427v10	Tb927.11.18620	variant surface glycoprotein (VSG)	VSG	hypothetical protein, conserved	21	-0.2766	NA	0	0.43	20.67	248	64	44	65	12	3	7	1.86	1.58	1.84	1.36	0.39	1	Tb927.11.18620,Tb927.11.19850	1.62293	1.47508
Tb427_000674900.1-p1-CDS1	Tb427_000674900.1	unitig_1900_Tb427v10	Tb11.v5.0655	trypanosome RHS family	ZUnknown	Retrotransposon hot spot protein	29	0.2136	NA	0	1.33	91.75	734	68	48	81	8	12	19	1.98	1.72	2.29	0.91	1.55	2.7	Tb11.v5.0655,Tb927.1.430,Tb927.1.450,Tb927.2.1140,Tb927.2.830,Tb927.4.110	1.67356	1.47508
Tb427_030025400.1-p1-CDS1	Tb427_030025400.1	Chr3_core_Tb427v10	Tb927.3.2550	hypothetical protein, conserved	ZUnknown	hypothetical protein, conserved	22	0.0341	NA	0	0.78	9.25	111	38	36	65	12	16	3	1.11	1.29	1.84	1.36	2.06	0.43	Tb927.3.2550,Tb927.3.2560,Tb927.3.2570	1.96347	1.47508
Tb427_000697000.1-p1-CDS4	Tb427_000697000.1	unitig_1986_Tb427v10	Tb05.5K5.180	GRESAG 4 receptor-type adenylate cyclase	GRESAG	Adenylate and Guanylate cyclase catalytic domain containing protein	22	-0.1092	NA	0	0.63	15.2	228	57	42	54	15	8	7	1.66	1.51	1.52	1.7	1.03	1	Tb05.5K5.180,Tb05.5K5.190,Tb09.v4.0009,Tb11.v5.0209,Tb11.v5.0217,Tb11.v5.0281,Tb11.v5.0379,Tb11.v5.0380,Tb11.v5.0424,Tb11.v5.0425,Tb11.v5.0429,Tb11.v5.0431,Tb11.v5.0456,Tb11.v5.0470,Tb11.v5.0484,Tb11.v5.0546,Tb11.v5.0576,Tb11.v5.0654,Tb11.v5.0784,Tb11.v5.0821,Tb11.v5.0830,Tb11.v5.0864,Tb11.v5.0865,Tb11.v5.1015,Tb11.v5.1016,Tb927.10.13040,Tb927.10.16000,Tb927.10.16190,Tb927.10.2430,Tb927.11.13740,…	2.12433	1.47508
Tb427_000740700.1-p1-CDS4	Tb427_000740700.1	unitig_2222_Tb427v10	Tb09.v4.0041	leucine-rich repeat protein LRRP, pseudogene	LRRP	Leucine Rich repeat	25	-0.2127	NA	0	0.62	12.38	99	84	59	82	8	11	4	2.44	2.12	2.31	0.91	1.42	0.57	Tb09.v4.0041,Tb11.v5.0448,Tb11.v5.0551,Tb11.v5.0560,Tb11.v5.0602,Tb11.v5.0703,Tb11.v5.0838,Tb927.1.290,Tb927.1.370,Tb927.1.480,Tb927.11.1500,Tb927.11.1510,Tb927.2.1310,Tb927.2.170,Tb927.2.690,Tb927.2.950,Tb927.3.1490,Tb927.4.160,Tb927.6.130,Tb927.7.7540,Tb927.9.14540	2.22959	1.47508
Tb427_030035400.1-p1-CDS8	Tb427_030035400.1	Chr3_core_Tb427v10	Tb11.v5.1020	retrotransposon hot spot (RHS) protein	RHS	hypothetical protein, conserved	22	0.0066	NA	0	0.75	33	396	41	40	66	12	10	8	1.19	1.44	1.86	1.36	1.29	1.14	Tb11.v5.1020,Tb927.1.240,Tb927.1.500,Tb927.10.16200,Tb927.11.18610,Tb927.11.18630	1.21412	1.48543
Tb427_000616100.1-p1-CDS1	Tb427_000616100.1	Chr9_5A_Tb427v10	Tb11.v5.1020	retrotransposon hot spot (RHS) protein	RHS	Reverse transcriptase (RNA-dependent DNA polymerase)	28	0.1681	NA	0	1.13	23.2	348	64	45	54	15	16	11	1.86	1.62	1.52	1.7	2.06	1.57	Tb11.v5.1020,Tb927.1.240,Tb927.1.500,Tb927.10.16200,Tb927.11.18610,Tb927.11.18630	1.45418	1.48543
Tb427_000830800.1-p1-CDS2	Tb427_000830800.1	unitig_317_Tb427v10	Tb10.v4.0215	hypothetical protein	ZUnknown	hypothetical protein, conserved	25	-0.4111	NA	0	0.37	19.88	159	91	83	82	8	7	2	2.65	2.98	2.31	0.91	0.9	0.28	Tb10.v4.0215,Tb927.9.15820	1.61353	1.48543
Tb427_000691500.1-p1-CDS5	Tb427_000691500.1	unitig_1962_Tb427v10	Tb10.v4.0215	hypothetical protein	ZUnknown	hypothetical protein, conserved	28	-0.0874	NA	0	0.89	31.78	286	94	59	78	9	9	12	2.73	2.12	2.2	1.02	1.16	1.71	Tb10.v4.0215,Tb927.9.15820	1.89918	1.48543
Tb427_090078700.1-p1-CDS2	Tb427_090078700.1	Chr9_core_Tb427v10	Tb927.4.5090	hypothetical protein	ZUnknown	hypothetical protein	19	-0.1711	NA	0	0.48	2.25	27	53	31	66	12	3	8	1.54	1.11	1.86	1.36	0.39	1.14	Tb927.4.5090	1.46989	1.4957
Tb427_000749300.1-p1-CDS1	Tb427_000749300.1	unitig_224_Tb427v10	Tb927.9.15740	hypothetical protein, conserved	ZUnknown	hypothetical protein, conserved	22	-0.0679	NA	0	0.66	2	24	56	35	66	12	10	6	1.63	1.26	1.86	1.36	1.29	0.85	Tb927.9.15740,Tb927.9.15770,Tb927.9.15800	1.56071	1.4957
Tb427_000108600.1-p1-CDS1	Tb427_000108600.1	Chr10_5B_Tb427v10	Tb09.v4.0065	ESAG1	ESAG	ESAG protein	25	-0.099	NA	0	0.75	2.82	31	68	53	70	11	10	8	1.98	1.9	1.98	1.25	1.29	1.14	Tb09.v4.0065,Tb10.v4.0213,Tb10.v4.0218,Tb11.1020,Tb927.1.5200,Tb927.1.5240,Tb927.10.20,Tb927.11.17890,Tb927.11.18650,Tb927.4.1200,Tb927.9.660,Tb927.9.7350	1.774	1.4957
Tb427_000832300.1-p1-CDS2	Tb427_000832300.1	unitig_376_Tb427v10	Tb05.5K5.180	GRESAG 4 receptor-type adenylate cyclase	GRESAG	Adenylate and Guanylate cyclase catalytic domain containing protein	33	0.1551	NA	0	1.37	32.5	325	100	57	74	10	22	11	2.91	2.05	2.09	1.14	2.84	1.57	Tb05.5K5.180,Tb05.5K5.190,Tb09.v4.0009,Tb11.v5.0209,Tb11.v5.0217,Tb11.v5.0281,Tb11.v5.0379,Tb11.v5.0380,Tb11.v5.0424,Tb11.v5.0425,Tb11.v5.0429,Tb11.v5.0431,Tb11.v5.0456,Tb11.v5.0470,Tb11.v5.0484,Tb11.v5.0546,Tb11.v5.0576,Tb11.v5.0654,Tb11.v5.0784,Tb11.v5.0821,Tb11.v5.0830,Tb11.v5.0864,Tb11.v5.0865,Tb11.v5.1015,Tb11.v5.1016,Tb927.10.13040,Tb927.10.16000,Tb927.10.16190,Tb927.10.2430,Tb927.11.13740,…	1.89142	1.4957
Tb427_000688800.1-p1-CDS1	Tb427_000688800.1	unitig_1930_Tb427v10	Tb09.v4.0013	retrotransposon hot spot (RHS) protein	RHS	Retrotransposon hot spot protein	24	-0.2184	NA	0	0.59	41.15	535	80	50	62	13	7	7	2.33	1.8	1.75	1.48	0.9	1	Tb09.v4.0013,Tb09.v4.0067,Tb11.0820,Tb11.1780,Tb11.v5.0214,Tb11.v5.0294,Tb11.v5.0295,Tb11.v5.0325,Tb11.v5.0326,Tb11.v5.0353,Tb11.v5.0489,Tb11.v5.0532,Tb11.v5.0533,Tb11.v5.0594,Tb11.v5.0624,Tb11.v5.0670,Tb11.v5.0693,Tb11.v5.0839,Tb927.1.120,Tb927.1.180,Tb927.1.190,Tb927.1.220,Tb927.1.70,Tb927.1.90,Tb927.10.110,Tb927.10.70,Tb927.2.100,Tb927.2.1120,Tb927.2.1180,Tb927.2.1210,Tb927.2.270,Tb927.2.280,T…	1.3505	1.5008
Tb427_000654700.1-p1-CDS1	Tb427_000654700.1	unitig_1853_Tb427v10	Tb09.v4.0013	retrotransposon hot spot (RHS) protein	RHS	Retrotransposon hot spot protein	22	-0.0404	NA	0	0.68	45.75	732	47	38	50	16	6	10	1.37	1.36	1.41	1.82	0.77	1.42	Tb09.v4.0013,Tb09.v4.0067,Tb11.0820,Tb11.1780,Tb11.v5.0214,Tb11.v5.0294,Tb11.v5.0295,Tb11.v5.0325,Tb11.v5.0326,Tb11.v5.0353,Tb11.v5.0489,Tb11.v5.0532,Tb11.v5.0533,Tb11.v5.0594,Tb11.v5.0624,Tb11.v5.0670,Tb11.v5.0693,Tb11.v5.0839,Tb927.1.120,Tb927.1.180,Tb927.1.190,Tb927.1.220,Tb927.1.70,Tb927.1.90,Tb927.10.110,Tb927.10.70,Tb927.2.100,Tb927.2.1120,Tb927.2.1180,Tb927.2.1210,Tb927.2.270,Tb927.2.280,T…	1.59932	1.5008
Tb427_000829100.1-p1-CDS2	Tb427_000829100.1	unitig_316_Tb427v10	Tb927.9.780	hypothetical protein	ZUnknown	hypothetical protein, conserved	31	-0.1269	NA	0	0.93	8.8	88	100	85	74	10	9	13	2.91	3.05	2.09	1.14	1.16	1.85	Tb927.9.780	1.62293	1.5008
Tb427_030025600.1-p1-CDS1	Tb427_030025600.1	Chr3_core_Tb427v10	Tb927.3.2550	hypothetical protein, conserved	ZUnknown	hypothetical protein, conserved	25	0.1311	NA	0	1.01	11.1	111	53	36	74	10	13	11	1.54	1.29	2.09	1.14	1.68	1.57	Tb927.3.2550,Tb927.3.2560,Tb927.3.2570	1.87971	1.5008
Tb427_000741500.1-p1-CDS2	Tb427_000741500.1	unitig_2222_Tb427v10	Tb09.v4.0066	hypothetical protein	ZUnknown	hypothetical protein, conserved	24	0.1131	NA	0	0.93	18.06	289	29	43	50	16	10	12	0.84	1.54	1.41	1.82	1.29	1.71	Tb09.v4.0066,Tb927.1.110	2.12102	1.5008
Tb427_000812800.1-p1-CDS2	Tb427_000812800.1	unitig_2977_Tb427v10	Tb05.5K5.350	ESAG3 pseudogene	ESAG.pseudo	hypothetical protein, conserved	25	-0.3006	NA	0	0.54	10	90	83	69	79	9	8	5	2.41	2.48	2.23	1.02	1.03	0.71	Tb05.5K5.350,Tb05.5K5.420,Tb05.5K5.500,Tb08.27P2.160,Tb08.27P2.250,Tb08.27P2.330,Tb08.27P2.400,Tb08.27P2.520,Tb09.v4.0024,Tb09.v4.0027,Tb09.v4.0033,Tb09.v4.0045,Tb09.v4.0062,Tb09.v4.0083,Tb09.v4.0100,Tb09.v4.0115,Tb09.v4.0130,Tb09.v4.0132,Tb09.v4.0154,Tb09.v4.0160,Tb09.v4.0172,Tb09.v4.0181,Tb09.v4.0201,Tb09.v4.0206,Tb10.v4.0057,Tb10.v4.0066,Tb10.v4.0074,Tb10.v4.0090,Tb10.v4.0101,Tb10.v4.0137,Tb10…	1.5008	1.50589
Tb427_000780200.1-p1-CDS1	Tb427_000780200.1	unitig_2489_Tb427v10	Tb05.5K5.180	GRESAG 4 receptor-type adenylate cyclase	GRESAG	Adenylate and Guanylate cyclase catalytic domain containing protein	30	0.1575	NA	0	1.21	33.09	364	76	52	71	11	14	15	2.21	1.87	2	1.25	1.8	2.13	Tb05.5K5.180,Tb05.5K5.190,Tb09.v4.0009,Tb11.v5.0209,Tb11.v5.0217,Tb11.v5.0281,Tb11.v5.0379,Tb11.v5.0380,Tb11.v5.0424,Tb11.v5.0425,Tb11.v5.0429,Tb11.v5.0431,Tb11.v5.0456,Tb11.v5.0470,Tb11.v5.0484,Tb11.v5.0546,Tb11.v5.0576,Tb11.v5.0654,Tb11.v5.0784,Tb11.v5.0821,Tb11.v5.0830,Tb11.v5.0864,Tb11.v5.0865,Tb11.v5.1015,Tb11.v5.1016,Tb927.10.13040,Tb927.10.16000,Tb927.10.16190,Tb927.10.2430,Tb927.11.13740,…	1.51096	1.50589
Tb427_000347600.1-p1-CDS5	Tb427_000347600.1	Chr4_5B_Tb427v10	Tb05.5K5.180	GRESAG 4 receptor-type adenylate cyclase	GRESAG	Adenylate and Guanylate cyclase catalytic domain containing protein	26	0.0228	NA	0	0.93	19.5	234	66	50	67	12	9	13	1.92	1.8	1.89	1.36	1.16	1.85	Tb05.5K5.180,Tb05.5K5.190,Tb09.v4.0009,Tb11.v5.0209,Tb11.v5.0217,Tb11.v5.0281,Tb11.v5.0379,Tb11.v5.0380,Tb11.v5.0424,Tb11.v5.0425,Tb11.v5.0429,Tb11.v5.0431,Tb11.v5.0456,Tb11.v5.0470,Tb11.v5.0484,Tb11.v5.0546,Tb11.v5.0576,Tb11.v5.0654,Tb11.v5.0784,Tb11.v5.0821,Tb11.v5.0830,Tb11.v5.0864,Tb11.v5.0865,Tb11.v5.1015,Tb11.v5.1016,Tb927.10.13040,Tb927.10.16000,Tb927.10.16190,Tb927.10.2430,Tb927.11.13740,…	1.51602	1.50589
Tb427_000689000.1-p1-CDS2	Tb427_000689000.1	unitig_1930_Tb427v10	Tb927.2.300	DNA-directed RNA polymerase, pseudogene	Pseudogene	RNA polymerase Rpb2, domain 4	31	-0.0454	NA	0	1.01	13.67	164	116	56	67	12	10	14	3.37	2.01	1.89	1.36	1.29	1.99	Tb927.2.300,Tb927.2.420,Tb927.2.460,Tb927.2.540,Tb927.4.230,Tb927.6.5190	1.57046	1.50589
Tb427_000742300.1-p1-CDS1	Tb427_000742300.1	unitig_2223_Tb427v10	Tb927.2.300	DNA-directed RNA polymerase, pseudogene	Pseudogene	RNA polymerase Rpb2, domain 4/RNA polymerase Rpb2, domain 6	28	0.0497	NA	0	1.01	60.5	726	73	52	67	12	11	13	2.12	1.87	1.89	1.36	1.42	1.85	Tb927.2.300,Tb927.2.420,Tb927.2.460,Tb927.2.540,Tb927.4.230,Tb927.6.5190	1.57046	1.50589
Tb427_000649100.1-p1-CDS1	Tb427_000649100.1	unitig_1842_Tb427v10	Tb927.11.17840	retrotransposon hot spot protein (RHS, pseudogene)	RHS	Retrotransposon hot spot protein	26	-0.1704	NA	0	0.7	22.29	156	81	63	87	7	10	7	2.36	2.26	2.46	0.79	1.29	1	Tb927.11.17840,Tb927.2.720,Tb927.2.980,Tb927.4.190,Tb927.5.160	1.57531	1.50589
Tb427_000794300.1-p1-CDS1	Tb427_000794300.1	unitig_2569_Tb427v10	Tb09.v4.0013	retrotransposon hot spot (RHS) protein	RHS	Retrotransposon hot spot protein	24	-0.0914	NA	0	0.71	21.08	253	58	50	67	12	8	9	1.69	1.8	1.89	1.36	1.03	1.28	Tb09.v4.0013,Tb09.v4.0067,Tb11.0820,Tb11.1780,Tb11.v5.0214,Tb11.v5.0294,Tb11.v5.0295,Tb11.v5.0325,Tb11.v5.0326,Tb11.v5.0353,Tb11.v5.0489,Tb11.v5.0532,Tb11.v5.0533,Tb11.v5.0594,Tb11.v5.0624,Tb11.v5.0670,Tb11.v5.0693,Tb11.v5.0839,Tb927.1.120,Tb927.1.180,Tb927.1.190,Tb927.1.220,Tb927.1.70,Tb927.1.90,Tb927.10.110,Tb927.10.70,Tb927.2.100,Tb927.2.1120,Tb927.2.1180,Tb927.2.1210,Tb927.2.270,Tb927.2.280,T…	1.58496	1.50589
Tb427_000677900.1-p1-CDS6	Tb427_000677900.1	unitig_1904_Tb427v10	Tb11.1790	retrotransposon hot spot protein (RHS, pseudogene)	RHS	Retrotransposon hot spot protein	23	-0.0493	NA	0	0.73	28	420	55	44	55	15	4	13	1.6	1.58	1.55	1.7	0.52	1.85	Tb11.1790,Tb11.v5.0567,Tb11.v5.0713,Tb927.1.420,Tb927.2.1080,Tb927.2.1170,Tb927.2.240,Tb927.4.250,Tb927.6.140	1.58496	1.50589
Tb427_000722900.1-p1-CDS3	Tb427_000722900.1	unitig_2169_Tb427v10	Tb10.v4.0215	hypothetical protein	ZUnknown	hypothetical protein, conserved	35	0.1942	NA	0	1.53	33.88	271	104	67	83	8	22	15	3.02	2.41	2.34	0.91	2.84	2.13	Tb10.v4.0215,Tb927.9.15820	1.64155	1.50589
Tb427_000680800.1-p1-CDS1	Tb427_000680800.1	unitig_1910_Tb427v10	Tb10.v4.0221	hypothetical protein	ZUnknown	hypothetical protein, conserved	25	-0.2973	NA	0	0.54	9.67	87	89	63	79	9	8	5	2.59	2.26	2.23	1.02	1.03	0.71	Tb10.v4.0221	1.76553	1.50589
Tb427_000737300.1-p1-CDS2	Tb427_000737300.1	unitig_2217_Tb427v10	Tb05.5K5.180	GRESAG 4 receptor-type adenylate cyclase	GRESAG	hypothetical protein, conserved	27	0.1878	NA	0	1.15	17.7	177	54	47	75	10	17	11	1.57	1.69	2.12	1.14	2.19	1.57	Tb05.5K5.180,Tb05.5K5.190,Tb09.v4.0009,Tb11.v5.0209,Tb11.v5.0217,Tb11.v5.0281,Tb11.v5.0379,Tb11.v5.0380,Tb11.v5.0424,Tb11.v5.0425,Tb11.v5.0429,Tb11.v5.0431,Tb11.v5.0456,Tb11.v5.0470,Tb11.v5.0484,Tb11.v5.0546,Tb11.v5.0576,Tb11.v5.0654,Tb11.v5.0784,Tb11.v5.0821,Tb11.v5.0830,Tb11.v5.0864,Tb11.v5.0865,Tb11.v5.1015,Tb11.v5.1016,Tb927.10.13040,Tb927.10.16000,Tb927.10.16190,Tb927.10.2430,Tb927.11.13740,…	1.81147	1.50589
Tb427_000818600.1-p1-CDS1	Tb427_000818600.1	unitig_3033_Tb427v10	Tb09.v4.0013	retrotransposon hot spot (RHS) protein	RHS	Retrotransposon hot spot protein	28	-0.1405	NA	0	0.83	67.6	676	92	70	75	10	10	10	2.68	2.51	2.12	1.14	1.29	1.42	Tb09.v4.0013,Tb09.v4.0067,Tb11.0820,Tb11.1780,Tb11.v5.0214,Tb11.v5.0294,Tb11.v5.0295,Tb11.v5.0325,Tb11.v5.0326,Tb11.v5.0353,Tb11.v5.0489,Tb11.v5.0532,Tb11.v5.0533,Tb11.v5.0594,Tb11.v5.0624,Tb11.v5.0670,Tb11.v5.0693,Tb11.v5.0839,Tb927.1.120,Tb927.1.180,Tb927.1.190,Tb927.1.220,Tb927.1.70,Tb927.1.90,Tb927.10.110,Tb927.10.70,Tb927.2.100,Tb927.2.1120,Tb927.2.1180,Tb927.2.1210,Tb927.2.270,Tb927.2.280,T…	2.01792	1.50589
Tb427_020007200.1-p1-CDS3	Tb427_020007200.1	Chr2_core_Tb427v10	Tb11.v5.1020	retrotransposon hot spot (RHS) protein	RHS	Reverse transcriptase (RNA-dependent DNA polymerase)	31	-0.023	NA	0	1.03	9.31	121	100	66	63	13	14	11	2.91	2.37	1.78	1.48	1.8	1.57	Tb11.v5.1020,Tb927.1.240,Tb927.1.500,Tb927.10.16200,Tb927.11.18610,Tb927.11.18630	2.03914	1.50589
Tb427_000821500.1-p1-CDS1	Tb427_000821500.1	unitig_3076_Tb427v10	Tb09.v4.0013	retrotransposon hot spot (RHS) protein	RHS	Retrotransposon hot spot protein	20	-0.0673	NA	0	0.59	22.38	358	42	32	51	16	6	8	1.22	1.15	1.44	1.82	0.77	1.14	Tb09.v4.0013,Tb09.v4.0067,Tb11.0820,Tb11.1780,Tb11.v5.0214,Tb11.v5.0294,Tb11.v5.0295,Tb11.v5.0325,Tb11.v5.0326,Tb11.v5.0353,Tb11.v5.0489,Tb11.v5.0532,Tb11.v5.0533,Tb11.v5.0594,Tb11.v5.0624,Tb11.v5.0670,Tb11.v5.0693,Tb11.v5.0839,Tb927.1.120,Tb927.1.180,Tb927.1.190,Tb927.1.220,Tb927.1.70,Tb927.1.90,Tb927.10.110,Tb927.10.70,Tb927.2.100,Tb927.2.1120,Tb927.2.1180,Tb927.2.1210,Tb927.2.270,Tb927.2.280,T…	2.43563	1.50589
Tb427_000785900.1-p1-CDS1	Tb427_000785900.1	unitig_2501_Tb427v10	Tb11.v5.0349	DNA-directed RNA polymerase II subunit 2	RNA.synthesis	RNA polymerase Rpb2, domain 6	32	0.0408	NA	0	1.15	90.3	903	90	72	75	10	17	11	2.62	2.59	2.12	1.14	2.19	1.57	Tb11.v5.0349,Tb927.1.100,Tb927.2.1110,Tb927.2.1200,Tb927.2.490	1.28096	1.51602
Tb427_000515900.1-p1-CDS5	Tb427_000515900.1	Chr8_5A_Tb427v10	Tb11.v5.0985	variant surface glycoprotein (VSG)-related	VSG	Trypanosomal VSG domain containing protein	26	-0.0021	NA	0	0.92	2.2	22	66	56	75	10	11	11	1.92	2.01	2.12	1.14	1.42	1.57	Tb11.v5.0985,Tb927.5.130	1.39506	1.51602
Tb427_000780200.1-p1-CDS5	Tb427_000780200.1	unitig_2489_Tb427v10	Tb05.5K5.180	GRESAG 4 receptor-type adenylate cyclase	GRESAG	Adenylate and Guanylate cyclase catalytic domain containing protein	28	0.144	NA	0	1.11	20.27	223	59	53	72	11	15	12	1.72	1.9	2.03	1.25	1.93	1.71	Tb05.5K5.180,Tb05.5K5.190,Tb09.v4.0009,Tb11.v5.0209,Tb11.v5.0217,Tb11.v5.0281,Tb11.v5.0379,Tb11.v5.0380,Tb11.v5.0424,Tb11.v5.0425,Tb11.v5.0429,Tb11.v5.0431,Tb11.v5.0456,Tb11.v5.0470,Tb11.v5.0484,Tb11.v5.0546,Tb11.v5.0576,Tb11.v5.0654,Tb11.v5.0784,Tb11.v5.0821,Tb11.v5.0830,Tb11.v5.0864,Tb11.v5.0865,Tb11.v5.1015,Tb11.v5.1016,Tb927.10.13040,Tb927.10.16000,Tb927.10.16190,Tb927.10.2430,Tb927.11.13740,…	1.58496	1.51602
Tb427_000655800.1-p1-CDS1	Tb427_000655800.1	unitig_1853_Tb427v10	Tb09.v4.0041	leucine-rich repeat protein LRRP, pseudogene	LRRP	hypothetical protein, conserved	26	-0.0213	NA	0	0.88	45.18	497	62	58	72	11	9	12	1.8	2.08	2.03	1.25	1.16	1.71	Tb09.v4.0041,Tb11.v5.0448,Tb11.v5.0551,Tb11.v5.0560,Tb11.v5.0602,Tb11.v5.0703,Tb11.v5.0838,Tb927.1.290,Tb927.1.370,Tb927.1.480,Tb927.11.1500,Tb927.11.1510,Tb927.2.1310,Tb927.2.170,Tb927.2.690,Tb927.2.950,Tb927.3.1490,Tb927.4.160,Tb927.6.130,Tb927.7.7540,Tb927.9.14540	2.05658	1.51602
Tb427_000779300.1-p1-CDS2	Tb427_000779300.1	unitig_2481_Tb427v10	Tb09.v4.0013	retrotransposon hot spot (RHS) protein	RHS	Retrotransposon hot spot protein	27	-0.0119	NA	0	0.95	23.5	141	66	68	92	6	11	12	1.92	2.44	2.6	0.68	1.42	1.71	Tb09.v4.0013,Tb09.v4.0067,Tb11.0820,Tb11.1780,Tb11.v5.0214,Tb11.v5.0294,Tb11.v5.0295,Tb11.v5.0325,Tb11.v5.0326,Tb11.v5.0353,Tb11.v5.0489,Tb11.v5.0532,Tb11.v5.0533,Tb11.v5.0594,Tb11.v5.0624,Tb11.v5.0670,Tb11.v5.0693,Tb11.v5.0839,Tb927.1.120,Tb927.1.180,Tb927.1.190,Tb927.1.220,Tb927.1.70,Tb927.1.90,Tb927.10.110,Tb927.10.70,Tb927.2.100,Tb927.2.1120,Tb927.2.1180,Tb927.2.1210,Tb927.2.270,Tb927.2.280,T…	2.10769	1.51602
Tb427_070075700.1-p1-CDS6	Tb427_070075700.1	Chr7_core_Tb427v10	Tb11.v5.1020	retrotransposon hot spot (RHS) protein	RHS	hypothetical protein, conserved	19	-0.0853	NA	0	0.53	11.33	136	28	38	68	12	7	6	0.81	1.36	1.92	1.36	0.9	0.85	Tb11.v5.1020,Tb927.1.240,Tb927.1.500,Tb927.10.16200,Tb927.11.18610,Tb927.11.18630	2.4489	1.51602
Tb427_000597500.1-p1-CDS1	Tb427_000597500.1	Chr9_3A_Tb427v10	Tb11.v5.1020	retrotransposon hot spot (RHS) protein	RHS	Endonuclease-reverse transcriptase	27	0.1629	NA	0	1.06	22.21	311	58	41	60	14	16	10	1.69	1.47	1.69	1.59	2.06	1.42	Tb11.v5.1020,Tb927.1.240,Tb927.1.500,Tb927.10.16200,Tb927.11.18610,Tb927.11.18630	1.34483	1.52105
Tb427_000333100.1-p1-CDS1	Tb427_000333100.1	Chr4_3A_Tb427v10	Tb11.v5.1020	retrotransposon hot spot (RHS) protein	RHS	Reverse transcriptase (RNA-dependent DNA polymerase)	28	-0.0184	NA	0	0.91	22.13	332	63	69	56	15	10	12	1.83	2.48	1.58	1.7	1.29	1.71	Tb11.v5.1020,Tb927.1.240,Tb927.1.500,Tb927.10.16200,Tb927.11.18610,Tb927.11.18630	1.46989	1.52105
Tb427_000781400.1-p1-CDS1	Tb427_000781400.1	unitig_2490_Tb427v10	Tb927.1.280	Protein of unknown function (DUF1181)	ZUnknown	Protein of unknown function (DUF1181)	26	-0.0935	NA	0	0.78	24.63	197	59	69	84	8	11	8	1.72	2.48	2.37	0.91	1.42	1.14	Tb927.1.280,Tb927.1.380,Tb927.1.470,Tb927.2.160,Tb927.2.680,Tb927.2.940,Tb927.4.150,Tb927.6.120,Tb927.7.7550	1.54102	1.52105
Tb427_000793100.1-p1-CDS1	Tb427_000793100.1	unitig_2569_Tb427v10	Tb927.9.780	hypothetical protein	ZUnknown	hypothetical protein, conserved	25	-0.2059	NA	0	0.66	6.56	59	81	62	80	9	9	7	2.36	2.23	2.26	1.02	1.16	1	Tb927.9.780	1.59932	1.52105
Tb427_000743200.1-p1-CDS2	Tb427_000743200.1	unitig_2223_Tb427v10	Tb927.5.294b	hypothetical protein	ZUnknown	hypothetical protein, conserved	28	-0.0529	NA	0	0.91	18.45	203	86	58	72	11	12	10	2.5	2.08	2.03	1.25	1.55	1.42	Tb927.5.294b	1.67807	1.52105
Tb427_090009600.1-p1-CDS1	Tb427_090009600.1	Chr9_core_Tb427v10	Tb11.v5.0655	trypanosome RHS family	ZUnknown	hypothetical protein, conserved	23	-0.22	NA	0	0.57	11.25	135	67	57	68	12	9	5	1.95	2.05	1.92	1.36	1.16	0.71	Tb11.v5.0655,Tb927.1.430,Tb927.1.450,Tb927.2.1140,Tb927.2.830,Tb927.4.110	1.68706	1.52105
Tb427_030034900.1-p1-CDS1	Tb427_030034900.1	Chr3_core_Tb427v10	Tb11.v5.0655	trypanosome RHS family	ZUnknown	Endonuclease-reverse transcriptase	27	0.1082	NA	0	1.03	30.17	362	51	56	68	12	13	12	1.48	2.01	1.92	1.36	1.68	1.71	Tb11.v5.0655,Tb927.1.430,Tb927.1.450,Tb927.2.1140,Tb927.2.830,Tb927.4.110	1.7137	1.52105
Tb427_000791500.1-p1-CDS5	Tb427_000791500.1	unitig_2565_Tb427v10	Tb10.v4.0215	hypothetical protein	ZUnknown	hypothetical protein, conserved	28	-0.2013	NA	0	0.7	12.43	174	107	59	60	14	9	8	3.11	2.12	1.69	1.59	1.16	1.14	Tb10.v4.0215,Tb927.9.15820	1.88753	1.52105
Tb427_000043300.1-p1-CDS3	Tb427_000043300.1	Chr10_3A_Tb427v10	Tb11.v5.1020	retrotransposon hot spot (RHS) protein	RHS	Reverse transcriptase (RNA-dependent DNA polymerase)	30	0.1627	NA	0	1.21	16.69	217	79	51	64	13	21	9	2.3	1.83	1.81	1.48	2.71	1.28	Tb11.v5.1020,Tb927.1.240,Tb927.1.500,Tb927.10.16200,Tb927.11.18610,Tb927.11.18630	2.09761	1.52105
Tb427_000705600.1-p1-CDS1	Tb427_000705600.1	unitig_2080_Tb427v10	Tb09.v4.0152	hypothetical protein	ZUnknown	hypothetical protein, conserved	20	-0.0996	NA	0	0.57	31.5	315	41	39	76	10	10	4	1.19	1.4	2.15	1.14	1.29	0.57	Tb09.v4.0152,Tb927.11.17830,Tb927.9.760	2.10434	1.52105
Tb427_090035000.1-p1-CDS2	Tb427_090035000.1	Chr9_core_Tb427v10	#N/A	#N/A	#N/A	#N/A	29	-0.0728	NA	0	0.88	1	13	96	62	64	13	18	4	2.79	2.23	1.81	1.48	2.32	0.57	#N/A	2.65306	1.52105
Tb427_000485400.1-p1-CDS1	Tb427_000485400.1	Chr8_3A_Tb427v10	Tb927.1.275	ESAG4 pseudogene	ESAG.pseudo	hypothetical protein, conserved	25	-0.0589	NA	0	0.82	47.14	330	72	52	89	7	12	8	2.09	1.87	2.51	0.79	1.55	1.14	Tb927.1.275,Tb927.2.1260,Tb927.4.130,Tb927.6.100	1.66448	1.52607
Tb427_000021600.1-p1-CDS1	Tb427_000021600.1	BES4_Tb427v10	Tb927.1.4900	ESAG11	ESAG	hypothetical protein, conserved	30	0.387	NA	0	1.49	65.65	1116	52	31	49	17	24	13	1.51	1.11	1.38	1.93	3.09	1.85	Tb927.1.4900,Tb927.1.5110,Tb927.3.5820	1.83188	1.52607
Tb427_000722100.1-p1-CDS1	Tb427_000722100.1	unitig_2166_Tb427v10	Tb927.1.275	ESAG4 pseudogene	ESAG.pseudo	hypothetical protein, conserved	29	0.2322	NA	0	1.3	33.67	303	69	44	81	9	20	12	2.01	1.58	2.29	1.02	2.58	1.71	Tb927.1.275,Tb927.2.1260,Tb927.4.130,Tb927.6.100	1.94486	1.52607
Tb427_000790800.1-p1-CDS1	Tb427_000790800.1	unitig_2565_Tb427v10	Tb927.1.275	ESAG4 pseudogene	ESAG.pseudo	Adenylate and Guanylate cyclase catalytic domain containing protein	28	0.0515	NA	0	1.01	29.18	321	69	58	73	11	17	8	2.01	2.08	2.06	1.25	2.19	1.14	Tb927.1.275,Tb927.2.1260,Tb927.4.130,Tb927.6.100	2.0036	1.52607
Tb427_000812400.1-p1-CDS2	Tb427_000812400.1	unitig_2969_Tb427v10	Tb05.5K5.350	ESAG3 pseudogene	ESAG.pseudo	hypothetical protein, conserved	26	-0.042	NA	0	0.82	16.47	247	72	51	57	15	9	11	2.09	1.83	1.61	1.7	1.16	1.57	Tb05.5K5.350,Tb05.5K5.420,Tb05.5K5.500,Tb08.27P2.160,Tb08.27P2.250,Tb08.27P2.330,Tb08.27P2.400,Tb08.27P2.520,Tb09.v4.0024,Tb09.v4.0027,Tb09.v4.0033,Tb09.v4.0045,Tb09.v4.0062,Tb09.v4.0083,Tb09.v4.0100,Tb09.v4.0115,Tb09.v4.0130,Tb09.v4.0132,Tb09.v4.0154,Tb09.v4.0160,Tb09.v4.0172,Tb09.v4.0181,Tb09.v4.0201,Tb09.v4.0206,Tb10.v4.0057,Tb10.v4.0066,Tb10.v4.0074,Tb10.v4.0090,Tb10.v4.0101,Tb10.v4.0137,Tb10…	1.71809	1.53107
Tb427_000701900.1-p1-CDS7	Tb427_000701900.1	unitig_2016_Tb427v10	Tb05.5K5.180	GRESAG 4 receptor-type adenylate cyclase	GRESAG	Adenylate and Guanylate cyclase catalytic domain containing protein	24	0.04	NA	0	0.82	12.41	211	53	37	49	17	11	9	1.54	1.33	1.38	1.93	1.42	1.28	Tb05.5K5.180,Tb05.5K5.190,Tb09.v4.0009,Tb11.v5.0209,Tb11.v5.0217,Tb11.v5.0281,Tb11.v5.0379,Tb11.v5.0380,Tb11.v5.0424,Tb11.v5.0425,Tb11.v5.0429,Tb11.v5.0431,Tb11.v5.0456,Tb11.v5.0470,Tb11.v5.0484,Tb11.v5.0546,Tb11.v5.0576,Tb11.v5.0654,Tb11.v5.0784,Tb11.v5.0821,Tb11.v5.0830,Tb11.v5.0864,Tb11.v5.0865,Tb11.v5.1015,Tb11.v5.1016,Tb927.10.13040,Tb927.10.16000,Tb927.10.16190,Tb927.10.2430,Tb927.11.13740,…	2.09761	1.53107
Tb427_000641800.1-p1-CDS3	Tb427_000641800.1	unitig_172_Tb427v10	Tb927.2.300	DNA-directed RNA polymerase, pseudogene	Pseudogene	RNA polymerase Rpb2, domain 4	26	-0.0681	NA	0	0.82	12.8	128	72	55	77	10	10	10	2.09	1.97	2.17	1.14	1.29	1.42	Tb927.2.300,Tb927.2.420,Tb927.2.460,Tb927.2.540,Tb927.4.230,Tb927.6.5190	2.33342	1.53605
Tb427_000674700.1-p1-CDS1	Tb427_000674700.1	unitig_1900_Tb427v10	Tb927.2.300	DNA-directed RNA polymerase, pseudogene	Pseudogene	RNA polymerase Rpb2, domain 4	28	-0.1338	NA	0	0.81	26.17	314	93	65	69	12	12	8	2.7	2.33	1.95	1.36	1.55	1.14	Tb927.2.300,Tb927.2.420,Tb927.2.460,Tb927.2.540,Tb927.4.230,Tb927.6.5190	1.79909	1.54102
Tb427_080083700.1-p1-CDS1	Tb427_080083700.1	Chr8_core_Tb427v10	Tb11.v5.1020	retrotransposon hot spot (RHS) protein	RHS	Endonuclease-reverse transcriptase	35	0.086	NA	0	1.32	13.1	131	93	85	77	10	14	18	2.7	3.05	2.17	1.14	1.8	2.56	Tb11.v5.1020,Tb927.1.240,Tb927.1.500,Tb927.10.16200,Tb927.11.18610,Tb927.11.18630	1.21412	1.54597
Tb427_000817800.1-p1-CDS1	Tb427_000817800.1	unitig_302_Tb427v10	Tb927.11.17840	retrotransposon hot spot protein (RHS, pseudogene)	RHS	Retrotransposon hot spot protein	20	-0.1209	NA	0	0.53	10.67	160	49	32	57	15	8	5	1.43	1.15	1.61	1.7	1.03	0.71	Tb927.11.17840,Tb927.2.720,Tb927.2.980,Tb927.4.190,Tb927.5.160	1.73985	1.5509
Tb427_090019600.1-p1-CDS2	Tb427_090019600.1	Chr9_core_Tb427v10	Tb927.9.3260	hypothetical protein, unlikely	Unlikely	hypothetical protein, conserved	31	0.2219	NA	0	1.27	1.67	25	70	52	57	15	14	17	2.04	1.87	1.61	1.7	1.8	2.42	Tb927.9.3260	1.7866	1.5509
Tb427_000271100.1-p1-CDS1	Tb427_000271100.1	Chr1_5A_Tb427v10	Tb927.1.280	Protein of unknown function (DUF1181)	ZUnknown	Protein of unknown function (DUF1181)	25	-0.0318	NA	0	0.82	19	190	60	52	77	10	10	10	1.75	1.87	2.17	1.14	1.29	1.42	Tb927.1.280,Tb927.1.380,Tb927.1.470,Tb927.2.160,Tb927.2.680,Tb927.2.940,Tb927.4.150,Tb927.6.120,Tb927.7.7550	1.89918	1.5509
Tb427_000701000.1-p1-CDS4	Tb427_000701000.1	unitig_2015_Tb427v10	Tb10.v4.0215	hypothetical protein	ZUnknown	hypothetical protein, conserved	27	-0.1772	NA	0	0.73	23.18	255	84	68	73	11	11	7	2.44	2.44	2.06	1.25	1.42	1	Tb10.v4.0215,Tb927.9.15820	1.65076	1.55582
Tb427_070024200.1-p1-CDS1	Tb427_070024200.1	Chr7_core_Tb427v10	Tb927.7.1940	hypothetical protein, T brucei-specific	ZUnknown	hypothetical protein, conserved	23	-0.1111	NA	0	0.62	1.29	22	59	42	49	17	7	8	1.72	1.51	1.38	1.93	0.9	1.14	Tb927.7.1940	1.66448	1.55582
Tb427_000832700.1-p1-CDS1	Tb427_000832700.1	unitig_376_Tb427v10	Tb08.27P2.460	variant surface glycoprotein (VSG)	VSG	hypothetical protein	24	-0.1176	NA	0	0.7	23.31	303	68	50	65	13	8	9	1.98	1.8	1.84	1.48	1.03	1.28	Tb08.27P2.460,Tb08.27P2.650,Tb08.27P2.720,Tb09.v4.0022,Tb09.v4.0055,Tb09.v4.0112,Tb09.v4.0141,Tb09.v4.0143,Tb09.v4.0195,Tb10.v4.0079,Tb10.v4.0112,Tb10.v4.0115,Tb10.v4.0148,Tb10.v4.0190,Tb10.v4.0193,Tb10.v4.0257,Tb11.0090,Tb11.0130,Tb11.0280,Tb11.0570,Tb11.57.0047,Tb11.57.0047b,Tb11.v5.0119,Tb11.v5.0123,Tb11.v5.1028,Tb927.11.17120,Tb927.11.17150,Tb927.11.17780,Tb927.11.19210,Tb927.11.19380,Tb927.1…	1.81147	1.55582
Tb427_000257500.1-p1-CDS3	Tb427_000257500.1	Chr1_3B_Tb427v10	Tb927.11.18620	variant surface glycoprotein (VSG)	VSG	hypothetical protein, conserved	31	0.0742	NA	0	1.15	33.15	431	89	63	65	13	12	16	2.59	2.26	1.84	1.48	1.55	2.28	Tb927.11.18620,Tb927.11.19850	1.9855	1.55582
Tb427_000791500.1-p1-CDS6	Tb427_000791500.1	unitig_2565_Tb427v10	Tb10.v4.0215	hypothetical protein	ZUnknown	hypothetical protein, conserved	23	-0.1208	NA	0	0.65	14	182	66	43	65	13	9	7	1.92	1.54	1.84	1.48	1.16	1	Tb10.v4.0215,Tb927.9.15820	2.20477	1.55582
Tb427_000792000.1-p1-CDS2	Tb427_000792000.1	unitig_2568_Tb427v10	Tb05.5K5.350	ESAG3 pseudogene	ESAG.pseudo	hypothetical protein, conserved	29	-0.0667	NA	0	0.94	10	90	87	70	82	9	12	11	2.53	2.51	2.31	1.02	1.55	1.57	Tb05.5K5.350,Tb05.5K5.420,Tb05.5K5.500,Tb08.27P2.160,Tb08.27P2.250,Tb08.27P2.330,Tb08.27P2.400,Tb08.27P2.520,Tb09.v4.0024,Tb09.v4.0027,Tb09.v4.0033,Tb09.v4.0045,Tb09.v4.0062,Tb09.v4.0083,Tb09.v4.0100,Tb09.v4.0115,Tb09.v4.0130,Tb09.v4.0132,Tb09.v4.0154,Tb09.v4.0160,Tb09.v4.0172,Tb09.v4.0181,Tb09.v4.0201,Tb09.v4.0206,Tb10.v4.0057,Tb10.v4.0066,Tb10.v4.0074,Tb10.v4.0090,Tb10.v4.0101,Tb10.v4.0137,Tb10…	3.03386	1.55582
Tb427_000659800.1-p1-CDS1	Tb427_000659800.1	unitig_1859_Tb427v10	Tb09.v4.0152	hypothetical protein	ZUnknown	hypothetical protein, conserved	25	0.0205	NA	0	0.89	18.67	168	51	56	82	9	13	9	1.48	2.01	2.31	1.02	1.68	1.28	Tb09.v4.0152,Tb927.11.17830,Tb927.9.760	1.19535	1.5656
Tb427_000794400.1-p1-CDS1	Tb427_000794400.1	unitig_2569_Tb427v10	Tb09.v4.0013	retrotransposon hot spot (RHS) protein	RHS	Retrotransposon hot spot protein	23	-0.383	NA	0	0.4	22.55	248	75	69	74	11	6	4	2.18	2.48	2.09	1.25	0.77	0.57	Tb09.v4.0013,Tb09.v4.0067,Tb11.0820,Tb11.1780,Tb11.v5.0214,Tb11.v5.0294,Tb11.v5.0295,Tb11.v5.0325,Tb11.v5.0326,Tb11.v5.0353,Tb11.v5.0489,Tb11.v5.0532,Tb11.v5.0533,Tb11.v5.0594,Tb11.v5.0624,Tb11.v5.0670,Tb11.v5.0693,Tb11.v5.0839,Tb927.1.120,Tb927.1.180,Tb927.1.190,Tb927.1.220,Tb927.1.70,Tb927.1.90,Tb927.10.110,Tb927.10.70,Tb927.2.100,Tb927.2.1120,Tb927.2.1180,Tb927.2.1210,Tb927.2.270,Tb927.2.280,T…	1.3505	1.5656
Tb427_000662600.1-p1-CDS1	Tb427_000662600.1	unitig_1870_Tb427v10	Tb09.v4.0013	retrotransposon hot spot (RHS) protein	RHS	Retrotransposon hot spot protein	22	-0.0152	NA	0	0.73	31	341	47	39	74	11	9	9	1.37	1.4	2.09	1.25	1.16	1.28	Tb09.v4.0013,Tb09.v4.0067,Tb11.0820,Tb11.1780,Tb11.v5.0214,Tb11.v5.0294,Tb11.v5.0295,Tb11.v5.0325,Tb11.v5.0326,Tb11.v5.0353,Tb11.v5.0489,Tb11.v5.0532,Tb11.v5.0533,Tb11.v5.0594,Tb11.v5.0624,Tb11.v5.0670,Tb11.v5.0693,Tb11.v5.0839,Tb927.1.120,Tb927.1.180,Tb927.1.190,Tb927.1.220,Tb927.1.70,Tb927.1.90,Tb927.10.110,Tb927.10.70,Tb927.2.100,Tb927.2.1120,Tb927.2.1180,Tb927.2.1210,Tb927.2.270,Tb927.2.280,T…	1.46989	1.5656
Tb427_000813800.1-p1-CDS1	Tb427_000813800.1	unitig_3005_Tb427v10	Tb11.v5.1020	retrotransposon hot spot (RHS) protein	RHS	hypothetical protein, conserved	29	0.0406	NA	0	1.01	17.64	194	71	61	74	11	14	11	2.06	2.19	2.09	1.25	1.8	1.57	Tb11.v5.1020,Tb927.1.240,Tb927.1.500,Tb927.10.16200,Tb927.11.18610,Tb927.11.18630	1.63691	1.5656
Tb427_000715300.1-p1-CDS1	Tb427_000715300.1	unitig_2128_Tb427v10	Tb11.v5.1020	retrotransposon hot spot (RHS) protein	RHS	Reverse transcriptase (RNA-dependent DNA polymerase)	26	-0.1188	NA	0	0.73	17.46	227	70	58	66	13	8	10	2.04	2.08	1.86	1.48	1.03	1.42	Tb11.v5.1020,Tb927.1.240,Tb927.1.500,Tb927.10.16200,Tb927.11.18610,Tb927.11.18630	1.73552	1.5656
Tb427_000294700.1-p1-CDS1	Tb427_000294700.1	Chr3_5A_Tb427v10	Tb11.v5.1020	retrotransposon hot spot (RHS) protein	RHS	Reverse transcriptase (RNA-dependent DNA polymerase)/RNase H	27	0.1479	NA	0	1.04	29	377	55	43	66	13	18	8	1.6	1.54	1.86	1.48	2.32	1.14	Tb11.v5.1020,Tb927.1.240,Tb927.1.500,Tb927.10.16200,Tb927.11.18610,Tb927.11.18630	1.79909	1.5656
Tb427_110012000.1-p1-CDS3	Tb427_110012000.1	Chr11_core_Tb427v10	Tb927.11.730	hypothetical protein	ZUnknown	hypothetical protein	23	0.0413	NA	0	0.79	1.5	24	54	31	54	16	14	6	1.57	1.11	1.52	1.82	1.8	0.85	Tb927.11.730	1.94486	1.5656
Tb427_090035000.1-p1-CDS1	Tb427_090035000.1	Chr9_core_Tb427v10	#N/A	#N/A	#N/A	#N/A	29	-0.0752	NA	0	0.88	1	11	94	59	74	11	15	7	2.73	2.12	2.09	1.25	1.93	1	#N/A	1.96347	1.5656
Tb427_000271600.1-p1-CDS2	Tb427_000271600.1	Chr1_5A_Tb427v10	Tb05.5K5.350	ESAG3 pseudogene	ESAG.pseudo	hypothetical protein, conserved	20	-0.1091	NA	0	0.53	1	9	34	40	83	9	6	7	0.99	1.44	2.34	1.02	0.77	1	Tb05.5K5.350,Tb05.5K5.420,Tb05.5K5.500,Tb08.27P2.160,Tb08.27P2.250,Tb08.27P2.330,Tb08.27P2.400,Tb08.27P2.520,Tb09.v4.0024,Tb09.v4.0027,Tb09.v4.0033,Tb09.v4.0045,Tb09.v4.0062,Tb09.v4.0083,Tb09.v4.0100,Tb09.v4.0115,Tb09.v4.0130,Tb09.v4.0132,Tb09.v4.0154,Tb09.v4.0160,Tb09.v4.0172,Tb09.v4.0181,Tb09.v4.0201,Tb09.v4.0206,Tb10.v4.0057,Tb10.v4.0066,Tb10.v4.0074,Tb10.v4.0090,Tb10.v4.0101,Tb10.v4.0137,Tb10…	2.14078	1.5656
Tb427_000645000.1-p1-CDS1	Tb427_000645000.1	unitig_1835_Tb427v10	Tb09.v4.0013	retrotransposon hot spot (RHS) protein	RHS	Retrotransposon hot spot protein	27	0.1172	NA	0	1.01	57.33	688	63	41	71	12	11	14	1.83	1.47	2	1.36	1.42	1.99	Tb09.v4.0013,Tb09.v4.0067,Tb11.0820,Tb11.1780,Tb11.v5.0214,Tb11.v5.0294,Tb11.v5.0295,Tb11.v5.0325,Tb11.v5.0326,Tb11.v5.0353,Tb11.v5.0489,Tb11.v5.0532,Tb11.v5.0533,Tb11.v5.0594,Tb11.v5.0624,Tb11.v5.0670,Tb11.v5.0693,Tb11.v5.0839,Tb927.1.120,Tb927.1.180,Tb927.1.190,Tb927.1.220,Tb927.1.70,Tb927.1.90,Tb927.10.110,Tb927.10.70,Tb927.2.100,Tb927.2.1120,Tb927.2.1180,Tb927.2.1210,Tb927.2.270,Tb927.2.280,T…	2.18587	1.5656
Tb427_110154900.1-p1-CDS1	Tb427_110154900.1	Chr11_core_Tb427v10	#N/A	#N/A	#N/A	#N/A	28	0.1038	NA	0	1.06	1	12	71	48	71	12	10	16	2.06	1.72	2	1.36	1.29	2.28	#N/A	2.28096	1.5656
Tb427_000756400.1-p1-CDS1	Tb427_000756400.1	unitig_2332_Tb427v10	Tb927.2.300	DNA-directed RNA polymerase, pseudogene	Pseudogene	RNA polymerase Rpb2, domain 4	27	-0.1742	NA	0	0.69	14.79	207	89	56	63	14	7	10	2.59	2.01	1.78	1.59	0.9	1.42	Tb927.2.300,Tb927.2.420,Tb927.2.460,Tb927.2.540,Tb927.4.230,Tb927.6.5190	2.37295	1.5656
Tb427_000662800.1-p1-CDS1	Tb427_000662800.1	unitig_1870_Tb427v10	Tb09.v4.0013	retrotransposon hot spot (RHS) protein	RHS	Retrotransposon hot spot protein	19	-0.124	NA	0	0.48	22.44	359	37	34	55	16	7	5	1.08	1.22	1.55	1.82	0.9	0.71	Tb09.v4.0013,Tb09.v4.0067,Tb11.0820,Tb11.1780,Tb11.v5.0214,Tb11.v5.0294,Tb11.v5.0295,Tb11.v5.0325,Tb11.v5.0326,Tb11.v5.0353,Tb11.v5.0489,Tb11.v5.0532,Tb11.v5.0533,Tb11.v5.0594,Tb11.v5.0624,Tb11.v5.0670,Tb11.v5.0693,Tb11.v5.0839,Tb927.1.120,Tb927.1.180,Tb927.1.190,Tb927.1.220,Tb927.1.70,Tb927.1.90,Tb927.10.110,Tb927.10.70,Tb927.2.100,Tb927.2.1120,Tb927.2.1180,Tb927.2.1210,Tb927.2.270,Tb927.2.280,T…	1.21412	1.57046
Tb427_000701000.1-p1-CDS1	Tb427_000701000.1	unitig_2015_Tb427v10	Tb10.v4.0215	hypothetical protein	ZUnknown	hypothetical protein, conserved	27	-0.1967	NA	0	0.68	7.3	73	100	55	79	10	9	8	2.91	1.97	2.23	1.14	1.16	1.14	Tb10.v4.0215,Tb927.9.15820	1.55582	1.57046
Tb427_000813000.1-p1-CDS1	Tb427_000813000.1	unitig_2977_Tb427v10	Tb927.9.14530	Protein of unknown function (DUF1181)	ZUnknown	Protein of unknown function (DUF1181)	22	-0.0879	NA	0	0.64	14.4	144	51	42	79	10	8	8	1.48	1.51	2.23	1.14	1.03	1.14	Tb927.9.14530	1.59455	1.57046
Tb427_000816100.1-p1-CDS1	Tb427_000816100.1	unitig_3019_Tb427v10	Tb09.v4.0152	hypothetical protein	ZUnknown	hypothetical protein, conserved	26	-0.0758	NA	0	0.8	14.27	157	85	47	75	11	11	9	2.47	1.69	2.12	1.25	1.42	1.28	Tb09.v4.0152,Tb927.11.17830,Tb927.9.760	1.62293	1.57046
Tb427_000277500.1-p1-CDS1	Tb427_000277500.1	Chr1_5B_Tb427v10	Tb10.v4.0215	hypothetical protein	ZUnknown	hypothetical protein, conserved	27	-0.2088	NA	0	0.65	7.07	99	76	71	63	14	6	10	2.21	2.55	1.78	1.59	0.77	1.42	Tb10.v4.0215,Tb927.9.15820	1.7137	1.57046
Tb427_000749300.1-p1-CDS2	Tb427_000749300.1	unitig_224_Tb427v10	Tb927.9.15740	hypothetical protein, conserved	ZUnknown	hypothetical protein, conserved	21	-0.1624	NA	0	0.53	1.86	26	54	39	63	14	6	7	1.57	1.4	1.78	1.59	0.77	1	Tb927.9.15740,Tb927.9.15770,Tb927.9.15800	1.82375	1.57046
Tb427_030035200.1-p1-CDS1	Tb427_030035200.1	Chr3_core_Tb427v10	Tb927.3.3420	hypothetical protein (pseudogene),hypothetical protein, point mutation	ZUnknown	hypothetical protein, conserved	23	-0.0776	NA	0	0.64	30.27	454	53	40	59	15	8	8	1.54	1.44	1.67	1.7	1.03	1.14	Tb927.3.3420	1.84398	1.57046
Tb427_000677800.1-p1-CDS4	Tb427_000677800.1	unitig_1904_Tb427v10	Tb927.2.300	DNA-directed RNA polymerase, pseudogene	Pseudogene	RNA polymerase Rpb2, domain 4/RNA polymerase Rpb2, domain 6	31	0.1936	NA	0	1.24	20	240	72	56	72	12	16	15	2.09	2.01	2.03	1.36	2.06	2.13	Tb927.2.300,Tb927.2.420,Tb927.2.460,Tb927.2.540,Tb927.4.230,Tb927.6.5190	1.87971	1.57046
Tb427_000707900.1-p1-CDS3	Tb427_000707900.1	unitig_2087_Tb427v10	Tb09.v4.0013	retrotransposon hot spot (RHS) protein	RHS	Retrotransposon hot spot protein	25	-0.0948	NA	0	0.72	27.25	327	78	41	72	12	10	8	2.27	1.47	2.03	1.36	1.29	1.14	Tb09.v4.0013,Tb09.v4.0067,Tb11.0820,Tb11.1780,Tb11.v5.0214,Tb11.v5.0294,Tb11.v5.0295,Tb11.v5.0325,Tb11.v5.0326,Tb11.v5.0353,Tb11.v5.0489,Tb11.v5.0532,Tb11.v5.0533,Tb11.v5.0594,Tb11.v5.0624,Tb11.v5.0670,Tb11.v5.0693,Tb11.v5.0839,Tb927.1.120,Tb927.1.180,Tb927.1.190,Tb927.1.220,Tb927.1.70,Tb927.1.90,Tb927.10.110,Tb927.10.70,Tb927.2.100,Tb927.2.1120,Tb927.2.1180,Tb927.2.1210,Tb927.2.270,Tb927.2.280,T…	1.97453	1.57046
Tb427_000663300.1-p1-CDS8	Tb427_000663300.1	unitig_1878_Tb427v10	Tb11.v5.1020	retrotransposon hot spot (RHS) protein	RHS	hypothetical protein, conserved	23	-0.1723	NA	0	0.57	34	408	65	44	72	12	4	10	1.89	1.58	2.03	1.36	0.52	1.42	Tb11.v5.1020,Tb927.1.240,Tb927.1.500,Tb927.10.16200,Tb927.11.18610,Tb927.11.18630	1.97453	1.57046
Tb427_000708800.1-p1-CDS1	Tb427_000708800.1	unitig_2087_Tb427v10	Tb11.v5.0349	DNA-directed RNA polymerase II subunit 2	RNA.synthesis	RNA polymerase Rpb2, domain 6	25	-0.1508	NA	0	0.68	30.33	364	62	65	72	12	8	9	1.8	2.33	2.03	1.36	1.03	1.28	Tb11.v5.0349,Tb927.1.100,Tb927.2.1110,Tb927.2.1200,Tb927.2.490	2.16027	1.57046
Tb427_000799400.1-p1-CDS2	Tb427_000799400.1	unitig_2611_Tb427v10	Tb927.9.780	hypothetical protein	ZUnknown	hypothetical protein, conserved	28	-0.3079	NA	0	0.6	4.89	44	98	88	84	9	8	7	2.85	3.16	2.37	1.02	1.03	1	Tb927.9.780	2.16027	1.57046
Tb427_000822500.1-p1-CDS1	Tb427_000822500.1	unitig_307_Tb427v10	Tb927.1.275	ESAG4 pseudogene	ESAG.pseudo	hypothetical protein, conserved	28	-0.0206	NA	0	0.92	35.5	355	78	58	80	10	11	12	2.27	2.08	2.26	1.14	1.42	1.71	Tb927.1.275,Tb927.2.1260,Tb927.4.130,Tb927.6.100	2.52105	1.57046
Tb427_000600200.1-p1-CDS1	Tb427_000600200.1	Chr9_3A_Tb427v10	Tb11.v5.1020	retrotransposon hot spot (RHS) protein	RHS	RNase H	23	-0.2119	NA	0	0.56	33.5	335	72	49	80	10	6	8	2.09	1.76	2.26	1.14	0.77	1.14	Tb11.v5.1020,Tb927.1.240,Tb927.1.500,Tb927.10.16200,Tb927.11.18610,Tb927.11.18630	2.63227	1.57046
Tb427_000707200.1-p1-CDS2	Tb427_000707200.1	unitig_2085_Tb427v10	Tb927.2.300	DNA-directed RNA polymerase, pseudogene	Pseudogene	RNA polymerase Rpb2, domain 4/RNA polymerase Rpb2, domain 6	22	-0.1829	NA	0	0.52	55.54	722	59	40	68	13	6	7	1.72	1.44	1.92	1.48	0.77	1	Tb927.2.300,Tb927.2.420,Tb927.2.460,Tb927.2.540,Tb927.4.230,Tb927.6.5190	1.5008	1.58015
Tb427_000018100.1-p1-CDS1	Tb427_000018100.1	BES2_Tb427v10	Tb11.v5.1020	retrotransposon hot spot (RHS) protein	RHS	RNase H	27	0.0107	NA	0	0.91	18.55	204	80	45	76	11	13	10	2.33	1.62	2.15	1.25	1.68	1.42	Tb11.v5.1020,Tb927.1.240,Tb927.1.500,Tb927.10.16200,Tb927.11.18610,Tb927.11.18630	1.70487	1.58015
Tb427_070075700.1-p1-CDS8	Tb427_070075700.1	Chr7_core_Tb427v10	Tb11.v5.1020	retrotransposon hot spot (RHS) protein	RHS	hypothetical protein, conserved	23	-0.1434	NA	0	0.59	11.31	147	69	38	68	13	10	5	2.01	1.36	1.92	1.48	1.29	0.71	Tb11.v5.1020,Tb927.1.240,Tb927.1.500,Tb927.10.16200,Tb927.11.18610,Tb927.11.18630	1.81147	1.58015
Tb427_090011200.1-p1-CDS2	Tb427_090011200.1	Chr9_core_Tb427v10	Tb11.v5.1020	retrotransposon hot spot (RHS) protein	RHS	Endonuclease-reverse transcriptase/Reverse transcriptase (RNA-dependent DNA polymerase)	28	0.013	NA	0	0.92	20.92	272	72	54	68	13	10	13	2.09	1.94	1.92	1.48	1.29	1.85	Tb11.v5.1020,Tb927.1.240,Tb927.1.500,Tb927.10.16200,Tb927.11.18610,Tb927.11.18630	1.83188	1.58015
Tb427_000698500.1-p1-CDS1	Tb427_000698500.1	unitig_1997_Tb427v10	Tb09.v4.0152	hypothetical protein	ZUnknown	hypothetical protein, conserved	24	0.01	NA	0	0.79	16.92	220	59	38	68	13	11	9	1.72	1.36	1.92	1.48	1.42	1.28	Tb09.v4.0152,Tb927.11.17830,Tb927.9.760	1.85599	1.58015
Tb427_000347600.1-p1-CDS4	Tb427_000347600.1	Chr4_5B_Tb427v10	Tb05.5K5.180	GRESAG 4 receptor-type adenylate cyclase	GRESAG	Adenylate and Guanylate cyclase catalytic domain containing protein	23	-0.0493	NA	0	0.67	16.38	262	55	37	56	16	11	6	1.6	1.33	1.58	1.82	1.42	0.85	Tb05.5K5.180,Tb05.5K5.190,Tb09.v4.0009,Tb11.v5.0209,Tb11.v5.0217,Tb11.v5.0281,Tb11.v5.0379,Tb11.v5.0380,Tb11.v5.0424,Tb11.v5.0425,Tb11.v5.0429,Tb11.v5.0431,Tb11.v5.0456,Tb11.v5.0470,Tb11.v5.0484,Tb11.v5.0546,Tb11.v5.0576,Tb11.v5.0654,Tb11.v5.0784,Tb11.v5.0821,Tb11.v5.0830,Tb11.v5.0864,Tb11.v5.0865,Tb11.v5.1015,Tb11.v5.1016,Tb927.10.13040,Tb927.10.16000,Tb927.10.16190,Tb927.10.2430,Tb927.11.13740,…	1.97453	1.58015
Tb427_000834100.1-p1-CDS4	Tb427_000834100.1	unitig_407_Tb427v10	Tb05.5K5.180	GRESAG 4 receptor-type adenylate cyclase	GRESAG	Adenylate and Guanylate cyclase catalytic domain containing protein	29	0.0367	NA	0	0.97	23.25	372	69	59	56	16	8	16	2.01	2.12	1.58	1.82	1.03	2.28	Tb05.5K5.180,Tb05.5K5.190,Tb09.v4.0009,Tb11.v5.0209,Tb11.v5.0217,Tb11.v5.0281,Tb11.v5.0379,Tb11.v5.0380,Tb11.v5.0424,Tb11.v5.0425,Tb11.v5.0429,Tb11.v5.0431,Tb11.v5.0456,Tb11.v5.0470,Tb11.v5.0484,Tb11.v5.0546,Tb11.v5.0576,Tb11.v5.0654,Tb11.v5.0784,Tb11.v5.0821,Tb11.v5.0830,Tb11.v5.0864,Tb11.v5.0865,Tb11.v5.1015,Tb11.v5.1016,Tb927.10.13040,Tb927.10.16000,Tb927.10.16190,Tb927.10.2430,Tb927.11.13740,…	2.19849	1.58015
Tb427_000747800.1-p1-CDS14	Tb427_000747800.1	unitig_2246_Tb427v10	Tb927.2.300	DNA-directed RNA polymerase, pseudogene	Pseudogene	RNA polymerase Rpb2, domain 6	26	-0.0083	NA	0	0.84	4	56	55	58	64	14	11	10	1.6	2.08	1.81	1.59	1.42	1.42	Tb927.2.300,Tb927.2.420,Tb927.2.460,Tb927.2.540,Tb927.4.230,Tb927.6.5190	1.10434	1.58496
Tb427_000626800.1-p1-CDS3	Tb427_000626800.1	Chr9_5A_Tb427v10	Tb11.v5.1020	retrotransposon hot spot (RHS) protein	RHS	Reverse transcriptase (RNA-dependent DNA polymerase)	32	0.1895	NA	0	1.26	17.21	241	76	62	64	14	19	13	2.21	2.23	1.81	1.59	2.45	1.85	Tb11.v5.1020,Tb927.1.240,Tb927.1.500,Tb927.10.16200,Tb927.11.18610,Tb927.11.18630	1.1177	1.58496
Tb427_000715200.1-p1-CDS1	Tb427_000715200.1	unitig_2128_Tb427v10	Tb11.v5.1020	retrotransposon hot spot (RHS) protein	RHS	Endonuclease-reverse transcriptase	31	-0.0225	NA	0	0.97	10.5	168	94	62	56	16	9	15	2.73	2.23	1.58	1.82	1.16	2.13	Tb11.v5.1020,Tb927.1.240,Tb927.1.500,Tb927.10.16200,Tb927.11.18610,Tb927.11.18630	1.28096	1.58496
Tb427_000374800.1-p1-CDS3	Tb427_000374800.1	Chr5_3B_Tb427v10	Tb05.5K5.350	ESAG3 pseudogene	ESAG.pseudo	hypothetical protein	29	0.0382	NA	0	1	108.91	1198	75	57	77	11	11	14	2.18	2.05	2.17	1.25	1.42	1.99	Tb05.5K5.350,Tb05.5K5.420,Tb05.5K5.500,Tb08.27P2.160,Tb08.27P2.250,Tb08.27P2.330,Tb08.27P2.400,Tb08.27P2.520,Tb09.v4.0024,Tb09.v4.0027,Tb09.v4.0033,Tb09.v4.0045,Tb09.v4.0062,Tb09.v4.0083,Tb09.v4.0100,Tb09.v4.0115,Tb09.v4.0130,Tb09.v4.0132,Tb09.v4.0154,Tb09.v4.0160,Tb09.v4.0172,Tb09.v4.0181,Tb09.v4.0201,Tb09.v4.0206,Tb10.v4.0057,Tb10.v4.0066,Tb10.v4.0074,Tb10.v4.0090,Tb10.v4.0101,Tb10.v4.0137,Tb10…	1.52607	1.58496
Tb427_000780200.1-p1-CDS8	Tb427_000780200.1	unitig_2489_Tb427v10	Tb05.5K5.180	GRESAG 4 receptor-type adenylate cyclase	GRESAG	Adenylate and Guanylate cyclase catalytic domain containing protein	27	-0.076	NA	0	0.81	30.29	212	74	67	93	7	16	5	2.15	2.41	2.63	0.79	2.06	0.71	Tb05.5K5.180,Tb05.5K5.190,Tb09.v4.0009,Tb11.v5.0209,Tb11.v5.0217,Tb11.v5.0281,Tb11.v5.0379,Tb11.v5.0380,Tb11.v5.0424,Tb11.v5.0425,Tb11.v5.0429,Tb11.v5.0431,Tb11.v5.0456,Tb11.v5.0470,Tb11.v5.0484,Tb11.v5.0546,Tb11.v5.0576,Tb11.v5.0654,Tb11.v5.0784,Tb11.v5.0821,Tb11.v5.0830,Tb11.v5.0864,Tb11.v5.0865,Tb11.v5.1015,Tb11.v5.1016,Tb927.10.13040,Tb927.10.16000,Tb927.10.16190,Tb927.10.2430,Tb927.11.13740,…	1.53107	1.58496
Tb427_000699800.1-p1-CDS1	Tb427_000699800.1	unitig_2014_Tb427v10	Tb05.5K5.180	GRESAG 4 receptor-type adenylate cyclase	GRESAG	Adenylate and Guanylate cyclase catalytic domain containing protein	29	0.2042	NA	0	1.14	20.27	304	58	47	61	15	18	11	1.69	1.69	1.72	1.7	2.32	1.57	Tb05.5K5.180,Tb05.5K5.190,Tb09.v4.0009,Tb11.v5.0209,Tb11.v5.0217,Tb11.v5.0281,Tb11.v5.0379,Tb11.v5.0380,Tb11.v5.0424,Tb11.v5.0425,Tb11.v5.0429,Tb11.v5.0431,Tb11.v5.0456,Tb11.v5.0470,Tb11.v5.0484,Tb11.v5.0546,Tb11.v5.0576,Tb11.v5.0654,Tb11.v5.0784,Tb11.v5.0821,Tb11.v5.0830,Tb11.v5.0864,Tb11.v5.0865,Tb11.v5.1015,Tb11.v5.1016,Tb927.10.13040,Tb927.10.16000,Tb927.10.16190,Tb927.10.2430,Tb927.11.13740,…	1.69153	1.58496
Tb427_000809400.1-p1-CDS4	Tb427_000809400.1	unitig_284_Tb427v10	Tb927.2.300	DNA-directed RNA polymerase, pseudogene	Pseudogene	RNA polymerase Rpb2, domain 4/RNA polymerase Rpb2, domain 6	25	0.0096	NA	0	0.82	2.09	23	61	42	77	11	13	8	1.77	1.51	2.17	1.25	1.68	1.14	Tb927.2.300,Tb927.2.420,Tb927.2.460,Tb927.2.540,Tb927.4.230,Tb927.6.5190	1.7137	1.58496
Tb427_100027800.1-p1-CDS4	Tb427_100027800.1	Chr10_core_Tb427v10	Tb927.10.2360	hypothetical protein, tryp specific	ZUnknown	hypothetical protein, conserved	25	-0.3402	NA	0	0.47	1	11	83	65	77	11	6	6	2.41	2.33	2.17	1.25	0.77	0.85	Tb927.10.2360	1.89918	1.58496
Tb427_000775300.1-p1-CDS5	Tb427_000775300.1	unitig_2467_Tb427v10	Tb05.5K5.180	GRESAG 4 receptor-type adenylate cyclase	GRESAG	Adenylate and Guanylate cyclase catalytic domain containing protein	26	-0.0992	NA	0	0.75	16.5	231	78	52	65	14	10	9	2.27	1.87	1.84	1.59	1.29	1.28	Tb05.5K5.180,Tb05.5K5.190,Tb09.v4.0009,Tb11.v5.0209,Tb11.v5.0217,Tb11.v5.0281,Tb11.v5.0379,Tb11.v5.0380,Tb11.v5.0424,Tb11.v5.0425,Tb11.v5.0429,Tb11.v5.0431,Tb11.v5.0456,Tb11.v5.0470,Tb11.v5.0484,Tb11.v5.0546,Tb11.v5.0576,Tb11.v5.0654,Tb11.v5.0784,Tb11.v5.0821,Tb11.v5.0830,Tb11.v5.0864,Tb11.v5.0865,Tb11.v5.1015,Tb11.v5.1016,Tb927.10.13040,Tb927.10.16000,Tb927.10.16190,Tb927.10.2430,Tb927.11.13740,…	2.16027	1.58496
Tb427_000286000.1-p1-CDS1	Tb427_000286000.1	Chr3_3A_Tb427v10	Tb927.2.300	DNA-directed RNA polymerase, pseudogene	Pseudogene	RNA polymerase Rpb2, domain 4	38	0.0807	NA	0	1.39	33.6	336	117	89	81	10	16	19	3.4	3.2	2.29	1.14	2.06	2.7	Tb927.2.300,Tb927.2.420,Tb927.2.460,Tb927.2.540,Tb927.4.230,Tb927.6.5190	1.12433	1.58976
Tb427_000150600.1-p1-CDS1	Tb427_000150600.1	Chr11_3B_Tb427v10	Tb11.v5.1020	retrotransposon hot spot (RHS) protein	RHS	RNase H	22	-0.0963	NA	0	0.59	25.77	335	41	45	69	13	7	8	1.19	1.62	1.95	1.48	0.9	1.14	Tb11.v5.1020,Tb927.1.240,Tb927.1.500,Tb927.10.16200,Tb927.11.18610,Tb927.11.18630	1.39506	1.58976
Tb427_000348200.1-p1-CDS1	Tb427_000348200.1	Chr4_5B_Tb427v10	Tb09.v4.0152	hypothetical protein	ZUnknown	hypothetical protein, conserved	26	0.1014	NA	0	0.94	16.38	213	54	44	69	13	14	10	1.57	1.58	1.95	1.48	1.8	1.42	Tb09.v4.0152,Tb927.11.17830,Tb927.9.760	1.69153	1.58976
Tb427_000683300.1-p1-CDS2	Tb427_000683300.1	unitig_1914_Tb427v10	Tb927.6.240	hypothetical protein, conserved	ZUnknown	hypothetical protein, conserved	28	-0.1518	NA	0	0.75	4	56	81	70	65	14	11	8	2.36	2.51	1.84	1.59	1.42	1.14	Tb927.6.240	1.70044	1.58976
Tb427_000285600.1-p1-CDS5	Tb427_000285600.1	Chr3_3A_Tb427v10	Tb927.2.300	DNA-directed RNA polymerase, pseudogene	Pseudogene	RNA polymerase Rpb2, domain 4/RNA polymerase Rpb2, domain 6	27	-0.1161	NA	0	0.78	11.86	83	87	61	94	7	12	8	2.53	2.19	2.65	0.79	1.55	1.14	Tb927.2.300,Tb927.2.420,Tb927.2.460,Tb927.2.540,Tb927.4.230,Tb927.6.5190	2.16027	1.58976
Tb427_000834800.1-p1-CDS2	Tb427_000834800.1	unitig_427_Tb427v10	Tb05.5K5.350	ESAG3 pseudogene	ESAG.pseudo	hypothetical protein, conserved	29	-0.274	NA	0	0.63	9	90	93	87	82	10	6	10	2.7	3.12	2.31	1.14	0.77	1.42	Tb05.5K5.350,Tb05.5K5.420,Tb05.5K5.500,Tb08.27P2.160,Tb08.27P2.250,Tb08.27P2.330,Tb08.27P2.400,Tb08.27P2.520,Tb09.v4.0024,Tb09.v4.0027,Tb09.v4.0033,Tb09.v4.0045,Tb09.v4.0062,Tb09.v4.0083,Tb09.v4.0100,Tb09.v4.0115,Tb09.v4.0130,Tb09.v4.0132,Tb09.v4.0154,Tb09.v4.0160,Tb09.v4.0172,Tb09.v4.0181,Tb09.v4.0201,Tb09.v4.0206,Tb10.v4.0057,Tb10.v4.0066,Tb10.v4.0074,Tb10.v4.0090,Tb10.v4.0101,Tb10.v4.0137,Tb10…	2.21412	1.58976
Tb427_000271600.1-p1-CDS7	Tb427_000271600.1	Chr1_5A_Tb427v10	Tb05.5K5.350	ESAG3 pseudogene	ESAG.pseudo	hypothetical protein, conserved	24	0.0861	NA	0	0.85	1	12	40	36	74	12	15	7	1.16	1.29	2.09	1.36	1.93	1	Tb05.5K5.350,Tb05.5K5.420,Tb05.5K5.500,Tb08.27P2.160,Tb08.27P2.250,Tb08.27P2.330,Tb08.27P2.400,Tb08.27P2.520,Tb09.v4.0024,Tb09.v4.0027,Tb09.v4.0033,Tb09.v4.0045,Tb09.v4.0062,Tb09.v4.0083,Tb09.v4.0100,Tb09.v4.0115,Tb09.v4.0130,Tb09.v4.0132,Tb09.v4.0154,Tb09.v4.0160,Tb09.v4.0172,Tb09.v4.0181,Tb09.v4.0201,Tb09.v4.0206,Tb10.v4.0057,Tb10.v4.0066,Tb10.v4.0074,Tb10.v4.0090,Tb10.v4.0101,Tb10.v4.0137,Tb10…	2.22342	1.58976
Tb427_000644600.1-p1-CDS3	Tb427_000644600.1	unitig_1835_Tb427v10	Tb05.5K5.180	GRESAG 4 receptor-type adenylate cyclase	GRESAG	Adenylate and Guanylate cyclase catalytic domain containing protein	30	0.0886	NA	0	1.08	15.18	167	70	59	78	11	10	17	2.04	2.12	2.2	1.25	1.29	2.42	Tb05.5K5.180,Tb05.5K5.190,Tb09.v4.0009,Tb11.v5.0209,Tb11.v5.0217,Tb11.v5.0281,Tb11.v5.0379,Tb11.v5.0380,Tb11.v5.0424,Tb11.v5.0425,Tb11.v5.0429,Tb11.v5.0431,Tb11.v5.0456,Tb11.v5.0470,Tb11.v5.0484,Tb11.v5.0546,Tb11.v5.0576,Tb11.v5.0654,Tb11.v5.0784,Tb11.v5.0821,Tb11.v5.0830,Tb11.v5.0864,Tb11.v5.0865,Tb11.v5.1015,Tb11.v5.1016,Tb927.10.13040,Tb927.10.16000,Tb927.10.16190,Tb927.10.2430,Tb927.11.13740,…	1.46989	1.59455
Tb427_000270700.1-p1-CDS1	Tb427_000270700.1	Chr1_5A_Tb427v10	Tb927.2.300	DNA-directed RNA polymerase, pseudogene	Pseudogene	RNA polymerase Rpb2, domain 4	27	0.0616	NA	0	0.9	24.87	373	66	41	62	15	12	11	1.92	1.47	1.75	1.7	1.55	1.57	Tb927.2.300,Tb927.2.420,Tb927.2.460,Tb927.2.540,Tb927.4.230,Tb927.6.5190	2.04614	1.59932
Tb427_000638500.1-p1-CDS2	Tb427_000638500.1	unitig_166_Tb427v10	Tb927.2.1060	retrotransposon hot spot protein (RHS1, pseudogene)	RHS	Retrotransposon hot spot protein	30	-0.1788	NA	0	0.79	19.8	198	115	67	82	10	10	10	3.34	2.41	2.31	1.14	1.29	1.42	Tb927.2.1060,Tb927.2.1160,Tb927.2.220	2.86987	1.59932
Tb427_000712500.1-p1-CDS2	Tb427_000712500.1	unitig_2120_Tb427v10	Tb10.v4.0215	hypothetical protein	ZUnknown	hypothetical protein, conserved	30	-0.0458	NA	0	0.94	25.64	282	110	52	78	11	13	11	3.2	1.87	2.2	1.25	1.68	1.57	Tb10.v4.0215,Tb927.9.15820	2.06695	1.60407
Tb427_000645500.1-p1-CDS2	Tb427_000645500.1	unitig_1837_Tb427v10	Tb927.2.1130	retrotransposon hot spot protein (RHS3, pseudogene)	RHS	Retrotransposon hot spot protein	31	-0.0249	NA	0	0.98	16.31	212	85	73	70	13	13	12	2.47	2.62	1.98	1.48	1.68	1.71	Tb927.2.1130	1.65076	1.61824
Tb427_000436700.1-p1-CDS1	Tb427_000436700.1	Chr6_3B_Tb427v10	Tb11.v5.1020	retrotransposon hot spot (RHS) protein	RHS	hypothetical protein, conserved	24	-0.1392	NA	0	0.62	17.94	287	58	56	58	16	10	6	1.69	2.01	1.64	1.82	1.29	0.85	Tb11.v5.1020,Tb927.1.240,Tb927.1.500,Tb927.10.16200,Tb927.11.18610,Tb927.11.18630	1.8679	1.61824
Tb427_000790900.1-p1-CDS1	Tb427_000790900.1	unitig_2565_Tb427v10	Tb927.1.275	ESAG4 pseudogene	ESAG.pseudo	hypothetical protein, conserved	30	0.1449	NA	0	1.16	29.3	293	70	58	83	10	19	11	2.04	2.08	2.34	1.14	2.45	1.57	Tb927.1.275,Tb927.2.1260,Tb927.4.130,Tb927.6.100	2.16993	1.61824
Tb427_000844400.1-p1-CDS4	Tb427_000844400.1	unitig_835_Tb427v10	Tb05.5K5.350	ESAG3 pseudogene	ESAG.pseudo	hypothetical protein	38	0.5815	NA	0	2.03	58.93	825	36	57	67	14	24	28	1.05	2.05	1.89	1.59	3.09	3.98	Tb05.5K5.350,Tb05.5K5.420,Tb05.5K5.500,Tb08.27P2.160,Tb08.27P2.250,Tb08.27P2.330,Tb08.27P2.400,Tb08.27P2.520,Tb09.v4.0024,Tb09.v4.0027,Tb09.v4.0033,Tb09.v4.0045,Tb09.v4.0062,Tb09.v4.0083,Tb09.v4.0100,Tb09.v4.0115,Tb09.v4.0130,Tb09.v4.0132,Tb09.v4.0154,Tb09.v4.0160,Tb09.v4.0172,Tb09.v4.0181,Tb09.v4.0201,Tb09.v4.0206,Tb10.v4.0057,Tb10.v4.0066,Tb10.v4.0074,Tb10.v4.0090,Tb10.v4.0101,Tb10.v4.0137,Tb10…	2.19535	1.61824
Tb427_000747800.1-p1-CDS21	Tb427_000747800.1	unitig_2246_Tb427v10	Tb927.2.300	DNA-directed RNA polymerase, pseudogene	Pseudogene	RNA polymerase Rpb2, domain 6	28	-0.1497	NA	0	0.75	2	20	85	63	83	10	8	11	2.47	2.26	2.34	1.14	1.03	1.57	Tb927.2.300,Tb927.2.420,Tb927.2.460,Tb927.2.540,Tb927.4.230,Tb927.6.5190	2.38681	1.61824
Tb427_000164100.1-p1-CDS1	Tb427_000164100.1	Chr11_3B_Tb427v10	Tb11.v5.1020	retrotransposon hot spot (RHS) protein	RHS	Reverse transcriptase (RNA-dependent DNA polymerase)/RNase H	37	0.0852	NA	0	1.34	64.11	577	107	88	87	9	24	11	3.11	3.16	2.46	1.02	3.09	1.57	Tb11.v5.1020,Tb927.1.240,Tb927.1.500,Tb927.10.16200,Tb927.11.18610,Tb927.11.18630	3.41143	1.61824
Tb427_000688600.1-p1-CDS4	Tb427_000688600.1	unitig_1928_Tb427v10	Tb09.v4.0013	retrotransposon hot spot (RHS) protein	RHS	Retrotransposon hot spot protein	33	0.1797	NA	0	1.32	35.93	503	82	60	67	14	9	24	2.38	2.15	1.89	1.59	1.16	3.42	Tb09.v4.0013,Tb09.v4.0067,Tb11.0820,Tb11.1780,Tb11.v5.0214,Tb11.v5.0294,Tb11.v5.0295,Tb11.v5.0325,Tb11.v5.0326,Tb11.v5.0353,Tb11.v5.0489,Tb11.v5.0532,Tb11.v5.0533,Tb11.v5.0594,Tb11.v5.0624,Tb11.v5.0670,Tb11.v5.0693,Tb11.v5.0839,Tb927.1.120,Tb927.1.180,Tb927.1.190,Tb927.1.220,Tb927.1.70,Tb927.1.90,Tb927.10.110,Tb927.10.70,Tb927.2.100,Tb927.2.1120,Tb927.2.1180,Tb927.2.1210,Tb927.2.270,Tb927.2.280,T…	1.47508	1.62293
Tb427_000682600.1-p1-CDS1	Tb427_000682600.1	unitig_1912_Tb427v10	Tb09.v4.0013	retrotransposon hot spot (RHS) protein	RHS	Retrotransposon hot spot protein	35	-0.1883	NA	0	0.84	21.07	316	123	101	63	15	16	6	3.58	3.63	1.78	1.7	2.06	0.85	Tb09.v4.0013,Tb09.v4.0067,Tb11.0820,Tb11.1780,Tb11.v5.0214,Tb11.v5.0294,Tb11.v5.0295,Tb11.v5.0325,Tb11.v5.0326,Tb11.v5.0353,Tb11.v5.0489,Tb11.v5.0532,Tb11.v5.0533,Tb11.v5.0594,Tb11.v5.0624,Tb11.v5.0670,Tb11.v5.0693,Tb11.v5.0839,Tb927.1.120,Tb927.1.180,Tb927.1.190,Tb927.1.220,Tb927.1.70,Tb927.1.90,Tb927.10.110,Tb927.10.70,Tb927.2.100,Tb927.2.1120,Tb927.2.1180,Tb927.2.1210,Tb927.2.270,Tb927.2.280,T…	1.58496	1.62293
Tb427_000838700.1-p1-CDS2	Tb427_000838700.1	unitig_520_Tb427v10	Tb10.v4.0215	hypothetical protein	ZUnknown	hypothetical protein, conserved	31	-0.1999	NA	0	0.78	12.25	98	109	86	91	8	9	11	3.17	3.09	2.57	0.91	1.16	1.57	Tb10.v4.0215,Tb927.9.15820	1.66448	1.62293
Tb427_000222300.1-p1-CDS2	Tb427_000222300.1	Chr1_3A_Tb427v10	Tb10.v4.0215	hypothetical protein	ZUnknown	hypothetical protein, conserved	35	-0.1229	NA	0	0.99	8.5	85	143	83	83	10	9	16	4.16	2.98	2.34	1.14	1.16	2.28	Tb10.v4.0215,Tb927.9.15820	1.95606	1.62293
Tb427_030025900.1-p1-CDS1	Tb427_030025900.1	Chr3_core_Tb427v10	Tb927.3.2550	hypothetical protein, conserved	ZUnknown	hypothetical protein, conserved	21	0.0137	NA	0	0.7	11.1	111	39	30	83	10	8	10	1.13	1.08	2.34	1.14	1.03	1.42	Tb927.3.2550,Tb927.3.2560,Tb927.3.2570	2.12433	1.62293
Tb427_000501100.1-p1-CDS3	Tb427_000501100.1	Chr8_5A_Tb427v10	Tb10.v4.0215	hypothetical protein	ZUnknown	hypothetical protein, conserved	31	-0.1398	NA	0	0.85	26.09	287	106	73	79	11	13	9	3.08	2.62	2.23	1.25	1.68	1.28	Tb10.v4.0215,Tb927.9.15820	2.17951	1.62293
Tb427_110126100.1-p1-CDS1	Tb427_110126100.1	Chr11_core_Tb427v10	#N/A	#N/A	#N/A	#N/A	23	-0.0862	NA	0	0.62	1	14	47	44	67	14	8	8	1.37	1.58	1.89	1.59	1.03	1.14	#N/A	2.31615	1.62293
Tb427_000646000.1-p1-CDS1	Tb427_000646000.1	unitig_1837_Tb427v10	Tb927.1.490	hypothetical protein	ZUnknown	hypothetical protein, conserved	22	-0.3005	NA	0	0.42	21	252	59	58	75	12	7	4	1.72	2.08	2.12	1.36	0.9	0.57	Tb927.1.490,Tb927.4.180,Tb927.9.740	2.33914	1.62293
Tb427_100053700.1-p1-CDS1	Tb427_100053700.1	Chr10_core_Tb427v10	#N/A	#N/A	#N/A	#N/A	21	-0.1399	NA	0	0.53	1	12	56	36	75	12	10	4	1.63	1.29	2.12	1.36	1.29	0.57	#N/A	2.66903	1.62293
Tb427_100039100.1-p1-CDS4	Tb427_100039100.1	Chr10_core_Tb427v10	Tb927.10.3420	Not an ORF	3_UTR	hypothetical protein, conserved	25	-0.3592	NA	0	0.42	1	7	104	65	96	7	6	5	3.02	2.33	2.71	0.79	0.77	0.71	Tb927.10.3420	3.28096	1.62293
Tb427_000668700.1-p1-CDS1	Tb427_000668700.1	unitig_1884_Tb427v10	Tb11.v5.1020	retrotransposon hot spot (RHS) protein	RHS	hypothetical protein, conserved	28	0.141	NA	0	1.09	4.11	37	62	48	88	9	12	16	1.8	1.72	2.48	1.02	1.55	2.28	Tb11.v5.1020,Tb927.1.240,Tb927.1.500,Tb927.10.16200,Tb927.11.18610,Tb927.11.18630	1.12433	1.63227
Tb427_000010500.1-p1-CDS4	Tb427_000010500.1	BES14_Tb427v10	Tb927.3.560	ESAG11	ESAG	hypothetical protein, conserved	24	0.0571	NA	0	0.81	50.27	553	47	33	80	11	11	10	1.37	1.18	2.26	1.25	1.42	1.42	Tb927.3.560	1.41143	1.63227
Tb427_000316500.1-p1-CDS1	Tb427_000316500.1	Chr4_3A_Tb427v10	Tb05.5K5.350	ESAG3 pseudogene	ESAG.pseudo	hypothetical protein, conserved	31	0.1545	NA	0	1.15	47.23	614	78	54	72	13	16	14	2.27	1.94	2.03	1.48	2.06	1.99	Tb05.5K5.350,Tb05.5K5.420,Tb05.5K5.500,Tb08.27P2.160,Tb08.27P2.250,Tb08.27P2.330,Tb08.27P2.400,Tb08.27P2.520,Tb09.v4.0024,Tb09.v4.0027,Tb09.v4.0033,Tb09.v4.0045,Tb09.v4.0062,Tb09.v4.0083,Tb09.v4.0100,Tb09.v4.0115,Tb09.v4.0130,Tb09.v4.0132,Tb09.v4.0154,Tb09.v4.0160,Tb09.v4.0172,Tb09.v4.0181,Tb09.v4.0201,Tb09.v4.0206,Tb10.v4.0057,Tb10.v4.0066,Tb10.v4.0074,Tb10.v4.0090,Tb10.v4.0101,Tb10.v4.0137,Tb10…	1.46989	1.63227
Tb427_000692600.1-p1-CDS4	Tb427_000692600.1	unitig_1967_Tb427v10	Tb05.5K5.180	GRESAG 4 receptor-type adenylate cyclase	GRESAG	Adenylate and Guanylate cyclase catalytic domain containing protein	27	0.025	NA	0	0.89	23.77	309	62	54	72	13	12	11	1.8	1.94	2.03	1.48	1.55	1.57	Tb05.5K5.180,Tb05.5K5.190,Tb09.v4.0009,Tb11.v5.0209,Tb11.v5.0217,Tb11.v5.0281,Tb11.v5.0379,Tb11.v5.0380,Tb11.v5.0424,Tb11.v5.0425,Tb11.v5.0429,Tb11.v5.0431,Tb11.v5.0456,Tb11.v5.0470,Tb11.v5.0484,Tb11.v5.0546,Tb11.v5.0576,Tb11.v5.0654,Tb11.v5.0784,Tb11.v5.0821,Tb11.v5.0830,Tb11.v5.0864,Tb11.v5.0865,Tb11.v5.1015,Tb11.v5.1016,Tb927.10.13040,Tb927.10.16000,Tb927.10.16190,Tb927.10.2430,Tb927.11.13740,…	1.62761	1.63227
Tb427_000828400.1-p1-CDS9	Tb427_000828400.1	unitig_3147_Tb427v10	Tb927.2.300	DNA-directed RNA polymerase, pseudogene	Pseudogene	RNA polymerase Rpb2, domain 4	22	-0.2058	NA	0	0.46	27.86	390	75	30	68	14	6	6	2.18	1.08	1.92	1.59	0.77	0.85	Tb927.2.300,Tb927.2.420,Tb927.2.460,Tb927.2.540,Tb927.4.230,Tb927.6.5190	1.67356	1.63227
Tb427_000815400.1-p1-CDS1	Tb427_000815400.1	unitig_3019_Tb427v10	Tb927.2.300	DNA-directed RNA polymerase, pseudogene	Pseudogene	RNA polymerase Rpb2, domain 4	27	-0.1903	NA	0	0.64	14.43	202	86	60	68	14	13	4	2.5	2.15	1.92	1.59	1.68	0.57	Tb927.2.300,Tb927.2.420,Tb927.2.460,Tb927.2.540,Tb927.4.230,Tb927.6.5190	1.76553	1.63227
Tb427_020007200.1-p1-CDS1	Tb427_020007200.1	Chr2_core_Tb427v10	Tb11.v5.1020	retrotransposon hot spot (RHS) protein	RHS	Reverse transcriptase (RNA-dependent DNA polymerase)	27	-0.0141	NA	0	0.84	3.09	34	67	52	80	11	14	8	1.95	1.87	2.26	1.25	1.8	1.14	Tb11.v5.1020,Tb927.1.240,Tb927.1.500,Tb927.10.16200,Tb927.11.18610,Tb927.11.18630	1.8679	1.63227
Tb427_000790200.1-p1-CDS1	Tb427_000790200.1	unitig_2534_Tb427v10	Tb09.v4.0013	retrotransposon hot spot (RHS) protein	RHS	Retrotransposon hot spot protein	26	-0.182	NA	0	0.66	11.31	147	93	50	72	13	9	8	2.7	1.8	2.03	1.48	1.16	1.14	Tb09.v4.0013,Tb09.v4.0067,Tb11.0820,Tb11.1780,Tb11.v5.0214,Tb11.v5.0294,Tb11.v5.0295,Tb11.v5.0325,Tb11.v5.0326,Tb11.v5.0353,Tb11.v5.0489,Tb11.v5.0532,Tb11.v5.0533,Tb11.v5.0594,Tb11.v5.0624,Tb11.v5.0670,Tb11.v5.0693,Tb11.v5.0839,Tb927.1.120,Tb927.1.180,Tb927.1.190,Tb927.1.220,Tb927.1.70,Tb927.1.90,Tb927.10.110,Tb927.10.70,Tb927.2.100,Tb927.2.1120,Tb927.2.1180,Tb927.2.1210,Tb927.2.270,Tb927.2.280,T…	1.92979	1.63227
Tb427_000757300.1-p1-CDS1	Tb427_000757300.1	unitig_2332_Tb427v10	Tb09.v4.0013	retrotransposon hot spot (RHS) protein	RHS	Retrotransposon hot spot protein	28	0.1891	NA	0	1.1	22.64	317	45	53	68	14	19	10	1.31	1.9	1.92	1.59	2.45	1.42	Tb09.v4.0013,Tb09.v4.0067,Tb11.0820,Tb11.1780,Tb11.v5.0214,Tb11.v5.0294,Tb11.v5.0295,Tb11.v5.0325,Tb11.v5.0326,Tb11.v5.0353,Tb11.v5.0489,Tb11.v5.0532,Tb11.v5.0533,Tb11.v5.0594,Tb11.v5.0624,Tb11.v5.0670,Tb11.v5.0693,Tb11.v5.0839,Tb927.1.120,Tb927.1.180,Tb927.1.190,Tb927.1.220,Tb927.1.70,Tb927.1.90,Tb927.10.110,Tb927.10.70,Tb927.2.100,Tb927.2.1120,Tb927.2.1180,Tb927.2.1210,Tb927.2.270,Tb927.2.280,T…	2.10434	1.63227
Tb427_000565900.1-p1-CDS5	Tb427_000565900.1	Chr9_3A_Tb427v10	Tb10.v4.0128	hypothetical protein	ZUnknown	hypothetical protein	19	0.0038	NA	0	0.61	408.09	4489	19	29	80	11	10	6	0.55	1.04	2.26	1.25	1.29	0.85	Tb10.v4.0128,Tb11.v5.0381,Tb927.11.19800	2.11103	1.63227
Tb427_000802200.1-p1-CDS1	Tb427_000802200.1	unitig_2671_Tb427v10	Tb927.1.490	hypothetical protein	ZUnknown	hypothetical protein, conserved	28	-0.0124	NA	0	0.9	23.25	279	83	51	76	12	8	15	2.41	1.83	2.15	1.36	1.03	2.13	Tb927.1.490,Tb927.4.180,Tb927.9.740	2.20477	1.63227
Tb427_100055700.1-p1-CDS3	Tb427_100055700.1	Chr10_core_Tb427v10	Tb927.10.5160	hypothetical protein	ZUnknown	hypothetical protein, conserved	33	-0.0038	NA	0	1.07	1	12	109	69	76	12	17	11	3.17	2.48	2.15	1.36	2.19	1.57	Tb927.10.5160	2.54597	1.63227
Tb427_000742100.1-p1-CDS1	Tb427_000742100.1	unitig_2222_Tb427v10	Tb927.2.300	DNA-directed RNA polymerase, pseudogene	Pseudogene	RNA polymerase Rpb2, domain 4/RNA polymerase Rpb2, domain 6	30	-0.1117	NA	0	0.85	101.25	810	101	66	92	8	11	11	2.94	2.37	2.6	0.91	1.42	1.57	Tb927.2.300,Tb927.2.420,Tb927.2.460,Tb927.2.540,Tb927.4.230,Tb927.6.5190	1.42761	1.64155
Tb427_000180000.1-p1-CDS4	Tb427_000180000.1	Chr1_3A_Tb427v10	Tb05.5K5.350	ESAG3 pseudogene	ESAG.pseudo	hypothetical protein	28	0.2328	NA	0	1.2	55	660	33	51	77	12	13	18	0.96	1.83	2.17	1.36	1.68	2.56	Tb05.5K5.350,Tb05.5K5.420,Tb05.5K5.500,Tb08.27P2.160,Tb08.27P2.250,Tb08.27P2.330,Tb08.27P2.400,Tb08.27P2.520,Tb09.v4.0024,Tb09.v4.0027,Tb09.v4.0033,Tb09.v4.0045,Tb09.v4.0062,Tb09.v4.0083,Tb09.v4.0100,Tb09.v4.0115,Tb09.v4.0130,Tb09.v4.0132,Tb09.v4.0154,Tb09.v4.0160,Tb09.v4.0172,Tb09.v4.0181,Tb09.v4.0201,Tb09.v4.0206,Tb10.v4.0057,Tb10.v4.0066,Tb10.v4.0074,Tb10.v4.0090,Tb10.v4.0101,Tb10.v4.0137,Tb10…	1.63691	1.64155
Tb427_000740400.1-p1-CDS4	Tb427_000740400.1	unitig_2219_Tb427v10	Tb09.v4.0041	leucine-rich repeat protein LRRP, pseudogene	LRRP	Leucine Rich repeat	29	-0.0314	NA	0	0.91	10.89	98	87	59	89	9	14	10	2.53	2.12	2.51	1.02	1.8	1.42	Tb09.v4.0041,Tb11.v5.0448,Tb11.v5.0551,Tb11.v5.0560,Tb11.v5.0602,Tb11.v5.0703,Tb11.v5.0838,Tb927.1.290,Tb927.1.370,Tb927.1.480,Tb927.11.1500,Tb927.11.1510,Tb927.2.1310,Tb927.2.170,Tb927.2.690,Tb927.2.950,Tb927.3.1490,Tb927.4.160,Tb927.6.130,Tb927.7.7540,Tb927.9.14540	1.73552	1.64155
Tb427_000808800.1-p1-CDS2	Tb427_000808800.1	unitig_284_Tb427v10	Tb09.v4.0013	retrotransposon hot spot (RHS) protein	RHS	Retrotransposon hot spot protein	30	-0.1928	NA	0	0.77	49.56	446	97	84	89	9	10	10	2.82	3.02	2.51	1.02	1.29	1.42	Tb09.v4.0013,Tb09.v4.0067,Tb11.0820,Tb11.1780,Tb11.v5.0214,Tb11.v5.0294,Tb11.v5.0295,Tb11.v5.0325,Tb11.v5.0326,Tb11.v5.0353,Tb11.v5.0489,Tb11.v5.0532,Tb11.v5.0533,Tb11.v5.0594,Tb11.v5.0624,Tb11.v5.0670,Tb11.v5.0693,Tb11.v5.0839,Tb927.1.120,Tb927.1.180,Tb927.1.190,Tb927.1.220,Tb927.1.70,Tb927.1.90,Tb927.10.110,Tb927.10.70,Tb927.2.100,Tb927.2.1120,Tb927.2.1180,Tb927.2.1210,Tb927.2.270,Tb927.2.280,T…	1.7866	1.64155
Tb427_000703800.1-p1-CDS2	Tb427_000703800.1	unitig_2078_Tb427v10	Tb10.v4.0215	hypothetical protein	ZUnknown	hypothetical protein, conserved	32	-0.0406	NA	0	0.97	14.6	73	114	63	105	5	9	16	3.32	2.26	2.96	0.57	1.16	2.28	Tb10.v4.0215,Tb927.9.15820	1.81147	1.64155
Tb427_000737300.1-p1-CDS3	Tb427_000737300.1	unitig_2217_Tb427v10	Tb05.5K5.180	GRESAG 4 receptor-type adenylate cyclase	GRESAG	hypothetical protein, conserved	23	-0.0444	NA	0	0.65	14	224	42	43	61	16	8	9	1.22	1.54	1.72	1.82	1.03	1.28	Tb05.5K5.180,Tb05.5K5.190,Tb09.v4.0009,Tb11.v5.0209,Tb11.v5.0217,Tb11.v5.0281,Tb11.v5.0379,Tb11.v5.0380,Tb11.v5.0424,Tb11.v5.0425,Tb11.v5.0429,Tb11.v5.0431,Tb11.v5.0456,Tb11.v5.0470,Tb11.v5.0484,Tb11.v5.0546,Tb11.v5.0576,Tb11.v5.0654,Tb11.v5.0784,Tb11.v5.0821,Tb11.v5.0830,Tb11.v5.0864,Tb11.v5.0865,Tb11.v5.1015,Tb11.v5.1016,Tb927.10.13040,Tb927.10.16000,Tb927.10.16190,Tb927.10.2430,Tb927.11.13740,…	1.85599	1.64155
Tb427_000737300.1-p1-CDS5	Tb427_000737300.1	unitig_2217_Tb427v10	Tb05.5K5.180	GRESAG 4 receptor-type adenylate cyclase	GRESAG	hypothetical protein, conserved	32	0.191	NA	0	1.2	19.88	318	75	52	61	16	13	18	2.18	1.87	1.72	1.82	1.68	2.56	Tb05.5K5.180,Tb05.5K5.190,Tb09.v4.0009,Tb11.v5.0209,Tb11.v5.0217,Tb11.v5.0281,Tb11.v5.0379,Tb11.v5.0380,Tb11.v5.0424,Tb11.v5.0425,Tb11.v5.0429,Tb11.v5.0431,Tb11.v5.0456,Tb11.v5.0470,Tb11.v5.0484,Tb11.v5.0546,Tb11.v5.0576,Tb11.v5.0654,Tb11.v5.0784,Tb11.v5.0821,Tb11.v5.0830,Tb11.v5.0864,Tb11.v5.0865,Tb11.v5.1015,Tb11.v5.1016,Tb927.10.13040,Tb927.10.16000,Tb927.10.16190,Tb927.10.2430,Tb927.11.13740,…	2.14405	1.64155
Tb427_000688300.1-p1-CDS1	Tb427_000688300.1	unitig_1928_Tb427v10	Tb09.v4.0013	retrotransposon hot spot (RHS) protein	RHS	Retrotransposon hot spot protein	31	-0.1904	NA	0	0.76	65.75	1052	107	80	61	16	11	9	3.11	2.87	1.72	1.82	1.42	1.28	Tb09.v4.0013,Tb09.v4.0067,Tb11.0820,Tb11.1780,Tb11.v5.0214,Tb11.v5.0294,Tb11.v5.0295,Tb11.v5.0325,Tb11.v5.0326,Tb11.v5.0353,Tb11.v5.0489,Tb11.v5.0532,Tb11.v5.0533,Tb11.v5.0594,Tb11.v5.0624,Tb11.v5.0670,Tb11.v5.0693,Tb11.v5.0839,Tb927.1.120,Tb927.1.180,Tb927.1.190,Tb927.1.220,Tb927.1.70,Tb927.1.90,Tb927.10.110,Tb927.10.70,Tb927.2.100,Tb927.2.1120,Tb927.2.1180,Tb927.2.1210,Tb927.2.270,Tb927.2.280,T…	2.16027	1.64155
Tb427_000757600.1-p1-CDS2	Tb427_000757600.1	unitig_2333_Tb427v10	Tb927.5.296b	hypothetical protein, Zinc finger domain, MOP domain	ZUnknown	hypothetical protein	32	-0.1676	NA	0	0.84	9.31	121	120	77	73	13	12	10	3.49	2.76	2.06	1.48	1.55	1.42	Tb927.5.296b	2.20477	1.64155
Tb427_000819900.1-p1-CDS1	Tb427_000819900.1	unitig_303_Tb427v10	Tb09.v4.0152	hypothetical protein	ZUnknown	hypothetical protein, conserved	30	0.1814	NA	0	1.12	11.71	164	65	46	69	14	11	18	1.89	1.65	1.95	1.59	1.42	2.56	Tb09.v4.0152,Tb927.11.17830,Tb927.9.760	2.23266	1.64155
Tb427_000644600.1-p1-CDS2	Tb427_000644600.1	unitig_1835_Tb427v10	Tb05.5K5.180	GRESAG 4 receptor-type adenylate cyclase	GRESAG	Adenylate and Guanylate cyclase catalytic domain containing protein	31	-0.0284	NA	0	0.98	57.4	287	89	78	106	5	15	11	2.59	2.8	2.99	0.57	1.93	1.57	Tb05.5K5.180,Tb05.5K5.190,Tb09.v4.0009,Tb11.v5.0209,Tb11.v5.0217,Tb11.v5.0281,Tb11.v5.0379,Tb11.v5.0380,Tb11.v5.0424,Tb11.v5.0425,Tb11.v5.0429,Tb11.v5.0431,Tb11.v5.0456,Tb11.v5.0470,Tb11.v5.0484,Tb11.v5.0546,Tb11.v5.0576,Tb11.v5.0654,Tb11.v5.0784,Tb11.v5.0821,Tb11.v5.0830,Tb11.v5.0864,Tb11.v5.0865,Tb11.v5.1015,Tb11.v5.1016,Tb927.10.13040,Tb927.10.16000,Tb927.10.16190,Tb927.10.2430,Tb927.11.13740,…	2.47249	1.64155
Tb427_000808600.1-p1-CDS5	Tb427_000808600.1	unitig_284_Tb427v10	Tb927.2.300	DNA-directed RNA polymerase, pseudogene	Pseudogene	RNA polymerase Rpb2, domain 4/RNA polymerase Rpb2, domain 6	29	0.0571	NA	0	0.95	30.4	456	65	58	66	15	13	12	1.89	2.08	1.86	1.7	1.68	1.71	Tb927.2.300,Tb927.2.420,Tb927.2.460,Tb927.2.540,Tb927.4.230,Tb927.6.5190	2.61117	1.64155
Tb427_000500900.1-p1-CDS2	Tb427_000500900.1	Chr8_5A_Tb427v10	Tb09.v4.0013	retrotransposon hot spot (RHS) protein	RHS	Retrotransposon hot spot protein	27	0.0361	NA	0	0.89	6	54	59	48	90	9	7	16	1.72	1.72	2.54	1.02	0.9	2.28	Tb09.v4.0013,Tb09.v4.0067,Tb11.0820,Tb11.1780,Tb11.v5.0214,Tb11.v5.0294,Tb11.v5.0295,Tb11.v5.0325,Tb11.v5.0326,Tb11.v5.0353,Tb11.v5.0489,Tb11.v5.0532,Tb11.v5.0533,Tb11.v5.0594,Tb11.v5.0624,Tb11.v5.0670,Tb11.v5.0693,Tb11.v5.0839,Tb927.1.120,Tb927.1.180,Tb927.1.190,Tb927.1.220,Tb927.1.70,Tb927.1.90,Tb927.10.110,Tb927.10.70,Tb927.2.100,Tb927.2.1120,Tb927.2.1180,Tb927.2.1210,Tb927.2.270,Tb927.2.280,T…	1.1375	1.64616
Tb427_000745100.1-p1-CDS1	Tb427_000745100.1	unitig_2230_Tb427v10	Tb09.v4.0013	retrotransposon hot spot (RHS) protein	RHS	Retrotransposon hot spot protein	29	0.0377	NA	0	0.99	42.11	379	71	62	90	9	14	12	2.06	2.23	2.54	1.02	1.8	1.71	Tb09.v4.0013,Tb09.v4.0067,Tb11.0820,Tb11.1780,Tb11.v5.0214,Tb11.v5.0294,Tb11.v5.0295,Tb11.v5.0325,Tb11.v5.0326,Tb11.v5.0353,Tb11.v5.0489,Tb11.v5.0532,Tb11.v5.0533,Tb11.v5.0594,Tb11.v5.0624,Tb11.v5.0670,Tb11.v5.0693,Tb11.v5.0839,Tb927.1.120,Tb927.1.180,Tb927.1.190,Tb927.1.220,Tb927.1.70,Tb927.1.90,Tb927.10.110,Tb927.10.70,Tb927.2.100,Tb927.2.1120,Tb927.2.1180,Tb927.2.1210,Tb927.2.270,Tb927.2.280,T…	1.19535	1.64616
Tb427_000662000.1-p1-CDS2	Tb427_000662000.1	unitig_1863_Tb427v10	Tb09.v4.0013	retrotransposon hot spot (RHS) protein	RHS	Retrotransposon hot spot protein	28	-0.1215	NA	0	0.76	21.82	240	78	63	82	11	11	9	2.27	2.26	2.31	1.25	1.42	1.28	Tb09.v4.0013,Tb09.v4.0067,Tb11.0820,Tb11.1780,Tb11.v5.0214,Tb11.v5.0294,Tb11.v5.0295,Tb11.v5.0325,Tb11.v5.0326,Tb11.v5.0353,Tb11.v5.0489,Tb11.v5.0532,Tb11.v5.0533,Tb11.v5.0594,Tb11.v5.0624,Tb11.v5.0670,Tb11.v5.0693,Tb11.v5.0839,Tb927.1.120,Tb927.1.180,Tb927.1.190,Tb927.1.220,Tb927.1.70,Tb927.1.90,Tb927.10.110,Tb927.10.70,Tb927.2.100,Tb927.2.1120,Tb927.2.1180,Tb927.2.1210,Tb927.2.270,Tb927.2.280,T…	1.28096	1.64616
Tb427_020005000.1-p1-CDS3	Tb427_020005000.1	Chr2_core_Tb427v10	Tb10.v4.0258	hypothetical protein	ZUnknown	hypothetical protein	29	-0.0826	NA	0	0.84	1	6	87	66	102	6	11	11	2.53	2.37	2.88	0.68	1.42	1.57	Tb10.v4.0258	1.47508	1.64616
Tb427_110087400.1-p1-CDS2	Tb427_110087400.1	Chr11_core_Tb427v10	Tb927.11.7990	hypothetical protein	ZUnknown	hypothetical protein, conserved	26	0.0149	NA	0	0.81	1	18	62	42	54	18	8	13	1.8	1.51	1.52	2.04	1.03	1.85	Tb927.11.7990	1.7137	1.64616
Tb427_070075600.1-p1-CDS1	Tb427_070075600.1	Chr7_core_Tb427v10	#N/A	#N/A	#N/A	#N/A	37	-0.3416	NA	0	0.64	47.22	425	170	121	90	9	10	7	4.94	4.34	2.54	1.02	1.29	1	#N/A	1.76553	1.64616
Tb427_000707700.1-p1-CDS4	Tb427_000707700.1	unitig_2087_Tb427v10	Tb927.2.300	DNA-directed RNA polymerase, pseudogene	Pseudogene	RNA polymerase Rpb2, domain 4/RNA polymerase Rpb2, domain 6	25	-0.1821	NA	0	0.61	42.67	512	65	58	78	12	8	8	1.89	2.08	2.2	1.36	1.03	1.14	Tb927.2.300,Tb927.2.420,Tb927.2.460,Tb927.2.540,Tb927.4.230,Tb927.6.5190	1.84398	1.64616
Tb427_000699800.1-p1-CDS2	Tb427_000699800.1	unitig_2014_Tb427v10	Tb05.5K5.180	GRESAG 4 receptor-type adenylate cyclase	GRESAG	Adenylate and Guanylate cyclase catalytic domain containing protein	29	0.0519	NA	0	0.97	27.69	360	79	53	74	13	17	9	2.3	1.9	2.09	1.48	2.19	1.28	Tb05.5K5.180,Tb05.5K5.190,Tb09.v4.0009,Tb11.v5.0209,Tb11.v5.0217,Tb11.v5.0281,Tb11.v5.0379,Tb11.v5.0380,Tb11.v5.0424,Tb11.v5.0425,Tb11.v5.0429,Tb11.v5.0431,Tb11.v5.0456,Tb11.v5.0470,Tb11.v5.0484,Tb11.v5.0546,Tb11.v5.0576,Tb11.v5.0654,Tb11.v5.0784,Tb11.v5.0821,Tb11.v5.0830,Tb11.v5.0864,Tb11.v5.0865,Tb11.v5.1015,Tb11.v5.1016,Tb927.10.13040,Tb927.10.16000,Tb927.10.16190,Tb927.10.2430,Tb927.11.13740,…	2.07382	1.64616
Tb427_000348300.1-p1-CDS2	Tb427_000348300.1	Chr4_5B_Tb427v10	Tb927.2.300	DNA-directed RNA polymerase, pseudogene	Pseudogene	RNA polymerase Rpb2, domain 4/RNA polymerase Rpb2, domain 6	30	0.0541	NA	0	0.99	66.93	937	77	57	70	14	13	13	2.24	2.05	1.98	1.59	1.68	1.85	Tb927.2.300,Tb927.2.420,Tb927.2.460,Tb927.2.540,Tb927.4.230,Tb927.6.5190	2.11437	1.64616
Tb427_000334400.1-p1-CDS1	Tb427_000334400.1	Chr4_3A_Tb427v10	Tb11.v5.1020	retrotransposon hot spot (RHS) protein	RHS	hypothetical protein, conserved	37	0.0891	NA	0	1.28	49.6	496	100	86	86	10	19	15	2.91	3.09	2.43	1.14	2.45	2.13	Tb11.v5.1020,Tb927.1.240,Tb927.1.500,Tb927.10.16200,Tb927.11.18610,Tb927.11.18630	2.13422	1.64616
Tb427_000115400.1-p1-CDS1	Tb427_000115400.1	Chr11_3A_Tb427v10	Tb11.v5.1020	retrotransposon hot spot (RHS) protein	RHS	Endonuclease-reverse transcriptase	25	-0.0213	NA	0	0.73	20.31	325	68	31	62	16	8	11	1.98	1.11	1.75	1.82	1.03	1.57	Tb11.v5.1020,Tb927.1.240,Tb927.1.500,Tb927.10.16200,Tb927.11.18610,Tb927.11.18630	1.33342	1.65076
Tb427_000734800.1-p1-CDS2	Tb427_000734800.1	unitig_2213_Tb427v10	Tb927.1.270	hypothetical protein	ZUnknown	hypothetical protein, conserved	32	-0.0306	NA	0	0.98	54.5	545	106	62	86	10	15	11	3.08	2.23	2.43	1.14	1.93	1.57	Tb927.1.270,Tb927.2.1250,Tb927.2.650,Tb927.2.900,Tb927.4.120	1.3505	1.65076
Tb427_060030200.1-p1-CDS6	Tb427_060030200.1	Chr6_core_Tb427v10	Tb927.6.2530	hypothetical protein	ZUnknown	hypothetical protein, conserved	27	-0.2511	NA	0	0.6	1	14	92	66	70	14	11	5	2.68	2.37	1.98	1.59	1.42	0.71	Tb927.6.2530	1.76553	1.65076
Tb427_000734700.1-p1-CDS5	Tb427_000734700.1	unitig_2213_Tb427v10	Tb05.5K5.180	GRESAG 4 receptor-type adenylate cyclase	GRESAG	Adenylate and Guanylate cyclase catalytic domain containing protein	25	-0.0588	NA	0	0.71	33.25	399	66	41	79	12	11	8	1.92	1.47	2.23	1.36	1.42	1.14	Tb05.5K5.180,Tb05.5K5.190,Tb09.v4.0009,Tb11.v5.0209,Tb11.v5.0217,Tb11.v5.0281,Tb11.v5.0379,Tb11.v5.0380,Tb11.v5.0424,Tb11.v5.0425,Tb11.v5.0429,Tb11.v5.0431,Tb11.v5.0456,Tb11.v5.0470,Tb11.v5.0484,Tb11.v5.0546,Tb11.v5.0576,Tb11.v5.0654,Tb11.v5.0784,Tb11.v5.0821,Tb11.v5.0830,Tb11.v5.0864,Tb11.v5.0865,Tb11.v5.1015,Tb11.v5.1016,Tb927.10.13040,Tb927.10.16000,Tb927.10.16190,Tb927.10.2430,Tb927.11.13740,…	1.95233	1.65076
Tb427_030037000.1-p1-CDS9	Tb427_030037000.1	Chr3_core_Tb427v10	Tb11.v5.1020	retrotransposon hot spot (RHS) protein	RHS	hypothetical protein, conserved	25	-0.0339	NA	0	0.73	29.14	408	53	46	71	14	7	12	1.54	1.65	2	1.59	0.9	1.71	Tb11.v5.1020,Tb927.1.240,Tb927.1.500,Tb927.10.16200,Tb927.11.18610,Tb927.11.18630	1.95606	1.65076
Tb427_000506300.1-p1-CDS1	Tb427_000506300.1	Chr8_5A_Tb427v10	Tb05.5K5.490	VSG pseudogene	VSG	Trypanosomal VSG domain/Trypanosome variant surface glycoprotein C-terminal domain containing protein	26	-0.0778	NA	0	0.72	1	11	64	50	83	11	8	11	1.86	1.8	2.34	1.25	1.03	1.57	Tb05.5K5.490,Tb08.27P2.710,Tb11.0950,Tb11.1460,Tb11.v5.0595,Tb927.11.17170,Tb927.11.18420,Tb927.11.18440,Tb927.11.18930,Tb927.9.17180,Tb927.9.270	2.16993	1.65076
Tb427_070066200.1-p1-CDS1	Tb427_070066200.1	Chr7_core_Tb427v10	Tb927.7.6010	hypothetical protein	ZUnknown	hypothetical protein, conserved	28	-0.0678	NA	0	0.83	2.18	24	69	69	83	11	12	10	2.01	2.48	2.34	1.25	1.55	1.42	Tb927.7.6010,Tb927.7.6030	2.24793	1.65076
Tb427_000806000.1-p1-CDS3	Tb427_000806000.1	unitig_278_Tb427v10	Tb927.2.300	DNA-directed RNA polymerase, pseudogene	Pseudogene	RNA polymerase Rpb2, domain 4	28	-0.1286	NA	0	0.76	5.33	32	97	62	103	6	9	11	2.82	2.23	2.91	0.68	1.16	1.57	Tb927.2.300,Tb927.2.420,Tb927.2.460,Tb927.2.540,Tb927.4.230,Tb927.6.5190	2.34199	1.65076
Tb427_070085600.1-p1-CDS2	Tb427_070085600.1	Chr7_core_Tb427v10	Tb09.v4.0013	retrotransposon hot spot (RHS) protein	RHS	Retrotransposon hot spot protein	32	-0.1239	NA	0	0.87	24.75	198	99	82	95	8	11	12	2.88	2.94	2.68	0.91	1.42	1.71	Tb09.v4.0013,Tb09.v4.0067,Tb11.0820,Tb11.1780,Tb11.v5.0214,Tb11.v5.0294,Tb11.v5.0295,Tb11.v5.0325,Tb11.v5.0326,Tb11.v5.0353,Tb11.v5.0489,Tb11.v5.0532,Tb11.v5.0533,Tb11.v5.0594,Tb11.v5.0624,Tb11.v5.0670,Tb11.v5.0693,Tb11.v5.0839,Tb927.1.120,Tb927.1.180,Tb927.1.190,Tb927.1.220,Tb927.1.70,Tb927.1.90,Tb927.10.110,Tb927.10.70,Tb927.2.100,Tb927.2.1120,Tb927.2.1180,Tb927.2.1210,Tb927.2.270,Tb927.2.280,T…	1.37851	1.65535
Tb427_060005700.1-p1-CDS1	Tb427_060005700.1	Chr6_core_Tb427v10	Tb927.6.210	leucine-rich repeat protein LRRP, pseudogene	LRRP	hypothetical protein, conserved	28	0.2363	NA	0	1.16	1	10	53	36	87	10	17	14	1.54	1.29	2.46	1.14	2.19	1.99	Tb927.6.210	1.85997	1.65535
Tb427_000682700.1-p1-CDS2	Tb427_000682700.1	unitig_1912_Tb427v10	Tb09.v4.0013	retrotransposon hot spot (RHS) protein	RHS	Retrotransposon hot spot protein	27	-0.3459	NA	0	0.49	8.4	84	94	73	87	10	5	8	2.73	2.62	2.46	1.14	0.64	1.14	Tb09.v4.0013,Tb09.v4.0067,Tb11.0820,Tb11.1780,Tb11.v5.0214,Tb11.v5.0294,Tb11.v5.0295,Tb11.v5.0325,Tb11.v5.0326,Tb11.v5.0353,Tb11.v5.0489,Tb11.v5.0532,Tb11.v5.0533,Tb11.v5.0594,Tb11.v5.0624,Tb11.v5.0670,Tb11.v5.0693,Tb11.v5.0839,Tb927.1.120,Tb927.1.180,Tb927.1.190,Tb927.1.220,Tb927.1.70,Tb927.1.90,Tb927.10.110,Tb927.10.70,Tb927.2.100,Tb927.2.1120,Tb927.2.1180,Tb927.2.1210,Tb927.2.270,Tb927.2.280,T…	2.01792	1.65535
Tb427_000674000.1-p1-CDS1	Tb427_000674000.1	unitig_1900_Tb427v10	Tb09.v4.0013	retrotransposon hot spot (RHS) protein	RHS	Retrotransposon hot spot protein	33	0.3276	NA	0	1.36	35.94	611	63	50	59	17	18	18	1.83	1.8	1.67	1.93	2.32	2.56	Tb09.v4.0013,Tb09.v4.0067,Tb11.0820,Tb11.1780,Tb11.v5.0214,Tb11.v5.0294,Tb11.v5.0295,Tb11.v5.0325,Tb11.v5.0326,Tb11.v5.0353,Tb11.v5.0489,Tb11.v5.0532,Tb11.v5.0533,Tb11.v5.0594,Tb11.v5.0624,Tb11.v5.0670,Tb11.v5.0693,Tb11.v5.0839,Tb927.1.120,Tb927.1.180,Tb927.1.190,Tb927.1.220,Tb927.1.70,Tb927.1.90,Tb927.10.110,Tb927.10.70,Tb927.2.100,Tb927.2.1120,Tb927.2.1180,Tb927.2.1210,Tb927.2.270,Tb927.2.280,T…	2.35896	1.65535
Tb427_000806000.1-p1-CDS4	Tb427_000806000.1	unitig_278_Tb427v10	Tb927.2.300	DNA-directed RNA polymerase, pseudogene	Pseudogene	RNA polymerase Rpb2, domain 4	27	-0.1909	NA	0	0.64	8.57	60	105	53	100	7	9	8	3.05	1.9	2.82	0.79	1.16	1.14	Tb927.2.300,Tb927.2.420,Tb927.2.460,Tb927.2.540,Tb927.4.230,Tb927.6.5190	2.62994	1.65535
Tb427_060030200.1-p1-CDS2	Tb427_060030200.1	Chr6_core_Tb427v10	Tb927.6.2530	hypothetical protein	ZUnknown	hypothetical protein, conserved	27	-0.2648	NA	0	0.49	1	4	111	71	112	4	5	8	3.23	2.55	3.16	0.45	0.64	1.14	Tb927.6.2530	1.5008	1.65992
Tb427_000670300.1-p1-CDS1	Tb427_000670300.1	unitig_1891_Tb427v10	Tb09.v4.0013	retrotransposon hot spot (RHS) protein	RHS	Retrotransposon hot spot protein	22	-0.0391	NA	0	0.62	32.25	387	44	33	80	12	12	5	1.28	1.18	2.26	1.36	1.55	0.71	Tb09.v4.0013,Tb09.v4.0067,Tb11.0820,Tb11.1780,Tb11.v5.0214,Tb11.v5.0294,Tb11.v5.0295,Tb11.v5.0325,Tb11.v5.0326,Tb11.v5.0353,Tb11.v5.0489,Tb11.v5.0532,Tb11.v5.0533,Tb11.v5.0594,Tb11.v5.0624,Tb11.v5.0670,Tb11.v5.0693,Tb11.v5.0839,Tb927.1.120,Tb927.1.180,Tb927.1.190,Tb927.1.220,Tb927.1.70,Tb927.1.90,Tb927.10.110,Tb927.10.70,Tb927.2.100,Tb927.2.1120,Tb927.2.1180,Tb927.2.1210,Tb927.2.270,Tb927.2.280,T…	1.81147	1.65992
Tb427_000662000.1-p1-CDS1	Tb427_000662000.1	unitig_1863_Tb427v10	Tb09.v4.0013	retrotransposon hot spot (RHS) protein	RHS	Retrotransposon hot spot protein	33	0.2039	NA	0	1.24	37.75	453	65	65	80	12	16	17	1.89	2.33	2.26	1.36	2.06	2.42	Tb09.v4.0013,Tb09.v4.0067,Tb11.0820,Tb11.1780,Tb11.v5.0214,Tb11.v5.0294,Tb11.v5.0295,Tb11.v5.0325,Tb11.v5.0326,Tb11.v5.0353,Tb11.v5.0489,Tb11.v5.0532,Tb11.v5.0533,Tb11.v5.0594,Tb11.v5.0624,Tb11.v5.0670,Tb11.v5.0693,Tb11.v5.0839,Tb927.1.120,Tb927.1.180,Tb927.1.190,Tb927.1.220,Tb927.1.70,Tb927.1.90,Tb927.10.110,Tb927.10.70,Tb927.2.100,Tb927.2.1120,Tb927.2.1180,Tb927.2.1210,Tb927.2.270,Tb927.2.280,T…	1.85599	1.65992
Tb427_000677900.1-p1-CDS3	Tb427_000677900.1	unitig_1904_Tb427v10	Tb11.1790	retrotransposon hot spot protein (RHS, pseudogene)	RHS	Retrotransposon hot spot protein	28	-0.0079	NA	0	0.87	47.08	565	73	54	80	12	8	15	2.12	1.94	2.26	1.36	1.03	2.13	Tb11.1790,Tb11.v5.0567,Tb11.v5.0713,Tb927.1.420,Tb927.2.1080,Tb927.2.1170,Tb927.2.240,Tb927.4.250,Tb927.6.140	1.83188	1.66903
Tb427_000811700.1-p1-CDS4	Tb427_000811700.1	unitig_2963_Tb427v10	Tb11.v5.1020	retrotransposon hot spot (RHS) protein	RHS	Reverse transcriptase (RNA-dependent DNA polymerase)	27	0.0002	NA	0	0.83	15.21	213	64	50	72	14	11	11	1.86	1.8	2.03	1.59	1.42	1.57	Tb11.v5.1020,Tb927.1.240,Tb927.1.500,Tb927.10.16200,Tb927.11.18610,Tb927.11.18630	1.9222	1.66903
Tb427_000019300.1-p1-CDS1	Tb427_000019300.1	BES3_Tb427v10	Tb11.v5.1020	retrotransposon hot spot (RHS) protein	RHS	hypothetical protein, conserved	31	0.306	NA	0	1.28	37.53	638	52	45	60	17	14	20	1.51	1.62	1.69	1.93	1.8	2.85	Tb11.v5.1020,Tb927.1.240,Tb927.1.500,Tb927.10.16200,Tb927.11.18610,Tb927.11.18630	2.3505	1.66903
Tb427_010005200.1-p1-CDS1	Tb427_010005200.1	Chr1_core_Tb427v10	Tb927.1.520	VSG pseudogene,variant surface glycoprotein, fragment	VSG	Trypanosome variant surface glycoprotein C-terminal domain containing protein	31	0.1861	NA	0	1.18	2.08	25	80	46	80	12	21	11	2.33	1.65	2.26	1.36	2.71	1.57	Tb927.1.520	1.65076	1.67356
Tb427_000749300.1-p1-CDS6	Tb427_000749300.1	unitig_224_Tb427v10	Tb927.9.15740	hypothetical protein, conserved	ZUnknown	hypothetical protein, conserved	27	0.015	NA	0	0.86	2.08	25	57	57	80	12	12	11	1.66	2.05	2.26	1.36	1.55	1.57	Tb927.9.15740,Tb927.9.15770,Tb927.9.15800	1.45943	1.67807
Tb427_000747800.1-p1-CDS20	Tb427_000747800.1	unitig_2246_Tb427v10	Tb927.2.300	DNA-directed RNA polymerase, pseudogene	Pseudogene	RNA polymerase Rpb2, domain 6	29	-0.0127	NA	0	0.87	2.54	33	78	52	76	13	9	14	2.27	1.87	2.15	1.48	1.16	1.99	Tb927.2.300,Tb927.2.420,Tb927.2.460,Tb927.2.540,Tb927.4.230,Tb927.6.5190	1.91456	1.67807
Tb427_020007200.1-p1-CDS10	Tb427_020007200.1	Chr2_core_Tb427v10	Tb11.v5.1020	retrotransposon hot spot (RHS) protein	RHS	Reverse transcriptase (RNA-dependent DNA polymerase)	26	-0.054	NA	0	0.75	10.85	141	76	42	76	13	8	12	2.21	1.51	2.15	1.48	1.03	1.71	Tb11.v5.1020,Tb927.1.240,Tb927.1.500,Tb927.10.16200,Tb927.11.18610,Tb927.11.18630	2.05311	1.67807
Tb427_000583600.1-p1-CDS1	Tb427_000583600.1	Chr9_3A_Tb427v10	Tb927.1.270	hypothetical protein	ZUnknown	hypothetical protein, conserved	29	0.1179	NA	0	0.99	30.44	487	58	54	64	16	18	9	1.69	1.94	1.81	1.82	2.32	1.28	Tb927.1.270,Tb927.2.1250,Tb927.2.650,Tb927.2.900,Tb927.4.120	2.19849	1.67807
Tb427_000782300.1-p1-CDS3	Tb427_000782300.1	unitig_2491_Tb427v10	Tb927.2.300	DNA-directed RNA polymerase, pseudogene	Pseudogene	RNA polymerase Rpb2, domain 4	36	0.0797	NA	0	1.24	75.57	529	110	73	101	7	23	11	3.2	2.62	2.85	0.79	2.96	1.57	Tb927.2.300,Tb927.2.420,Tb927.2.460,Tb927.2.540,Tb927.4.230,Tb927.6.5190	2.24793	1.68257
Tb427_000680100.1-p1-CDS1	Tb427_000680100.1	unitig_190_Tb427v10	Tb927.11.17840	retrotransposon hot spot protein (RHS, pseudogene)	RHS	Retrotransposon hot spot protein	26	-0.2344	NA	0	0.53	39.5	237	79	73	105	6	4	10	2.3	2.62	2.96	0.68	0.52	1.42	Tb927.11.17840,Tb927.2.720,Tb927.2.980,Tb927.4.190,Tb927.5.160	2.5008	1.68257
[truncated: 26,825 more rows]
