# Supplementary material for: The trypanosome Variant Surface Glycoprotein mRNA is stabilized by an essential unconventional RNA-binding protein
Source: bioRxiv preprint, doi:10.1101/2020.10.08.331769, version 1 (2020-10-08)
Supplement: Supplemental Table 4 [file 331769_file06.xlsx]

## Sheet: Legend
RNASeq analysis of trypanosomes with and without RNAi targeting CFB2" Alignment to Lister 427 genome
RNAi was induced for 9 hours with 100 ng/ml tetracycline. Total RNA was prepared from cells with (samples 13 and 14) and without (samples 11 and 12) tetracycline, and from cells with no RNAi construct (P1 and P2). rRNNA was depleted using oligonucelotides and RNaseH. RNA was then fragmented and subjected to Illumina RNASeq. The unpaired reads were then aligned to the TREU927 (2016) genome. Each r…
geneID: The TREU927 gene ID
Annotation: from TritrypDB with manual additions and corrections. The annotation "putative" has been removed throughout.
Category: A single gene product category was manually assigned.
baseMean: base mean value from DeSeq2
log2FoldChange: log2 of the difference obtained using DeSeq2 after comparing the +tet samples with the remaining samples.
padj: likelihood of the null hypothesis (no difference) obtained using DeSeq2 after comparing the +tet samples with the remaining samples.
SHEET 1
Raw reads and RPM for all TREU927 genes. Note that because each read was allowed to align 20 ties, reads from multi-gene families are over-represented. "minus vs plus" is the average RPM for plus tet deivided by the average RPM for all controls. "Largest RPM >10" allows sorting to remove open reading frames with few reads. "Minus vs plus <0.5" means more than 2-fold less RPM after tet addition. "…
SHEET 2
Analysis using a set of "unique" genes. For multi-gene families, a single representative is present. DeSeq2 analysis was done for four conditions: +tet versus -tet (columns E,F,M,N); +tet versus all the other samples (columns G,H,P,Q); +tet versus parental (columns I,J,S,T); and -tet verses parental (columns K,L,T,U).
DOWN/UP This designates samples that have at least 1.3-fold difference between +tetracycline (RNAi induced) and the remainder, with Padj <0.05. Binary designation, 1 is positive and 0 is negative. Colour codes on the data are: >2x down; >1.3x down; >1.3x up; >2x up

## Sheet: 1. Reads 927
GeneID	Annotation	Read ploidy	Parental1 20x align	Parental2 20x align	11_reads 20x align	12 reads 20x align	13 reads 20x align	14_reads 20x align	Parental1 1x	Parental2 1x	11_reads 1x	12 reads 1x	13 reads 1x	14_reads 1x	Parental1 RPM 1x	Parental2 RPM 1x	11_RPM 1x	12 RPM 1x	13 RPM 1x	14_RPM 1x	minus vs plus	Largest RPM >10	Minus vs plus <0.5 or >2
Tb04.24M18.150	hypothetical protein, conserved	2.04	1356	1060	1341	243	237	208	665	520	657	119	116	102	22	21	22	20	20	20	0.93	1	0
Tb04.3I12.100	hypothetical protein	1	985	791	900	126	138	128	985	791	900	126	138	128	32	33	30	21	24	25	0.92	1	0
Tb05.30F7.410	hypothetical protein	1	12	14	36	10	6	3	12	14	36	10	6	3	0	1	1	2	1	1		0	0
Tb06.3A7.270	hypothetical protein, conserved	1	5532	4095	4852	975	878	789	5532	4095	4852	975	878	789	182	169	159	160	151	153	0.94	1	0
Tb06.3A7.960	hypothetical protein	1	2968	2138	2567	479	517	472	2968	2138	2567	479	517	472	97	88	84	79	89	91	1.09	1	0
Tb07.26A24.210	hypothetical protein	2.01	658	514	796	95	115	101	327	256	396	47	57	50	11	11	13	8	10	10	0.91	1	0
Tb07.30D13.110	hypothetical protein, conserved (pseudogene)	11.19	15605	11246	15910	1914	2221	1947	1395	1005	1422	171	198	174	46	41	47	28	34	34	0.89	1	0
Tb07.30D13.130	hypothetical protein, conserved (pseudogene)	17.15	13903	10448	14309	2351	2098	2110	811	609	834	137	122	123	27	25	27	23	21	24	0.82	1	0
Tb07.30D13.160	hypothetical protein, conserved (pseudogene)	7.56	15624	11259	15928	1921	2221	1948	2067	1489	2107	254	294	258	68	61	69	42	51	50	0.91	1	0
Tb07.30D13.180	hypothetical protein, conserved (pseudogene)	6.11	15736	11970	16250	2608	2395	2390	2575	1959	2660	427	392	391	85	81	87	70	68	76	0.86	1	0
Tb07.30D13.60	hypothetical protein, conserved (pseudogene)	7.67	15639	11267	15941	1923	2221	1951	2039	1469	2078	251	290	254	67	61	68	41	50	49	0.91	1	0
Tb07.30D13.80	hypothetical protein, conserved (pseudogene)	15.09	16615	12576	17289	2717	2525	2517	1101	833	1146	180	167	167	36	34	38	30	29	32	0.84	1	0
Tb11.01.1680.v5	polyubiquitin, putative	21.8	686375	538087	901941	159734	190018	166641	31485	24683	41373	7327	8716	7644	1034	1017	1358	1205	1501	1481	1.17	1	0
Tb11.01.2730	hypothetical protein, conserved	2.82	41362	30488	41994	6431	6792	6022	14667	10811	14891	2280	2409	2135	481	446	489	375	415	414	0.96	1	0
Tb11.01.6240	ESAG2, putative	8.58	4501	4092	6323	895	1411	1158	525	477	737	104	164	135	17	20	24	17	28	26	1.33	1	0
Tb11.01.6241	expression site-associated gene (ESAG) protein, putative	8.05	4501	4092	6324	895	1411	1158	559	508	786	111	175	144	18	21	26	18	30	28	1.33	1	0
Tb11.01.6250	ESAG11, putative	2.67	4451	4200	6084	1015	1206	986	1667	1573	2279	380	452	369	55	65	75	62	78	72	1.13	1	0
Tb11.01.6251	expression site-associated gene 11 (ESAG11) protein, putative	4.34	4346	4125	5952	1001	1178	959	1001	950	1371	231	271	221	33	39	45	38	47	43	1.12	1	0
Tb11.02.5050b	protein kinase, putative	1.99	4857	3711	4506	769	856	710	2441	1865	2264	386	430	357	80	77	74	63	74	69	1.07	1	0
Tb11.02.5060b	SNF2 DNA repair protein, putative	2	4048	2920	3665	704	626	572	2024	1460	1833	352	313	286	66	60	60	58	54	55	0.91	1	0
Tb11.02.5070b	hypothetical protein, conserved	2.04	1412	1247	1367	288	268	237	692	611	670	141	131	116	23	25	22	23	23	22	1	1	0
Tb11.02.5080b	Endoplasmic Reticulum-Golgi Intermediate Compartment (ERGIC)/Endoplasmic reticulum vesicle transporter, putative	1.99	4521	3516	4296	661	841	695	2272	1767	2159	332	423	349	75	73	71	55	73	68	1.15	1	0
Tb11.02.5090	TGS1, trimethylation of m7G cap of snRNAs and snoRNAs.	1.97	953	747	1097	141	149	136	484	379	557	72	76	69	16	16	18	12	13	13	0.84	1	0
Tb11.02.5090b	proliferator-activated receptor-interacting protein (PRIP) interacting protein (PIMT), putative, pseudogene	2.04	953	747	1097	141	149	136	467	366	538	69	73	67	15	15	18	11	13	13	0.87	1	0
Tb11.02.5100b	hypothetical protein, conserved	1.98	1640	1118	1611	255	249	222	828	565	814	129	126	112	27	23	27	21	22	22	0.9	1	0
Tb11.02.5105	POMP15	1.96	804	692	851	151	188	125	410	353	434	77	96	64	13	15	14	13	17	12	1.21	1	0
Tb11.02.5105b	hypothetical protein, conserved	2.06	804	692	851	151	188	125	390	336	413	73	91	61	13	14	14	12	16	12	1.19	1	0
Tb11.02.5110b	origin recognition complex subunit 1 (ORC1), putative,cell division cycle 6 (CDC6), putative	2.02	1485	1100	1380	253	242	196	735	545	683	125	120	97	24	22	22	21	21	19	0.95	1	0
Tb11.02.5120b	mitochondrial edited mRNA stability factor 1 subunit, putative	2.01	4740	3700	4522	778	754	769	2358	1841	2250	387	375	383	77	76	74	64	65	74	0.94	1	0
Tb11.02.5130b	neurobeachin/beige protein, putative (fragment)	2.03	4463	3458	4521	755	796	697	2199	1703	2227	372	392	343	72	70	73	61	68	66	1.01	1	0
Tb11.02.5360	hypothetical protein, conserved	2.13	1094	886	1297	221	208	230	514	416	609	104	98	108	17	17	20	17	17	21	0.89	1	0
Tb11.02.5360b	hypothetical protein, conserved	1.89	1094	886	1299	221	208	230	579	469	687	117	110	122	19	19	23	19	19	24	0.88	1	0
Tb11.02.5370	hypothetical protein, conserved	1.98	1116	829	1129	177	207	182	564	419	570	89	105	92	19	17	19	15	18	18	1.03	1	0
Tb11.02.5370b	hypothetical protein, conserved	2.03	1116	829	1129	177	207	182	550	408	556	87	102	90	18	17	18	14	18	17	1.09	1	0
Tb11.02.5380	RRP44	2.17	5366	4100	5071	928	859	810	2473	1889	2337	428	396	373	81	78	77	70	68	72	0.92	1	0
Tb11.02.5380b	exosome complex exonuclease RRP44p homologue, putative	1.86	5367	4101	5072	928	860	810	2885	2205	2727	499	462	435	95	91	90	82	80	84	0.92	1	0
Tb11.02.5390	mRNA processing protein, putative	1.96	5486	4194	5146	1076	878	858	2799	2140	2626	549	448	438	92	88	86	90	77	85	0.87	1	0
Tb11.02.5390b	Guide RNA binding complex protein 4	2.05	5486	4194	5145	1076	878	858	2676	2046	2510	525	428	419	88	84	82	86	74	81	0.88	1	0
Tb11.02.5400	cystathionine beta-synthase, putative	1.78	1496	1128	1136	263	224	186	840	634	638	148	126	104	28	26	21	24	22	20	0.96	1	0
Tb11.02.5400b	cystathionine beta-synthase, putative	2.29	1495	1128	1136	260	224	185	653	493	496	114	98	81	21	20	16	19	17	16	0.94	1	0
Tb11.02.5410	SUMO activating enzyme AOS1	2.04	1003	816	1023	173	173	126	492	400	501	85	85	62	16	16	16	14	15	12	0.97	1	0
Tb11.02.5410b	ubiquitin activating enzyme, putative	1.97	1003	816	1023	173	173	126	509	414	519	88	88	64	17	17	17	14	15	12	0.94	1	0
Tb11.02.5420	NADPH--cytochrome p450 reductase, putative (CPR)	3.32	7093	5683	6975	1206	1460	1211	2136	1712	2101	363	440	365	70	71	69	60	76	71	1.17	1	0
Tb11.02.5420b	NADPH-cytochrome p450 reductase, putative	2.26	7098	5688	6979	1206	1462	1214	3141	2517	3088	534	647	537	103	104	101	88	111	104	1.17	1	0
Tb11.02.5430	hypothetical protein, conserved	2.01	1776	1687	1866	422	411	336	884	839	928	210	204	167	29	35	30	35	35	32	1.06	1	0
Tb11.02.5430b	hypothetical protein, conserved	2	1776	1687	1866	422	411	336	888	844	933	211	206	168	29	35	31	35	35	33	1.04	1	0
Tb11.02.5440	hypothetical protein, conserved	1.97	1840	1461	1901	454	365	343	934	742	965	230	185	174	31	31	32	38	32	34	0.9	1	0
Tb11.02.5440b	hypothetical protein, conserved	2.03	1840	1461	1901	454	365	343	906	720	936	224	180	169	30	30	31	37	31	33	0.9	1	0
Tb11.09.0001	VSG pseudogene		0	1	0	0	1	0							0	0	0	0	0	0		0	0
Tb11.1320	hypothetical protein		0	0	0	0	0	0							0	0	0	0	0	0		0	0
Tb11.1330	hypothetical protein		0	0	0	0	0	0							0	0	0	0	0	0		0	0
Tb11.1340	hypothetical protein		0	0	0	0	0	0							0	0	0	0	0	0		0	0
Tb11.1350	hypothetical protein		0	0	0	0	0	0							0	0	0	0	0	0		0	0
Tb11.1360	hypothetical protein		0	0	0	0	0	0							0	0	0	0	0	0		0	0
Tb11.1370	hypothetical protein	3.99	2574	1995	2372	476	478	392	645	500	594	119	120	98	21	21	19	20	21	19	1.05	1	0
Tb11.1380	hypothetical protein	3.75	7553	6743	8581	1727	1587	1440	2014	1798	2288	461	423	384	66	74	75	76	73	74	0.96	1	0
Tb11.1390	hypothetical protein	3.07	1575	1104	1419	325	325	270	513	360	462	106	106	88	17	15	15	17	18	17	1.09	1	0
Tb11.1400	hypothetical protein	4.8	3884	3129	3621	752	732	679	809	652	754	157	153	141	27	27	25	26	26	27	1	1	0
Tb11.1410	Ring finger domain containing protein, putative	3.69	1840	1400	1580	312	306	259	499	379	428	85	83	70	16	16	14	14	14	14	0.97	1	0
Tb11.1430	VSG pseudogene		0	1	0	0	0	0							0	0	0	0	0	0		0	0
Tb11.1431	variant surface glycoprotein (VSG, pseudogene), putative		0	1	0	0	0	0							0	0	0	0	0	0		0	0
Tb11.1440	VSG pseudogene		1	1	1	0	0	0							0	0	0	0	0	0		0	0
Tb11.1441	variant surface glycoprotein (VSG, pseudogene), fragment		1	1	1	0	0	0							0	0	0	0	0	0		0	0
Tb11.1450	variant surface glycoprotein (VSG), putative		0	2	1	0	1	0							0	0	0	0	0	0		0	0
Tb11.1451	variant surface glycoprotein (VSG), putative		0	2	1	0	1	0							0	0	0	0	0	0		0	0
Tb11.1480	variant surface glycoprotein (VSG), putative		0	0	1	0	0	0							0	0	0	0	0	0		0	0
Tb11.1480b	variant surface glycoprotein (VSG), frameshifted		0	0	1	0	0	0							0	0	0	0	0	0		0	0
Tb11.15.0005	hypothetical protein, conserved (pseudogene)		2	3	1	0	0	1							0	0	0	0	0	0		0	0
Tb11.15.0005b	hypothetical protein, conserved, degenerate	9	11	7	11	0	0	1	1	1	1	0	0	0	0	0	0	0	0	0		0	0
Tb11.15.0006	VSG pseudogene, frameshifted		0	0	0	0	0	0							0	0	0	0	0	0		0	0
Tb11.15.0006b	variant surface glycoprotein (VSG), frameshifted		0	0	0	0	0	0							0	0	0	0	0	0		0	0
Tb11.15.0007	VSG pseudogene, point mutation		0	0	0	1	0	0							0	0	0	0	0	0		0	0
Tb11.15.0007b	variant surface glycoprotein (VSG), point mutation		0	0	0	1	0	0							0	0	0	0	0	0		0	0
Tb11.15.0008	ESAG3 pseudogene	38.08	7103	6430	9210	973	1493	1184	187	169	242	26	39	31	6	7	8	4	7	6	1.08	0	0
Tb11.15.0008b	expression site-associated gene 3 (ESAG3), degenerate and frameshifted	625.63	1697	1654	2178	180	269	256	3	3	3	0	0	0	0	0	0	0	0	0	0	0	0
Tb11.1540	hypothetical protein		0	1	0	0	0	0							0	0	0	0	0	0		0	0
Tb11.1550	hypothetical protein		0	0	0	0	0	0							0	0	0	0	0	0		0	0
Tb11.1610	VSG pseudogene		0	0	1	0	0	0							0	0	0	0	0	0		0	0
Tb11.1620	VSG pseudogene		1	1	0	0	0	0							0	0	0	0	0	0		0	0
Tb11.1720	VSG pseudogene	1	3	5	2	0	1	1	3	5	2	0	1	1	0	0	0	0	0	0		0	0
Tb11.1751	hypothetical protein (pseudogene)	26.64	5294	3724	7830	1139	701	612	199	140	294	43	26	23	7	6	10	7	4	4	0.44	0	2
Tb11.1780	retrotransposon hot spot protein (RHS1, pseudogene), putative	24.47	36929	28155	33498	5025	4750	4290	1509	1151	1369	205	194	175	50	47	45	34	33	34	0.83	1	0
Tb11.1790	retrotransposon hot spot protein (RHS, pseudogene), putative	12.72	26202	20056	24472	3818	3762	3232	2060	1577	1924	300	296	254	68	65	63	49	51	49	0.9	1	0
Tb11.1810b	retrotransposon hot spot protein (RHS, pseudogene), putative	5.65	35881	28019	33697	5220	5159	4695	6351	4959	5964	924	913	831	208	204	196	152	157	161	0.9	1	0
Tb11.57.0047	VSG pseudogene, point mutation		0	1	1	1	0	0							0	0	0	0	0	0		0	0
Tb11.57.0047b	variant surface glycoprotein (VSG), point mutation		0	1	1	1	0	0							0	0	0	0	0	0		0	0
Tb11.57.0049	VSG pseudogene, degenerate		1	0	1	1	1	0							0	0	0	0	0	0		0	0
Tb11.57.0050	ESAG3 pseudogene	271.22	4507	3337	4543	439	720	578	17	12	17	2	3	2	1	0	1	0	1	0	1	0	0
Tb11.v4.0039	VSG pseudogene	56.75	91	68	98	24	10	13	2	1	2	0	0	0	0	0	0	0	0	0	0	0	0
Tb11.v4.0039b	variant surface glycoprotein (VSG, pseudogene), putative		7	4	10	0	0	2							0	0	0	0	0	0		0	0
Tb11.v4.0041	VSG pseudogene		0	0	0	0	0	0							0	0	0	0	0	0		0	0
Tb11.v4.0042	VSG pseudogene		2	0	0	0	0	0							0	0	0	0	0	0		0	0
Tb11.v4.0043	VSG pseudogene	3.75	7	4	20	6	4	4	2	1	5	2	1	1	0	0	0	0	0	0		0	0
Tb11.v4.0044	VSG pseudogene		1	4	1	0	1	1							0	0	0	0	0	0		0	0
Tb11.v4.0062	VSG pseudogene		1	1	0	1	0	0							0	0	0	0	0	0		0	0
Tb11.v5.0111	variant surface protein (VSG), putative		3	0	3	0	0	1							0	0	0	0	0	0		0	0
Tb11.v5.0112	variant surface protein (VSG), putative	1	1	2	4	0	0	0	1	2	4	0	0	0	0	0	0	0	0	0		0	0
Tb11.v5.0113	variant surface protein (VSG), putative		0	0	1	0	1	0							0	0	0	0	0	0		0	0
Tb11.v5.0114	variant surface glycoprotein (VSG), pseudogene		0	0	0	0	0	0							0	0	0	0	0	0		0	0
Tb11.v5.0115	variant surface protein (VSG), putative		0	0	0	0	0	0							0	0	0	0	0	0		0	0
Tb11.v5.0116	UDP-Gal or UDP-GlcNAc-dependent glycosyltransferase, putative		0	0	1	0	0	0							0	0	0	0	0	0		0	0
Tb11.v5.0117	variant surface protein (VSG), putative		0	0	1	0	0	0							0	0	0	0	0	0		0	0
Tb11.v5.0118	variant surface protein (VSG), putative		0	1	0	0	0	1							0	0	0	0	0	0		0	0
Tb11.v5.0119	variant surface glycoprotein (VSG), pseudogene	16.9	44	25	24	39	10	17	3	1	1	2	1	1	0	0	0	0	0	0	0	0	0
Tb11.v5.0120	variant surface protein (VSG), putative		0	2	1	0	0	0							0	0	0	0	0	0		0	0
Tb11.v5.0121	variant surface protein (VSG), putative		0	0	0	0	0	0							0	0	0	0	0	0		0	0
Tb11.v5.0122	variant surface protein (VSG), putative		3	3	7	0	1	0							0	0	0	0	0	0		0	0
Tb11.v5.0123	variant surface protein (VSG), putative		0	0	2	0	0	0							0	0	0	0	0	0		0	0
Tb11.v5.0124	variant surface protein (VSG), putative		0	0	1	0	0	0							0	0	0	0	0	0		0	0
Tb11.v5.0125	variant surface protein (VSG), putative		1	0	0	0	0	0							0	0	0	0	0	0		0	0
Tb11.v5.0126	expression site-associated gene 3 (ESAG3) protein, putative		427	379	369	62	23	51							0	0	0	0	0	0	0	0	0
Tb11.v5.0127	variant surface protein (VSG), putative		0	0	0	0	0	0							0	0	0	0	0	0		0	0
Tb11.v5.0128	variant surface protein (VSG), putative		0	0	0	0	0	0							0	0	0	0	0	0		0	0
Tb11.v5.0129	variant surface protein (VSG), putative	2.5	2	3	1	0	0	0	1	1	0	0	0	0	0	0	0	0	0	0		0	0
Tb11.v5.0130	variant surface protein (VSG), putative		0	0	1	0	0	0							0	0	0	0	0	0		0	0
Tb11.v5.0131	variant surface protein (VSG), putative		0	0	1	0	0	0							0	0	0	0	0	0		0	0
Tb11.v5.0132	variant surface protein (VSG), putative		0	0	0	0	0	0							0	0	0	0	0	0		0	0
Tb11.v5.0133	variant surface protein (VSG), putative		0	0	0	0	0	0							0	0	0	0	0	0		0	0
Tb11.v5.0134	variant surface glycoprotein (VSG), pseudogene		0	2	1	0	0	0							0	0	0	0	0	0		0	0
Tb11.v5.0135	variant surface protein (VSG), putative		1	0	0	0	0	0							0	0	0	0	0	0		0	0
Tb11.v5.0136	variant surface protein (VSG), putative		0	0	0	0	0	0							0	0	0	0	0	0		0	0
Tb11.v5.0137	variant surface protein, atypical (VSG), putative		0	0	0	0	0	0							0	0	0	0	0	0		0	0
Tb11.v5.0138	variant surface protein (VSG), putative		0	0	0	0	0	0							0	0	0	0	0	0		0	0
Tb11.v5.0139	variant surface protein (VSG), putative	1	1	1	1	0	0	0	1	1	1	0	0	0	0	0	0	0	0	0		0	0
Tb11.v5.0140	variant surface glycoprotein (VSG), pseudogene		0	0	1	0	0	0							0	0	0	0	0	0		0	0
Tb11.v5.0141	variant surface protein (VSG), putative		0	0	0	0	0	0							0	0	0	0	0	0		0	0
Tb11.v5.0142	variant surface protein (VSG), putative		0	0	1	0	0	0							0	0	0	0	0	0		0	0
Tb11.v5.0143	variant surface protein (VSG), putative		0	0	0	0	0	0							0	0	0	0	0	0		0	0
Tb11.v5.0144	variant surface protein (VSG), putative		0	0	0	0	0	0							0	0	0	0	0	0		0	0
Tb11.v5.0145	variant surface protein (VSG), putative	2	2	4	6	0	1	0	1	2	3	0	1	0	0	0	0	0	0	0		0	0
Tb11.v5.0146	chaperone protein DNAj, putative	2.02	2314	1909	2309	399	349	335	1146	945	1143	198	173	166	38	39	38	33	30	32	0.83	1	0
Tb11.v5.0147	Calponin homology (CH) domain containing protein, putative	1.96	3520	2677	3425	590	550	505	1796	1366	1747	301	281	258	59	56	57	49	48	50	0.9	1	0
Tb11.v5.0148	hypothetical protein, conserved	1.96	1568	1207	1494	281	281	284	800	616	762	143	143	145	26	25	25	24	25	28	1	1	0
Tb11.v5.0149	hypothetical protein, conserved	1.78	2738	2230	2912	406	483	423	1538	1253	1636	228	271	238	50	52	54	37	47	46	1.02	1	0
Tb11.v5.0150	SNF2 DNA repair protein, putative	2	6272	4884	6396	1136	1115	966	3136	2442	3198	568	558	483	103	101	105	93	96	94	0.96	1	0
Tb11.v5.0151	hypothetical protein, conserved	2.22	1583	1271	1723	239	262	237	713	573	776	108	118	107	23	24	25	18	20	21	0.91	1	0
Tb11.v5.0152	ribosomal RNA processing protein 4, putative	2.17	1438	1275	1600	203	247	218	663	588	737	94	114	100	22	24	24	15	20	19	1	1	0
Tb11.v5.0153	BarP protein, putative	1.69	1977	1437	1729	319	459	374	1170	850	1023	189	272	221	38	35	34	31	47	43	1.42	1	0
Tb11.v5.0154	WD domain, G-beta repeat, putative	2.1	7517	6410	7522	1476	1466	1171	3580	3052	3582	703	698	558	118	126	118	116	120	108	1.02	1	0
Tb11.v5.0155	hypothetical protein, conserved	2.33	553	457	603	107	128	95	237	196	259	46	55	41	8	8	9	8	9	8	1	0	0
Tb11.v5.0156	hypothetical protein, conserved	2.05	1264	1031	1103	304	237	240	617	503	538	148	116	117	20	21	18	24	20	23	0.93	1	0
Tb11.v5.0157	hypothetical protein, conserved	2.05	2640	2199	2380	492	440	372	1288	1073	1161	240	215	181	42	44	38	39	37	35	0.95	1	0
Tb11.v5.0158	hypothetical protein, conserved	2.03	2108	1552	1933	339	296	303	1038	765	952	167	146	149	34	32	31	27	25	29	0.85	1	0
Tb11.v5.0159	hypothetical protein, conserved	1.99	2718	2250	2744	560	631	486	1366	1131	1379	281	317	244	45	47	45	46	55	47	1.2	1	0
Tb11.v5.0160	cyclophilin-type peptidyl-prolyl cis-trans isomerase, putative	1.99	10734	8152	9759	1750	2905	2333	5394	4096	4904	879	1460	1172	177	169	161	145	251	227	1.64	1	2
Tb11.v5.0161	conserved hypothetical protein, putative	2.04	834	840	1085	185	201	168	409	412	532	91	99	82	13	17	17	15	17	16	1.03	1	0
Tb11.v5.0162	proteasome beta 6 subunit	1.91	3791	3089	3377	727	671	656	1985	1617	1768	381	351	343	65	67	58	63	60	66	0.98	1	0
Tb11.v5.0163	HD domain containing protein, putative	1.99	2403	1820	2007	408	365	348	1208	915	1009	205	183	175	40	38	33	34	32	34	0.94	1	0
Tb11.v5.0164	Trm112p-like protein, putative	1.97	902	722	887	142	172	154	458	366	450	72	87	78	15	15	15	12	15	15	1.07	1	0
Tb11.v5.0165	kinesin, putative	1.93	2201	1694	1896	349	347	324	1140	878	982	181	180	168	37	36	32	30	31	33	0.98	1	0
Tb11.v5.0166	hypothetical protein, conserved	2.07	1319	1065	1288	236	217	212	637	514	622	114	105	102	21	21	20	19	18	20	0.9	1	0
Tb11.v5.0167	hypothetical protein, conserved	2.02	884	754	755	158	118	147	438	373	374	78	58	73	14	15	12	13	10	14	0.77	1	0
Tb11.v5.0168	FHA domain containing protein, putative	2	1301	1083	1484	242	226	209	651	542	742	121	113	105	21	22	24	20	19	20	0.84	1	0
Tb11.v5.0169	hypothetical protein, conserved	2	1779	1363	1768	295	299	242	890	682	884	148	150	121	29	28	29	24	26	23	0.96	1	0
Tb11.v5.0170	hypothetical protein, conserved	2.01	5558	4390	5291	955	916	830	2765	2184	2632	475	456	413	91	90	86	78	79	80	0.96	1	0
Tb11.v5.0171	XRNA	2.06	10216	8315	10258	2141	1800	1539	4959	4036	4980	1039	874	747	163	166	163	171	151	145	0.9	1	0
Tb11.v5.0172	hypothetical protein, conserved	1.98	4703	3928	4141	1172	916	790	2375	1984	2091	592	463	399	78	82	69	97	80	77	0.96	1	0
Tb11.v5.0173	hypothetical protein, conserved	2.19	9484	6794	6702	1418	1216	1043	4331	3102	3060	647	555	476	142	128	100	106	96	92	0.93	1	0
Tb11.v5.0174	ribonuclease H1, putative	1.86	1324	1023	1299	243	225	199	712	550	698	131	121	107	23	23	23	22	21	21	0.91	1	0
Tb11.v5.0175	oligopeptidase B protein, putative	2.07	4824	3551	4481	896	832	689	2330	1715	2165	433	402	333	76	71	71	71	69	65	0.97	1	0
Tb11.v5.0176	NAD(p)-dependent steroid dehydrogenase-like protein	1.95	1098	847	1008	163	162	147	563	434	517	84	83	75	18	18	17	14	14	15	0.88	1	0
Tb11.v5.0177	hypothetical protein, conserved	2.03	2070	1663	2071	336	313	333	1020	819	1020	166	154	164	33	34	33	27	27	32	0.89	1	0
Tb11.v5.0178	glutamine synthetase, putative	2.05	1643	1139	1312	252	217	224	801	556	640	123	106	109	26	23	21	20	18	21	0.86	1	0
Tb11.v5.0179	hypothetical protein, conserved	2.02	2304	1709	2056	300	319	295	1141	846	1018	149	158	146	37	35	33	24	27	28	0.93	1	0
Tb11.v5.0180	hypothetical protein, conserved	1.98	4090	3228	4030	692	682	613	2066	1630	2035	349	344	310	68	67	67	57	59	60	0.94	1	0
Tb11.v5.0181	60S ribosomal protein L1	3.86	18560	15406	22559	4789	3902	3658	4808	3991	5844	1241	1011	948	158	164	192	204	174	184	0.88	1	0
Tb11.v5.0182	60S ribosomal protein L19	3.99	17971	14917	21773	4682	3808	3580	4504	3739	5457	1173	954	897	148	154	179	193	164	174	0.88	1	0
Tb11.v5.0183	hypothetical protein, conserved	1.98	1498	1089	1454	282	244	214	757	550	734	142	123	108	25	23	24	23	21	21	0.88	1	0
Tb11.v5.0184	hypothetical protein, conserved	1.96	2836	2261	2776	529	478	435	1447	1154	1416	270	244	222	47	48	46	44	42	43	0.92	1	0
Tb11.v5.0185	hypothetical protein, conserved	2.21	9884	7951	9056	1813	1572	1603	4472	3598	4098	820	711	725	147	148	135	135	122	141	0.9	1	0
Tb11.v5.0186	CLN3 protein, putative	2	1964	1553	1929	375	432	371	982	777	965	188	216	186	32	32	32	31	37	36	1.16	1	0
Tb11.v5.0187	hypothetical protein, conserved	2.01	3700	2834	3579	702	586	545	1841	1410	1781	349	292	271	60	58	58	57	50	53	0.86	1	0
Tb11.v5.0188	ATP-NAD kinase, putative	1.98	3496	2675	3288	620	572	564	1766	1351	1661	313	289	285	58	56	55	51	50	55	0.93	1	0
Tb11.v5.0189	Condensin complex subunit 2, putative	2.03	4121	3159	3897	696	620	609	2030	1556	1920	343	305	300	67	64	63	56	53	58	0.88	1	0
Tb11.v5.0190	protein kinase, putative	4.44	9616	7398	9318	1712	1981	1604	2166	1666	2099	386	446	361	71	69	69	63	77	70	1.16	1	0
Tb11.v5.0191	ELMO/CED-12 family, putative	2.09	2343	1856	2114	338	389	336	1121	888	1011	162	186	161	37	37	33	27	32	31	1.05	1	0
Tb11.v5.0192	B-box zinc finger, putative	1.98	1834	1414	1680	233	284	259	926	714	848	118	143	131	30	29	28	19	25	25	1.04	1	0
Tb11.v5.0193	hypothetical protein, conserved	1.98	1851	1463	1738	276	280	257	935	739	878	139	141	130	31	30	29	23	24	25	0.91	1	0
Tb11.v5.0194	hypothetical protein, conserved	2.02	9610	7329	7804	1480	1418	1272	4757	3628	3863	733	702	630	156	150	127	121	121	122	0.97	1	0
Tb11.v5.0195	STAG domain containing protein, putative	1.97	7552	5925	6517	1269	1214	1088	3834	3008	3308	644	616	552	126	124	109	106	106	107	0.98	1	0
Tb11.v5.0196	Proteasome subunit A N-terminal signature/Proteasome subunit, putative	1.78	3720	2989	3601	595	555	511	2090	1679	2023	334	312	287	69	69	66	55	54	56	0.89	1	0
Tb11.v5.0197	clathrin heavy chain, putative	2.02	27277	21326	27239	4975	6409	5178	13503	10557	13485	2463	3173	2563	443	435	443	405	546	497	1.29	1	0
Tb11.v5.0198	clathrin heavy chain, putative	2.07	26414	20735	26224	4685	6218	5134	12760	10017	12669	2263	3004	2480	419	413	416	372	517	481	1.31	1	0
Tb11.v5.0199	universal minicircle sequence binding protein, putative	3.65	8633	7050	10113	2298	1639	1471	2365	1932	2771	630	449	403	78	80	91	104	77	78	0.79	1	0
Tb11.v5.0200	proteasome beta 5 subunit, putative	1.98	4086	3242	4032	744	683	616	2064	1637	2036	376	345	311	68	67	67	62	59	60	0.91	1	0
Tb11.v5.0201	tRNA pseudouridine synthase A, putative	2.13	2615	2081	2263	412	429	378	1228	977	1062	193	201	177	40	40	35	32	35	34	1.03	1	0
Tb11.v5.0202	Protein of unknown function (DUF2419), putative	2.05	1647	1287	1596	308	277	285	803	628	779	150	135	139	26	26	26	25	23	27	0.88	1	0
Tb11.v5.0203	hypothetical protein, conserved	2.07	3406	2672	3179	587	540	510	1645	1291	1536	284	261	246	54	53	50	47	45	48	0.92	1	0
Tb11.v5.0204	Peptidase M76 family, putative	1.97	1177	950	1274	220	230	211	597	482	647	112	117	107	20	20	21	18	20	21	1	1	0
Tb11.v5.0205	hypothetical protein, conserved	2.05	2011	1590	1656	341	340	251	981	776	808	166	166	122	32	32	27	27	29	24	1.05	1	0
Tb11.v5.0206	phosphatidylinositolN-acetylglucosaminyltransferase, putative	2.02	1342	997	1214	238	212	203	664	494	601	118	105	100	22	20	20	19	18	19	0.9	1	0
Tb11.v5.0207	neurobeachin/beige protein, putative	2.03	17936	13380	15840	2862	2961	2590	8835	6591	7803	1410	1459	1276	290	272	256	232	251	247	1.03	1	0
Tb11.v5.0208	invariant surface glycoprotein, putative	4.43	9599	8178	9299	1911	2279	1913	2167	1846	2099	431	514	432	71	76	69	71	89	84	1.26	1	0
Tb11.v5.0209	Adenylate and Guanylate cyclase catalytic domain containing protein, putative	5.91	9174	6835	9278	1745	1653	1365	1552	1157	1570	295	280	231	51	48	52	48	48	45	0.95	1	0
Tb11.v5.0210	adenosine transporter, putative	2.02	1757	1427	2039	391	446	505	870	706	1009	194	221	250	29	29	33	32	38	48	1.15	1	0
Tb11.v5.0211	galactokinase-like protein, putative	2.13	342	234	334	54	36	46	161	110	157	25	17	22	5	5	5	4	3	4	0.6	0	0
Tb11.v5.0212	ribulose-phosphate 3-epimerase, putative	2	999	771	918	173	155	110	500	386	459	87	78	55	16	16	15	14	13	11	0.87	1	0
Tb11.v5.0213	variant surface protein (VSG), putative	1.96	1769	1684	2152	411	368	376	903	859	1098	210	188	192	30	35	36	35	32	37	0.89	1	0
Tb11.v5.0214	retrotransposon hot spot (RHS) protein, putative	7.76	34963	27288	32770	5052	5154	4467	4506	3516	4223	651	664	576	148	145	139	107	114	112	0.92	1	0
Tb11.v5.0215	iron/ascorbate oxidoreductase family protein, putative	4.1	4379	3278	3343	504	545	479	1068	800	815	123	133	117	35	33	27	20	23	23	0.96	1	0
Tb11.v5.0216	invariant surface glycoprotein, putative	3.23	8738	7404	8413	1704	2054	1753	2705	2292	2605	528	636	543	89	94	86	87	110	105	1.26	1	0
Tb11.v5.0217	receptor-type adenylate cyclase GRESAG 4, putative	5.26	4073	2901	4053	807	726	605	774	552	771	153	138	115	25	23	25	25	24	22	0.94	1	0
Tb11.v5.0218	hypothetical protein, conserved	2.01	10345	8204	9503	2018	1803	1699	5147	4082	4728	1004	897	845	169	168	155	165	154	164	0.96	1	0
Tb11.v5.0219	methyltransferase, putative	2.02	3953	3170	4096	684	670	571	1957	1569	2028	339	332	283	64	65	67	56	57	55	0.92	1	0
Tb11.v5.0220	hypothetical protein, conserved	2.03	1595	1219	1508	301	289	258	786	600	743	148	142	127	26	25	24	24	24	25	0.98	1	0
Tb11.v5.0221	transporter, putative	1.86	2425	2025	2716	426	566	531	1304	1089	1460	229	304	285	43	45	48	38	52	55	1.2	1	0
Tb11.v5.0222	NADH-ubiquinone oxidoreductase, mitochondrial, putative	2.22	2173	1640	1898	401	377	351	979	739	855	181	170	158	32	30	28	30	29	31	0.98	1	0
Tb11.v5.0223	BNR repeat-like domain/Concanavalin A-like lectin/glucanases superfamily, putative	2.08	1500	1228	1510	298	234	273	721	590	726	143	113	131	24	24	24	24	19	25	0.78	1	0
Tb11.v5.0224	invariant surface glycoprotein, putative	3.87	3258	2745	2931	491	604	519	842	709	757	127	156	134	28	29	25	21	27	26	1.15	1	0
Tb11.v5.0225	invariant surface glycoprotein, putative	2.76	4574	3593	3862	680	813	725	1657	1302	1399	246	295	263	54	54	46	40	51	51	1.17	1	0
Tb11.v5.0226	invariant surface glycoprotein, putative	2.03	1305	919	1121	194	260	206	643	453	552	96	128	101	21	19	18	16	22	20	1.26	1	0
Tb11.v5.0227	75 kDa invariant surface glycoprotein, putative	23.23	12777	13636	17472	3958	6273	5159	550	587	752	170	270	222	18	24	25	28	47	43	1.74	1	2
Tb11.v5.0228	75 kDa invariant surface glycoprotein, putative	7.01	23472	22399	28139	6046	9739	7972	3348	3195	4014	862	1389	1137	110	132	132	142	239	220	1.74	1	2
Tb11.v5.0229	75 kDa invariant surface glycoprotein, putative	360.25	745	696	928	237	323	284	2	2	3	1	1	1	0	0	0	0	0	0	0	0	0
Tb11.v5.0230	75 kDa invariant surface glycoprotein, putative	5.26	19669	18881	23516	5118	8319	6828	3739	3590	4471	973	1582	1298	123	148	147	160	272	252	1.77	1	2
Tb11.v5.0231	75 kDa invariant surface glycoprotein, putative	4.46	28307	26933	33646	7217	11530	9569	6347	6039	7544	1618	2585	2146	208	249	248	266	445	416	1.73	1	2
Tb11.v5.0232	hypothetical protein, conserved	2.04	6964	5025	6114	1190	1369	1049	3414	2463	2997	583	671	514	112	102	98	96	116	100	1.19	1	0
Tb11.v5.0233	cyclic nucleotide-binding domain containing protein, putative	2	12121	8995	10705	2008	1997	1763	6061	4498	5353	1004	999	882	199	185	176	165	172	171	1.01	1	0
Tb11.v5.0234	ADP-ribosylation factor-like protein, putative	2.21	1312	1011	1391	236	211	205	594	457	629	107	95	93	19	19	21	18	16	18	0.8	1	0
Tb11.v5.0235	hypothetical protein, conserved	1.95	1041	759	1032	176	162	142	534	389	529	90	83	73	18	16	17	15	14	14	0.85	1	0
Tb11.v5.0236	transcription factor Tfb2, putative	1.98	2360	1762	2122	314	358	284	1192	890	1072	159	181	143	39	37	35	26	31	28	1	1	0
Tb11.v5.0237	hypothetical protein, conserved	1.99	1880	1499	1718	359	312	299	945	753	863	180	157	150	31	31	28	30	27	29	0.92	1	0
Tb11.v5.0238	Kinesin associated protein, putative	2.08	1176	914	1030	249	209	188	565	439	495	120	100	90	19	18	16	20	17	17	0.92	1	0
Tb11.v5.0239	TPR-repeat-containing chaperone protein DNAJ, putative	2.1	4808	3718	4370	867	786	748	2290	1770	2081	413	374	356	75	73	68	68	64	69	0.93	1	0
Tb11.v5.0240	hypothetical protein, conserved	2.05	4044	3070	3397	581	597	536	1973	1498	1657	283	291	261	65	62	54	47	50	51	0.98	1	0
Tb11.v5.0241	dynein heavy chain, putative	2.03	7261	5325	7127	1079	1127	967	3577	2623	3511	532	555	476	117	108	115	87	96	92	0.95	1	0
Tb11.v5.0242	dynein heavy chain, putative	2.04	35373	26987	35002	5606	5991	5263	17340	13229	17158	2748	2937	2580	569	545	563	452	506	500	1	1	0
Tb11.v5.0243	40S ribosomal protein S18, putative	3.7	12372	10225	13979	3069	2456	2306	3344	2764	3778	829	664	623	110	114	124	136	114	121	0.87	1	0
Tb11.v5.0244	RNA-editing complex protein, putative	1.96	2917	2272	2723	528	493	438	1488	1159	1389	269	252	223	49	48	46	44	43	43	0.95	1	0
Tb11.v5.0245	protein kinase, putative	1.95	3386	2497	2662	595	534	416	1736	1281	1365	305	274	213	57	53	45	50	47	41	0.98	1	0
Tb11.v5.0246	eukaryotic translation initiation factor 6, putative	1.92	1720	1365	1776	348	285	253	896	711	925	181	148	132	29	29	30	30	25	26	0.82	1	0
Tb11.v5.0247	HIRA-interacting protein 5, putative	1.93	888	659	859	147	149	150	460	341	445	76	77	78	15	14	15	12	13	15	0.93	1	0
Tb11.v5.0248	pre-mRNA splicing factor ATP-dependent RNA helicase, putative	1.99	4886	3604	4558	878	745	735	2455	1811	2290	441	374	369	81	75	75	73	64	72	0.86	1	0
Tb11.v5.0249	protein kinase, putative	2.03	1469	1109	1398	263	256	226	724	546	689	130	126	111	24	23	23	21	22	22	0.98	1	0
Tb11.v5.0250	C2 domain containing protein, putative	2.08	1139	987	1182	234	189	192	548	475	568	113	91	92	18	20	19	19	16	18	0.82	1	0
Tb11.v5.0251	phosphatase, putative	1.99	988	788	960	201	183	165	496	396	482	101	92	83	16	16	16	17	16	16	0.94	1	0
Tb11.v5.0252	RNA binding protein, putative	2.01	1092	883	1205	200	168	152	543	439	600	100	84	76	18	18	20	16	14	15	0.76	1	0
Tb11.v5.0253	major facilitator superfamily, putative	1.95	4258	3136	3752	615	754	656	2184	1608	1924	315	387	336	72	66	63	52	67	65	1.16	1	0
Tb11.v5.0254	pantothenate kinase subunit, putative	2	22678	16912	17787	3826	3812	3315	11339	8456	8894	1913	1906	1658	372	349	292	314	328	321	1.08	1	0
Tb11.v5.0255	DNA-directed RNA polymerase II, subunit 9, putative	1.94	861	702	868	163	142	125	444	362	447	84	73	64	15	15	15	14	13	12	0.87	1	0
Tb11.v5.0256	proteasome beta 3 subunit, putative	1.98	2056	1714	2173	390	379	378	1038	866	1097	197	191	191	34	36	36	32	33	37	0.96	1	0
Tb11.v5.0257	hypothetical protein, conserved	2	1094	827	1041	198	169	162	547	414	521	99	85	81	18	17	17	16	15	16	0.88	1	0
Tb11.v5.0258	Sperm tail/Sperm tail C-terminal domain containing protein, putative	2.04	4305	3737	4549	821	887	781	2110	1832	2230	402	435	383	69	76	73	66	75	74	1.07	1	0
Tb11.v5.0259	DHHC palmitoyltransferase, putative	1.81	886	693	810	144	143	134	490	383	448	80	79	74	16	16	15	13	14	14	0.97	1	0
Tb11.v5.0260	neurobeachin/beige protein, putative	2.05	4048	3105	3869	693	726	615	1975	1515	1887	338	354	300	65	62	62	56	61	58	1.03	1	0
Tb11.v5.0261	adenosine 5'-monophosphoramidase, putative	2.01	3222	2484	2899	520	477	418	1603	1236	1442	259	237	208	53	51	47	43	41	40	0.9	1	0
Tb11.v5.0262	hypothetical protein, conserved	1.98	8098	6215	7407	1568	1415	1283	4090	3139	3741	792	715	648	134	129	123	130	123	126	0.97	1	0
Tb11.v5.0263	PX domain containing protein, putative	2.14	9059	7101	8054	1620	1917	1622	4233	3318	3764	757	896	758	139	137	124	124	154	147	1.24	1	0
Tb11.v5.0264	Domain of unknown function (DUF4201), putative	1.97	2605	2333	2516	501	423	404	1322	1184	1277	254	215	205	43	49	42	42	37	40	0.87	1	0
Tb11.v5.0265	Thioredoxin-like, putative	2.01	9682	7975	12138	2079	2025	1797	4817	3968	6039	1034	1007	894	158	164	198	170	173	173	0.94	1	0
Tb11.v5.0266	hypothetical protein, conserved	2.01	1591	1225	1631	334	287	277	792	609	811	166	143	138	26	25	27	27	25	27	0.91	1	0
Tb11.v5.0267	hypothetical protein, conserved	2.19	1320	973	1102	233	239	185	603	444	503	106	109	84	20	18	17	17	19	16	1.09	1	0
Tb11.v5.0268	60S ribosomal protein-like, putative	2.06	999	786	1002	145	151	131	485	382	486	70	73	64	16	16	16	12	13	12	0.9	1	0
Tb11.v5.0269	histone acetyltransferase, putative	2.08	2368	1767	2246	499	407	404	1138	850	1080	240	196	194	37	35	35	39	34	38	0.91	1	0
Tb11.v5.0270	nucleoside hydrolase, putative	1.88	5578	4767	6016	1167	940	803	2967	2536	3200	621	500	427	97	105	105	102	86	83	0.83	1	0
Tb11.v5.0271	trypanin, putative	2.03	3458	2854	3345	622	549	537	1703	1406	1648	306	270	265	56	58	54	50	47	51	0.9	1	0
Tb11.v5.0272	hypothetical protein, conserved	1.95	1908	1541	1770	358	313	297	978	790	908	184	161	152	32	33	30	30	28	29	0.92	1	0
Tb11.v5.0273	hypothetical protein, conserved	2.01	9949	8090	10449	1948	1891	1800	4950	4025	5199	969	941	896	162	166	171	159	162	174	0.98	1	0
Tb11.v5.0274	CBF/Mak21 family, putative	1.99	3380	2507	3153	569	496	436	1698	1260	1584	286	249	219	56	52	52	47	43	42	0.86	1	0
Tb11.v5.0275	major vault protein, putative	1.99	6861	5459	6725	1287	1146	1047	3448	2743	3379	647	576	526	113	113	111	106	99	102	0.91	1	0
Tb11.v5.0276	Ribosomal protein S5, C-terminal domain containing protein, putative	2.02	1584	1240	1494	230	233	194	784	614	740	114	115	96	26	25	24	19	20	19	0.91	1	0
Tb11.v5.0277	ATP-dependent DEAD/H RNA helicase, putative	1.95	3204	2649	3213	690	585	589	1643	1358	1648	354	300	302	54	56	54	58	52	59	0.92	1	0
Tb11.v5.0278	N-terminal glutamine amidase, putative	2.17	645	586	648	143	127	100	297	270	299	66	59	46	10	11	10	11	10	9	0.91	1	0
Tb11.v5.0279	ATP-dependent DEAD/H RNA helicase, putative	2.04	2927	2234	2633	451	442	351	1435	1095	1291	221	217	172	47	45	42	36	37	33	0.94	1	0
Tb11.v5.0280	hypothetical protein, conserved	1.99	2462	1908	2381	402	370	362	1237	959	1196	202	186	182	41	40	39	33	32	35	0.88	1	0
Tb11.v5.0281	receptor-type adenylate cyclase GRESAG 4, putative	5.02	8161	6111	7965	1516	1426	1203	1626	1217	1587	302	284	240	53	50	52	50	49	47	0.95	1	0
Tb11.v5.0282	expression site-associated gene (ESAG) protein, putative	1.98	1539	1093	1265	247	264	200	777	552	639	125	133	101	26	23	21	21	23	20	1.07	1	0
Tb11.v5.0283	variant surface glycoprotein (VSG) pseudogene, putative		9	10	22	1	0	3							0	0	0	0	0	0		0	0
Tb11.v5.0284	variant surface protein, atypical (VSG), putative		2	0	0	0	1	0							0	0	0	0	0	0		0	0
Tb11.v5.0285	variant surface protein, putative		1	0	0	0	0	0							0	0	0	0	0	0		0	0
Tb11.v5.0286	variant surface protein, atypical (VSG), putative		0	0	0	0	0	0							0	0	0	0	0	0		0	0
Tb11.v5.0287	variant surface protein, putative		0	2	2	0	0	0							0	0	0	0	0	0		0	0
Tb11.v5.0288	ribonucleoside-diphosphate reductase small chain, putative	3.04	7609	6401	7546	1380	1197	1078	2503	2106	2482	454	394	355	82	87	81	75	68	69	0.87	1	0
Tb11.v5.0289	ubiquitin ligase, putative	2.02	9328	7483	9425	1685	1690	1564	4618	3704	4666	834	837	774	152	153	153	137	144	150	0.99	1	0
Tb11.v5.0290	hypothetical protein, conserved	2.07	980	860	1041	206	162	167	473	415	503	100	78	81	16	17	17	16	13	16	0.76	1	0
Tb11.v5.0291	CPSF30	2.01	1705	1388	1623	314	286	291	848	691	807	156	142	145	28	28	26	26	24	28	0.91	1	0
Tb11.v5.0292	hypothetical protein, conserved	2	1462	1228	1464	268	254	238	731	614	732	134	127	119	24	25	24	22	22	23	0.94	1	0
Tb11.v5.0294	retrotransposon hot spot (RHS) protein, putative	12	12537	9866	12299	1757	1866	1559	1045	822	1025	146	156	130	34	34	34	24	27	25	0.92	1	0
Tb11.v5.0295	retrotransposon hot spot (RHS) protein, putative	7.25	46801	38657	44657	7887	7055	6291	6455	5332	6160	1088	973	868	212	220	202	179	168	168	0.88	1	0
Tb11.v5.0296	variant surface protein, atypical (VSG), putative		0	0	0	0	0	0							0	0	0	0	0	0		0	0
Tb11.v5.0297	variant surface protein, putative		1	1	1	2	0	0							0	0	0	0	0	0		0	0
Tb11.v5.0298	variant surface protein, putative	44.67	343	242	349	36	39	37	8	5	8	1	1	1	0	0	0	0	0	0	0	0	0
Tb11.v5.0299	variant surface protein, putative		0	0	0	0	0	0							0	0	0	0	0	0		0	0
Tb11.v5.0300	variant surface protein, atypical (VSG), putative		0	0	1	0	0	0							0	0	0	0	0	0		0	0
Tb11.v5.0301	glycerol uptake protein, putative	3.58	1493	1226	1604	232	250	196	417	342	448	65	70	55	14	14	15	11	12	11	0.89	1	0
Tb11.v5.0302	hypothetical protein, conserved	2.97	1141	889	950	195	159	148	384	299	320	66	54	50	13	12	11	11	9	10	0.78	1	0
Tb11.v5.0303	pdz domain containing protein, putative	1.93	1475	1165	1419	266	254	225	764	604	735	138	132	117	25	25	24	23	23	23	0.96	1	0
Tb11.v5.0304	cation transporter, putative	2.01	1697	1367	1748	322	336	257	844	680	870	160	167	128	28	28	29	26	29	25	1.04	1	0
Tb11.v5.0305	TFIID-like protein, putative	2.06	808	761	917	190	187	143	392	369	445	92	91	69	13	15	15	15	16	13	1.03	1	0
Tb11.v5.0306	Triglyceride lipase, putative,class 3 lipase, putative	2	1879	1460	1755	358	342	270	940	730	878	179	171	135	31	30	29	29	29	26	0.98	1	0
Tb11.v5.0307	THT1 - hexose transporter, putative	17	27077	21044	26868	5024	4814	6524	1593	1238	1580	296	283	384	52	51	52	49	49	74	0.96	1	0
Tb11.v5.0308	THT1 - hexose transporter, putative	14.09	27135	21089	26931	5037	4831	6535	1926	1497	1911	357	343	464	63	62	63	59	59	90	0.96	1	0
Tb11.v5.0309	THT1 - hexose transporter, putative	12.84	27128	21081	26924	5039	4828	6530	2113	1642	2097	392	376	509	69	68	69	64	65	99	0.97	1	0
Tb11.v5.0310	THT1 - hexose transporter, putative	16.74	27132	21083	26933	5037	4828	6535	1621	1259	1609	301	288	390	53	52	53	49	50	76	0.97	1	0
Tb11.v5.0311	variant surface protein, putative		1	0	1	0	0	0							0	0	0	0	0	0		0	0
Tb11.v5.0312	variant surface protein, putative		1	0	1	0	0	0							0	0	0	0	0	0		0	0
Tb11.v5.0313	variant surface protein, atypical (VSG), putative	13.45	32	41	62	13	13	11	2	3	5	1	1	1	0	0	0	0	0	0	0	0	0
Tb11.v5.0314	variant surface protein, putative		0	0	0	0	0	0							0	0	0	0	0	0		0	0
Tb11.v5.0315	hypothetical protein, conserved	1.9	1307	969	1164	250	233	205	688	510	613	132	123	108	23	21	20	22	21	21	0.98	1	0
Tb11.v5.0316	variant surface protein, atypical (VSG), putative		0	0	1	0	0	0							0	0	0	0	0	0		0	0
Tb11.v5.0317	hypothetical protein, conserved	24.19	430	344	511	82	74	94	18	14	21	3	3	4	1	1	1	0	1	1	1	0	0
Tb11.v5.0318	hypothetical protein, conserved		0	0	0	0	0	0							0	0	0	0	0	0		0	0
Tb11.v5.0319	hypothetical protein, conserved		0	0	0	0	0	0							0	0	0	0	0	0		0	0
Tb11.v5.0320	hypothetical protein, conserved		0	0	0	0	0	0							0	0	0	0	0	0		0	0
Tb11.v5.0321	hypothetical protein, conserved		0	0	1	0	0	0							0	0	0	0	0	0		0	0
Tb11.v5.0322	hypothetical protein, conserved		0	0	0	0	0	0							0	0	0	0	0	0		0	0
Tb11.v5.0323	hypothetical protein, conserved		0	0	0	0	0	0							0	0	0	0	0	0		0	0
Tb11.v5.0324	variant surface protein, atypical (VSG), putative		0	0	1	0	0	0							0	0	0	0	0	0		0	0
Tb11.v5.0325	retrotransposon hot spot (RHS) protein, putative	4.1	19583	15617	18155	2880	2815	2369	4776	3809	4428	702	687	578	157	157	145	115	118	112	0.9	1	0
Tb11.v5.0326	retrotransposon hot spot (RHS) protein, putative	2.11	16568	12622	15331	2096	2138	1898	7852	5982	7266	993	1013	900	258	247	239	163	174	174	0.86	1	0
Tb11.v5.0327	variant surface protein, putative	1	1	1	5	0	0	1	1	1	5	0	0	1	0	0	0	0	0	0		0	0
Tb11.v5.0328	UDP-Gal or UDP-GlcNAc-dependent glycosyltransferase, putative		1	0	4	0	0	0							0	0	0	0	0	0		0	0
Tb11.v5.0329	variant surface protein, putative		0	0	4	0	1	0							0	0	0	0	0	0		0	0
Tb11.v5.0330	THT1 - hexose transporter, putative	9.11	27144	21098	26951	5039	4832	6538	2980	2316	2958	553	530	718	98	95	97	91	91	139	0.96	1	0
Tb11.v5.0331	THT1 - hexose transporter, putative	15.82	17725	13722	17561	3419	3161	4071	1120	867	1110	216	200	257	37	36	36	36	34	50	0.93	1	0
Tb11.v5.0332	THT2A - glucose transporter, putative	16.74	17765	13759	17592	3424	3167	4075	1061	822	1051	205	189	243	35	34	35	34	33	47	0.94	1	0
Tb11.v5.0333	THT1 - hexose transporter, putative, fragment	11.52	6145	4950	6478	1296	1284	1550	533	430	562	113	111	135	17	18	18	19	19	26	1	1	0
Tb11.v5.0334	Variant Surface Glycoprotein, putative		0	2	0	0	0	0							0	0	0	0	0	0		0	0
Tb11.v5.0335	Variant Surface Glycoprotein, putative		0	0	0	0	0	0							0	0	0	0	0	0		0	0
Tb11.v5.0336	Variant Surface Glycoprotein, putative	3.7	209	194	262	29	34	33	56	52	71	8	9	9	2	2	2	1	2	2	1	0	0
Tb11.v5.0337	hypothetical protein, conserved	2.03	11059	9034	11220	1967	2013	1642	5448	4450	5527	969	992	809	179	183	181	159	171	157	1	1	0
Tb11.v5.0338	hypothetical protein, conserved	2.04	1377	1071	1172	287	280	236	675	525	575	141	137	116	22	22	19	23	24	22	1.12	1	0
Tb11.v5.0339	hypothetical protein, conserved	1.96	3396	2822	3661	595	747	641	1733	1440	1868	304	381	327	57	59	61	50	66	63	1.18	1	0
Tb11.v5.0340	ribonuclease HII, putative	2.06	1762	1409	1701	286	274	244	855	684	826	139	133	118	28	28	27	23	23	23	0.9	1	0
Tb11.v5.0341	Protein of unknown function (DUF3592), putative	2.02	966	846	964	175	170	170	478	419	477	87	84	84	16	17	16	14	14	16	0.9	1	0
Tb11.v5.0342	chaperone protein DNAj, putative	1.95	1938	1553	1693	364	378	326	994	796	868	187	194	167	33	33	28	31	33	32	1.1	1	0
Tb11.v5.0343	BarP protein, putative	7.81	1948	1441	1831	372	313	306	249	185	234	48	40	39	8	8	8	8	7	8	0.82	0	0
Tb11.v5.0344	BarP protein, putative	3.15	2504	1841	2228	429	354	334	795	584	707	136	112	106	26	24	23	22	19	21	0.83	1	0
Tb11.v5.0345	BarP protein, putative	5.19	2160	1587	1921	373	327	304	416	306	370	72	63	59	14	13	12	12	11	11	0.88	1	0
Tb11.v5.0346	BarP protein, putative	5.12	2740	2004	2557	506	417	421	535	391	499	99	81	82	18	16	16	16	14	16	0.85	1	0
Tb11.v5.0348	hypothetical protein, conserved	2.17	5053	4141	4821	832	795	731	2329	1908	2222	383	366	337	76	79	73	63	63	65	0.92	1	0
Tb11.v5.0349	DNA-directed RNA polymerase II subunit 2, putative	12.48	33060	25461	32180	4673	4426	4014	2649	2040	2579	374	355	322	87	84	85	61	61	62	0.83	1	0
Tb11.v5.0350	hypothetical protein, conserved		3	1	4	0	1	1							0	0	0	0	0	0		0	0
Tb11.v5.0351	variant surface protein, atypical (VSG), putative		0	0	0	0	0	0							0	0	0	0	0	0		0	0
Tb11.v5.0353	retrotransposon hot spot (RHS) protein, putative	9.7	1959	1566	2688	518	372	323	202	161	277	53	38	33	7	7	9	9	7	6	0.74	0	0
Tb11.v5.0354	TPR repeat, putative	13.54	1649	1255	1526	287	252	229	122	93	113	21	19	17	4	4	4	3	3	3	0.75	0	0
Tb11.v5.0355	TPR repeat, putative	4.22	3752	2901	4643	823	905	836	889	687	1100	195	214	198	29	28	36	32	37	38	1.07	1	0
Tb11.v5.0356	cytidine triphosphate synthase, putative	2	5683	4508	5058	976	851	695	2842	2254	2529	488	426	348	93	93	83	80	73	67	0.89	1	0
Tb11.v5.0357	homocysteine S-methyltransferase, putative	2.01	1311	1130	1631	265	324	292	652	562	811	132	161	145	21	23	27	22	28	28	1.12	1	0
Tb11.v5.0358	hypothetical protein, conserved		130	50	5	2	1	0							0	0	0	0	0	0		0	0
Tb11.v5.0359	hypothetical protein, conserved	2.09	3535	2795	3260	679	611	522	1691	1337	1560	325	292	250	56	55	51	53	50	48	0.95	1	0
Tb11.v5.0360	aminopeptidase, putative	1.99	3456	2755	3161	697	758	628	1737	1384	1588	350	381	316	57	57	52	58	66	61	1.19	1	0
Tb11.v5.0361	Variant Surface Glycoprotein, putative		0	1	0	0	0	1							0	0	0	0	0	0		0	0
Tb11.v5.0362	Variant Surface Glycoprotein, putative		0	0	0	1	0	0							0	0	0	0	0	0		0	0
Tb11.v5.0363	Variant Surface Glycoprotein, putative		1	3	2	0	0	0							0	0	0	0	0	0		0	0
Tb11.v5.0364	hypothetical protein, conserved	3.05	17740	14651	18100	3511	3816	3267	5816	4804	5934	1151	1251	1071	191	198	195	189	215	208	1.12	1	0
Tb11.v5.0365	hypothetical protein, conserved	2.97	18134	16556	22033	4062	4024	3468	6106	5574	7419	1368	1355	1168	200	230	244	225	233	226	0.99	1	0
Tb11.v5.0366	hypothetical protein, conserved	6.86	54450	52915	72237	13724	13607	11798	7937	7714	10530	2001	1984	1720	261	318	346	329	342	333	1.01	1	0
Tb11.v5.0367	expression site-associated gene (ESAG) protein, putative	2.91	4442	3504	4082	634	719	590	1526	1204	1403	218	247	203	50	50	46	36	43	39	1.04	1	0
Tb11.v5.0368	hypothetical protein, conserved	56.03	6505	4792	5763	986	891	805	116	86	103	18	16	14	4	4	3	3	3	3	0.86	0	0
Tb11.v5.0369	hypothetical protein, conserved	49.03	7477	5513	6722	1074	1034	903	152	112	137	22	21	18	5	5	4	4	4	3	0.89	0	0
Tb11.v5.0371	hypothetical protein, conserved	2.14	1487	1218	1569	251	269	283	695	569	733	117	126	132	23	23	24	19	22	26	1	1	0
Tb11.v5.0372	hypothetical protein, conserved	1.97	1860	1354	1687	293	316	293	944	687	856	149	160	149	31	28	28	24	28	29	1.06	1	0
Tb11.v5.0373	hypothetical protein, conserved	2.04	797	644	856	131	118	108	391	316	420	64	58	53	13	13	14	11	10	10	0.77	1	0
Tb11.v5.0374	hypothetical protein, conserved	2.52	1676	1309	1543	261	231	202	665	519	612	104	92	80	22	21	20	17	16	16	0.84	1	0
Tb11.v5.0375	hypothetical protein, conserved	2.34	1033	679	863	182	178	171	441	290	369	78	76	73	14	12	12	13	13	14	1	1	0
Tb11.v5.0376	Trypanosomal VSG domain containing protein, putative	43.02	299	181	302	39	46	26	7	4	7	1	1	1	0	0	0	0	0	0	0	0	0
Tb11.v5.0377	hypothetical protein, conserved	13.62	65765	45667	63400	10656	12958	10995	4829	3353	4655	782	951	807	159	138	153	129	164	156	1.16	1	0
Tb11.v5.0378	hypothetical protein, conserved	11.44	96840	66963	94044	15753	19368	16051	8465	5853	8221	1377	1693	1403	278	241	270	226	292	272	1.18	1	0
Tb11.v5.0379	receptor-type adenylate cyclase GRESAG 4, putative	5.5	3951	2907	3825	742	629	559	718	529	695	135	114	102	24	22	23	22	20	20	0.87	1	0
Tb11.v5.0380	variant surface glycoprotein (VSG, atypical), putative	7.92	3543	2697	3877	668	599	558	447	341	490	84	76	70	15	14	16	14	13	14	0.84	1	0
Tb11.v5.0381	hypothetical protein, conserved	42.86	785314	662010	1187095	226527	148054	123639	18323	15446	27697	5285	3454	2885	601	637	909	869	595	559	0.67	1	0
Tb11.v5.0382	hypothetical protein, conserved	2.53	704	543	654	156	118	115	278	215	258	62	47	45	9	9	8	10	8	9	0.84	0	0
Tb11.v5.0383	zeta tubulin, putative	2.14	1187	1005	1212	205	216	174	555	470	566	96	101	81	18	19	19	16	17	16	0.94	1	0
Tb11.v5.0384	glycerol-3-phosphate dehydrogenase (FAD-dependent),putative	1.89	2447	1863	2658	487	466	477	1295	986	1406	258	247	252	43	41	46	42	43	49	0.97	1	0
Tb11.v5.0385	expression site-associated gene 3 (ESAG3) protein, putative	158	742	630	554	84	38	72	5	4	4	1	0	0	0	0	0	0	0	0	0	0	0
Tb11.v5.0386	variant surface glycoprotein (VSG, atypical), putative		0	0	0	0	0	0							0	0	0	0	0	0		0	0
Tb11.v5.0387	cell-division control protein 2 homolog 6, putative	2.08	1619	1180	1490	277	269	231	778	567	716	133	129	111	26	23	24	22	22	22	0.94	1	0
Tb11.v5.0388	Ring finger domain/PHD-finger, putative	2.06	1567	1246	1597	264	281	224	761	605	775	128	136	109	25	25	25	21	23	21	0.98	1	0
Tb11.v5.0389	variant surface glycoprotein (VSG, atypical), putative		0	0	0	0	0	0							0	0	0	0	0	0		0	0
Tb11.v5.0390	serine/threonine protein phosphatase 2A regulatory subunit, putative	1.96	1913	1400	1822	314	310	305	976	714	930	160	158	156	32	29	31	26	27	30	0.93	1	0
Tb11.v5.0391	rRNA biogenesis protein	1.97	3175	2565	3247	624	499	399	1612	1302	1648	317	253	203	53	54	54	52	44	39	0.82	1	0
Tb11.v5.0392	kinesin heavy chain, putative	2.06	458	353	448	100	84	79	222	171	217	49	41	38	7	7	7	8	7	7	0.88	0	0
Tb11.v5.0394	hypothetical protein, conserved	10.32	177478	139165	180099	35008	46175	38361	17197	13485	17451	3392	4474	3717	565	556	573	558	771	720	1.36	1	0
Tb11.v5.0395	hypothetical protein, conserved		0	0	0	0	0	0							0	0	0	0	0	0		0	0
Tb11.v5.0396	potassium voltage-gated channel, putative	1.82	1671	1355	1535	310	330	285	918	745	843	170	181	157	30	31	28	28	31	30	1.09	1	0
Tb11.v5.0397	ATP-dependent zinc metallopeptidase, putative	2.02	2839	2106	2504	437	483	402	1405	1043	1240	216	239	199	46	43	41	36	41	39	1.05	1	0
Tb11.v5.0399	same as Tb927.10.9650 Nucleoporin NUP152	1.95	9408	7431	9529	1906	1811	1589	4825	3811	4887	977	929	815	158	157	160	161	160	158	0.99	1	0
Tb11.v5.0400	Variant Surface Glycoprotein, putative		0	0	0	0	0	0							0	0	0	0	0	0		0	0
Tb11.v5.0401	Variant Surface Glycoprotein, putative		0	0	0	0	0	0							0	0	0	0	0	0		0	0
Tb11.v5.0402	BarP protein, putative	3.54	2407	1874	2442	418	420	419	680	529	690	118	119	118	22	22	23	19	20	23	0.93	1	0
Tb11.v5.0403	BarP protein, putative	12.58	2327	1813	2415	408	422	398	185	144	192	32	34	32	6	6	6	5	6	6	1	0	0
Tb11.v5.0404	hypothetical protein, conserved	2.39	26120	21890	27064	5632	5051	4577	10929	9159	11324	2356	2113	1915	359	378	372	387	364	371	0.96	1	0
Tb11.v5.0405	50S ribosome-binding GTPase, putative	3.06	3030	2348	3013	585	586	462	990	767	985	191	192	151	32	32	32	31	33	29	1.03	1	0
Tb11.v5.0406	glycerol uptake protein, putative	2.52	5180	4172	5006	868	913	700	2056	1656	1987	344	362	278	67	68	65	57	62	54	1.01	1	0
Tb11.v5.0407	hypothetical protein, conserved	6.35	1638	1336	1708	320	289	262	258	210	269	50	46	41	8	9	9	8	8	8	0.89	0	0
Tb11.v5.0409	guanine deaminase, putative	1.93	6241	4890	5365	1062	926	739	3234	2534	2780	550	480	383	106	104	91	90	83	74	0.91	1	0
Tb11.v5.0410	antigenic protein, conserved	14.05	450490	330627	524420	59326	85320	72529	32063	23532	37325	4222	6073	5162	1052	970	1225	694	1046	1000	1.09	1	0
Tb11.v5.0411	peptidylprolyl isomerase-like protein, putative	2.27	9257	8016	27859	5020	6026	5039	4078	3531	12273	2211	2655	2220	134	146	403	363	457	430	1.19	1	0
Tb11.v5.0412	hypothetical protein, conserved	2.27	3192	2618	2921	634	608	531	1406	1153	1287	279	268	234	46	48	42	46	46	45	1.03	1	0
Tb11.v5.0413	expression site-associated gene 9 (ESAG9) protein	2.37	467	451	509	114	107	92	197	190	215	48	45	39	6	8	7	8	8	8	1	0	0
Tb11.v5.0414	ATP-dependent DEAD/H RNA helicase, putative	2	12519	9896	12330	2128	1890	1705	6260	4948	6165	1064	945	853	205	204	202	175	163	165	0.86	1	0
Tb11.v5.0415	rRNA dimethyltransferase, putative	1.8	1140	907	993	203	181	153	633	504	552	113	101	85	21	21	18	19	17	16	0.89	1	0
Tb11.v5.0416	Variant Surface Glycoprotein, putative		0	0	0	0	1	0							0	0	0	0	0	0		0	0
Tb11.v5.0417	variant surface glycoprotein (atypical), putative		0	0	0	0	0	0							0	0	0	0	0	0		0	0
Tb11.v5.0418	AAA domain (dynein-related subfamily), putative	2.07	4926	3532	4854	610	622	581	2380	1706	2345	295	300	281	78	70	77	48	52	54	0.83	1	0
Tb11.v5.0419	AAA domain (dynein-related subfamily), putative	2.16	4125	2881	3948	582	582	499	1910	1334	1828	269	269	231	63	55	60	44	46	45	0.88	1	0
Tb11.v5.0420	hypothetical protein, conserved	2.03	6543	5292	6037	1266	1020	1030	3223	2607	2974	624	502	507	106	107	98	103	86	98	0.85	1	0
Tb11.v5.0421	75 kDa invariant surface glycoprotein, putative	10.64	13110	14054	17821	4040	6415	5254	1232	1321	1675	380	603	494	40	54	55	62	104	96	1.76	1	2
Tb11.v5.0422	SET domain containing protein, putative	2.01	1826	1481	1700	304	310	240	908	737	846	151	154	119	30	30	28	25	27	23	1	1	0
Tb11.v5.0423	Plexin repeat, putative	2.14	946	885	1227	232	267	244	442	414	573	108	125	114	15	17	19	18	22	22	1.16	1	0
Tb11.v5.0424	receptor-type adenylate cyclase GRESAG 4, putative	12.71	7928	6202	8364	1356	1510	1457	624	488	658	107	119	115	20	20	22	18	20	22	0.98	1	0
Tb11.v5.0425	receptor-type adenylate cyclase GRESAG 4, putative	16.83	10538	7975	10891	1929	1952	1703	626	474	647	115	116	101	21	20	21	19	20	20	0.98	1	0
Tb11.v5.0426	hypothetical protein, conserved	2.06	1514	1196	1427	251	241	193	735	581	693	122	117	94	24	24	23	20	20	18	0.91	1	0
Tb11.v5.0427	peroxisome assembly protein, putative	2.05	2406	1906	2187	429	445	375	1174	930	1067	209	217	183	39	38	35	34	37	35	1.06	1	0
Tb11.v5.0428	hypothetical protein, conserved	2.01	2895	2190	2582	479	499	439	1440	1090	1285	238	248	218	47	45	42	39	43	42	1.05	1	0
Tb11.v5.0429	receptor-type adenylate cyclase GRESAG 4, putative	4.1	19932	16245	22918	4124	5028	4447	4861	3962	5590	1006	1226	1085	160	163	183	165	211	210	1.21	1	0
Tb11.v5.0430	ankyrin, putative	2.38	1027	815	1021	196	212	140	432	342	429	82	89	59	14	14	14	13	15	11	1.07	1	0
Tb11.v5.0431	receptor-type adenylate cyclase GRESAG 4, putative	20.48	10023	8056	10718	1978	2028	1763	489	393	523	97	99	86	16	16	17	16	17	17	1	1	0
Tb11.v5.0432	calpain-like cysteine peptidase, putative	2.13	12442	8773	11439	1941	2377	1935	5841	4119	5370	911	1116	908	192	170	176	150	192	176	1.17	1	0
Tb11.v5.0433	hypothetical protein, conserved	3.23	1630	1418	1645	289	302	264	505	439	509	89	93	82	17	18	17	15	16	16	0.97	1	0
Tb11.v5.0434	kinesin, putative	2.12	6386	4879	5922	1035	1023	930	3012	2301	2793	488	483	439	99	95	92	80	83	85	0.96	1	0
Tb11.v5.0435	adenylosuccinate synthetase, putative	2.09	14423	12184	14556	2589	2406	2052	6901	5830	6965	1239	1151	982	227	240	229	204	198	190	0.91	1	0
Tb11.v5.0436	Leucine Rich Repeat, putative	2.08	2495	1789	2050	355	386	335	1200	860	986	171	186	161	39	35	32	28	32	31	1.05	1	0
Tb11.v5.0437	Mannosyltransferase (PIG-V)), putative	2.26	1361	1053	1509	246	296	215	602	466	668	109	131	95	20	19	22	18	23	18	1.12	1	0
Tb11.v5.0438	hypothetical protein, conserved	2.22	1133	846	935	222	163	185	510	381	421	100	73	83	17	16	14	16	13	16	0.84	1	0
Tb11.v5.0439	hypothetical protein, conserved	26.62	1990	1585	2333	317	330	252	75	60	88	12	12	9	2	2	3	2	2	2	0.67	0	0
Tb11.v5.0440	hypothetical protein, conserved	2.76	4174	3037	3421	691	689	521	1512	1100	1239	250	250	189	50	45	41	41	43	37	1.04	1	0
Tb11.v5.0442	retrotransposon hot spot protein, RHS3, putative	9.02	26987	21354	26041	3771	3903	3391	2992	2367	2887	418	433	376	98	98	95	69	75	73	0.91	1	0
Tb11.v5.0444	hypothetical protein, conserved	2.04	6430	4934	6353	1175	1281	1049	3152	2419	3114	576	628	514	103	100	102	95	108	100	1.09	1	0
Tb11.v5.0445	hypothetical protein, conserved	33.34	409	361	429	78	69	71	12	11	13	2	2	2	0	0	0	0	0	0	0	0	0
Tb11.v5.0446	hypothetical protein, conserved	2.07	1623	1254	1467	340	305	275	784	606	709	164	147	133	26	25	23	27	25	26	0.98	1	0
Tb11.v5.0447	Variant Surface Glycoprotein, putative		0	0	0	1	0	0							0	0	0	0	0	0		0	0
Tb11.v5.0448	leucine-rich repeat protein (LRRP), putative	20.78	54860	39808	50870	7952	7495	6613	2640	1916	2448	383	361	318	87	79	80	63	62	62	0.86	1	0
Tb11.v5.0449	Variant Surface Glycoprotein, putative		0	0	0	0	0	0							0	0	0	0	0	0		0	0
Tb11.v5.0450	hypothetical protein, conserved	2.05	5212	3805	5166	960	988	895	2542	1856	2520	468	482	437	83	76	83	77	83	85	1.03	1	0
Tb11.v5.0451	hypothetical protein, conserved	2.1	3857	2785	3810	623	728	571	1837	1326	1814	297	347	272	60	55	60	49	60	53	1.09	1	0
Tb11.v5.0452	GTPase activating protein, putative	1.87	1324	959	1186	216	266	222	708	513	634	116	142	119	23	21	21	19	24	23	1.17	1	0
Tb11.v5.0453	hypothetical protein, conserved	2.01	1823	1485	1800	315	290	255	907	739	896	157	144	127	30	30	29	26	25	25	0.89	1	0
Tb11.v5.0454	GTPase activating protein, putative	1.96	1440	1118	1619	223	244	232	735	570	826	114	124	118	24	23	27	19	21	23	0.89	1	0
Tb11.v5.0456	receptor-type adenylate cyclase GRESAG 4, putative	30.66	19358	15073	21097	3605	3924	3488	631	492	688	118	128	114	21	20	23	19	22	22	1.02	1	0
Tb11.v5.0458	hypothetical protein, conserved	2.52	1569	1285	1615	309	300	248	623	510	641	123	119	98	20	21	21	20	20	19	0.95	1	0
Tb11.v5.0459	Variant Surface Glycoprotein, putative		0	0	0	0	0	0							0	0	0	0	0	0		0	0
Tb11.v5.0460	Variant Surface Glycoprotein, putative		0	0	0	1	0	1							0	0	0	0	0	0		0	0
Tb11.v5.0461	Variant Surface Glycoprotein, putative		0	0	0	0	0	0							0	0	0	0	0	0		0	0
Tb11.v5.0462	Variant Surface Glycoprotein, putative	1.38	115	67	201	49	29	34	83	49	146	36	21	25	3	2	5	6	4	5	0.67	0	0
Tb11.v5.0463	expression site-associated gene (ESAG) protein, putative	5.36	8189	6673	7184	1561	1728	1624	1528	1245	1340	291	322	303	50	51	44	48	55	59	1.18	1	0
Tb11.v5.0464	vesicular-fusion protein nsf, putative	2.01	5164	3949	5016	747	791	670	2569	1965	2496	372	394	333	84	81	82	61	68	65	0.94	1	0
Tb11.v5.0465	tRNA pseudouridine synthase A-like protein, putative	2.03	1890	1442	1572	320	318	251	931	710	774	158	157	124	31	29	25	26	27	24	1.04	1	0
Tb11.v5.0467	hypothetical protein, conserved	2.01	5231	4059	5088	1044	962	896	2602	2019	2531	519	479	446	85	83	83	85	82	86	0.97	1	0
Tb11.v5.0468	alpha tubulin, putative	5.15	214681	189483	240863	62102	42926	39941	41686	36793	46770	12059	8335	7756	1368	1516	1535	1982	1436	1503	0.82	1	0
Tb11.v5.0469	beta tubulin, putative	5.13	342587	304024	387724	95153	66239	60484	66781	59264	75580	18548	12912	11790	2192	2443	2481	3049	2224	2285	0.8	1	0
Tb11.v5.0470	receptor-type adenylate cyclase GRESAG 4, putative	2.06	2731	2012	2503	467	447	411	1326	977	1215	227	217	200	44	40	40	37	37	39	0.95	1	0
Tb11.v5.0471	kelch motif containing protein, putative	2.33	4516	3393	4150	878	737	770	1938	1456	1781	377	316	330	64	60	58	62	54	64	0.89	1	0
Tb11.v5.0472	hypothetical protein, conserved	2.24	2188	1785	2121	446	415	396	977	797	947	199	185	177	32	33	31	33	32	34	0.98	1	0
Tb11.v5.0474	protein kinase, putative	2.06	1567	1201	1398	228	218	224	761	583	679	111	106	109	25	24	22	18	18	21	0.88	1	0
Tb11.v5.0476	Variant Surface Glycoprotein, putative	6.98	1293	1316	2889	423	1041	708	185	189	414	61	149	101	6	8	14	10	26	20	2.08	1	1
Tb11.v5.0477	TPR repeat, putative	1.89	3508	2734	3046	552	555	484	1856	1447	1612	292	294	256	61	60	53	48	51	50	1	1	0
Tb11.v5.0479	hypothetical protein, conserved	1.91	1311	999	1206	256	224	198	686	523	631	134	117	104	23	22	21	22	20	20	0.91	1	0
Tb11.v5.0480	DNA-directed RNA polymerase, alpha subunit, putative	1.66	1992	1524	1786	385	324	268	1200	918	1076	232	195	161	39	38	35	38	34	31	0.92	1	0
Tb11.v5.0481	U3 snoRNA-associated protein UTP11, putative	1.92	2512	1811	2221	398	280	267	1308	943	1157	207	146	139	43	39	38	34	25	27	0.68	1	0
Tb11.v5.0482	hypothetical protein, conserved	1.88	1866	1464	1888	328	279	268	993	779	1004	174	148	143	33	32	33	29	25	28	0.79	1	0
Tb11.v5.0484	receptor-type adenylate cyclase GRESAG 4, putative	7.01	4957	3849	5247	1031	1055	915	707	549	749	147	150	131	23	23	25	24	26	25	1.04	1	0
Tb11.v5.0485	hypothetical protein, conserved	2.15	4016	3077	3786	695	680	616	1868	1431	1761	323	316	287	61	59	58	53	54	56	0.96	1	0
Tb11.v5.0486	katanin, putative	2	1435	1095	1305	189	226	188	718	548	653	95	113	94	24	23	21	16	19	18	1	1	0
Tb11.v5.0487	Programmed cell death protein 2, C-terminal putative domain containing protein, putative	1.86	1834	1501	1716	317	313	289	986	807	923	170	168	155	32	33	30	28	29	30	0.98	1	0
Tb11.v5.0488	hypothetical protein, conserved	2.48	1036	816	893	193	177	162	418	329	360	78	71	65	14	14	12	13	12	13	0.92	1	0
Tb11.v5.0489	retrotransposon hot spot protein (RHS, pseudogene)	5.98	74119	60359	72081	11888	11215	10045	12394	10093	12054	1988	1875	1680	407	416	396	327	323	326	0.89	1	0
Tb11.v5.0490	hypothetical protein, conserved	1.8	979	862	1018	190	183	151	544	479	566	106	102	84	18	20	19	17	18	16	0.97	1	0
Tb11.v5.0491	Serine hydrolase (FSH1)/RWD domain/50S ribosome-binding GTPase, putative	3.03	2243	1802	2276	422	388	377	740	595	751	139	128	124	24	25	25	23	22	24	0.9	1	0
Tb11.v5.0493	kinesin K39, putative	13.11	47319	34886	53720	8730	8524	7457	3609	2661	4098	666	650	569	118	110	135	109	112	110	0.91	1	0
Tb11.v5.0494	RNA helicase, putative		0	0	0	0	0	0							0	0	0	0	0	0		0	0
Tb11.v5.0495	retrotransposon hot spot (RHS), putative	16.64	26667	23979	27277	5528	5068	4787	1603	1441	1639	332	305	288	53	59	54	55	53	56	0.96	1	0
Tb11.v5.0496	sterol 24-c-methyltransferase, putative	3.39	2859	2071	2312	496	411	361	843	611	682	146	121	106	28	25	22	24	21	21	0.89	1	0
Tb11.v5.0497	hypothetical protein, conserved	2.28	2570	2066	2585	528	462	371	1127	906	1134	232	203	163	37	37	37	38	35	32	0.92	1	0
Tb11.v5.0498	lysosomal alpha-mannosidase precursor, putative	1.97	6376	4747	5849	1001	1223	1007	3237	2410	2969	508	621	511	106	99	97	84	107	99	1.18	1	0
Tb11.v5.0499	hypothetical protein, conserved	2.07	624	458	601	101	100	80	301	221	290	49	48	39	10	9	10	8	8	8	0.84	0	0
Tb11.v5.0500	2-oxoisovalerate dehydrogenase alpha subunit, putative	1.99	1457	1169	1251	239	229	216	732	587	629	120	115	109	24	24	21	20	20	21	0.95	1	0
Tb11.v5.0501	40S ribosomal protein S3A	3.34	23909	19188	25264	5931	4579	4534	7158	5745	7564	1776	1371	1357	235	237	248	292	236	263	0.87	1	0
Tb11.v5.0502	hypothetical protein, conserved	1.98	3544	2811	3034	680	586	486	1790	1420	1532	343	296	245	59	59	50	56	51	47	0.95	1	0
Tb11.v5.0504	RNA polymerase IIA largest subunit, putative	3.7	15433	12493	15332	3079	3094	2646	4171	3376	4144	832	836	715	137	139	136	137	144	139	1.05	1	0
Tb11.v5.0505	hypothetical protein, conserved	4.4	7144	5363	6879	993	928	851	1624	1219	1563	226	211	193	53	50	51	37	36	37	0.81	1	0
Tb11.v5.0506	hypothetical protein, conserved	2.12	4946	4000	4913	906	875	790	2333	1887	2317	427	413	373	77	78	76	70	71	72	0.97	1	0
Tb11.v5.0507	hypothetical protein, conserved	1.71	2574	1971	2720	431	456	397	1505	1153	1591	252	267	232	49	48	52	41	46	45	0.98	1	0
Tb11.v5.0508	hypothetical protein, conserved	2.33	1111	779	978	217	178	131	477	334	420	93	76	56	16	14	14	15	13	11	0.87	1	0
Tb11.v5.0509	hypothetical protein, conserved	2.1	1502	1175	1402	234	251	219	715	560	668	111	120	104	23	23	22	18	21	20	1.02	1	0
Tb11.v5.0510	Gp63-3 surface protease homolog, putative	34.32	2824	2465	3396	675	813	663	82	72	99	20	24	19	3	3	3	3	4	4	1.14	0	0
Tb11.v5.0511	Gp63-3 surface protease homolog, putative	39.06	2282	1843	2847	519	645	552	58	47	73	13	17	14	2	2	2	2	3	3	1.2	0	0
Tb11.v5.0512	RBP43	1.95	1380	1095	1417	262	260	240	708	562	727	134	133	123	23	23	24	22	23	24	0.98	1	0
Tb11.v5.0513	NLI interacting factor-like phosphatase, putative	2	1789	1326	1756	323	332	298	895	663	878	162	166	149	29	27	29	27	29	29	1.02	1	0
Tb11.v5.0514	cation transporter, putative	4.56	5639	4737	10361	1795	1577	1285	1237	1039	2272	394	346	282	41	43	75	65	60	55	0.85	1	0
Tb11.v5.0515	protein kinase, putative	2.05	4342	3328	3619	726	709	653	2118	1623	1765	354	346	319	70	67	58	58	60	62	1.03	1	0
Tb11.v5.0516	glyceraldehyde 3-phosphate dehydrogenase, cytosolic, putative	1.99	9163	7642	10458	2056	1892	1739	4605	3840	5255	1033	951	874	151	158	173	170	164	169	0.95	1	0
Tb11.v5.0517	hypothetical protein, conserved	2.38	3270	2683	3343	616	618	493	1374	1127	1405	259	260	207	45	46	46	43	45	40	1	1	0
Tb11.v5.0518	variant surface glycoprotein (VSG), putative		0	1	0	0	0	0							0	0	0	0	0	0		0	0
Tb11.v5.0519	hypothetical protein, conserved	1.86	1751	1448	1813	345	297	284	941	778	975	185	160	153	31	32	32	30	28	30	0.89	1	0
Tb11.v5.0520	acetyltransferase, putative	2.01	2942	2359	2926	496	483	429	1464	1174	1456	247	240	213	48	48	48	41	41	41	0.91	1	0
Tb11.v5.0522	hypothetical protein, conserved	1.99	2011	1531	2095	398	392	319	1011	769	1053	200	197	160	33	32	35	33	34	31	0.99	1	0
Tb11.v5.0523	hypothetical protein, conserved	2.04	1550	1146	1409	250	242	209	760	562	691	123	119	102	25	23	23	20	20	20	0.91	1	0
Tb11.v5.0524	hypothetical protein, conserved	1.93	1902	1493	1939	314	355	274	985	774	1005	163	184	142	32	32	33	27	32	28	1.05	1	0
Tb11.v5.0525	hypothetical protein, conserved	2.07	7649	6379	7347	1506	1456	1231	3695	3082	3549	728	703	595	121	127	117	120	121	115	1.02	1	0
Tb11.v5.0526	DNA polymerase kappa, putative	9.92	7867	6219	7748	1211	1267	1022	793	627	781	122	128	103	26	26	26	20	22	20	0.94	1	0
Tb11.v5.0527	WD domain, G-beta repeat, putative	2.11	2299	1818	2078	412	420	367	1090	862	985	195	199	174	36	36	32	32	34	34	1.05	1	0
Tb11.v5.0528	hypothetical protein, conserved	2.05	2041	1472	1819	355	324	288	996	718	887	173	158	140	33	30	29	28	27	27	0.93	1	0
Tb11.v5.0529	ATP-dependent DEAD/H RNA helicase, putative	2.43	2258	1711	2461	442	356	305	929	704	1013	182	147	126	30	29	33	30	25	24	0.78	1	0
Tb11.v5.0530	BSD domain containing protein, putative	2.08	3680	2856	3478	702	689	620	1769	1373	1672	338	331	298	58	57	55	56	57	58	1.02	1	0
Tb11.v5.0531	fructose-bisphosphate aldolase, glycosomal, putative	2.01	88734	73771	74029	18548	16148	15433	44146	36702	36830	9228	8034	7678	1449	1513	1209	1517	1384	1488	1.02	1	0
Tb11.v5.0532	retrotransposon hot spot (RHS) protein, putative	13.04	37601	28692	33761	4823	5108	4402	2884	2200	2589	370	392	338	95	91	85	61	68	66	0.93	1	0
Tb11.v5.0533	retrotransposon hot spot (RHS) protein, putative	16.65	22850	19298	23105	4048	3991	3543	1372	1159	1388	243	240	213	45	48	46	40	41	41	0.94	1	0
Tb11.v5.0534	protein kinase, putative	1.98	3646	2861	3449	623	626	545	1841	1445	1742	315	316	275	60	60	57	52	54	53	0.98	1	0
Tb11.v5.0535	minichromosome maintenance (MCM) complex subunit, putative	1.97	2028	1558	2092	326	395	308	1029	791	1062	165	201	156	34	33	35	27	35	30	1.11	1	0
Tb11.v5.0536	hypothetical protein, conserved	2.19	2431	1917	2604	429	499	442	1110	875	1189	196	228	202	36	36	39	32	39	39	1.08	1	0
Tb11.v5.0537	polyubiquitin, putative	28.22	258549	202730	334121	60267	70632	62065	9162	7184	11840	2136	2503	2199	301	296	389	351	431	426	1.16	1	0
Tb11.v5.0538	PFR protein 69	4.24	61401	53316	68476	14635	11650	10802	14481	12575	16150	3452	2748	2548	475	518	530	568	473	494	0.86	1	0
Tb11.v5.0539	Bardet-Biedl syndrome 4 protein, putative (BBS4)	1.99	1283	1079	1289	257	241	174	645	542	648	129	121	87	21	22	21	21	21	17	0.98	1	0
Tb11.v5.0540	amino acid transporter 8, putative	3.21	10568	8638	12362	2202	1841	1587	3292	2691	3851	686	574	494	108	111	126	113	99	96	0.83	1	0
Tb11.v5.0541	amino acid transporter, putative	3.72	6267	5287	6006	1128	1070	840	1685	1421	1615	303	288	226	55	59	53	50	50	44	0.96	1	0
Tb11.v5.0542	hypothetical protein, conserved	3.89	1753	1390	1597	227	260	243	451	357	411	58	67	62	15	15	13	10	12	12	1	1	0
Tb11.v5.0543	Heat shock protein 83, putative	4.65	96654	82360	245521	47517	45186	37740	20786	17712	52800	10219	9717	8116	682	730	1733	1680	1674	1573	0.98	1	0
Tb11.v5.0544	methionyl-tRNA formyltransferase, putative	2.04	2620	2077	2504	468	431	369	1284	1018	1227	229	211	181	42	42	40	38	36	35	0.91	1	0
Tb11.v5.0546	receptor-type adenylate cyclase GRESAG 4, putative	4.19	12168	9052	11981	2115	2190	1922	2904	2160	2859	505	523	459	95	89	94	83	90	89	1.01	1	0
Tb11.v5.0547	DNA mismatch repair protein, putative	2.19	1654	1335	1684	343	301	280	755	610	769	157	137	128	25	25	25	26	24	25	0.92	1	0
Tb11.v5.0550	hypothetical protein, conserved	2.12	3638	2713	3407	603	555	501	1716	1280	1607	284	262	236	56	53	53	47	45	46	0.89	1	0
Tb11.v5.0551	leucine-rich repeat protein (LRRP), putative	22.61	55319	39820	51706	8198	7780	6770	2447	1761	2287	363	344	299	80	73	75	60	59	58	0.87	1	0
Tb11.v5.0552	75 kDa invariant surface glycoprotein, putative	23.01	12617	13501	17019	3930	6213	5079	548	587	740	171	270	221	18	24	24	28	47	43	1.77	1	2
Tb11.v5.0553	ubiquitin hydrolase, putative	2.07	4270	3233	4125	753	738	704	2063	1562	1993	364	357	340	68	64	65	60	61	66	0.97	1	0
Tb11.v5.0555	hypothetical protein, conserved	2.1	7466	5882	6956	1379	1358	1229	3555	2801	3312	657	647	585	117	115	109	108	111	113	1.02	1	0
Tb11.v5.0556	protein kinase, putative	2.15	1598	1171	1492	266	312	253	743	545	694	124	145	118	24	22	23	20	25	23	1.14	1	0
Tb11.v5.0558	oligosaccharyl transferase subunit, putative	3.13	11864	10729	17777	3475	3771	3053	3790	3428	5680	1110	1205	975	124	141	186	182	208	189	1.13	1	0
Tb11.v5.0559	oligosaccharyl transferase subunit, putative	2.39	9065	8008	13052	2494	2724	2327	3793	3351	5461	1044	1140	974	125	138	179	172	196	189	1.11	1	0
Tb11.v5.0560	leucine-rich repeat protein (LRRP), putative	20.77	24649	17736	22436	3526	3297	2874	1187	854	1080	170	159	138	39	35	35	28	27	27	0.84	1	0
Tb11.v5.0561	fatty acyl CoA synthetase, putative	3.34	11767	9178	10830	2065	2211	1994	3523	2748	3243	618	662	597	116	113	106	102	114	116	1.09	1	0
Tb11.v5.0562	Molybdopterin guanine dinucleotide synthesis protein B, putative	2.03	3885	3057	4142	717	594	545	1914	1506	2040	353	293	268	63	62	67	58	50	52	0.79	1	0
Tb11.v5.0563	periodic tryptophan protein 2, putative	2.01	4276	3367	4002	733	520	489	2127	1675	1991	365	259	243	70	69	65	60	45	47	0.71	1	0
Tb11.v5.0564	protein kinase, putative	2.12	2329	1805	2311	390	398	348	1099	851	1090	184	188	164	36	35	36	30	32	32	0.96	1	0
Tb11.v5.0565	mitochondrial intermediate peptidase, putative	1.94	3198	2358	2750	525	498	439	1648	1215	1418	271	257	226	54	50	47	45	44	44	0.95	1	0
Tb11.v5.0566	hypothetical protein, conserved	2.01	2839	2364	2555	457	484	424	1412	1176	1271	227	241	211	46	48	42	37	42	41	1.05	1	0
Tb11.v5.0567	retrotransposon hot spot (RHS) protein, putative	9.01	22159	17191	21368	3285	3392	2850	2459	1908	2372	365	376	316	81	79	78	60	65	61	0.94	1	0
Tb11.v5.0568	hypothetical protein, conserved	2.17	1633	1240	1489	356	264	280	753	571	686	164	122	129	25	24	23	27	21	25	0.82	1	0
Tb11.v5.0569	amino acid transporter, putative	3.15	8110	6017	7155	1209	1153	1045	2575	1910	2271	384	366	332	85	79	75	63	63	64	0.91	1	0
Tb11.v5.0570	Zinc finger, C3HC4 type (RING finger), putative	1.37	1702	1400	1738	446	364	345	1242	1022	1269	326	266	252	41	42	42	54	46	49	0.95	1	0
Tb11.v5.0571	variant surface glycoprotein (VSG, atypical), putative		2	1	3	1	0	1							0	0	0	0	0	0		0	0
Tb11.v5.0572	RAD50 DNA repair-like protein, putative	1.98	3329	2885	3161	641	646	574	1681	1457	1596	324	326	290	55	60	52	53	56	56	1.06	1	0
Tb11.v5.0573	RAD50 DNA repair-like protein, putative	2.24	2466	2065	2166	409	398	353	1101	922	967	183	178	158	36	38	32	30	31	31	0.98	1	0
Tb11.v5.0574	Organic solute transport protein 1, putative	2.18	1168	866	1051	177	165	172	536	397	482	81	76	79	18	16	16	13	13	15	0.87	1	0
Tb11.v5.0575	hypothetical protein, conserved	2	3537	2922	3521	538	556	520	1769	1461	1761	269	278	260	58	60	58	44	48	50	0.93	1	0
Tb11.v5.0576	receptor-type adenylate cyclase GRESAG 4, putative	18.74	10390	8052	10853	2025	2038	1796	554	430	579	108	109	96	18	18	19	18	19	19	1	1	0
Tb11.v5.0577	casein kinase I, putative	2.13	2120	1570	1758	310	288	244	995	737	825	146	135	115	33	30	27	24	23	22	0.88	1	0
Tb11.v5.0578	Plasma-membrane choline transporter, putative	3.69	17673	13816	15502	2861	3754	3189	4789	3744	4201	775	1017	864	157	154	138	127	175	167	1.32	1	0
Tb11.v5.0579	hypothetical protein, conserved	2.07	10107	8198	9482	1491	1296	1204	4883	3960	4581	720	626	582	160	163	150	118	108	113	0.8	1	0
Tb11.v5.0580	delta-6 fatty acid desaturase, putative	2	1157	903	1351	212	195	202	579	452	676	106	98	101	19	19	22	17	17	20	0.85	1	0
Tb11.v5.0581	exocyst complex component specific domain containing protein, Sec8	3.48	7400	5587	6571	1148	1162	1095	2126	1605	1888	330	334	315	70	66	62	54	58	61	0.99	1	0
Tb11.v5.0582	hypothetical protein, conserved	20.24	8886	6513	7963	1280	1246	1096	439	322	393	63	62	54	14	13	13	10	11	10	0.92	1	0
Tb11.v5.0583	hypothetical protein, conserved	2.06	6853	5197	6205	1096	1032	872	3327	2523	3012	532	501	423	109	104	99	87	86	82	0.92	1	0
Tb11.v5.0584	hypothetical protein, conserved	13.16	27690	21214	25981	4898	5161	4875	2104	1612	1974	372	392	370	69	66	65	61	68	72	1.07	1	0
Tb11.v5.0585	separase, putative	1.91	2428	1960	2514	491	442	433	1271	1026	1316	257	231	227	42	42	43	42	40	44	0.93	1	0
Tb11.v5.0586	hypothetical protein, conserved	2.16	2780	2177	2766	465	491	432	1287	1008	1281	215	227	200	42	42	42	35	39	39	1	1	0
Tb11.v5.0587	protein kinase A regulatory subunit, putative	1.94	11401	9330	9928	1786	1670	1461	5877	4809	5118	921	861	753	193	198	168	151	148	146	0.93	1	0
Tb11.v5.0588	AARP2CN (NUC121) domain containing protein, putative	2.26	2938	2238	2793	419	390	365	1300	990	1236	185	173	162	43	41	41	30	30	31	0.83	1	0
Tb11.v5.0589	Clusterin-associated protein-1, putative	2.07	4789	4052	5087	949	951	779	2314	1957	2457	458	459	376	76	81	81	75	79	73	1.01	1	0
Tb11.v5.0590	SET domain containing protein, putative	1.94	1940	1450	1904	349	285	255	1000	747	981	180	147	131	33	31	32	30	25	25	0.79	1	0
Tb11.v5.0591	hypothetical protein, conserved	2.22	801	594	727	129	115	125	361	268	327	58	52	56	12	11	11	10	9	11	0.82	1	0
Tb11.v5.0592	variant surface glycoprotein (VSG), putative		15	9	21	2	3	3							0	0	0	0	0	0		0	0
Tb11.v5.0593	hypothetical protein, conserved	1.99	3115	2421	2872	575	552	493	1565	1217	1443	289	277	248	51	50	47	48	48	48	1	1	0
Tb11.v5.0594	retrotransposon hot spot (RHS) protein, putative	7.45	55381	44856	52582	9078	8691	8087	7434	6021	7058	1219	1167	1086	244	248	232	200	201	210	0.93	1	0
Tb11.v5.0595	variant surface glycoprotein (VSG), putative		0	0	0	0	0	0							0	0	0	0	0	0		0	0
Tb11.v5.0596	serine/threonine protein kinase, putative	2.28	5058	4136	5292	809	762	693	2218	1814	2321	355	334	304	73	75	76	58	58	59	0.86	1	0
Tb11.v5.0597	hypothetical protein, conserved	2.23	2538	1877	2267	411	408	345	1138	842	1017	184	183	155	37	35	33	30	32	30	1	1	0
Tb11.v5.0598	GIY-YIG catalytic domain containing protein, putative	1.99	2839	2060	2521	507	451	434	1427	1035	1267	255	227	218	47	43	42	42	39	42	0.92	1	0
Tb11.v5.0599	variant surface glycoprotein (VSG), putative	1.9	127	93	128	27	31	19	67	49	67	14	16	10	2	2	2	2	3	2	1.2	0	0
Tb11.v5.0600	HIT zinc finger, putative	2.27	2297	1822	2219	377	350	307	1012	803	978	166	154	135	33	33	32	27	27	26	0.9	1	0
Tb11.v5.0601	major surface protease gp63, putative	5.44	8133	6089	7217	1531	1257	1134	1495	1119	1327	281	231	208	49	46	44	46	40	40	0.88	1	0
Tb11.v5.0602	leucine-rich repeat protein 1 (LRRP1), putative	10.24	33712	24036	31255	4753	4597	4009	3292	2347	3052	464	449	392	108	97	100	76	77	76	0.87	1	0
Tb11.v5.0603	hypothetical protein, conserved	2.07	3982	2748	3545	471	526	439	1924	1328	1713	228	254	212	63	55	56	37	44	41	0.94	1	0
Tb11.v5.0604	hypothetical protein, conserved	2.06	8073	7172	8742	1662	1557	1394	3919	3482	4244	807	756	677	129	144	139	133	130	131	0.95	1	0
Tb11.v5.0605	pyruvate kinase 1, putative	2.01	59122	52931	81248	15977	16053	13726	29414	26334	40422	7949	7987	6829	966	1085	1327	1307	1376	1323	1.04	1	0
Tb11.v5.0606	hypothetical protein, conserved	1.98	1894	1737	1999	455	484	416	957	877	1010	230	244	210	31	36	33	38	42	41	1.17	1	0
Tb11.v5.0607	hypothetical protein, conserved	6.12	175	118	186	54	25	32	29	19	30	9	4	5	1	1	1	1	1	1	0.67	0	0
Tb11.v5.0608	DNA-directed RNA polymerase III largest subunit, putative	1.86	3274	2587	2941	551	507	443	1760	1391	1581	296	273	238	58	57	52	49	47	46	0.92	1	0
Tb11.v5.0609	DNA-directed RNA polymerase III largest subunit, putative	2.15	1884	1532	1838	313	312	295	876	713	855	146	145	137	29	29	28	24	25	27	0.94	1	0
Tb11.v5.0610	variant surface glycoprotein (VSG, atypical), putative		0	0	0	0	0	1							0	0	0	0	0	0		0	0
Tb11.v5.0611	hypothetical protein, conserved	2.06	3798	2987	3527	648	636	551	1844	1450	1712	315	309	267	61	60	56	52	53	52	0.97	1	0
Tb11.v5.0612	MYND finger, putative (=7.7070?)	1.99	2938	2330	3017	473	445	373	1476	1171	1516	238	224	187	48	48	50	39	39	36	0.87	1	0
Tb11.v5.0613	NADH-dependent fumarate reductase, putative	2.79	5488	4248	4549	978	839	743	1967	1523	1630	351	301	266	65	63	54	58	52	52	0.92	1	0
Tb11.v5.0614	hypothetical protein, conserved	2.35	6830	4970	6037	1037	1130	946	2906	2115	2569	441	481	403	95	87	84	73	83	78	1.05	1	0
Tb11.v5.0615	hypothetical protein, conserved	2.24	6524	5191	6503	1278	1351	1139	2913	2317	2903	571	603	508	96	95	95	94	104	98	1.09	1	0
Tb11.v5.0616	paraflagellar rod protein, putative	2.05	4730	3625	4354	912	808	753	2307	1768	2124	445	394	367	76	73	70	73	68	71	0.94	1	0
Tb11.v5.0617	hypothetical protein, conserved	2.08	1701	1253	1537	318	278	252	818	602	739	153	134	121	27	25	24	25	23	23	0.92	1	0
Tb11.v5.0618	hypothetical protein, conserved	2.08	2650	2182	2463	458	467	400	1274	1049	1184	220	225	192	42	43	39	36	39	37	1.03	1	0
Tb11.v5.0619	COG4 transport protein, putative	2.15	6490	5027	5692	1113	1048	912	3019	2338	2647	518	487	424	99	96	87	85	84	82	0.97	1	0
Tb11.v5.0620	COG4 transport protein, putative	2.53	3952	3105	3931	742	761	685	1562	1227	1554	293	301	271	51	51	51	48	52	53	1.04	1	0
Tb11.v5.0621	hypothetical protein, conserved	2.33	4633	3703	4939	924	898	809	1988	1589	2120	397	385	347	65	65	70	65	66	67	0.97	1	0
Tb11.v5.0622	variant surface glycoprotein (VSG, atypical), putative	3.19	347	291	326	55	53	43	109	91	102	17	17	13	4	4	3	3	3	3	0.86	0	0
Tb11.v5.0623	hypothetical protein, conserved	2.3	1371	1183	1463	226	239	244	596	514	636	98	104	106	20	21	21	16	18	21	0.95	1	0
Tb11.v5.0624	retrotransposon hot spot protein (PHS), putative	10.93	38585	29947	35548	5505	5402	4691	3530	2740	3252	504	494	429	116	113	107	83	85	83	0.89	1	0
Tb11.v5.0625	C-terminal motor kinesin, putative	2.68	2930	2097	2966	479	452	431	1093	782	1107	179	169	161	36	32	36	29	29	31	0.88	1	0
Tb11.v5.0626	protein kinase, putative	2.03	2155	1719	1995	331	326	254	1062	847	983	163	161	125	35	35	32	27	28	24	0.93	1	0
Tb11.v5.0627	lipase domain protein, putative	2.25	2481	1902	2777	479	561	600	1103	845	1234	213	249	267	36	35	41	35	43	52	1.12	1	0
Tb11.v5.0628	tubulin binding cofactor c, putative	2.32	3226	2532	3129	624	611	489	1391	1091	1349	269	263	211	46	45	44	44	45	41	1.01	1	0
Tb11.v5.0629	fumarate hydratase, putative	2.16	1236	941	1405	262	301	229	572	436	650	121	139	106	19	18	21	20	24	21	1.14	1	0
Tb11.v5.0630	hypothetical protein, conserved	1.92	4021	3162	3976	751	744	629	2094	1647	2071	391	388	328	69	68	68	64	67	64	1.01	1	0
Tb11.v5.0631	pre-mRNA processing factor 4 (PRP4) like/WD domain, G-beta repeat, putative	1.91	2200	1750	2566	417	425	378	1152	916	1343	218	223	198	38	38	44	36	38	38	0.94	1	0
Tb11.v5.0632	Sel1 repeat, putative	2.39	1226	968	1148	223	218	185	513	405	480	93	91	77	17	17	16	15	16	15	1	1	0
Tb11.v5.0633	protein kinase, putative	1.96	5207	3873	4376	802	745	672	2657	1976	2233	409	380	343	87	81	73	67	65	66	0.92	1	0
Tb11.v5.0634	Uncharacterised ACR, YagE family COG1723, putative	2.54	1223	919	1092	187	161	148	481	362	430	74	63	58	16	15	14	12	11	11	0.81	1	0
Tb11.v5.0635	tRNA modification enzyme, putative	2.18	1690	1339	1551	277	234	220	775	614	711	127	107	101	25	25	23	21	18	20	0.8	1	0
Tb11.v5.0636	C-terminal motor kinesin	1.99	46993	38187	47982	9903	9993	8736	23615	19189	24112	4976	5022	4390	775	791	792	818	865	851	1.07	1	0
Tb11.v5.0637	hypothetical protein, conserved	1.97	1276	928	1166	175	175	161	648	471	592	89	89	82	21	19	19	15	15	16	0.86	1	0
Tb11.v5.0638	serine carboxypeptidase III precursor, putative (CBP1)	3.57	13341	10368	11820	2434	3020	2532	3737	2904	3311	682	846	709	123	120	109	112	146	137	1.32	1	0
Tb11.v5.0639	hypothetical protein, conserved	2.04	3616	3479	4350	901	872	823	1773	1705	2132	442	427	403	58	70	70	73	74	78	1.03	1	0
Tb11.v5.0640	minichromosome maintenance (MCM) complex subunit, putative	1.97	1430	1109	1423	238	223	204	726	563	722	121	113	104	24	23	24	20	19	20	0.84	1	0
Tb11.v5.0641	major vault protein, putative	2.16	3453	2788	3995	698	746	655	1599	1291	1850	323	345	303	52	53	61	53	59	59	1.03	1	0
Tb11.v5.0642	hypothetical protein, conserved	2.09	2246	1774	2134	409	375	361	1075	849	1021	196	179	173	35	35	34	32	31	34	0.93	1	0
Tb11.v5.0643	dual specificity protein phosphatase, putative	2.08	3002	2370	2846	638	491	525	1443	1139	1368	307	236	252	47	47	45	50	41	49	0.85	1	0
Tb11.v5.0644	serine/threonine-protein kinase, putative	1.98	1289	1024	1244	184	186	172	651	517	628	93	94	87	21	21	21	15	16	17	0.86	1	0
Tb11.v5.0645	variant surface glycoprotein (VSG), putative		0	1	3	1	1	0							0	0	0	0	0	0		0	0
Tb11.v5.0646	CYC2-like cyclin, putative	2.04	4335	3294	3976	846	830	693	2125	1615	1949	415	407	340	70	67	64	68	70	66	1.05	1	0
Tb11.v5.0647	hypothetical protein, conserved	2.22	2286	1944	2406	454	434	397	1030	876	1084	205	195	179	34	36	36	34	34	35	0.96	1	0
Tb11.v5.0648	hypothetical protein, conserved	2.02	2784	2040	2959	451	508	427	1378	1010	1465	223	251	211	45	42	48	37	43	41	1	1	0
Tb11.v5.0649	serine palmitoyltransferase, putative	2.29	4675	3515	3938	780	824	677	2041	1535	1720	341	360	296	67	63	56	56	62	57	1.1	1	0
Tb11.v5.0650	enolase, putative	2	62519	51051	69638	14362	13553	11776	31260	25526	34819	7181	6777	5888	1026	1052	1143	1181	1167	1141	1	1	0
Tb11.v5.0651	Vps53-like, N-terminal, putative	2	4346	3244	4110	635	739	666	2173	1622	2055	318	370	333	71	67	67	52	64	65	1.07	1	0
Tb11.v5.0652	protein kinase, putative	2.02	2811	2165	2395	445	420	399	1392	1072	1186	220	208	198	46	44	39	36	36	38	0.95	1	0
Tb11.v5.0653	trypanothione synthetase, putative	1.89	4658	3607	4004	780	939	789	2465	1908	2119	413	497	417	81	79	70	68	86	81	1.24	1	0
Tb11.v5.0654	receptor-type adenylate cyclase, putative	2.82	1292	978	1168	245	220	176	458	347	414	87	78	62	15	14	14	14	13	12	0.9	1	0
Tb11.v5.0655	trypanosome RHS family, putative	10.45	29431	25518	30393	5008	5048	4406	2816	2442	2908	479	483	422	92	101	95	79	83	82	0.95	1	0
Tb11.v5.0656	hypothetical protein, conserved	2.58	2522	2083	2519	450	467	402	978	807	976	174	181	156	32	33	32	29	31	30	1	1	0
Tb11.v5.0657	hypothetical protein, conserved	2.36	4854	3524	4236	727	763	621	2057	1493	1795	308	323	263	68	62	59	51	56	51	1.01	1	0
Tb11.v5.0658	hypothetical protein, conserved		0	1	10	1	0	0							0	0	0	0	0	0		0	0
Tb11.v5.0659	MIF4G domain containing protein, putative	2.03	4806	3794	4295	856	698	586	2367	1869	2116	422	344	289	78	77	69	69	59	56	0.85	1	0
Tb11.v5.0660	histone deacetylase, putative	2.19	3787	3011	3819	668	671	615	1729	1375	1744	305	306	281	57	57	57	50	53	54	0.98	1	0
Tb11.v5.0661	DNA polymerase kappa, putative	26.46	2751	2073	2549	340	368	297	104	78	96	13	14	11	3	3	3	2	2	2	0.67	0	0
Tb11.v5.0662	variant surface glycoprotein (VSG), putative		0	0	0	0	0	0							0	0	0	0	0	0		0	0
Tb11.v5.0663	hypothetical protein, conserved	1.69	2066	1502	1627	256	274	220	1222	889	963	151	162	130	40	37	32	25	28	25	0.97	1	0
Tb11.v5.0664	hypothetical protein, conserved	5.71	15137	11991	14255	2785	2515	2452	2651	2100	2496	488	440	429	87	87	82	80	76	83	0.93	1	0
Tb11.v5.0665	hypothetical protein, conserved	2.24	2042	1566	1916	422	376	316	912	699	855	188	168	141	30	29	28	31	29	27	0.97	1	0
Tb11.v5.0666	hypothetical protein, conserved	1.99	1378	1027	1237	267	239	189	692	516	622	134	120	95	23	21	20	22	21	18	0.98	1	0
Tb11.v5.0667	poly(A) polymerase, putative	2.95	1278	1040	1326	220	219	218	433	353	449	75	74	74	14	15	15	12	13	14	0.93	1	0
Tb11.v5.0668	Protein sisulphide isomerase	2.14	41549	37967	51121	10420	10075	9323	19415	17742	23888	4869	4708	4357	637	731	784	800	811	844	1.02	1	0
Tb11.v5.0669	zinc carboxypeptidase, putative	1.93	7222	5856	7809	1623	1425	1289	3742	3034	4046	841	738	668	123	125	133	138	127	129	0.93	1	0
Tb11.v5.0670	retrotransposon hot spot (RHS) protein, putative	5.57	34527	27541	32462	4965	4968	4452	6199	4945	5828	891	892	799	203	204	191	146	154	155	0.91	1	0
Tb11.v5.0671	protein kinase A catalytic subunit, putative	2.07	2257	1892	2283	387	315	294	1090	914	1103	187	152	142	36	38	36	31	26	28	0.76	1	0
Tb11.v5.0672	cardiolipin synthetase, putative	2.11	2594	1922	2476	452	393	356	1229	911	1173	214	186	169	40	38	39	35	32	33	0.85	1	0
Tb11.v5.0673	variant surface glycoprotein (VSG), putative	2.9	159	132	133	29	22	34	55	46	46	10	8	12	2	2	2	2	1	2	0.4	0	0
Tb11.v5.0674	protein phosphatase 2A regulatory subunit, putative	2.43	3085	2374	2870	508	507	479	1270	977	1181	209	209	197	42	40	39	34	36	38	0.97	1	0
Tb11.v5.0675	ubiquitin-activating enzyme E1, putative	2.34	6802	5154	6379	954	1010	826	2907	2203	2726	408	432	353	95	91	89	67	74	68	0.94	1	0
Tb11.v5.0676	expression site-associated gene 2 (ESAG2) protein, putative	10.68	5356	4648	7343	967	1558	1227	501	435	688	91	146	115	16	18	23	15	25	22	1.28	1	0
Tb11.v5.0677	expression site-associated gene 11 (ESAG11) protein, putative	3.08	4329	4063	5799	967	1114	920	1406	1319	1883	314	362	299	46	54	62	52	62	58	1.08	1	0
Tb11.v5.0678	hypothetical protein, conserved	2.57	2614	1948	2483	475	438	409	1017	758	966	185	170	159	33	31	32	30	29	31	0.92	1	0
Tb11.v5.0679	transporter, putative	2.49	1973	1524	2002	389	398	332	792	612	804	156	160	133	26	25	26	26	28	26	1.06	1	0
Tb11.v5.0680	hypothetical protein, conserved	1.96	3400	2750	3261	591	604	502	1735	1403	1664	302	308	256	57	58	55	50	53	50	1	1	0
Tb11.v5.0681	hypothetical protein, conserved	44.36	68233	53975	68230	10244	11916	8912	1538	1217	1538	231	269	201	50	50	50	38	46	39	1.03	1	0
Tb11.v5.0682	variant surface glycoprotein (VSG), putative	3.88	211	131	210	23	34	23	54	34	54	6	9	6	2	1	2	1	2	1	1	0	0
Tb11.v5.0683	variant surface glycoprotein (VSG), putative	2.15	3061	2290	2885	544	490	416	1424	1065	1342	253	228	193	47	44	44	42	39	37	0.9	1	0
Tb11.v5.0684	eIF5	2.01	5922	4563	5544	997	875	828	2946	2270	2758	496	435	412	97	94	91	82	75	80	0.86	1	0
Tb11.v5.0685	hypothetical protein, conserved	2.29	1397	1130	1360	254	285	242	610	493	594	111	124	106	20	20	19	18	21	21	1.11	1	0
Tb11.v5.0686	hypothetical protein, conserved	1.99	1660	1179	1457	275	266	235	834	592	732	138	134	118	27	24	24	23	23	23	0.96	1	0
Tb11.v5.0687	Pescadillo N-terminus/BRCA1 C Terminus (BRCT) domain containing protein, putative	2.11	4880	3729	4222	813	618	570	2313	1767	2001	385	293	270	76	73	66	63	50	52	0.77	1	0
Tb11.v5.0688	tRNA pseudouridine synthase D (TruD), putative	2.14	2958	2420	2730	483	458	406	1382	1131	1276	226	214	190	45	47	42	37	37	37	0.93	1	0
Tb11.v5.0689	NOT2 / NOT3 / NOT5 family, putative	2.1	2052	1547	1551	308	251	234	977	737	739	147	120	111	32	30	24	24	21	22	0.86	1	0
Tb11.v5.0690	hypothetical protein, conserved	2.22	949	710	952	179	127	136	427	320	429	81	57	61	14	13	14	13	10	12	0.71	1	0
Tb11.v5.0691	hypothetical protein, conserved	2.05	1433	1125	1280	238	217	210	699	549	624	116	106	102	23	23	20	19	18	20	0.9	1	0
Tb11.v5.0692	Thiopurine S-methyltransferase (TPMT), putative	2.24	2098	1622	2125	376	368	315	937	724	949	168	164	141	31	30	31	28	28	27	0.93	1	0
Tb11.v5.0693	retrotransposon hot spot (RHS) protein, putative	8.2	1711	1426	1587	308	279	263	209	174	194	38	34	32	7	7	6	6	6	6	0.92	0	0
Tb11.v5.0694	glycosyltransferase, putative	2.09	2928	2234	2919	543	548	449	1401	1069	1397	260	262	215	46	44	46	43	45	42	1	1	0
Tb11.v5.0695	variant surface glycoprotein (VSG), putative		1	0	1	0	0	1							0	0	0	0	0	0		0	0
Tb11.v5.0696	TerD domain containing protein, putative	3.4	3378	2845	3389	621	623	551	994	837	997	183	183	162	33	34	33	30	32	31	1	1	0
Tb11.v5.0697	aminopeptidase P1, putative	2.01	3274	2501	2897	566	502	460	1629	1244	1441	282	250	229	53	51	47	46	43	44	0.91	1	0
Tb11.v5.0698	dynein heavy chain, putative	2.08	4629	3462	4600	675	785	683	2225	1664	2212	325	377	328	73	69	73	53	65	64	1.02	1	0
Tb11.v5.0699	Trypanosomal VSG domain containing protein, putative	3.01	336	261	345	45	79	80	112	87	115	15	26	27	4	4	4	2	4	5	1.14	0	0
Tb11.v5.0700	hypothetical protein, conserved	2.17	1226	947	1321	254	222	205	565	436	609	117	102	94	19	18	20	19	18	18	0.9	1	0
Tb11.v5.0701	ubiquitin carboxyl-terminal hydrolase, putative	1.96	877	713	745	153	147	139	447	364	380	78	75	71	15	15	12	13	13	14	1	1	0
Tb11.v5.0702	calpain-like cysteine peptidase, putative	2.46	10407	7352	10600	1683	2090	1704	4230	2989	4309	684	850	693	139	123	141	112	146	134	1.15	1	0
Tb11.v5.0703	leucine-rich repeat protein (LRRP), putative	5.33	20248	14842	18858	3025	2900	2656	3799	2785	3538	568	544	498	125	115	116	93	94	97	0.9	1	0
Tb11.v5.0704	variant surface glycoprotein (VSG), putative		0	0	0	0	0	0							0	0	0	0	0	0		0	0
Tb11.v5.0705	hypothetical protein, conserved	3.14	19339	14681	18965	4226	3171	2621	6159	4675	6040	1346	1010	835	202	193	198	221	174	162	0.83	1	0
Tb11.v5.0706	hypothetical protein, conserved	1.87	1740	1510	1852	396	333	310	930	807	990	212	178	166	31	33	32	35	31	32	0.91	1	0
Tb11.v5.0707	hypothetical protein, conserved	2.04	3000	2364	2803	525	504	435	1471	1159	1374	257	247	213	48	48	45	42	43	41	0.98	1	0
Tb11.v5.0708	variant surface glycoprotein (VSG), putative		0	0	0	0	0	0							0	0	0	0	0	0		0	0
Tb11.v5.0709	variant surface glycoprotein (VSG), putative		0	0	1	1	1	0							0	0	0	0	0	0		0	0
Tb11.v5.0710	Gp63-1 surface protease homolog, putative	11.97	4486	3775	5381	1045	1291	1082	375	315	450	87	108	90	12	13	15	14	19	17	1.27	1	0
Tb11.v5.0711	DNA polymerase kappa, putative	19.19	5326	4271	5424	897	933	765	278	223	283	47	49	40	9	9	9	8	8	8	0.89	0	0
Tb11.v5.0712	calcium-transporting ATPase, putative	1.84	2261	1720	2359	379	394	344	1229	935	1282	206	214	187	40	39	42	34	37	36	0.96	1	0
Tb11.v5.0713	retrotransposon hot spot (RHS) protein, putative	1.81	32386	25290	30546	4802	4588	4002	17893	13972	16876	2653	2535	2211	587	576	554	436	437	428	0.88	1	0
Tb11.v5.0714	DRBD5	2.14	4854	3325	4013	676	617	538	2268	1554	1875	316	288	251	74	64	62	52	50	49	0.87	1	0
Tb11.v5.0715	hypothetical protein, conserved	2.98	484	433	540	105	73	99	162	145	181	35	24	33	5	6	6	6	4	6	0.62	0	0
Tb11.v5.0716	hypothetical protein, conserved	1.83	1746	1392	1538	339	292	288	954	761	840	185	160	157	31	31	28	30	28	30	0.95	1	0
Tb11.v5.0717	hypothetical protein, conserved	2.03	2684	2185	2224	502	417	390	1322	1076	1096	247	205	192	43	44	36	41	35	37	0.9	1	0
Tb11.v5.0718	Protein kinase	2.01	6163	4935	5864	1042	1071	873	3066	2455	2917	518	533	434	101	101	96	85	92	84	1.01	1	0
Tb11.v5.0719	hypothetical protein, conserved	2.41	2153	1653	2058	329	385	301	893	686	854	137	160	125	29	28	28	23	28	24	1.08	1	0
Tb11.v5.0720	hypothetical protein, conserved	1.96	2733	2332	2773	539	548	490	1394	1190	1415	275	280	250	46	49	46	45	48	48	1.04	1	0
Tb11.v5.0721	hypothetical protein, conserved	1.95	3011	2395	2803	531	508	477	1544	1228	1437	272	261	245	51	51	47	45	45	47	0.97	1	0
Tb11.v5.0722	variant surface glycoprotein (VSG)-related, putative		70	63	72	11	15	13							0	0	0	0	0	0	0	0	0
Tb11.v5.0723	DNA-directed RNA polymerase I largest subunit, putative	2.29	8146	6272	8315	1291	1183	1001	3557	2739	3631	564	517	437	117	113	119	93	89	85	0.84	1	0
Tb11.v5.0724	hypothetical protein, conserved	1.99	2563	2196	2541	570	487	428	1288	1104	1277	286	245	215	42	46	42	47	42	42	0.93	1	0
Tb11.v5.0725	hypothetical protein, conserved	2	2638	2045	2520	491	542	441	1319	1023	1260	246	271	221	43	42	41	40	47	43	1.15	1	0
Tb11.v5.0726	WD domain, G-beta repeat/Utp13 specific WD40 associated domain containing protein, putative	2.53	3135	2349	3009	541	496	379	1239	928	1189	214	196	150	41	38	39	35	34	29	0.91	1	0
Tb11.v5.0727	flagellum transition zone component, putative	2.26	5089	3918	4695	871	879	841	2252	1734	2077	385	389	372	74	71	68	63	67	72	1.02	1	0
Tb11.v5.0728	14-3-3 protein, putative		0	0	0	0	0	0							0	0	0	0	0	0		0	0
Tb11.v5.0729	ribokinase, putative		0	0	0	0	0	0							0	0	0	0	0	0		0	0
Tb11.v5.0730	PUF4 pumillio RNA binding protein 4, putative	2.16	1574	1141	1377	252	261	212	729	528	638	117	121	98	24	22	21	19	21	19	1.02	1	0
Tb11.v5.0731	65 kDa invariant surface glycoprotein, putative	1.29	20904	19618	27271	4820	6251	5185	16205	15208	21140	3736	4846	4019	532	627	694	614	835	779	1.28	1	0
Tb11.v5.0732	Hexokinase	2.05	48641	39705	36333	7766	5929	6250	23727	19368	17723	3788	2892	3049	779	798	582	623	498	591	0.83	1	0
Tb11.v5.0733	dynein heavy chain, cytosolic, putative	2.14	4321	3288	4116	729	830	670	2019	1536	1923	341	388	313	66	63	63	56	67	61	1.12	1	0
Tb11.v5.0734	multidrug resistance-associated protein, putative	2.11	3654	2877	3397	571	601	520	1732	1364	1610	271	285	246	57	56	53	45	49	48	0.99	1	0
Tb11.v5.0735	hypothetical protein, conserved	2.33	2679	2284	2787	476	498	416	1150	980	1196	204	214	179	38	40	39	34	37	35	1	1	0
Tb11.v5.0736	ABC1 family, putative	2.44	1632	1130	1452	236	250	219	669	463	595	97	102	90	22	19	20	16	18	17	0.97	1	0
Tb11.v5.0737	hypothetical protein, conserved	3.52	1803	1315	1718	261	232	225	512	374	488	74	66	64	17	15	16	12	11	12	0.76	1	0
Tb11.v5.0738	thymidylate kinase, putative	3.57	2222	1663	2161	390	387	329	622	466	605	109	108	92	20	19	20	18	19	18	0.97	1	0
Tb11.v5.0739	hypothetical protein, conserved	2.02	5152	3774	4219	925	907	793	2550	1868	2089	458	449	393	84	77	69	75	77	76	1.06	1	0
Tb11.v5.0740	hypothetical protein, conserved	2.62	2828	2387	2841	560	511	435	1079	911	1084	214	195	166	35	38	36	35	34	32	0.94	1	0
Tb11.v5.0741	hypothetical protein, conserved	3.05	4202	3543	4468	978	778	724	1378	1162	1465	321	255	237	45	48	48	53	44	46	0.86	1	0
Tb11.v5.0742	proteasome beta-1 subunit, putative	2.21	3291	2595	2926	585	467	492	1489	1174	1324	265	211	223	49	48	43	44	36	43	0.82	1	0
Tb11.v5.0743	Mitochondrial ribosomal death-associated protein 3, putative	2.91	636	479	596	111	95	87	219	165	205	38	33	30	7	7	7	6	6	6	0.86	0	0
Tb11.v5.0744	phosphatidylinositol 3-kinase tor, putative	2.1	1897	1416	1840	302	326	268	903	674	876	144	155	128	30	28	29	24	27	25	1	1	0
Tb11.v5.0745	hypothetical protein, conserved	1.9	2522	1909	2366	483	482	460	1327	1005	1245	254	254	242	44	41	41	42	44	47	1.05	1	0
Tb11.v5.0746	tatD related deoxyribonuclease, putative	1.5	1839	1320	1517	279	237	232	1226	880	1011	186	158	155	40	36	33	31	27	30	0.83	1	0
Tb11.v5.0747	variant surface glycoprotein (VSG), putative	13.08	188	152	210	21	31	35	14	12	16	2	2	3	0	0	1	0	0	1	0	0	0
Tb11.v5.0748	ABC transporter, putative	2.28	3571	2929	3602	719	615	554	1566	1285	1580	315	270	243	51	53	52	52	47	47	0.9	1	0
Tb11.v5.0749	structural maintenance of chromosome 4, putative	2.02	2902	2267	2786	495	461	404	1437	1122	1379	245	228	200	47	46	45	40	39	39	0.91	1	0
Tb11.v5.0750	dual specificity protein phosphatase, putative	2.33	2942	2259	2618	602	520	420	1263	970	1124	258	223	180	41	40	37	42	38	35	0.95	1	0
Tb11.v5.0751	dual specificity protein phosphatase, putative	2.15	1533	1116	1357	285	238	208	713	519	631	133	111	97	23	21	21	22	19	19	0.86	1	0
Tb11.v5.0752	expression site-associated gene 3 (ESAG3) protein, putative	1.74	16942	19387	28828	3520	4976	4077	9737	11142	16568	2023	2860	2343	320	459	544	333	493	454	1.12	1	0
Tb11.v5.0753	hypothetical protein, conserved	2.79	9900	9237	10493	2189	2108	1834	3548	3311	3761	785	756	657	116	136	123	129	130	127	1.03	1	0
Tb11.v5.0754	variant surface glycoprotein (VSG), putative		2	0	3	0	1	0							0	0	0	0	0	0		0	0
Tb11.v5.0755	variant surface glycoprotein (VSG), putative		0	2	0	4	0	2							0	0	0	0	0	0		0	0
Tb11.v5.0756	DNA polymerase kappa, putative	10.59	2880	2193	2836	398	419	344	272	207	268	38	40	32	9	9	9	6	7	6	0.88	0	0
Tb11.v5.0757	stress-inducible protein STI1-like, putative	3.44	3434	2870	3463	628	627	583	998	834	1007	183	182	169	33	34	33	30	31	33	0.97	1	0
Tb11.v5.0758	Protein of unknown function (DUF1448), putative	1.97	1241	950	1149	243	234	201	630	482	583	123	119	102	21	20	19	20	20	20	1	1	0
Tb11.v5.0759	variant surface glycoprotein (VSG), putative		0	0	0	0	0	0							0	0	0	0	0	0		0	0
Tb11.v5.0760	RNA polymerase III transcription factor (TF)IIIC subunit, putative	2.07	2367	1816	2201	372	386	359	1143	877	1063	180	186	173	38	36	35	30	32	34	0.97	1	0
Tb11.v5.0761	proteasome activator protein pa26, putative	2.57	3770	2938	3991	677	671	637	1467	1143	1553	263	261	248	48	47	51	43	45	48	0.95	1	0
Tb11.v5.0762	hypothetical protein, conserved	25.44	53497	37655	52360	9072	11102	9046	2103	1480	2058	357	436	356	69	61	68	59	75	69	1.17	1	0
Tb11.v5.0763	MIF4G domain containing protein, putative	2.2	6102	4640	5653	987	887	757	2774	2109	2570	449	403	344	91	87	84	74	69	67	0.87	1	0
Tb11.v5.0764	DNA polymerase kappa, putative	11.75	7104	5688	7143	1117	1165	963	605	484	608	95	99	82	20	20	20	16	17	16	0.92	1	0
Tb11.v5.0765	N-acetylglucosaminyl-phosphatidylinositol biosynthetic protein, putative	2.24	1423	1237	1579	263	315	218	635	552	705	117	141	97	21	23	23	19	24	19	1.12	1	0
Tb11.v5.0766	folate transporter, putative	2.4	5297	4095	5355	1123	1011	908	2207	1706	2231	468	421	378	72	70	73	77	73	73	0.97	1	0
Tb11.v5.0767	60S ribosomal protein L40-ubiquitin	2.03	4954	3988	4643	819	893	775	2440	1965	2287	403	440	382	80	81	75	66	76	74	1.07	1	0
Tb11.v5.0768	aspartyl aminopeptidase, putative	2.11	3669	2777	3199	546	585	497	1739	1316	1516	259	277	236	57	54	50	43	48	46	1.02	1	0
Tb11.v5.0769	variant surface glycoprotein (VSG), putative		0	0	0	0	0	0							0	0	0	0	0	0		0	0
Tb11.v5.0770	hypothetical protein, conserved	1.97	612	408	582	99	98	105	311	207	295	50	50	53	10	9	10	8	9	10	0.95	0	0
Tb11.v5.0771	hypothetical protein, conserved	2.02	514	386	422	70	65	78	254	191	209	35	32	39	8	8	7	6	6	8	0.86	0	0
Tb11.v5.0772	expression site-associated gene 9 (ESAG9) protein, putative	1.48	12	7	19	3	2	3	8	5	13	2	1	2	0	0	0	0	0	0		0	0
Tb11.v5.0773	hypothetical protein, conserved	2.14	3221	2550	2744	571	530	467	1505	1192	1282	267	248	218	49	49	42	44	43	42	0.99	1	0
Tb11.v5.0774	dihydrolipoamide acetyltransferase precursor, putative	2.02	2935	2123	2121	371	427	389	1453	1051	1050	184	211	193	48	43	34	30	36	37	1.11	1	0
Tb11.v5.0775	methyltransferase domain containing protein, putative	2.46	729	493	750	124	146	119	296	200	305	50	59	48	10	8	10	8	10	9	1.05	0	0
Tb11.v5.0776	variant surface glycoprotein (VSG) pseudogene, putative		0	0	0	0	0	1							0	0	0	0	0	0		0	0
Tb11.v5.0777	paraflagellar rod protein, putative	2.52	1987	1566	1875	369	329	302	788	621	744	146	131	120	26	26	24	24	23	23	0.94	1	0
Tb11.v5.0778	chaperone protein DNAj, putative	3.11	3863	2915	3867	591	591	550	1242	937	1243	190	190	177	41	39	41	31	33	34	0.9	1	0
Tb11.v5.0779	hypothetical protein, conserved	2.12	5585	4291	5174	1067	1091	898	2634	2024	2441	503	515	424	86	83	80	83	89	82	1.09	1	0
Tb11.v5.0780	ABC transporter, putative	2.07	783	533	732	141	147	117	378	257	354	68	71	57	12	11	12	11	12	11	1	1	0
Tb11.v5.0781	MIZ/SP-RING zinc finger, putative	2.14	1093	877	1177	196	210	173	511	410	550	92	98	81	17	17	18	15	17	16	1	1	0
Tb11.v5.0782	hypothetical protein, conserved	2.03	3143	2583	3185	617	624	546	1548	1272	1569	304	307	269	51	52	52	50	53	52	1.03	1	0
Tb11.v5.0783	methionine aminopeptidase 2, putative	2.04	2211	1789	2041	397	347	272	1084	877	1000	195	170	133	36	36	33	32	29	26	0.88	1	0
Tb11.v5.0784	receptor-type adenylate cyclase GRESAG 4, putative	2.71	1142	890	1083	205	211	227	421	328	400	76	78	84	14	14	13	12	13	16	1	1	0
Tb11.v5.0785	variant surface glycoprotein (VSG), putative		0	0	1	0	0	0							0	0	0	0	0	0		0	0
Tb11.v5.0786	variant surface glycoprotein (VSG), putative		0	1	5	0	1	0							0	0	0	0	0	0		0	0
Tb11.v5.0787	kinesin, putative	2.99	2052	1574	1857	307	361	313	686	526	621	103	121	105	23	22	20	17	21	20	1.11	1	0
Tb11.v5.0788	expression site-associated gene 2 (ESAG2) protein, putative	1.79	8350	7781	10219	1712	2238	1880	4665	4347	5709	956	1250	1050	153	179	187	157	215	203	1.25	1	0
Tb11.v5.0789	expression site-associated gene 2 (ESAG2) protein, putative	10	4222	3608	5455	679	1068	834	422	361	546	68	107	83	14	15	18	11	18	16	1.2	1	0
Tb11.v5.0790	hypothetical protein, conserved	2.03	1214	890	954	194	190	176	598	438	470	96	94	87	20	18	15	16	16	17	1	1	0
Tb11.v5.0791	ABC transporter, putative	2.14	3721	3043	3615	616	572	552	1739	1422	1689	288	267	258	57	59	55	47	46	50	0.89	1	0
Tb11.v5.0792	DNA polymerase theta (helicase domain only), putative	3.93	6651	5835	7424	1327	1218	1129	1692	1485	1889	338	310	287	56	61	62	56	53	56	0.89	1	0
Tb11.v5.0793	FAT domain/Rapamycin binding domain/Phosphatidylinositol 3- and 4-kinase, putative	2.25	5806	4454	5171	950	988	842	2580	1980	2298	422	439	374	85	82	75	69	76	72	1.05	1	0
Tb11.v5.0794	PHD-zinc-finger like domain containing protein, putative	2.09	1112	819	1153	206	202	170	532	392	552	99	97	81	17	16	18	16	17	16	0.97	1	0
Tb11.v5.0795	hypothetical protein, conserved		0	0	0	0	0	0							0	0	0	0	0	0		0	0
Tb11.v5.0796	hypothetical protein, conserved	2.75	1187	964	1373	255	265	235	432	351	499	93	96	85	14	14	16	15	17	16	1.06	1	0
Tb11.v5.0797	Flagellar calcium binding protein	8.18	18860	17351	26551	4704	5063	4352	2306	2121	3246	575	619	532	76	87	107	95	107	103	1.05	1	0
Tb11.v5.0798	flagellar calcium-binding protein	6.7	14059	13079	19686	3583	3890	3288	2098	1952	2938	535	581	491	69	80	96	88	100	95	1.08	1	0
Tb11.v5.0799	hypothetical protein, conserved	1.96	518	383	477	101	109	96	264	195	243	52	56	49	9	8	8	9	10	9	1.11	0	0
Tb11.v5.0800	retrotransposon hot spot (RHS) protein, putative	5.09	16895	16056	17646	3755	3440	3248	3319	3154	3467	738	676	638	109	130	114	121	116	124	0.98	1	0
Tb11.v5.0801	hypothetical protein, conserved	8.69	415	310	373	79	59	70	48	36	43	9	7	8	2	1	1	1	1	2	0.67	0	0
Tb11.v5.0802	hypothetical protein, conserved	2.11	890	637	1000	134	156	158	422	302	474	64	74	75	14	12	16	11	13	15	0.93	1	0
Tb11.v5.0803	variant surface glycoprotein (VSG, atypical), putative	2.14	249	215	239	56	43	41	116	100	112	26	20	19	4	4	4	4	3	4	0.67	0	0
Tb11.v5.0804	variant surface glycoprotein (VSG, atypical), putative		0	0	0	0	0	0							0	0	0	0	0	0		0	0
Tb11.v5.0805	hypothetical protein, conserved	2.03	1472	1219	1523	290	345	285	725	600	750	143	170	140	24	25	25	24	29	27	1.16	1	0
Tb11.v5.0806	hypothetical protein, conserved	2.04	1586	1275	1505	272	281	212	777	625	738	133	138	104	26	26	24	22	24	20	1.02	1	0
Tb11.v5.0807	ribonuclease, putative	1.96	4274	3208	3382	652	618	536	2181	1637	1726	333	315	273	72	67	57	55	54	53	0.96	1	0
Tb11.v5.0808	hypothetical protein, conserved	1.99	3442	2531	2923	573	585	513	1730	1272	1469	288	294	258	57	52	48	47	51	50	1.06	1	0
Tb11.v5.0809	TPR repeat, putative	1.99	2669	2193	2310	439	433	387	1341	1102	1161	221	218	194	44	45	38	36	38	38	1.01	1	0
Tb11.v5.0810	glutamyl-tRNA synthetase, putative	2.24	7433	5950	7114	1089	1013	863	3318	2656	3176	486	452	385	109	109	104	80	78	75	0.84	1	0
Tb11.v5.0811	structural maintenance of chromosome 2, putative	2.17	5729	4654	5620	1166	1155	919	2640	2145	2590	537	532	424	87	88	85	88	92	82	1.06	1	0
Tb11.v5.0812	signal recognition particle protein, putative	2.22	3190	2539	3109	551	556	507	1437	1144	1400	248	250	228	47	47	46	41	43	44	0.98	1	0
Tb11.v5.0813	expression site-associated gene 3 (ESAG3)-like protein	2.66	1458	1351	1657	245	265	242	548	508	623	92	100	91	18	21	20	15	17	18	0.94	1	0
Tb11.v5.0814	expression site-associated gene 3 (ESAG3)-like protein	2.01	2627	2300	2614	470	477	415	1307	1144	1300	234	237	206	43	47	43	38	41	40	1	1	0
Tb11.v5.0815	hypothetical protein, conserved	3.86	1017	769	912	100	109	91	263	199	236	26	28	24	9	8	8	4	5	5	0.77	0	0
Tb11.v5.0816	expression site-associated gene 2 (ESAG2) protein, putative	7.38	6618	5637	8034	1127	1639	1217	897	764	1089	153	222	165	29	31	36	25	38	32	1.23	1	0
Tb11.v5.0817	ubiquitin-protein ligase, putative	2.31	4267	3160	3819	653	755	657	1847	1368	1653	283	327	284	61	56	54	47	56	55	1.1	1	0
Tb11.v5.0818	peroxin-2 PEX2	2.1	1819	1496	1727	358	330	295	866	712	822	170	157	140	28	29	27	28	27	27	0.96	1	0
Tb11.v5.0819	kinesin, putative	2.1	1493	1117	1265	251	235	188	711	532	602	120	112	90	23	22	20	20	19	17	0.93	1	0
Tb11.v5.0820	branched-chain amino acid aminotransferase, putative	3.71	9957	8054	11083	2195	1828	1584	2684	2171	2987	592	493	427	88	89	98	97	85	83	0.87	1	0
Tb11.v5.0821	receptor-type adenylate cyclase GRESAG 4, putative	3.22	7789	6072	8424	1372	1679	1498	2419	1886	2616	426	521	465	79	78	86	70	90	90	1.15	1	0
Tb11.v5.0822	ATP synthase, putative	1.86	2763	2182	2552	503	502	467	1485	1173	1372	270	270	251	49	48	45	44	47	49	1.04	1	0
Tb11.v5.0823	hypothetical protein, conserved	2.1	1954	1415	1760	374	378	257	930	674	838	178	180	122	31	28	28	29	31	24	1.07	1	0
Tb11.v5.0824	hypothetical protein, conserved	2.66	684	472	628	111	118	106	257	177	236	42	44	40	8	7	8	7	8	8	1	0	0
Tb11.v5.0825	fatty acyl CoA synthetase, putative	2.2	5305	4168	4748	789	722	668	2411	1895	2158	359	328	304	79	78	71	59	56	59	0.85	1	0
Tb11.v5.0826	expression site-associated gene (ESAG) protein, putative	2	5878	4449	6617	1449	2986	2634	2939	2225	3309	725	1493	1317	96	92	109	119	257	255	2.24	1	1
Tb11.v5.0827	Nucleoporin NUP-1 protein, putative	16.59	78524	61440	79183	14317	15618	13087	4733	3703	4773	863	941	789	155	153	157	142	162	153	1.08	1	0
Tb11.v5.0828	hypothetical protein, conserved	3.09	1898	1582	1739	347	217	256	614	512	563	112	70	83	20	21	18	18	12	16	0.65	1	3
Tb11.v5.0829	variant surface glycoprotein (VSG, atypical), putative	2.04	14	7	15	0	1	0	7	3	7	0	0	0	0	0	0	0	0	0		0	0
Tb11.v5.0830	receptor-type adenylate cyclase GRESAG 4, putative	6.78	4555	3567	4598	920	882	791	672	526	678	136	130	117	22	22	22	22	22	23	0.98	1	0
Tb11.v5.0831	kinesin motor domain containing protein, putative	2.55	4085	3178	4352	800	754	646	1602	1246	1707	314	296	253	53	51	56	52	51	49	0.94	1	0
Tb11.v5.0832	methyltransferase domain containing protein, putative	2.03	1424	1079	1415	192	194	171	701	532	697	95	96	84	23	22	23	16	17	16	0.85	1	0
Tb11.v5.0833	kinesin, putative	16.2	38585	30290	36615	6533	7250	5969	2382	1870	2260	403	448	368	78	77	74	66	77	71	1.09	1	0
Tb11.v5.0834	hypothetical protein, conserved	2.21	1118	882	1029	179	185	158	506	399	466	81	84	71	17	16	15	13	14	14	0.97	1	0
Tb11.v5.0835	kinesin, putative	2.08	2010	1502	1957	391	386	379	966	722	941	188	186	182	32	30	31	31	32	35	1.02	1	0
Tb11.v5.0836	metal-ion transporter, putative	2.78	2265	1681	2094	450	383	371	815	605	753	162	138	133	27	25	25	27	24	26	0.91	1	0
Tb11.v5.0837	importin beta-1 subunit, putative	2	5768	4416	5630	880	823	773	2884	2208	2815	440	412	387	95	91	92	72	71	75	0.86	1	0
Tb11.v5.0838	leucine-rich repeat protein (LRRP), putative	13.24	33574	23966	31150	4871	4644	4041	2536	1810	2353	368	351	305	83	75	77	60	60	59	0.87	1	0
Tb11.v5.0839	retrotransposon hot spot (RHS) protein, putative	11	12671	10818	12717	1972	1947	1836	1152	983	1156	179	177	167	38	41	38	29	30	32	0.88	1	0
Tb11.v5.0840	variant surface glycoprotein (VSG, atypical), putative	3.34	12	11	8	2	6	1	4	3	2	1	2	0	0	0	0	0	0	0		0	0
Tb11.v5.0841	hypothetical protein, conserved	2.11	2484	1947	2145	388	377	359	1177	923	1017	184	179	170	39	38	33	30	31	33	0.97	1	0
Tb11.v5.0842	Vesicle coat protein involved in Golgi to plasma membrane transport, putative	2.18	3547	2754	3169	525	617	478	1627	1263	1454	241	283	219	53	52	48	40	49	42	1.1	1	0
Tb11.v5.0843	hypothetical protein, conserved	1.99	1942	1579	1849	344	290	321	976	793	929	173	146	161	32	33	30	28	25	31	0.85	1	0
Tb11.v5.0844	ATP-dependent DEAH-box RNA helicase, putative	3.69	853	607	737	150	123	142	231	164	200	41	33	38	8	7	7	7	6	7	0.8	0	0
Tb11.v5.0845	hypothetical protein, conserved	2.27	1841	1449	1794	339	379	321	811	638	790	149	167	141	27	26	26	24	29	27	1.14	1	0
Tb11.v5.0846	hypothetical protein, conserved	2.08	1530	1149	1446	294	276	283	736	552	695	141	133	136	24	23	23	23	23	26	0.98	1	0
Tb11.v5.0847	variant surface glycoprotein (VSG), putative		0	0	0	0	0	0							0	0	0	0	0	0		0	0
Tb11.v5.0848	gamma-tubulin complex subunit, putative	2.02	2889	2265	2784	496	475	447	1430	1121	1378	246	235	221	47	46	45	40	40	43	0.93	1	0
Tb11.v5.0849	kinesin motor domain containing protein, putative	3.33	3591	2742	3182	598	639	562	1078	823	956	180	192	169	35	34	31	30	33	33	1.06	1	0
Tb11.v5.0850	Trypanosomal VSG domain/Trypanosome variant surface glycoprotein C-terminal domain containing protein, putative		65	46	62	5	14	11							0	0	0	0	0	0	0	0	0
Tb11.v5.0851	ribonuclease HII, putative	2.26	2304	1951	2232	404	532	480	1019	863	988	179	235	212	33	36	32	29	40	41	1.29	1	0
Tb11.v5.0852	hypothetical protein, conserved	2	1619	1277	1445	294	286	235	810	639	723	147	143	118	27	26	24	24	25	23	1.02	1	0
Tb11.v5.0853	Vacuolar sorting protein 9 (VPS9) domain containing protein, putative	2.16	2114	1635	2095	349	369	311	979	757	970	162	171	144	32	31	32	27	29	28	0.97	1	0
Tb11.v5.0854	NLI interacting factor-like phosphatase, putative	3.36	7348	5212	6159	1184	992	845	2187	1551	1833	352	295	251	72	64	60	58	51	49	0.86	1	0
Tb11.v5.0855	hypothetical protein, conserved	49.11	619	513	719	149	128	115	13	10	15	3	3	2	0	0	0	0	1	0	2	0	0
Tb11.v5.0856	hypothetical protein, conserved	2.12	764	604	778	133	124	125	360	285	367	63	58	59	12	12	12	10	10	11	0.87	1	0
Tb11.v5.0857	variant surface glycoprotein (VSG), putative		0	0	0	0	0	0							0	0	0	0	0	0		0	0
Tb11.v5.0858	hypothetical protein, conserved	2.34	4618	3590	4566	751	848	712	1974	1534	1951	321	362	304	65	63	64	53	62	59	1.05	1	0
Tb11.v5.0859	N-myristoyl transferase, putative	2.25	2849	2227	2839	482	471	366	1266	990	1262	214	209	163	42	41	41	35	36	32	0.94	1	0
Tb11.v5.0860	endonuclease G, putative	2.19	1355	976	1240	268	228	197	619	446	566	122	104	90	20	18	19	20	18	17	0.9	1	0
Tb11.v5.0861	hypothetical protein, conserved	2.31	1927	1613	1914	368	369	323	834	698	829	159	160	140	27	29	27	26	28	27	1.04	1	0
Tb11.v5.0862	hypothetical protein, conserved	2.65	1885	1505	1905	303	281	254	711	568	719	114	106	96	23	23	24	19	18	19	0.82	1	0
Tb11.v5.0863	hypothetical protein, conserved	2.16	1632	1236	1541	257	228	244	756	572	713	119	106	113	25	24	23	20	18	22	0.82	1	0
Tb11.v5.0864	receptor-type adenylate cyclase GRESAG 4, putative	3.41	2138	1725	2046	306	410	352	627	506	600	90	120	103	21	21	20	15	21	20	1.17	1	0
Tb11.v5.0865	receptor-type adenylate cyclase GRESAG 4, putative	7.77	15301	12076	15527	2625	3246	2722	1969	1554	1998	338	418	350	65	64	66	56	72	68	1.17	1	0
Tb11.v5.0866	major vault protein, putative	3.88	6530	4829	6232	1042	1099	919	1683	1245	1606	269	283	237	55	51	53	44	49	46	1	1	0
Tb11.v5.0867	hypothetical protein, conserved	2.1	2575	1826	2132	417	458	366	1226	870	1015	199	218	174	40	36	33	33	38	34	1.13	1	0
Tb11.v5.0868	mitotubule-associated protein Gb4, putative	16.46	205974	152759	225166	26703	42385	34651	12514	9281	13680	1622	2575	2105	411	383	449	267	443	408	1.24	1	0
Tb11.v5.0869	cystathione gamma lyase, putative	2.33	644	440	485	72	69	70	276	189	208	31	30	30	9	8	7	5	5	6	0.77	0	0
Tb11.v5.0870	variant surface glycoprotein (VSG, atypical), putative	2.22	20	12	14	0	4	0	9	5	6	0	2	0	0	0	0	0	0	0		0	0
Tb11.v5.0871	eIF3H	2.67	4391	3355	4690	872	840	739	1645	1257	1757	327	315	277	54	52	58	54	54	54	0.96	1	0
Tb11.v5.0872	variant surface glycoprotein (VSG), putative		0	0	0	0	1	0							0	0	0	0	0	0		0	0
Tb11.v5.0873	variant surface glycoprotein (VSG), putative		2	2	1	0	0	1							0	0	0	0	0	0		0	0
Tb11.v5.0874	protein kinase, putative	2.05	740	607	741	134	132	123	361	296	361	65	64	60	12	12	12	11	11	12	0.92	1	0
Tb11.v5.0875	Same as Tb927.10.1490, MKT1L	2.1	7646	5651	6148	1104	1145	1030	3641	2691	2928	526	545	490	120	111	96	86	94	95	1.03	1	0
Tb11.v5.0876	hypothetical protein, conserved	1.97	899	712	762	185	144	122	456	361	387	94	73	62	15	15	13	15	13	12	0.9	1	0
Tb11.v5.0877	eIF3b	2.46	8385	6782	7891	1399	1266	1114	3409	2757	3208	569	515	453	112	114	105	94	89	88	0.89	1	0
Tb11.v5.0878	DNA polymerase kappa, putative	8.65	3990	2995	3815	546	548	446	461	346	441	63	63	52	15	14	14	10	11	10	0.88	1	0
Tb11.v5.0879	variant surface glycoprotein (VSG), putative		2	3	6	1	3	0							0	0	0	0	0	0		0	0
Tb11.v5.0880	UDP-Gal or UDP-GlcNAc-dependent glycosyltransferase, putative	2.94	6642	5148	6643	1119	1217	1057	2259	1751	2260	381	414	360	74	72	74	63	71	70	1.03	1	0
Tb11.v5.0881	antigenic protein, putative	14.15	911754	642069	1033674	104750	160240	130309	64435	45376	73051	7403	11324	9209	2115	1870	2398	1217	1950	1785	1.08	1	0
Tb11.v5.0882	hypothetical protein, conserved	2.6	1084	857	1085	236	201	194	417	330	417	91	77	75	14	14	14	15	13	15	0.87	1	0
Tb11.v5.0883	hypothetical protein, conserved	2.14	737	625	766	156	129	130	344	292	358	73	60	61	11	12	12	12	10	12	0.8	1	0
Tb11.v5.0884	hypothetical protein, conserved	2.12	2490	1835	2558	463	396	395	1175	866	1207	218	187	186	39	36	40	36	32	36	0.83	1	0
Tb11.v5.0885	amino acid transporter, putative	2.27	1259	999	1246	230	283	234	555	440	549	101	125	103	18	18	18	17	22	20	1.22	1	0
Tb11.v5.0886	hypothetical protein, conserved	2.57	3773	2862	4089	680	621	520	1468	1114	1591	265	242	202	48	46	52	44	42	39	0.87	1	0
Tb11.v5.0887	hypothetical protein, conserved	1.99	4216	3275	4503	863	813	720	2119	1646	2263	434	409	362	70	68	74	71	70	70	0.96	1	0
Tb11.v5.0888	hypothetical protein, conserved	1.94	2212	1642	1910	329	314	287	1140	846	985	170	162	148	37	35	32	28	28	29	0.92	1	0
Tb11.v5.0889	variant surface glycoprotein (VSG), putative		0	0	0	0	0	0							0	0	0	0	0	0		0	0
Tb11.v5.0890	hypothetical protein, conserved	2.57	1819	1396	1695	274	284	271	708	543	660	107	111	105	23	22	22	18	19	20	0.93	1	0
Tb11.v5.0891	variant surface glycoprotein (VSG)-related, putative	1.59	127	129	199	24	32	24	80	81	125	15	20	15	3	3	4	2	3	3	0.86	0	0
Tb11.v5.0892	hypothetical protein, conserved	2.13	4575	3532	4358	894	857	741	2148	1658	2046	420	402	348	71	68	67	69	69	67	1.01	1	0
Tb11.v5.0893	hypothetical protein, conserved	2.22	1568	1203	1304	321	293	277	706	542	587	145	132	125	23	22	19	24	23	24	1.05	1	0
Tb11.v5.0894	variant surface glycoprotein (VSG), putative		0	0	0	0	0	0							0	0	0	0	0	0		0	0
Tb11.v5.0895	hypothetical protein, conserved	2.09	3899	2974	3165	579	556	531	1866	1423	1514	277	266	254	61	59	50	46	46	49	0.95	1	0
Tb11.v5.0896	variant surface glycoprotein (VSG), putative		0	0	3	0	0	0							0	0	0	0	0	0		0	0
Tb11.v5.0897	hypothetical protein, conserved	2.11	2256	1746	2211	434	421	397	1069	827	1048	206	200	188	35	34	34	34	34	36	0.99	1	0
Tb11.v5.0898	variant surface glycoprotein (VSG), putative		2	1	1	0	0	2							0	0	0	0	0	0		0	0
Tb11.v5.0899	tRNA-dihydrouridine synthase 2, putative	2.21	462	378	480	73	69	57	209	171	217	33	31	26	7	7	7	5	5	5	0.77	0	0
Tb11.v5.0900	hypothetical protein, conserved	2.23	1626	1306	1408	305	287	238	729	586	631	137	129	107	24	24	21	23	22	21	0.98	1	0
Tb11.v5.0901	tubulin-tyrsoine ligase-like protein, putative	2.01	1168	950	1170	236	245	207	581	473	582	117	122	103	19	19	19	19	21	20	1.08	1	0
Tb11.v5.0902	hypothetical protein, conserved	2.09	2413	1887	2330	411	431	375	1155	903	1115	197	206	179	38	37	37	32	35	35	1	1	0
Tb11.v5.0903	S-adenosylmethionine decarboxylase proenzyme, putative	2.48	2221	1677	2149	375	331	323	896	676	867	151	133	130	29	28	28	25	23	25	0.85	1	0
Tb11.v5.0904	glutaredoxin-like protein, putative	1.52	1033	817	926	230	174	176	680	538	609	151	114	116	22	22	20	25	20	22	0.87	1	0
Tb11.v5.0905	hypothetical protein, conserved	2.2	1861	1553	1925	356	346	271	846	706	875	162	157	123	28	29	29	27	27	24	0.95	1	0
Tb11.v5.0906	variant surface glycoprotein (VSG, atypical), putative		2	0	3	3	0	1							0	0	0	0	0	0		0	0
Tb11.v5.0907	variant surface glycoprotein (VSG, atypical), putative		0	1	0	0	0	0							0	0	0	0	0	0		0	0
Tb11.v5.0908	variant surface glycoprotein (VSG, atypical), putative		0	0	0	0	0	0							0	0	0	0	0	0		0	0
Tb11.v5.0909	variant surface glycoprotein (VSG, atypical), putative		0	0	0	0	0	0							0	0	0	0	0	0		0	0
Tb11.v5.0910	variant surface glycoprotein (VSG, atypical), putative		0	0	0	0	0	0							0	0	0	0	0	0		0	0
Tb11.v5.0911	variant surface glycoprotein (VSG, atypical), putative		0	0	0	0	0	0							0	0	0	0	0	0		0	0
Tb11.v5.0912	variant surface glycoprotein (VSG, atypical), putative		1	0	2	0	1	0							0	0	0	0	0	0		0	0
Tb11.v5.0913	variant surface glycoprotein (VSG, atypical), putative		0	0	1	1	0	0							0	0	0	0	0	0		0	0
Tb11.v5.0914	variant surface glycoprotein (VSG, atypical), putative		0	0	0	1	0	0							0	0	0	0	0	0		0	0
Tb11.v5.0915	variant surface glycoprotein (VSG, atypical), putative		0	0	0	0	0	0							0	0	0	0	0	0		0	0
Tb11.v5.0916	variant surface glycoprotein (VSG, atypical), putative		0	0	2	0	0	0							0	0	0	0	0	0		0	0
Tb11.v5.0917	variant surface glycoprotein (VSG, atypical), putative		0	0	0	0	0	1							0	0	0	0	0	0		0	0
Tb11.v5.0918	variant surface glycoprotein (VSG, atypical), putative		1	0	3	0	0	0							0	0	0	0	0	0		0	0
Tb11.v5.0919	variant surface glycoprotein (VSG, atypical), putative		0	1	3	1	2	0							0	0	0	0	0	0		0	0
Tb11.v5.0920	variant surface glycoprotein (VSG, atypical), putative		0	0	2	0	1	0							0	0	0	0	0	0		0	0
Tb11.v5.0921	variant surface glycoprotein (VSG, atypical), putative		0	0	1	0	0	0							0	0	0	0	0	0		0	0
Tb11.v5.0922	UDP-Gal or UDP-GlcNAc-dependent glycosyltransferase, putative		0	0	1	0	0	0							0	0	0	0	0	0		0	0
Tb11.v5.0923	variant surface glycoprotein (VSG), putative		0	2	1	0	0	1							0	0	0	0	0	0		0	0
Tb11.v5.0924	variant surface glycoprotein (VSG, atypical), putative		0	1	7	0	1	0							0	0	0	0	0	0		0	0
Tb11.v5.0925	variant surface glycoprotein (VSG, atypical), putative		0	0	0	0	0	0							0	0	0	0	0	0		0	0
Tb11.v5.0926	variant surface glycoprotein (VSG, atypical), putative		0	3	4	0	3	0							0	0	0	0	0	0		0	0
Tb11.v5.0927	variant surface glycoprotein (VSG, atypical), putative	1	1	1	0	1	1	0	1	1	0	1	1	0	0	0	0	0	0	0		0	0
Tb11.v5.0928	variant surface glycoprotein (VSG), putative	1	3	6	9	1	0	0	3	6	9	1	0	0	0	0	0	0	0	0		0	0
Tb11.v5.0929	variant surface glycoprotein (VSG, atypical), putative	1	2	1	0	0	0	0	2	1	0	0	0	0	0	0	0	0	0	0		0	0
Tb11.v5.0930	variant surface glycoprotein (VSG), putative		0	0	0	0	0	0							0	0	0	0	0	0		0	0
Tb11.v5.0931	variant surface glycoprotein (VSG), putative		0	0	0	0	0	0							0	0	0	0	0	0		0	0
Tb11.v5.0932	variant surface glycoprotein (VSG), putative	2.24	57206	44555	58314	11325	3662	3250	25538	19891	26033	5056	1635	1451	838	820	855	831	282	281	0.33	1	4
Tb11.v5.0933	variant surface glycoprotein (VSG), putative		0	2	5	1	0	0							0	0	0	0	0	0		0	0
Tb11.v5.0934	variant surface glycoprotein (VSG), putative		0	2	0	0	0	1							0	0	0	0	0	0		0	0
Tb11.v5.0935	variant surface glycoprotein (VSG, atypical), putative		0	0	1	0	0	1							0	0	0	0	0	0		0	0
Tb11.v5.0936	variant surface glycoprotein (VSG, atypical), putative		0	0	0	0	0	0							0	0	0	0	0	0		0	0
Tb11.v5.0937	variant surface glycoprotein (VSG, atypical), putative		0	0	2	0	0	0							0	0	0	0	0	0		0	0
Tb11.v5.0938	variant surface glycoprotein (VSG, atypical), putative		1	0	0	0	0	0							0	0	0	0	0	0		0	0
Tb11.v5.0939	variant surface glycoprotein (VSG), putative		1	0	0	0	0	0							0	0	0	0	0	0		0	0
Tb11.v5.0940	hypothetical protein, conserved		0	0	0	0	0	1							0	0	0	0	0	0		0	0
Tb11.v5.0941	variant surface glycoprotein (VSG), putative		0	0	2	0	0	0							0	0	0	0	0	0		0	0
Tb11.v5.0942	variant surface glycoprotein (VSG), putative		1	0	0	0	0	0							0	0	0	0	0	0		0	0
Tb11.v5.0943	variant surface glycoprotein (VSG), putative		2	0	2	0	0	1							0	0	0	0	0	0		0	0
Tb11.v5.0944	variant surface glycoprotein (VSG), putative		0	0	0	0	0	0							0	0	0	0	0	0		0	0
Tb11.v5.0945	variant surface glycoprotein (VSG, atypical), putative		0	0	1	0	0	0							0	0	0	0	0	0		0	0
Tb11.v5.0946	variant surface glycoprotein (VSG), putative		0	0	0	0	0	0							0	0	0	0	0	0		0	0
Tb11.v5.0947	variant surface glycoprotein (VSG), putative		0	0	0	0	0	0							0	0	0	0	0	0		0	0
Tb11.v5.0948	variant surface glycoprotein (VSG, atypical), putative	11	20	12	23	1	5	2	2	1	2	0	0	0	0	0	0	0	0	0		0	0
Tb11.v5.0949	variant surface glycoprotein (VSG), putative		0	0	0	1	1	0							0	0	0	0	0	0		0	0
Tb11.v5.0950	variant surface glycoprotein (VSG, atypical), putative		0	0	0	0	0	0							0	0	0	0	0	0		0	0
Tb11.v5.0951	variant surface glycoprotein (VSG, atypical), putative		0	0	0	0	0	0							0	0	0	0	0	0		0	0
Tb11.v5.0952	variant surface glycoprotein (VSG, atypical), putative		57	34	65	7	7	7							0	0	0	0	0	0	0	0	0
Tb11.v5.0953	variant surface glycoprotein (VSG, atypical), putative		0	1	0	0	0	0							0	0	0	0	0	0		0	0
Tb11.v5.0954	variant surface glycoprotein (VSG), putative		0	0	0	0	0	0							0	0	0	0	0	0		0	0
Tb11.v5.0955	variant surface glycoprotein (VSG, atypical), putative		1	0	2	0	2	0							0	0	0	0	0	0		0	0
Tb11.v5.0956	variant surface glycoprotein (VSG, atypical), putative		0	0	0	0	0	0							0	0	0	0	0	0		0	0
Tb11.v5.0957	variant surface glycoprotein (VSG), putative		0	0	0	0	0	0							0	0	0	0	0	0		0	0
Tb11.v5.0958	variant surface glycoprotein (VSG, atypical), putative	2.09	90	91	181	42	16	21	43	44	87	20	8	10	1	2	3	3	1	2	0.29	0	0
Tb11.v5.0959	hypothetical protein, conserved	2.09	3547	2837	3157	610	587	534	1697	1357	1511	292	281	256	56	56	50	48	48	50	0.97	1	0
Tb11.v5.0960	tRNA-dihydrouridine synthase 4, putative	2.03	1553	1189	1625	301	266	243	765	586	800	148	131	120	25	24	26	24	23	23	0.9	1	0
Tb11.v5.0961	hypothetical protein, conserved	2.01	1471	1130	1529	259	243	199	732	562	761	129	121	99	24	23	25	21	21	19	0.89	1	0
Tb11.v5.0962	hypothetical protein, conserved	2.15	1021	746	850	145	145	118	475	347	395	67	67	55	16	14	13	11	12	11	0.96	1	0
Tb11.v5.0963	Uncharacterised ACR, YggU family COG1872, putative	2.02	827	612	824	129	140	124	409	303	408	64	69	61	13	12	13	11	12	12	0.96	1	0
Tb11.v5.0964	hypothetical protein, conserved	2.06	1366	973	1077	190	176	169	663	472	523	92	85	82	22	19	17	15	15	16	0.91	1	0
Tb11.v5.0965	ATP-dependent DEAH-box RNA helicase, putative	2.13	6622	4815	5794	1163	981	945	3109	2261	2720	546	461	444	102	93	89	90	79	86	0.88	1	0
Tb11.v5.0966	hypothetical protein, conserved	2.05	1344	967	1065	222	201	192	656	472	520	108	98	94	22	19	17	18	17	18	0.94	1	0
Tb11.v5.0967	hypothetical protein, conserved	2.01	1904	1394	1702	311	340	274	947	694	847	155	169	136	31	29	28	25	29	26	1.07	1	0
Tb11.v5.0968	hypothetical protein, conserved	2	5782	4571	5485	1023	953	868	2891	2286	2743	512	477	434	95	94	90	84	82	84	0.94	1	0
Tb11.v5.0969	hypothetical protein, conserved	1.93	409	340	483	84	82	83	212	176	250	44	42	43	7	7	8	7	7	8	0.88	0	0
Tb11.v5.0970	chaperone protein DNAj, putative	1.99	1452	1155	1298	289	261	244	730	580	652	145	131	123	24	24	21	24	23	24	1	1	0
Tb11.v5.0971	mitochondrial DNA polymerase I protein A, putative	2.05	3864	2862	3227	667	635	521	1885	1396	1574	325	310	254	62	58	52	53	53	49	1	1	0
Tb11.v5.0972	hypothetical protein, conserved	1.98	1238	937	1218	237	209	204	625	473	615	120	106	103	21	19	20	20	18	20	0.88	1	0
Tb11.v5.0973	variant surface glycoprotein (VSG), putative		0	0	0	0	0	0							0	0	0	0	0	0		0	0
Tb11.v5.0974	variant surface glycoprotein (VSG), putative		3	0	0	0	0	0							0	0	0	0	0	0		0	0
Tb11.v5.0975	UDP-Gal or UDP-GlcNAc-dependent glycosyltransferase, putative		0	0	1	0	0	0							0	0	0	0	0	0		0	0
Tb11.v5.0976	variant surface glycoprotein (VSG), putative		1	0	0	0	0	0							0	0	0	0	0	0		0	0
Tb11.v5.0977	variant surface glycoprotein (VSG), putative		2	1	2	0	0	0							0	0	0	0	0	0		0	0
Tb11.v5.0978	variant surface glycoprotein (VSG), putative		0	0	0	0	0	0							0	0	0	0	0	0		0	0
Tb11.v5.0979	variant surface glycoprotein (VSG, atypical), putative		0	0	0	0	0	0							0	0	0	0	0	0		0	0
Tb11.v5.0980	variant surface glycoprotein (VSG, atypical), putative		1	1	2	0	0	0							0	0	0	0	0	0		0	0
Tb11.v5.0981	variant surface glycoprotein (VSG), putative		1	0	0	0	0	0							0	0	0	0	0	0		0	0
Tb11.v5.0982	hypothetical protein, conserved		0	0	0	0	0	0							0	0	0	0	0	0		0	0
Tb11.v5.0983	hypothetical protein, conserved		0	0	0	0	0	0							0	0	0	0	0	0		0	0
Tb11.v5.0984	hypothetical protein, conserved	2.45	2487	1997	2323	464	552	489	1015	815	948	189	225	200	33	34	31	31	39	39	1.24	1	0
Tb11.v5.0985	variant surface glycoprotein (VSG)-related, putative	2.04	1811	1510	1842	296	337	332	888	740	903	145	165	163	29	31	30	24	28	32	1.02	1	0
Tb11.v5.0986	sugar transporter, putative		0	0	0	0	0	0							0	0	0	0	0	0		0	0
Tb11.v5.0987	hypothetical protein, conserved		2	0	0	2	0	0							0	0	0	0	0	0		0	0
Tb11.v5.0988	hypothetical protein, conserved		0	0	0	0	0	1							0	0	0	0	0	0		0	0
Tb11.v5.0989	hypothetical protein, conserved		1	0	2	1	0	1							0	0	0	0	0	0		0	0
Tb11.v5.0990	hypothetical protein, conserved		0	0	0	0	0	0							0	0	0	0	0	0		0	0
Tb11.v5.0991	protein phosphatase 2C, putative	1.95	1361	1116	1516	209	273	229	698	572	777	107	140	117	23	24	26	18	24	23	1.07	1	0
Tb11.v5.0992	hypothetical protein, conserved		0	0	1	0	0	0							0	0	0	0	0	0		0	0
Tb11.v5.0993	hypothetical protein, conserved		0	0	1	0	0	0							0	0	0	0	0	0		0	0
Tb11.v5.0994	hypothetical protein, conserved		0	0	0	0	0	0							0	0	0	0	0	0		0	0
Tb11.v5.0995	hypothetical protein, conserved	2.93	3356	2715	3478	526	546	559	1145	927	1187	180	186	191	38	38	39	30	32	37	0.91	1	0
Tb11.v5.0996	hypothetical protein, conserved	3.09	9152	7410	8402	1530	1383	1208	2962	2398	2719	495	448	391	97	99	89	81	77	76	0.9	1	0
Tb11.v5.0997	hypothetical protein, conserved	3.12	3249	2403	2709	528	464	453	1041	770	868	169	149	145	34	32	28	28	26	28	0.91	1	0
Tb11.v5.0998	methionine aminopeptidase, putative	3.13	2402	1855	2267	478	420	334	767	593	724	153	134	107	25	24	24	25	23	21	0.92	1	0
Tb11.v5.0999	Domain of Unknown Function (DUF1042), putative	3.05	4617	3628	4488	880	794	746	1514	1190	1471	289	260	245	50	49	48	48	45	47	0.93	1	0
Tb11.v5.1000	hypothetical protein, conserved		0	0	0	0	0	0							0	0	0	0	0	0		0	0
Tb11.v5.1001	hypothetical protein, conserved		0	0	0	0	0	0							0	0	0	0	0	0		0	0
Tb11.v5.1002	hypothetical protein, conserved		0	0	0	0	0	0							0	0	0	0	0	0		0	0
Tb11.v5.1003	hypothetical protein, conserved		0	0	0	0	0	0							0	0	0	0	0	0		0	0
Tb11.v5.1004	hypothetical protein, conserved		0	0	0	0	0	0							0	0	0	0	0	0		0	0
Tb11.v5.1005	hypothetical protein, conserved		0	0	0	0	0	0							0	0	0	0	0	0		0	0
Tb11.v5.1006	hypothetical protein, conserved		0	0	0	0	0	0							0	0	0	0	0	0		0	0
Tb11.v5.1007	hypothetical protein, conserved		1	0	0	0	0	0							0	0	0	0	0	0		0	0
Tb11.v5.1008	variant surface glycoprotein (VSG), putative	11.79	74	43	88	11	9	10	6	4	7	1	1	1	0	0	0	0	0	0	0	0	0
Tb11.v5.1009	variant surface glycoprotein (VSG), putative		0	0	0	0	0	0							0	0	0	0	0	0		0	0
Tb11.v5.1010	variant surface glycoprotein (VSG), putative	3.47	4236	3018	3854	806	936	769	1221	870	1111	232	270	222	40	36	36	38	47	43	1.25	1	0
Tb11.v5.1011	calpain-like cysteine peptidase, putative	1.82	19834	13740	18065	2881	3744	3061	10898	7549	9926	1583	2057	1682	358	311	326	260	354	326	1.21	1	0
Tb11.v5.1012	2-oxoisovalerate dehydrogenase beta subunit, mitochondrial precursor, putative	3.52	886	711	893	173	166	145	252	202	254	49	47	41	8	8	8	8	8	8	0.94	0	0
Tb11.v5.1013	Protein prenyltransferase alpha subunit repeat, putative	2.27	2419	1867	2105	345	394	335	1066	822	927	152	174	148	35	34	30	25	30	29	1.07	1	0
Tb11.v5.1014	hypothetical protein, conserved	1.9	1064	777	1075	168	194	158	560	409	566	88	102	83	18	17	19	14	18	16	1.06	1	0
Tb11.v5.1015	expression site-associated gene 4 (ESAG4) protein, putative	2.72	2914	2201	2831	469	471	484	1071	809	1041	172	173	178	35	33	34	28	30	34	0.95	1	0
Tb11.v5.1016	receptor-type adenylate cyclase GRESAG 4 (pseudogene), putative	2.66	3506	2654	3258	655	598	613	1318	998	1225	246	225	230	43	41	40	40	39	45	0.96	1	0
Tb11.v5.1017	variant surface glycoprotein (VSG), putative		0	0	0	0	0	0							0	0	0	0	0	0		0	0
Tb11.v5.1018	variant surface glycoprotein (VSG), putative		0	2	1	0	0	0							0	0	0	0	0	0		0	0
Tb11.v5.1019	variant surface glycoprotein (VSG), putative	1	1	2	3	0	0	0	1	2	3	0	0	0	0	0	0	0	0	0		0	0
Tb11.v5.1020	retrotransposon hot spot (RHS) protein, putative	21.03	31688	26851	32344	5998	5565	5133	1507	1277	1538	285	265	244	49	53	50	47	46	47	0.94	1	0
Tb11.v5.1021	variant surface glycoprotein (VSG), putative	2.22	2928	2206	2539	445	486	403	1319	994	1144	200	219	182	43	41	38	33	38	35	1.06	1	0
Tb11.v5.1022	protein kinase, putative	2.01	3993	2820	3553	641	629	586	1987	1403	1768	319	313	292	65	58	58	52	54	57	0.97	1	0
Tb11.v5.1023	variant surface glycoprotein (VSG), putative	1.17	4	1	6	1	2	0	3	1	5	1	2	0	0	0	0	0	0	0		0	0
Tb11.v5.1024	variant surface glycoprotein (VSG, atypical), putative	1.06	192	159	240	59	63	38	181	150	226	56	59	36	6	6	7	9	10	7	1.18	0	0
Tb11.v5.1025	variant surface glycoprotein (VSG), putative		0	0	0	0	0	0							0	0	0	0	0	0		0	0
Tb11.v5.1026	procyclin-associated gene 2-like protein, putative	2	4220	4014	5502	1060	1260	1085	2110	2007	2751	530	630	543	69	83	90	87	109	105	1.22	1	0
Tb11.v5.1027	procyclin-associated gene 2-like protein, putative	2.25	1839	1982	2436	403	475	423	817	881	1083	179	211	188	27	36	36	29	36	36	1.09	1	0
Tb11.v5.1028	variant surface glycoprotein (VSG), putative		0	0	0	0	0	0							0	0	0	0	0	0		0	0
Tb11.v5.1029	variant surface glycoprotein (VSG), putative	63.5	299	209	322	48	27	23	5	3	5	1	0	0	0	0	0	0	0	0	0	0	0
Tb11.v5.1030	hypothetical protein, conserved	51.06	1894	1398	2134	304	271	249	37	27	42	6	5	5	1	1	1	1	1	1	0.67	0	0
Tb11.v5.1031	hypothetical protein, conserved	76.66	860	697	1006	177	135	121	11	9	13	2	2	2	0	0	0	0	0	0	0	0	0
Tb11.v5.1032	variant surface glycoprotein (VSG), putative		0	0	1	0	0	0							0	0	0	0	0	0		0	0
Tb11.v5.1033	variant surface glycoprotein (VSG), putative		2	2	2	0	1	0							0	0	0	0	0	0		0	0
Tb11.v5.1034	heat shock protein 70 (hsp70), putative	3.11	37876	30117	65271	14847	14579	12745	12179	9684	20987	4774	4688	4098	400	399	689	785	807	794	1.09	1	0
Tb11.v5.1035	heat shock protein 70, major HSP70	2.32	114122	92457	206543	46737	46275	40348	49191	39852	89027	20145	19946	17391	1615	1643	2922	3312	3435	3370	1.1	1	0
Tb11.v5.1036	gamma-tubulin complex subunit, putative	1.78	1059	854	1213	185	195	163	595	480	681	104	110	92	20	20	22	17	19	18	0.95	1	0
Tb11.v5.1037	variant surface glycoprotein (VSG), putative		1	2	3	0	0	0							0	0	0	0	0	0		0	0
Tb11.v5.1038	calpain-like cysteine peptidase, putative	28.72	318415	227234	337060	50404	71434	59694	11087	7912	11736	1755	2487	2078	364	326	385	289	428	403	1.27	1	0
Tb11.v5.1039	CBP110 nuclear cap binding complex subunit	2.18	10073	7830	11012	1843	1914	1720	4621	3592	5051	845	878	789	152	148	166	139	151	153	0.99	1	0
Tb11.v5.1040	mismatch repair protein, putative	2.97	1235	941	942	234	178	202	416	317	317	79	60	68	14	13	10	13	10	13	0.83	1	0
Tb11.v5.1041	hypothetical protein, conserved	2.16	2432	1877	2355	386	369	381	1126	869	1090	179	171	176	37	36	36	29	29	34	0.88	1	0
Tb11.v5.1042	RNA-editing complex protein, putative	2.45	1354	1034	1310	204	186	168	553	422	535	83	76	69	18	17	18	14	13	13	0.79	1	0
Tb11.v5.1043	nucleobase/nucleoside transporter 8.1, putative	11.09	6295	4832	5504	1112	1001	883	568	436	496	100	90	80	19	18	16	16	16	16	0.97	1	0
Tb11.v5.1044	nucleobase/nucleoside transporter 8.1, putative	10.7	6295	4832	5504	1112	1001	883	588	452	514	104	94	83	19	19	17	17	16	16	0.91	1	0
Tb11.v5.1045	protein kinase, putative	2.31	1616	1089	1522	293	282	263	700	471	659	127	122	114	23	19	22	21	21	22	0.95	1	0
Tb11.v5.1046	elongation factor 1-alpha, putative	3.44	212071	177896	218720	56485	43471	41034	61649	51714	63581	16420	12637	11928	2024	2131	2087	2699	2176	2312	0.91	1	0
Tb11.v5.1047	variant surface glycoprotein (VSG, atypical), putative		3	0	6	0	0	0							0	0	0	0	0	0		0	0
Tb11.v5.1048	protein kinase, putative	3.18	1834	1451	1724	302	349	284	577	456	542	95	110	89	19	19	18	16	19	17	1.09	1	0
Tb11.v5.1049	nucleobase/nucleoside transporter 8.1, putative	12.29	5561	4240	4927	977	889	773	452	345	401	79	72	63	15	14	13	13	12	12	0.89	1	0
Tb11.v5.1050	DNA polymerase kappa, putative	14.85	7364	6015	7585	1180	1179	1003	496	405	511	79	79	68	16	17	17	13	14	13	0.9	1	0
Tb11.v5.1051	nucleobase/nucleoside transporter 8.1, putative	6.56	5561	4240	4927	978	890	775	848	646	751	149	136	118	28	27	25	24	23	23	0.92	1	0
Tb11.v5.1052	nucleobase/nucleoside transporter 8.1, putative	5.55	4470	3485	3777	767	694	617	805	628	681	138	125	111	26	26	22	23	22	22	0.96	1	0
Tb11.v5.1053	DIS3-like exonuclease, putative	2.17	1841	1408	1776	294	283	246	848	649	818	135	130	113	28	27	27	22	22	22	0.88	1	0
Tb11.v5.1054	nucleobase/nucleoside transporter 8.1, putative	8.05	2549	1886	2317	483	429	361	317	234	288	60	53	45	10	10	9	10	9	9	0.9	0	0
Tb11.v5.1055	Paraflagellar rod protein 73kDa	5.9	68300	59024	73574	16242	13335	12259	11576	10004	12470	2753	2260	2078	380	412	409	453	389	403	0.9	1	0
Tb11.v5.1056	DNA polymerase kappa, putative	16.44	3925	3029	3961	639	624	572	239	184	241	39	38	35	8	8	8	6	7	7	0.93	0	0
Tb11.v5.1057	protein kinase, putative	2.07	3721	2910	3213	543	534	505	1798	1406	1552	262	258	244	59	58	51	43	44	47	0.93	1	0
Tb11.v5.1058	DNA polymerase kappa, putative	13	8102	6460	8093	1283	1308	1089	623	497	623	99	101	84	20	20	20	16	17	16	0.92	1	0
Tb11.v5.1059	40S ribosomal protein S4	3.08	22316	18058	24063	4838	4106	3667	7245	5863	7813	1571	1333	1191	238	242	256	258	230	231	0.89	1	0
Tb11.v5.1060	40S ribosomal protein S18, putative	6.52	12194	10012	13798	3018	2422	2278	1870	1536	2116	463	371	349	61	63	69	76	64	68	0.88	1	0
Tb11.v5.1061	hypothetical protein, conserved	3.17	1383	1253	1485	268	287	222	436	395	468	85	91	70	14	16	15	14	16	14	1.07	1	0
Tb11.v5.1062	chaperone protein DNAj, putative	2.06	3113	2765	3196	630	618	607	1511	1342	1551	306	300	295	50	55	51	50	52	57	1.02	1	0
Tb11.v5.1063	hypothetical protein, conserved	3.21	5890	5639	7614	1645	1644	1476	1835	1757	2372	512	512	460	60	72	78	84	88	89	1.08	1	0
Tb11.v5.1064	hypothetical protein, conserved		0	0	0	0	0	0							0	0	0	0	0	0		0	0
Tb927.1.05	variant surface glycoprotein (VSG), putative		0	1	0	0	2	0							0	0	0	0	0	0		0	0
Tb927.1.10	hypothetical protein	4.88	12	23	28	2	4	2	2	5	6	0	1	0	0	0	0	0	0	0		0	0
Tb927.1.100	RNA polymerase (pseudogene), putative	8.21	71620	54252	68292	10226	9566	8614	8724	6608	8318	1246	1165	1049	286	272	273	205	201	203	0.84	1	0
Tb927.1.1000	developmentally regulated phosphoprotein (dr6)	1	1335	966	1104	192	190	184	1335	966	1104	192	190	184	44	40	36	32	33	36	0.96	1	0
Tb927.1.1010	E3 ubiquitin-protein ligase KCMF1, putative	1.53	2717	1966	2814	469	505	403	1776	1285	1839	307	330	263	58	53	60	50	57	51	1.03	1	0
Tb927.1.1020	leucine-rich repeat-containing protein	2.19	1840	1444	1752	335	347	294	840	659	800	153	158	134	28	27	26	25	27	26	1.04	1	0
Tb927.1.1030	NOP49	1.93	2495	1789	2050	355	386	335	1293	927	1062	184	200	174	42	38	35	30	34	34	1.03	1	0
Tb927.1.1040	hypothetical protein, conserved	5.15	927	683	780	182	146	134	180	133	151	35	28	26	6	5	5	6	5	5	0.83	0	0
Tb927.1.1050	Metallo-dependent phosphatase-like domain-containing protein	1.48	5076	4049	5284	934	1052	897	3430	2736	3570	631	711	606	113	113	117	104	122	117	1.1	1	0
Tb927.1.1060	Cell cycle checkpoint protein RAD1-like, putative	1.75	1259	1040	1321	234	223	195	719	594	755	134	127	111	24	24	25	22	22	22	0.92	1	0
Tb927.1.1070	hypothetical protein, unlikely	3.64	395	305	402	73	79	55	109	84	110	20	22	15	4	3	4	3	4	3	1	0	0
Tb927.1.1080	TFIIH basal transcription factor subunit (TSP1)	1.2	1767	1347	1606	289	325	273	1473	1123	1338	241	271	228	48	46	44	40	47	44	1.11	1	0
Tb927.1.1090	hypothetical protein, unlikely	1.97	865	703	891	158	170	163	439	357	452	80	86	83	14	15	15	13	15	16	1.03	1	0
Tb927.1.110	hypothetical protein, conserved	6.83	19494	18043	21243	3885	3487	3015	2854	2642	3110	569	511	441	94	109	102	94	88	85	0.89	1	0
Tb927.1.1100	BBP109	1.16	4055	3278	3705	792	680	593	3496	2826	3194	683	586	511	115	116	105	112	101	99	0.93	1	0
Tb927.1.1110	hypothetical protein, unlikely	2.17	252	202	256	34	46	41	116	93	118	16	21	19	4	4	4	3	4	4	1	0	0
Tb927.1.1120	Ribosomal RNA-processing protein 8, putative (RRP8)	1.85	1757	1260	1505	268	253	244	950	681	814	145	137	132	31	28	27	24	24	26	0.92	1	0
Tb927.1.1130	glycerol-3-phosphate dehydrogenase (FAD-dependent), in TAO complex	2.13	2447	1863	2658	487	466	477	1149	875	1248	229	219	224	38	36	41	38	38	43	0.95	1	0
Tb927.1.1140	Transmembrane protein 231, putative	1.96	1186	860	963	212	147	173	605	439	491	108	75	88	20	18	16	18	13	17	0.74	1	0
Tb927.1.1150	zeta tubulin	1.58	1545	1303	1601	263	302	241	978	825	1013	166	191	153	32	34	33	27	33	30	1.08	1	0
Tb927.1.1160	PPR3	1.19	1787	1351	1606	336	284	258	1502	1135	1350	282	239	217	49	47	44	46	41	42	0.9	1	0
Tb927.1.1170	RBP12 DNA-directed RNA polymerase I subunit	1	505	432	522	125	90	86	505	432	522	125	90	86	17	18	17	21	16	17	0.82	1	0
Tb927.1.1180	hypothetical protein, unlikely	1	431	342	462	69	49	60	431	342	462	69	49	60	14	14	15	11	8	12	0.59	1	3
Tb927.1.120	retrotransposon hot spot protein 4 (RHS4), putative	3.31	123300	101760	119268	20781	19223	17065	37251	30743	36033	6278	5808	5156	1223	1267	1183	1032	1000	999	0.9	1	0
Tb927.1.1200	Mitchondrial SSU ribosomal protein	1.99	1819	1388	1695	308	274	231	914	697	852	155	138	116	30	29	28	25	24	22	0.89	1	0
Tb927.1.1210	conserved protein, unknown function	2.01	901	743	895	172	156	132	448	370	445	86	78	66	15	15	15	14	13	13	0.87	1	0
Tb927.1.1220	RWD domain-containing protein	1	1433	1291	1493	265	243	216	1433	1291	1493	265	243	216	47	53	49	44	42	42	0.89	1	0
Tb927.1.1230	chaperone DNAj, putative, J47	1.06	1050	899	1142	208	179	165	991	848	1077	196	169	156	33	35	35	32	29	30	0.85	1	0
Tb927.1.1240	CTP synthase	2	5683	4508	5058	976	851	695	2842	2254	2529	488	426	348	93	93	83	80	73	67	0.89	1	0
Tb927.1.1250	hypothetical protein, unlikely	1.7	653	537	655	109	78	68	384	316	385	64	46	40	13	13	13	11	8	8	0.64	1	3
Tb927.1.1260	hypothetical protein, unlikely	1.96	1163	966	1061	109	106	95	593	493	541	56	54	48	19	20	18	9	9	9	0.64	1	3
Tb927.1.1270	homocysteine S-methyltransferase, putative	2	1311	1130	1631	265	324	292	656	565	816	133	162	146	22	23	27	22	28	28	1.12	1	0
Tb927.1.1280	hypothetical protein, unlikely	2.03	476	327	556	48	95	66	234	161	274	24	47	33	8	7	9	4	8	6	1.14	0	0
Tb927.1.1290	hypothetical protein, unlikely	2.18	479	338	579	57	92	77	220	155	266	26	42	35	7	6	9	4	7	7	1	0	0
Tb927.1.1300	hypothetical transmembrane protein, conserved	1.97	797	644	856	131	118	108	405	327	435	66	60	55	13	13	14	11	10	11	0.77	1	0
Tb927.1.1310	transmembrane protein, conserved	2.04	1860	1354	1687	293	316	293	912	664	827	144	155	144	30	27	27	24	27	28	1.04	1	0
Tb927.1.1320	hypothetical protein, unlikely	2.76	409	317	384	73	97	44	148	115	139	26	35	16	5	5	5	4	6	3	1.2	0	0
Tb927.1.1330	Mitochondrial Editosome-like Complex TUTase (MEAT1)	1.89	1487	1218	1570	251	269	283	787	644	831	133	142	150	26	27	27	22	24	29	0.96	1	0
Tb927.1.1340	FG-GAP repeat protein, putative,intergrin alpha chain protein, putative	1.34	2843	2226	2859	520	538	489	2122	1661	2134	388	401	365	70	68	70	64	69	71	1.02	1	0
Tb927.1.1350	kinesin heavy chain, Kinesin-1	1.07	3413	2657	3369	623	531	529	3190	2483	3149	582	496	494	105	102	103	96	85	96	0.85	1	0
Tb927.1.1360	hypothetical protein, unlikely	2.04	425	276	355	43	47	41	208	135	174	21	23	20	7	6	6	3	4	4	0.8	0	0
Tb927.1.1370	rRNA biogenesis protein, putative	2.04	3175	2565	3247	624	499	399	1556	1257	1592	306	245	196	51	52	52	50	42	38	0.82	1	0
Tb927.1.1380	serine/threonine protein phosphatase 2A regulatory subunit, putative	1.58	2626	1983	2613	463	432	412	1662	1255	1654	293	273	261	55	52	54	48	47	51	0.91	1	0
Tb927.1.1390	hypothetical protein, conserved	1.98	818	645	729	114	108	106	413	326	368	58	55	54	14	13	12	10	9	10	0.78	1	0
Tb927.1.1400	Overproducer of inositol protein 10 homolog, putative	1.96	706	520	764	113	143	112	360	265	390	58	73	57	12	11	13	10	13	11	1.08	1	0
Tb927.1.1410	hypothetical protein, unlikely	1	1190	1099	1336	175	149	136	1190	1099	1336	175	149	136	39	45	44	29	26	26	0.7	1	0
Tb927.1.1420	conserved protein, unknown function	1	4993	4055	4330	887	796	680	4993	4055	4330	887	796	680	164	167	142	146	137	132	0.95	1	0
Tb927.1.1430	hypothetical protein, unlikely	1.1	844	629	725	95	109	71	767	572	659	86	99	65	25	24	22	14	17	13	0.92	1	0
Tb927.1.1440	hypothetical protein, unlikely	1.92	768	616	656	97	91	62	400	321	342	51	47	32	13	13	11	8	8	6	0.8	1	0
Tb927.1.1450	hypothetical protein, unlikely	2.12	306	234	254	41	31	32	144	110	120	19	15	15	5	5	4	3	3	3	0.75	0	0
Tb927.1.1460	hypothetical protein, unlikely	1.54	158	112	129	20	20	23	103	73	84	13	13	15	3	3	3	2	2	3	0.67	0	0
Tb927.1.1470	conserved protein, unknown function	2.12	1307	969	1164	250	233	205	617	457	549	118	110	97	20	19	18	19	19	19	1	1	0
Tb927.1.1480	hypothetical protein, unlikely	2.89	204	156	178	27	19	19	71	54	62	9	7	7	2	2	2	1	1	1	0.5	0	0
Tb927.1.1490	hypothetical protein, unlikely	2.67	269	154	219	35	20	37	101	58	82	13	7	14	3	2	3	2	1	3	0.33	0	0
Tb927.1.1500	conserved protein, unknown function	1.62	8335	5638	5551	949	1194	893	5145	3480	3427	586	737	551	169	143	112	96	127	107	1.22	1	0
Tb927.1.1510	hypothetical protein, unlikely	1	1228	770	829	94	128	91	1228	770	829	94	128	91	40	32	27	15	22	18	1.02	1	0
Tb927.1.1520	hypothetical protein, unlikely	1.02	646	452	410	68	72	38	633	443	402	67	71	37	21	18	13	11	12	7	0.96	1	0
Tb927.1.1530	protein kinase, putative	1.25	9714	7224	8904	1600	1577	1347	7771	5779	7123	1280	1262	1078	255	238	234	210	217	209	0.98	1	0
Tb927.1.1540	Tubulin/FtsZ family, putative	1	2127	1608	2006	370	360	313	2127	1608	2006	370	360	313	70	66	66	61	62	61	0.97	1	0
Tb927.1.1550	tubulin-tyrosine ligase, putative	1	3282	2650	3253	542	553	494	3282	2650	3253	542	553	494	108	109	107	89	95	96	0.96	1	0
Tb927.1.1560	vesicular-fusion protein nsf, putative,N-ethylmaleimide sensitive factor (NsF)	1.99	5164	3949	5016	747	791	670	2595	1984	2521	375	397	337	85	82	83	62	68	65	0.93	1	0
Tb927.1.1570	hypothetical protein, unlikely	2.32	402	241	307	41	52	38	173	104	132	18	22	16	6	4	4	3	4	3	1	0	0
Tb927.1.1580	cytochrome c oxidase assembly factor, SCO1/2, putative	1.04	856	689	830	133	146	120	823	663	798	128	140	115	27	27	26	21	24	22	1	1	0
Tb927.1.1590	hypothetical protein, unlikely	1	299	230	327	26	35	34	299	230	327	26	35	34	10	9	11	4	6	7	0.75	1	0
Tb927.1.1600	pseudouridine synthase TruD, putative	1.32	5937	4619	5279	991	881	816	4498	3499	3999	751	667	618	148	144	131	123	115	120	0.9	1	0
Tb927.1.1610	hypothetical protein, conserved	2	1301	1030	1217	236	195	208	651	515	609	118	98	104	21	21	20	19	17	20	0.85	1	0
Tb927.1.1620	ATP-dependent DEAD/H RNA helicase, putative, no clear yeast homologue	1.4	4502	3551	4689	836	719	643	3216	2536	3349	597	514	459	106	105	110	98	89	89	0.85	1	0
Tb927.1.1630	transcription elongation factor 1 homolog (ELOF1)	2.09	801	576	782	116	128	117	383	276	374	56	61	56	13	11	12	9	11	11	1	1	0
Tb927.1.1640	hypothetical protein, conserved	1.95	1514	1196	1427	251	241	193	776	613	732	129	124	99	25	25	24	21	21	19	0.91	1	0
Tb927.1.1650	hypothetical protein, conserved	3.31	930	681	781	182	146	134	281	206	236	55	44	40	9	8	8	9	8	8	0.89	0	0
Tb927.1.1660	ESCO acetyltransferase domain-containing protein	2.26	673	563	715	142	151	115	298	249	316	63	67	51	10	10	10	10	12	10	1.14	1	0
Tb927.1.1670	ARM-like helical domain-containing protein	1.54	7312	5685	8072	1457	1402	1260	4748	3692	5242	946	910	818	156	152	172	156	157	159	0.95	1	0
Tb927.1.1680	Transcription elongation factor 1 domain-containing protein	1	869	632	854	137	154	114	869	632	854	137	154	114	29	26	28	23	27	22	1.04	1	0
Tb927.1.1690	RNA editing endoribonuclease (KREN1)	1	2837	2240	2884	511	481	452	2837	2240	2884	511	481	452	93	92	95	84	83	88	0.92	1	0
Tb927.1.1700	AATF protein, putative	1	2045	1780	2212	441	333	286	2045	1780	2212	441	333	286	67	73	73	73	57	55	0.78	1	0
Tb927.1.1710	transmembrane protein, conserved	1	11797	9660	13036	2528	2528	2241	11797	9660	13036	2528	2528	2241	387	398	428	416	435	434	1.03	1	0
Tb927.1.1720	cyclophilin 15, putative	1	1159	972	1091	197	193	223	1159	972	1091	197	193	223	38	40	36	32	33	43	0.96	1	0
Tb927.1.1730	conserved protein, unknown function	1	4207	3306	3928	783	730	703	4207	3306	3928	783	730	703	138	136	129	129	126	136	0.97	1	0
Tb927.1.1740	Clathrin-associated protein	18.55	1476733	1024807	1219804	237996	317982	262601	79608	55246	65758	12830	17142	14156	2613	2277	2159	2109	2952	2743	1.38	1	0
Tb927.1.1750	conserved protein, unknown function	1	1422	1065	1330	264	251	212	1422	1065	1330	264	251	212	47	44	44	43	43	41	0.98	1	0
Tb927.1.1760	hypothetical transmembrane protein	1	504	362	471	42	52	54	504	362	471	42	52	54	17	15	15	7	9	10	0.78	1	0
Tb927.1.1770	glutaredoxin GRX2	1	715	506	746	70	97	84	715	506	746	70	97	84	23	21	24	12	17	16	0.92	1	0
Tb927.1.1780	hypothetical protein, unlikely	1.02	348	267	440	64	68	67	341	262	431	63	67	66	11	11	14	10	12	13	0.96	1	0
Tb927.1.1790	hypothetical PIN domain-containing protein, conserved	1	1088	838	993	151	163	166	1088	838	993	151	163	166	36	35	33	25	28	32	0.95	1	0
Tb927.1.180	retrotransposon hot spot protein 1 (RHS1), putative	9.83	96040	77064	91290	14246	14102	12531	9770	7840	9287	1449	1435	1275	321	323	305	238	247	247	0.91	1	0
Tb927.1.1800	hypothetical protein, unlikely	1	692	461	526	94	100	94	692	461	526	94	100	94	23	19	17	15	17	18	1.03	1	0
Tb927.1.1810	hypothetical protein, unlikely	1	288	198	270	41	37	29	288	198	270	41	37	29	9	8	9	7	6	6	0.71	0	0
Tb927.1.1820	hypothetical PIN domain-containing protein	1	3163	2501	2721	498	450	381	3163	2501	2721	498	450	381	104	103	89	82	78	74	0.91	1	0
Tb927.1.1830	hypothetical protein, unlikely	1	584	438	561	67	73	57	584	438	561	67	73	57	19	18	18	11	13	11	0.87	1	0
Tb927.1.1840	conserved protein, unknown function	1	1878	1398	1720	345	331	305	1878	1398	1720	345	331	305	62	58	56	57	57	59	1	1	0
Tb927.1.1850	hypothetical protein, conserved	1	1670	1185	1369	272	268	233	1670	1185	1369	272	268	233	55	49	45	45	46	45	1.01	1	0
Tb927.1.1860	hypothetical protein, unlikely	1	407	263	318	45	49	30	407	263	318	45	49	30	13	11	10	7	8	6	0.89	1	0
Tb927.1.1870	hypothetical protein, unlikely	1	88	56	53	15	13	5	88	56	53	15	13	5	3	2	2	2	2	1	0.8	0	0
Tb927.1.1880	WD40 repeat-containing protein	1	8509	6210	7256	1496	1316	1267	8509	6210	7256	1496	1316	1267	279	256	238	246	227	246	0.94	1	0
Tb927.1.1890	RCCP Replication Factor C Subunit 1-related protein	1	4746	3650	4519	861	803	737	4746	3650	4519	861	803	737	156	150	148	142	138	143	0.95	1	0
Tb927.1.190	retrotransposon hot spot protein (RHS, pseudogene)	7.59	75732	62845	73166	12574	12164	11087	9978	8280	9640	1657	1603	1461	328	341	316	272	276	283	0.94	1	0
Tb927.1.1900	hypothetical protein, unlikely	1	313	215	266	43	49	57	313	215	266	43	49	57	10	9	9	7	8	11	0.94	1	0
Tb927.1.1910	MORN repeat-containing protein	1	4797	3685	4823	867	885	781	4797	3685	4823	867	885	781	157	152	158	143	152	151	1.01	1	0
Tb927.1.1920	conserved protein, unknown function	1	1583	1350	1656	328	342	253	1583	1350	1656	328	342	253	52	56	54	54	59	49	1.08	1	0
Tb927.1.1930	TOR4 protein kinase = TOR-like 2	1	21356	15334	17405	3453	3602	3169	21356	15334	17405	3453	3602	3169	701	632	571	568	620	614	1.09	1	0
Tb927.1.1940	hypothetical protein, unlikely	1	1513	884	1121	120	143	119	1513	884	1121	120	143	119	50	36	37	20	25	23	0.86	1	0
Tb927.1.1950	hypothetical protein, unlikely	1	903	505	657	68	85	69	903	505	657	68	85	69	30	21	22	11	15	13	0.88	1	0
Tb927.1.1960	chaperone DNAj, putative, J16	1	4650	3773	4380	844	757	674	4650	3773	4380	844	757	674	153	156	144	139	130	131	0.92	1	0
Tb927.1.1970	hypothetical protein, unlikely	1	315	279	346	53	34	31	315	279	346	53	34	31	10	11	11	9	6	6	0.57	1	3
Tb927.1.1980	Protein transport protein yif1, putative	1	2037	1670	1993	343	358	342	2037	1670	1993	343	358	342	67	69	65	56	62	66	1.02	1	0
Tb927.1.1990	Pre-mRNA-splicing factor 38, putative	1	728	625	814	151	129	135	728	625	814	151	129	135	24	26	27	25	22	26	0.83	1	0
Tb927.1.20	ESAG3 pseudogene	3.81	19850	21297	29869	3890	5672	4672	5210	5590	7840	1021	1489	1226	171	230	257	168	256	238	1.2	1	0
Tb927.1.200	hypothetical protein, unlikely	68.04	3524	2926	3733	377	467	381	52	43	55	6	7	6	2	2	2	1	1	1	0.5	0	0
Tb927.1.2000	hypothetical protein, unlikely	1	144	141	176	26	29	12	144	141	176	26	29	12	5	6	6	4	5	2	0.91	0	0
Tb927.1.2010	hypothetical protein, unlikely	1	107	73	83	14	12	17	107	73	83	14	12	17	4	3	3	2	2	3	0.67	0	0
Tb927.1.2020	hypothetical protein	1.16	175	157	200	30	31	19	151	135	172	26	27	16	5	6	6	4	5	3	0.91	0	0
Tb927.1.2030	hypothetical protein, unlikely	1.51	196	158	264	20	30	33	130	105	175	13	20	22	4	4	6	2	3	4	0.67	0	0
Tb927.1.2040	ESAG2, putative	6.81	6828	6049	9504	1380	2201	1673	1003	888	1396	203	323	246	33	37	46	33	56	48	1.4	1	0
Tb927.1.2050	hypothetical protein, unlikely	1.02	128	123	238	32	35	20	125	121	233	31	34	20	4	5	8	5	6	4	0.86	0	0
Tb927.1.2060	ESAG11 pseudogene	1.22	197	166	254	23	38	32	161	136	208	19	31	26	5	6	7	3	5	5	0.91	0	0
Tb927.1.2070	ESAG11 pseudogene	1.17	67	63	92	12	10	12	57	54	79	10	9	10	2	2	3	2	2	2	0.67	0	0
Tb927.1.2080	hypothetical protein, unlikely	1	61	27	42	8	8	8	61	27	42	8	8	8	2	1	1	1	1	2	0.67	0	0
Tb927.1.2090	hypothetical protein, unlikely	1	213	152	164	16	19	24	213	152	164	16	19	24	7	6	5	3	3	5	0.67	0	0
Tb927.1.2100	calpain-like cysteine peptidase, putative,cysteine peptidase, Clan CA, family C2, putative	1.93	28596	28870	38335	10423	13589	12330	14817	14959	19863	5401	7041	6389	486	617	652	888	1213	1238	1.57	1	2
Tb927.1.2110	calpain-like cysteine peptidase, putative,cysteine peptidase, Clan CA, family C2, putative	1	2065	1600	2175	401	376	331	2065	1600	2175	401	376	331	68	66	71	66	65	64	0.94	1	0
Tb927.1.2120	calpain, putative,cysteine peptidase, Clan CA, family C2, putative	1	6302	4821	6006	1127	1065	926	6302	4821	6006	1127	1065	926	207	199	197	185	183	179	0.96	1	0
Tb927.1.2130	hypothetical protein, unlikely	1	814	587	757	112	133	112	814	587	757	112	133	112	27	24	25	18	23	22	1.05	1	0
Tb927.1.2140	hypothetical protein, unlikely	1	409	297	457	35	50	30	409	297	457	35	50	30	13	12	15	6	9	6	0.82	1	0
Tb927.1.2150	calpain-like protein fragment, putative,calpain-like cysteine peptidase, Clan CA, family C2	1	336	302	339	56	58	40	336	302	339	56	58	40	11	12	11	9	10	8	0.95	1	0
Tb927.1.2160	calpain-like protein fragment, putative	1	493	318	417	69	59	59	493	318	417	69	59	59	16	13	14	11	10	11	0.77	1	0
Tb927.1.2170	hypothetical protein, unlikely	1	197	173	203	20	26	13	197	173	203	20	26	13	6	7	7	3	4	3	0.73	0	0
Tb927.1.2180	hypothetical protein, unlikely	1	1549	1181	1473	178	199	203	1549	1181	1473	178	199	203	51	49	48	29	34	39	0.87	1	0
Tb927.1.2190	RAPTOR-like (TOR complexes)	1	13172	10019	12110	2297	2302	1955	13172	10019	12110	2297	2302	1955	432	413	398	378	396	379	1.02	1	0
Tb927.1.220	retrotransposon hot spot protein 1 (RHS1), putative	9.21	95931	76688	91016	14201	14077	12496	10416	8327	9882	1542	1528	1357	342	343	324	254	263	263	0.91	1	0
Tb927.1.2200	ZC3H4	1	773	612	694	81	87	62	773	612	694	81	87	62	25	25	23	13	15	12	0.81	1	0
Tb927.1.2210	nucleosome assembly protein (NAP), putative	1	2826	2486	3127	487	487	390	2826	2486	3127	487	487	390	93	102	103	80	84	76	0.91	1	0
Tb927.1.2220	hypothetical protein, unlikely	1	657	525	708	76	74	67	657	525	708	76	74	67	22	22	23	12	13	13	0.72	1	0
Tb927.1.2230	calpain-like protein fragment, putative	1.55	3923	3446	4185	659	734	627	2531	2223	2700	425	474	405	83	92	89	70	82	78	1.03	1	0
Tb927.1.2240	hypothetical protein, unlikely	1	1808	1152	1373	139	164	162	1808	1152	1373	139	164	162	59	47	45	23	28	31	0.81	1	0
Tb927.1.2250	hypothetical protein, unlikely	1	244	174	235	30	28	31	244	174	235	30	28	31	8	7	8	5	5	6	0.71	0	0
Tb927.1.2260	calpain-like protein fragment, putative	1.46	4294	3592	4322	659	668	618	2941	2460	2960	451	458	423	97	101	97	74	79	82	0.92	1	0
Tb927.1.2270	hypothetical protein, unlikely	1	550	446	719	100	63	70	550	446	719	100	63	70	18	18	24	16	11	14	0.54	1	3
Tb927.1.2280	hypothetical protein, unlikely	1	1062	896	1113	145	134	111	1062	896	1113	145	134	111	35	37	37	24	23	22	0.74	1	0
Tb927.1.2290	hypothetical protein, unlikely	1	1597	1235	1578	209	182	165	1597	1235	1578	209	182	165	52	51	52	34	31	32	0.71	1	0
Tb927.1.230	hypothetical protein, unlikely	9.74	5979	4399	5754	599	667	588	614	452	591	61	68	60	20	19	19	10	12	12	0.8	1	0
Tb927.1.2300	hypothetical protein, unlikely	1	1991	1530	1832	226	219	199	1991	1530	1832	226	219	199	65	63	60	37	38	39	0.78	1	0
Tb927.1.2310	hypothetical protein	1	1762	1375	1583	187	175	179	1762	1375	1583	187	175	179	58	57	52	31	30	35	0.71	1	0
Tb927.1.2320	hypothetical protein, conserved	1	1051	784	1023	194	169	151	1051	784	1023	194	169	151	34	32	34	32	29	29	0.87	1	0
Tb927.1.2330	beta tubulin	5.55	342564	304008	387709	95144	66235	60480	61723	54776	69857	17143	11934	10897	2026	2258	2293	2818	2055	2112	0.8	1	0
Tb927.1.2340	alpha tubulin	4.88	339978	300068	389396	96121	67038	62199	69668	61489	79794	19697	13737	12746	2287	2534	2619	3238	2366	2470	0.81	1	0
Tb927.1.2350	beta tubulin	6.45	342514	303969	387666	95135	66232	60472	53103	47127	60103	14750	10269	9376	1743	1942	1973	2425	1769	1817	0.8	1	0
Tb927.1.2360	alpha tubulin	4.89	339978	300068	389396	96121	67038	62199	69525	61364	79631	19657	13709	12720	2282	2529	2614	3232	2361	2465	0.81	1	0
Tb927.1.2370	beta tubulin	5.12	342587	304024	387724	95153	66239	60484	66912	59380	75727	18585	12937	11813	2196	2447	2486	3055	2228	2289	0.8	1	0
Tb927.1.2380	alpha tubulin	4.88	339978	300068	389396	96121	67038	62199	69668	61489	79794	19697	13737	12746	2287	2534	2619	3238	2366	2470	0.81	1	0
Tb927.1.2390	beta tubulin	5.55	342565	304008	387709	95144	66235	60480	61723	54776	69857	17143	11934	10897	2026	2258	2293	2818	2055	2112	0.8	1	0
Tb927.1.240	retrotransposon hot spot protein (RHS, pseudogene), putative	11.01	114199	90614	107505	19443	18385	16865	10372	8230	9764	1766	1670	1532	340	339	321	290	288	297	0.94	1	0
Tb927.1.2400	alpha tubulin	5.6	339894	300002	389333	96111	67026	62185	60695	53572	69524	17163	11969	11104	1992	2208	2282	2822	2061	2152	0.81	1	0
Tb927.1.2410	beta tubulin, pseudogene	6.67	212398	191516	239241	61557	42010	38748	31844	28713	35868	9229	6298	5809	1045	1183	1177	1517	1085	1126	0.81	1	0
Tb927.1.2420	hypothetical protein	1	364	273	369	77	60	67	364	273	369	77	60	67	12	11	12	13	10	13	0.77	1	0
Tb927.1.2430	histone H3	6.49	67595	58450	76236	17358	14979	13393	10415	9006	11747	2675	2308	2064	342	371	386	440	398	400	0.96	1	0
Tb927.1.2440	hypothetical protein, unlikely	6.8	35142	30080	41997	8241	7205	6630	5168	4424	6176	1212	1060	975	170	182	203	199	183	189	0.91	1	0
Tb927.1.2450	histone H3	6.56	67595	58450	76236	17358	14979	13393	10304	8910	11621	2646	2283	2042	338	367	381	435	393	396	0.96	1	0
Tb927.1.2460	hypothetical protein, unlikely	6.62	35142	30080	41997	8241	7205	6630	5308	4544	6344	1245	1088	1002	174	187	208	205	187	194	0.9	1	0
Tb927.1.2470	histone H3	7.26	67581	58435	76218	17356	14977	13393	9309	8049	10498	2391	2063	1845	306	332	345	393	355	358	0.96	1	0
Tb927.1.2480	hypothetical protein, unlikely	8.05	35137	30078	41991	8240	7202	6630	4365	3736	5216	1024	895	824	143	154	171	168	154	160	0.91	1	0
Tb927.1.2490	histone H3	8.93	67575	58414	76205	17351	14974	13389	7567	6541	8534	1943	1677	1499	248	270	280	319	289	291	0.96	1	0
Tb927.1.250	hypothetical protein, unlikely	16.54	1855	1394	1634	371	267	297	112	84	99	22	16	18	4	3	3	4	3	3	0.75	0	0
Tb927.1.2500	hypothetical protein, unlikely	6.71	35133	30075	41989	8240	7205	6628	5236	4482	6258	1228	1074	988	172	185	205	202	185	191	0.91	1	0
Tb927.1.2510	histone H3	6.5	67595	58450	76236	17358	14979	13393	10399	8992	11729	2670	2304	2060	341	371	385	439	397	399	0.96	1	0
Tb927.1.2520	hypothetical protein, unlikely	6.62	35133	30075	41989	8240	7205	6628	5307	4543	6343	1245	1088	1001	174	187	208	205	187	194	0.9	1	0
Tb927.1.2530	histone H3	7.38	67564	58416	76193	17350	14969	13383	9155	7915	10324	2351	2028	1813	301	326	339	387	349	351	0.96	1	0
Tb927.1.2540	hypothetical protein, unlikely	6.78	35142	30080	41997	8241	7205	6630	5183	4437	6194	1215	1063	978	170	183	203	200	183	190	0.91	1	0
Tb927.1.2550	histone H3	6.5	67595	58450	76236	17358	14979	13393	10399	8992	11729	2670	2304	2060	341	371	385	439	397	399	0.96	1	0
Tb927.1.2560	hypothetical protein, unlikely	7.72	35137	30078	41991	8240	7202	6630	4551	3896	5439	1067	933	859	149	161	179	175	161	166	0.91	1	0
Tb927.1.2570	coatomer beta subunit (beta-coP)	1	12465	10043	12372	2191	2016	1909	12465	10043	12372	2191	2016	1909	409	414	406	360	347	370	0.9	1	0
Tb927.1.2580	EAP1 exosome complex PH subunit	1	2496	2174	2597	532	460	382	2496	2174	2597	532	460	382	82	90	85	87	79	74	0.91	1	0
Tb927.1.2590	hypothetical protein, unlikely	1	653	490	562	88	68	70	653	490	562	88	68	70	21	20	18	14	12	14	0.73	1	0
Tb927.1.260	hypothetical protein, unlikely	7.53	6731	5581	7763	1222	1119	1041	894	741	1031	162	149	138	29	31	34	27	26	27	0.84	1	0
Tb927.1.2600	PUF9	1	7246	5581	6257	1324	1065	949	7246	5581	6257	1324	1065	949	238	230	205	218	183	184	0.86	1	0
Tb927.1.2610	hypothetical protein, unlikely	1	176	138	127	21	23	14	176	138	127	21	23	14	6	6	4	3	4	3	1	0	0
Tb927.1.2620	hypothetical protein, unlikely	1	628	473	519	45	48	37	628	473	519	45	48	37	21	19	17	7	8	7	0.64	1	3
Tb927.1.2630	hypothetical protein, unlikely	1	448	344	454	50	44	33	448	344	454	50	44	33	15	14	15	8	8	6	0.67	1	0
Tb927.1.2640	hypothetical protein, conserved	1	1688	1214	1382	216	201	171	1688	1214	1382	216	201	171	55	50	45	36	35	33	0.85	1	0
Tb927.1.2650	hypothetical protein, unlikely	1	325	226	245	25	20	26	325	226	245	25	20	26	11	9	8	4	3	5	0.46	1	4
Tb927.1.2660	hypothetical protein, unlikely	1	21	11	21	2	1	2	21	11	21	2	1	2	1	0	1	0	0	0		0	0
Tb927.1.2670	flagellar protein PF16	1	8354	6692	7990	1328	1178	1038	8354	6692	7990	1328	1178	1038	274	276	262	218	203	201	0.84	1	0
Tb927.1.2680	hypothetical protein, unlikely	1	1136	860	1079	100	82	77	1136	860	1079	100	82	77	37	35	35	16	14	15	0.54	1	3
Tb927.1.2690	hypothetical protein, unlikely	1	1293	1073	1051	164	140	117	1293	1073	1051	164	140	117	42	44	35	27	24	23	0.76	1	0
Tb927.1.270	hypothetical protein	11.33	8390	6278	8292	1304	1211	1085	741	554	732	115	107	96	24	23	24	19	18	19	0.82	1	0
Tb927.1.2700	hypothetical protein, conserved	1	1615	1309	1722	280	304	228	1615	1309	1722	280	304	228	53	54	57	46	52	44	1	1	0
Tb927.1.2710	hypothetical protein, conserved	1	2664	2025	2396	486	464	411	2664	2025	2396	486	464	411	87	83	79	80	80	80	1	1	0
Tb927.1.2720	hypothetical protein, unlikely	1	516	361	411	55	55	55	516	361	411	55	55	55	17	15	13	9	9	11	0.78	1	0
Tb927.1.2730	hypothetical protein, conserved	1	1550	1221	1464	281	238	232	1550	1221	1464	281	238	232	51	50	48	46	41	45	0.86	1	0
Tb927.1.2740	lipase-like protein, putative	1	2015	1558	1912	356	353	307	2015	1558	1912	356	353	307	66	64	63	59	61	59	0.99	1	0
Tb927.1.275	ESAG4 pseudogene	10.28	23734	17576	22631	3915	3618	3350	2309	1710	2201	381	352	326	76	70	72	63	61	63	0.9	1	0
Tb927.1.2750	hypothetical protein, conserved	1	2182	1985	2436	497	423	418	2182	1985	2436	497	423	418	72	82	80	82	73	81	0.9	1	0
Tb927.1.2760	hypothetical protein	1	812	667	755	137	144	117	812	667	755	137	144	117	27	27	25	23	25	23	1.02	1	0
Tb927.1.2770	hypothetical protein, conserved	1	1527	1157	1257	265	257	230	1527	1157	1257	265	257	230	50	48	41	44	44	45	1.02	1	0
Tb927.1.2780	hypothetical protein	1.48	284	214	267	49	42	33	192	145	180	33	28	22	6	6	6	5	5	4	0.83	0	0
Tb927.1.280	Protein of unknown function (DUF1181), putative	29.45	3652	2708	4499	600	568	510	124	92	153	20	19	17	4	4	5	3	3	3	0.67	0	0
Tb927.1.2810	hypothetical protein, unlikely	2.99	564	452	692	98	86	83	189	151	231	33	29	28	6	6	8	5	5	5	0.71	0	0
Tb927.1.2820	pteridine transporter, putative	2.66	4074	2968	4114	859	714	624	1532	1116	1547	323	268	235	50	46	51	53	46	46	0.88	1	0
Tb927.1.2830	hypothetical protein, unlikely	2.64	448	371	491	62	67	61	170	141	186	23	25	23	6	6	6	4	4	4	0.73	0	0
Tb927.1.2840	hypothetical protein, unlikely	2.84	564	452	692	98	86	83	199	159	244	35	30	29	7	7	8	6	5	6	0.67	0	0
Tb927.1.2850	pteridine transporter, putative	3.77	4058	2957	4106	857	703	623	1076	784	1089	227	186	165	35	32	36	37	32	32	0.86	1	0
Tb927.1.2860	hypothetical protein, unlikely	2.25	448	371	491	62	67	61	199	165	218	28	30	27	7	7	7	5	5	5	0.77	0	0
Tb927.1.2870	hypothetical protein, unlikely	3.26	564	452	692	98	86	83	173	139	212	30	26	25	6	6	7	5	4	5	0.62	0	0
Tb927.1.2880	pteridine transporter, putative	2.77	4078	2970	4125	860	716	626	1472	1072	1489	310	258	226	48	44	49	51	44	44	0.87	1	0
Tb927.1.2890	hypothetical protein, unlikely	5.7	447	371	491	62	67	61	78	65	86	11	12	11	3	3	3	2	2	2	0.67	0	0
Tb927.1.290	leucine-rich repeat protein (LRRP)	11.29	70719	51179	65479	10458	9946	8808	6264	4533	5800	926	881	780	206	187	190	152	152	151	0.89	1	0
Tb927.1.2900	hypothetical protein, unlikely	1	241	189	247	43	41	31	241	189	247	43	41	31	8	8	8	7	7	6	0.88	0	0
Tb927.1.2910	hypothetical protein, unlikely	1	164	134	174	36	32	30	164	134	174	36	32	30	5	6	6	6	6	6	0.92	0	0
Tb927.1.2920	hypothetical protein, unlikely	1	151	166	168	22	34	26	151	166	168	22	34	26	5	7	6	4	6	5	1.09	0	0
Tb927.1.2930	hypothetical protein, unlikely	1	283	245	275	64	36	50	283	245	275	64	36	50	9	10	9	11	6	10	0.57	1	3
Tb927.1.2940	hypothetical protein, unlikely	1	110	86	86	25	11	16	110	86	86	25	11	16	4	4	3	4	2	3	0.5	0	0
Tb927.1.2950	hypothetical protein, unlikely	1	63	46	66	23	11	15	63	46	66	23	11	15	2	2	2	4	2	3	0.57	0	0
Tb927.1.2960	hypothetical protein, unlikely	1	77	46	82	15	10	13	77	46	82	15	10	13	3	2	3	2	2	3	0.67	0	0
Tb927.1.2970	hypothetical protein, conserved	1.04	1460	1027	1219	222	202	196	1404	988	1172	213	194	188	46	41	38	35	33	36	0.89	1	0
Tb927.1.2980	hypothetical protein, conserved	1.05	5526	4243	5110	870	918	789	5263	4041	4867	829	874	751	173	167	160	136	151	146	1.02	1	0
Tb927.1.2985	ER protein Pkr1, putative	1	830	709	815	185	195	145	830	709	815	185	195	145	27	29	27	30	34	28	1.17	1	0
Tb927.1.2990	PPR2	1	6374	5158	5960	1135	1078	1005	6374	5158	5960	1135	1078	1005	209	213	196	187	186	195	0.97	1	0
Tb927.1.30	hypothetical protein		5	2	0	0	0	0							0	0	0	0	0	0		0	0
Tb927.1.300	retrotransposon hot spot protein (RHS, pseudogene), putative	12.08	35914	28006	34535	6499	5964	5451	2973	2318	2859	538	494	451	98	96	94	88	85	87	0.93	1	0
Tb927.1.3000	amidohydrolase, putative	1	2540	1963	2361	508	441	448	2540	1963	2361	508	441	448	83	81	78	84	76	87	0.93	1	0
Tb927.1.3010	TbPAMC4, RNA editing	1	1331	1131	1462	262	255	241	1331	1131	1462	262	255	241	44	47	48	43	44	47	0.96	1	0
Tb927.1.3020	hypothetical protein, unlikely	1	303	222	282	66	65	45	303	222	282	66	65	45	10	9	9	11	11	9	1.05	1	0
Tb927.1.3030	KREL2	1	3524	2784	3607	627	594	500	3524	2784	3607	627	594	500	116	115	118	103	102	97	0.92	1	0
Tb927.1.3040	hypothetical protein, conserved	1	1185	974	1271	277	226	199	1185	974	1271	277	226	199	39	40	42	46	39	39	0.88	1	0
Tb927.1.3050	tRNA (Uracil-5-)-methyltransferase, putative	1	4128	3127	3708	720	608	515	4128	3127	3708	720	608	515	136	129	122	118	105	100	0.87	1	0
Tb927.1.3060	hypothetical protein, unlikely	1	146	133	129	22	31	29	146	133	129	22	31	29	5	5	4	4	5	6	1.11	0	0
Tb927.1.3070	hypothetical protein, conserved, poly(Q), poly(H)	1	3798	3026	3146	680	662	542	3798	3026	3146	680	662	542	125	125	103	112	114	105	1.06	1	0
Tb927.1.3080	hypothetical protein, unlikely	1	1142	786	929	97	91	98	1142	786	929	97	91	98	37	32	30	16	16	19	0.68	1	0
Tb927.1.3090	hypothetical protein, unlikely	1	426	349	467	75	67	51	426	349	467	75	67	51	14	14	15	12	12	10	0.86	1	0
Tb927.1.310	hypothetical protein, unlikely	2.4	414	314	430	48	43	38	173	131	179	20	18	16	6	5	6	3	3	3	0.6	0	0
Tb927.1.3100	hypothetical protein, unlikely	1	661	442	554	89	75	88	661	442	554	89	75	88	22	18	18	15	13	17	0.76	1	0
Tb927.1.3110	soluble N-ethylmaleimide sensitive factor (NSF) attachment protein, putative	1	2380	1838	2263	469	482	399	2380	1838	2263	469	482	399	78	76	74	77	83	77	1.09	1	0
Tb927.1.3120	separase, putative,cysteine peptidase, Clan CD, family C50, putative	1.75	5098	3932	5014	964	932	851	2913	2247	2865	551	533	486	96	93	94	91	92	94	0.99	1	0
Tb927.1.3130	AGC/RSK family serine/threonine kinase, putative	1	2312	1720	2069	438	405	401	2312	1720	2069	438	405	401	76	71	68	72	70	78	0.99	1	0
Tb927.1.3140	hypothetical protein, unlikely	1	349	264	309	57	47	36	349	264	309	57	47	36	11	11	10	9	8	7	0.8	1	0
Tb927.1.3150	hypothetical protein, conserved	1	2000	1631	1792	367	336	259	2000	1631	1792	367	336	259	66	67	59	60	58	50	0.97	1	0
Tb927.1.3160	hypothetical protein, unlikely	1	83	63	69	19	9	11	83	63	69	19	9	11	3	3	2	3	2	2	0.67	0	0
Tb927.1.3170	CHORD domain - Zn binding domain	1	2147	1638	1809	312	318	251	2147	1638	1809	312	318	251	70	68	59	51	55	49	0.99	1	0
Tb927.1.3180	40S ribosomal protein S11	1.81	14871	12248	14976	3780	3129	2751	8216	6767	8274	2088	1729	1520	270	279	272	343	298	295	0.97	1	0
Tb927.1.3190	hypothetical protein, unlikely	1	1251	870	1443	201	225	149	1251	870	1443	201	225	149	41	36	47	33	39	29	0.96	1	0
Tb927.1.320	retrotransposon hot spot protein (RHS, pseudogene), putative	6.62	15124	13121	15116	2931	2840	2504	2285	1982	2283	443	429	378	75	82	75	73	74	73	0.99	1	0
Tb927.1.3200	SGT1-like protein, cold-shock domain	1	2739	2134	3762	693	844	705	2739	2134	3762	693	844	705	90	88	123	114	145	137	1.22	1	0
Tb927.1.3210	hypothetical protein, unlikely	1	953	732	1396	211	257	208	953	732	1396	211	257	208	31	30	46	35	44	40	1.07	1	0
Tb927.1.3220	TBC-M likely GAP	1	2227	1695	2023	384	355	310	2227	1695	2023	384	355	310	73	70	66	63	61	60	0.94	1	0
Tb927.1.3230	cell division cycle protein, putative	1	3256	2666	3456	651	624	546	3256	2666	3456	651	624	546	107	110	113	107	107	106	0.97	1	0
Tb927.1.3240	hypothetical protein, unlikely	1	224	183	278	49	44	45	224	183	278	49	44	45	7	8	9	8	8	9	0.89	0	0
Tb927.1.3250	hypothetical protein, myosin heavy-chain like	1	11814	9085	10308	2013	1892	1658	11814	9085	10308	2013	1892	1658	388	374	338	331	326	321	0.97	1	0
Tb927.1.3260	hypothetical protein, conserved	1	14779	11274	13451	2704	2652	2332	14779	11274	13451	2704	2652	2332	485	465	442	445	457	452	1.03	1	0
Tb927.1.3270	hypothetical protein, conserved	1	5268	4034	5040	984	928	803	5268	4034	5040	984	928	803	173	166	165	162	160	156	0.98	1	0
Tb927.1.3280	septum formation protein MAF homologue, putative	1	1133	873	1190	216	203	174	1133	873	1190	216	203	174	37	36	39	36	35	34	0.92	1	0
Tb927.1.3290	hypothetical protein, conserved	1	5836	4195	4764	971	784	712	5836	4195	4764	971	784	712	192	173	156	160	135	138	0.85	1	0
Tb927.1.330	retrotransposon hot spot protein (RHS, pseudogene), putative	38.36	17394	14896	17052	3214	3124	2717	453	388	445	84	81	71	15	16	15	14	14	14	0.93	1	0
Tb927.1.3300	myotubularin, putative,zinc-binding phosphatase, putative	1	4813	4023	4676	783	754	686	4813	4023	4676	783	754	686	158	166	153	129	130	133	0.92	1	0
Tb927.1.3310	hypothetical protein, conserved, no human or yeast homologue	1	2380	1930	2494	381	359	316	2380	1930	2494	381	359	316	78	80	82	63	62	61	0.85	1	0
Tb927.1.3320	leucine-rich repeat protein (LRRP)	1	648	508	714	117	115	96	648	508	714	117	115	96	21	21	23	19	20	19	0.93	1	0
Tb927.1.3330	hypothetical protein, unlikely	1	75	74	58	10	5	9	75	74	58	10	5	9	2	3	2	2	1	2	0.4	0	0
Tb927.1.3340	hypothetical protein, unlikely	1	65	52	58	13	12	5	65	52	58	13	12	5	2	2	2	2	2	1	0.8	0	0
Tb927.1.3350	hypothetical protein	1	118	122	187	40	30	21	118	122	187	40	30	21	4	5	6	7	5	4	0.71	0	0
Tb927.1.3360	hypothetical protein, unlikely	1	97	91	114	17	12	11	97	91	114	17	12	11	3	4	4	3	2	2	0.5	0	0
Tb927.1.3370	hypothetical protein, unlikely	1	226	179	279	40	34	24	226	179	279	40	34	24	7	7	9	7	6	5	0.71	0	0
Tb927.1.3380	hypothetical protein, unlikely	1	353	253	347	47	35	41	353	253	347	47	35	41	12	10	11	8	6	8	0.6	1	3
Tb927.1.3390	Eukaryotic protein of unknown function (DUF866), putative	1	1661	1315	2113	305	312	270	1661	1315	2113	305	312	270	55	54	69	50	54	52	0.9	1	0
Tb927.1.340	hypothetical protein, unlikely	1.75	594	479	597	76	73	56	339	274	341	43	42	32	11	11	11	7	7	6	0.74	1	0
Tb927.1.3400	hypothetical protein, conserved	1	1993	1633	1959	352	358	314	1993	1633	1959	352	358	314	65	67	64	58	62	61	1.01	1	0
Tb927.1.3410	hypothetical protein, conserved	1	1534	1306	1440	228	226	194	1534	1306	1440	228	226	194	50	54	47	37	39	38	0.92	1	0
Tb927.1.3420	hypothetical protein, unlikely	1.17	272	215	208	25	33	26	232	184	178	21	28	22	8	8	6	3	5	4	1	0	0
Tb927.1.3430	hypothetical protein, unlikely	1.97	609	412	511	51	60	52	309	209	259	26	30	26	10	9	9	4	5	5	0.71	0	0
Tb927.1.3440	hypothetical protein, unlikely	1.92	598	394	477	40	46	43	311	205	248	21	24	22	10	8	8	3	4	4	0.67	0	0
Tb927.1.3450	hypothetical protein, conserved	1.56	6668	5178	5802	1084	1050	916	4274	3319	3719	695	673	587	140	137	122	114	116	114	0.98	1	0
Tb927.1.3460	hypothetical protein, unlikely	1	386	304	392	31	42	24	386	304	392	31	42	24	13	13	13	5	7	5	0.74	1	0
Tb927.1.3470	hypothetical protein, unlikely	1	495	355	392	68	62	51	495	355	392	68	62	51	16	15	13	11	11	10	0.88	1	0
Tb927.1.3480	hypothetical protein, unlikely	1	524	415	454	58	64	70	524	415	454	58	64	70	17	17	15	10	11	14	0.85	1	0
Tb927.1.3490	hypothetical protein, unlikely	1	651	458	605	87	77	67	651	458	605	87	77	67	21	19	20	14	13	13	0.74	1	0
Tb927.1.350	retrotransposon hot spot protein (RHS, pseudogene), putative	8.12	14096	11307	14451	2391	2293	2049	1736	1392	1780	294	282	252	57	57	58	48	49	49	0.92	1	0
Tb927.1.3500	hypothetical protein, unlikely	1	215	191	255	25	24	32	215	191	255	25	24	32	7	8	8	4	4	6	0.62	0	0
Tb927.1.3510	hypothetical protein, unlikely	1	284	169	254	34	39	19	284	169	254	34	39	19	9	7	8	6	7	4	0.93	0	0
Tb927.1.3520	hypothetical protein, unlikely	1	440	277	381	47	47	46	440	277	381	47	47	46	14	11	13	8	8	9	0.73	1	0
Tb927.1.3530	hypothetical protein, unlikely	1	584	437	551	85	73	73	584	437	551	85	73	73	19	18	18	14	13	14	0.79	1	0
Tb927.1.3540	hypothetical protein, unlikely	1	511	429	520	82	92	80	511	429	520	82	92	80	17	18	17	13	16	16	1.03	1	0
Tb927.1.3550	hypothetical protein	1	1831	1420	1734	328	301	244	1831	1420	1734	328	301	244	60	59	57	54	52	47	0.93	1	0
Tb927.1.3560	MAP2 microtubulue associated protein	1	5391	4120	4844	821	791	713	5391	4120	4844	821	791	713	177	170	159	135	136	138	0.92	1	0
Tb927.1.3570	hypothetical protein, unlikely	1	192	159	164	23	23	21	192	159	164	23	23	21	6	7	5	4	4	4	0.8	0	0
Tb927.1.3580	hypothetical protein, unlikely	1	156	132	140	22	29	26	156	132	140	22	29	26	5	5	5	4	5	5	1	0	0
Tb927.1.3590	hypothetical protein, unlikely	1	80	70	59	16	12	8	80	70	59	16	12	8	3	3	2	3	2	2	0.67	0	0
Tb927.1.360	hypothetical protein, unlikely	20.72	10263	7881	9471	1153	1229	1132	495	380	457	56	59	55	16	16	15	9	10	11	0.8	1	0
Tb927.1.3600	hypothetical protein, unlikely	1	135	127	145	20	14	19	135	127	145	20	14	19	4	5	5	3	2	4	0.44	0	0
Tb927.1.3610	hypothetical protein	1	376	306	348	48	50	47	376	306	348	48	50	47	12	13	11	8	9	9	0.9	1	0
Tb927.1.3620	hypothetical protein, unlikely	1	242	149	222	38	35	20	242	149	222	38	35	20	8	6	7	6	6	4	0.86	0	0
Tb927.1.3630	hypothetical protein, unlikely	2.42	200	151	216	28	32	25	83	62	89	12	13	10	3	3	3	2	2	2	0.67	0	0
Tb927.1.3640	hypothetical protein, unlikely	1.42	216	205	267	47	39	34	152	144	188	33	27	24	5	6	6	5	5	5	0.83	0	0
Tb927.1.3650	hypothetical protein, unlikely	1.02	160	154	182	31	19	31	157	151	178	30	19	30	5	6	6	5	3	6	0.5	0	0
Tb927.1.3670	ESAG8, putative	1.36	2024	1624	2275	329	381	333	1488	1194	1673	242	280	245	49	49	55	40	48	47	1	1	0
Tb927.1.3680	hypothetical protein, unlikely	1	56	45	54	9	10	4	56	45	54	9	10	4	2	2	2	1	2	1	1	0	0
Tb927.1.370	leucine-rich repeat protein (LRRP)	5.52	66383	48005	61950	10037	9463	8383	12026	8697	11223	1818	1714	1519	395	358	368	299	295	294	0.88	1	0
Tb927.1.3700	hypothetical protein, unlikely	1.42	5	7	5	1	0	2	4	5	4	1	0	1	0	0	0	0	0	0		0	0
Tb927.1.3710	hypothetical protein, unlikely	142.88	409	367	28	3	17	15	3	3	0	0	0	0	0	0	0	0	0	0		0	0
Tb927.1.3720	hypothetical protein, unlikely	3.72	1614	1102	61	1	36	42	434	296	16	0	10	11	14	12	1	0	2	2	2	1	1
Tb927.1.3730	hypothetical protein	13.77	130946	100530	194966	21372	25171	19165	9510	7301	14159	1552	1828	1392	312	301	465	255	315	270	0.87	1	0
Tb927.1.3740	hypothetical protein, unlikely	83.94	579777	472584	860608	97580	100396	80516	6907	5630	10253	1162	1196	959	227	232	337	191	206	186	0.78	1	0
Tb927.1.3750	hypothetical protein, conserved	28.92	760	706	2567	60	81	57	26	24	89	2	3	2	1	1	3	0	1	0	0.5	0	0
Tb927.1.3760	hypothetical protein, conserved	24.21	2427	1829	2713	401	352	320	100	76	112	17	15	13	3	3	4	3	3	3	0.75	0	0
Tb927.1.3770	hypothetical protein, unlikely	1	3	2	4	1	3	3	3	2	4	1	3	3	0	0	0	0	1	1		0	0
Tb927.1.380	Protein of unknown function (DUF1181), putative	4	4135	3057	5163	682	662	597	1034	764	1291	171	166	149	34	31	42	28	29	29	0.82	1	0
Tb927.1.3800	POMP18	1	502	390	554	107	97	91	502	390	554	107	97	91	16	16	18	18	17	18	0.92	1	0
Tb927.1.3810	hypothetical protein, conserved	1	711	618	871	170	143	117	711	618	871	170	143	117	23	25	29	28	25	23	0.86	1	0
Tb927.1.3820	ATP synthase subunit, putative	1	1635	1352	1629	244	240	258	1635	1352	1629	244	240	258	54	56	53	40	41	50	0.87	1	0
Tb927.1.3830	glucose-6-phosphate isomerase, glycosomal (PGI)	1	20977	17736	23975	3484	3252	3289	20977	17736	23975	3484	3252	3289	689	731	787	573	560	637	0.82	1	0
Tb927.1.3840	hypothetical protein, conserved	1	2206	1722	2108	424	354	326	2206	1722	2108	424	354	326	72	71	69	70	61	63	0.87	1	0
Tb927.1.3850	Sec61 beta family and TM domain	1	2040	1812	2677	476	525	376	2040	1812	2677	476	525	376	67	75	88	78	90	73	1.08	1	0
Tb927.1.3860	hypothetical protein, conserved	1	4915	3840	5122	947	895	787	4915	3840	5122	947	895	787	161	158	168	156	154	153	0.95	1	0
Tb927.1.3870	hypothetical protein, unlikely	1	53	53	66	11	9	10	53	53	66	11	9	10	2	2	2	2	2	2	0.8	0	0
Tb927.1.3880	Fusaric acid resistance protein-like, putative	1	10339	7679	9402	1802	1769	1555	10339	7679	9402	1802	1769	1555	339	317	309	296	305	301	1.01	1	0
Tb927.1.3890	hypothetical protein	1	751	714	810	161	140	147	751	714	810	161	140	147	25	29	27	26	24	28	0.89	1	0
Tb927.1.390	hypothetical protein, unlikely	4.78	1706	1302	1665	413	319	329	357	272	348	86	67	69	12	11	11	14	12	13	0.92	1	0
Tb927.1.3900	hypothetical protein, unlikely	1	193	172	206	36	55	29	193	172	206	36	55	29	6	7	7	6	9	6	1.29	0	0
Tb927.1.3910	Anaphase promoting complex subunit CDC23	1	5009	3980	4912	1027	942	867	5009	3980	4912	1027	942	867	164	164	161	169	162	168	0.98	1	0
Tb927.1.3920	hypothetical protein, unlikely	1	272	214	207	34	31	38	272	214	207	34	31	38	9	9	7	6	5	7	0.71	0	0
Tb927.1.3930	hypothetical protein, unlikely	1	301	260	350	66	72	48	301	260	350	66	72	48	10	11	11	11	12	9	1.04	1	0
Tb927.1.3940	hypothetical protein, conserved	1	6093	4867	6008	1195	1088	1059	6093	4867	6008	1195	1088	1059	200	201	197	196	187	205	0.95	1	0
Tb927.1.3950	D-alanine aminotransferase (ALAT)	1	7426	6285	8062	1908	1823	1764	7426	6285	8062	1908	1823	1764	244	259	265	314	314	342	1.08	1	0
Tb927.1.3960	hypothetical protein, unlikely	1	238	213	380	60	71	46	238	213	380	60	71	46	8	9	12	10	12	9	1.04	1	0
Tb927.1.3970	hypothetical protein, unlikely	1	1054	852	1089	130	147	113	1054	852	1089	130	147	113	35	35	36	21	25	22	0.86	1	0
Tb927.1.3980	hypothetical protein, unlikely	1	1735	1457	1955	260	291	259	1735	1457	1955	260	291	259	57	60	64	43	50	50	0.93	1	0
Tb927.1.3990	hypothetical protein, unlikely	1	545	525	667	67	74	70	545	525	667	67	74	70	18	22	22	11	13	14	0.76	1	0
Tb927.1.40	hypothetical protein	1	3	2	6	2	0	2	3	2	6	2	0	2	0	0	0	0	0	0		0	0
Tb927.1.400	hypothetical protein, conserved	3.45	1983	1352	1672	389	285	284	575	392	485	113	83	82	19	16	16	19	14	16	0.78	1	0
Tb927.1.4000	hypothetical protein, unlikely	1	1081	641	1112	125	141	116	1081	641	1112	125	141	116	35	26	37	21	24	22	0.81	1	0
Tb927.1.4010	TbPRI2, primase 2, kDNA replication	1	6310	4771	5717	1303	1171	1006	6310	4771	5717	1303	1171	1006	207	197	188	214	202	195	1	1	0
Tb927.1.4020	hypothetical protein	1	969	737	844	92	115	101	969	737	844	92	115	101	32	30	28	15	20	20	0.91	1	0
Tb927.1.4030	hypothetical protein, unlikely	1	249	214	205	17	25	19	249	214	205	17	25	19	8	9	7	3	4	4	0.73	0	0
Tb927.1.4040	hypothetical protein, conserved	1	2046	1716	2095	425	390	344	2046	1716	2095	425	390	344	67	71	69	70	67	67	0.96	1	0
Tb927.1.4050	ser/thr protein phosphatase with EF-Hand domains (PPEF)	1	6270	5067	5933	1289	1224	958	6270	5067	5933	1289	1224	958	206	209	195	212	211	186	1.03	1	0
Tb927.1.4060	hypothetical protein, unlikely	1	131	177	257	48	36	30	131	177	257	48	36	30	4	7	8	8	6	6	0.71	0	0
Tb927.1.4070	hypothetical protein, unlikely	1	769	541	581	91	113	91	769	541	581	91	113	91	25	22	19	15	19	18	1.09	1	0
Tb927.1.4080	hypothetical protein, unlikely	1	776	693	896	141	130	86	776	693	896	141	130	86	25	29	29	23	22	17	0.83	1	0
Tb927.1.4090	hypothetical protein, unlikely	1	145	127	145	21	31	23	145	127	145	21	31	23	5	5	5	3	5	4	1.11	0	0
Tb927.1.410	retrotransposon hot spot protein (RHS, pseudogene), putative	6.98	47082	40418	48443	7873	7615	6904	6745	5791	6940	1128	1091	989	221	239	228	185	188	192	0.91	1	0
Tb927.1.4100	cytochrome oxidase subunit IV (COXIV)	1	1623	1116	1335	286	253	193	1623	1116	1335	286	253	193	53	46	44	47	44	37	0.96	1	0
Tb927.1.4120	hypothetical protein, unlikely	3.29	227	132	213	19	24	13	69	40	65	6	7	4	2	2	2	1	1	1	0.5	0	0
Tb927.1.4130	hypothetical protein, unlikely	3.43	470	295	357	56	44	43	137	86	104	16	13	13	4	4	3	3	2	3	0.57	0	0
Tb927.1.4140	Protein of unknown function (DUF1448), putative	1.94	1318	999	1200	249	238	204	679	515	619	128	123	105	22	21	20	21	21	20	1	1	0
Tb927.1.4150	hypothetical protein, unlikely	1	328	240	254	48	40	42	328	240	254	48	40	42	11	10	8	8	7	8	0.82	1	0
Tb927.1.4160	hypothetical protein, conserved	1	912	697	1018	198	186	152	912	697	1018	198	186	152	30	29	33	33	32	29	0.96	1	0
Tb927.1.4170	hypothetical protein, unlikely	1	108	99	145	27	34	19	108	99	145	27	34	19	4	4	5	4	6	4	1.2	0	0
Tb927.1.4180	leucine-rich repeat protein (LRRP)	1	4192	3364	4292	847	799	673	4192	3364	4292	847	799	673	138	139	141	139	138	130	0.98	1	0
Tb927.1.4190	hypothetical protein, unlikely	1	487	385	403	58	77	64	487	385	403	58	77	64	16	16	13	10	13	12	1.08	1	0
Tb927.1.420	retrotransposon hot spot protein 5 (RHS5), putative	3.95	28420	22493	27849	4356	4273	3659	7195	5694	7050	1103	1082	926	236	235	231	181	186	179	0.9	1	0
Tb927.1.4200	hypothetical protein, unlikely	1	365	280	437	36	41	38	365	280	437	36	41	38	12	12	14	6	7	7	0.67	1	0
Tb927.1.4210	hypothetical protein, unlikely	1	146	102	136	23	22	17	146	102	136	23	22	17	5	4	4	4	4	3	0.89	0	0
Tb927.1.4220	Ydr279p,RNaseH2 domain like,Winged Helix DNA binding	1	1820	1418	1728	308	276	278	1820	1418	1728	308	276	278	60	58	57	51	48	54	0.88	1	0
Tb927.1.4230	hypothetical protein, conserved	1	1997	1655	1799	354	362	337	1997	1655	1799	354	362	337	66	68	59	58	62	65	1.05	1	0
Tb927.1.4240	hypothetical protein, unlikely	1	480	395	463	71	89	57	480	395	463	71	89	57	16	16	15	12	15	11	1.07	1	0
Tb927.1.4250	hypothetical protein, conserved	1	2283	1928	2373	448	434	402	2283	1928	2373	448	434	402	75	79	78	74	75	78	0.98	1	0
Tb927.1.4260	hypothetical protein, unlikely	1	144	114	152	9	19	14	144	114	152	9	19	14	5	5	5	1	3	3	0.86	0	0
Tb927.1.4270	hypothetical protein, unlikely	1	302	243	298	38	38	37	302	243	298	38	38	37	10	10	10	6	7	7	0.82	0	0
Tb927.1.4280	hypothetical protein, conserved, African tryp specific, PTZ (tail-specific protease) domain	1	4619	3566	4115	788	710	572	4619	3566	4115	788	710	572	152	147	135	130	122	111	0.92	1	0
Tb927.1.4290	hypothetical protein, unlikely	1	296	226	286	38	44	47	296	226	286	38	44	47	10	9	9	6	8	9	1	0	0
Tb927.1.430	retrotransposon hot spot protein (RHS, pseudogene), putative	10.02	46632	36448	44732	8414	7642	7137	4654	3638	4464	840	763	712	153	150	147	138	131	138	0.92	1	0
Tb927.1.4300	chaperone DNAj, putative, J17	1	2754	2122	2233	419	398	352	2754	2122	2233	419	398	352	90	87	73	69	69	68	0.97	1	0
Tb927.1.4310	FAZ2 flagellar attachment zone protein	1.07	28818	23061	25435	5850	5689	4733	26933	21552	23771	5467	5317	4423	884	888	780	899	916	857	1.09	1	0
Tb927.1.4320	hypothetical protein, unlikely	1	1615	1311	1464	205	228	177	1615	1311	1464	205	228	177	53	54	48	34	39	34	0.94	1	0
Tb927.1.4330	hypothetical protein, unlikely	1	765	712	797	94	117	106	765	712	797	94	117	106	25	29	26	15	20	21	0.95	1	0
Tb927.1.4340	hypothetical protein, conserved	1	3351	2665	3121	602	607	550	3351	2665	3121	602	607	550	110	110	102	99	105	107	1.04	1	0
Tb927.1.4350	hypothetical protein, unlikely	1	823	633	779	114	112	93	823	633	779	114	112	93	27	26	26	19	19	18	0.83	1	0
Tb927.1.4360	hypothetical protein, unlikely	1	168	105	109	16	20	9	168	105	109	16	20	9	6	4	4	3	3	2	0.75	0	0
Tb927.1.4370	Putative integral membrane protein conserved region (DUF2404), putative	1	3096	2392	2907	532	528	477	3096	2392	2907	532	528	477	102	99	95	87	91	92	0.99	1	0
Tb927.1.4380	Putative integral membrane protein conserved region (DUF2404), putative	1	2739	2142	2425	459	529	442	2739	2142	2425	459	529	442	90	88	80	75	91	86	1.17	1	0
Tb927.1.4390	hypothetical protein, unlikely	1	141	107	107	25	16	12	141	107	107	25	16	12	5	4	4	4	3	2	0.67	0	0
Tb927.1.4400	hypothetical protein, conserved	1	1349	1079	1242	257	247	199	1349	1079	1242	257	247	199	44	44	41	42	43	39	1.02	1	0
Tb927.1.4410	hypothetical protein, conserved	1	3337	3002	3638	692	651	560	3337	3002	3638	692	651	560	110	124	119	114	112	109	0.96	1	0
Tb927.1.4420	ABC transporter, putative	1	2667	2054	2412	483	433	426	2667	2054	2412	483	433	426	88	85	79	79	75	83	0.94	1	0
Tb927.1.4430	hypothetical protein, unlikely	1	267	174	223	27	19	31	267	174	223	27	19	31	9	7	7	4	3	6	0.5	0	0
Tb927.1.4440	hypothetical protein, conserved	1	436	306	379	49	68	51	436	306	379	49	68	51	14	13	12	8	12	10	1.14	1	0
Tb927.1.4450	Ion channel/Calcium-activated BK potassium channel alpha subunit, putative	1	4941	3837	4805	903	872	753	4941	3837	4805	903	872	753	162	158	158	148	150	146	0.98	1	0
Tb927.1.4460	hypothetical protein, unlikely	1	353	234	336	38	44	39	353	234	336	38	44	39	12	10	11	6	8	8	0.89	1	0
Tb927.1.4470	hypothetical protein, conserved	1	1985	1449	1663	354	348	330	1985	1449	1663	354	348	330	65	60	55	58	60	64	1.05	1	0
Tb927.1.4480	WD repeat and HMG-box DNA-binding protein, putative	1	6722	5469	6347	1312	1181	1032	6722	5469	6347	1312	1181	1032	221	225	208	216	203	200	0.96	1	0
Tb927.1.4490	acetyltransferase, putative	1	2330	1992	2133	429	369	309	2330	1992	2133	429	369	309	76	82	70	71	64	60	0.9	1	0
Tb927.1.450	retrotransposon hot spot protein (RHS, pseudogene), putative	13.71	63535	49702	59991	10778	9951	9158	4634	3625	4376	786	726	668	152	149	144	129	125	129	0.91	1	0
Tb927.1.4500	SNARE associated Golgi protein, putative	1	2187	1769	2139	356	388	343	2187	1769	2139	356	388	343	72	73	70	59	67	66	1.03	1	0
Tb927.1.4510	hypothetical protein, unlikely	1	1364	1057	1384	174	181	164	1364	1057	1384	174	181	164	45	44	45	29	31	32	0.83	1	0
Tb927.1.4520	Zinc finger, C3HC4 type (RING finger), putative	1	2388	1721	2272	523	509	447	2388	1721	2272	523	509	447	78	71	75	86	88	87	1.09	1	0
Tb927.1.4530	hypothetical protein, unlikely	1	210	132	138	31	37	26	210	132	138	31	37	26	7	5	5	5	6	5	1.09	0	0
Tb927.1.4540	cyclin-like F-box protein (CFB1A)	10.03	19336	14680	18964	4226	3171	2621	1928	1464	1891	421	316	261	63	60	62	69	54	51	0.82	1	0
Tb927.1.4550	CFB1A 3UTR	6.75	2567	1778	2114	232	248	199	380	263	313	34	37	29	12	11	10	6	6	6	0.71	1	0
Tb927.1.4560	cyclin-like F-box protein (CFB1B)	8.76	19322	14665	18943	4217	3165	2620	2206	1674	2162	481	361	299	72	69	71	79	62	58	0.82	1	0
Tb927.1.4570	CFB1B 3UTR	20.56	2911	2062	2466	319	321	251	142	100	120	16	16	12	5	4	4	3	3	2	0.75	0	0
Tb927.1.4580	cyclin-like F-box protein (CFB1C)	11.39	19326	14673	18956	4224	3168	2620	1697	1288	1664	371	278	230	56	53	55	61	48	45	0.82	1	0
Tb927.1.4590	CFB1C 3UTR	6.68	2567	1778	2114	232	248	199	384	266	316	35	37	30	13	11	10	6	6	6	0.71	1	0
Tb927.1.460	hypothetical protein, unlikely	89.64	3467	2904	3736	398	461	410	39	32	42	4	5	5	1	1	1	1	1	1	0.67	0	0
Tb927.1.4600	cyclin-like F-box protein (CFB1D)	7.32	19355	14698	18980	4222	3165	2622	2644	2008	2593	577	432	358	87	83	85	95	74	69	0.82	1	0
Tb927.1.4610	CFB1D 3UTR	6.81	1994	1428	1923	342	319	295	293	210	282	50	47	43	10	9	9	8	8	8	0.89	0	0
Tb927.1.4620	CFB1D 3UTR2	6.59	3006	2146	2522	325	327	254	456	326	383	49	50	39	15	13	13	8	9	8	0.82	1	0
Tb927.1.4630	cyclin-like F-box protein (CFB1E)	8.85	19339	14681	18965	4226	3171	2621	2185	1659	2143	478	358	296	72	68	70	79	62	57	0.83	1	0
Tb927.1.4640	CFB1E 3UTR	6.57	1994	1428	1923	342	319	295	304	217	293	52	49	45	10	9	10	9	8	9	0.8	0	0
Tb927.1.4650	cyclin-like F-box protein (CFB2)	1.52	18494	14617	16175	3533	1336	1186	12167	9616	10641	2324	879	780	399	396	349	382	151	151	0.41	1	4
Tb927.1.4660	CFB2 3UTRa	1	3751	2615	3218	318	42	39	3751	2615	3218	318	42	39	123	108	106	52	7	8	0.09	1	4
Tb927.1.4670	CFB2 3UTRb	1	2707	1909	2194	243	27	37	2707	1909	2194	243	27	37	89	79	72	40	5	7	0.09	1	4
Tb927.1.4680	KKIP6 Kinetochore interacting protein 6	1	1265	1161	1595	281	257	220	1265	1161	1595	281	257	220	42	48	52	46	44	43	0.89	1	0
Tb927.1.4690	arginine N-methyltransferase (PRMT1)	1	3672	2913	3120	534	412	374	3672	2913	3120	534	412	374	121	120	102	88	71	72	0.74	1	0
Tb927.1.470	Protein of unknown function (DUF1181), putative	31.05	3559	2653	4426	580	560	500	115	85	143	19	18	16	4	4	5	3	3	3	0.67	0	0
Tb927.1.4700	hypothetical protein, conserved	1	1099	866	1054	243	206	175	1099	866	1054	243	206	175	36	36	35	40	35	34	0.92	1	0
Tb927.1.4710	hypothetical protein, conserved	1	540	495	617	117	124	95	540	495	617	117	124	95	18	20	20	19	21	18	1.05	1	0
Tb927.1.4720	SET domain containing protein, putative	1	3044	2454	3410	485	594	482	3044	2454	3410	485	594	482	100	101	112	80	102	93	1.06	1	0
Tb927.1.4730	Ribonuclease H2 non-catalytic subunit (Ylr154p-like), putative	1	661	571	760	155	137	145	661	571	760	155	137	145	22	24	25	25	24	28	0.94	1	0
Tb927.1.4740	FAM91 N-terminus/FAM91 C-terminus, putative	1	5098	3787	4617	871	810	744	5098	3787	4617	871	810	744	167	156	152	143	140	144	0.95	1	0
Tb927.1.4750	hypothetical protein, unlikely	1	599	485	558	73	76	66	599	485	558	73	76	66	20	20	18	12	13	13	0.84	1	0
Tb927.1.4760	Vacuolar sorting protein 39 domain 1/Vacuolar sorting protein 39 domain 2, putative	1	5123	4017	4969	906	870	785	5123	4017	4969	906	870	785	168	166	163	149	150	152	0.96	1	0
Tb927.1.4770	hypothetical protein, unlikely	1	67	44	78	7	11	7	67	44	78	7	11	7	2	2	3	1	2	1	0.8	0	0
Tb927.1.4780	Alpha/beta hydrolase domain-containing protein	1	2156	1620	2225	452	421	379	2156	1620	2225	452	421	379	71	67	73	74	73	73	0.99	1	0
Tb927.1.4790	hypothetical protein, unlikely	1	418	332	447	62	62	64	418	332	447	62	62	64	14	14	15	10	11	12	0.85	1	0
Tb927.1.480	leucine-rich repeat protein (LRRP)	16.78	65403	47650	60682	9623	9198	8061	3898	2840	3616	573	548	480	128	117	119	94	94	93	0.88	1	0
Tb927.1.4800	hypothetical protein, conserved	1	1223	949	1165	210	202	210	1223	949	1165	210	202	210	40	39	38	35	35	41	0.95	1	0
Tb927.1.4810	hypothetical protein, conserved (pseudogene)	1.71	934	758	863	131	143	99	546	443	505	77	84	58	18	18	17	13	14	11	0.9	1	0
Tb927.1.4820	hypothetical protein, unlikely	1	103	52	71	7	6	6	103	52	71	7	6	6	3	2	2	1	1	1	0.5	0	0
Tb927.1.4830	Phospholipase A1	1	3071	2386	5144	703	711	594	3071	2386	5144	703	711	594	101	98	169	116	122	115	0.85	1	0
Tb927.1.4840	hypothetical protein, unlikely	1	1288	858	1989	191	244	169	1288	858	1989	191	244	169	42	35	65	31	42	33	0.87	1	0
Tb927.1.4850	hypothetical protein, unlikely	1	270	202	283	32	40	38	270	202	283	32	40	38	9	8	9	5	7	7	0.93	0	0
Tb927.1.4860	ESAG11 pseudogene	4.52	2022	2002	3025	361	470	416	447	443	669	80	104	92	15	18	22	13	18	18	1	1	0
Tb927.1.4870	ESAG1, putative	2.35	4028	3245	4159	637	750	675	1714	1381	1770	271	319	287	56	57	58	45	55	56	1.06	1	0
Tb927.1.4880	hypothetical protein, unlikely	2.3	447	463	625	93	81	70	194	201	272	40	35	30	6	8	9	7	6	6	0.71	0	0
Tb927.1.4890	ESAG2, putative	3.21	12160	10041	14714	2039	3162	2499	3788	3128	4584	635	985	779	124	129	150	104	170	151	1.33	1	0
Tb927.1.490	hypothetical protein	32.64	8180	6373	7514	883	963	889	251	195	230	27	30	27	8	8	8	4	5	5	0.77	0	0
Tb927.1.4900	ESAG11, putative	1.76	14807	13536	19008	3031	3718	3263	8413	7691	10800	1722	2113	1854	276	317	355	283	364	359	1.14	1	0
Tb927.1.4910	ESAG1, putative	1.81	3726	3099	4050	632	677	626	2059	1712	2238	349	374	346	68	71	73	57	64	67	0.98	1	0
Tb927.1.4920	hypothetical protein	1.14	616	513	660	97	92	86	540	450	579	85	81	75	18	19	19	14	14	15	0.82	1	0
Tb927.1.4930	hypothetical protein, unlikely	1	466	384	547	92	75	54	466	384	547	92	75	54	15	16	18	15	13	10	0.76	1	0
Tb927.1.4940	hypothetical protein, unlikely	1	146	142	173	41	20	25	146	142	173	41	20	25	5	6	6	7	3	5	0.43	0	0
Tb927.1.4950	hypothetical protein, unlikely	1	227	173	246	50	44	23	227	173	246	50	44	23	7	7	8	8	8	4	0.94	0	0
Tb927.1.4960	hypothetical protein, unlikely	1	32	16	34	9	5	3	32	16	34	9	5	3	1	1	1	1	1	1		0	0
Tb927.1.4970	hypothetical protein	1	200	133	146	32	27	31	200	133	146	32	27	31	7	5	5	5	5	6	0.91	0	0
Tb927.1.4980	hypothetical protein, unlikely	1	66	64	85	13	8	9	66	64	85	13	8	9	2	3	3	2	1	2	0.33	0	0
Tb927.1.4990	hypothetical protein, unlikely	1	128	99	122	12	15	22	128	99	122	12	15	22	4	4	4	2	3	4	0.86	0	0
Tb927.1.50	hypothetical protein, unlikely	1.48	391	278	348	76	62	59	264	188	235	51	42	40	9	8	8	8	7	8	0.82	0	0
Tb927.1.500	retrotransposon hot spot protein (RHS, pseudogene), putative	11.53	36476	27526	33585	6316	5913	5371	3164	2387	2913	548	513	466	104	98	96	90	88	90	0.94	1	0
Tb927.1.5000	hypothetical protein, conserved, possibly mitochondrial, no yeast or human match	1	1432	1129	1368	265	207	215	1432	1129	1368	265	207	215	47	47	45	44	36	42	0.8	1	0
Tb927.1.5010	hypothetical protein, unlikely	1	213	183	263	46	38	37	213	183	263	46	38	37	7	8	9	8	7	7	0.78	0	0
Tb927.1.5020	hypothetical protein, unlikely	1	178	162	232	33	28	37	178	162	232	33	28	37	6	7	8	5	5	7	0.71	0	0
Tb927.1.5030	leucine-rich repeat protein (LRRP)	1	2570	2000	2684	450	421	403	2570	2000	2684	450	421	403	84	82	88	74	73	78	0.9	1	0
Tb927.1.5040	hypothetical protein, unlikely	1	355	287	358	41	43	52	355	287	358	41	43	52	12	12	12	7	7	10	0.7	1	0
Tb927.1.5050	hypothetical protein, unlikely	1	463	329	381	55	64	61	463	329	381	55	64	61	15	14	13	9	11	12	0.96	1	0
Tb927.1.5060	variant surface glycoprotein (VSG)-related, putative	1.14	2984	2736	3312	644	684	523	2618	2400	2905	565	600	459	86	99	95	93	103	89	1.09	1	0
Tb927.1.5070	hypothetical protein, unlikely	1	746	495	627	67	94	63	746	495	627	67	94	63	24	20	21	11	16	12	0.97	1	0
Tb927.1.5080	ESAG9, putative	1	758	600	791	154	130	139	758	600	791	154	130	139	25	25	26	25	22	27	0.85	1	0
Tb927.1.5090	ESAG1 pseudogene	1.95	611	475	571	85	97	85	313	244	293	44	50	44	10	10	10	7	9	9	1	0	0
Tb927.1.5100	ESAG2, putative	1.89	12832	11214	16077	2419	3671	2839	6789	5933	8506	1280	1942	1502	223	245	279	210	334	291	1.36	1	0
Tb927.1.5110	ESAG11, putative	3.16	12581	11332	16235	2656	3190	2870	3981	3586	5138	841	1009	908	131	148	169	138	174	176	1.13	1	0
Tb927.1.5120	ESAG1, putative	1.87	2570	2142	2797	362	433	391	1374	1145	1496	194	232	209	45	47	49	32	40	41	0.98	1	0
Tb927.1.5130	hypothetical protein, unlikely	1	202	110	148	19	33	24	202	110	148	19	33	24	7	5	5	3	6	5	1.33	0	0
Tb927.1.5140	hypothetical protein, unlikely	1.45	1135	878	1077	199	187	179	783	606	743	137	129	123	26	25	24	23	22	24	0.92	1	0
Tb927.1.5150	hypothetical protein	1.45	278	181	242	41	48	36	192	125	167	28	33	25	6	5	5	5	6	5	1.09	0	0
Tb927.1.5160	hypothetical protein	1.07	593	436	577	92	108	87	554	407	539	86	101	81	18	17	18	14	17	16	1.03	1	0
Tb927.1.5170	variant surface glycoprotein (VSG)-related, putative	1.11	3580	3016	3395	569	578	514	3225	2717	3059	513	521	463	106	112	100	84	90	90	0.97	1	0
Tb927.1.5180	hypothetical protein	1	680	561	718	115	127	93	680	561	718	115	127	93	22	23	24	19	22	18	1	1	0
Tb927.1.5190	hypothetical protein, unlikely	1	573	503	678	94	78	86	573	503	678	94	78	86	19	21	22	15	13	17	0.68	1	0
Tb927.1.520	VSG pseudogene,variant surface glycoprotein, fragment	1	301	187	349	41	49	35	301	187	349	41	49	35	10	8	11	7	8	7	0.84	1	0
Tb927.1.5200	ESAG1, putative	1.55	1303	1086	1424	258	304	262	841	701	919	166	196	169	28	29	30	27	34	33	1.17	1	0
Tb927.1.5210	hypothetical protein, unlikely		0	0	0	0	0	0							0	0	0	0	0	0		0	0
Tb927.1.5220	ESAG9, putative		0	0	0	0	0	0							0	0	0	0	0	0		0	0
Tb927.1.5230	hypothetical protein, unlikely		0	0	0	0	0	0							0	0	0	0	0	0		0	0
Tb927.1.5235	ESAG1 pseudogene		0	0	0	0	0	0							0	0	0	0	0	0		0	0
Tb927.1.5240	ESAG1, putative	1.6	619	553	644	106	142	103	387	346	403	66	89	64	13	14	13	11	15	12	1.2	1	0
Tb927.1.5250	hypothetical protein	2.21	75	66	86	12	14	10	34	30	39	5	6	5	1	1	1	1	1	1	0.67	0	0
Tb927.1.5260	hypothetical protein	1.82	175	136	169	38	29	30	96	75	93	21	16	16	3	3	3	3	3	3	0.86	0	0
Tb927.1.5270	hypothetical protein, unlikely	1	7	5	12	2	0	0	7	5	12	2	0	0	0	0	0	0	0	0		0	0
Tb927.1.5280	ESAG3 pseudogene	260.69	4977	4115	4780	808	979	884	19	16	18	3	4	3	1	1	1	0	1	1	1	0	0
Tb927.1.5290	hypothetical protein, unlikely		1	0	2	0	0	0							0	0	0	0	0	0		0	0
Tb927.1.530	hypothetical protein, conserved	1.12	1513	1058	1200	221	185	202	1351	945	1071	197	165	180	44	39	35	32	28	35	0.82	1	0
Tb927.1.5300	variant surface glycoprotein (VSG), putative		0	0	0	0	0	0							0	0	0	0	0	0		0	0
Tb927.1.5310	hypothetical protein, unlikely		0	1	0	0	0	0							0	0	0	0	0	0		0	0
Tb927.1.5320	VSG pseudogene	2.4	28	14	31	3	4	2	12	6	13	1	2	1	0	0	0	0	0	0		0	0
Tb927.1.5330	variant surface glycoprotein (VSG, atypical), putative		0	1	0	0	0	0							0	0	0	0	0	0		0	0
Tb927.1.5340	ESAG3 pseudogene	7.15	7444	8945	11751	1818	2331	2040	1041	1251	1643	254	326	285	34	52	54	42	56	55	1.15	1	0
Tb927.1.540	DNA-directed RNA polymerase III, putative, (RPC128)	1.84	12468	9625	11705	1921	1758	1669	6776	5231	6361	1044	955	907	222	216	209	172	164	176	0.86	1	0
Tb927.1.550	hypothetical protein, unlikely	1	178	151	192	31	27	26	178	151	192	31	27	26	6	6	6	5	5	5	0.83	0	0
Tb927.1.560	WD domain, G-beta repeat, putative	1	1985	1541	2013	300	281	290	1985	1541	2013	300	281	290	65	64	66	49	48	56	0.83	1	0
Tb927.1.570	Histone-lysine N-methyltransferase, H3 lysine-76 specific (DOT1B)	1	1041	836	1119	188	172	192	1041	836	1119	188	172	192	34	34	37	31	30	37	0.87	1	0
Tb927.1.580	phosphate-repressible phosphate permease, putative	2.53	4183	2945	4644	758	789	658	1653	1164	1836	300	312	260	54	48	60	49	54	50	0.98	1	0
Tb927.1.590	hypothetical protein, unlikely	2.28	1513	1017	1485	261	247	217	664	446	651	114	108	95	22	18	21	19	19	18	0.93	1	0
Tb927.1.60	RNA polymerase (pseudogene), putative	15.44	73041	55514	70017	10421	9861	8859	4731	3595	4535	675	639	574	155	148	149	111	110	111	0.84	1	0
Tb927.1.600	phosphate-repressible phosphate permease, putative	1.6	4457	3114	4913	787	833	687	2786	1946	3071	492	521	429	91	80	101	81	90	83	0.98	1	0
Tb927.1.610	hypothetical protein, conserved	1	1241	1085	1293	213	189	176	1241	1085	1293	213	189	176	41	45	42	35	33	34	0.85	1	0
Tb927.1.620	hypothetical protein, unlikely	1	299	231	326	46	54	41	299	231	326	46	54	41	10	10	11	8	9	8	0.9	1	0
Tb927.1.630	anti-silencing protein ASF1A	1	786	627	831	155	153	116	786	627	831	155	153	116	26	26	27	25	26	22	0.98	1	0
Tb927.1.640	BRCA2, acts in recombination, antigenic variation	5.75	48818	36929	45035	6168	6661	6133	8490	6422	7832	1073	1158	1067	279	265	257	176	199	207	0.92	1	0
Tb927.1.650	conserved protein, unknown function	1	636	515	653	139	137	125	636	515	653	139	137	125	21	21	21	23	24	24	1.07	1	0
Tb927.1.660	hypothetical protein, unlikely	1	156	197	262	49	54	38	156	197	262	49	54	38	5	8	9	8	9	7	1	0	0
Tb927.1.670	conserved protein, unknown function	1	3281	2660	3234	624	577	566	3281	2660	3234	624	577	566	108	110	106	103	99	110	0.94	1	0
Tb927.1.680	hypothetical protein, unlikely	1	511	417	465	75	63	58	511	417	465	75	63	58	17	17	15	12	11	11	0.79	1	0
Tb927.1.690	hypothetical protein, conserved	1	1150	1016	1272	233	221	215	1150	1016	1272	233	221	215	38	42	42	38	38	42	0.94	1	0
Tb927.1.70	retrotransposon hot spot protein 4 (RHS4), putative	13.45	18610	14653	17845	2678	2565	2341	1384	1089	1327	199	191	174	45	45	44	33	33	34	0.85	1	0
Tb927.1.700	phosphoglycerate kinase (PGKC)	1.46	18473	15585	20811	3390	3048	2961	12653	10675	14254	2322	2088	2028	415	440	468	382	360	393	0.85	1	0
Tb927.1.710	phosphoglycerate kinase (PGKB)	3.85	15101	12733	17224	2740	2499	2410	3922	3307	4474	712	649	626	129	136	147	117	112	121	0.85	1	0
Tb927.1.720	phosphoglycerate kinase (PGKA)	3.41	10811	8813	12087	1797	1651	1600	3170	2584	3545	527	484	469	104	107	116	87	83	91	0.81	1	0
Tb927.1.730	NADH-ubiquinone oxidoreductase complex I subunit, putative	1	2722	2084	2699	450	442	396	2722	2084	2699	450	442	396	89	86	89	74	76	77	0.93	1	0
Tb927.1.740	phosphatidylinositol-4-phosphate 5-kinase related	1	2147	1913	2265	421	405	341	2147	1913	2265	421	405	341	70	79	74	69	70	66	0.97	1	0
Tb927.1.750	Metal-binding domain-containing protein	5.49	43416	32850	38543	7727	7453	6138	7908	5984	7021	1407	1358	1118	260	247	230	231	234	217	1.01	1	0
Tb927.1.760	wd40 repeat domain-containing protein	1	2311	1812	2218	425	445	387	2311	1812	2218	425	445	387	76	75	73	70	77	75	1.07	1	0
Tb927.1.770	hypothetical protein, unlikely	1	175	159	209	29	38	31	175	159	209	29	38	31	6	7	7	5	7	6	1.08	0	0
Tb927.1.780	leucine-rich repeat-containing protein	1.97	1550	1146	1409	250	242	209	787	582	715	127	123	106	26	24	23	21	21	21	0.93	1	0
Tb927.1.790	hypothetical transmembrane protein, conserved	1.67	2608	2096	2695	443	463	387	1562	1255	1614	265	277	232	51	52	53	44	48	45	0.98	1	0
Tb927.1.80	hypothetical protein, unlikely	42.94	4419	3245	4201	444	455	411	103	76	98	10	11	10	3	3	3	2	2	2	0.67	0	0
Tb927.1.800	hypothetical protein, unlikely	1	540	387	412	67	63	41	540	387	412	67	63	41	18	16	14	11	11	8	0.85	1	0
Tb927.1.810	hypothetical protein, unlikely	1	467	356	451	57	56	51	467	356	451	57	56	51	15	15	15	9	10	10	0.8	1	0
Tb927.1.820	kelch domain-containing protein	1	2198	1620	1801	317	297	251	2198	1620	1801	317	297	251	72	67	59	52	51	49	0.91	1	0
Tb927.1.830	hypothetical protein, conserved	1.91	4011	3082	3854	682	639	565	2100	1614	2018	357	335	296	69	67	66	59	58	57	0.92	1	0
Tb927.1.840	transmembrane protein, putative	1	816	628	819	137	123	136	816	628	819	137	123	136	27	26	27	23	21	26	0.82	1	0
Tb927.1.850	hypothetical protein, unlikely	1	863	704	992	117	138	115	863	704	992	117	138	115	28	29	33	19	24	22	0.91	1	0
Tb927.1.860	transmembrane protein, putative	1	3092	2683	3560	687	778	680	3092	2683	3560	687	778	680	101	111	117	113	134	132	1.16	1	0
Tb927.1.870	deoxyhypusine synthase, putative	1	2002	1675	2074	377	346	301	2002	1675	2074	377	346	301	66	69	68	62	60	58	0.92	1	0
Tb927.1.880	MDN1 homologue. Dynein-related AAA ATPase involved in pre-60S assembly and export	1.14	34037	25898	34781	5730	5604	4694	29857	22718	30510	5026	4916	4118	980	936	1002	826	847	798	0.93	1	0
Tb927.1.890	hypothetical protein, conserved	1.9	1502	1113	1573	256	249	205	791	586	828	135	131	108	26	24	27	22	23	21	0.92	1	0
Tb927.1.90	retrotransposon hot spot protein (RHS, pseudogene), putative	19.87	45912	38667	46287	7019	7063	6258	2311	1946	2329	353	355	315	76	80	76	58	61	61	0.9	1	0
Tb927.1.900	hypothetical protein, unlikely	1	13	10	28	6	2	6	13	10	28	6	2	6	0	0	1	1	0	1		0	0
Tb927.1.910	hypothetical protein, unlikely		0	0	2	3	3	1							0	0	0	0	0	0		0	0
Tb927.1.920	hypothetical protein, unlikely		1	0	2	0	0	1							0	0	0	0	0	0		0	0
Tb927.1.930	hypothetical protein, unlikely	1.63	4	5	14	5	0	2	2	3	9	3	0	1	0	0	0	0	0	0		0	0
Tb927.1.940	hypothetical protein, unlikely	1.94	48	57	59	9	7	10	25	29	30	5	4	5	1	1	1	1	1	1	0.67	0	0
Tb927.1.950	hypothetical protein, unlikely	3.63	45	36	51	6	6	9	12	10	14	2	2	2	0	0	0	0	0	0	0	0	0
Tb927.1.960	hypothetical protein, unlikely	2.35	133	109	129	17	13	16	57	46	55	7	6	7	2	2	2	1	1	1	0.5	0	0
Tb927.1.970	hypothetical protein, unlikely	1.43	231	161	192	32	44	30	162	113	134	22	31	21	5	5	4	4	5	4	1.11	0	0
Tb927.1.980	hypothetical protein, unlikely	1	72	76	82	12	8	10	72	76	82	12	8	10	2	3	3	2	1	2	0.33	0	0
Tb927.1.990	Enkuring domain-containig protein	1	2352	2111	2389	403	385	324	2352	2111	2389	403	385	324	77	87	78	66	66	63	0.91	1	0
Tb927.10.10	variant surface glycoprotein VSG 10.1		0	0	0	0	0	0							0	0	0	0	0	0		0	0
Tb927.10.100	ESAG2 pseudogene	4.84	3108	2638	4326	717	972	874	642	545	894	148	201	181	21	22	29	24	35	35	1.3	1	0
Tb927.10.1000	hypothetical protein	1	519	387	448	68	63	64	519	387	448	68	63	64	17	16	15	11	11	12	0.81	1	0
Tb927.10.10000	hypothetical protein, conserved	1	3180	2423	2701	437	824	697	3180	2423	2701	437	824	697	104	100	89	72	142	135	1.75	1	2
Tb927.10.10010	60S acidic ribosomal subunit	1	1947	1657	1878	358	285	234	1947	1657	1878	358	285	234	64	68	62	59	49	45	0.8	1	0
Tb927.10.10020	Vacuolar sorting protein 9 (VPS9) domain containing protein, putative	1.69	2401	1843	2331	402	402	372	1421	1091	1379	238	238	220	47	45	45	39	41	43	0.96	1	0
Tb927.10.10030	hypothetical protein, conserved	1	668	497	663	115	92	104	668	497	663	115	92	104	22	20	22	19	16	20	0.76	1	0
Tb927.10.10040	hypothetical protein	1	259	223	315	48	63	54	259	223	315	48	63	54	9	9	10	8	11	10	1.16	1	0
Tb927.10.10050	hypothetical protein, conserved, 8 TM domains	1	14867	11902	14529	2639	2700	2166	14867	11902	14529	2639	2700	2166	488	491	477	434	465	420	1.02	1	0
Tb927.10.10060	hypothetical protein, unlikely	1	1278	1103	1461	237	219	176	1278	1103	1461	237	219	176	42	45	48	39	38	34	0.86	1	0
Tb927.10.10070	hypothetical protein, conserved	1.59	1930	1422	1836	310	294	236	1214	894	1155	195	185	148	40	37	38	32	32	29	0.9	1	0
Tb927.10.10080	hypothetical protein, conserved	1	690	650	722	186	154	123	690	650	722	186	154	123	23	27	24	31	27	24	0.96	1	0
Tb927.10.10090	CMF14, possible component of motile flagella, TbTBC-L	1	6343	4787	5898	1166	1037	983	6343	4787	5898	1166	1037	983	208	197	194	192	179	191	0.93	1	0
Tb927.10.1010	hypothetical protein	1	74	74	77	8	7	12	74	74	77	8	7	12	2	3	3	1	1	2	0.4	0	0
Tb927.10.10100	hypothetical protein, conserved	1	3491	2678	3338	592	547	554	3491	2678	3338	592	547	554	115	110	110	97	94	107	0.9	1	0
Tb927.10.10110	PIG-P, putative	1	556	483	528	112	109	109	556	483	528	112	109	109	18	20	17	18	19	21	1.06	1	0
Tb927.10.10120	hypothetical protein, conserved	1	3323	2597	3454	642	576	483	3323	2597	3454	642	576	483	109	107	113	106	99	94	0.9	1	0
Tb927.10.10130	REMC1 mitochondrial RNA binding complex 1 subunit (MRB10130)	1	2593	2079	2488	424	444	396	2593	2079	2488	424	444	396	85	86	82	70	76	77	0.99	1	0
Tb927.10.10140	paraflagellar rod protein PFC19	1	7966	6877	8121	1589	1460	1163	7966	6877	8121	1589	1460	1163	261	283	267	261	251	225	0.95	1	0
Tb927.10.10150	hypothetical protein, conserved	1	2723	2256	2538	510	419	434	2723	2256	2538	510	419	434	89	93	83	84	72	84	0.86	1	0
Tb927.10.10160	KPAF4	1	1932	1465	1723	315	302	256	1932	1465	1723	315	302	256	63	60	57	52	52	50	0.95	1	0
Tb927.10.10170	PRL1 / Prp46	1	1740	1350	1808	362	367	319	1740	1350	1808	362	367	319	57	56	59	60	63	62	1.05	1	0
Tb927.10.10180	Miro-like protein, putative	1	1282	1097	1345	227	269	224	1282	1097	1345	227	269	224	42	45	44	37	46	43	1.12	1	0
Tb927.10.10190	Homologue of GRR1, and F-box component of the SCF ubiquitin ligase complex.	1	3483	2640	3153	575	597	556	3483	2640	3153	575	597	556	114	109	104	95	103	108	1.03	1	0
Tb927.10.1020	hypothetical protein	1.02	56	62	71	23	12	16	55	61	70	23	12	16	2	3	2	4	2	3	0.57	0	0
Tb927.10.10200	hypothetical protein, conserved, no yeast homologue.	1	2073	1607	2040	350	398	304	2073	1607	2040	350	398	304	68	66	67	58	69	59	1.1	1	0
Tb927.10.10210	procyclin-associated gene 4 (PAG4) protein (PAG4)	1	140	163	261	40	32	47	140	163	261	40	32	47	5	7	9	7	6	9	0.71	0	0
Tb927.10.10220	procyclin-associated gene 2 (PAG2) protein (PAG2)	1	97	89	217	82	60	68	97	89	217	82	60	68	3	4	7	13	10	13	0.95	1	0
Tb927.10.10230	procyclin-associated gene 5 (PAG5) protein (PAG5)	1.19	118	121	187	59	37	46	99	102	157	50	31	39	3	4	5	8	5	8	0.71	0	0
Tb927.10.10240	procyclin-associated gene 1 (PAG1) protein (PAG1)	1.78	243	202	396	110	72	72	137	113	222	62	40	40	4	5	7	10	7	8	0.78	0	0
Tb927.10.10250	EP2 procyclin	5.33	254	241	547	249	122	124	48	45	103	47	23	23	2	2	3	8	4	4	0.67	0	0
Tb927.10.10260	EP1 procyclin	3.36	403	374	893	405	193	226	120	111	266	121	57	67	4	5	9	20	10	13	0.67	1	0
Tb927.10.10270	hypothetical protein, no non-kinetoplastid matches, no domains	1	76	41	52	22	18	10	76	41	52	22	18	10	2	2	2	4	3	2	0.86	0	0
Tb927.10.10280	BBP268	16.04	474250	344645	404836	85051	87793	72663	29567	21487	25239	5302	5473	4530	971	886	829	872	943	878	1.11	1	0
Tb927.10.10290	hypothetical protein, conserved, no domains	3.64	2813	2207	2689	567	468	429	773	606	739	156	129	118	25	25	24	26	22	23	0.86	1	0
Tb927.10.1030	serine peptidase, Clan SC, Family S10 (CBP1)	5.04	13381	10424	11962	2516	3073	2558	2655	2068	2373	499	610	508	87	85	78	82	105	98	1.3	1	0
Tb927.10.10300	hypothetical protein, conserved	1.54	1820	1460	1797	328	330	289	1182	948	1167	213	214	188	39	39	38	35	37	36	1	1	0
Tb927.10.10310	hypothetical protein, conserved. metallo protease like	1.93	1623	1254	1467	340	305	275	841	650	760	176	158	142	28	27	25	29	27	28	0.98	1	0
Tb927.10.10320	dynein light chain, putative,dynein Tctex1 family, putative	1.43	1102	946	1166	168	182	183	771	662	815	117	127	128	25	27	27	19	22	25	0.94	1	0
Tb927.10.10330	Anaphase-promoting complex CDC27	1.08	2490	2036	2439	438	437	437	2306	1885	2258	406	405	405	76	78	74	67	70	78	0.99	1	0
Tb927.10.10340	structural maintenance of chromosome 2 (SMC2)	1.4	8389	6948	8314	1629	1697	1365	5992	4963	5939	1164	1212	975	197	205	195	191	209	189	1.08	1	0
Tb927.10.10350	protein kinase, putative	1	3412	2825	3363	598	642	522	3412	2825	3363	598	642	522	112	116	110	98	111	101	1.06	1	0
Tb927.10.10360	microtubule-associated protein, putative	19.96	160333	117901	128931	28293	28044	26747	8033	5907	6459	1417	1405	1340	264	243	212	233	242	260	1.09	1	0
Tb927.10.10370	hypothetical protein, conserved	1.92	2818	2211	2691	567	469	429	1468	1152	1402	295	244	223	48	47	46	48	42	43	0.88	1	0
Tb927.10.10380	ATP-dependent DEAD/H RNA helicase, putative Dbp8, ribosome biogenesis?	1	3536	2805	3253	600	558	579	3536	2805	3253	600	558	579	116	116	107	99	96	112	0.93	1	0
Tb927.10.10390	trypanothione reductase	1.16	7484	5873	7468	1433	1365	1233	6452	5063	6438	1235	1177	1063	212	209	211	203	203	206	0.98	1	0
Tb927.10.1040	serine peptidase, Clan SC, Family S10 (CBP1)	3.05	15167	11806	13518	2748	3488	2927	4973	3871	4432	901	1144	960	163	160	145	148	197	186	1.34	1	0
Tb927.10.10400	Mitchondrial SSU ribosomal protein S11	1.56	1380	1094	1208	246	205	199	885	701	774	158	131	128	29	29	25	26	23	25	0.88	1	0
Tb927.10.10410	DNA replication licensing factor MCM8	1.54	2942	2252	2981	473	548	440	1910	1462	1936	307	356	286	63	60	64	50	61	55	1.06	1	0
Tb927.10.10420	monothiol glutaredoxin 2	1	537	438	597	139	101	96	537	438	597	139	101	96	18	18	20	23	17	19	0.77	1	0
Tb927.10.10430	hypothetical protein, conserved	1.55	922	817	1122	202	205	192	595	527	724	130	132	124	20	22	24	21	23	24	1	1	0
Tb927.10.10440	mitochondrial carrier protein, MCP8	2.03	1464	1055	1352	202	221	216	721	520	666	100	109	106	24	21	22	16	19	21	0.97	1	0
Tb927.10.10450	hypothetical protein	23.92	25503	21710	25945	6211	5050	4735	1066	908	1085	260	211	198	35	37	36	43	36	38	0.9	1	0
Tb927.10.10460	histone H2B	26.03	41523	34904	36776	11969	8483	8476	1595	1341	1413	460	326	326	52	55	46	76	56	63	0.91	1	0
Tb927.10.10470	histone H2B	16.88	41539	34920	36787	11974	8489	8480	2461	2069	2179	709	503	502	81	85	72	117	87	97	0.92	1	0
Tb927.10.10480	histone H2B	17.36	41536	34918	36787	11974	8489	8479	2393	2011	2119	690	489	488	79	83	70	113	84	95	0.91	1	0
Tb927.10.10490	histone H2B	16.86	41539	34920	36787	11974	8489	8480	2464	2071	2182	710	503	503	81	85	72	117	87	97	0.92	1	0
Tb927.10.1050	serine peptidase, Clan SC, Family S10 (CBP1)	3.89	13128	10255	11636	2372	2884	2459	3375	2636	2991	610	741	632	111	109	98	100	128	122	1.29	1	0
Tb927.10.10500	histone H2B	24.51	41526	34906	36776	11969	8483	8477	1694	1424	1500	488	346	346	56	59	49	80	60	67	0.92	1	0
Tb927.10.10510	histone H2B	16.43	41539	34920	36787	11974	8489	8480	2528	2125	2239	729	517	516	83	88	73	120	89	100	0.92	1	0
Tb927.10.10520	histone H2B	17.37	41536	34918	36787	11974	8489	8479	2391	2010	2118	689	489	488	78	83	70	113	84	95	0.91	1	0
Tb927.10.10530	histone H2B	16.45	41539	34920	36787	11974	8489	8480	2525	2123	2236	728	516	516	83	88	73	120	89	100	0.92	1	0
Tb927.10.10540	histone H2B	16.57	41539	34920	36787	11974	8489	8480	2507	2107	2220	723	512	512	82	87	73	119	88	99	0.91	1	0
Tb927.10.10550	histone H2B	16.31	41539	34920	36787	11974	8489	8480	2547	2141	2255	734	520	520	84	88	74	121	90	101	0.92	1	0
Tb927.10.10560	histone H2B	16.57	41539	34920	36787	11974	8489	8480	2507	2107	2220	723	512	512	82	87	73	119	88	99	0.91	1	0
Tb927.10.10570	histone H2B	24.18	41526	34906	36776	11969	8483	8477	1717	1444	1521	495	351	351	56	60	50	81	60	68	0.91	1	0
Tb927.10.10580	histone H2B	16.57	41539	34920	36787	11974	8489	8480	2507	2107	2220	723	512	512	82	87	73	119	88	99	0.91	1	0
Tb927.10.10590	histone H2B	10.72	41536	34916	36787	11975	8491	8479	3875	3257	3432	1117	792	791	127	134	113	184	136	153	0.91	1	0
Tb927.10.1060	Tric complex delta subunit (TCP-1-delta)	1	11982	10131	12386	2262	2052	1865	11982	10131	12386	2262	2052	1865	393	418	407	372	353	361	0.91	1	0
Tb927.10.10600	ARP2/3 complex 16kDa subunit, putative	2.05	1002	758	1278	162	138	141	489	370	623	79	67	69	16	15	20	13	12	13	0.71	1	0
Tb927.10.10610	protein tyrosine phosphatase, putative	1	1914	1635	1790	364	450	355	1914	1635	1790	364	450	355	63	67	59	60	78	69	1.3	1	0
Tb927.10.10620	hypothetical protein, conserved	1	1603	1443	1794	414	341	316	1603	1443	1794	414	341	316	53	59	59	68	59	61	0.92	1	0
Tb927.10.10630	hypothetical protein, conserved	1	1297	1174	1305	303	297	226	1297	1174	1305	303	297	226	43	48	43	50	51	44	1.09	1	0
Tb927.10.10640	hypothetical protein, conserved	1	502	399	580	89	85	81	502	399	580	89	85	81	16	16	19	15	15	16	0.86	1	0
Tb927.10.10650	NAR1 Cytosolic iron-sulphur cluster biogenesis, hydrogenase large subunit	1	1907	1525	1822	346	299	258	1907	1525	1822	346	299	258	63	63	60	57	51	50	0.86	1	0
Tb927.10.10660	hypothetical protein, unlikely	1	561	453	469	89	76	74	561	453	469	89	76	74	18	19	15	15	13	14	0.84	1	0
Tb927.10.10670	kinetoplastid-specific dual specificity phosphatase, putative	1	639	541	609	128	94	71	639	541	609	128	94	71	21	22	20	21	16	14	0.76	1	0
Tb927.10.10680	hypothetical protein, conserved	1.18	2971	2307	2979	528	486	495	2518	1955	2525	447	412	419	83	81	83	73	71	81	0.9	1	0
Tb927.10.10690	CEP19	1.97	1983	1560	1863	344	326	318	1007	792	946	175	165	161	33	33	31	29	28	31	0.92	1	0
Tb927.10.1070	CRK1 cdc2- like protein kinase	1	1689	1458	1771	359	325	298	1689	1458	1771	359	325	298	55	60	58	59	56	58	0.95	1	0
Tb927.10.10700	splicing factor Prp31	1.08	2075	1634	1951	385	364	338	1921	1513	1806	356	337	313	63	62	59	59	58	61	0.97	1	0
Tb927.10.10710	hypothetical protein, conserved	1	1864	1523	1929	352	351	296	1864	1523	1929	352	351	296	61	63	63	58	60	57	0.98	1	0
Tb927.10.10720	Tetraspanin family, putative	1	2262	1747	2076	419	487	461	2262	1747	2076	419	487	461	74	72	68	69	84	89	1.22	1	0
Tb927.10.10730	RNA Interference Factor 5 (RIF5)	1	7223	5668	7412	1367	1468	1225	7223	5668	7412	1367	1468	1225	237	234	243	225	253	237	1.08	1	0
Tb927.10.10740	hypothetical protein, conserved	1	2119	1798	2216	351	400	325	2119	1798	2216	351	400	325	70	74	73	58	69	63	1.05	1	0
Tb927.10.10750	metallo-peptidase, Clan MC, Family M14, putative	1.18	8010	6168	7921	1559	1423	1336	6788	5227	6713	1321	1206	1132	223	215	220	217	208	219	0.95	1	0
Tb927.10.10760	hypothetical protein	1.75	523	394	519	79	69	47	299	225	297	45	39	27	10	9	10	7	7	5	0.78	0	0
Tb927.10.10770	HAP2, membrane protein involved in gamete fusion	1.08	3441	2604	2747	561	543	454	3186	2411	2544	519	503	420	105	99	84	85	87	81	1.02	1	0
Tb927.10.10780	hypothetical protein, conserved	1	1544	1385	1474	320	282	286	1544	1385	1474	320	282	286	51	57	48	53	49	55	0.96	1	0
Tb927.10.10790	hypothetical protein	1	394	323	459	82	104	80	394	323	459	82	104	80	13	13	15	13	18	16	1.24	1	0
Tb927.10.1080	40S ribosomal protein S23	1.78	11862	9631	13973	2863	2356	2291	6664	5411	7850	1608	1324	1287	219	223	258	264	228	249	0.87	1	0
Tb927.10.10800	palmitoyl acyltransferase 2, TbPAT2	1	1657	1352	1757	355	347	283	1657	1352	1757	355	347	283	54	56	58	58	60	55	1.03	1	0
Tb927.10.10810	adenosine deaminase-like protein	1	2037	1570	2206	376	361	330	2037	1570	2206	376	361	330	67	65	72	62	62	64	0.92	1	0
Tb927.10.10820	hypothetical protein, conserved	1	1824	1398	1720	347	351	316	1824	1398	1720	347	351	316	60	58	56	57	60	61	1.05	1	0
Tb927.10.10830	RGG2, MRB complex component	1	1410	1290	1562	349	318	250	1410	1290	1562	349	318	250	46	53	51	57	55	48	1.01	1	0
Tb927.10.10840	Enriched in surface-labeled proteome protein 15 (ESP15)	1.15	3324	2682	3659	727	790	735	2890	2332	3182	632	687	639	95	96	104	104	118	124	1.13	1	0
Tb927.10.10850	AGO1	1.05	7471	6337	8340	1589	1427	1259	7115	6035	7943	1513	1359	1199	234	249	261	249	234	232	0.92	1	0
Tb927.10.10860	hypothetical protein, unlikely	1.58	161	164	201	43	23	37	102	104	127	27	15	23	3	4	4	4	3	4	0.67	0	0
Tb927.10.10870	protein kinase MAPKLK1	1	1748	1393	1966	350	341	286	1748	1393	1966	350	341	286	57	57	65	58	59	55	0.95	1	0
Tb927.10.10880	ATP-binding cassette sub-family F member 1, putative (ABCF1)	1	5989	4896	5760	1115	1004	931	5989	4896	5760	1115	1004	931	197	202	189	183	173	180	0.93	1	0
Tb927.10.10890	heat shock protein 83, HSP83	12.03	96655	82361	245530	47519	45187	37741	8034	6846	20410	3950	3756	3137	264	282	670	649	647	608	0.98	1	0
Tb927.10.1090	40S ribosomal protein S23	2.02	10734	8772	13034	2683	2248	2147	5314	4343	6452	1328	1113	1063	174	179	212	218	192	206	0.89	1	0
Tb927.10.10900	heat shock protein 83, HSP83	12.11	96655	82361	245530	47519	45187	37741	7981	6801	20275	3924	3731	3117	262	280	666	645	643	604	0.98	1	0
Tb927.10.10910	heat shock protein 83, HSP83	13.05	96650	82356	245516	47517	45185	37740	7406	6311	18813	3641	3462	2892	243	260	618	599	596	560	0.98	1	0
Tb927.10.10920	heat shock protein 83, HSP83	12.19	96637	82339	245460	47511	45175	37731	7928	6755	20136	3898	3706	3095	260	278	661	641	638	600	0.98	1	0
Tb927.10.10930	heat shock protein 83, HSP83	14.74	96630	82349	245486	47510	45182	37738	6556	5587	16654	3223	3065	2560	215	230	547	530	528	496	0.98	1	0
Tb927.10.10940	heat shock protein 83, HSP83	13.19	96654	82360	245521	47517	45186	37740	7328	6244	18614	3603	3426	2861	241	257	611	592	590	554	0.98	1	0
Tb927.10.10950	heat shock protein 83, HSP83	13.23	96659	82363	245531	47518	45186	37740	7306	6225	18559	3592	3415	2853	240	257	609	591	588	553	0.98	1	0
Tb927.10.10960	heat shock protein 83, HSP83	13.1	96659	82363	245531	47518	45186	37740	7379	6287	18743	3627	3449	2881	242	259	615	596	594	558	0.98	1	0
Tb927.10.10970	heat shock protein 83, HSP83	13.89	96630	82343	245432	47508	45173	37729	6957	5928	17670	3420	3252	2716	228	244	580	562	560	526	0.98	1	0
Tb927.10.10980	heat shock protein 83, HSP83	13.67	96645	82356	245508	47514	45183	37733	7070	6025	17960	3476	3305	2760	232	248	590	571	569	535	0.98	1	0
Tb927.10.10990	predicted WD40 repeat protein	1	3475	2777	3164	572	562	489	3475	2777	3164	572	562	489	114	114	104	94	97	95	0.97	1	0
Tb927.10.110	retrotransposon hot spot protein (RHS2, pseudogene), putative	62.81	32634	25181	29128	5094	4733	4457	520	401	464	81	75	71	17	17	15	13	13	14	0.9	1	0
Tb927.10.1100	60S ribosomal protein L9	1.7	18540	15429	20988	4539	3900	3452	10906	9076	12346	2670	2294	2031	358	374	405	439	395	394	0.93	1	0
Tb927.10.11000	4EIP2 homologue	1	1822	1386	1567	313	280	270	1822	1386	1567	313	280	270	60	57	51	51	48	52	0.93	1	0
Tb927.10.11010	hypothetical protein, conserved	1	1462	1139	1202	242	226	190	1462	1139	1202	242	226	190	48	47	39	40	39	37	0.98	1	0
Tb927.10.11020	DNA mismatch repair protein, putative,MSH2 (MSH2)	1.64	4973	4074	5020	984	904	805	3032	2484	3061	600	551	491	100	102	100	99	95	95	0.95	1	0
Tb927.10.11030	ATOM11 - POMP21	1	800	723	777	163	169	139	800	723	777	163	169	139	26	30	26	27	29	27	1.07	1	0
Tb927.10.11040	hypothetical protein, conserved	1	2008	1484	1785	402	322	288	2008	1484	1785	402	322	288	66	61	59	66	55	56	0.87	1	0
Tb927.10.11050	Mitchondrial LSU ribosomal protein	1	1031	781	910	215	165	150	1031	781	910	215	165	150	34	32	30	35	28	29	0.85	1	0
Tb927.10.11060	hypothetical protein, conserved	1	590	461	592	123	107	97	590	461	592	123	107	97	19	19	19	20	18	19	0.9	1	0
Tb927.10.11070	hypothetical protein, conserved	1.17	1456	1165	1431	260	221	245	1244	996	1223	222	189	209	41	41	40	36	33	41	0.86	1	0
Tb927.10.11080	paraflagellar rod protein,I17 antigen	6.21	47945	37937	54805	8736	9146	7810	7721	6109	8825	1407	1473	1258	253	252	290	231	254	244	0.97	1	0
Tb927.10.11090	hypothetical protein, conserved	1.38	4342	3283	3920	685	729	646	3146	2379	2841	496	528	468	103	98	93	82	91	91	1.03	1	0
Tb927.10.1110	Trypanosome-specific kinesin family 2	1	4680	3579	4362	884	822	699	4680	3579	4362	884	822	699	154	148	143	145	142	135	0.98	1	0
Tb927.10.11100	deoxyribodipyrimidine photolyase, putative,DNA repair enzyme, putative	1	3457	2638	3203	571	575	512	3457	2638	3203	571	575	512	113	109	105	94	99	99	0.99	1	0
Tb927.10.11110	hypothetical protein, conserved	1	5677	4531	5636	1081	1040	955	5677	4531	5636	1081	1040	955	186	187	185	178	179	185	0.98	1	0
Tb927.10.11120	hypothetical protein, conserved	1	1149	911	1127	190	205	170	1149	911	1127	190	205	170	38	38	37	31	35	33	1.01	1	0
Tb927.10.11130	SET domain containing protein, putative	1	5056	3965	4797	969	916	826	5056	3965	4797	969	916	826	166	163	157	159	158	160	1	1	0
Tb927.10.11140	hypothetical protein, conserved, kineto-specific, signal peptide	1	10244	7863	10894	2203	2829	2569	10244	7863	10894	2203	2829	2569	336	324	358	362	487	498	1.35	1	0
Tb927.10.11150	hypothetical protein, conserved, no domains	1	2534	2176	2623	511	511	445	2534	2176	2623	511	511	445	83	90	86	84	88	86	1.03	1	0
Tb927.10.11160	NFU2	1	1201	939	1241	241	224	167	1201	939	1241	241	224	167	39	39	41	40	39	32	0.95	1	0
Tb927.10.11170	hypothetical protein, conserved, P-loop, AAAdomain, NF-Zinc finger with Ring	1	9537	7443	10137	1929	1869	1672	9537	7443	10137	1929	1869	1672	313	307	333	317	322	324	0.99	1	0
Tb927.10.11180	E1-like ubiquitin-activating enzyme, putative,ATG7/CVT2/APG7, putative (ATG7)	1.27	2796	2071	2726	524	502	441	2202	1631	2146	413	395	347	72	67	70	68	68	67	0.98	1	0
Tb927.10.11190	tRNA-splicing ligase RtcB, putative	2.07	2778	2382	3182	555	564	508	1342	1151	1537	268	272	245	44	47	50	44	47	47	0.99	1	0
Tb927.10.1120	hypothetical protein, conserved	1.27	2935	2279	2451	492	482	444	2311	1794	1930	387	380	350	76	74	63	64	65	68	1.02	1	0
Tb927.10.11200	hypothetical protein, conserved	1	790	629	806	142	134	130	790	629	806	142	134	130	26	26	26	23	23	25	0.92	1	0
Tb927.10.11210	hypothetical protein, conserved	1	1583	1234	1688	295	291	254	1583	1234	1688	295	291	254	52	51	55	48	50	49	0.96	1	0
Tb927.10.11220	procyclic form surface glycoprotein (PSSA-2)	1	1471	1105	1304	284	260	261	1471	1105	1304	284	260	261	48	46	43	47	45	51	0.99	1	0
Tb927.10.11230	conserved, found in PRP19 pull-down	1.02	784	736	948	229	237	189	769	722	929	225	232	185	25	30	30	37	40	36	1.18	1	0
Tb927.10.11240	hypothetical protein, conserved	1.98	2713	2236	2470	442	462	410	1370	1129	1247	223	233	207	45	47	41	37	40	40	1.01	1	0
Tb927.10.11250	FAP172 homologue, molecular ruler for axonemes	1.55	8123	6693	8044	1340	1302	1209	5241	4318	5190	865	840	780	172	178	170	142	145	151	0.93	1	0
Tb927.10.11260	Mitchondrial SSU ribosomal protein	1.96	1372	1061	1200	218	212	183	700	541	612	111	108	93	23	22	20	18	19	18	0.97	1	0
Tb927.10.11270	RBP23	2.17	1324	1050	1115	212	116	124	610	484	514	98	53	57	20	20	17	16	9	11	0.53	1	3
Tb927.10.11280	hypothetical protein, T brucei brucei only	1	52	36	52	15	4	4	52	36	52	15	4	4	2	1	2	2	1	1	0.4	0	0
Tb927.10.11290	hypothetical protein, conserved	1.93	998	786	1007	157	135	133	517	407	522	81	70	69	17	17	17	13	12	13	0.77	1	0
Tb927.10.1130	dynein arm light chain, axonemal, putative	1.98	1474	1280	1466	345	302	265	744	646	740	174	153	134	24	27	24	29	26	26	0.96	1	0
Tb927.10.11300	paraflagellar rod protein PFC16	2.01	10354	9102	10898	1951	1808	1609	5151	4528	5422	971	900	800	169	187	178	160	155	155	0.91	1	0
Tb927.10.11310	intraflagellar transport protein IFT55/IFT57	1	5072	3933	4795	761	820	696	5072	3933	4795	761	820	696	166	162	157	125	141	135	1	1	0
Tb927.10.11320	hypothetical protein	1	759	636	795	113	113	92	759	636	795	113	113	92	25	26	26	19	19	18	0.83	1	0
Tb927.10.11330	EF-hand domain pair, putative	1	2379	1890	2474	479	449	435	2379	1890	2474	479	449	435	78	78	81	79	77	84	0.96	1	0
Tb927.10.11340	hypothetical protein, conserved	1.52	11917	10428	12599	2425	2198	2012	7840	6861	8289	1595	1446	1324	257	283	272	262	249	257	0.93	1	0
Tb927.10.11350	Mitchondrial LSU ribosomal protein	1	525	470	583	131	89	89	525	470	583	131	89	89	17	19	19	22	15	17	0.71	1	0
Tb927.10.11360	protein phosphatase 2A regulatory subunit, putative	1.79	2921	2207	2707	492	503	455	1632	1233	1512	275	281	254	54	51	50	45	48	49	1	1	0
Tb927.10.11370	hypothetical protein, conserved	2.03	786	563	704	165	131	115	387	277	347	81	65	57	13	11	11	13	11	11	0.88	1	0
Tb927.10.11380	hypothetical protein, conserved	1	1733	1325	1791	315	275	211	1733	1325	1791	315	275	211	57	55	59	52	47	41	0.84	1	0
Tb927.10.11390	60S ribosomal protein L6	1	12497	10535	15964	3605	2955	2663	12497	10535	15964	3605	2955	2663	410	434	524	593	509	516	0.91	1	0
Tb927.10.1140	epsilon tubulin (TUBE1)	1.97	1959	1530	1677	315	279	247	994	777	851	160	142	125	33	32	28	26	24	24	0.87	1	0
Tb927.10.11400	WD domain, G-beta repeat, putative	1	1719	1419	2022	354	371	279	1719	1419	2022	354	371	279	56	58	66	58	64	54	1.02	1	0
Tb927.10.11410	hypothetical protein, conserved	1	1896	1612	1829	365	359	359	1896	1612	1829	365	359	359	62	66	60	60	62	70	1.02	1	0
Tb927.10.11420	hypothetical protein, conserved	1	3516	2691	3644	674	699	610	3516	2691	3644	674	699	610	115	111	120	111	120	118	1.03	1	0
Tb927.10.11430	hypothetical protein, conserved	1	826	704	902	194	143	156	826	704	902	194	143	156	27	29	30	32	25	30	0.79	1	0
Tb927.10.11440	CYC5, CYC2-like cyclin, putative, G1 cyclin CycE4	1.62	7819	6019	7275	1523	1467	1333	4827	3715	4491	940	906	823	158	153	147	155	156	159	1.03	1	0
Tb927.10.11450	TFIIF-stimulated CTD phosphatase, putative	1	4955	3706	4320	813	843	729	4955	3706	4320	813	843	729	163	153	142	134	145	141	1.05	1	0
Tb927.10.11460	hypothetical protein	1	592	505	526	90	74	60	592	505	526	90	74	60	19	21	17	15	13	12	0.79	1	0
Tb927.10.11470	hypothetical protein, conserved	1.41	6458	4893	6588	1157	1089	1064	4580	3470	4672	821	772	755	150	143	153	135	133	146	0.92	1	0
Tb927.10.11480	hypothetical protein, conserved	1.15	2943	2317	2712	591	492	468	2559	2015	2358	514	428	407	84	83	77	85	74	79	0.91	1	0
Tb927.10.11490	hypothetical protein, unlikely	1.96	416	375	392	82	83	68	212	191	200	42	42	35	7	8	7	7	7	7	0.93	0	0
Tb927.10.1150	hypothetical protein, conserved	1.99	3749	2876	3445	670	606	486	1884	1445	1731	337	305	244	62	60	57	55	53	47	0.94	1	0
Tb927.10.11500	conserved protein	1.82	943	781	929	195	183	162	518	429	510	107	101	89	17	18	17	18	17	17	0.94	1	0
Tb927.10.11510	hypothetical protein, conserved	1	1760	1366	1692	284	311	248	1760	1366	1692	284	311	248	58	56	56	47	54	48	1.04	1	0
Tb927.10.11520	hypothetical protein, conserved	1	993	828	1024	224	205	169	993	828	1024	224	205	169	33	34	34	37	35	33	0.97	1	0
Tb927.10.11530	hypothetical protein, conserved	1	822	601	829	142	129	94	822	601	829	142	129	94	27	25	27	23	22	18	0.86	1	0
Tb927.10.11540	40S ribosomal protein S3	1.54	16780	13674	18211	4363	3563	3239	10896	8879	11825	2833	2314	2103	358	366	388	466	399	408	0.93	1	0
Tb927.10.11550	hypothetical protein, conserved	1	3326	2469	2824	550	497	486	3326	2469	2824	550	497	486	109	102	93	90	86	94	0.93	1	0
Tb927.10.11560	hypothetical protein, conserved	1	1197	990	1104	234	234	183	1197	990	1104	234	234	183	39	41	36	38	40	35	1.07	1	0
Tb927.10.11570	hypothetical protein, conserved	1	2784	2126	2642	458	468	413	2784	2126	2642	458	468	413	91	88	87	75	81	80	0.99	1	0
Tb927.10.11580	predicted WD40 repeat protein	1.44	10214	7978	9679	1867	1717	1571	7093	5540	6722	1297	1192	1091	233	228	221	213	205	211	0.94	1	0
Tb927.10.11590	nicotinate phosphoribosyltransferase, putative	1	3760	2886	3448	566	622	511	3760	2886	3448	566	622	511	123	119	113	93	107	99	1.03	1	0
Tb927.10.1160	NADH-ubiquinone oxidoreductase complex I subunit, putative	1.59	1134	862	1027	222	161	177	713	542	646	140	101	111	23	22	21	23	17	22	0.76	1	0
Tb927.10.11600	hypothetical protein, conserved	1.25	2081	1785	2136	373	360	324	1665	1428	1709	298	288	259	55	59	56	49	50	50	0.94	1	0
Tb927.10.11610	SKP1-like protein	1	691	556	758	140	130	120	691	556	758	140	130	120	23	23	25	23	22	23	0.9	1	0
Tb927.10.11620	calcium-transporting ATPase, putative	1.71	3426	2622	3585	619	609	531	2004	1533	2096	362	356	311	66	63	69	60	61	60	0.94	1	0
Tb927.10.11630	PSP1 C-terminal conserved region, putative	1.38	2001	1410	1713	317	304	299	1450	1022	1241	230	220	217	48	42	41	38	38	42	0.95	1	0
Tb927.10.11640	Protein prenyltransferase alpha subunit repeat, putative	1.78	2198	1695	1927	306	364	305	1235	952	1083	172	204	171	41	39	36	28	35	33	1.08	1	0
Tb927.10.11650	hypothetical protein, conserved	2.12	1064	777	1075	168	194	158	502	367	507	79	92	75	16	15	17	13	16	15	1.03	1	0
Tb927.10.11660	hypothetical protein, conserved	1.98	2359	1833	2233	481	371	361	1191	926	1128	243	187	182	39	38	37	40	32	35	0.82	1	0
Tb927.10.11670	hypothetical protein, conserved	1	978	740	994	175	212	164	978	740	994	175	212	164	32	31	33	29	37	32	1.17	1	0
Tb927.10.11680	VCL2 Voltage-gated Chloride channel Like	1	5424	4131	5107	952	1055	919	5424	4131	5107	952	1055	919	178	170	168	157	182	178	1.12	1	0
Tb927.10.11690	YEATS family, putative	1	1956	1500	1791	353	341	269	1956	1500	1791	353	341	269	64	62	59	58	59	52	1	1	0
Tb927.10.1170	intraflagellar transport protein IFT172	1.77	27088	21910	27050	4843	4903	4299	15304	12379	15282	2736	2770	2429	502	510	502	450	477	471	1	1	0
Tb927.10.11700	guanylate kinase, putative	1	2407	2084	2263	404	379	352	2407	2084	2263	404	379	352	79	86	74	66	65	68	0.92	1	0
Tb927.10.11710	hypothetical protein	1	1739	1352	1451	220	237	194	1739	1352	1451	220	237	194	57	56	48	36	41	38	0.96	1	0
Tb927.10.11720	CW-type Zinc Finger, putative	1	3782	2993	3456	665	649	524	3782	2993	3456	665	649	524	124	123	113	109	112	102	1	1	0
Tb927.10.11730	ZC3H33	1	4213	3297	3693	710	649	661	4213	3297	3693	710	649	661	138	136	121	117	112	128	0.94	1	0
Tb927.10.11740	hypothetical protein, unlikely	1	380	292	347	61	61	39	380	292	347	61	61	39	12	12	11	10	11	8	1	1	0
Tb927.10.11750	hypothetical protein, conserved	1	746	697	866	183	180	154	746	697	866	183	180	154	24	29	28	30	31	30	1.05	1	0
Tb927.10.11760	PUF6	1	8091	6001	6798	1371	1404	1132	8091	6001	6798	1371	1404	1132	266	247	223	225	242	219	1.08	1	0
Tb927.10.11770	hypothetical protein, conserved	1	1057	802	863	137	136	120	1057	802	863	137	136	120	35	33	28	23	23	23	0.88	1	0
Tb927.10.11780	hypothetical protein, conserved	1	8263	7342	8633	1672	1490	1290	8263	7342	8633	1672	1490	1290	271	303	283	275	257	250	0.92	1	0
Tb927.10.11790	hypothetical protein, unlikely	1	332	258	275	41	34	38	332	258	275	41	34	38	11	11	9	7	6	7	0.71	1	0
Tb927.10.1180	hypothetical protein, conserved	1.48	1802	1470	1833	360	335	291	1218	993	1239	243	226	197	40	41	41	40	39	38	0.95	1	0
Tb927.10.11800	33 kDa inner dynein arm light chain, axonemal, putative,dynein light chain, putative	1.42	1780	1363	1669	323	264	259	1254	960	1175	227	186	182	41	40	39	37	32	35	0.83	1	0
Tb927.10.11810	hypothetical protein, conserved	1.12	2319	1846	2224	376	358	319	2071	1648	1986	336	320	285	68	68	65	55	55	55	0.91	1	0
Tb927.10.11820	Mitchondrial SSU ribosomal protein	1	984	824	1013	175	160	158	984	824	1013	175	160	158	32	34	33	29	28	31	0.89	1	0
Tb927.10.11830	hypothetical protein, conserved	1	1692	1226	1459	262	273	238	1692	1226	1459	262	273	238	56	51	48	43	47	46	1.02	1	0
Tb927.10.11840	WD domain, G-beta repeat, putative	1.29	1769	1407	1816	332	303	264	1371	1091	1408	257	235	205	45	45	46	42	40	40	0.9	1	0
Tb927.10.11850	WD domain, G-beta repeat, putative	1.76	5465	4805	5173	1169	915	844	3105	2730	2939	664	520	480	102	113	96	109	90	93	0.87	1	0
Tb927.10.11860	Cornifin (SPRR) family, putative	5.38	9045	8394	7877	2037	1943	1699	1681	1560	1464	379	361	316	55	64	48	62	62	61	1.12	1	0
Tb927.10.11870	GRBC5 mitochondrial RNA binding protein (MRB11870)	1	1896	1476	1813	293	293	269	1896	1476	1813	293	293	269	62	61	60	48	50	52	0.92	1	0
Tb927.10.11880	hypothetical protein, conserved	1	4053	3164	3773	767	677	672	4053	3164	3773	767	677	672	133	130	124	126	117	130	0.93	1	0
Tb927.10.11890	hypothetical protein, conserved	1.81	1552	1256	1534	272	288	294	857	694	848	150	159	162	28	29	28	25	27	31	1	1	0
Tb927.10.1190	hypothetical protein, conserved	1.18	2706	2096	2454	456	443	406	2293	1776	2080	386	375	344	75	73	68	63	65	67	0.98	1	0
Tb927.10.11900	MIC20	1.95	915	717	915	139	135	132	469	368	469	71	69	68	15	15	15	12	12	13	0.86	1	0
Tb927.10.11910	major facilitator superfamily, putative	1.31	2417	1928	2314	369	410	386	1845	1472	1766	282	313	295	61	61	58	46	54	57	1.03	1	0
Tb927.10.11920	hypothetical protein, conserved, no clear yeast or human matches	1	663	526	718	144	139	143	663	526	718	144	139	143	22	22	24	24	24	28	0.98	1	0
Tb927.10.11930	beta-D-hydroxybutyrate dehydrogenase	1	1784	1362	1691	251	269	220	1784	1362	1691	251	269	220	59	56	56	41	46	43	0.94	1	0
Tb927.10.11940	ABC1 protein, putative	1	1605	1356	1758	311	323	371	1605	1356	1758	311	323	371	53	56	58	51	56	72	1.02	1	0
Tb927.10.11950	Putative Cwc15, copurified with splicing complex	1	877	847	923	152	150	160	877	847	923	152	150	160	29	35	30	25	26	31	0.93	1	0
Tb927.10.11960	hypothetical protein, conserved	1	1351	1214	1334	226	224	209	1351	1214	1334	226	224	209	44	50	44	37	39	41	0.95	1	0
Tb927.10.11970	glutamine aminotransferase (GlnAT)	1	1387	1001	1228	246	225	205	1387	1001	1228	246	225	205	46	41	40	40	39	40	0.96	1	0
Tb927.10.11980	QA-SNARE protein putative	1	623	548	651	138	147	117	623	548	651	138	147	117	20	23	21	23	25	23	1.11	1	0
Tb927.10.11990	RNA-binding protein NIP7	1	1338	992	1308	217	136	144	1338	992	1308	217	136	144	44	41	43	36	23	28	0.58	1	3
Tb927.10.120	hypothetical protein	13.87	1459	1354	1375	380	356	328	105	98	99	27	26	24	3	4	3	4	4	5	1	0	0
Tb927.10.1200	Programmed cell death protein 2, C-terminal putative domain containing protein, putative	2.18	1834	1501	1715	317	313	288	841	689	787	145	144	132	28	28	26	24	25	26	0.98	1	0
Tb927.10.12000	iron-sulfur cluster assembly protein, ISD11, needed foraconitatase, fumarase & thiolation of mitochodrial and cytosolic tRNA	1	804	582	774	106	106	82	804	582	774	106	106	82	26	24	25	17	18	16	0.84	1	0
Tb927.10.12010	hypothetical protein, conserved	1	2318	1978	2708	488	445	402	2318	1978	2708	488	445	402	76	82	89	80	77	78	0.91	1	0
Tb927.10.12020	recA bacterial DNA recombination protein, putative	1.22	1424	1079	1376	247	257	229	1167	884	1128	202	211	188	38	36	37	33	36	36	1.01	1	0
Tb927.10.12030	hypothetical protein, conserved	1.74	2277	1724	2120	354	393	318	1309	991	1218	203	226	183	43	41	40	33	39	35	1.05	1	0
Tb927.10.12040	protein kinase, putative,mitogen-activated protein kinase 11, putative	1.94	3721	2910	3213	543	534	505	1918	1500	1656	280	275	260	63	62	54	46	47	50	0.93	1	0
Tb927.10.12050	Mitchondrial LSU ribosomal protein	1	945	708	876	208	169	172	945	708	876	208	169	172	31	29	29	34	29	33	0.91	1	0
Tb927.10.12060	hypothetical protein, conserved	1.19	5944	4201	5093	983	959	840	4995	3530	4280	826	806	706	164	145	140	136	139	137	1	1	0
Tb927.10.12070	hypothetical protein	1.89	800	575	632	97	116	90	423	304	334	51	61	48	14	13	11	8	11	9	1.1	1	0
Tb927.10.12080	hypothetical protein, conserved	1	878	675	821	164	209	172	878	675	821	164	209	172	29	28	27	27	36	33	1.31	1	0
Tb927.10.12090	RBP7A	1.25	1584	1449	1490	230	320	249	1267	1159	1192	184	256	199	42	48	39	30	44	39	1.26	1	0
Tb927.10.1210	katanin, putative	1.4	4468	3348	3820	620	635	538	3191	2391	2729	443	454	384	105	99	90	73	78	74	0.95	1	0
Tb927.10.12100	RBP7B	2.22	1736	1586	1742	250	338	263	782	714	785	113	152	118	26	29	26	19	26	23	1.13	1	0
Tb927.10.12110	hypothetical protein, conserved	1	476	389	536	96	86	94	476	389	536	96	86	94	16	16	18	16	15	18	0.86	1	0
Tb927.10.12120	hypothetical protein, conserved, TPR domain	1.38	13805	10668	13375	2667	2471	2250	10004	7730	9692	1933	1791	1630	328	319	318	318	308	316	0.97	1	0
Tb927.10.12130	Ubiquitin family, putative	1.43	2696	2149	2356	475	422	350	1885	1503	1648	332	295	245	62	62	54	55	51	47	0.93	1	0
Tb927.10.12140	hypothetical protein, conserved	1	3236	2628	3252	596	676	630	3236	2628	3252	596	676	630	106	108	107	98	116	122	1.13	1	0
Tb927.10.12150	hypothetical protein, conserved	1	882	664	806	128	141	129	882	664	806	128	141	129	29	27	26	21	24	25	1	1	0
Tb927.10.12160	hypothetical protein, conserved	1	1222	888	1057	212	220	162	1222	888	1057	212	220	162	40	37	35	35	38	31	1.07	1	0
Tb927.10.12170	RAB-interacting protein, putative	1	1060	796	1017	207	205	212	1060	796	1017	207	205	212	35	33	33	34	35	41	1.03	1	0
Tb927.10.12180	hypothetical protein, conserved	1	2465	1960	2489	452	433	368	2465	1960	2489	452	433	368	81	81	82	74	75	71	0.96	1	0
Tb927.10.12190	RAB-interacting protein, putative	1	813	698	915	161	145	143	813	698	915	161	145	143	27	29	30	26	25	28	0.88	1	0
Tb927.10.1220	hypothetical protein	1.85	88	69	87	22	18	8	48	37	47	12	10	4	2	2	2	2	2	1	0.8	0	0
Tb927.10.12200	hypothetical protein, conserved	1	970	763	984	170	183	173	970	763	984	170	183	173	32	31	32	28	32	34	1.05	1	0
Tb927.10.12210	ribulose-5-phosphate 3-epimerase, putative	1	766	544	682	137	130	123	766	544	682	137	130	123	25	22	22	23	22	24	0.96	1	0
Tb927.10.12220	hypothetical protein, conserved	1	1339	1075	1412	243	231	193	1339	1075	1412	243	231	193	44	44	46	40	40	37	0.92	1	0
Tb927.10.12230	hypothetical protein, conserved	1	2162	1698	2231	404	351	336	2162	1698	2231	404	351	336	71	70	73	66	60	65	0.86	1	0
Tb927.10.12240	short-chain dehydrogenase, putative	1	1417	950	1272	225	259	204	1417	950	1272	225	259	204	47	39	42	37	45	40	1.13	1	0
Tb927.10.12250	hypothetical protein, conserved	1	2470	1836	2427	411	409	385	2470	1836	2427	411	409	385	81	76	80	68	70	75	0.94	1	0
Tb927.10.12260	Zn-dependent peptidase (M20/M25/M40 family)	1	2086	1497	1817	393	460	370	2086	1497	1817	393	460	370	68	62	60	65	79	72	1.25	1	0
Tb927.10.12270	methyltransferase domain containing protein, putative	2.07	637	491	758	156	149	143	308	237	366	75	72	69	10	10	12	12	12	13	0.96	1	0
Tb927.10.12280	hypothetical protein	1.6	260	178	201	44	46	26	163	111	126	28	29	16	5	5	4	5	5	3	1	0	0
Tb927.10.12290	UDP-Gal or UDP-GlcNAc-dependent glycosyltransferase, putative	1.22	4182	3230	3904	761	806	687	3428	2648	3200	624	661	563	113	109	105	103	114	109	1.09	1	0
Tb927.10.1230	hypothetical protein, conserved	1	3742	2817	3811	658	772	613	3742	2817	3811	658	772	613	123	116	125	108	133	119	1.14	1	0
Tb927.10.12300	hypothetical protein, conserved	1	523	433	469	82	82	84	523	433	469	82	82	84	17	18	15	13	14	16	0.97	1	0
Tb927.10.12310	helicase-like protein	1	5417	4369	5699	962	950	864	5417	4369	5699	962	950	864	178	180	187	158	164	167	0.95	1	0
Tb927.10.12320	hypothetical protein	1	1334	1070	1283	267	249	207	1334	1070	1283	267	249	207	44	44	42	44	43	40	0.99	1	0
Tb927.10.12330	ZC3H34	1.64	2456	2091	2497	522	418	322	1498	1275	1523	318	255	196	49	53	50	52	44	38	0.85	1	0
Tb927.10.12340	hypothetical protein, conserved	1.76	2007	1512	1918	334	330	279	1140	859	1090	190	188	159	37	35	36	31	32	31	0.94	1	0
Tb927.10.12350	hypothetical protein, conserved	1.36	972	656	832	159	130	117	715	482	612	117	96	86	23	20	20	19	17	17	0.85	1	0
Tb927.10.12360	hypothetical protein, conserved	1	1226	930	978	190	179	148	1226	930	978	190	179	148	40	38	32	31	31	29	0.97	1	0
Tb927.10.12370	gamma-glutamylcysteine synthetase (GCS)	1	2814	2037	2400	443	446	401	2814	2037	2400	443	446	401	92	84	79	73	77	78	1.01	1	0
Tb927.10.12380	chaperone DNAj, putative, J42	1	2739	2295	2969	475	487	451	2739	2295	2969	475	487	451	90	95	97	78	84	87	0.95	1	0
Tb927.10.12390	hypothetical protein, conserved	1	1671	1429	1650	302	310	260	1671	1429	1650	302	310	260	55	59	54	50	53	50	1.01	1	0
Tb927.10.1240	hypothetical protein, conserved	1	1111	818	1033	202	197	174	1111	818	1033	202	197	174	36	34	34	33	34	34	1	1	0
Tb927.10.12400	membrane transporter protein, putative	1	957	756	1011	212	185	177	957	756	1011	212	185	177	31	31	33	35	32	34	0.93	1	0
Tb927.10.12410	hypothetical protein, conserved	1	1496	1302	1788	275	261	263	1496	1302	1788	275	261	263	49	54	59	45	45	51	0.86	1	0
Tb927.10.12420	predicted S. cerevisiae Got1 homologue, predicted to be involved in ER-Golgi transport	1	623	537	780	148	196	137	623	537	780	148	196	137	20	22	26	24	34	27	1.33	1	0
Tb927.10.12430	Noc2p family, putative	1	4811	3991	4478	861	626	560	4811	3991	4478	861	626	560	158	164	147	142	108	109	0.74	1	0
Tb927.10.12440	kinesin, putative	1.27	2852	2340	2831	472	422	373	2246	1843	2229	372	332	294	74	76	73	61	57	57	0.84	1	0
Tb927.10.12450	SNARE 2.1 of T cruzi	1.28	970	793	966	179	156	156	758	620	755	140	122	122	25	26	25	23	21	24	0.86	1	0
Tb927.10.12460	Zinc finger, C3HC4 type (RING finger), putative	1	1318	1089	1087	253	238	200	1318	1089	1087	253	238	200	43	45	36	42	41	39	1.04	1	0
Tb927.10.12470	hypothetical protein, conserved	1	2481	1989	2388	430	396	370	2481	1989	2388	430	396	370	81	82	78	71	68	72	0.91	1	0
Tb927.10.12480	UDP-xylose and UDP-N-acetyl glucosamine transporter family	1	1795	1335	1836	350	349	315	1795	1335	1836	350	349	315	59	55	60	58	60	61	1.01	1	0
Tb927.10.12490	kinesin, putative	1	5931	4865	5944	1114	1006	1008	5931	4865	5944	1114	1006	1008	195	201	195	183	173	195	0.91	1	0
Tb927.10.1250	MCP3, Ybak homogue, deacylation of misaminoacylated tRNA Pro	1	2301	1870	2162	399	421	344	2301	1870	2162	399	421	344	76	77	71	66	73	67	1.06	1	0
Tb927.10.12500	P-type H -ATPase, putative	3.08	15325	12850	19159	3886	4418	3803	4976	4172	6220	1262	1434	1235	163	172	204	207	247	239	1.2	1	0
Tb927.10.12510	P-type H -ATPase, putative	2.53	16261	13726	20805	4196	4802	4133	6427	5425	8223	1658	1898	1634	211	224	270	273	327	317	1.2	1	0
Tb927.10.12520	hypothetical protein, conserved	1	5626	4245	5383	936	865	864	5626	4245	5383	936	865	864	185	175	177	154	149	167	0.9	1	0
Tb927.10.12530	chaperone DNAj, putative, J13	1	1119	817	1129	196	201	169	1119	817	1129	196	201	169	37	34	37	32	35	33	1	1	0
Tb927.10.12540	electron transfer protein, putative,ferredoxin, putative	1	1216	946	1088	215	170	163	1216	946	1088	215	170	163	40	39	36	35	29	32	0.81	1	0
Tb927.10.12550	hypothetical protein, conserved	1	795	604	845	140	147	118	795	604	845	140	147	118	26	25	28	23	25	23	0.96	1	0
Tb927.10.12560	hypothetical protein	1	17	7	20	4	4	3	17	7	20	4	4	3	1	0	1	1	1	1		0	0
Tb927.10.12570	hypothetical protein	2.07	138	103	138	19	16	16	67	50	67	9	8	8	2	2	2	1	1	2	0.5	0	0
Tb927.10.12580	hypothetical protein	1.01	103	85	102	19	18	16	102	84	101	19	18	16	3	3	3	3	3	3	0.86	0	0
Tb927.10.12590	hypothetical protein, conserved	1.51	8781	9606	13092	3148	2838	2437	5815	6362	8670	2085	1879	1614	191	262	285	343	324	313	1.03	1	0
Tb927.10.1260	aspartyl-tRNA synthetase, putative	1	2216	1604	2096	355	345	341	2216	1604	2096	355	345	341	73	66	69	58	59	66	0.92	1	0
Tb927.10.12600	HEN1 methyltransferase siRNA modification	1	3177	2433	3089	551	518	463	3177	2433	3089	551	518	463	104	100	101	91	89	90	0.92	1	0
Tb927.10.12610	hypothetical protein	1	705	536	655	97	93	77	705	536	655	97	93	77	23	22	22	16	16	15	0.82	1	0
Tb927.10.12620	Golvesin-2 vacuolar protein	1	4892	3952	4575	875	836	729	4892	3952	4575	875	836	729	161	163	150	144	144	141	0.98	1	0
Tb927.10.12630	hypothetical protein, conserved	1	1080	805	1094	193	168	159	1080	805	1094	193	168	159	35	33	36	32	29	31	0.84	1	0
Tb927.10.12640	chaperone DNAj, putative, J37	1	3238	2482	2873	553	526	477	3238	2482	2873	553	526	477	106	102	94	91	91	92	0.98	1	0
Tb927.10.12650	hypothetical protein, salivarian tryp only, 3'-UTR of 12660?	1	2564	1757	1842	194	282	244	2564	1757	1842	194	282	244	84	72	60	32	49	47	1.05	1	0
Tb927.10.12660	PUF2	1	11478	8437	8322	1641	1805	1425	11478	8437	8322	1641	1805	1425	377	348	273	270	311	276	1.14	1	0
Tb927.10.12670	Hypothetical conserved in trypanosoma, Leish match not syntenic	1	5542	4348	5590	1108	1053	935	5542	4348	5590	1108	1053	935	182	179	183	182	181	181	0.99	1	0
Tb927.10.12680	60S ribosomal protein L34	2.08	16440	13431	16768	4875	3704	3408	7904	6457	8062	2344	1781	1638	259	266	265	385	307	317	0.94	1	0
Tb927.10.12690	hypothetical protein, conserved	1	1588	1226	1479	277	273	248	1588	1226	1479	277	273	248	52	51	49	46	47	48	0.98	1	0
Tb927.10.1270	mismatch repair protein MSH4	1.21	4126	3074	3307	739	626	646	3410	2540	2733	611	517	534	112	105	90	100	89	103	0.93	1	0
Tb927.10.12700	pyruvate dehydrogenase E1 alpha subunit, putative	1	5259	3900	4148	727	700	661	5259	3900	4148	727	700	661	173	161	136	120	121	128	0.94	1	0
Tb927.10.12710	heat shock protein, HSP110	1	28343	23313	48390	8425	9956	8369	28343	23313	48390	8425	9956	8369	930	961	1588	1385	1715	1622	1.15	1	0
Tb927.10.12720	BOH1, hook complex protein, resemblance to myosin	1	4602	3687	4174	808	724	722	4602	3687	4174	808	724	722	151	152	137	133	125	140	0.92	1	0
Tb927.10.12730	hypothetical protein	1	858	557	677	84	82	62	858	557	677	84	82	62	28	23	22	14	14	12	0.76	1	0
Tb927.10.12740	ZC3H35	1.01	2800	1945	2386	466	410	334	2772	1926	2362	461	406	331	91	79	78	76	70	64	0.9	1	0
Tb927.10.12750	hypothetical protein	1	306	187	267	20	18	23	306	187	267	20	18	23	10	8	9	3	3	4	0.46	0	2
Tb927.10.12760	ZC3H36	1.04	794	625	763	169	171	133	763	601	734	163	164	128	25	25	24	27	28	25	1.08	1	0
Tb927.10.12770	hypothetical protein	1	169	122	136	18	15	14	169	122	136	18	15	14	6	5	4	3	3	3	0.75	0	0
Tb927.10.12780	ZC3H37	5.63	3943	2946	3147	615	578	438	700	523	559	109	103	78	23	22	18	18	18	15	0.97	1	0
Tb927.10.12790	3UTR of ZC3H38	1	2246	1471	1533	177	196	177	2246	1471	1533	177	196	177	74	61	50	29	34	34	0.85	1	0
Tb927.10.1280	Domain of unknown function (DUF4499), putative	1.71	1384	1127	1126	252	236	218	809	659	658	147	138	127	27	27	22	24	24	25	1.02	1	0
Tb927.10.12800	ZC3H38	2.8	5219	3909	4269	808	774	598	1864	1396	1525	289	276	214	61	58	50	48	48	41	0.97	1	0
Tb927.10.12810	cholinephosphate cytidylyltransferase A, putative	1	4333	3671	4696	718	847	685	4333	3671	4696	718	847	685	142	151	154	118	146	133	1.07	1	0
Tb927.10.12820	Cysteine proteinase domains by interpro but not NCBI	1.01	18684	15224	17429	3676	3072	2679	18499	15073	17256	3640	3042	2652	607	621	566	598	524	514	0.9	1	0
Tb927.10.12830	acetyltransferase, putative	1	995	761	1037	170	139	136	995	761	1037	170	139	136	33	31	34	28	24	26	0.76	1	0
Tb927.10.12840	mitochondrial carrier protein, MCP12, dicarboxylates & tricarboxylates	1	2447	1975	2680	474	560	472	2447	1975	2680	474	560	472	80	81	88	78	96	91	1.15	1	0
Tb927.10.12850	TRF ttaggg binding factor, telomere maintenance	1	35658	22931	16518	4004	3180	2999	35658	22931	16518	4004	3180	2999	1171	945	542	658	548	581	0.91	1	0
Tb927.10.12860	pre-RNA processing PIH1/Nop17, putative	1	2766	2382	2783	546	511	485	2766	2382	2783	546	511	485	91	98	91	90	88	94	0.97	1	0
Tb927.10.12870	BBP120	1	6430	4933	5774	1131	1069	969	6430	4933	5774	1131	1069	969	211	203	190	186	184	188	0.98	1	0
Tb927.10.12880	SET domain containing protein, putative	1	1711	1282	1663	249	289	232	1711	1282	1663	249	289	232	56	53	55	41	50	45	1.03	1	0
Tb927.10.12890	bifunctional aminoacyl-tRNA synthetase, putative	1.01	13593	11227	12888	2364	2053	1907	13458	11116	12760	2341	2033	1888	442	458	419	385	350	366	0.87	1	0
Tb927.10.1290	hypothetical protein, conserved	1.89	296	280	302	74	68	47	157	148	160	39	36	25	5	6	5	6	6	5	1	0	0
Tb927.10.12900	Complex 1 protein (LYR family), putative	1.84	1041	831	962	157	173	171	566	452	523	85	94	93	19	19	17	14	16	18	1	1	0
Tb927.10.12910	hypothetical protein, conserved	1.51	4873	3758	4572	884	834	762	3227	2489	3028	585	552	505	106	103	99	96	95	98	0.97	1	0
Tb927.10.12920	FAZ18 flagellar attachment zone protein	1	5017	4235	5461	1025	973	825	5017	4235	5461	1025	973	825	165	175	179	169	168	160	0.96	1	0
Tb927.10.12930	hypothetical protein, conservedn no domains or good BLASTp hits	1	1802	1353	1617	293	274	278	1802	1353	1617	293	274	278	59	56	53	48	47	54	0.92	1	0
Tb927.10.12940	predicted zinc finger protein	1.72	3697	2822	3159	598	575	484	2149	1641	1837	348	334	281	71	68	60	57	58	54	0.98	1	0
Tb927.10.12950	BBP110	1.1	5846	4814	5574	1189	1061	997	5315	4376	5067	1081	965	906	174	180	166	178	166	176	0.96	1	0
Tb927.10.12960	ras-related protein rab-5,small GTPase, putative (RAB5A)	1	4254	3197	3644	601	595	572	4254	3197	3644	601	595	572	140	132	120	99	102	111	0.93	1	0
Tb927.10.12970	AN1-like zinc finger, putative	1	787	704	881	153	163	158	787	704	881	153	163	158	26	29	29	25	28	31	1.02	1	0
Tb927.10.12980	methyltransferase, NOL1/NOP2/sun family	1	4650	3691	5008	794	704	695	4650	3691	5008	794	704	695	153	152	164	131	121	135	0.82	1	0
Tb927.10.12990	hypothetical protein, conserved,predicted ankyrin repeat family protein	1	2023	1645	2145	396	380	362	2023	1645	2145	396	380	362	66	68	70	65	65	70	0.96	1	0
Tb927.10.130	hypothetical protein	6.1	1035	790	1076	141	163	133	170	130	176	23	27	22	6	5	6	4	5	4	0.91	0	0
Tb927.10.1300	hypothetical protein, conserved, no homologues	1	941	709	888	181	146	137	941	709	888	181	146	137	31	29	29	30	25	27	0.83	1	0
Tb927.10.13000	cAMP phosphodiesterase A, putative (PDEA)	1	2841	2158	2480	441	381	368	2841	2158	2480	441	381	368	93	89	81	73	66	71	0.85	1	0
Tb927.10.13010	protein kinase A catalytic subunit 3(PKAC3)	1.94	2257	1892	2283	387	315	294	1163	975	1177	199	162	152	38	40	39	33	28	29	0.77	1	0
Tb927.10.13020	vacuolar protein sorting complex subunit, putative,Vps16, putative	1.08	4920	3840	4950	702	670	647	4556	3556	4583	650	620	599	150	147	150	107	107	116	0.83	1	0
Tb927.10.13030	calpain-like cysteine peptidase, putative,cysteine peptidase, Clan CA, family C2, putative	1	2436	1839	2406	361	344	290	2436	1839	2406	361	344	290	80	76	79	59	59	56	0.85	1	0
Tb927.10.13040	ACP4, GRESAG 4-like	1.03	3448	2653	3618	718	774	615	3348	2576	3513	697	751	597	110	106	115	115	129	116	1.12	1	0
Tb927.10.13050	hypothetical protein, unlikely	1	125	104	134	15	14	14	125	104	134	15	14	14	4	4	4	2	2	3	0.57	0	0
Tb927.10.13060	hypothetical protein	1.36	250	156	218	39	20	36	184	115	160	29	15	26	6	5	5	5	3	5	0.55	0	0
Tb927.10.13070	hypothetical protein, conserved	1.23	6816	5369	6195	1082	1183	1001	5541	4365	5037	880	962	814	182	180	165	145	166	158	1.07	1	0
Tb927.10.13080	hypothetical protein	1.57	539	378	486	64	79	77	343	241	310	41	50	49	11	10	10	7	9	9	1	1	0
Tb927.10.13090	PhoD-like phosphatase, putative	1	3283	2564	2848	600	699	570	3283	2564	2848	600	699	570	108	106	93	99	120	110	1.24	1	0
Tb927.10.1310	Domain of unknown function (DUF4042), putative	1	3554	2897	3636	699	735	633	3554	2897	3636	699	735	633	117	119	119	115	127	123	1.08	1	0
Tb927.10.13100	CIF3 cytokinesis initiation factor	1	2241	2102	2799	518	563	475	2241	2102	2799	518	563	475	74	87	92	85	97	92	1.09	1	0
Tb927.10.13110	dynein light chain, putative,dynein light chain 2B, redicted dynein modulator,roadblock/LC7 family member	1	2088	1562	2095	247	284	256	2088	1562	2095	247	284	256	69	64	69	41	49	50	0.88	1	0
Tb927.10.13120	mitochondrial carrier protein, MCP14 possible proline transporter	1	1332	1148	1317	239	232	214	1332	1148	1317	239	232	214	44	47	43	39	40	41	0.96	1	0
Tb927.10.13130	UTP-glucose-1-phosphate uridylyltransferase 2, putative	1	1506	1206	1355	253	218	208	1506	1206	1355	253	218	208	49	50	44	42	38	40	0.87	1	0
Tb927.10.13140	hypothetical protein, conserved	1	815	841	988	199	154	183	815	841	988	199	154	183	27	35	32	33	27	35	0.82	1	0
Tb927.10.13150	hypothetical protein, conserved	1	3075	2429	2725	454	469	438	3075	2429	2725	454	469	438	101	100	89	75	81	85	0.98	1	0
Tb927.10.13160	mannosyltransferase-II (MT-II)	1.43	2069	1507	2256	335	403	297	1447	1054	1578	234	282	208	47	43	52	38	49	40	1.08	1	0
Tb927.10.13170	hypothetical protein, conserved	1.82	1133	846	935	222	163	185	623	465	514	122	90	102	20	19	17	20	16	20	0.84	1	0
Tb927.10.13180	Nrap protein, putative	1.16	7852	6255	7776	1431	1092	1002	6769	5392	6703	1234	941	864	222	222	220	203	162	167	0.76	1	0
Tb927.10.13190	ARP2/3 complex subunit, putative	1	1603	1344	1506	280	297	238	1603	1344	1506	280	297	238	53	55	49	46	51	46	1.06	1	0
Tb927.10.1320	hypothetical protein, conserved	1	2770	2180	2587	445	489	432	2770	2180	2587	445	489	432	91	90	85	73	84	84	1.06	1	0
Tb927.10.13200	PPR4	1.42	3632	2777	3396	654	624	580	2558	1956	2392	461	439	408	84	81	79	76	76	79	0.97	1	0
Tb927.10.13210	dolichyl-P-Man:GDP-ManGlcNAc2-PP-dolichyl beta-1,4-mannosyltransferase, putative	1.76	3259	2505	3299	593	632	514	1852	1423	1874	337	359	292	61	59	62	55	62	57	1.05	1	0
Tb927.10.13220	cyclophilin type peptidyl-prolyl cis-trans isomerase, putative (PPIase)	1.07	4442	3307	4172	719	717	616	4151	3091	3899	672	670	576	136	127	128	110	115	112	0.96	1	0
Tb927.10.13230	hypothetical protein, conserved	1	1533	1129	1400	273	261	207	1533	1129	1400	273	261	207	50	47	46	45	45	40	0.98	1	0
Tb927.10.13240	hypothetical protein, conserved	1	3049	2343	2763	475	482	427	3049	2343	2763	475	482	427	100	97	91	78	83	83	0.98	1	0
Tb927.10.13250	hypothetical protein, conserved	1	11427	8688	10367	1963	1992	1689	11427	8688	10367	1963	1992	1689	375	358	340	323	343	327	1.03	1	0
Tb927.10.13260	hypothetical protein, conserved	1.38	6740	5090	6325	1237	1298	1150	4884	3688	4583	896	941	833	160	152	150	147	162	161	1.09	1	0
Tb927.10.13270	Periodic tryptophan protein 2 homolog, putative	1.99	4276	3370	4003	733	520	489	2149	1693	2012	368	261	246	71	70	66	60	45	48	0.71	1	0
Tb927.10.13280	GCN1 homologue, possibly involved in translation control	1	25326	19231	24631	4168	3587	3212	25326	19231	24631	4168	3587	3212	831	793	809	685	618	622	0.83	1	0
Tb927.10.13290	ethanolamine phosphotransferase (EPT)	1	3955	3385	4364	826	822	712	3955	3385	4364	826	822	712	130	140	143	136	142	138	1.01	1	0
Tb927.10.1330	hypothetical protein, conserved	1	1918	1649	1802	318	295	259	1918	1649	1802	318	295	259	63	68	59	52	51	50	0.91	1	0
Tb927.10.13300	Mitchondrial SSU ribosomal S8, putative	1	1158	910	1093	211	192	160	1158	910	1093	211	192	160	38	38	36	35	33	31	0.92	1	0
Tb927.10.13310	1RPB5 DNA-directed RNA polymerase II, putative ,(RPB5z)	1	1794	1345	1638	285	251	189	1794	1345	1638	285	251	189	59	55	54	47	43	37	0.84	1	0
Tb927.10.13320	DNA-directed RNA polymerases II subunit, putative (RPB5)	1	1025	930	1279	255	252	217	1025	930	1279	255	252	217	34	38	42	42	43	42	1.01	1	0
Tb927.10.13330	paraflagellar rod protein PFC20	1.25	6457	4841	5244	1091	974	938	5166	3873	4195	873	779	750	170	160	138	144	134	145	0.95	1	0
Tb927.10.13340	hypothetical protein, conserved	1	285	196	313	51	38	58	285	196	313	51	38	58	9	8	10	8	7	11	0.74	1	0
Tb927.10.13350	hypothetical protein, conserved	1	4023	3096	3771	732	727	612	4023	3096	3771	732	727	612	132	128	124	120	125	119	1.02	1	0
Tb927.10.13360	EF-Tu Mitochondrial elongation factor Tu	1	3852	3209	3760	767	663	580	3852	3209	3760	767	663	580	126	132	123	126	114	112	0.91	1	0
Tb927.10.13370	dynein light chain, putative,dynein Tctex1 family, putative	1	1286	1066	1267	276	282	215	1286	1066	1267	276	282	215	42	44	42	45	49	42	1.11	1	0
Tb927.10.13380	hypothetical protein, conserved	1	2036	1657	2357	394	417	337	2036	1657	2357	394	417	337	67	68	77	65	72	65	1.01	1	0
Tb927.10.13390	hypothetical protein, conserved	2.16	4879	3494	4534	723	729	667	2259	1618	2099	335	338	309	74	67	69	55	58	60	0.93	1	0
Tb927.10.1340	hypothetical protein, conserved	1	1858	1466	1604	336	280	271	1858	1466	1604	336	280	271	61	60	53	55	48	53	0.88	1	0
Tb927.10.13400	Phosphatidic acid phostphatase, putative	1.36	917	702	874	174	162	134	674	516	643	128	119	99	22	21	21	21	20	19	0.93	1	0
Tb927.10.13410	hypothetical protein	1	319	209	261	48	34	26	319	209	261	48	34	26	10	9	9	8	6	5	0.67	0	0
Tb927.10.13420	hypothetical protein	1	464	284	293	54	52	32	464	284	293	54	52	32	15	12	10	9	9	6	0.9	1	0
Tb927.10.13430	citrate synthase, putative	1	1328	998	1103	225	177	153	1328	998	1103	225	177	153	44	41	36	37	30	30	0.81	1	0
Tb927.10.13440	hypothetical protein, conserved	1	2049	1625	1979	336	306	329	2049	1625	1979	336	306	329	67	67	65	55	53	64	0.88	1	0
Tb927.10.13450	hypothetical protein, conserved	1	3345	2650	3347	613	562	521	3345	2650	3347	613	562	521	110	109	110	101	97	101	0.92	1	0
Tb927.10.13460	hypothetical protein	1	513	404	426	79	79	65	513	404	426	79	79	65	17	17	14	13	14	13	1	1	0
Tb927.10.13470	PA26 p53-induced protein (sestrin), putative	1	3284	2540	3296	617	612	533	3284	2540	3296	617	612	533	108	105	108	101	105	103	1	1	0
Tb927.10.13480	protein kinase, putative	1.1	2083	1764	2306	500	456	373	1894	1604	2096	455	415	339	62	66	69	75	71	66	0.98	1	0
Tb927.10.13490	serine/threonine kinase, putative	1.53	1363	1028	1308	295	290	222	891	672	855	193	190	145	29	28	28	32	33	28	1.08	1	0
Tb927.10.1350	hypothetical protein, conserved	1.52	3055	2629	3238	676	558	547	2010	1730	2130	445	367	360	66	71	70	73	63	70	0.88	1	0
Tb927.10.13500	60S ribosomal protein L10a	1.76	20733	17226	23613	4930	4230	3850	11780	9788	13416	2801	2403	2188	387	403	440	460	414	424	0.92	1	0
Tb927.10.13510	zinc metallopeptidase, putative	1	3508	2797	3271	580	603	504	3508	2797	3271	580	603	504	115	115	107	95	104	98	1.02	1	0
Tb927.10.13520	Zn-finger in Ran binding protein and others/FYVE zinc finger, putative	1	3811	2745	3186	626	591	567	3811	2745	3186	626	591	567	125	113	105	103	102	110	0.98	1	0
Tb927.10.13530	hypothetical protein	1	808	639	866	172	187	132	808	639	866	172	187	132	27	26	28	28	32	26	1.12	1	0
Tb927.10.13540	RBP12	1	1908	1502	1830	354	359	347	1908	1502	1830	354	359	347	63	62	60	58	62	67	1.04	1	0
Tb927.10.13550	hypothetical protein, conserved	1	5930	4720	5830	963	935	856	5930	4720	5830	963	935	856	195	195	191	158	161	166	0.92	1	0
Tb927.10.13560	Mevalonate-diphosphate decarboxylase	1.89	2845	2098	2647	486	553	470	1505	1110	1401	257	293	249	49	46	46	42	50	48	1.12	1	0
Tb927.10.13570	RBP27	3.02	3043	2342	3017	582	591	481	1008	775	999	193	196	159	33	32	33	32	34	31	1.03	1	0
Tb927.10.13580	major facilitator superfamily protein (MFS), putative	2.15	3353	2658	3485	634	736	584	1560	1236	1621	295	342	272	51	51	53	48	59	53	1.16	1	0
Tb927.10.13590	hypothetical protein, conserved	1.09	4662	3641	4810	866	810	738	4277	3340	4413	794	743	677	140	138	145	131	128	131	0.92	1	0
Tb927.10.1360	hypothetical protein, unlikely	1	445	332	495	83	88	69	445	332	495	83	88	69	15	14	16	14	15	13	0.97	1	0
Tb927.10.13600	hypothetical protein, possible component of cytochorome oxidase complex	1	515	403	435	82	76	56	515	403	435	82	76	56	17	17	14	13	13	11	0.93	1	0
Tb927.10.13610	hypothetical protein, conserved, 6 C2HC Zn fingers, Zn ribbon, matches other proteins with motif	1	4082	3231	3616	702	661	627	4082	3231	3616	702	661	627	134	133	119	115	114	122	0.97	1	0
Tb927.10.13620	NADH-ubiquinone oxidoreductase complex I subunit, NDUFA9 subunit, putative	1	2314	1642	1933	374	369	316	2314	1642	1933	374	369	316	76	68	63	61	64	61	1.02	1	0
Tb927.10.13630	ER glucosidase II	1	13663	10867	13864	2694	2925	2558	13663	10867	13864	2694	2925	2558	448	448	455	443	504	496	1.12	1	0
Tb927.10.13640	hypothetical protein, conserved	1.97	2600	2033	2545	487	471	457	1320	1032	1292	247	239	232	43	43	42	41	41	45	0.98	1	0
Tb927.10.13650	ARF-like 2-binding protein, putative	1	617	537	601	130	122	114	617	537	601	130	122	114	20	22	20	21	21	22	1	1	0
Tb927.10.13660	Domain of unknown function DUF21, putative	1	3354	2603	2958	594	564	502	3354	2603	2958	594	564	502	110	107	97	98	97	97	0.99	1	0
Tb927.10.13670	serine/threonine protein phosphatase 5, PP5, interacts with HSP83	1	6163	4676	5457	966	885	751	6163	4676	5457	966	885	751	202	193	179	159	152	146	0.9	1	0
Tb927.10.13680	lipase domain protein, putative,hypothetical protein	1.8	2526	1930	2812	481	572	604	1403	1072	1562	267	318	336	46	44	51	44	55	65	1.15	1	0
Tb927.10.13690	hypothetical protein, conserved	2.35	4864	3485	4528	721	728	665	2070	1483	1927	307	310	283	68	61	63	50	53	55	0.93	1	0
Tb927.10.1370	hypothetical protein, conserved	1	1037	890	1223	239	207	194	1037	890	1223	239	207	194	34	37	40	39	36	38	0.9	1	0
Tb927.10.13700	phosphatidic acid phosphatase alpha, putative	1.44	527	363	448	101	92	85	366	252	311	70	64	59	12	10	10	12	11	11	0.96	1	0
Tb927.10.13710	Activator of Hsp90 ATPase, N-terminal/Activator of Hsp90 ATPase homolog 1-like protein, putative	1	5891	4788	7142	1157	1118	1040	5891	4788	7142	1157	1118	1040	193	197	234	190	193	202	0.91	1	0
Tb927.10.13720	RBP29	1	6865	5732	6938	1415	1220	1091	6865	5732	6938	1415	1220	1091	225	236	228	233	210	211	0.91	1	0
Tb927.10.13730	60S ribosomal protein L7	1	2327	1766	2104	364	318	289	2327	1766	2104	364	318	289	76	73	69	60	55	56	0.85	1	0
Tb927.10.13740	calcium-dependent lipid binding protein, putative,synaptotagmin, putative (CaLB)	1.6	3140	2224	2377	475	402	336	1963	1390	1486	297	251	210	64	57	49	49	43	41	0.87	1	0
Tb927.10.13750	hypothetical protein, conserved	1.48	1688	1317	1513	270	281	196	1141	890	1022	182	190	132	37	37	34	30	33	26	1.02	1	0
Tb927.10.13760	hypothetical protein, conserved	1.99	1445	1221	1465	317	269	257	726	614	736	159	135	129	24	25	24	26	23	25	0.9	1	0
Tb927.10.13770	hypothetical protein, conserved	2	548	465	523	123	123	112	274	233	262	62	62	56	9	10	9	10	11	11	1.1	1	0
Tb927.10.13780	GSK3-short glycogen synthase kinase 3	2	6163	4935	5864	1042	1071	873	3082	2468	2932	521	536	437	101	102	96	86	92	85	1.01	1	0
Tb927.10.13790	hypothetical protein, conserved, no human or yeast homologue	1	12780	10436	11179	2464	2178	1947	12780	10436	11179	2464	2178	1947	420	430	367	405	375	377	0.97	1	0
Tb927.10.1380	NEK19 protein kinase	1.21	4510	3463	4622	832	851	717	3727	2862	3820	688	703	593	122	118	125	113	121	115	1.01	1	0
Tb927.10.13800	hypothetical protein, conserved, no yeast or human match	1.14	3955	3250	3871	868	783	701	3469	2851	3396	761	687	615	114	118	111	125	118	119	1	1	0
Tb927.10.13810	hypothetical protein, conserved	1	491	464	533	103	93	93	491	464	533	103	93	93	16	19	17	17	16	18	0.91	1	0
Tb927.10.13820	Mitchondrial SSU ribosomal protein	1	1292	1055	1259	212	210	217	1292	1055	1259	212	210	217	42	43	41	35	36	42	0.94	1	0
Tb927.10.13830	chaperone DNAj, putative, J23	1	1848	1344	1546	295	294	237	1848	1344	1546	295	294	237	61	55	51	48	51	46	1.02	1	0
Tb927.10.13840	Domain of unknown function (DUF4475), putative	1	1916	1456	1866	404	418	389	1916	1456	1866	404	418	389	63	60	61	66	72	75	1.13	1	0
Tb927.10.13850	ATP12 chaperone protein, putative	1	1840	1338	1668	340	305	251	1840	1338	1668	340	305	251	60	55	55	56	53	49	0.95	1	0
Tb927.10.13860	GPI-anchor transamidase subunit 8 (GPI8)	1	3875	2998	3044	589	595	559	3875	2998	3044	589	595	559	127	124	100	97	102	108	1.03	1	0
Tb927.10.13870	tubulin tyrosine ligase protein, putative	1	3312	2601	3119	500	525	443	3312	2601	3119	500	525	443	109	107	102	82	90	86	0.97	1	0
Tb927.10.13880	hypothetical protein, conserved	1	4253	3379	4396	752	726	674	4253	3379	4396	752	726	674	140	139	144	124	125	131	0.93	1	0
Tb927.10.13890	hypothetical protein, conserved	1	1547	1219	1448	276	237	214	1547	1219	1448	276	237	214	51	50	48	45	41	41	0.87	1	0
Tb927.10.1390	hypoxanthine-guanine phosphoribosyltransferase, putative	1	4693	3891	3482	576	572	471	4693	3891	3482	576	572	471	154	160	114	95	99	91	0.94	1	0
Tb927.10.13900	UDP-galactose transporter	1	1877	1521	1840	381	349	294	1877	1521	1840	381	349	294	62	63	60	63	60	57	0.97	1	0
Tb927.10.13910	hypothetical protein, conserved	1	831	615	669	149	126	112	831	615	669	149	126	112	27	25	22	24	22	22	0.94	1	0
Tb927.10.13920	hypothetical protein, conserved	1	975	808	1005	245	203	203	975	808	1005	245	203	203	32	33	33	40	35	39	0.95	1	0
Tb927.10.13930	phosphatidic acid phosphatase, putative	1.77	2132	2004	2503	439	452	384	1205	1132	1414	248	255	217	40	47	46	41	44	42	1	1	0
Tb927.10.13940	hypothetical protein, unlikely	1.13	678	506	595	111	89	92	600	448	527	98	79	81	20	18	17	16	14	16	0.82	1	0
Tb927.10.13950	tubulin-specific chaperone, putative	1	1735	1426	1698	300	300	281	1735	1426	1698	300	300	281	57	59	56	49	52	54	0.98	1	0
Tb927.10.13960	flagellar protein PF20	1	3678	2811	3201	609	547	501	3678	2811	3201	609	547	501	121	116	105	100	94	97	0.91	1	0
Tb927.10.13970	uracil-DNA glycosylase, putative	1	1533	1203	1357	258	232	213	1533	1203	1357	258	232	213	50	50	45	42	40	41	0.91	1	0
Tb927.10.13980	btb/poz domain containing protein, putative	1	1007	805	1019	162	169	156	1007	805	1019	162	169	156	33	33	33	27	29	30	0.95	1	0
Tb927.10.13990	hypothetical protein, conserved	1	1237	852	1183	236	211	193	1237	852	1183	236	211	193	41	35	39	39	36	37	0.91	1	0
Tb927.10.140	hypothetical protein	9.97	153	117	165	22	20	22	15	12	17	2	2	2	0	0	1	0	0	0	0	0	0
Tb927.10.1400	hypoxanthine-guanine phosphoribosyltransferase (HGPRT)	2.52	3341	2690	2874	538	516	458	1326	1067	1140	213	205	182	44	44	37	35	35	35	0.96	1	0
Tb927.10.14000	aconitase (ACO)	1	3479	2550	3170	613	558	452	3479	2550	3170	613	558	452	114	105	104	101	96	88	0.93	1	0
Tb927.10.14010	RP2 basal body protein, required for axoneme formation	1	5664	4547	5107	948	924	839	5664	4547	5107	948	924	839	186	187	168	156	159	163	0.98	1	0
Tb927.10.14020	hypothetical protein, conserved, in mitochondrion	1	1972	1637	2046	365	387	323	1972	1637	2046	365	387	323	65	67	67	60	67	63	1.05	1	0
Tb927.10.14030	hypothetical protein, conserved, in Golgi and ER	1	6569	5563	8252	1327	1699	1360	6569	5563	8252	1327	1699	1360	216	229	271	218	293	264	1.2	1	0
Tb927.10.14040	vacuolar ATP synthase subunit c, putative	1	3949	3139	3809	567	640	531	3949	3139	3809	567	640	531	130	129	125	93	110	103	1	1	0
[truncated: 8,874 more rows]

## Sheet: 2. DeSeq2 927 Unique set
GeneID	Annotation	Category	baseMean	log2FoldChange +tet/-tet	padj +tet/-tet	log2FoldChange +tet/rest	padj +tet/rest	log2FoldChange +tet/WT	padj 13_14 vs +tet/WT	log2FoldChange -tet/WT	Padj -tet/WT	1.3x down +tet/-tet	1.3x up +tet/-tet	1.3x down +tet/rest	1.3x up +tet/rest	1.3x up +tet/WT	1.3x down +tet/WT	1.3x up -tet/WT	1.3x down -tet/WT	Regulation
Tb927.1.4650	cyclin-like F-box protein (CFB2)	Ubiquitin.proteasome	5796.1	-1.0833	4.06e-41	-1.1099	1.97e-48	-1.1064	2.3e-44	-0.0231	0.953	1	0	1	0	0	1	0	0	1
Tb927.8.1945	Hypothetical at transcription start	ZUnknown	487	-0.75	4.44724e-09	-0.91	3.7e-14	-0.99	1.98e-17	-0.24	0.017	1	0	1	0	0	1	0	0	1
Tb927.11.2690	succinyl-coA:3-ketoacid-coenzyme A transferase, mitochondrial precursor, putative	Mito.citric.acid.cycle	1696.3	-0.5677	4.58e-08	-0.4591	0.0074	-1.0551	6.85e-31	-0.4874	5.89e-07	1	0	1	0	0	1	0	1	1
Tb927.10.3540	hypothetical protein, conserved	ZUnknown	707.3	-0.5	0.000111	-0.5927	9.01e-08	-0.6197	4.22e-08	-0.1196	NA	1	0	1	0	0	1	0	0	1
Tb927.5.3810	orotidine-5-phosphate decarboxylase/orotate phosphoribosyltransferase, OMPDCase-OPRTase	Nucleotides	2663.2	-0.4507	8.34e-07	-0.5119	4.46e-09	-0.5655	1.19e-11	-0.1148	0.521	1	0	1	0	0	1	0	0	1
Tb927.4.2310	asparaginyl-tRNA synthetase, putative	Translation.tRNA	4039.6	-0.4223	3.85e-07	-0.4309	9.09e-09	-0.4268	7.08e-08	-0.0045	0.998	1	0	1	0	0	1	0	0	1
Tb927.4.3400	hypothetical protein, conserved, ARM repeat	ZUnknown	1542	-0.4016	0.00075	-0.4485	1.42e-05	-0.4674	7.09e-06	-0.0658	0.846	1	0	1	0	0	1	0	0	1
Tb927.6.440	haptoglobin-hemoglobin receptor (HpHbR)	Vesicular.transport	1875	0.4046	0.000635	0.5028	1.49e-05	0.6376	7.13e-11	0.233	0.11	0	1	0	1	1	0	0	0	1
Tb927.4.810	ESAG5, putative	ESAG	1258.5	0.4051	0.000507	0.2713	0.0701	0.169	0.248	-0.2362	0.0824	0	1	0	0	0	0	0	0	0
Tb927.11.7550	hypothetical protein, conserved	ZUnknown	1186.9	0.4084	0.000395	0.4191	1.18e-05	0.4004	0.000121	-0.008	0.997	0	1	0	1	1	0	0	0	1
Tb927.11.13520	hypothetical protein, conserved	ZUnknown	4469.7	0.4111	3.57e-07	0.4492	2.57e-09	0.4818	1.18e-10	0.0707	0.76	0	1	0	1	1	0	0	0	1
Tb927.11.7410	MSP-A, putative	Membrane.protein	2510.3	0.4175	2.48e-06	0.4573	7.02e-09	0.483	2.72e-09	0.0656	0.809	0	1	0	1	1	0	0	0	1
Tb927.7.4690	hypothetical protein	ZUnknown	812.7	0.428	0.000664	0.4067	0.000207	0.3573	0.00285	-0.0708	NA	0	1	0	1	0	0	0	0	1
Tb927.10.11140	hypothetical protein, conserved, kineto-specific, signal peptide	ZUnknown	5019.3	0.4591	7.21e-09	0.5353	4.83e-09	0.6616	7.57e-20	0.2025	0.0536	0	1	0	1	1	0	0	0	1
Tb927.11.13130	membrane-bound acid phosphatase 1 precursor (MBAP1)	Phosphatase	3208.7	0.4623	7.27e-08	0.3635	0.000376	0.2892	0.00179	-0.1731	0.184	0	1	0	0	0	0	0	0	0
Tb927.7.6420	hypothetical protein, conserved	ZUnknown	971.1	0.4698	2.64e-05	0.3367	0.0117	0.2392	0.0622	-0.2307	0.101	0	1	0	0	0	0	0	0	0
Tb927.6.4250	hypothetical protein, conserved	ZUnknown	1070.6	0.4951	2.65e-06	0.544	1.69e-09	0.5517	1.19e-08	0.0566	0.881	0	1	0	1	1	0	0	0	1
Tb927.9.1440	Paraquat-inducible protein A, putative	ZUnknown	6912	0.4951	5.28e-12	0.578	2.57e-09	0.7586	3.32e-30	0.2635	0.00164	0	1	0	1	1	0	0	0	1
Tb927.2.1920	ESAG5, putative	ESAG	2112.3	0.5144	3.92e-08	0.5118	1.37e-09	0.4876	5.64e-08	-0.0268	0.948	0	1	0	1	1	0	0	0	1
Tb927.6.1010	cysteine peptidase precursor, Clan CA, family C1, Cathepsin L-like (CP)	Protease	48424.4	0.5147	3.59e-10	0.5725	5.07e-11	0.6557	3.39e-17	0.141	0.369	0	1	0	1	1	0	0	0	1
Tb927.11.8830	Enriched in surface-labeled proteome protein 2 (ESP2)	ZUnknown	1315.8	0.5149	1.6e-06	0.5931	1.69e-09	0.6533	1.71e-11	0.1384	0.516	0	1	0	1	1	0	0	0	1
Tb927.7.2160	hypothetical protein, conserved, no domains, no yeast or human match	ZUnknown	1436.2	0.536	8.89e-07	0.6316	6.42e-09	0.7621	6.47e-15	0.2261	0.151	0	1	0	1	1	0	0	0	1
Tb927.11.5290	mitochondrial carrier protein, MCP9	Mito.transport	654.1	0.5463	0.000111	0.4599	0.00715	0.8789	1.99e-13	0.3326	NA	0	1	0	1	1	0	0	0	1
Tb927.7.7510	hypothetical protein (cytoplasm, points, reticulated)	ZUnknown	18173.5	0.5803	1.62e-10	0.5026	2.26e-07	0.4424	2.33e-06	-0.1379	0.459	0	1	0	1	1	0	0	0	1
Tb927.4.1230	hypothetical protein (cytoplasm, nuclear lumen)	ZUnknown	3644.1	0.5988	4.29e-10	0.5559	3.84e-09	0.5072	1.17e-07	-0.0916	0.751	0	1	0	1	1	0	0	0	1
Tb927.3.2360	hypothetical protein, conserved (endocytic, cytoplasm)	ZUnknown	687.9	0.6094	7.06e-08	0.677	2.13e-12	0.6729	1.39e-10	0.0635	NA	0	1	0	1	1	0	0	0	1
Tb927.7.4770	cyclophilin-type peptidyl-prolyl cis-trans isomerase, glycoaomal or all over	Chaperone	4424.5	0.6146	4.81e-15	0.5894	3.32e-15	0.5571	5.25e-13	-0.0575	0.836	0	1	0	1	1	0	0	0	1
Tb927.11.1470	65 kDa invariant surface glycoprotein (ISG65)	Membrane.protein	1190.3	0.6331	7.89e-11	0.5284	2.24e-07	0.4485	5.46e-06	-0.1846	0.248	0	1	0	1	1	0	0	0	1
Tb927.6.560	cysteine peptidase C (cytoplasmic)	Protease	4415.1	0.6643	1.78e-13	0.7364	6.44e-15	0.8511	2.18e-23	0.1868	0.222	0	1	0	1	1	0	0	0	1
Tb927.5.630	acidic phosphatase (pellicular membrane, endocytic)	Phosphatase	5730.4	0.6763	8.54e-19	0.6456	3.03e-18	0.612	5.31e-16	-0.0642	0.809	0	1	0	1	1	0	0	0	1
Tb927.10.10000	hypothetical protein, (cytoplasm, nucleoplasm)	ZUnknown	1357.6	0.7017	3.39e-13	0.5862	9.84e-09	0.5012	2.79e-07	-0.2005	0.198	0	1	0	1	1	0	0	0	1
Tb927.10.2410	MSP-C, putative	Membrane.protein	2863.6	0.8802	3.74e-24	0.9495	5.59e-27	1.0474	6.57e-36	0.1672	0.313	0	1	0	1	1	0	0	0	1
Tb927.7.6490	hypothetical protein (cytoplasm)	ZUnknown	1349.7	1.0413	1.94e-27	0.7574	9.86e-08	1.4731	6.71e-58	0.4318	0.000106	0	1	0	1	1	0	1	0	1
Tb927.7.180	Trypanosomal VSG domain containing protein, putative	ZUnknown	5482.5	1.1239	8.01e-33	1.1817	2.36e-29	1.4188	7.22e-54	0.2949	0.0247	0	1	0	1	1	0	0	0	1
Tb927.7.6600	hypothetical protein, conserved	ZUnknown	1160.9	1.1323	1.94e-27	0.8225	3.91e-09	1.5388	3.14e-53	0.4065	0.00164	0	1	0	1	1	0	1	0	1
Tb927.7.6570	Enriched in surface-labeled proteome protein 17 (ESP17)	ZUnknown	676	1.3354	6.55e-40	1.4351	8.66e-43	1.6573	5.38e-66	0.3219	NA	0	1	0	1	1	0	0	0	1
Tb927.8.5120	cytochrome c	Mito.e.transport	565.9	-0.4972	NA	-0.6127	1.64e-06	-0.6449	4.29e-07	-0.1476	NA	0	0	1	0	0	1	0	0	1
Tb927.10.11270	RBP23	RNA.binding	421.8	-0.4465	NA	-0.5667	9.36e-06	-0.5993	2.13e-06	-0.1528	NA	0	0	1	0	0	1	0	0	1
Tb927.8.500	hypothetical protein	ZUnknown	65.8	-0.4283	NA	-0.0622	0.813	0.1614	0.478	0.5896	NA	0	0	0	0	0	0	0	0	1
Tb927.10.11990	RNA-binding protein NIP7	rRNA.tRNA.process	448.9	-0.4107	NA	-0.4543	0.000508	-0.4153	0.00302	-0.0046	NA	0	0	1	0	0	1	0	0	1
Tb927.8.490	hypothetical protein	ZUnknown	119.9	-0.3948	NA	-0.0116	0.967	0.4639	0.00325	0.8587	NA	0	0	0	0	1	0	0	0	1
Tb927.11.6740	PUF10	rRNA.tRNA.process	1650.5	-0.358	0.00107	-0.3628	0.000104	-0.3471	0.000492	0.0109	0.993	0	0	0	0	0	0	0	0	0
Tb927.5.2530	Kre33 homologue, required for biogenesis of ribsomal small subunit in yeast	rRNA.tRNA.process	2270.4	-0.353	0.000471	-0.4029	4.91e-06	-0.4385	3.54e-07	-0.0855	0.708	0	0	1	0	0	1	0	0	1
Tb927.9.15870	hypothetical protein	ZUnknown	1315.7	-0.3494	0.0138	-0.4926	0.000327	-0.7036	1.19e-11	-0.3542	0.00404	0	0	1	0	0	1	0	0	1
Tb927.10.13270	Periodic tryptophan protein 2 homolog, putative	ZUnknown	1498.3	-0.3493	0.00204	-0.385	3.8e-05	-0.3957	4.76e-05	-0.0464	0.899	0	0	1	0	0	1	0	0	1
Tb927.5.1150	ATP-dependent RNA helicase, Prp43, splicing & rRNA processing	RNA.processing	1536.8	-0.3459	0.0037	-0.3673	0.000217	-0.3645	0.000486	-0.0186	0.97	0	0	0	0	0	0	0	0	0
Tb927.8.1790	hypothetical protein, conserved	ZUnknown	498.9	-0.3452	NA	-0.3243	0.0421	-0.2603	0.125	0.0849	NA	0	0	0	0	0	0	0	0	0
Tb927.9.4500	HSP70, endoplasmatic reticulum, HSP70.a	Chaperone	7010.8	-0.3413	0.00738	-0.313	0.0111	-0.278	0.0233	0.0633	0.865	0	0	0	0	0	0	0	0	0
Tb927.10.15380	U3 snoRNA-associated protein UTP11, putative	rRNA.tRNA.process	827.3	-0.3388	0.0195	-0.3966	0.000548	-0.4119	0.000462	-0.0731	NA	0	0	1	0	0	1	0	0	1
Tb927.10.2370	LA	Nuclear.transport	2069.9	-0.3251	0.00434	-0.3545	0.000214	-0.3658	0.000191	-0.0407	0.913	0	0	0	0	0	0	0	0	0
Tb927.10.3610	hypothetical protein, conserved	ZUnknown	497.5	-0.3221	NA	-0.3582	0.00767	-0.3371	0.017	-0.0151	NA	0	0	0	0	0	0	0	0	0
Tb927.9.14410	CE1, cytosolic re-capping	RNA.processing	391.1	-0.3187	NA	-0.2591	0.161	-0.1717	0.394	0.1469	NA	0	0	0	0	0	0	0	0	0
Tb927.10.12430	Noc2p family, putative	ZUnknown	1733.4	-0.3176	0.00575	-0.3574	0.000182	-0.3771	9e-05	-0.0596	0.84	0	0	0	0	0	0	0	0	0
Tb927.10.14870	hypothetical protein, conserved	ZUnknown	1764.6	-0.3169	0.00552	-0.3558	0.000166	-0.375	8.86e-05	-0.0581	0.846	0	0	0	0	0	0	0	0	0
Tb927.11.5600	ATOM14 - POMP14	Mito.biogenesis	372.2	-0.3163	NA	-0.3549	0.0184	-0.322	0.0403	-0.0057	NA	0	0	0	0	0	0	0	0	0
Tb927.3.620	ATP-dependent DEAD/H RNA helicase, putative Dbp7, ribosome biogenesis?	rRNA.tRNA.process	1086.5	-0.3153	0.0227	-0.3823	0.000558	-0.4197	0.000116	-0.1044	0.693	0	0	1	0	0	1	0	0	1
Tb927.10.1630	RLI translation termination & ribosome recycling	Translation	1676.1	-0.315	0.0142	-0.3852	0.000379	-0.4409	1.26e-05	-0.1259	0.546	0	0	1	0	0	1	0	0	1
Tb927.3.3670	TRRM3	RNA.binding	997.3	-0.313	0.0234	-0.2914	0.0171	-0.2508	0.0533	0.0622	0.861	0	0	0	0	0	0	0	0	0
Tb927.10.1560	NOP91	Cell.cycle	2189.2	-0.3124	0.00377	-0.2893	0.00315	-0.2576	0.0118	0.0548	0.856	0	0	0	0	0	0	0	0	0
Tb927.11.4120	leucine-rich repeat protein (LRRP)	LRRP	689.8	-0.3114	0.0559	-0.1693	0.489	-0.0349	0.898	0.2765	NA	0	0	0	0	0	0	0	0	0
Tb927.11.14950	ZFP2	RNA.binding	2161.8	-0.3105	0.00387	-0.3149	0.000537	-0.3049	0.00156	0.0056	0.997	0	0	0	0	0	0	0	0	0
Tb927.6.3250	C2H2 type zinc-finger (2 copies), putative	ZUnknown	347.9	-0.3102	NA	-0.3039	0.0781	-0.2411	0.188	0.0691	NA	0	0	0	0	0	0	0	0	0
Tb927.1.4690	arginine N-methyltransferase (PRMT1)	Arg.methylation	1199.4	-0.3051	0.0227	-0.4101	0.00049	-0.513	2.06e-07	-0.2079	0.139	0	0	1	0	0	1	0	0	1
Tb927.4.3320	uracil phosphoribosyltransferase, putative	Nucleotides	1095	-0.3033	0.0295	-0.431	0.000734	-0.5791	6.15e-09	-0.2758	0.0233	0	0	1	0	0	1	0	0	1
Tb927.8.730	nucleolar RNA-binding protein, putative	rRNA.tRNA.process	2189.7	-0.298	0.0446	-0.1687	0.46	-0.0421	0.862	0.2559	0.0793	0	0	0	0	0	0	0	0	0
Tb927.11.14960	PUF7	rRNA.tRNA.process	1178.8	-0.2962	0.0358	-0.3683	0.00115	-0.4168	0.000105	-0.1206	0.603	0	0	0	0	0	1	0	0	1
Tb927.11.360	ATP-binding protein, putative	ZUnknown	952	-0.2958	0.0803	-0.3128	0.0226	-0.2983	0.0322	-0.0026	0.998	0	0	0	0	0	0	0	0	0
Tb927.5.3520	queuine tRNA-ribosyltransferase, putative	rRNA.tRNA.process	381.7	-0.2936	NA	-0.3558	0.0238	-0.3405	0.0322	-0.0469	NA	0	0	0	0	0	0	0	0	0
Tb927.9.12690	prenyl protein specific carboxyl methyltransferase	Prenylation	297.8	-0.2908	NA	-0.3098	0.103	-0.2541	0.19	0.0366	NA	0	0	0	0	0	0	0	0	0
Tb927.9.2120	hypothetical protein, conserved, E-7 to a helicobacter recombinase	ZUnknown	416.5	-0.2904	NA	-0.3807	0.00916	-0.4	0.00513	-0.1096	NA	0	0	1	0	0	1	0	0	1
Tb927.9.7250	hypothetical protein, conserved	ZUnknown	272.4	-0.2899	NA	-0.4013	0.0118	-0.417	0.00645	-0.127	NA	0	0	1	0	0	1	0	0	1
Tb927.2.3090	hypothetical protein, conserved	ZUnknown	443.2	-0.2894	NA	-0.4139	0.0108	-0.4735	0.00146	-0.1841	NA	0	0	1	0	0	1	0	0	1
Tb927.8.4290	Ribosome biogenesis protein Nop16, putative	ZUnknown	347.2	-0.2879	NA	-0.3792	0.0136	-0.3872	0.0102	-0.0993	NA	0	0	1	0	0	1	0	0	1
Tb927.5.3830	dihydroorotate dehydrogenase (fumarate), putative	Enzyme	1186	-0.2861	0.0662	-0.3647	0.00304	-0.4233	0.000193	-0.1372	0.543	0	0	0	0	0	1	0	0	1
Tb927.3.3750	paraflagellar rod protein PFC7	Cytoskeleton	1104.6	-0.2852	0.0583	-0.3798	0.00177	-0.4589	1.96e-05	-0.1737	0.337	0	0	1	0	0	1	0	0	1
Tb927.3.2470	PUF8	rRNA.tRNA.process	1579.5	-0.285	0.0662	-0.3864	0.00269	-0.4885	6.69e-06	-0.2036	0.234	0	0	1	0	0	1	0	0	1
Tb927.11.6720	cap guanine methyltransferase domain, capping-enzyme like	Translation	1542.2	-0.285	0.0515	-0.3707	0.00216	-0.447	2.86e-05	-0.162	0.386	0	0	0	0	0	1	0	0	1
Tb927.8.5490	Nucleolar protein,Nop52, putative	ZUnknown	1471.4	-0.2848	0.0229	-0.3077	0.00216	-0.3101	0.00304	-0.0253	0.949	0	0	0	0	0	0	0	0	0
Tb927.7.2590	prefoldin, putative	Chaperone	804.8	-0.283	0.103	-0.2896	0.0367	-0.2651	0.0643	0.0179	NA	0	0	0	0	0	0	0	0	0
Tb927.10.13180	Nrap protein, putative	rRNA tRNA processing	2912.8	-0.2825	0.00564	-0.2752	0.00188	-0.2591	0.0052	0.0234	0.948	0	0	0	0	0	0	0	0	0
Tb927.7.1110	asparagine synthetase a, putative	Amino.acids	2499.4	-0.2812	0.0195	-0.3837	0.000944	-0.5053	1.27e-08	-0.2241	0.0583	0	0	1	0	0	1	0	0	1
Tb927.9.7670	hypothetical protein, conserved, no clear matches	ZUnknown	894	-0.2789	0.0718	-0.3181	0.00733	-0.3249	0.00692	-0.046	NA	0	0	0	0	0	0	0	0	0
Tb927.10.9780	ATP-dependent DEAD/H RNA helicase, putative Mak5, ribosome biogenesis?	rRNA.tRNA.process	1686.5	-0.278	0.0243	-0.2592	0.0183	-0.2299	0.0445	0.0481	0.892	0	0	0	0	0	0	0	0	0
Tb927.11.12030	hypothetical protein, conserved	ZUnknown	352	-0.2763	NA	-0.3653	0.0189	-0.3748	0.0134	-0.0984	NA	0	0	0	0	0	0	0	0	0
Tb927.11.14190	Staphylococcal nuclease homologue/Tudor domain containing protein, putative	ZUnknown	5071	-0.2728	0.00284	-0.3295	0.000152	-0.3866	2.24e-07	-0.1138	0.421	0	0	0	0	0	1	0	0	1
Tb927.8.5090	RPA1 RNA polymerase I largest subunit (RPA190)	RNA.synthesis	7621.9	-0.2721	0.0027	-0.2266	0.0215	-0.1828	0.0537	0.0893	0.614	0	0	0	0	0	0	0	0	0
Tb927.8.1510	ATP-dependent DEAD/H RNA helicase, putative Dbp3, ribosome biogenesis? Cis-spliced	rRNA.tRNA.process	2589.3	-0.2705	0.0177	-0.2129	0.0869	-0.1547	0.214	0.1158	0.513	0	0	0	0	0	0	0	0	0
Tb927.10.2360	hypothetical protein, tryp specific	ZUnknown	213	-0.2685	NA	-0.4259	0.0149	-0.4694	0.00307	-0.2009	NA	0	0	1	0	0	1	0	0	1
Tb927.11.2840	magnesium-dependent phosphatase-1/HAD phosphatase, family IIIC, putative	ZUnknown	420.2	-0.2684	NA	-0.3444	0.0402	-0.3496	0.0302	-0.0813	NA	0	0	0	0	0	0	0	0	0
Tb927.9.7370	ESAG9, putative	ESAG	301.3	-0.2668	NA	-0.3083	0.0878	-0.2723	0.135	-0.0055	NA	0	0	0	0	0	0	0	0	0
Tb927.10.10600	ARP2/3 complex 16kDa subunit, putative	Cytoskeleton	385.3	-0.2657	NA	-0.2008	0.435	-0.1118	0.66	0.1539	NA	0	0	0	0	0	0	0	0	0
Tb927.11.9080	NOP136	Cell.cycle	2929.2	-0.2645	0.0174	-0.2952	0.00144	-0.3154	0.00057	-0.0509	0.865	0	0	0	0	0	0	0	0	0
Tb927.4.4190	C2 domain containing protein, putative	ZUnknown	392.8	-0.2612	NA	-0.1952	0.422	-0.1066	0.664	0.1545	NA	0	0	0	0	0	0	0	0	0
Tb927.11.10620	hypothetical protein, conserved	ZUnknown	358.1	-0.2597	NA	-0.2839	0.124	-0.2465	0.186	0.0133	NA	0	0	0	0	0	0	0	0	0
Tb927.1.1370	rRNA biogenesis protein, putative	rRNA.tRNA.process	1223.4	-0.2588	0.0803	-0.2252	0.0947	-0.1814	0.197	0.0773	0.802	0	0	0	0	0	0	0	0	0
Tb927.8.4450	RBP11	RNA.binding	1011.2	-0.2539	0.115	-0.3373	0.00524	-0.398	0.000272	-0.1441	0.453	0	0	0	0	0	1	0	0	1
Tb927.7.3430	Mitchondrial LSU ribosome-associated cyclophilin type peptidyl-prolyl cis-trans isomerase, putative (PPIase)	Mito.translation	326.5	-0.2537	NA	-0.3086	0.0661	-0.2957	0.0775	-0.0419	NA	0	0	0	0	0	0	0	0	0
Tb927.11.3730	leucyl-tRNA synthetase, putative (LeuRS)	Translation.tRNA	5495.1	-0.2537	0.0131	-0.2759	0.00154	-0.292	0.000658	-0.0383	0.901	0	0	0	0	0	0	0	0	0
Tb927.8.5790	hypothetical protein	ZUnknown	652.2	-0.2531	0.215	-0.328	0.0179	-0.3599	0.00639	-0.1068	NA	0	0	0	0	0	0	0	0	0
Tb927.9.12330	thioredoxin, putative	ZUnknown	477.9	-0.2508	NA	-0.2944	0.063	-0.2845	0.0741	-0.0337	NA	0	0	0	0	0	0	0	0	0
Tb927.1.1700	AATF protein, putative	ZUnknown	837.6	-0.25	0.168	-0.1975	0.26	-0.1348	0.457	0.1152	NA	0	0	0	0	0	0	0	0	0
Tb927.3.5560	hypothetical protein, conserved	ZUnknown	202.5	-0.2489	NA	-0.0891	0.822	0.0798	0.786	0.3287	NA	0	0	0	0	0	0	0	0	0
Tb927.10.14680	ribosome biogenesis protein, putative	rRNA.tRNA.process	635.6	-0.2484	NA	-0.3254	0.0171	-0.36	0.00534	-0.1116	NA	0	0	0	0	0	0	0	0	0
Tb927.4.3840	nucleolar protein, putative	rRNA.tRNA.process	1139.7	-0.2476	0.151	-0.3141	0.0131	-0.3571	0.00242	-0.1095	0.688	0	0	0	0	0	0	0	0	0
Tb927.7.1780	Adenine phosphoribosyltransferase, putative	Nucleotides	1415.5	-0.2476	0.146	-0.3087	0.0159	-0.351	0.00285	-0.1034	0.717	0	0	0	0	0	0	0	0	0
Tb927.9.2890	hypothetical protein	ZUnknown	410.2	-0.2474	NA	-0.2827	0.0947	-0.2629	0.122	-0.0155	NA	0	0	0	0	0	0	0	0	0
Tb927.2.4550	SPB1 rRNA methyltransferase	rRNA.tRNA.process	2383.6	-0.2474	0.047	-0.2435	0.0222	-0.23	0.0337	0.0174	0.97	0	0	0	0	0	0	0	0	0
Tb927.5.2520	TPR repeat, putative	ZUnknown	1215.5	-0.2457	0.124	-0.3189	0.00758	-0.3724	0.000624	-0.1268	0.549	0	0	0	0	0	0	0	0	0
Tb927.6.4220	MAPK5 protein kinase	Protein.kinase	641.2	-0.2449	NA	-0.2138	0.231	-0.1633	0.372	0.0816	NA	0	0	0	0	0	0	0	0	0
Tb927.10.9570	paraflagellar rod protein PFC14	Cytoskeleton	7652.4	-0.2448	0.0342	-0.3125	0.00305	-0.3858	9.24e-06	-0.141	0.373	0	0	0	0	0	1	0	0	1
Tb927.11.12130	hypothetical protein	ZUnknown	130.3	-0.2447	NA	-0.2873	0.206	-0.2161	0.314	0.0286	NA	0	0	0	0	0	0	0	0	0
Tb927.5.3800	glutamine hydrolysing (not ammonia-dependent) carbomoyl phosphate synthase, putative	Amino.acids	8781	-0.2445	0.0195	-0.3521	0.00229	-0.4946	1.1e-10	-0.2501	0.00841	0	0	0	0	0	1	0	0	1
Tb927.11.13760	hypothetical protein, conserved	ZUnknown	390.6	-0.2439	NA	-0.2963	0.0659	-0.2902	0.0704	-0.0462	NA	0	0	0	0	0	0	0	0	0
Tb927.5.1740	hypothetical protein	ZUnknown	518.5	-0.2438	NA	-0.3401	0.0315	-0.383	0.00834	-0.1393	NA	0	0	0	0	0	1	0	0	1
Tb927.10.5600	hypothetical protein, conserved	ZUnknown	630.8	-0.2437	NA	-0.269	0.07	-0.2576	0.0873	-0.0138	NA	0	0	0	0	0	0	0	0	0
Tb927.5.1560	ATP-dependent DEAD/H RNA helicase, putative, no clear yeast homologue	RNA.helicase	1361.1	-0.2437	0.112	-0.2564	0.0312	-0.251	0.0375	-0.0073	0.997	0	0	0	0	0	0	0	0	0
Tb927.11.10480	PQQ-like domain/WD domain, G-beta repeat/Utp21 specific WD40 associated putative domain containing protein, putative	ZUnknown	2047.9	-0.2428	0.0493	-0.2603	0.00833	-0.2644	0.00834	-0.0216	0.957	0	0	0	0	0	0	0	0	0
Tb927.1.4540	cyclin-like F-box protein (CFB1A)	Ubiquitin.proteasome	7604.5	-0.2425	0.0627	-0.1591	0.376	-0.0774	0.65	0.1651	0.294	0	0	0	0	0	0	0	0	0
Tb927.11.14840	CPC2, chromosomal passenger complex	Chromatin	1672.7	-0.2424	0.0924	-0.2506	0.0295	-0.2443	0.0363	-0.0019	0.998	0	0	0	0	0	0	0	0	0
Tb927.3.2750	hypothetical protein, conserved	ZUnknown	1421.8	-0.2409	0.113	-0.2316	0.063	-0.2093	0.103	0.0317	0.938	0	0	0	0	0	0	0	0	0
Tb927.8.4190	hypothetical protein, conserved, no yeast or human match	ZUnknown	934.5	-0.2407	0.16	-0.3132	0.0108	-0.3583	0.00171	-0.1176	0.614	0	0	0	0	0	0	0	0	0
Tb927.3.1650	hypothetical protein	ZUnknown	222.1	-0.2403	NA	-0.4094	0.0222	-0.4852	0.00195	-0.2449	NA	0	0	1	0	0	1	0	0	1
Tb927.8.6320	hypothetical protein, conserved	ZUnknown	526.7	-0.2403	NA	-0.3302	0.0266	-0.3725	0.00656	-0.1322	NA	0	0	0	0	0	0	0	0	0
Tb927.3.3600	hypothetical protein	ZUnknown	160.5	-0.2388	NA	-0.3255	0.103	-0.2959	0.119	-0.0571	NA	0	0	0	0	0	0	0	0	0
Tb927.9.7960	hypothetical protein	ZUnknown	185.3	-0.2377	NA	-0.0862	0.832	0.0821	0.783	0.3198	NA	0	0	0	0	0	0	0	0	0
Tb927.11.2940	hypothetical protein, conserved	ZUnknown	528.2	-0.2372	NA	-0.2427	0.152	-0.2141	0.213	0.0231	NA	0	0	0	0	0	0	0	0	0
Tb927.3.1410	cytochrome oxidase subunit VII (COXVII)	Mito.e.transport	327.8	-0.2371	NA	-0.2114	0.337	-0.1503	0.497	0.0868	NA	0	0	0	0	0	0	0	0	0
Tb927.9.12110	6-phosphogluconate dehydrogenase, decarboxylating (gnD)	PPP	2790	-0.2366	0.0688	-0.2717	0.00952	-0.2966	0.00303	-0.06	0.836	0	0	0	0	0	0	0	0	0
Tb927.11.15460	ATP-dependent DEAD/H RNA helicase, putative, no clear yeast homologue	RNA.helicase	1249.3	-0.2366	0.125	-0.2502	0.0329	-0.245	0.0409	-0.0083	0.997	0	0	0	0	0	0	0	0	0
Tb927.8.4810	prohibitin 1 (PHB1)	Cell.cycle	795	-0.2365	0.222	-0.2009	0.227	-0.152	0.378	0.0845	NA	0	0	0	0	0	0	0	0	0
Tb927.4.2630	ATP-dependent DEAD/H RNA helicase, putative Dbp10, ribosome biogenesis?	rRNA.tRNA.process	1395.3	-0.2364	0.146	-0.1916	0.222	-0.142	0.366	0.0944	0.73	0	0	0	0	0	0	0	0	0
Tb927.10.10010	60S acidic ribosomal subunit	Ribosome	728	-0.2358	0.253	-0.2692	0.0546	-0.2703	0.0537	-0.0345	NA	0	0	0	0	0	0	0	0	0
Tb927.9.14160	Complex III cytochrome b/c complex, rieske iron-sulfur protein ISP	Mito.e.transport	729.3	-0.2339	0.25	-0.2601	0.0621	-0.2558	0.0694	-0.0219	NA	0	0	0	0	0	0	0	0	0
Tb927.7.2170	hypothetical protein, conserved, telomere repeat dimerization domain	ZUnknown	5005.1	-0.2325	0.0234	-0.2113	0.0291	-0.1874	0.0537	0.0451	0.876	0	0	0	0	0	0	0	0	0
Tb927.7.3470	p22 protein precursor, putative	Mito.pathway	401.6	-0.2315	NA	-0.3324	0.0416	-0.3708	0.0133	-0.1393	NA	0	0	0	0	0	0	0	0	0
Tb927.11.11590	eIF3E	Translation	2441	-0.2313	0.0662	-0.2591	0.00931	-0.2754	0.00489	-0.044	0.899	0	0	0	0	0	0	0	0	0
Tb927.6.2650	Homologue of yeast SGD1, small ribosomal subunit biogenesis. MA3 domain	rRNA.tRNA.process	1063.7	-0.2312	0.177	-0.2547	0.0416	-0.2551	0.0432	-0.0239	0.961	0	0	0	0	0	0	0	0	0
Tb927.8.5990	NLE (NUC135) domain/WD domain, G-beta repeat, putative	ZUnknown	1017.4	-0.2311	0.193	-0.2197	0.12	-0.1922	0.186	0.0389	0.925	0	0	0	0	0	0	0	0	0
Tb927.3.1350	hypothetical protein, conserved	ZUnknown	1718.5	-0.231	0.09	-0.219	0.0535	-0.1974	0.0947	0.0336	0.925	0	0	0	0	0	0	0	0	0
Tb927.11.2510	NUC173 domain containing protein, putative	ZUnknown	2788.1	-0.2309	0.0664	-0.2002	0.0959	-0.1664	0.167	0.0646	0.813	0	0	0	0	0	0	0	0	0
Tb927.10.2580	Nucleolar protein 12 (25kDa), putative	ZUnknown	708.6	-0.2308	0.273	-0.2209	0.161	-0.1888	0.247	0.042	NA	0	0	0	0	0	0	0	0	0
Tb927.11.3030	phosphoribosylpyrophosphate synthetase, putative (PRS)	PPP	1845.1	-0.2305	0.185	-0.2353	0.0895	-0.2262	0.0951	0.0043	0.998	0	0	0	0	0	0	0	0	0
Tb927.7.2760	Mitchondrial LSU ribosomal protein	Mito.translation	386.8	-0.2304	NA	-0.2434	0.187	-0.2122	0.25	0.0182	NA	0	0	0	0	0	0	0	0	0
Tb927.5.2660	CAP99 Clathrin-associated protein	Vesicular.transport	1979.5	-0.2301	0.0808	-0.223	0.0419	-0.2063	0.0684	0.0238	0.949	0	0	0	0	0	0	0	0	0
Tb927.7.700	hypothetical protein, conserved	ZUnknown	1083	-0.2296	0.193	-0.2592	0.0415	-0.2649	0.0361	-0.0353	0.934	0	0	0	0	0	0	0	0	0
Tb927.11.4190	hypothetical protein, conserved, Peptidase M24-like	Protease	1017.1	-0.2294	0.183	-0.2689	0.0286	-0.283	0.0188	-0.0536	0.886	0	0	0	0	0	0	0	0	0
Tb927.10.10670	kinetoplastid-specific dual specificity phosphatase, putative	Phosphatase	239.7	-0.2292	NA	-0.2637	0.206	-0.2308	0.25	-0.0016	NA	0	0	0	0	0	0	0	0	0
Tb927.6.2780	U3 small nuclear ribonucleoprotein (snRNP), putative	rRNA.tRNA.process	393.1	-0.2286	NA	-0.3063	0.058	-0.3252	0.0337	-0.0966	NA	0	0	0	0	0	0	0	0	0
Tb927.4.500	FHA domain containing protein, putative	ZUnknown	496.3	-0.2285	NA	-0.3419	0.0291	-0.4116	0.00268	-0.183	NA	0	0	0	0	0	1	0	0	1
Tb927.2.1810	transcription silencer (ISWI)	Chromatin	3989.3	-0.2285	0.0431	-0.2064	0.0482	-0.1808	0.0871	0.0477	0.873	0	0	0	0	0	0	0	0	0
Tb927.4.1830	Urm1 (Ubiquitin related modifier), putative	ZUnknown	281.7	-0.2281	NA	-0.1576	0.575	-0.066	0.824	0.1622	NA	0	0	0	0	0	0	0	0	0
Tb927.11.900	isocitrate dehydrogenase, putative (IDH)	Mito.citric.acid.cycle	1579.1	-0.227	0.173	-0.2851	0.0208	-0.3275	0.00346	-0.1004	0.701	0	0	0	0	0	0	0	0	0
Tb927.2.3780	IF2 translation initiation factor IF-2, putative	Translation	3741.8	-0.2265	0.0387	-0.247	0.00634	-0.2596	0.00349	-0.0331	0.922	0	0	0	0	0	0	0	0	0
Tb927.3.5400	RIO1 protein kinase	Protein.kinase	698.6	-0.2256	0.345	-0.2495	0.105	-0.2416	0.116	-0.0161	NA	0	0	0	0	0	0	0	0	0
Tb927.11.2930	Possible mitochondrial membrane protein	Mito.membrane	147.3	-0.2253	NA	-0.3028	0.151	-0.271	0.168	-0.0457	NA	0	0	0	0	0	0	0	0	0
Tb927.10.13010	protein kinase A catalytic subunit 3(PKAC3)	Protein.kinase	842.4	-0.2243	0.278	-0.2507	0.072	-0.2493	0.074	-0.025	NA	0	0	0	0	0	0	0	0	0
Tb927.6.2700	small nuclear ribonucleoprotein Sm-E	RNA.processing	467.3	-0.2242	NA	-0.2251	0.245	-0.1919	0.316	0.0323	NA	0	0	0	0	0	0	0	0	0
Tb927.6.2530	hypothetical protein	ZUnknown	229.8	-0.2241	NA	-0.3433	0.0683	-0.3634	0.0337	-0.1393	NA	0	0	0	0	0	0	0	0	0
Tb927.8.5820	Las1-like, putative	ZUnknown	519.9	-0.2238	NA	-0.2869	0.0614	-0.3035	0.0394	-0.0797	NA	0	0	0	0	0	0	0	0	0
Tb927.11.14700	hypothetical protein, conserved	Mito.pathway	577.8	-0.2232	NA	-0.311	0.0329	-0.3572	0.00701	-0.134	NA	0	0	0	0	0	0	0	0	0
Tb927.6.3980	hypothetical protein, conserved	ZUnknown	388.5	-0.2232	NA	-0.2194	0.278	-0.1783	0.374	0.0449	NA	0	0	0	0	0	0	0	0	0
Tb927.4.2740	EF hand protein, conserved, RNAi inc diff?	Translation	2682.5	-0.2225	0.119	-0.312	0.00948	-0.4086	1.12e-05	-0.1861	0.179	0	0	0	0	0	1	0	0	1
Tb927.9.8200	PES1	rRNA.tRNA.process	1936.6	-0.2219	0.111	-0.284	0.00874	-0.3345	0.000487	-0.1126	0.549	0	0	0	0	0	0	0	0	0
Tb927.10.11380	hypothetical protein, conserved	ZUnknown	651.6	-0.2196	0.367	-0.1913	0.315	-0.1458	0.433	0.0738	NA	0	0	0	0	0	0	0	0	0
Tb927.10.14750	fibrillarin, putative	rRNA.tRNA.process	1752.7	-0.2192	0.124	-0.1948	0.118	-0.1641	0.197	0.055	0.861	0	0	0	0	0	0	0	0	0
Tb927.10.13310	1RPB5 DNA-directed RNA polymerase II, putative ,(RPB5z)	RNA.synthesis	617.5	-0.2191	NA	-0.2725	0.0719	-0.2868	0.0489	-0.0677	NA	0	0	0	0	0	0	0	0	0
Tb927.10.15170	Homologue of yeast MBF1 - Transcriptional coactivator that bridges the DNA-binding region of Gcn4p and TATA-binding protein Spt15p; suppressor of frameshift mutations. Pedominantly in yeast cytosol. multiprotein binding factor and helix-turn-helix domain. (in UPF1-TAP)	RNA.synthesis	1628.9	-0.2183	0.146	-0.232	0.0415	-0.2316	0.0423	-0.0133	0.985	0	0	0	0	0	0	0	0	0
Tb927.3.1740	hypothetical protein, conserved	ZUnknown	1212.4	-0.2183	0.313	-0.2232	0.149	-0.2108	0.161	0.0075	0.997	0	0	0	0	0	0	0	0	0
Tb927.4.1900	Methyltransferase domain/Methyltransferase involved in Williams-Beuren syndrome, putative	ZUnknown	754.6	-0.2175	0.378	-0.2259	0.167	-0.2094	0.195	0.0081	NA	0	0	0	0	0	0	0	0	0
Tb927.8.630	lipoate-protein ligase, lipoyltransferase, lipoate biosynthesis protein, putative	Mito.pathway	382.4	-0.2174	NA	-0.2402	0.218	-0.2181	0.247	-0.0008	NA	0	0	0	0	0	0	0	0	0
Tb927.10.5020	eIF4E5	Translation	462	-0.2174	NA	-0.1757	0.454	-0.1139	0.618	0.1035	NA	0	0	0	0	0	0	0	0	0
Tb927.2.2970	mitochondrial carrier protein, MCP13	Mito.transport	588.5	-0.2161	NA	-0.2828	0.063	-0.3068	0.033	-0.0907	NA	0	0	0	0	0	0	0	0	0
Tb927.7.4570	inosine-guanine nucleoside hydrolase (IG-NH)	Nucleotides	2283.3	-0.2161	0.128	-0.1576	0.326	-0.0984	0.526	0.1177	0.525	0	0	0	0	0	0	0	0	0
Tb927.10.7500	fibrillarin (NOP1)	rRNA.tRNA.process	1567.6	-0.2153	0.164	-0.2343	0.042	-0.2382	0.0387	-0.0229	0.959	0	0	0	0	0	0	0	0	0
Tb927.11.16420	Methyltransferase TYW3, putative	ZUnknown	384.5	-0.215	NA	-0.2555	0.192	-0.2409	0.195	-0.0258	NA	0	0	0	0	0	0	0	0	0
Tb927.11.8340	hypothetical protein	ZUnknown	149.3	-0.2148	NA	-0.3724	0.0464	-0.409	0.0134	-0.1942	NA	0	0	0	0	0	1	0	0	1
Tb927.6.3510	tRNA modification enzyme, putative	rRNA.tRNA.process	861.5	-0.2148	0.332	-0.282	0.0383	-0.3195	0.0109	-0.1047	NA	0	0	0	0	0	0	0	0	0
Tb927.10.8920	TbGRP ras-like small GTPase	Signalling	964.8	-0.2147	0.267	-0.185	0.242	-0.1449	0.37	0.0698	0.834	0	0	0	0	0	0	0	0	0
Tb927.11.2300	ERF1 eukaryotic peptide chain release factor subunit 1, putative	Translation	1779.1	-0.2145	0.143	-0.275	0.0126	-0.3227	0.000998	-0.1082	0.589	0	0	0	0	0	0	0	0	0
Tb927.11.1220	hypothetical protein, conserved	ZUnknown	1056.5	-0.2134	0.265	-0.2858	0.0254	-0.3357	0.00313	-0.1223	0.584	0	0	0	0	0	0	0	0	0
Tb927.6.3270	hypothetical protein, conserved	ZUnknown	230.9	-0.2131	NA	-0.2416	0.273	-0.2048	0.329	0.0083	NA	0	0	0	0	0	0	0	0	0
Tb927.8.4890	endoplasmic reticulum oxidoreductin, Ero1, oxidises PDI	Vesicular.transport	2354.1	-0.2128	0.183	-0.3536	0.0133	-0.5422	3.76e-09	-0.3295	0.00164	0	0	0	0	0	1	0	0	1
Tb927.7.650	NOP105	Cell.cycle	1880.8	-0.2124	0.154	-0.1765	0.21	-0.1364	0.329	0.076	0.775	0	0	0	0	0	0	0	0	0
Tb927.6.590	hypothetical protein, conserved	Mito.pathway	461.9	-0.2121	NA	-0.2675	0.111	-0.2771	0.0819	-0.065	NA	0	0	0	0	0	0	0	0	0
Tb927.7.330	Thioesterase-like superfamily, putative	ZUnknown	289	-0.2121	NA	-0.1809	0.478	-0.1158	0.639	0.0963	NA	0	0	0	0	0	0	0	0	0
Tb927.10.12330	ZC3H34	RNA.binding	986.3	-0.2118	0.353	-0.1769	0.341	-0.131	0.477	0.0807	0.813	0	0	0	0	0	0	0	0	0
Tb927.11.15770	hypothetical protein, conserved	ZUnknown	412.2	-0.2116	NA	-0.1911	0.384	-0.1438	0.505	0.0678	NA	0	0	0	0	0	0	0	0	0
Tb927.11.4960	transcription elongation factor s-II, putative (TFIIS1)	RNA.synthesis	511.5	-0.2114	NA	-0.3052	0.0468	-0.3531	0.0109	-0.1417	NA	0	0	0	0	0	0	0	0	0
Tb927.11.3120	nucleolar GTP-binding protein 1 (NOG1)	rRNA.tRNA.process	2570.9	-0.2113	0.124	-0.2231	0.0385	-0.2251	0.0341	-0.0138	0.981	0	0	0	0	0	0	0	0	0
Tb927.11.2410	Flabarin, flagellar membrane protein in Leishmania & tryps	Membrane.protein	216.5	-0.2099	NA	-0.2654	0.218	-0.2455	0.216	-0.0356	NA	0	0	0	0	0	0	0	0	0
Tb927.7.7350	hypothetical protein	ZUnknown	202.3	-0.2098	NA	-0.2251	0.35	-0.1795	0.425	0.0303	NA	0	0	0	0	0	0	0	0	0
Tb927.3.4390	dihydrolipoamide dehydrogenase, putative (GCVL-1)	Enzyme	616.5	-0.2097	NA	-0.1838	0.34	-0.1402	0.462	0.0695	NA	0	0	0	0	0	0	0	0	0
Tb927.1.2310	hypothetical protein	ZUnknown	545.5	-0.2096	NA	-0.3472	0.0525	-0.4569	0.00195	-0.2474	NA	0	0	0	0	0	1	0	0	1
Tb927.10.830	adenylate kinase, putative (ADKB)	Nucleotides	915.9	-0.2089	0.402	-0.302	0.0402	-0.3732	0.00295	-0.1643	0.438	0	0	0	0	0	0	0	0	0
Tb927.5.2570	EIF3B translation initiation factor	Translation	3306.1	-0.2089	0.146	-0.2122	0.0697	-0.2085	0.0656	0.0004	0.999	0	0	0	0	0	0	0	0	0
Tb927.7.2290	hypothetical protein, conserved	Cytoskeleton	701.5	-0.2087	0.415	-0.2446	0.11	-0.2503	0.0907	-0.0416	NA	0	0	0	0	0	0	0	0	0
Tb927.3.3950	hypothetical protein, conserved	ZUnknown	953.2	-0.208	0.33	-0.2181	0.124	-0.2087	0.141	-0.0007	0.998	0	0	0	0	0	0	0	0	0
Tb927.5.1360	nucleoside 2-deoxyribosyltransferase (NDRT)	Nucleotides	863.6	-0.2078	0.459	-0.3828	0.0222	-0.6177	8.83e-08	-0.4099	NA	0	0	1	0	0	1	0	0	1
Tb927.10.15810	Fcf1 pre-rRNA processing, putative	rRNA.tRNA.process	385.8	-0.2077	NA	-0.308	0.0795	-0.3457	0.0295	-0.138	NA	0	0	0	0	0	0	0	0	0
Tb927.3.5130	exonuclease, putative	ZUnknown	554.9	-0.2072	NA	-0.2752	0.0832	-0.2991	0.0442	-0.0919	NA	0	0	0	0	0	0	0	0	0
Tb927.6.2840	RIO2 protein kinase	rRNA.tRNA.process	880.1	-0.207	0.36	-0.2733	0.0445	-0.3123	0.0122	-0.1053	NA	0	0	0	0	0	0	0	0	0
Tb927.7.5480	dihydrofolate reductase-thymidylate synthase (DHFR-TS)	Folate	999.8	-0.207	0.353	-0.1683	0.368	-0.1215	0.507	0.0855	0.789	0	0	0	0	0	0	0	0	0
Tb927.11.6020	hypothetical protein, conserved	ZUnknown	311.4	-0.2069	NA	-0.2394	0.231	-0.2177	0.258	-0.0108	NA	0	0	0	0	0	0	0	0	0
Tb927.2.4720	dolichyl-P-Man:GDP-Man7GlcNAc2-PP-dolichyl alpha-1,6-mannosyltransferase, putative	Glycans	980.6	-0.2067	0.351	-0.1659	0.376	-0.1177	0.521	0.089	0.773	0	0	0	0	0	0	0	0	0
Tb927.5.3740	RING-H2 zinc finger, putative	ZUnknown	178.2	-0.2064	NA	-0.2054	0.438	-0.1466	0.551	0.0599	NA	0	0	0	0	0	0	0	0	0
Tb927.11.7310	RNA binding protein, putative, RBD	RNA.binding	421.1	-0.2064	NA	-0.1683	0.476	-0.1096	0.632	0.0967	NA	0	0	0	0	0	0	0	0	0
Tb927.10.14330	Utp14 protein, putative	ZUnknown	2886.8	-0.2059	0.128	-0.2058	0.0606	-0.198	0.0699	0.0078	0.997	0	0	0	0	0	0	0	0	0
Tb927.9.3810	hypothetical protein	ZUnknown	57.1	-0.2057	NA	-0.2572	0.269	-0.1717	0.423	0.034	NA	0	0	0	0	0	0	0	0	0
Tb927.6.2500	RF-1 domain containing protein, putative	ZUnknown	233.9	-0.2052	NA	-0.256	0.227	-0.2319	0.249	-0.0267	NA	0	0	0	0	0	0	0	0	0
Tb927.11.1900	Tric complex beta subunit (TCP-1-beta)	Chaperone	4649.8	-0.205	0.0991	-0.2729	0.0107	-0.3435	5.2e-05	-0.1385	0.341	0	0	0	0	0	0	0	0	0
Tb927.10.2710	ferredoxin, putative	Mito.pathway	168.3	-0.2048	NA	-0.2862	0.177	-0.2686	0.168	-0.0638	NA	0	0	0	0	0	0	0	0	0
Tb927.1.2200	ZC3H4	RNA.binding	236.5	-0.2041	NA	-0.3568	0.0605	-0.4232	0.00923	-0.2191	NA	0	0	0	0	0	1	0	0	1
Tb927.8.2560	spliceosomal U5 snRNP-specific U5-15K protein, putative	RNA.processing	339.4	-0.2039	NA	-0.2069	0.341	-0.1708	0.412	0.033	NA	0	0	0	0	0	0	0	0	0
Tb927.6.2920	hypothetical protein, conserved	ZUnknown	714.3	-0.2033	0.45	-0.2421	0.12	-0.2504	0.0929	-0.0471	NA	0	0	0	0	0	0	0	0	0
Tb927.10.8960	hypothetical protein, conserved	ZUnknown	323.1	-0.2032	NA	-0.2811	0.132	-0.2899	0.0962	-0.0867	NA	0	0	0	0	0	0	0	0	0
Tb927.8.1410	pre-rrna-processing protein Tsr1 homolog	rRNA.tRNA.process	1569.6	-0.2032	0.443	-0.2738	0.0794	-0.3305	0.0127	-0.1273	0.654	0	0	0	0	0	0	0	0	0
Tb927.11.9610	eIF3I	Translation	1765	-0.2026	0.227	-0.2743	0.023	-0.3363	0.000998	-0.1337	0.456	0	0	0	0	0	0	0	0	0
Tb927.10.13280	GCN1 homologue, possibly involved in translation control	Translation	9140.3	-0.2025	0.0703	-0.2149	0.0239	-0.2237	0.0133	-0.0212	0.951	0	0	0	0	0	0	0	0	0
Tb927.4.1890	hypothetical protein, conserved	ZUnknown	581.5	-0.2022	NA	-0.1762	0.384	-0.1328	0.505	0.0694	NA	0	0	0	0	0	0	0	0	0
Tb927.3.2970	hypothetical protein, conserved	ZUnknown	191.4	-0.202	NA	-0.2693	0.212	-0.252	0.204	-0.05	NA	0	0	0	0	0	0	0	0	0
Tb927.11.18680	dynein light chain LC8, putative (DYNLL1)	RNA.synthesis	2172.7	-0.2014	0.283	-0.2085	0.131	-0.2056	0.119	-0.0042	0.998	0	0	0	0	0	0	0	0	0
Tb927.10.13410	hypothetical protein	ZUnknown	97	-0.2013	NA	-0.301	0.167	-0.2689	0.169	-0.0676	NA	0	0	0	0	0	0	0	0	0
Tb927.3.5580	tryptophanyl-tRNA synthetase, putative	Translation.tRNA	1195.1	-0.2009	0.397	-0.2408	0.0978	-0.2598	0.0552	-0.0589	0.885	0	0	0	0	0	0	0	0	0
Tb927.9.5320	nucleolar RNA binding protein, putative (28G16.220)	rRNA.tRNA.process	2195.1	-0.2009	0.151	-0.1854	0.113	-0.1638	0.168	0.0371	0.914	0	0	0	0	0	0	0	0	0
Tb927.6.1870	eIF4E4	Translation	1460.1	-0.2008	0.273	-0.2245	0.0741	-0.2324	0.0559	-0.0316	0.938	0	0	0	0	0	0	0	0	0
Tb927.5.4100	WD domain, G-beta repeat, putative	ZUnknown	689	-0.2007	0.45	-0.1696	0.39	-0.1253	0.517	0.0754	NA	0	0	0	0	0	0	0	0	0
Tb927.10.8930	paraflagellar rod protein PFC18	Cytoskeleton	2606.1	-0.2005	0.14	-0.199	0.0654	-0.1902	0.08	0.0102	0.993	0	0	0	0	0	0	0	0	0
Tb927.6.1530	Glutamine amidotransferase class-I, putative	ZUnknown	679.4	-0.2004	0.45	-0.1888	0.286	-0.1582	0.367	0.0422	NA	0	0	0	0	0	0	0	0	0
Tb927.11.10780	Voltage-dependent anion channel (VDAC), putative	Transporter	691.7	-0.2	0.471	-0.2876	0.0526	-0.342	0.00923	-0.142	NA	0	0	0	0	0	0	0	0	0
Tb927.11.480	small GTP-binding protein domain containing protein, putative	ZUnknown	653.3	-0.1995	0.494	-0.2623	0.0919	-0.2905	0.0414	-0.0911	NA	0	0	0	0	0	0	0	0	0
Tb927.9.6090	PTP1-interacting protein, 39 kDa PIP39	Protein.phosphatase	4007.3	-0.1995	0.15	-0.2206	0.0419	-0.2346	0.0216	-0.0351	0.924	0	0	0	0	0	0	0	0	0
Tb927.10.7410	succinyl-CoA ligase [GDP-forming] beta-chain, putative	Mito.citric.acid.cycle	3074.5	-0.1986	0.167	-0.2982	0.0149	-0.4045	4.49e-06	-0.2058	0.0795	0	0	0	0	0	1	0	0	1
Tb927.9.15330	U3 small nucleolar RNA-associated protein 6, putative	ZUnknown	1210	-0.1986	0.341	-0.2065	0.141	-0.199	0.148	-0.0004	0.999	0	0	0	0	0	0	0	0	0
Tb927.9.9290	PABP1	Translation	3240.3	-0.1983	0.143	-0.2788	0.0136	-0.3595	3.23e-05	-0.1612	0.223	0	0	0	0	0	0	0	0	0
Tb927.9.13480	Eukaryotic protein of unknown function (DUF1764), putative	ZUnknown	224.9	-0.1983	NA	-0.1969	0.455	-0.1414	0.565	0.0569	NA	0	0	0	0	0	0	0	0	0
Tb927.4.3710	Predicted membrane protein, putative	ZUnknown	155.9	-0.1983	NA	-0.1945	0.488	-0.1284	0.62	0.0699	NA	0	0	0	0	0	0	0	0	0
Tb927.11.16020	DRBD10	RNA.binding	949.7	-0.1981	0.369	-0.2788	0.0365	-0.3366	0.00349	-0.1385	0.491	0	0	0	0	0	0	0	0	0
Tb927.8.8280	hypothetical protein, conserved, no domains, K-specific	ZUnknown	956.1	-0.1974	0.403	-0.289	0.0384	-0.3609	0.00221	-0.1635	0.387	0	0	0	0	0	0	0	0	0
Tb927.10.9920	hypothetical protein, conserved	ZUnknown	577.5	-0.1972	NA	-0.3286	0.0356	-0.4364	0.000486	-0.2393	NA	0	0	0	0	0	1	0	0	1
Tb927.5.3430	SUMO-activating enzyme e1 UBA2	Ubiquitin.proteasome	1200.1	-0.1972	0.331	-0.1554	0.381	-0.1092	0.527	0.088	0.756	0	0	0	0	0	0	0	0	0
Tb927.8.4820	eIF4G3	Translation	2329.1	-0.1971	0.174	-0.2558	0.0212	-0.3057	0.00132	-0.1086	0.561	0	0	0	0	0	0	0	0	0
Tb927.6.1760	KU80 protein (KU80)	DNA	891.9	-0.1967	0.419	-0.2259	0.122	-0.2316	0.1	-0.0349	NA	0	0	0	0	0	0	0	0	0
Tb927.5.3820	aspartate carbamoyltransferase, putative	Nucleotides	1250.5	-0.1962	0.317	-0.2842	0.027	-0.3591	0.000654	-0.1629	0.326	0	0	0	0	0	0	0	0	0
Tb927.9.6580	hypothetical protein, conserved	ZUnknown	910.1	-0.1962	0.427	-0.2143	0.158	-0.2102	0.154	-0.014	0.99	0	0	0	0	0	0	0	0	0
Tb927.2.6000	GPI phospholipase C	GPI.anchors	2344.8	-0.196	0.174	-0.3298	0.0149	-0.4996	2.05e-09	-0.3036	0.00108	0	0	0	0	0	1	0	0	1
Tb927.11.14100	DRBD4 (PTB2)	RNA.binding	1985.9	-0.1958	0.19	-0.1375	0.415	-0.0797	0.62	0.1161	0.513	0	0	0	0	0	0	0	0	0
Tb927.3.1680	eIF3F	Translation	1649.6	-0.195	0.275	-0.234	0.0509	-0.2583	0.0214	-0.0633	0.836	0	0	0	0	0	0	0	0	0
Tb927.8.2710	SET domain containing protein, putative	ZUnknown	1135.6	-0.1949	0.36	-0.1846	0.226	-0.1619	0.283	0.033	0.938	0	0	0	0	0	0	0	0	0
Tb927.11.2630	diphthamide biosynthesis enzyme Dph1/Dph2 domain containing protein, putative	ZUnknown	1098.5	-0.1945	0.357	-0.1988	0.158	-0.1875	0.182	0.007	0.997	0	0	0	0	0	0	0	0	0
Tb927.7.2180	T. brucei spp.-specific protein, putative	ZUnknown	368.2	-0.1944	NA	-0.2495	0.181	-0.2533	0.143	-0.0589	NA	0	0	0	0	0	0	0	0	0
Tb927.2.2910	hypothetical protein, conserved	ZUnknown	473.2	-0.1925	NA	-0.2261	0.218	-0.2188	0.21	-0.0263	NA	0	0	0	0	0	0	0	0	0
Tb927.4.4550	hypothetical protein, conserved	ZUnknown	3264.9	-0.1922	0.164	-0.1601	0.226	-0.1253	0.332	0.067	0.802	0	0	0	0	0	0	0	0	0
Tb927.11.9050	p21-C-terminal region-binding protein, putative	ZUnknown	764	-0.192	0.462	-0.1535	0.442	-0.106	0.59	0.086	NA	0	0	0	0	0	0	0	0	0
Tb927.9.11960	hypothetical protein, conserved	ZUnknown	919.4	-0.1917	0.45	-0.2437	0.0867	-0.2702	0.04	-0.0785	0.813	0	0	0	0	0	0	0	0	0
Tb927.8.5590	SH3-binding, glutamic acid-rich protein, putative	ZUnknown	467.8	-0.1915	NA	-0.3054	0.0638	-0.3758	0.00745	-0.1843	NA	0	0	0	0	0	0	0	0	0
Tb927.3.3590	U3 small nucleolar ribonucleoprotein protein MPP10, putative	rRNA.tRNA.process	1272.9	-0.1913	0.427	-0.0897	0.759	0.0149	0.958	0.2062	0.217	0	0	0	0	0	0	0	0	0
Tb927.6.1080	glyoxalase II (glxII)	Redox	714.5	-0.1909	0.508	-0.2386	0.12	-0.2561	0.0752	-0.0653	NA	0	0	0	0	0	0	0	0	0
Tb927.10.9440	NADH dehydrogenase (54 NDH2) in TAO/G3PDH complex	Mito.e.transport	1537.6	-0.1909	0.306	-0.1534	0.342	-0.1115	0.485	0.0793	0.773	0	0	0	0	0	0	0	0	0
Tb927.11.2640	NOP53, Likely member of the Gnl3l family of of circularly permutated GTPases, ribosome biogenesis	rRNA.tRNA.process	534.3	-0.1906	NA	-0.2207	0.211	-0.2154	0.201	-0.0248	NA	0	0	0	0	0	0	0	0	0
Tb927.7.5620	SET domain containing protein, putative	ZUnknown	717.9	-0.1901	0.494	-0.175	0.339	-0.1439	0.419	0.0462	NA	0	0	0	0	0	0	0	0	0
Tb927.2.5800	sedoheptulose-1,7-bisphosphatase (SBPase)	Glucose.glycerol	987.5	-0.19	0.427	-0.2456	0.0741	-0.2777	0.0267	-0.0877	0.769	0	0	0	0	0	0	0	0	0
Tb927.11.8400	Mitochondrial RNA processing endonuclease 1 (mRPN1)	Mito.RNA	654.1	-0.1896	0.538	-0.2042	0.237	-0.1921	0.252	-0.0025	NA	0	0	0	0	0	0	0	0	0
Tb927.10.12830	acetyltransferase, putative	Lipids	369.9	-0.1893	NA	-0.1815	0.438	-0.1409	0.524	0.0483	NA	0	0	0	0	0	0	0	0	0
Tb927.9.7270	hypothetical protein	ZUnknown	193.1	-0.1876	NA	-0.2733	0.209	-0.2661	0.172	-0.0785	NA	0	0	0	0	0	0	0	0	0
Tb927.9.13520	Importin 1 (IMP1)	Nuclear.transport	2893	-0.1868	0.164	-0.1658	0.159	-0.1413	0.23	0.0456	0.881	0	0	0	0	0	0	0	0	0
Tb927.7.2100	GMP synthase	Nucleotides	1512.9	-0.1863	0.361	-0.1808	0.214	-0.1652	0.243	0.0211	0.966	0	0	0	0	0	0	0	0	0
Tb927.10.4500	mRNA capping methyltransferase, putative	RNA.processing	547.5	-0.1862	NA	-0.1123	0.706	-0.0339	0.907	0.1522	NA	0	0	0	0	0	0	0	0	0
Tb927.7.2520	Uncharacterised protein family UPF0066, putative	ZUnknown	431.8	-0.1861	NA	-0.2446	0.17	-0.2558	0.122	-0.0698	NA	0	0	0	0	0	0	0	0	0
Tb927.11.11680	2-oxoglutarate dehydrogenase E2 component, putative	Mito.citric.acid.cycle	1652.5	-0.1856	0.499	-0.3653	0.0249	-0.5973	1.62e-08	-0.4117	0.000402	0	0	0	0	0	1	0	1	1
Tb927.10.8320	cytochrome oxidase subunit IX (COXIX)	Mito.e.transport	397.9	-0.1855	NA	-0.1907	0.384	-0.1642	0.421	0.0214	NA	0	0	0	0	0	0	0	0	0
Tb927.10.2310	hypothetical protein, conserved	ZUnknown	811.6	-0.1853	0.501	-0.1951	0.226	-0.1848	0.239	0.0004	NA	0	0	0	0	0	0	0	0	0
Tb927.8.1260	NOP112	Cell.cycle	1812.6	-0.1853	0.277	-0.1522	0.318	-0.1162	0.424	0.0691	0.804	0	0	0	0	0	0	0	0	0
Tb927.8.2000	cyclophilin, putative (NCP1) (in PUF7-TAP)	Chaperone	1187.9	-0.1853	0.464	-0.0694	0.827	0.048	0.843	0.2333	0.112	0	0	0	0	0	0	0	0	0
Tb927.8.7130	hypothetical protein, conserved	ZUnknown	220.6	-0.1851	NA	-0.2319	0.322	-0.2104	0.315	-0.0253	NA	0	0	0	0	0	0	0	0	0
Tb927.4.2750	hypothetical protein, conserved	ZUnknown	833.4	-0.1846	0.502	-0.1915	0.237	-0.1792	0.256	0.0053	NA	0	0	0	0	0	0	0	0	0
Tb927.11.15630	NOL1/NOP2/sun family, putative	ZUnknown	612.6	-0.1845	NA	-0.1895	0.322	-0.1705	0.341	0.0139	NA	0	0	0	0	0	0	0	0	0
Tb927.7.6780	hypothetical protein	ZUnknown	354.5	-0.1839	NA	-0.2576	0.215	-0.27	0.141	-0.0861	NA	0	0	0	0	0	0	0	0	0
Tb927.6.4590	glutamyl-tRNA synthetase, putative	Translation.tRNA	3246.3	-0.1838	0.277	-0.2548	0.0374	-0.3249	0.000831	-0.1411	0.387	0	0	0	0	0	0	0	0	0
Tb927.4.1930	EIF3G	Translation	1539.4	-0.1838	0.389	-0.1508	0.387	-0.1123	0.504	0.0715	0.815	0	0	0	0	0	0	0	0	0
Tb927.1.2670	flagellar protein PF16	Cytoskeleton	3006.5	-0.1835	0.247	-0.2292	0.0419	-0.2681	0.00687	-0.0846	0.721	0	0	0	0	0	0	0	0	0
Tb927.10.11530	hypothetical protein, conserved	ZUnknown	299.6	-0.1835	NA	-0.1763	0.488	-0.1327	0.577	0.0509	NA	0	0	0	0	0	0	0	0	0
Tb927.7.290	leucine-rich repeat protein (LRRP)	LRRP	636	-0.1834	NA	-0.1492	0.495	-0.1028	0.623	0.0805	NA	0	0	0	0	0	0	0	0	0
Tb927.11.180	electron transfer flavoprotein, putative	Mito.e.transport	339.2	-0.1833	NA	-0.2418	0.235	-0.2479	0.177	-0.0646	NA	0	0	0	0	0	0	0	0	0
Tb927.2.2830	hypothetical protein, conserved	ZUnknown	413.6	-0.1832	NA	-0.1244	0.671	-0.0535	0.853	0.1297	NA	0	0	0	0	0	0	0	0	0
Tb927.8.3500	MMS19, Fe-S cluster biogenesis	Enzyme	1898.1	-0.183	0.468	-0.2494	0.089	-0.3063	0.0122	-0.1233	0.614	0	0	0	0	0	0	0	0	0
Tb927.8.4170	RNA-binding protein MRD1	rRNA.tRNA.process	1195.8	-0.1821	0.403	-0.1174	0.576	-0.052	0.808	0.13	0.509	0	0	0	0	0	0	0	0	0
Tb927.5.3360	Mitchondrial LSU ribosomal protein L2, putative	Mito.translation	675.8	-0.182	0.57	-0.1485	0.489	-0.1036	0.618	0.0784	NA	0	0	0	0	0	0	0	0	0
Tb927.9.10880	hypothetical protein, conserved	ZUnknown	462	-0.1814	NA	-0.1936	0.338	-0.174	0.359	0.0074	NA	0	0	0	0	0	0	0	0	0
Tb927.11.2120	CBF/Mak21 family, putative	ZUnknown	1607.9	-0.1812	0.357	-0.2136	0.0843	-0.2317	0.0467	-0.0505	0.885	0	0	0	0	0	0	0	0	0
Tb927.6.4750	hypothetical protein, conserved	ZUnknown	869	-0.1811	0.591	-0.2635	0.106	-0.3207	0.0188	-0.1395	NA	0	0	0	0	0	0	0	0	0
Tb927.10.170	pseudouridine synthase, Cbf5p	rRNA.tRNA.process	2309	-0.181	0.261	-0.2274	0.0417	-0.2636	0.00764	-0.0826	0.722	0	0	0	0	0	0	0	0	0
Tb927.10.5670	N-acetyltransferase subunit Nat1, putative (NAT1)	Enzyme	1856.1	-0.1809	0.345	-0.1708	0.223	-0.1536	0.258	0.0273	0.945	0	0	0	0	0	0	0	0	0
Tb927.11.7770	oxidoreductase-like protein	Enzyme	1550	-0.1808	0.355	-0.1833	0.167	-0.1751	0.178	0.0058	0.997	0	0	0	0	0	0	0	0	0
Tb927.2.2770	hypothetical protein, conserved	ZUnknown	1420.6	-0.1801	0.551	-0.332	0.0416	-0.5153	3.7e-06	-0.3352	0.00924	0	0	0	0	0	1	0	0	1
Tb927.10.12000	iron-sulfur cluster assembly protein, ISD11, needed foraconitatase, fumarase & thiolation of mitochodrial and cytosolic tRNA	Mito.pathway	266.2	-0.18	NA	-0.2527	0.241	-0.2531	0.192	-0.0731	NA	0	0	0	0	0	0	0	0	0
Tb927.11.5680	dynein light chain, putative	Cytoskeleton	836.7	-0.1798	0.551	-0.1573	0.432	-0.1231	0.516	0.0568	NA	0	0	0	0	0	0	0	0	0
Tb927.1.4830	Phospholipase A1	Lipids	1522.2	-0.1793	0.57	0.0267	0.957	0.3244	0.0147	0.5037	1.43e-05	0	0	0	0	0	0	1	0	1
Tb927.7.1480	hypothetical protein, conserved	ZUnknown	471	-0.1786	NA	-0.1583	0.485	-0.1183	0.587	0.0603	NA	0	0	0	0	0	0	0	0	0
Tb927.9.13770	proteasome complex subunit Rpn13 ubiquitin receptor, putative	ZUnknown	643.4	-0.1784	NA	-0.2193	0.181	-0.2298	0.132	-0.0514	NA	0	0	0	0	0	0	0	0	0
Tb927.10.13030	calpain-like cysteine peptidase, putative,cysteine peptidase, Clan CA, family C2, putative	Protease	857.8	-0.1784	0.593	-0.2153	0.206	-0.227	0.142	-0.0486	NA	0	0	0	0	0	0	0	0	0
Tb927.9.5020	HMG-box domain containing protein, putative	ZUnknown	781	-0.178	0.551	-0.2498	0.0907	-0.2937	0.0233	-0.1157	NA	0	0	0	0	0	0	0	0	0
Tb927.3.1490	leucine-rich repeat protein (LRRP)	LRRP	857.1	-0.1778	0.671	-0.1765	0.438	-0.1568	0.43	0.021	NA	0	0	0	0	0	0	0	0	0
Tb927.3.2980	mitochondrial carrier protein, MCP17	Mito.transport	385.8	-0.177	NA	-0.1966	0.356	-0.1784	0.366	-0.0014	NA	0	0	0	0	0	0	0	0	0
Tb927.5.1820	40S ribosomal protein S4	Ribosome	1570.6	-0.1767	0.45	0.0186	0.971	0.2913	0.0118	0.4679	1.94e-06	0	0	0	0	0	0	1	0	1
Tb927.3.4380	Tob55, SAM50	Mito.biogenesis	554.3	-0.1765	NA	-0.1855	0.355	-0.1678	0.37	0.0088	NA	0	0	0	0	0	0	0	0	0
Tb927.6.3180	hypothetical protein, conserved	ZUnknown	2521.8	-0.1764	0.357	-0.0963	0.677	-0.0164	0.945	0.16	0.313	0	0	0	0	0	0	0	0	0
Tb927.5.4420	nucleolar RNA helicase 2 human, DDX50 Mouse	rRNA.tRNA.process	2608.1	-0.1763	0.346	-0.217	0.0753	-0.2493	0.0208	-0.0729	0.797	0	0	0	0	0	0	0	0	0
Tb927.5.2010	hypothetical protein	ZUnknown	361.8	-0.1755	NA	-0.3195	0.0882	-0.4176	0.00604	-0.2421	NA	0	0	0	0	0	1	0	0	1
Tb927.11.16620	hypothetical protein, conserved	ZUnknown	539.5	-0.1753	NA	-0.1306	0.596	-0.0758	0.757	0.0995	NA	0	0	0	0	0	0	0	0	0
Tb927.11.12160	hypothetical protein, conserved	Mito.pathway	263.2	-0.1752	NA	-0.088	0.819	0.0111	0.975	0.1863	NA	0	0	0	0	0	0	0	0	0
Tb927.2.1790	hypothetical protein, conserved	ZUnknown	210.1	-0.1747	NA	-0.0946	0.803	-0.0011	0.998	0.1736	NA	0	0	0	0	0	0	0	0	0
Tb927.7.280	cyclophilin-type peptidyl-prolyl cis-trans isomerase, putative (PPIase)	Chaperone	347.3	-0.1745	NA	-0.2971	0.112	-0.3613	0.0223	-0.1868	NA	0	0	0	0	0	0	0	0	0
Tb927.9.1400	Monooxygenase, putative	Enzyme	730.7	-0.1745	0.586	-0.1454	0.48	-0.106	0.597	0.0685	NA	0	0	0	0	0	0	0	0	0
Tb927.11.1720	hypothetical protein, conserved	ZUnknown	587.8	-0.1739	NA	-0.1612	0.447	-0.1309	0.515	0.043	NA	0	0	0	0	0	0	0	0	0
Tb927.2.2590	hypothetical protein, conserved	ZUnknown	163.6	-0.1739	NA	-0.1339	0.694	-0.0607	0.85	0.1132	NA	0	0	0	0	0	0	0	0	0
Tb927.10.5860	hypothetical protein, conserved	ZUnknown	494.5	-0.1739	NA	-0.1336	0.593	-0.0813	0.738	0.0926	NA	0	0	0	0	0	0	0	0	0
Tb927.11.8270	hypothetical protein, conserved	ZUnknown	1490.9	-0.1736	0.506	-0.2177	0.129	-0.2467	0.0541	-0.0731	0.824	0	0	0	0	0	0	0	0	0
Tb927.10.1960	hypothetical protein, conserved	ZUnknown	1381.3	-0.1733	0.452	-0.2027	0.133	-0.2167	0.0869	-0.0434	0.912	0	0	0	0	0	0	0	0	0
Tb927.10.8330	S. cerevisiae PSP1 homologue, putative	ZUnknown	563.3	-0.1732	NA	-0.1507	0.527	-0.1102	0.621	0.063	NA	0	0	0	0	0	0	0	0	0
Tb927.3.1920	NOT5	RNA.degradation	3122.4	-0.173	0.346	-0.2152	0.077	-0.2491	0.0179	-0.0761	0.773	0	0	0	0	0	0	0	0	0
Tb927.11.11470	KRIPP14 Mitchondrial SSU ribosomal associated (PPR)	Mito.translation	384.2	-0.173	NA	-0.1352	0.619	-0.0808	0.76	0.0922	NA	0	0	0	0	0	0	0	0	0
Tb927.7.5760	MTR2	Nuclear.transport	253.4	-0.1728	NA	-0.2859	0.157	-0.3267	0.0583	-0.1539	NA	0	0	0	0	0	0	0	0	0
Tb927.6.3580	RECQ1 ATP-dependent DEAD/H DNA helicase	DNA	1128.8	-0.1727	0.523	-0.1956	0.19	-0.201	0.15	-0.0283	0.948	0	0	0	0	0	0	0	0	0
Tb927.11.8420	DnaJ domain containing protein, putative	ZUnknown	292.6	-0.1727	NA	-0.1172	0.717	-0.046	0.884	0.1267	NA	0	0	0	0	0	0	0	0	0
Tb927.11.1080	NOP60	Cell.cycle	1210	-0.1726	0.502	-0.1615	0.337	-0.1403	0.379	0.0322	0.939	0	0	0	0	0	0	0	0	0
Tb927.9.4360	KREL1	Mito.RNA	738.2	-0.1725	0.625	-0.1468	0.497	-0.1089	0.601	0.0636	NA	0	0	0	0	0	0	0	0	0
Tb927.7.4120	hypothetical protein, conserved, no domains, K-specific	ZUnknown	1746.8	-0.1724	0.403	-0.1892	0.147	-0.1947	0.117	-0.0223	0.961	0	0	0	0	0	0	0	0	0
Tb927.8.6610	hypothetical protein, conserved	ZUnknown	391.8	-0.1722	NA	-0.1971	0.356	-0.1831	0.35	-0.0108	NA	0	0	0	0	0	0	0	0	0
Tb927.11.530	RBP3	RNA.binding	1190.6	-0.1718	0.57	-0.3466	0.0329	-0.5566	1.15e-07	-0.3849	0.000796	0	0	0	0	0	1	0	1	1
Tb927.3.5410	hypothetical protein, conserved, no clear yeast or human matches	ZUnknown	140.4	-0.1717	NA	-0.2228	0.399	-0.1937	0.395	-0.022	NA	0	0	0	0	0	0	0	0	0
Tb927.9.12410	riboflavin kinase, putative	Enzyme	322.1	-0.1715	NA	-0.3034	0.123	-0.3766	0.0204	-0.205	NA	0	0	0	0	0	0	0	0	0
Tb927.10.9200	Nuclease-related domain containing protein, putative	ZUnknown	454.9	-0.1714	NA	-0.1776	0.406	-0.1561	0.426	0.0153	NA	0	0	0	0	0	0	0	0	0
Tb927.8.640	Dpy-30 motif containing protein, putative	ZUnknown	215.4	-0.1712	NA	-0.1835	0.495	-0.1457	0.55	0.0255	NA	0	0	0	0	0	0	0	0	0
Tb927.10.4280	Complex III cytochrome b/c complex, Cytochrome bd ubiquinol oxidase, 14kDa subunit	Mito.e.transport	189.4	-0.1712	NA	-0.174	0.536	-0.1302	0.61	0.041	NA	0	0	0	0	0	0	0	0	0
Tb927.6.220	purine nucleoside transporter NT9	Nucleotides	288.8	-0.1712	NA	-0.1586	0.55	-0.114	0.643	0.0571	NA	0	0	0	0	0	0	0	0	0
Tb927.11.10940	hypothetical protein, conserved, no domains	ZUnknown	1212	-0.171	0.625	-0.1494	0.495	-0.117	0.56	0.054	0.902	0	0	0	0	0	0	0	0	0
Tb927.8.1430	Mitchondrial SSU ribosomal protein	Mito.translation	266.7	-0.171	NA	-0.1413	0.643	-0.0831	0.771	0.0879	NA	0	0	0	0	0	0	0	0	0
Tb927.10.6680	member of the NOL1/NOP2/sun family (S-adenosyl methionine methyltransferases)	Enzyme	1506.6	-0.1708	0.451	-0.2227	0.0878	-0.2599	0.0233	-0.0891	0.735	0	0	0	0	0	0	0	0	0
Tb927.6.3210	adenylate kinase in T. cruzi, nuclear	Nucleotides	206.8	-0.1705	NA	-0.1922	0.475	-0.155	0.519	0.0155	NA	0	0	0	0	0	0	0	0	0
Tb927.11.1310	NADH-cytochrome b5 reductase, putative (B5R)	Mito.e.transport	502	-0.1704	NA	-0.3113	0.0791	-0.4271	0.00199	-0.2567	NA	0	0	0	0	0	1	0	0	1
Tb927.7.5550	hypothetical protein, conserved, TLD domain	Enzyme	420.4	-0.17	NA	-0.2056	0.33	-0.203	0.28	-0.033	NA	0	0	0	0	0	0	0	0	0
Tb927.4.730	Peptidase family C78, putative	ZUnknown	856.1	-0.1699	0.595	-0.0516	0.883	0.0635	0.782	0.2333	NA	0	0	0	0	0	0	0	0	0
Tb927.9.7470	purine nucleoside transporter NT10	Nucleotides	623.5	-0.1696	NA	-0.2272	0.243	-0.2521	0.133	-0.0824	NA	0	0	0	0	0	0	0	0	0
Tb927.4.2390	ATP-dependent DEAD/H RNA helicase, putative, no clear yeast homologue, resembles Prp43 and Prp22	RNA.processing	1405.6	-0.1696	0.45	-0.1696	0.232	-0.1592	0.25	0.0104	0.994	0	0	0	0	0	0	0	0	0
Tb927.3.3240	hypothetical protein, conserved	ZUnknown	272.9	-0.1695	NA	-0.1906	0.438	-0.1669	0.445	0.0025	NA	0	0	0	0	0	0	0	0	0
Tb927.11.7680	hypothetical protein, conserved	ZUnknown	652.8	-0.1693	0.639	-0.163	0.414	-0.139	0.457	0.0304	NA	0	0	0	0	0	0	0	0	0
Tb927.9.11250	predicted WD40 repeat protein	ZUnknown	1001.6	-0.1692	0.595	-0.2507	0.0962	-0.3124	0.0131	-0.1432	0.512	0	0	0	0	0	0	0	0	0
Tb927.8.810	radial spoke protein RSP9, putative	Cytoskeleton	834.4	-0.1692	0.575	-0.0698	0.822	0.0277	0.914	0.1969	NA	0	0	0	0	0	0	0	0	0
Tb927.7.7070	MYND finger, putative	Zinc.finger	1079.8	-0.1691	0.575	-0.1799	0.286	-0.1747	0.264	-0.0056	0.998	0	0	0	0	0	0	0	0	0
Tb927.7.4220	WD domain, G-beta repeat/Dip2/Utp12 Family, putative	ZUnknown	2619.6	-0.1691	0.331	-0.1222	0.472	-0.0747	0.637	0.0944	0.654	0	0	0	0	0	0	0	0	0
Tb927.9.9420	hypothetical protein, conserved	ZUnknown	606.3	-0.1687	NA	-0.2185	0.193	-0.2363	0.121	-0.0676	NA	0	0	0	0	0	0	0	0	0
Tb927.8.7970	hypothetical protein, brucei-evansi-specific	ZUnknown	2916.8	-0.1686	0.32	-0.2122	0.0614	-0.2476	0.0118	-0.079	0.737	0	0	0	0	0	0	0	0	0
Tb927.10.2320	TbNup41 Outer ring	Nuclear.transport	642.6	-0.1684	NA	-0.0999	0.724	-0.029	0.915	0.1394	NA	0	0	0	0	0	0	0	0	0
Tb927.9.5150	SNU13 homologue. mRNA splciing and ribosome biogenesis	RNA.processing	1402.7	-0.1683	0.687	-0.1709	0.437	-0.1594	0.398	0.0088	0.997	0	0	0	0	0	0	0	0	0
Tb927.11.13120	PUB domain containing protein, putative	ZUnknown	414.2	-0.1683	NA	-0.1538	0.531	-0.1148	0.619	0.0534	NA	0	0	0	0	0	0	0	0	0
Tb927.2.2230	hypothetical protein, conserved, no domains, Kineto-specific	ZUnknown	976.3	-0.1681	0.576	-0.1931	0.222	-0.1995	0.173	-0.0314	0.944	0	0	0	0	0	0	0	0	0
Tb927.9.15850	hypothetical protein	ZUnknown	990.8	-0.1679	0.83	-0.2267	0.278	-0.1145	0.672	0.0534	0.927	0	0	0	0	0	0	0	0	0
Tb927.10.6630	ATP-dependent DEAD/H RNA helicase DBP2	RNA.helicase	1779.1	-0.1675	0.465	-0.2972	0.0419	-0.4465	3.4e-06	-0.279	0.0123	0	0	0	0	0	1	0	0	1
Tb927.1.2330	beta tubulin	Cytoskeleton	159012	-0.1674	0.794	-0.0672	0.842	0.0682	0.821	0.2356	0.341	0	0	0	0	0	0	0	0	0
Tb927.10.7710	40S ribosomal protein S8	Ribosome	859.3	-0.1671	0.62	-0.2256	0.152	-0.2594	0.0601	-0.0923	NA	0	0	0	0	0	0	0	0	0
Tb927.10.14280	mitochondrial carrier protein, MCP20	Mito.transport	299.8	-0.1671	NA	-0.1423	0.627	-0.0918	0.734	0.0753	NA	0	0	0	0	0	0	0	0	0
Tb927.11.890	hypothetical protein, conserved	ZUnknown	6670.5	-0.1671	0.181	-0.1407	0.24	-0.1129	0.323	0.0541	0.827	0	0	0	0	0	0	0	0	0
Tb927.10.4400	hypothetical protein, conserved, no domains, kinetoplastid specific	ZUnknown	146.3	-0.1669	NA	-0.2555	0.282	-0.2433	0.239	-0.0764	NA	0	0	0	0	0	0	0	0	0
Tb927.10.2120	U1C small nuclear ribonucleoprotein C	RNA.processing	139.8	-0.1666	NA	-0.1502	0.65	-0.0889	0.764	0.0776	NA	0	0	0	0	0	0	0	0	0
Tb927.11.14060	hypothetical protein, conserved	ZUnknown	429	-0.1664	NA	-0.0727	0.833	0.0223	0.944	0.1887	NA	0	0	0	0	0	0	0	0	0
Tb927.2.3880	HNRNPH/F	RNA.processing	1570.2	-0.1663	0.468	-0.2921	0.0416	-0.4305	7.4e-06	-0.2642	0.0178	0	0	0	0	0	1	0	0	1
Tb927.9.10630	hypothetical protein, conserved	ZUnknown	378	-0.1662	NA	-0.2392	0.237	-0.2647	0.13	-0.0985	NA	0	0	0	0	0	0	0	0	0
Tb927.10.9130	pre-mRNA splicing factor ATP-dependent RNA helicase, putative	rRNA.tRNA.processing	1259.8	-0.1658	0.502	-0.197	0.147	-0.2121	0.0929	-0.0463	0.9	0	0	0	0	0	0	0	0	0
Tb927.11.1420	hypothetical protein, conserved	ZUnknown	2482.9	-0.1654	0.402	-0.1741	0.185	-0.1754	0.15	-0.01	0.994	0	0	0	0	0	0	0	0	0
Tb927.2.4560	TBC-D2 likely GAP	Signalling	562.8	-0.1654	NA	-0.1662	0.444	-0.1456	0.465	0.0197	NA	0	0	0	0	0	0	0	0	0
Tb927.9.6760	hypothetical protein, conserved	ZUnknown	195.7	-0.1653	NA	-0.0928	0.811	-0.0051	0.99	0.1602	NA	0	0	0	0	0	0	0	0	0
Tb927.11.460	predicted WD40 repeat protein	ZUnknown	1440.4	-0.165	0.532	-0.1706	0.274	-0.1651	0.255	-0.0001	0.999	0	0	0	0	0	0	0	0	0
Tb927.6.830	hypothetical protein, conserved	ZUnknown	235.8	-0.1649	NA	-0.1853	0.49	-0.1516	0.529	0.0133	NA	0	0	0	0	0	0	0	0	0
Tb927.11.14310	small nuclear ribonucleoprotein Sm-G	RNA.processing	366.8	-0.1647	NA	-0.1599	0.514	-0.1253	0.59	0.0394	NA	0	0	0	0	0	0	0	0	0
Tb927.11.3070	RRB1 homologue, involved in early stages of ribosome biogenesis.	rRNA.tRNA.process	2038.5	-0.1646	0.464	-0.0889	0.719	-0.0131	0.958	0.1515	0.373	0	0	0	0	0	0	0	0	0
Tb927.7.6710	hypothetical protein	ZUnknown	322.1	-0.1639	NA	-0.2008	0.457	-0.4961	0.00108	-0.3321	NA	0	0	0	0	0	1	0	0	1
Tb927.4.4040	hypothetical protein, conserved	Cytoskeleton	1484.5	-0.1638	0.524	-0.2824	0.0486	-0.4044	6.17e-05	-0.2407	0.0516	0	0	0	0	0	1	0	0	1
Tb927.9.15270	hypothetical protein, conserved, only match is to hypothetical protein ACA1_387870 [Acanthamoeba castellanii str. Neff]	Mito.pathway	811.2	-0.1637	0.627	-0.2038	0.206	-0.2204	0.129	-0.0567	NA	0	0	0	0	0	0	0	0	0
Tb927.11.6880	3-UTR of 11.6890	3UTR	223.4	-0.1636	NA	-0.2368	0.332	-0.2328	0.262	-0.0692	NA	0	0	0	0	0	0	0	0	0
Tb927.5.1970	hypothetical protein, T. brucei-specific, no domains	ZUnknown	335.5	-0.1635	NA	-0.2724	0.16	-0.3266	0.0443	-0.1631	NA	0	0	0	0	0	0	0	0	0
Tb927.10.9730	hypothetical protein, conserved	ZUnknown	685.2	-0.1635	0.681	-0.2646	0.0949	-0.3388	0.00849	-0.1753	NA	0	0	0	0	0	0	0	0	0
Tb927.10.5920	hypothetical protein, conserved	ZUnknown	1048.6	-0.1635	0.563	-0.1332	0.483	-0.097	0.597	0.0664	0.836	0	0	0	0	0	0	0	0	0
Tb927.1.1620	ATP-dependent DEAD/H RNA helicase, putative, no clear yeast homologue	RNA.helicase	1752.8	-0.1633	0.427	-0.1252	0.469	-0.0857	0.602	0.0777	0.765	0	0	0	0	0	0	0	0	0
Tb927.8.1750	DRE2, iron-sulfur cluster Fe-S	Enzyme	765.7	-0.1632	0.667	-0.1475	0.476	-0.1192	0.539	0.044	NA	0	0	0	0	0	0	0	0	0
Tb927.5.840	KRI1-like family/KRI1-like family C-terminal, putative	ZUnknown	1583.3	-0.1624	0.537	-0.1131	0.591	-0.0615	0.764	0.1009	0.693	0	0	0	0	0	0	0	0	0
Tb927.11.13300	Intraflagellar transport protein 25 IFT25	Cytoskeleton	453	-0.1621	NA	-0.1533	0.529	-0.121	0.596	0.0411	NA	0	0	0	0	0	0	0	0	0
Tb927.10.11290	hypothetical protein, conserved	ZUnknown	362.7	-0.162	NA	-0.1956	0.385	-0.185	0.359	-0.023	NA	0	0	0	0	0	0	0	0	0
Tb927.10.12440	kinesin, putative	Cytoskeleton	1060.2	-0.1619	0.596	-0.1931	0.21	-0.2055	0.143	-0.0436	0.918	0	0	0	0	0	0	0	0	0
Tb927.11.630	RPA2 RNA polymerase I second largest subunit (RPA134)	RNA.synthesis	4755.8	-0.1616	0.263	-0.172	0.104	-0.1777	0.0759	-0.0161	0.97	0	0	0	0	0	0	0	0	0
Tb927.10.360	hypothetical protein, conserved	ZUnknown	505.3	-0.1614	NA	-0.1904	0.337	-0.1876	0.297	-0.0262	NA	0	0	0	0	0	0	0	0	0
Tb927.9.15290	CHAT domain containing protein, putative	ZUnknown	4496.1	-0.1613	0.589	-0.277	0.0772	-0.402	0.000272	-0.2407	0.0989	0	0	0	0	0	1	0	0	1
Tb927.11.17010	Rab5-interacting protein (Rab5ip), putative	ZUnknown	421.4	-0.1613	NA	-0.2447	0.239	-0.279	0.115	-0.1178	NA	0	0	0	0	0	0	0	0	0
Tb927.9.13580	hypothetical protein, conserved	Mito.pathway	415.3	-0.161	NA	-0.1951	0.359	-0.1919	0.313	-0.0309	NA	0	0	0	0	0	0	0	0	0
Tb927.10.470	choline dehydrogenase, putative	Amino.acids	464.3	-0.1606	NA	-0.2014	0.341	-0.2053	0.268	-0.0446	NA	0	0	0	0	0	0	0	0	0
Tb927.9.1420	hypothetical protein, conserved	ZUnknown	467.1	-0.1606	NA	-0.1748	0.424	-0.161	0.414	-0.0004	NA	0	0	0	0	0	0	0	0	0
Tb927.8.2210	pteridine reductase (PTR1)	Folate	753.2	-0.1603	0.67	-0.2086	0.199	-0.231	0.111	-0.0707	NA	0	0	0	0	0	0	0	0	0
Tb927.11.6790	NOP89, BOP1/Erb1p	rRNA.tRNA.process	2466	-0.1602	0.45	-0.2271	0.0741	-0.2861	0.00476	-0.1259	0.474	0	0	0	0	0	0	0	0	0
Tb927.10.770	RF-1 domain containing protein, putative	Mito.pathway	765.7	-0.1602	0.697	-0.1829	0.325	-0.1832	0.269	-0.0231	NA	0	0	0	0	0	0	0	0	0
Tb927.5.4450	hypothetical protein, conserved	ZUnknown	456.8	-0.1602	NA	-0.1198	0.668	-0.0674	0.801	0.0928	NA	0	0	0	0	0	0	0	0	0
Tb927.11.7850	hypothetical protein, conserved	ZUnknown	306.6	-0.1597	NA	-0.133	0.66	-0.0831	0.766	0.0766	NA	0	0	0	0	0	0	0	0	0
Tb927.2.5060	GTP binding protein, putative	Enzyme	2427.7	-0.159	0.57	-0.206	0.167	-0.2448	0.0496	-0.0858	0.773	0	0	0	0	0	0	0	0	0
Tb927.10.14450	hypothetical protein, conserved	ZUnknown	344.3	-0.1589	NA	-0.0944	0.784	-0.0201	0.955	0.1387	NA	0	0	0	0	0	0	0	0	0
Tb927.1.1300	hypothetical transmembrane protein, conserved	ZUnknown	301.1	-0.1588	NA	-0.1665	0.515	-0.1353	0.566	0.0235	NA	0	0	0	0	0	0	0	0	0
Tb927.10.13430	citrate synthase, putative	Mito.citric.acid.cycle	457.3	-0.1587	NA	-0.2302	0.219	-0.2612	0.107	-0.1026	NA	0	0	0	0	0	0	0	0	0
Tb927.11.5010	TFIIF-stimulated CTD phosphatase, putative	Protein.phosphatase	583.6	-0.1587	NA	-0.1636	0.446	-0.1481	0.443	0.0106	NA	0	0	0	0	0	0	0	0	0
Tb927.1.2640	hypothetical protein, conserved	ZUnknown	530.8	-0.1586	NA	-0.2811	0.111	-0.3723	0.00784	-0.2137	NA	0	0	0	0	0	0	0	0	0
Tb927.11.13150	UEV domain/Zinc finger, C3HC4 type (RING finger), putative	ZUnknown	353.5	-0.1586	NA	-0.1577	0.538	-0.1257	0.597	0.0329	NA	0	0	0	0	0	0	0	0	0
Tb927.11.6280	pyruvate phosphate dikinase (PPDK)	Glucose.glycerol	1181.5	-0.1585	0.604	-0.1265	0.524	-0.089	0.638	0.0695	0.836	0	0	0	0	0	0	0	0	0
Tb927.1.3310	hypothetical protein, conserved, no human or yeast homologue	ZUnknown	891.7	-0.1584	0.697	-0.1735	0.359	-0.1699	0.317	-0.0116	NA	0	0	0	0	0	0	0	0	0
Tb927.8.6120	hypothetical protein, conserved	ZUnknown	605.8	-0.1582	NA	-0.2144	0.218	-0.2391	0.119	-0.0809	NA	0	0	0	0	0	0	0	0	0
Tb927.11.10080	Mitchondrial LSU ribosomal protein	Mito.translation	194.3	-0.1582	NA	-0.1619	0.584	-0.1228	0.636	0.0355	NA	0	0	0	0	0	0	0	0	0
Tb927.10.640	arginine N-methyltransferase, type II (PRMT5)	Arg.methylation	1422.6	-0.1582	0.529	-0.1203	0.512	-0.0798	0.651	0.0784	0.774	0	0	0	0	0	0	0	0	0
Tb927.10.510	ATOM19 (=LOK1=POMP19)	Mito.biogenesis	589.9	-0.1579	NA	-0.222	0.2	-0.2517	0.0982	-0.0938	NA	0	0	0	0	0	0	0	0	0
Tb927.7.610	DNA ligase, putative,mitochondrial DNA ligase homolog, putative	DNA	3262.2	-0.1578	0.346	-0.0789	0.729	-0.0012	0.996	0.1566	0.222	0	0	0	0	0	0	0	0	0
Tb927.5.3720	hypothetical protein, conserved	ZUnknown	185.7	-0.1577	NA	-0.0384	0.934	0.0853	0.772	0.243	NA	0	0	0	0	0	0	0	0	0
Tb927.6.2510	Flavinator of succinate dehydrogenase, putative	Mito.pathway	451	-0.1575	NA	-0.2136	0.325	-0.226	0.223	-0.0685	NA	0	0	0	0	0	0	0	0	0
Tb927.5.1710	ribonucleoprotein p18, mitochondrial precursor, putative	Mito.RNA	1086.8	-0.1573	0.623	-0.25	0.0931	-0.3277	0.00486	-0.1705	0.34	0	0	0	0	0	0	0	0	0
Tb927.5.288b	ribulose-phosphate 3-epimerase, putative	PPP	359.1	-0.1568	NA	-0.1957	0.384	-0.1935	0.326	-0.0366	NA	0	0	0	0	0	0	0	0	0
Tb927.11.8030	hypothetical protein, conserved	ZUnknown	1214.1	-0.1567	0.604	-0.0958	0.692	-0.0333	0.89	0.1234	0.582	0	0	0	0	0	0	0	0	0
Tb927.8.3590	hypothetical protein, conserved	Cytoskeleton	1508.7	-0.1563	0.57	-0.1926	0.184	-0.215	0.0921	-0.0587	0.864	0	0	0	0	0	0	0	0	0
Tb927.3.590	adenosine transporter AT-E or NT12.1	Nucleotides	163.5	-0.1562	NA	-0.2318	0.355	-0.2221	0.297	-0.0659	NA	0	0	0	0	0	0	0	0	0
Tb927.11.5250	hypothetical protein, conserved	ZUnknown	2701.7	-0.1562	0.4	-0.1962	0.0882	-0.2283	0.0229	-0.0721	0.769	0	0	0	0	0	0	0	0	0
Tb927.6.3170	hypothetical protein, conserved	ZUnknown	692.2	-0.1562	0.754	-0.1597	0.472	-0.1445	0.467	0.0116	NA	0	0	0	0	0	0	0	0	0
Tb927.9.1510	D-ala D-ala ligase C-terminus/SET domain containing protein, putative	ZUnknown	894.2	-0.1561	0.697	-0.2261	0.158	-0.2724	0.046	-0.1163	NA	0	0	0	0	0	0	0	0	0
Tb927.11.1580	hypothetical protein, conserved	ZUnknown	1068.5	-0.1561	0.62	-0.1834	0.232	-0.193	0.173	-0.0369	0.927	0	0	0	0	0	0	0	0	0
Tb927.9.3280	acidocalcisomal exopolyphosphatase	Calcium	861.9	-0.156	0.683	-0.1391	0.492	-0.1113	0.557	0.0447	NA	0	0	0	0	0	0	0	0	0
Tb927.7.3870	hypothetical protein, conserved	ZUnknown	639.6	-0.1559	NA	-0.2818	0.106	-0.3879	0.00346	-0.232	NA	0	0	0	0	0	1	0	0	1
Tb927.11.9740	tRNA intron endonuclease, catalytic C-terminal domain containing protein, putative	ZUnknown	504.4	-0.1559	NA	-0.1819	0.381	-0.1765	0.344	-0.0205	NA	0	0	0	0	0	0	0	0	0
Tb927.8.1600	lysyl-tRNA synthetase, putative	Translation.tRNA	4043.7	-0.1554	0.345	-0.2043	0.0638	-0.2493	0.00594	-0.0939	0.613	0	0	0	0	0	0	0	0	0
Tb927.11.8990	cation transporter, putative	Ions	328.4	-0.1553	NA	0.0039	0.992	0.1732	0.415	0.3285	NA	0	0	0	0	0	0	0	0	0
Tb927.6.2900	dendritic cell-derived IFNG-induced protein	ZUnknown	1228.9	-0.1552	0.596	-0.1797	0.227	-0.189	0.168	-0.0338	0.934	0	0	0	0	0	0	0	0	0
Tb927.11.15940	hypothetical protein, conserved	ZUnknown	1801	-0.155	0.494	-0.1462	0.326	-0.131	0.347	0.024	0.949	0	0	0	0	0	0	0	0	0
Tb927.11.5000	dynein intermediate chain IC78, putative	Cytoskeleton	2065.2	-0.1548	0.45	-0.1773	0.148	-0.1899	0.0948	-0.0351	0.923	0	0	0	0	0	0	0	0	0
Tb927.9.14480	dynein-associated protein, putative	Cytoskeleton	563.5	-0.1546	NA	-0.1329	0.596	-0.0963	0.674	0.0584	NA	0	0	0	0	0	0	0	0	0
Tb927.9.13780	Mitchondrial SSU ribosomal protein	Mito.translation	630.3	-0.1544	NA	-0.1866	0.322	-0.1932	0.247	-0.0388	NA	0	0	0	0	0	0	0	0	0
Tb927.7.6660	chaperone DNAj, putative, J10	Chaperone	217.6	-0.1544	NA	-0.1849	0.49	-0.1628	0.487	-0.0084	NA	0	0	0	0	0	0	0	0	0
Tb927.1.3050	tRNA (Uracil-5-)-methyltransferase, putative	ZUnknown	1488.5	-0.1543	0.556	-0.1812	0.195	-0.1952	0.123	-0.0409	0.914	0	0	0	0	0	0	0	0	0
Tb927.11.4230	hypothetical protein, conserved	ZUnknown	2389.1	-0.1542	0.427	-0.1236	0.437	-0.0911	0.538	0.063	0.813	0	0	0	0	0	0	0	0	0
Tb927.9.1520	hypothetical protein, conserved, no clear yeast or human matches	ZUnknown	519.6	-0.1541	NA	-0.1157	0.682	-0.0655	0.806	0.0887	NA	0	0	0	0	0	0	0	0	0
Tb927.1.2340	alpha tubulin	Cytoskeleton	160024	-0.1541	0.861	-0.0328	0.942	0.0958	0.723	0.2498	0.294	0	0	0	0	0	0	0	0	0
Tb927.10.11350	Mitchondrial LSU ribosomal protein	Mito.translation	231.6	-0.154	NA	-0.0855	0.822	-0.0051	0.99	0.1489	NA	0	0	0	0	0	0	0	0	0
Tb927.10.9430	phosphoribosylpyrophosphate synthetase, putative (PRS)	PPP	1886.8	-0.1537	0.513	-0.2433	0.066	-0.3279	0.000831	-0.1742	0.217	0	0	0	0	0	0	0	0	0
Tb927.8.7810	hypothetical protein, conserved	ZUnknown	270.4	-0.1537	NA	-0.1534	0.58	-0.1215	0.622	0.0323	NA	0	0	0	0	0	0	0	0	0
Tb927.11.7790	Mitchondrial SSU ribosomal protein	Mito.translation	798.5	-0.1536	0.739	-0.1258	0.611	-0.0883	0.688	0.0653	NA	0	0	0	0	0	0	0	0	0
Tb927.5.4400	hypothetical protein, conserved	ZUnknown	593.1	-0.1535	NA	-0.1625	0.428	-0.1506	0.417	0.0029	NA	0	0	0	0	0	0	0	0	0
Tb927.8.4760	KKT20 Kinetochore protein	Cell.cycle	276.7	-0.1534	NA	-0.1607	0.544	-0.131	0.586	0.0223	NA	0	0	0	0	0	0	0	0	0
Tb927.10.11280	hypothetical protein, T brucei brucei only	ZUnknown	18.5	-0.1533	NA	-0.1713	0.407	-0.0834	0.65	0.0699	NA	0	0	0	0	0	0	0	0	0
Tb927.5.2990	hypothetical protein, conserved	ZUnknown	441.6	-0.1533	NA	-0.171	0.447	-0.1584	0.43	-0.0051	NA	0	0	0	0	0	0	0	0	0
Tb927.4.3140	Homologue of yeast SDO1 and human SBDS, involved in 60S ribosome maturation	rRNA.tRNA.process	840.4	-0.1531	0.695	-0.1598	0.385	-0.151	0.369	0.0021	NA	0	0	0	0	0	0	0	0	0
Tb927.11.13500	paraflagellar rod protein par1	Cytoskeleton	6148.4	-0.1529	0.32	-0.0908	0.631	-0.0295	0.867	0.1234	0.383	0	0	0	0	0	0	0	0	0
Tb927.8.3520	hypothetical protein, conserved	ZUnknown	986.2	-0.1528	0.692	-0.1237	0.571	-0.0879	0.662	0.0649	0.862	0	0	0	0	0	0	0	0	0
Tb927.7.6450	tRNA-dihydrouridine synthase 3, putative	rRNA.tRNA.process	1214.7	-0.1526	0.62	-0.1404	0.438	-0.1198	0.475	0.0329	0.937	0	0	0	0	0	0	0	0	0
Tb927.8.3750	NOP56	rRNA.tRNA.process	2819.8	-0.1523	0.403	-0.2256	0.058	-0.2961	0.00092	-0.1438	0.3	0	0	0	0	0	0	0	0	0
Tb927.3.3910	RNApol Rpc34 family, pol III subunit, likely homologue of yeast RPC34	RNA.synthesis	425.8	-0.1522	NA	-0.0742	0.827	0.0062	0.986	0.1584	NA	0	0	0	0	0	0	0	0	0
Tb927.9.6150	protein phosphatase 2A regulatory subunit, putative	Protein.phosphatase	1276.8	-0.1517	0.607	-0.1569	0.332	-0.1509	0.31	0.0009	0.998	0	0	0	0	0	0	0	0	0
Tb927.11.4980	ATP-dependent DEAD/H RNA helicase, putative Dbp9, ribosome assembly?	rRNA.tRNA.process	897.5	-0.1517	0.697	-0.1095	0.643	-0.0631	0.778	0.0886	NA	0	0	0	0	0	0	0	0	0
Tb927.10.9110	hypothetical protein, conserved	ZUnknown	547.6	-0.1515	NA	-0.1983	0.313	-0.2143	0.204	-0.0628	NA	0	0	0	0	0	0	0	0	0
Tb927.2.4970	UV radiation resistance protein and autophagy-related subunit 14, putative	ZUnknown	807.5	-0.1515	0.7	-0.1639	0.362	-0.159	0.332	-0.0075	NA	0	0	0	0	0	0	0	0	0
Tb927.7.7090	hypothetical protein, conserved, no clear yeast or human matches	ZUnknown	226.2	-0.1515	NA	-0.1461	0.627	-0.107	0.682	0.0445	NA	0	0	0	0	0	0	0	0	0
Tb927.2.4710	TRRM1	RNA.processing	4184.7	-0.1514	0.45	-0.0634	0.813	0.0241	0.907	0.1755	0.185	0	0	0	0	0	0	0	0	0
Tb927.10.3230	protein kinase, putative	Protein.kinase	908.2	-0.1511	0.7	-0.1975	0.225	-0.222	0.121	-0.071	0.836	0	0	0	0	0	0	0	0	0
Tb927.10.14240	N-myristoyltransferase (NMT)	GPI.anchors	1385	-0.1511	0.629	-0.1656	0.323	-0.1679	0.255	-0.0168	0.98	0	0	0	0	0	0	0	0	0
Tb927.3.3510	hypothetical protein, conserved	ZUnknown	788.2	-0.1511	0.7	-0.0737	0.806	0.0026	0.993	0.1537	NA	0	0	0	0	0	0	0	0	0
Tb927.2.5190	HOP2 putative homologue, involved in meiosis?	DNA	326.9	-0.151	NA	-0.0228	0.961	0.1089	0.662	0.2599	NA	0	0	0	0	0	0	0	0	0
Tb927.10.8370	hypothetical protein, conserved	ZUnknown	230.3	-0.1506	NA	-0.2115	0.433	-0.2034	0.358	-0.0527	NA	0	0	0	0	0	0	0	0	0
Tb927.4.1820	selenocysteine-tRNA-specific elongation factor, putative	Translation	934.9	-0.1506	0.683	-0.1408	0.459	-0.1204	0.496	0.0302	0.945	0	0	0	0	0	0	0	0	0
Tb927.9.13140	hypothetical protein, conserved	ZUnknown	827.7	-0.1504	0.709	-0.1142	0.623	-0.0722	0.743	0.0782	NA	0	0	0	0	0	0	0	0	0
Tb927.6.4120	TBC-E likely GAP	Signalling	469.3	-0.1503	NA	-0.1575	0.495	-0.1382	0.515	0.0122	NA	0	0	0	0	0	0	0	0	0
Tb927.10.7840	hypothetical protein, conserved	ZUnknown	777	-0.15	0.717	-0.1895	0.254	-0.2055	0.17	-0.0555	NA	0	0	0	0	0	0	0	0	0
Tb927.5.4490	hypothetical protein, conserved	ZUnknown	200.2	-0.1498	NA	-0.2109	0.424	-0.1983	0.373	-0.0485	NA	0	0	0	0	0	0	0	0	0
Tb927.8.3790	paraflagellar rod protein PFC2	Cytoskeleton	775.4	-0.1498	0.725	-0.1462	0.47	-0.1287	0.487	0.0211	NA	0	0	0	0	0	0	0	0	0
Tb927.7.970	NMD3 (rRNA processing)	rRNA.tRNA.process	1170.6	-0.1497	0.7	-0.2122	0.187	-0.2574	0.0543	-0.1077	0.698	0	0	0	0	0	0	0	0	0
Tb927.9.10960	ATP-dependent DEAD/H RNA helicase, putative, no clear yeast homologue	RNA.helicase	1091.5	-0.1497	0.629	-0.1197	0.54	-0.0849	0.644	0.0648	0.836	0	0	0	0	0	0	0	0	0
Tb927.11.15540	hypothetical protein, conserved	ZUnknown	153.8	-0.1497	NA	-0.0297	0.95	0.0958	0.739	0.2455	NA	0	0	0	0	0	0	0	0	0
Tb927.8.4900	hypothetical protein, conserved	ZUnknown	1494	-0.1496	0.619	-0.1609	0.318	-0.1614	0.26	-0.0118	0.993	0	0	0	0	0	0	0	0	0
Tb927.8.2600	WD domain, G-beta repeat/BING4CT (NUC141) domain containing protein, putative	ZUnknown	1219.9	-0.1492	0.648	-0.1713	0.282	-0.1793	0.21	-0.0302	0.944	0	0	0	0	0	0	0	0	0
Tb927.3.2170	EF2 translation elongation factor EF-2, putative	Translation	2043.3	-0.1492	0.527	-0.0887	0.687	-0.0305	0.887	0.1187	0.513	0	0	0	0	0	0	0	0	0
Tb927.11.12140	hypothetical protein	ZUnknown	134.4	-0.1488	NA	-0.1922	0.501	-0.1535	0.536	-0.0047	NA	0	0	0	0	0	0	0	0	0
Tb927.7.6090	eIF3a	Translation	5621.1	-0.1488	0.351	-0.172	0.109	-0.1912	0.0455	-0.0424	0.885	0	0	0	0	0	0	0	0	0
Tb927.9.9730	FP45	Vesicular.transport	618.1	-0.1479	NA	-0.2405	0.167	-0.3019	0.0329	-0.154	NA	0	0	0	0	0	0	0	0	0
Tb927.8.4670	hypothetical protein, conserved	ZUnknown	1009.6	-0.1478	0.7	-0.0682	0.82	0.0116	0.966	0.1593	0.407	0	0	0	0	0	0	0	0	0
Tb927.7.1700	hypothetical protein, conserved	ZUnknown	482	-0.1476	NA	-0.2317	0.235	-0.2773	0.0867	-0.1297	NA	0	0	0	0	0	0	0	0	0
Tb927.9.5350	actin related protein 3, putative	Cytoskeleton	680.1	-0.1475	0.809	-0.1828	0.389	-0.1936	0.278	-0.0461	NA	0	0	0	0	0	0	0	0	0
Tb927.9.2900	UTP10 (NOP287)	rRNA.tRNA.process	7192.7	-0.1475	0.335	-0.1418	0.222	-0.1337	0.215	0.0138	0.976	0	0	0	0	0	0	0	0	0
Tb927.7.3620	tyrosyl-tRNA synthetase, putative	Translation.tRNA	2921	-0.1475	0.45	-0.1275	0.384	-0.105	0.435	0.0425	0.899	0	0	0	0	0	0	0	0	0
Tb927.9.1650	hypothetical protein, conserved	ZUnknown	323.4	-0.1475	NA	-0.1005	0.771	-0.04	0.9	0.1075	NA	0	0	0	0	0	0	0	0	0
Tb927.9.9220	hypothetical protein, conserved	ZUnknown	1076.5	-0.1474	0.682	-0.1549	0.367	-0.1497	0.338	-0.0023	0.998	0	0	0	0	0	0	0	0	0
Tb927.7.3120	small nuclear ribonucleoprotein SmD1	RNA.processing	566.1	-0.1474	NA	-0.1212	0.643	-0.0838	0.725	0.0636	NA	0	0	0	0	0	0	0	0	0
Tb927.10.2530	adenylate kinase, putative (ADKF)	Nucleotides	1256.7	-0.1473	0.625	-0.1116	0.576	-0.073	0.696	0.0743	0.805	0	0	0	0	0	0	0	0	0
Tb927.4.3150	hypothetical protein, conserved, ATPase domain of HSP90, DNA TopoII	ZUnknown	618.1	-0.1471	NA	-0.2119	0.253	-0.2448	0.122	-0.0977	NA	0	0	0	0	0	0	0	0	0
Tb927.6.4370	eIF3d	Translation	2603.9	-0.147	0.494	-0.1779	0.149	-0.2007	0.0638	-0.0537	0.856	0	0	0	0	0	0	0	0	0
Tb927.11.9120	SNF2 family N-terminal domain/Ring finger domain containing protein, putative	ZUnknown	1056.5	-0.1469	0.695	-0.1516	0.397	-0.1442	0.373	0.0028	0.998	0	0	0	0	0	0	0	0	0
Tb927.10.4230	hypothetical protein, conserved	ZUnknown	522.9	-0.1466	NA	-0.1173	0.66	-0.0768	0.758	0.0697	NA	0	0	0	0	0	0	0	0	0
Tb927.10.2060	hypothetical protein, conserved	ZUnknown	1482.6	-0.1465	0.688	-0.1358	0.48	-0.1173	0.501	0.0291	0.948	0	0	0	0	0	0	0	0	0
Tb927.10.5300	eIF-6	Translation	686.8	-0.1465	0.754	-0.0952	0.724	-0.0408	0.874	0.1056	NA	0	0	0	0	0	0	0	0	0
Tb927.7.2710	NADH-cytochrome b5 reductase, putative	Mito.e.transport	517.6	-0.1463	NA	-0.2535	0.158	-0.3245	0.0253	-0.1782	NA	0	0	0	0	0	0	0	0	0
Tb927.4.330	hypothetical protein, conserved	Mito.pathway	500.5	-0.1462	NA	-0.1721	0.413	-0.1707	0.358	-0.0245	NA	0	0	0	0	0	0	0	0	0
Tb927.10.7210	hypothetical protein, conserved	ZUnknown	267.7	-0.1461	NA	-0.1249	0.687	-0.0773	0.786	0.0688	NA	0	0	0	0	0	0	0	0	0
Tb927.11.2370	MEX67	Nuclear.transport	1753.5	-0.1459	0.57	-0.1478	0.323	-0.142	0.297	0.0039	0.998	0	0	0	0	0	0	0	0	0
Tb927.10.12610	hypothetical protein	ZUnknown	237.6	-0.1458	NA	-0.2323	0.323	-0.2483	0.204	-0.1026	NA	0	0	0	0	0	0	0	0	0
Tb927.3.3220	CTR9, part of PAF complex	RNA.synthesis	2138.1	-0.1455	0.537	-0.1554	0.249	-0.1577	0.207	-0.0122	0.989	0	0	0	0	0	0	0	0	0
Tb927.11.13310	hypothetical protein, conserved, spectrin repeats	ZUnknown	379.8	-0.1453	NA	-0.0337	0.938	0.0828	0.765	0.2281	NA	0	0	0	0	0	0	0	0	0
Tb927.10.4570	EF2 elongation factor 2	Translation	44755.7	-0.1453	0.501	-0.0236	0.943	0.1071	0.449	0.2524	0.0178	0	0	0	0	0	0	0	0	0
Tb927.9.11040	mitochondrial carrier protein, MCP3	Mito.transport	314.3	-0.1452	NA	-0.1114	0.735	-0.0572	0.851	0.0879	NA	0	0	0	0	0	0	0	0	0
Tb927.9.6620	hypothetical protein, conserved	Mito.pathway	197.5	-0.1452	NA	-0.1069	0.767	-0.0465	0.89	0.0987	NA	0	0	0	0	0	0	0	0	0
Tb927.11.5980	conserved protein	ZUnknown	454.9	-0.1449	NA	-0.1954	0.343	-0.2083	0.248	-0.0634	NA	0	0	0	0	0	0	0	0	0
Tb927.3.2460	hypothetical protein, conserved	ZUnknown	266.1	-0.1447	NA	-0.2491	0.24	-0.2894	0.103	-0.1447	NA	0	0	0	0	0	0	0	0	0
Tb927.10.6220	XRND	RNA.degradation	1365	-0.1447	0.623	-0.137	0.415	-0.1217	0.429	0.023	0.959	0	0	0	0	0	0	0	0	0
Tb927.6.4140	paraflagellar rod protein PFC4	Cytoskeleton	3368.9	-0.1442	0.545	-0.1702	0.207	-0.1903	0.101	-0.0461	0.898	0	0	0	0	0	0	0	0	0
Tb927.10.8560	small GTPase, putative (RAB23)	Vesicular.transport	381.6	-0.1442	NA	-0.1518	0.546	-0.1319	0.556	0.0123	NA	0	0	0	0	0	0	0	0	0
Tb927.7.7110	leucine-rich repeat protein (LRRP)	LRRP	2105	-0.144	0.551	-0.165	0.212	-0.1771	0.136	-0.0331	0.925	0	0	0	0	0	0	0	0	0
Tb927.10.2550	malate dehydrogenase-related	Mito.e.transport	295.4	-0.144	NA	-0.0852	0.813	-0.0165	0.963	0.1275	NA	0	0	0	0	0	0	0	0	0
Tb927.1.3350	hypothetical protein	ZUnknown	65.2	-0.144	NA	-0.0324	0.942	0.0908	0.741	0.2348	NA	0	0	0	0	0	0	0	0	0
Tb927.11.12050	hypothetical protein, conserved	ZUnknown	1182.7	-0.1439	0.772	-0.2005	0.264	-0.2401	0.104	-0.0962	0.77	0	0	0	0	0	0	0	0	0
Tb927.1.1240	CTP synthase	Nucleotides	2056.7	-0.1436	0.57	-0.1916	0.146	-0.2292	0.0365	-0.0856	0.722	0	0	0	0	0	0	0	0	0
Tb927.1.3810	hypothetical protein, conserved	ZUnknown	321.9	-0.1436	NA	-0.0313	0.942	0.0808	0.767	0.2244	NA	0	0	0	0	0	0	0	0	0
Tb927.11.13480	hypothetical protein, conserved	ZUnknown	325.8	-0.1433	NA	-0.1352	0.634	-0.1005	0.687	0.0428	NA	0	0	0	0	0	0	0	0	0
Tb927.10.1800	methyltransferase domain containing protein, putative	ZUnknown	493.3	-0.1427	NA	-0.2011	0.363	-0.2206	0.235	-0.0778	NA	0	0	0	0	0	0	0	0	0
Tb927.8.1540	hypothetical protein, conserved	Cytoskeleton	2181.2	-0.1427	0.564	-0.1432	0.33	-0.1372	0.305	0.0055	0.997	0	0	0	0	0	0	0	0	0
Tb927.10.6320	NOC3, nuclear export of ribosomes, assoc with NRG1	rRNA.tRNA.process	1220.1	-0.1426	0.683	-0.1586	0.327	-0.1617	0.264	-0.0191	0.97	0	0	0	0	0	0	0	0	0
Tb927.10.540	ATP-dependent DEAD/H RNA helicase, Named as orthologue of TcSUB2, RNAi causes poly(A) accumulation in nucleus.	RNA.helicase	4679.8	-0.1426	0.427	-0.1532	0.195	-0.1598	0.134	-0.0172	0.968	0	0	0	0	0	0	0	0	0
Tb927.5.1080	RBP22	RNA.binding	343.5	-0.1426	NA	-0.1032	0.746	-0.0511	0.861	0.0915	NA	0	0	0	0	0	0	0	0	0
Tb927.11.6550	PUF nine target 1 (PNT1)	Cell.cycle	4245.5	-0.1424	0.427	-0.0746	0.732	-0.0073	0.971	0.1352	0.331	0	0	0	0	0	0	0	0	0
Tb927.9.6720	Putative methyltransferase, putative	ZUnknown	635.5	-0.1424	NA	-0.0738	0.818	-0.0035	0.992	0.1388	NA	0	0	0	0	0	0	0	0	0
Tb927.11.380	B9 domain-containing protein 2 (b9d2)	ZUnknown	280.4	-0.1423	NA	-0.1026	0.759	-0.0484	0.876	0.094	NA	0	0	0	0	0	0	0	0	0
Tb927.11.6440	hypothetical protein, conserved, Bromodomain and poly(Q), often in TAP MS, low similarity to coiled-coil proteins and hook proteins (cytoskeletal linkers)	ZUnknown	4107.8	-0.1421	0.419	-0.2625	0.0509	-0.4043	1.26e-07	-0.2623	0.00253	0	0	0	0	0	1	0	0	1
Tb927.9.11840	Pre-rRNA-processing protein PNO1	rRNA.tRNA.process	535.5	-0.1421	NA	-0.173	0.424	-0.1766	0.343	-0.0345	NA	0	0	0	0	0	0	0	0	0
Tb927.9.5730	nucleosome assembly protein-like protein	Chromatin	2208.2	-0.142	0.58	-0.224	0.0947	-0.3024	0.00234	-0.1604	0.282	0	0	0	0	0	0	0	0	0
Tb927.7.5250	hypothetical protein, conserved	ZUnknown	1166.4	-0.142	0.7	-0.136	0.463	-0.121	0.477	0.021	0.97	0	0	0	0	0	0	0	0	0
Tb927.11.7560	CMF15, T. brucei components of motile flagella (TbCMF15)	Cytoskeleton	3182.3	-0.142	0.524	-0.0849	0.687	-0.0281	0.89	0.1139	0.513	0	0	0	0	0	0	0	0	0
Tb927.5.1580	ZC3H13	RNA.binding	1232.8	-0.1418	0.704	-0.1655	0.326	-0.1753	0.233	-0.0335	0.937	0	0	0	0	0	0	0	0	0
Tb927.4.370	hypothetical protein, conserved	ZUnknown	373.2	-0.1418	NA	-0.1483	0.571	-0.1246	0.597	0.0172	NA	0	0	0	0	0	0	0	0	0
Tb927.3.680	cytochrome P450, putative	Mito.e.transport	539.8	-0.1417	NA	-0.1142	0.661	-0.0759	0.756	0.0658	NA	0	0	0	0	0	0	0	0	0
Tb927.6.4150	hypothetical protein, conserved, tryp specific	ZUnknown	254.7	-0.1417	NA	-0.1127	0.733	-0.0618	0.842	0.08	NA	0	0	0	0	0	0	0	0	0
Tb927.10.12980	methyltransferase, NOL1/NOP2/sun family	Lysosome	1796.7	-0.1414	0.691	-0.1182	0.56	-0.0915	0.614	0.0499	0.899	0	0	0	0	0	0	0	0	0
Tb927.4.910	hypothetical protein, conserved	ZUnknown	353.5	-0.1412	NA	-0.1355	0.624	-0.1073	0.657	0.0339	NA	0	0	0	0	0	0	0	0	0
Tb927.8.870	serine/threonine kinase, putative,protein kinase, putative	Protein.kinase	987.2	-0.1411	0.79	-0.2811	0.1	-0.4231	0.000414	-0.282	0.0483	0	0	0	0	0	1	0	0	1
Tb927.10.8220	hypothetical protein, conserved	ZUnknown	243.4	-0.141	NA	-0.181	0.507	-0.1642	0.487	-0.0232	NA	0	0	0	0	0	0	0	0	0
Tb927.7.1560	TPR repeat, putative	ZUnknown	845.8	-0.1409	0.749	-0.1465	0.441	-0.1377	0.421	0.0032	NA	0	0	0	0	0	0	0	0	0
Tb927.10.9020	Gcd10p family, putative	ZUnknown	710.2	-0.1408	0.789	-0.1785	0.33	-0.193	0.225	-0.0523	NA	0	0	0	0	0	0	0	0	0
Tb927.10.4940	PK50 protein kinase	Protein.kinase	1897.7	-0.1407	0.7	-0.1569	0.364	-0.1643	0.264	-0.0236	0.962	0	0	0	0	0	0	0	0	0
Tb927.4.530	hypothetical protein, conserved	ZUnknown	879.5	-0.1406	0.754	-0.123	0.562	-0.0965	0.619	0.0441	NA	0	0	0	0	0	0	0	0	0
Tb927.9.13540	hypothetical protein, conserved	Mito.pathway	840	-0.1405	0.798	-0.135	0.538	-0.1174	0.553	0.0232	NA	0	0	0	0	0	0	0	0	0
Tb927.6.5000	Protein of unknown function (DUF773), putative	ZUnknown	693.2	-0.1405	0.795	-0.1173	0.623	-0.0846	0.694	0.0559	NA	0	0	0	0	0	0	0	0	0
Tb927.6.3920	hypothetical protein, conserved	ZUnknown	339.6	-0.1404	NA	-0.1649	0.507	-0.1551	0.483	-0.0147	NA	0	0	0	0	0	0	0	0	0
Tb927.6.4600	pre-mRNA splicing factor ATP-dependent RNA helicase, putative	RNA.processing	1624.4	-0.1403	0.7	-0.2193	0.147	-0.2893	0.0123	-0.149	0.421	0	0	0	0	0	0	0	0	0
Tb927.11.7780	ATOM46	Mito.biogenesis	1032.8	-0.1403	0.721	-0.1895	0.222	-0.2198	0.1	-0.0796	0.798	0	0	0	0	0	0	0	0	0
Tb927.5.2370	hydrolase, alpha/beta fold family, putative	Enzyme	495.5	-0.1403	NA	-0.1851	0.37	-0.1975	0.266	-0.0571	NA	0	0	0	0	0	0	0	0	0
Tb927.11.15830	RNA methyltransferase, putative	rRNA.tRNA.process	2624.4	-0.1401	0.57	-0.1313	0.405	-0.1183	0.402	0.0218	0.959	0	0	0	0	0	0	0	0	0
Tb927.7.6840	Centrosomal spindle body, CEP44	Cytoskeleton	287.7	-0.1397	NA	-0.0375	0.932	0.0665	0.824	0.2062	NA	0	0	0	0	0	0	0	0	0
Tb927.5.4560	guanine deaminase, putative	Nucleotides	2223.7	-0.1395	0.612	-0.1976	0.147	-0.2463	0.0229	-0.1068	0.612	0	0	0	0	0	0	0	0	0
Tb927.11.13950	Mut7-C RNAse domain containing protein, putative	ZUnknown	354	-0.1394	NA	-0.0645	0.859	0.0133	0.968	0.1527	NA	0	0	0	0	0	0	0	0	0
Tb927.9.8670	hypothetical protein, conserved	ZUnknown	1373.3	-0.1393	0.669	-0.2029	0.147	-0.2522	0.0273	-0.1129	0.595	0	0	0	0	0	0	0	0	0
Tb927.10.5010	EF-G1 Mitochondrial elongation factor G	Mito.translation	2234.2	-0.1392	0.616	-0.2038	0.132	-0.2611	0.0136	-0.1219	0.509	0	0	0	0	0	0	0	0	0
Tb927.8.7030	hypothetical protein, conserved	ZUnknown	576.1	-0.1391	NA	-0.0994	0.724	-0.0529	0.844	0.0862	NA	0	0	0	0	0	0	0	0	0
Tb927.6.3420	Oligomerisation domain containing protein, putative	ZUnknown	437.3	-0.139	NA	-0.1672	0.46	-0.1665	0.398	-0.0275	NA	0	0	0	0	0	0	0	0	0
Tb927.9.1910	hypothetical protein, conserved	ZUnknown	411.7	-0.1389	NA	-0.2203	0.278	-0.2585	0.125	-0.1196	NA	0	0	0	0	0	0	0	0	0
Tb927.6.4350	ribosomal RNA assembly protein, putative	rRNA.tRNA.process	697.3	-0.1388	0.839	-0.2321	0.201	-0.2983	0.0383	-0.1595	NA	0	0	0	0	0	0	0	0	0
Tb927.7.7150	hypothetical protein, conserved	ZUnknown	537.9	-0.1388	NA	-0.1284	0.596	-0.1021	0.64	0.0367	NA	0	0	0	0	0	0	0	0	0
Tb927.11.2720	hypothetical protein, conserved	ZUnknown	708.7	-0.1387	0.798	-0.1312	0.544	-0.1101	0.579	0.0286	NA	0	0	0	0	0	0	0	0	0
Tb927.10.2050	hypothetical protein, conserved	ZUnknown	498	-0.1384	NA	-0.1339	0.58	-0.1121	0.61	0.0263	NA	0	0	0	0	0	0	0	0	0
Tb927.7.1940	hypothetical protein, T brucei-specific	ZUnknown	36	-0.1382	NA	-0.115	0.729	-0.033	0.909	0.1053	NA	0	0	0	0	0	0	0	0	0
Tb927.8.1420	acyl-CoA dehydrogenase, mitochondrial. ACAD	Lipids	852.4	-0.1381	0.839	-0.1698	0.423	-0.1809	0.308	-0.0428	NA	0	0	0	0	0	0	0	0	0
Tb927.5.2310	Phosphorylated CTD interacting factor 1 WW domain containing protein, putative	ZUnknown	1519.2	-0.1379	0.709	-0.1785	0.252	-0.2065	0.119	-0.0686	0.834	0	0	0	0	0	0	0	0	0
Tb927.3.870	SLBP2, like histone RNA hairpin binding proteins, binds to EIF4E2	RNA.binding	805.6	-0.1379	0.839	-0.1634	0.441	-0.1685	0.35	-0.0306	NA	0	0	0	0	0	0	0	0	0
Tb927.11.6000	Mitchondrial LSU ribosomal protein L4	Mito.translation	609	-0.1373	NA	-0.1887	0.326	-0.2116	0.191	-0.0742	NA	0	0	0	0	0	0	0	0	0
Tb927.9.10000	hypothetical protein, conserved	ZUnknown	397	-0.1372	NA	-0.1282	0.63	-0.0999	0.673	0.0373	NA	0	0	0	0	0	0	0	0	0
Tb927.3.3230	NOL1/NOP2/sun family, putative	ZUnknown	787.8	-0.1368	0.79	-0.1422	0.475	-0.1325	0.459	0.0043	NA	0	0	0	0	0	0	0	0	0
Tb927.1.3290	hypothetical protein, conserved	ZUnknown	2000.9	-0.1367	0.674	-0.1926	0.183	-0.2378	0.0399	-0.1011	0.667	0	0	0	0	0	0	0	0	0
Tb927.10.13020	vacuolar protein sorting complex subunit, putative,Vps16, putative	Lysosome	1755.8	-0.1367	0.79	-0.1825	0.329	-0.2176	0.14	-0.0809	0.815	0	0	0	0	0	0	0	0	0
Tb927.10.8310	Histone acetyltransferase HAT3	Chromatin	436.1	-0.1365	NA	-0.2587	0.206	-0.3412	0.0312	-0.2047	NA	0	0	0	0	0	0	0	0	0
Tb927.6.3480	importin beta subunit beta-4	RNA.binding	1570.1	-0.1365	0.734	-0.221	0.158	-0.2964	0.0118	-0.1599	0.381	0	0	0	0	0	0	0	0	0
Tb927.11.590	hypothetical protein, conserved	ZUnknown	545.7	-0.1365	NA	-0.1288	0.584	-0.1056	0.62	0.0309	NA	0	0	0	0	0	0	0	0	0
Tb927.10.2540	adenylate kinase, putative (ADKC)	Nucleotides	422.8	-0.1364	NA	-0.1622	0.492	-0.1578	0.442	-0.0214	NA	0	0	0	0	0	0	0	0	0
Tb927.3.5430	hypothetical protein, conserved	ZUnknown	659.5	-0.1363	0.843	-0.1508	0.488	-0.1444	0.446	-0.0081	NA	0	0	0	0	0	0	0	0	0
Tb927.10.8410	hypothetical protein, conserved	ZUnknown	401.5	-0.1363	NA	-0.1463	0.553	-0.1292	0.558	0.0071	NA	0	0	0	0	0	0	0	0	0
Tb927.11.13750	Ras-related protein Rab4	Vesicular.transport	329.5	-0.1363	NA	-0.1143	0.712	-0.0729	0.792	0.0634	NA	0	0	0	0	0	0	0	0	0
Tb927.5.4540	GRESAG 4, putative receptor-type adenylate cyclase	GRESAG	3359.4	-0.1363	0.525	-0.0743	0.733	-0.0142	0.946	0.1221	0.425	0	0	0	0	0	0	0	0	0
Tb927.5.590	protein phosphatase 1, regulatory subunit, putative	Protein.phosphatase	703.6	-0.1362	0.843	-0.1808	0.362	-0.1992	0.238	-0.063	NA	0	0	0	0	0	0	0	0	0
Tb927.11.1960	leucine-rich repeat protein (LRRP)	LRRP	749.2	-0.1361	0.825	-0.1646	0.408	-0.1713	0.319	-0.0352	NA	0	0	0	0	0	0	0	0	0
Tb927.3.5120	Ankyrin repeats (3 copies), putative	ZUnknown	856.4	-0.1361	0.793	-0.157	0.408	-0.1604	0.332	-0.0243	NA	0	0	0	0	0	0	0	0	0
Tb927.9.1880	WD domain, G-beta repeat, putative	ZUnknown	1871	-0.136	0.622	-0.0743	0.756	-0.0139	0.954	0.1221	0.491	0	0	0	0	0	0	0	0	0
Tb927.6.4030	superoxide dismutase, putative	Redox	491.3	-0.1359	NA	-0.1327	0.585	-0.1109	0.613	0.025	NA	0	0	0	0	0	0	0	0	0
Tb927.10.14500	hypothetical protein, conserved	ZUnknown	2233.6	-0.1356	0.747	-0.1345	0.496	-0.126	0.462	0.0096	0.997	0	0	0	0	0	0	0	0	0
Tb927.5.3950	2OG-Fe(II) oxygenase superfamily, putative	ZUnknown	689.9	-0.1355	0.828	-0.1735	0.363	-0.1875	0.255	-0.052	NA	0	0	0	0	0	0	0	0	0
Tb927.2.4670	hypothetical protein, conserved	ZUnknown	369.7	-0.1352	NA	-0.2117	0.325	-0.2431	0.166	-0.1079	NA	0	0	0	0	0	0	0	0	0
Tb927.4.4710	hypothetical protein, conserved	ZUnknown	1609.1	-0.1351	0.687	-0.1773	0.218	-0.2073	0.0885	-0.0722	0.804	0	0	0	0	0	0	0	0	0
Tb927.3.4600	hypothetical protein, conserved	ZUnknown	2668.6	-0.1351	0.562	-0.1653	0.184	-0.188	0.0812	-0.0529	0.853	0	0	0	0	0	0	0	0	0
Tb927.9.14300	hypothetical protein, conserved	ZUnknown	960.9	-0.1351	0.79	-0.0894	0.733	-0.0408	0.867	0.0943	0.757	0	0	0	0	0	0	0	0	0
Tb927.6.3450	hypothetical protein, conserved	ZUnknown	970.4	-0.135	0.774	-0.1588	0.373	-0.166	0.29	-0.031	0.945	0	0	0	0	0	0	0	0	0
Tb927.8.8150	C2 domain containing protein, putative	ZUnknown	901	-0.1348	0.776	-0.2101	0.19	-0.2638	0.0409	-0.129	NA	0	0	0	0	0	0	0	0	0
Tb927.9.15060	rRNA processing protein EBP2, putative	rRNA.tRNA.process	648.4	-0.1347	0.87	-0.0883	0.776	-0.0357	0.901	0.099	NA	0	0	0	0	0	0	0	0	0
Tb927.10.8290	eIF3c	Translation	4601.2	-0.1345	0.488	-0.1636	0.152	-0.1883	0.0545	-0.0538	0.836	0	0	0	0	0	0	0	0	0
Tb927.6.3140	Ubiquitin-like protein	Ubiquitin.proteasome	143.5	-0.1344	NA	-0.1328	0.704	-0.0844	0.777	0.05	NA	0	0	0	0	0	0	0	0	0
Tb927.9.12440	hypothetical protein, conserved	ZUnknown	175.9	-0.1344	NA	-0.1141	0.747	-0.0645	0.842	0.0698	NA	0	0	0	0	0	0	0	0	0
Tb927.7.5490	arginine N-methyltransferase, type III (PRMT7)	Arg.methylation	915.5	-0.1343	0.798	-0.1371	0.495	-0.1268	0.485	0.0075	0.997	0	0	0	0	0	0	0	0	0
Tb927.5.3840	hypothetical protein, conserved	ZUnknown	750	-0.1343	0.825	-0.122	0.591	-0.0984	0.629	0.0358	NA	0	0	0	0	0	0	0	0	0
Tb927.3.690	protein kinase, putative	Protein.kinase	1013.7	-0.134	0.818	-0.2319	0.174	-0.3159	0.0139	-0.1819	0.348	0	0	0	0	0	0	0	0	0
Tb927.11.8970	ribose 5-phosphate isomerase, putative	PPP	1991.9	-0.134	0.717	-0.0572	0.842	0.0214	0.929	0.1553	0.381	0	0	0	0	0	0	0	0	0
Tb927.9.7830	mitochondrial tRNA import complex, putative	Mito.biogenesis	474.9	-0.1338	NA	-0.2083	0.314	-0.2438	0.148	-0.11	NA	0	0	0	0	0	0	0	0	0
Tb927.10.5550	hypothetical protein, conserved	ZUnknown	342.3	-0.1338	NA	-0.0917	0.8	-0.0376	0.907	0.0962	NA	0	0	0	0	0	0	0	0	0
Tb927.3.5080	PSP1 C-terminal conserved region, putative	ZUnknown	1123.2	-0.1338	0.754	-0.0238	0.946	0.0889	0.636	0.2227	0.112	0	0	0	0	0	0	0	0	0
Tb927.9.8380	hypothetical protein, conserved	ZUnknown	564.4	-0.1336	NA	-0.2098	0.276	-0.2538	0.106	-0.1201	NA	0	0	0	0	0	0	0	0	0
Tb927.11.4890	MT48 or MTr2 or Com1 cap methyltransferase	RNA.processing	582.3	-0.1336	NA	-0.1679	0.409	-0.1756	0.318	-0.0421	NA	0	0	0	0	0	0	0	0	0
Tb927.10.2350	pyruvate dehydrogenase complex E3 binding protein, putative	Mito.citric.acid.cycle	456.8	-0.1334	NA	-0.2513	0.201	-0.3321	0.0282	-0.1987	NA	0	0	0	0	0	0	0	0	0
Tb927.6.2170	co-chaperone GrpE, putative	Chaperone	557.1	-0.1334	NA	-0.1627	0.438	-0.1668	0.356	-0.0335	NA	0	0	0	0	0	0	0	0	0
Tb927.11.5080	hypothetical protein, conserved	ZUnknown	208.7	-0.133	NA	-0.2201	0.372	-0.2364	0.245	-0.1034	NA	0	0	0	0	0	0	0	0	0
Tb927.1.610	hypothetical protein, conserved	ZUnknown	481.6	-0.133	NA	-0.1599	0.489	-0.158	0.427	-0.025	NA	0	0	0	0	0	0	0	0	0
Tb927.11.5810	Surfeit locus protein 6, putative	ZUnknown	484.4	-0.1326	NA	-0.1113	0.687	-0.0773	0.761	0.0553	NA	0	0	0	0	0	0	0	0	0
Tb927.8.560	GEM1, putative	ZUnknown	845.3	-0.1325	0.809	-0.211	0.201	-0.267	0.0435	-0.1345	NA	0	0	0	0	0	0	0	0	0
Tb927.1.2600	PUF9	RNA.binding	2643.6	-0.1325	0.657	-0.1605	0.268	-0.1804	0.14	-0.0479	0.892	0	0	0	0	0	0	0	0	0
Tb927.11.15090	hypothetical protein, conserved	ZUnknown	411.5	-0.1325	NA	-0.1243	0.646	-0.0966	0.683	0.036	NA	0	0	0	0	0	0	0	0	0
Tb927.7.320	RBP8	RNA.binding	201.2	-0.1323	NA	-0.2212	0.373	-0.2423	0.227	-0.11	NA	0	0	0	0	0	0	0	0	0
Tb927.11.5240	Methyltransferase TRM13, putative	ZUnknown	552.3	-0.1322	NA	-0.1592	0.454	-0.1614	0.383	-0.0292	NA	0	0	0	0	0	0	0	0	0
Tb927.3.3960	DRBD6A	RNA.binding	637.2	-0.132	NA	-0.1831	0.368	-0.2077	0.216	-0.0758	NA	0	0	0	0	0	0	0	0	0
Tb927.10.9120	hypothetical protein, conserved	Mito.pathway	372.1	-0.1316	NA	-0.167	0.492	-0.1679	0.419	-0.0363	NA	0	0	0	0	0	0	0	0	0
Tb927.5.1450	GRESAG 4, putative receptor-type adenylate cyclase	GRESAG	1207.2	-0.1316	0.799	-0.159	0.399	-0.1724	0.269	-0.0408	0.925	0	0	0	0	0	0	0	0	0
Tb927.9.8410	chaperone protein DNAj, putative	Chaperone	1012.3	-0.1313	0.795	-0.1519	0.411	-0.1575	0.323	-0.0263	0.955	0	0	0	0	0	0	0	0	0
Tb927.5.1480	hypothetical protein	ZUnknown	216.3	-0.1312	NA	-0.2281	0.253	-0.2894	0.0528	-0.1582	NA	0	0	0	0	0	0	0	0	0
Tb927.11.3890	N(2), N(2)-dimethylguanosine tRNA methyltransferase, putative	rRNA.tRNA.process	1253.1	-0.1311	0.734	-0.1635	0.294	-0.1818	0.179	-0.0506	0.891	0	0	0	0	0	0	0	0	0
Tb927.3.3890	hypothetical protein, conserved	Mito.pathway	432.4	-0.1309	NA	-0.1065	0.714	-0.0699	0.787	0.0609	NA	0	0	0	0	0	0	0	0	0
Tb927.7.5590	Domain of unknown function (DUF3883), putative	ZUnknown	2510	-0.1307	0.687	-0.1493	0.331	-0.1608	0.216	-0.0302	0.938	0	0	0	0	0	0	0	0	0
Tb927.4.3500	Amastin surface glycoprotein, putative	Membrane.protein	135.2	-0.1307	NA	-0.1254	0.725	-0.0795	0.794	0.0512	NA	0	0	0	0	0	0	0	0	0
Tb927.7.4340	Protein of unknown function (DUF1253), putative	ZUnknown	2098.3	-0.1307	0.657	-0.1202	0.467	-0.1052	0.483	0.0256	0.948	0	0	0	0	0	0	0	0	0
Tb927.11.9790	calmodulin, putative	Calcium	614.4	-0.1306	NA	-0.1878	0.339	-0.2161	0.186	-0.0856	NA	0	0	0	0	0	0	0	0	0
Tb927.7.270	ribosome biogenesis protein, putative	rRNA.tRNA.process	1006.6	-0.1303	0.846	-0.2424	0.167	-0.3446	0.0068	-0.2143	0.222	0	0	0	0	0	0	0	0	0
Tb927.8.5770	Elongator-like Protein 3a ELP3a	Chromatin	730.3	-0.1302	0.87	-0.2472	0.17	-0.3465	0.00934	-0.2163	NA	0	0	0	0	0	0	0	0	0
Tb927.8.6500	cell division cycle protein, putative	Cell.cycle	1494.6	-0.1302	0.734	-0.2028	0.17	-0.2644	0.021	-0.1342	0.474	0	0	0	0	0	0	0	0	0
Tb927.10.3770	hypothetical protein, conserved,predicted TPR repeat protein	Mito.pathway	1047.8	-0.1302	0.798	-0.2018	0.218	-0.2562	0.0479	-0.1261	0.584	0	0	0	0	0	0	0	0	0
Tb927.10.10070	hypothetical protein, conserved	ZUnknown	691.5	-0.1302	0.869	-0.1515	0.472	-0.1526	0.403	-0.0225	NA	0	0	0	0	0	0	0	0	0
Tb927.2.5750	tyrosyl-DNA Phosphodiesterase (Tdp1), putative	DNA	1087.9	-0.1301	0.789	-0.1407	0.451	-0.1388	0.398	-0.0087	0.997	0	0	0	0	0	0	0	0	0
Tb927.7.3420	FKBP12 (TOR complex)	Signalling	478.7	-0.13	NA	-0.1008	0.745	-0.0588	0.838	0.0713	NA	0	0	0	0	0	0	0	0	0
Tb927.4.1270	ruvB-like DNA helicase, putative	DNA	1947.6	-0.1298	0.718	-0.0952	0.661	-0.0594	0.764	0.0704	0.813	0	0	0	0	0	0	0	0	0
Tb927.11.7940	calmodulin, putative	Calcium	469.8	-0.1297	NA	-0.0282	0.942	0.0716	0.78	0.2013	NA	0	0	0	0	0	0	0	0	0
Tb927.9.9950	hypothetical protein, conserved	ZUnknown	780.9	-0.1294	0.839	-0.1323	0.518	-0.122	0.515	0.0074	NA	0	0	0	0	0	0	0	0	0
Tb927.4.3100	hypothetical protein, conserved	ZUnknown	563.2	-0.1291	NA	-0.1038	0.708	-0.0683	0.783	0.0608	NA	0	0	0	0	0	0	0	0	0
Tb927.9.4310	tricarboxylate carrier, putative	Mito.membrane	343.7	-0.129	NA	-0.1266	0.661	-0.1002	0.685	0.0288	NA	0	0	0	0	0	0	0	0	0
Tb927.7.760	hypothetical protein, conserved	ZUnknown	1703.7	-0.1289	0.768	-0.0572	0.843	0.016	0.954	0.1448	0.453	0	0	0	0	0	0	0	0	0
Tb927.10.13740	calcium-dependent lipid binding protein, putative,synaptotagmin, putative (CaLB)	Cytoskeleton	1016.4	-0.1288	0.825	-0.2347	0.158	-0.325	0.00745	-0.1962	0.248	0	0	0	0	0	0	0	0	0
Tb927.8.5040	EMG1/NEP1 methyltransferase, putative	ZUnknown	444.8	-0.1288	NA	-0.1416	0.567	-0.1281	0.557	0.0007	NA	0	0	0	0	0	0	0	0	0
Tb927.3.1670	hypothetical protein, conserved	ZUnknown	1802	-0.1287	0.688	-0.109	0.53	-0.0859	0.597	0.0428	0.9	0	0	0	0	0	0	0	0	0
Tb927.10.1780	hypothetical protein	ZUnknown	172.6	-0.1286	NA	-0.1841	0.501	-0.178	0.435	-0.0494	NA	0	0	0	0	0	0	0	0	0
Tb927.8.6660	paraflagellar rod protein PFC1	Cytoskeleton	4657.1	-0.1284	0.57	-0.1269	0.366	-0.1218	0.323	0.0066	0.997	0	0	0	0	0	0	0	0	0
Tb927.3.790	ZC3H6	RNA.binding	421.3	-0.1283	NA	-0.1299	0.63	-0.112	0.629	0.0164	NA	0	0	0	0	0	0	0	0	0
Tb927.2.4590	branched-chain amino acid aminotransferase, putative	Amino.acids	4408.5	-0.1281	0.57	-0.0244	0.938	0.0842	0.552	0.2123	0.0397	0	0	0	0	0	0	0	0	0
Tb927.10.12350	hypothetical protein, conserved	ZUnknown	330.4	-0.1279	NA	-0.1654	0.51	-0.166	0.436	-0.0381	NA	0	0	0	0	0	0	0	0	0
Tb927.11.6890	DNA repair and recombination helicase protein PIF1	Mito.DNA	2446.3	-0.1278	0.713	-0.1299	0.451	-0.1259	0.396	0.0019	0.998	0	0	0	0	0	0	0	0	0
Tb927.9.7070	RRP40 exosome complex PH subunit	RNA.degradation	358.1	-0.1278	NA	-0.1004	0.75	-0.0595	0.84	0.0682	NA	0	0	0	0	0	0	0	0	0
Tb927.7.6280	Domain of unknown function (DUF3508), putative	ZUnknown	1026	-0.1277	0.799	-0.1445	0.431	-0.1481	0.35	-0.0204	0.97	0	0	0	0	0	0	0	0	0
Tb927.11.15260	hypothetical protein	ZUnknown	218.7	-0.1275	NA	-0.23	0.338	-0.2633	0.17	-0.1358	NA	0	0	0	0	0	0	0	0	0
Tb927.11.6860	3-UTR of 11.6870	3UTR	1556.7	-0.1275	0.916	-0.1975	0.326	-0.1466	0.554	-0.0191	0.99	0	0	0	0	0	0	0	0	0
Tb927.1.1200	Mitchondrial SSU ribosomal protein	Mito.translation	661.5	-0.1274	0.869	-0.1544	0.447	-0.1602	0.359	-0.0329	NA	0	0	0	0	0	0	0	0	0
Tb927.9.7950	hypothetical protein, conserved, predicted GPI anchor	Membrane.protein	179.2	-0.1273	NA	-0.1733	0.563	-0.1551	0.529	-0.0278	NA	0	0	0	0	0	0	0	0	0
Tb927.7.3500	glutathione-S-transferase/glutaredoxin, putative	Redox	776.1	-0.1272	0.878	-0.2344	0.212	-0.3222	0.0206	-0.195	NA	0	0	0	0	0	0	0	0	0
Tb927.1.2210	nucleosome assembly protein (NAP), putative	ZUnknown	1127.9	-0.1272	0.857	-0.1272	0.568	-0.1172	0.543	0.01	0.997	0	0	0	0	0	0	0	0	0
Tb927.3.3720	Golgi vesicular membrane trafficking protein, putative	Vesicular.transport	228	-0.1271	NA	-0.1699	0.527	-0.1634	0.478	-0.0363	NA	0	0	0	0	0	0	0	0	0
Tb927.8.7020	peptidase, putative	Protease	3322.3	-0.127	0.575	-0.1066	0.489	-0.0846	0.545	0.0424	0.892	0	0	0	0	0	0	0	0	0
Tb927.8.3000	hypothetical protein, conserved	ZUnknown	720.5	-0.1267	0.861	-0.156	0.424	-0.1647	0.325	-0.038	NA	0	0	0	0	0	0	0	0	0
Tb927.11.5890	Domain of unknown function (DUF4505), putative	ZUnknown	266.5	-0.1266	NA	-0.1764	0.49	-0.1796	0.403	-0.053	NA	0	0	0	0	0	0	0	0	0
Tb927.6.2950	hypothetical protein	ZUnknown	350.6	-0.1266	NA	-0.1362	0.616	-0.1185	0.613	0.0081	NA	0	0	0	0	0	0	0	0	0
Tb927.7.1400	TAC60 component of tripartite attachment complex	Cytoskeleton	806.8	-0.1265	0.842	-0.1564	0.407	-0.1676	0.298	-0.0411	NA	0	0	0	0	0	0	0	0	0
Tb927.8.6770	WD domain, G-beta repeat, putative	ZUnknown	964	-0.1265	0.839	-0.0814	0.764	-0.0338	0.895	0.0926	0.763	0	0	0	0	0	0	0	0	0
Tb927.9.10690	Protein of unknown function (DUF2009), putative	ZUnknown	1008.4	-0.1264	0.825	-0.1268	0.527	-0.1163	0.518	0.0101	0.996	0	0	0	0	0	0	0	0	0
Tb927.9.11520	hypothetical protein, conserved	ZUnknown	735.9	-0.1262	0.87	-0.0573	0.858	0.0102	0.972	0.1364	NA	0	0	0	0	0	0	0	0	0
Tb927.3.700	hypothetical protein, conserved, no clear yeast or human matches	ZUnknown	141.9	-0.1261	NA	-0.1952	0.49	-0.1864	0.417	-0.0602	NA	0	0	0	0	0	0	0	0	0
Tb927.8.5340	hypothetical protein	ZUnknown	31.2	-0.126	NA	-0.1121	0.729	-0.0347	0.901	0.0913	NA	0	0	0	0	0	0	0	0	0
Tb927.9.4130	hypothetical protein, conserved	ZUnknown	597.1	-0.1258	NA	-0.2202	0.384	-0.3144	0.0749	-0.1886	NA	0	0	0	0	0	0	0	0	0
Tb927.8.4970	paraflagellar rod protein PFR2	Cytoskeleton	27499.8	-0.1258	0.627	-0.0205	0.951	0.0917	0.536	0.2175	0.0561	0	0	0	0	0	0	0	0	0
Tb927.5.1940	hypothetical protein, conserved	ZUnknown	716.5	-0.1257	0.878	-0.0757	0.811	-0.0223	0.94	0.1034	NA	0	0	0	0	0	0	0	0	0
Tb927.10.3210	delta-1-pyrroline-5-carboxylate dehydrogenase, putative	Mito.pathway	2998.7	-0.1255	0.725	-0.2234	0.407	-0.5552	3.88e-10	-0.4297	3.09e-06	0	0	0	0	0	1	0	1	1
Tb927.3.2950	ribonuclease inhibitor- like protein LRRP-like	LRRP	1771.3	-0.1255	0.704	-0.1379	0.363	-0.142	0.289	-0.0165	0.972	0	0	0	0	0	0	0	0	0
Tb927.8.4590	hypothetical protein, conserved	ZUnknown	590.3	-0.1253	NA	-0.1716	0.407	-0.1919	0.26	-0.0666	NA	0	0	0	0	0	0	0	0	0
Tb927.7.200	hypothetical protein, conserved	ZUnknown	643	-0.1251	NA	-0.1331	0.6	-0.1221	0.573	0.003	NA	0	0	0	0	0	0	0	0	0
Tb927.7.1510	pseudouridylate synthase I, putative	rRNA.tRNA.process	1074.5	-0.125	0.799	-0.1387	0.441	-0.1402	0.374	-0.0151	0.982	0	0	0	0	0	0	0	0	0
Tb927.5.4270	ATP-dependent DEAD/H RNA helicase, putative Hca4, ribosome biogenesis?	rRNA.tRNA.process	1659.7	-0.1249	0.75	-0.1782	0.23	-0.2207	0.0647	-0.0958	0.693	0	0	0	0	0	0	0	0	0
Tb927.11.14090	DRBD18	RNA.binding	3402.8	-0.1248	0.628	-0.2053	0.12	-0.2853	0.00188	-0.1605	0.222	0	0	0	0	0	0	0	0	0
Tb927.3.3120	hypothetical protein, conserved	ZUnknown	681.8	-0.1248	0.878	-0.1303	0.564	-0.1191	0.55	0.0057	NA	0	0	0	0	0	0	0	0	0
Tb927.11.2160	hypothetical protein, conserved	ZUnknown	298.9	-0.1247	NA	-0.1941	0.438	-0.2124	0.295	-0.0877	NA	0	0	0	0	0	0	0	0	0
Tb927.8.2240	tryptophanyl-tRNA synthetase, putative	Translation.tRNA	670.2	-0.1247	0.872	-0.1722	0.368	-0.1946	0.228	-0.0699	NA	0	0	0	0	0	0	0	0	0
Tb927.8.6410	short-chain dehydrogenase, putative	Mito.pathway	476.6	-0.1247	NA	-0.1296	0.615	-0.1159	0.603	0.0088	NA	0	0	0	0	0	0	0	0	0
Tb927.9.13570	hypothetical protein, conserved	ZUnknown	623.6	-0.1244	NA	-0.1591	0.443	-0.1696	0.335	-0.0453	NA	0	0	0	0	0	0	0	0	0
Tb927.10.9760	alternative oxidase	Glucose.glycerol	486.8	-0.1244	NA	-0.1092	0.701	-0.0817	0.744	0.0428	NA	0	0	0	0	0	0	0	0	0
Tb927.2.4440	hypothetical protein	ZUnknown	405.9	-0.1238	NA	-0.2804	0.182	-0.4102	0.00745	-0.2864	NA	0	0	0	0	0	1	0	0	1
Tb927.9.10660	hypothetical protein, conserved	ZUnknown	176.7	-0.1238	NA	-0.1254	0.719	-0.0925	0.75	0.0313	NA	0	0	0	0	0	0	0	0	0
Tb927.10.9090	Cullin binding, putative	Ubiquitin.proteasome	309.8	-0.1237	NA	-0.19	0.438	-0.2063	0.303	-0.0826	NA	0	0	0	0	0	0	0	0	0
Tb927.11.10850	hypothetical protein, conserved	ZUnknown	809.4	-0.1235	0.882	-0.0965	0.728	-0.0627	0.801	0.0608	NA	0	0	0	0	0	0	0	0	0
Tb927.5.3940	DEAD/DEAH-box helicase, putative	Helicase	1287.7	-0.1234	0.793	-0.1797	0.244	-0.2213	0.0788	-0.098	0.697	0	0	0	0	0	0	0	0	0
Tb927.7.3670	TrkA-N domain containing protein, putative	ZUnknown	750	-0.1233	0.875	-0.1227	0.591	-0.1099	0.588	0.0134	NA	0	0	0	0	0	0	0	0	0
Tb927.9.10710	ERF3-related protein (but not ERF3)	Translation	816.9	-0.1232	0.87	-0.1455	0.472	-0.1505	0.388	-0.0273	NA	0	0	0	0	0	0	0	0	0
Tb927.11.5090	aspartate aminotransferase, mitochondrial	Amino.acids	378.9	-0.1231	NA	-0.1004	0.758	-0.0646	0.822	0.0586	NA	0	0	0	0	0	0	0	0	0
Tb927.11.6620	nucleic acid binding protein,possible AIR1 homologue	rRNA.tRNA.process	636.5	-0.1228	NA	-0.108	0.672	-0.0825	0.712	0.0402	NA	0	0	0	0	0	0	0	0	0
Tb927.11.1050	RNA processing factor 1, putative,ribosome biogenesis protein	rRNA.tRNA.process	945.1	-0.1226	0.843	-0.1589	0.376	-0.1782	0.239	-0.0556	0.885	0	0	0	0	0	0	0	0	0
Tb927.6.4740	importin-alpha re-exporter protein, putative	Nuclear.transport	2755.4	-0.1226	0.691	-0.0954	0.609	-0.0674	0.678	0.0552	0.85	0	0	0	0	0	0	0	0	0
Tb927.11.6240	hypothetical protein, conserved, 2 weak RBDs, no yeast or human match	RNA.binding	745.9	-0.1225	0.888	-0.0673	0.833	-0.0094	0.975	0.1131	NA	0	0	0	0	0	0	0	0	0
Tb927.3.5350	hypothetical protein, conserved, no known domains	ZUnknown	492.4	-0.1224	NA	-0.1551	0.496	-0.1591	0.42	-0.0367	NA	0	0	0	0	0	0	0	0	0
Tb927.7.710	heat shock 70 kDa protein, putative (HSP70.4)	Chaperone	5361.6	-0.1223	0.563	-0.1533	0.188	-0.1807	0.0599	-0.0584	0.813	0	0	0	0	0	0	0	0	0
Tb927.6.4640	hypothetical protein, conserved	ZUnknown	2085.5	-0.1223	0.704	-0.1404	0.337	-0.1507	0.234	-0.0284	0.938	0	0	0	0	0	0	0	0	0
Tb927.11.16510	cytochrome b/c1 complex component, putative	Mito.e.transport	583	-0.1222	NA	-0.1973	0.303	-0.2413	0.118	-0.1191	NA	0	0	0	0	0	0	0	0	0
Tb927.8.4500	eIF4G5	Translation	3004	-0.122	0.645	-0.1532	0.232	-0.1779	0.0998	-0.0558	0.836	0	0	0	0	0	0	0	0	0
Tb927.11.16310	myosin heavy chain, putative, in MCM-BP-TAP	Cytoskeleton	1089.8	-0.1217	0.835	-0.1894	0.242	-0.2395	0.0619	-0.1178	0.612	0	0	0	0	0	0	0	0	0
Tb927.9.13150	TFIIF-stimulated CTD phosphatase, putative	Protein.phosphatase	599.8	-0.1216	NA	-0.1793	0.366	-0.2087	0.202	-0.0871	NA	0	0	0	0	0	0	0	0	0
Tb927.11.13210	hypothetical protein, conserved	ZUnknown	463.8	-0.1215	NA	-0.1333	0.599	-0.1248	0.565	-0.0033	NA	0	0	0	0	0	0	0	0	0
Tb927.11.14500	Protein kinase domain containing protein, putative	ZUnknown	588.3	-0.1215	NA	-0.1243	0.605	-0.1103	0.602	0.0112	NA	0	0	0	0	0	0	0	0	0
Tb927.9.10310	mitochondrial carrier protein, MCP11	Mito.transport	1873.8	-0.1214	0.781	-0.1885	0.218	-0.2472	0.033	-0.1258	0.519	0	0	0	0	0	0	0	0	0
Tb927.4.3850	WDR12	rRNA.tRNA.process	823.1	-0.1214	0.87	-0.1121	0.627	-0.0938	0.642	0.0276	NA	0	0	0	0	0	0	0	0	0
Tb927.7.2810	hypothetical protein, conserved, trypanosome-specific	ZUnknown	1102	-0.1213	0.825	-0.2416	0.132	-0.3573	0.00101	-0.2359	0.0666	0	0	0	0	0	0	0	0	0
Tb927.10.12540	electron transfer protein, putative,ferredoxin, putative	Mito.e.transport	442.6	-0.1213	NA	-0.1617	0.48	-0.1723	0.371	-0.0509	NA	0	0	0	0	0	0	0	0	0
Tb927.6.3850	chaperone DNAj, putative, J9	Chaperone	223.7	-0.121	NA	-0.1066	0.759	-0.0693	0.821	0.0517	NA	0	0	0	0	0	0	0	0	0
Tb927.11.9640	glycyl-tRNA synthetase, putative	Translation.tRNA	3243.7	-0.121	0.623	-0.0951	0.564	-0.0684	0.645	0.0526	0.841	0	0	0	0	0	0	0	0	0
Tb927.8.2670	Putative S-adenosyl-L-methionine-dependent methyltransferase, putative	Mito.pathway	552.3	-0.1209	NA	-0.165	0.455	-0.1803	0.324	-0.0594	NA	0	0	0	0	0	0	0	0	0
Tb927.11.6780	regulator of chromatin condensation, putative (RCC1)	Chromatin	727	-0.1208	0.892	-0.1451	0.516	-0.1495	0.433	-0.0287	NA	0	0	0	0	0	0	0	0	0
Tb927.10.2490	glucose-6-phosphate 1-dehydrogenase (G6PD)	Glucose.glycerol	1842.7	-0.1207	0.754	-0.186	0.2	-0.2426	0.0274	-0.1219	0.509	0	0	0	0	0	0	0	0	0
Tb927.9.10080	phosphatidylserine decarboxylase, putative	Lipids	433.7	-0.1207	NA	-0.1082	0.724	-0.0773	0.772	0.0434	NA	0	0	0	0	0	0	0	0	0
Tb927.3.1660	hypothetical protein, conserved	ZUnknown	2096.5	-0.1206	0.774	-0.2188	0.151	-0.3118	0.00288	-0.1912	0.178	0	0	0	0	0	0	0	0	0
Tb927.3.4650	C-8 sterol isomerase, putative	Sterols	189.4	-0.1205	NA	-0.1849	0.498	-0.1883	0.403	-0.0678	NA	0	0	0	0	0	0	0	0	0
Tb927.10.3970	hypothetical protein, conserved	ZUnknown	959.7	-0.1205	0.892	-0.1517	0.497	-0.1662	0.366	-0.0457	0.925	0	0	0	0	0	0	0	0	0
Tb927.11.11380	hypothetical protein, conserved	Mito.pathway	996.6	-0.1204	0.869	-0.1794	0.316	-0.2196	0.119	-0.0992	0.728	0	0	0	0	0	0	0	0	0
Tb927.11.11210	paraflagellar rod protein PFC17	Cytoskeleton	1271.7	-0.1204	0.802	-0.1409	0.408	-0.1496	0.307	-0.0293	0.943	0	0	0	0	0	0	0	0	0
Tb927.10.2750	deoxyhypusine synthase	Amino.acids	769.2	-0.1203	0.875	-0.1173	0.604	-0.1029	0.607	0.0174	NA	0	0	0	0	0	0	0	0	0
Tb927.10.10650	NAR1 Cytosolic iron-sulphur cluster biogenesis, hydrogenase large subunit	Enzyme	721.9	-0.1202	0.878	-0.1323	0.523	-0.1292	0.485	-0.009	NA	0	0	0	0	0	0	0	0	0
Tb927.9.13040	hypothetical protein, conserved	ZUnknown	723.7	-0.1202	0.878	-0.1147	0.616	-0.0983	0.622	0.0219	NA	0	0	0	0	0	0	0	0	0
Tb927.10.4290	hypothetical protein, conserved	ZUnknown	665.5	-0.1202	0.886	-0.1085	0.661	-0.0864	0.687	0.0338	NA	0	0	0	0	0	0	0	0	0
Tb927.6.2630	Hsp33 protein, putative	Mito.pathway	713.5	-0.1202	0.886	-0.0866	0.759	-0.0481	0.853	0.0721	NA	0	0	0	0	0	0	0	0	0
Tb927.6.2720	calcium-binding protein, putative	Calcium	884.4	-0.1201	0.878	-0.1555	0.439	-0.1725	0.301	-0.0523	NA	0	0	0	0	0	0	0	0	0
Tb927.5.2140	UPF1	RNA.degradation	2552.8	-0.12	0.763	-0.1555	0.326	-0.1841	0.143	-0.0642	0.836	0	0	0	0	0	0	0	0	0
Tb927.11.15810	NADH dehydrogenase subunit NI2M, putative	Mito.e.transport	437.7	-0.12	NA	-0.0806	0.813	-0.0346	0.908	0.0855	NA	0	0	0	0	0	0	0	0	0
Tb927.7.660	Cupin-like domain containing protein, putative	ZUnknown	603.8	-0.1198	NA	-0.1508	0.48	-0.1588	0.388	-0.039	NA	0	0	0	0	0	0	0	0	0
Tb927.5.1210	short-chain dehydrogenase, putative	Enzyme	3682	-0.1198	0.646	-0.0453	0.859	0.0296	0.875	0.1494	0.267	0	0	0	0	0	0	0	0	0
Tb927.11.7960	kPAP kinetoplast poly(A) polymerase 1	Mito.RNA	763.7	-0.1197	0.886	-0.1041	0.682	-0.0789	0.723	0.0408	NA	0	0	0	0	0	0	0	0	0
Tb927.10.13670	serine/threonine protein phosphatase 5, PP5, interacts with HSP83	Protein.phosphatase	2161.8	-0.1196	0.731	-0.1801	0.2	-0.2328	0.0292	-0.1132	0.543	0	0	0	0	0	0	0	0	0
Tb927.10.4240	hypothetical protein, conserved	Mito.pathway	341	-0.1196	NA	-0.0947	0.79	-0.0561	0.855	0.0635	NA	0	0	0	0	0	0	0	0	0
Tb927.10.4640	eIF3L	Translation	2350.7	-0.1195	0.709	-0.1163	0.464	-0.1089	0.435	0.0106	0.993	0	0	0	0	0	0	0	0	0
Tb927.10.15070	hypothetical protein, conserved	ZUnknown	153.4	-0.1194	NA	-0.1717	0.568	-0.1545	0.532	-0.0351	NA	0	0	0	0	0	0	0	0	0
Tb927.9.4560	RBP32	RNA.binding	1277.1	-0.1194	0.843	-0.1053	0.63	-0.0853	0.655	0.0341	0.936	0	0	0	0	0	0	0	0	0
Tb927.10.14610	leucine-rich repeat protein (LRRP)	LRRP	2306.8	-0.1193	0.763	-0.082	0.718	-0.0439	0.833	0.0754	0.783	0	0	0	0	0	0	0	0	0
Tb927.5.3760	SPO11 meiotic recombination protein	DNA	324	-0.1192	NA	-0.1651	0.507	-0.1734	0.41	-0.0542	NA	0	0	0	0	0	0	0	0	0
Tb927.7.3610	hypothetical protein, conserved	ZUnknown	1046.8	-0.1191	0.861	-0.1299	0.498	-0.129	0.443	-0.0099	0.996	0	0	0	0	0	0	0	0	0
Tb927.11.720	hypothetical protein, conserved	Cytoskeleton	1956.7	-0.119	0.774	-0.2206	0.147	-0.3233	0.00146	-0.2042	0.111	0	0	0	0	0	0	0	0	0
Tb927.6.3200	hypothetical protein, conserved	ZUnknown	170.9	-0.119	NA	-0.116	0.745	-0.0802	0.788	0.0389	NA	0	0	0	0	0	0	0	0	0
Tb927.7.5680	deoxyribose-phosphate aldolase, putative	Enzyme	406.3	-0.119	NA	-0.1073	0.719	-0.0812	0.754	0.0377	NA	0	0	0	0	0	0	0	0	0
Tb927.4.4720	KRIPP7/TbPPR7 Kinetoplast ribosomal PPR-repeat containing protein	Mito.translation	629.9	-0.1189	NA	-0.08	0.784	-0.0371	0.89	0.0817	NA	0	0	0	0	0	0	0	0	0
Tb927.6.3830	hypothetical protein, conserved	ZUnknown	351.4	-0.1189	NA	-0.059	0.872	0.0033	0.993	0.1222	NA	0	0	0	0	0	0	0	0	0
Tb927.10.7300	hypothetical protein, conserved	ZUnknown	660.6	-0.1188	0.903	-0.2575	0.194	-0.3829	0.00607	-0.264	NA	0	0	0	0	0	1	0	0	1
Tb927.10.15180	nucleosome assembly protein, putative	ZUnknown	2545.4	-0.1188	0.717	-0.1362	0.356	-0.1471	0.242	-0.0282	0.938	0	0	0	0	0	0	0	0	0
Tb927.3.1940	hypothetical protein, possible component of cytochorome oxidase complex	Mito.e.transport	432	-0.1188	NA	-0.1284	0.645	-0.1164	0.618	0.0024	NA	0	0	0	0	0	0	0	0	0
Tb927.11.7170	seryl-tRNA synthetase, putative	Translation.tRNA	2716.6	-0.1188	0.711	-0.1238	0.424	-0.1237	0.353	-0.0049	0.998	0	0	0	0	0	0	0	0	0
Tb927.6.4710	calmodulin, putative	Calcium	1696.4	-0.1187	0.829	-0.1046	0.627	-0.0863	0.638	0.0324	0.938	0	0	0	0	0	0	0	0	0
Tb927.7.2980	Nitroreductase family, putative	ZUnknown	1191.3	-0.1186	0.869	-0.1249	0.547	-0.1212	0.499	-0.0026	0.998	0	0	0	0	0	0	0	0	0
Tb927.11.14260	atypical dual specificity phosphatase, putative	Phosphatase	381.6	-0.1184	NA	-0.1704	0.489	-0.1838	0.364	-0.0654	NA	0	0	0	0	0	0	0	0	0
Tb927.11.3990	hypothetical protein, conserved	ZUnknown	743.2	-0.1183	0.886	-0.1661	0.403	-0.192	0.233	-0.0737	NA	0	0	0	0	0	0	0	0	0
Tb927.3.1960	hypothetical protein, conserved	ZUnknown	252.7	-0.1183	NA	-0.1298	0.674	-0.106	0.682	0.0123	NA	0	0	0	0	0	0	0	0	0
Tb927.11.15700	hypothetical protein, conserved	ZUnknown	127.8	-0.1182	NA	-0.1625	0.609	-0.1443	0.567	-0.0261	NA	0	0	0	0	0	0	0	0	0
Tb927.3.2810	hypothetical protein, conserved	ZUnknown	2146	-0.1179	0.732	-0.1087	0.512	-0.0955	0.528	0.0224	0.953	0	0	0	0	0	0	0	0	0
Tb927.11.15100	Tb5.20 cytoskeletal protein	Cytoskeleton	33254.9	-0.1179	0.629	-0.0794	0.687	-0.0402	0.821	0.0777	0.733	0	0	0	0	0	0	0	0	0
Tb927.10.4960	hypothetical protein	ZUnknown	21.5	-0.1177	NA	-0.0936	0.754	-0.015	0.957	0.1027	NA	0	0	0	0	0	0	0	0	0
Tb927.11.1990	arginyl-tRNA synthetase, putative	Translation.tRNA	2746.3	-0.1174	0.739	-0.1744	0.219	-0.2259	0.0356	-0.1085	0.584	0	0	0	0	0	0	0	0	0
Tb927.8.720	CIA2B, Fe-S cluster biogenesis	Enzyme	340.8	-0.1173	NA	-0.1745	0.489	-0.1889	0.358	-0.0716	NA	0	0	0	0	0	0	0	0	0
Tb927.11.9500	hypothetical protein, conserved	ZUnknown	313	-0.1173	NA	-0.1565	0.55	-0.1594	0.468	-0.0421	NA	0	0	0	0	0	0	0	0	0
Tb927.4.1640	UDP-galactose transporter, putative	Glycans	962.2	-0.1171	0.869	-0.1532	0.401	-0.1728	0.254	-0.0557	0.885	0	0	0	0	0	0	0	0	0
Tb927.11.8230	hypothetical protein, conserved	ZUnknown	781.9	-0.1171	0.885	-0.098	0.698	-0.0713	0.752	0.0458	NA	0	0	0	0	0	0	0	0	0
Tb927.1.710	phosphoglycerate kinase (PGKB)	Glucose.glycerol	6166	-0.1169	0.754	-0.0763	0.745	-0.0358	0.86	0.0811	0.761	0	0	0	0	0	0	0	0	0
Tb927.6.630	hypothetical protein, conserved	ZUnknown	1557.5	-0.1168	0.809	-0.1514	0.344	-0.1749	0.188	-0.0581	0.861	0	0	0	0	0	0	0	0	0
Tb927.5.2860	Protein of unknown function (DUF2453), putative	ZUnknown	912	-0.1168	0.878	-0.1085	0.64	-0.0919	0.646	0.0249	0.963	0	0	0	0	0	0	0	0	0
Tb927.10.10120	hypothetical protein, conserved	Mito.pathway	1321.2	-0.1167	0.818	-0.065	0.803	-0.0142	0.956	0.1025	0.665	0	0	0	0	0	0	0	0	0
Tb927.5.3200	hypothetical protein, conserved	ZUnknown	517.5	-0.1166	NA	-0.2402	0.207	-0.3342	0.0172	-0.2176	NA	0	0	0	0	0	0	0	0	0
Tb927.11.240	hypothetical protein, conserved	Mito.pathway	1678	-0.1166	0.802	-0.1396	0.403	-0.1531	0.269	-0.0365	0.925	0	0	0	0	0	0	0	0	0
Tb927.9.7590	60S ribosomal protein L11	Ribosome	7159.1	-0.1166	0.62	0.0387	0.911	0.2248	0.0122	0.3414	1.7e-05	0	0	0	0	0	0	0	0	0
Tb927.8.5960	hypothetical protein, conserved	ZUnknown	407	-0.1162	NA	-0.1182	0.67	-0.1	0.672	0.0162	NA	0	0	0	0	0	0	0	0	0
Tb927.11.5990	Mitchondrial LSU ribosomal protein	Mito.translation	829	-0.1161	0.878	-0.1757	0.333	-0.2139	0.14	-0.0977	NA	0	0	0	0	0	0	0	0	0
Tb927.11.5630	hypothetical protein, conserved	ZUnknown	646.1	-0.116	0.892	-0.175	0.368	-0.2081	0.186	-0.0922	NA	0	0	0	0	0	0	0	0	0
Tb927.5.2680	hypothetical protein, conserved	ZUnknown	1084.9	-0.116	0.869	-0.1017	0.645	-0.0815	0.672	0.0345	0.934	0	0	0	0	0	0	0	0	0
Tb927.10.7130	hypothetical protein, conserved	ZUnknown	1092.5	-0.1159	0.869	-0.061	0.827	-0.0066	0.98	0.1093	0.666	0	0	0	0	0	0	0	0	0
Tb927.7.4900	XRNA	RNA.degradation	4159.8	-0.1158	0.725	-0.0631	0.794	-0.0094	0.966	0.1064	0.584	0	0	0	0	0	0	0	0	0
Tb927.10.8190	Tric complex theta subunit (TCP-1-theta)	Chaperone	4509.1	-0.1155	0.731	-0.0954	0.612	-0.0731	0.65	0.0425	0.9	0	0	0	0	0	0	0	0	0
Tb927.10.5720	hypothetical protein	ZUnknown	136	-0.1154	NA	-0.1881	0.507	-0.1822	0.429	-0.0668	NA	0	0	0	0	0	0	0	0	0
Tb927.10.13060	hypothetical protein	ZUnknown	80.9	-0.1154	NA	-0.1597	0.623	-0.1234	0.623	-0.008	NA	0	0	0	0	0	0	0	0	0
Tb927.11.13820	hypothetical protein, conserved	ZUnknown	731.4	-0.1154	0.9	-0.0563	0.862	0.0031	0.993	0.1185	NA	0	0	0	0	0	0	0	0	0
Tb927.4.2560	Cardolipin synthase	Lipids	953.3	-0.1153	0.872	-0.1091	0.616	-0.0946	0.618	0.0207	0.97	0	0	0	0	0	0	0	0	0
Tb927.9.1810	60S ribosomal protein L35	Ribosome	5306.1	-0.115	0.7	-0.0165	0.961	0.0875	0.543	0.2025	0.0664	0	0	0	0	0	0	0	0	0
Tb927.10.1720	ATP-dependent DEAD/H RNA helicase, putative, no clear yeast homologue	RNA.helicase	1101	-0.1149	0.869	-0.1691	0.325	-0.2068	0.128	-0.0919	0.747	0	0	0	0	0	0	0	0	0
Tb927.10.14840	mitochondrial carrier protein, MCP5c ATP/ADP carrier	Mito.transport	2755.2	-0.1148	0.825	-0.1293	0.481	-0.1386	0.353	-0.0238	0.961	0	0	0	0	0	0	0	0	0
Tb927.10.14800	MAPK9 protein kinase	Protein.kinase	768.9	-0.1146	0.898	-0.1816	0.341	-0.2251	0.137	-0.1105	NA	0	0	0	0	0	0	0	0	0
Tb927.10.2330	hypothetical protein, conserved	ZUnknown	600.8	-0.1146	NA	-0.1659	0.423	-0.1907	0.258	-0.0761	NA	0	0	0	0	0	0	0	0	0
Tb927.10.1950	leucine-rich repeat protein (LRRP)	LRRP	1036.4	-0.1145	0.878	-0.1216	0.563	-0.1176	0.517	-0.0032	0.998	0	0	0	0	0	0	0	0	0
Tb927.3.580	leucine-rich repeat protein (LRRP)	LRRP	509.5	-0.1145	NA	-0.0509	0.891	0.0144	0.964	0.1289	NA	0	0	0	0	0	0	0	0	0
Tb927.11.14740	YqaJ-like viral recombinase domain containing protein, putative	ZUnknown	1064.7	-0.1144	0.873	-0.2309	0.169	-0.3412	0.00295	-0.2268	0.105	0	0	0	0	0	0	0	0	0
Tb927.11.11110	NEK20 protein kinase	Protein.kinase	350.4	-0.1144	NA	-0.0964	0.761	-0.0631	0.824	0.0513	NA	0	0	0	0	0	0	0	0	0
Tb927.11.8290	DIS3L2, RNaseB motif protein, no PIN domain	RNA.degradation	1739.7	-0.1143	0.802	-0.1655	0.269	-0.2063	0.0835	-0.0919	0.701	0	0	0	0	0	0	0	0	0
Tb927.4.3180	hypothetical protein, conserved	ZUnknown	299.2	-0.1141	NA	-0.2035	0.385	-0.2411	0.194	-0.127	NA	0	0	0	0	0	0	0	0	0
Tb927.9.2580	deoxyhypusine hydroxylase, putative	Translation	818.5	-0.1141	0.888	-0.1479	0.46	-0.1642	0.319	-0.0501	NA	0	0	0	0	0	0	0	0	0
Tb927.10.12740	ZC3H35	RNA.binding	970.8	-0.1141	0.886	-0.1471	0.464	-0.1645	0.317	-0.0504	0.902	0	0	0	0	0	0	0	0	0
Tb927.9.1570	protein kinase, putative	Protein.kinase	538.9	-0.114	NA	-0.1555	0.478	-0.1717	0.344	-0.0578	NA	0	0	0	0	0	0	0	0	0
Tb927.11.5540	emp24/gp25L/p24 family/GOLD, putative	Vesicular.transport	319.9	-0.114	NA	-0.1239	0.675	-0.1063	0.67	0.0077	NA	0	0	0	0	0	0	0	0	0
Tb927.2.4000	hypothetical protein, conserved	ZUnknown	1271.4	-0.114	0.852	-0.1197	0.517	-0.1165	0.481	-0.0025	0.998	0	0	0	0	0	0	0	0	0
Tb927.11.11940	protein phosphatase 2A, putative	Protein.phosphatase	673.5	-0.1139	0.9	-0.1093	0.661	-0.0926	0.664	0.0213	NA	0	0	0	0	0	0	0	0	0
Tb927.2.950	paraflagellar rod protein PFC13	Cytoskeleton	23244.8	-0.1137	0.724	-0.1567	0.278	-0.1993	0.0618	-0.0856	0.715	0	0	0	0	0	0	0	0	0
Tb927.3.4620	AAA domain containing protein, putative	ZUnknown	3630.6	-0.1137	0.717	-0.1115	0.475	-0.1064	0.427	0.0073	0.997	0	0	0	0	0	0	0	0	0
Tb927.10.3410	hypothetical protein	ZUnknown	163	-0.1136	NA	-0.2646	0.263	-0.3287	0.0708	-0.2152	NA	0	0	0	0	0	0	0	0	0
Tb927.3.3830	hypothetical protein, conserved	ZUnknown	835.8	-0.1135	0.89	-0.1667	0.376	-0.1991	0.191	-0.0856	NA	0	0	0	0	0	0	0	0	0
Tb927.10.6820	hypothetical protein, conserved	ZUnknown	509.9	-0.1135	NA	-0.1405	0.551	-0.1434	0.478	-0.0298	NA	0	0	0	0	0	0	0	0	0
Tb927.3.1560	TIF2 ttaggg binding factor interacting	DNA	525.7	-0.1135	NA	-0.1121	0.672	-0.0954	0.673	0.0181	NA	0	0	0	0	0	0	0	0	0
Tb927.11.14440	PPR repeat family, putative	ZUnknown	1149.6	-0.1134	0.87	-0.1667	0.334	-0.2042	0.137	-0.0908	0.751	0	0	0	0	0	0	0	0	0
Tb927.1.4280	hypothetical protein, conserved, African tryp specific, PTZ (tail-specific protease) domain	ZUnknown	1671.9	-0.1134	0.822	-0.1544	0.332	-0.1843	0.146	-0.0709	0.809	0	0	0	0	0	0	0	0	0
Tb927.1.3830	glucose-6-phosphate isomerase, glycosomal (PGI)	Glucose.glycerol	8347	-0.1134	0.869	-0.1004	0.672	-0.0858	0.651	0.0277	0.952	0	0	0	0	0	0	0	0	0
Tb927.8.890	Ras-related protein Rab1A	Vesicular.transport	2495.7	-0.1132	0.886	-0.16	0.436	-0.2001	0.186	-0.0869	0.803	0	0	0	0	0	0	0	0	0
Tb927.11.7890	ZC3H44	RNA.binding	811.8	-0.1132	0.886	-0.1104	0.627	-0.0978	0.618	0.0154	NA	0	0	0	0	0	0	0	0	0
Tb927.11.8220	AUK1 aurora B kinase	Cell.cycle	601.3	-0.113	NA	-0.232	0.216	-0.3269	0.0164	-0.2139	NA	0	0	0	0	0	0	0	0	0
Tb927.9.6270	hypothetical protein, conserved	ZUnknown	871.3	-0.113	0.888	-0.1266	0.546	-0.1272	0.483	-0.0142	NA	0	0	0	0	0	0	0	0	0
Tb927.11.910	hypothetical protein, conserved	ZUnknown	1909.2	-0.113	0.8	-0.0897	0.661	-0.064	0.722	0.049	0.886	0	0	0	0	0	0	0	0	0
Tb927.6.2520	hypothetical protein, conserved	ZUnknown	1867.5	-0.113	0.869	-0.0889	0.712	-0.0611	0.77	0.0519	0.898	0	0	0	0	0	0	0	0	0
Tb927.1.890	hypothetical protein, conserved	ZUnknown	570.5	-0.113	NA	-0.0809	0.795	-0.0418	0.881	0.0712	NA	0	0	0	0	0	0	0	0	0
Tb927.11.13460	hypothetical protein, conserved, 2 Kelch domains, possible galactose oxidase	ZUnknown	868.5	-0.113	0.89	-0.0541	0.858	0.0044	0.989	0.1174	NA	0	0	0	0	0	0	0	0	0
Tb927.6.1900	U3/U14 snoRNA-associated small subunit rRNA processing protein, =yeast Enp1	rRNA.tRNA.process	1075.9	-0.1129	0.875	-0.1115	0.593	-0.1016	0.578	0.0113	0.994	0	0	0	0	0	0	0	0	0
Tb927.11.2000	Cupin-like domain containing protein, putative	ZUnknown	1012.4	-0.1128	0.9	-0.1224	0.603	-0.1203	0.538	-0.0075	0.997	0	0	0	0	0	0	0	0	0
Tb927.1.3390	Eukaryotic protein of unknown function (DUF866), putative	ZUnknown	703.4	-0.1128	0.905	-0.0102	0.983	0.0892	0.697	0.202	NA	0	0	0	0	0	0	0	0	0
Tb927.10.4930	protein phosphatase 2C, putative	Protein.phosphatase	363.4	-0.1127	NA	-0.133	0.63	-0.1251	0.593	-0.0124	NA	0	0	0	0	0	0	0	0	0
Tb927.2.2160	paraflagellar rod protein PFC11	Cytoskeleton	1726.1	-0.1126	0.842	-0.1891	0.227	-0.2578	0.0239	-0.1452	0.408	0	0	0	0	0	0	0	0	0
Tb927.7.4590	chaperone DNAj, putative, J35	Chaperone	884	-0.1125	0.886	-0.1306	0.515	-0.134	0.44	-0.0215	NA	0	0	0	0	0	0	0	0	0
Tb927.11.3590	40S ribosomal protein S4	Ribosome	9879.8	-0.1124	0.591	-0.0168	0.957	0.0833	0.499	0.1957	0.0328	0	0	0	0	0	0	0	0	0
Tb927.11.10670	glycosyl hydrolase, putative	Glycans	1323.1	-0.1122	0.869	-0.1636	0.337	-0.2011	0.13	-0.0889	0.751	0	0	0	0	0	0	0	0	0
Tb927.11.12250	DNA replication licensing factor MCM4	DNA	1144	-0.1122	0.87	-0.1198	0.536	-0.118	0.487	-0.0058	0.998	0	0	0	0	0	0	0	0	0
Tb927.9.1540	protein phosphatase 2B, putative	Protein.phosphatase	595.7	-0.1121	NA	-0.2022	0.298	-0.2627	0.0788	-0.1506	NA	0	0	0	0	0	0	0	0	0
Tb927.10.5420	hypothetical protein, conserved	ZUnknown	1138.6	-0.1121	0.87	-0.1196	0.532	-0.1173	0.487	-0.0051	0.998	0	0	0	0	0	0	0	0	0
Tb927.1.110	hypothetical protein, conserved	ZUnknown	8210.1	-0.1121	0.762	-0.0919	0.64	-0.0703	0.67	0.0419	0.903	0	0	0	0	0	0	0	0	0
Tb927.8.1670	NEK14 protein kinase	Protein.kinase	1205.6	-0.112	0.869	-0.146	0.408	-0.1665	0.25	-0.0545	0.881	0	0	0	0	0	0	0	0	0
Tb927.10.920	Ribosomal protein L1p/L10e family, putative	ZUnknown	530.3	-0.1118	NA	-0.2062	0.323	-0.2678	0.0903	-0.1559	NA	0	0	0	0	0	0	0	0	0
Tb927.2.3970	hypothetical protein, conserved	ZUnknown	388.3	-0.1117	NA	-0.1511	0.546	-0.1565	0.456	-0.0448	NA	0	0	0	0	0	0	0	0	0
Tb927.9.10250	small nuclear ribonucleoprotein Sm-F	RNA.processing	476.9	-0.1116	NA	-0.1283	0.661	-0.1215	0.61	-0.0099	NA	0	0	0	0	0	0	0	0	0
Tb927.10.8360	PARN-2	RNA.degradation	733.4	-0.1115	0.906	-0.1438	0.527	-0.1559	0.411	-0.0444	NA	0	0	0	0	0	0	0	0	0
Tb927.4.3680	protein phosphatase 2C, putative	Protein.phosphatase	540.9	-0.1115	NA	-0.0984	0.724	-0.0747	0.761	0.0368	NA	0	0	0	0	0	0	0	0	0
Tb927.10.14920	hypothetical protein, conserved, no clear yeast or human match	ZUnknown	2820.8	-0.1115	0.739	-0.0939	0.591	-0.0745	0.627	0.037	0.913	0	0	0	0	0	0	0	0	0
Tb927.11.2180	hypothetical protein, conserved	ZUnknown	951.2	-0.1113	0.888	-0.0488	0.873	0.0132	0.963	0.1244	0.609	0	0	0	0	0	0	0	0	0
Tb927.10.7810	Homologue of yeast ESF1,nucleolar protein involved in pre-rRNA processing	rRNA.tRNA.process	1755.4	-0.1113	0.875	-0.0483	0.873	0.0161	0.954	0.1274	0.576	0	0	0	0	0	0	0	0	0
Tb927.10.7520	folylpolyglutamate synthase, putative (FPGS)	Folate	700.6	-0.1113	0.9	-0.0274	0.938	0.053	0.832	0.1643	NA	0	0	0	0	0	0	0	0	0
Tb927.3.5610	ribosomal protein L3 mitochondrial, putative	Mito.translation	606.8	-0.1112	NA	-0.1685	0.413	-0.1984	0.234	-0.0873	NA	0	0	0	0	0	0	0	0	0
Tb927.10.15510	hypothetical protein, conserved	ZUnknown	305.4	-0.1111	NA	-0.0365	0.932	0.0397	0.9	0.1508	NA	0	0	0	0	0	0	0	0	0
Tb927.4.2120	hypothetical protein, conserved	ZUnknown	514	-0.1109	NA	-0.0791	0.8	-0.0413	0.885	0.0696	NA	0	0	0	0	0	0	0	0	0
Tb927.3.1990	Tetratricopeptide repeat, putative	ZUnknown	790.1	-0.1107	0.892	-0.0836	0.747	-0.0523	0.829	0.0585	NA	0	0	0	0	0	0	0	0	0
Tb927.3.2130	RNA pseudouridylate synthase, putative	Mito.pathway	1014	-0.1106	0.886	-0.0523	0.858	0.0055	0.985	0.1161	0.634	0	0	0	0	0	0	0	0	0
Tb927.11.3880	actin, putative (TRYPARP)	Cytoskeleton	867.9	-0.1105	0.892	-0.1261	0.535	-0.1276	0.472	-0.0171	NA	0	0	0	0	0	0	0	0	0
Tb927.9.7160	hypothetical protein, conserved	ZUnknown	490.1	-0.1105	NA	-0.0309	0.938	0.0477	0.864	0.1583	NA	0	0	0	0	0	0	0	0	0
Tb927.2.4460	hypothetical protein, conserved	ZUnknown	835.9	-0.1103	0.9	-0.1155	0.625	-0.1081	0.591	0.0022	NA	0	0	0	0	0	0	0	0	0
Tb927.5.520	stomatin-like protein, putative	Mito.pathway	874.9	-0.1102	0.895	-0.1102	0.629	-0.1008	0.607	0.0094	NA	0	0	0	0	0	0	0	0	0
Tb927.11.14810	hypothetical protein, conserved	ZUnknown	290.8	-0.1102	NA	-0.0915	0.793	-0.0547	0.855	0.0554	NA	0	0	0	0	0	0	0	0	0
Tb927.11.1980	ZC3H41	RNA.binding	5606	-0.1101	0.7	-0.0864	0.62	-0.0616	0.68	0.0484	0.864	0	0	0	0	0	0	0	0	0
Tb927.8.5670	hypothetical protein, conserved	ZUnknown	266.1	-0.11	NA	-0.1784	0.495	-0.1968	0.35	-0.0868	NA	0	0	0	0	0	0	0	0	0
Tb927.11.6750	DNA ligase, putative	DNA	724	-0.1099	0.916	-0.1848	0.397	-0.235	0.153	-0.1251	NA	0	0	0	0	0	0	0	0	0
Tb927.11.8770	eIF4AIII or ATP-dependent RNA helicase FAL1 - was	rRNA.tRNA.process	1280.9	-0.1098	0.869	-0.1308	0.455	-0.1408	0.341	-0.031	0.938	0	0	0	0	0	0	0	0	0
Tb927.10.3960	hypothetical protein, conserved	ZUnknown	331.1	-0.1097	NA	-0.2379	0.278	-0.3187	0.0546	-0.209	NA	0	0	0	0	0	0	0	0	0
Tb927.6.4730	hypothetical protein	ZUnknown	565.2	-0.1097	NA	-0.2133	0.341	-0.2869	0.0829	-0.1772	NA	0	0	0	0	0	0	0	0	0
Tb927.1.5000	hypothetical protein, conserved, possibly mitochondrial, no yeast or human match	Mito.pathway	545	-0.1097	NA	-0.1131	0.663	-0.1011	0.644	0.0087	NA	0	0	0	0	0	0	0	0	0
Tb927.10.14860	Complex 1 protein (LYR family), putative	Mito.e.transport	1238.8	-0.1096	0.878	-0.1925	0.244	-0.2622	0.0314	-0.1526	0.4	0	0	0	0	0	0	0	0	0
Tb927.7.680	chaperone DNAj, putative, J25	Chaperone	1534.7	-0.1096	0.869	-0.1616	0.33	-0.202	0.117	-0.0924	0.722	0	0	0	0	0	0	0	0	0
Tb927.9.5380	TBC-H likely GAP	Signalling	1055.5	-0.1096	0.886	-0.148	0.438	-0.1711	0.263	-0.0615	0.865	0	0	0	0	0	0	0	0	0
Tb927.7.2400	MCP1 Arc1p homologue, assists aa tRNA synthetases	Translation.tRNA	1488.5	-0.1096	0.869	-0.1479	0.387	-0.1748	0.204	-0.0652	0.836	0	0	0	0	0	0	0	0	0
Tb927.4.4650	diphthine synthase, putative	Enzyme	586.6	-0.1096	NA	-0.088	0.759	-0.0585	0.821	0.0512	NA	0	0	0	0	0	0	0	0	0
Tb927.2.3190	Got1/Sft2-like family, putative	ZUnknown	235.9	-0.1095	NA	-0.1448	0.65	-0.1336	0.602	-0.0241	NA	0	0	0	0	0	0	0	0	0
Tb927.11.10410	Cornichon protein, putative	ZUnknown	240.9	-0.1095	NA	-0.1204	0.714	-0.1009	0.701	0.0086	NA	0	0	0	0	0	0	0	0	0
Tb927.11.16150	tubulin binding cofactor A, putative	Cytoskeleton	666.8	-0.1094	0.913	-0.1916	0.341	-0.2472	0.111	-0.1378	NA	0	0	0	0	0	0	0	0	0
Tb927.10.12890	bifunctional aminoacyl-tRNA synthetase, putative	Translation.tRNA	5130.8	-0.1094	0.697	-0.1416	0.263	-0.17	0.0928	-0.0606	0.807	0	0	0	0	0	0	0	0	0
Tb927.11.700	hypothetical protein, conserved	ZUnknown	632.6	-0.1092	NA	-0.1561	0.472	-0.1781	0.314	-0.0689	NA	0	0	0	0	0	0	0	0	0
Tb927.11.1920	hypothetical protein	ZUnknown	57.4	-0.109	NA	-0.108	0.771	-0.0583	0.846	0.0507	NA	0	0	0	0	0	0	0	0	0
Tb927.8.4300	hypothetical protein	ZUnknown	178.8	-0.1089	NA	-0.2393	0.352	-0.2906	0.129	-0.1818	NA	0	0	0	0	0	0	0	0	0
Tb927.4.4200	hypothetical protein, conserved	ZUnknown	261.3	-0.1089	NA	-0.1742	0.497	-0.191	0.361	-0.0821	NA	0	0	0	0	0	0	0	0	0
Tb927.1.4680	KKIP6 Kinetochore interacting protein 6	Cell.cycle	579.1	-0.1089	NA	-0.0097	0.983	0.0869	0.707	0.1958	NA	0	0	0	0	0	0	0	0	0
Tb927.3.1480	RNI-like superfamily protein, leucine-rich repeats, E-K-R-rich N-terminus	ZUnknown	381	-0.1088	NA	-0.0515	0.898	0.0112	0.975	0.12	NA	0	0	0	0	0	0	0	0	0
Tb927.3.2210	KIF-1 binding protein C terminal, putative	ZUnknown	970.6	-0.1087	0.892	-0.1662	0.357	-0.2055	0.148	-0.0968	0.733	0	0	0	0	0	0	0	0	0
Tb927.5.1600	hypothetical protein, conserved	ZUnknown	1229.3	-0.1086	0.885	-0.1382	0.464	-0.1554	0.313	-0.0468	0.904	0	0	0	0	0	0	0	0	0
Tb927.9.2910	histone acetyltransferase subunit NuA4, putative	ZUnknown	306.4	-0.1086	NA	-0.0248	0.957	0.0568	0.851	0.1654	NA	0	0	0	0	0	0	0	0	0
Tb927.8.2450	AMPKbeta	Protein.kinase	699.3	-0.1085	0.902	-0.2286	0.208	-0.3283	0.0101	-0.2198	NA	0	0	0	0	0	0	0	0	0
Tb927.9.5650	E2-like ubiquitin-conjugation enzyme, putative	Ubiquitin.proteasome	669.5	-0.1085	0.903	-0.1602	0.437	-0.1879	0.255	-0.0793	NA	0	0	0	0	0	0	0	0	0
Tb927.11.2100	Divergent AAA domain containing protein, putative	ZUnknown	760.2	-0.1085	0.9	-0.1299	0.536	-0.1349	0.452	-0.0264	NA	0	0	0	0	0	0	0	0	0
Tb927.11.3240	Tric complex zeta subunit (TCP-1-zeta)	Chaperone	5302.8	-0.1085	0.704	-0.1146	0.422	-0.1175	0.324	-0.0091	0.994	0	0	0	0	0	0	0	0	0
Tb927.1.1230	chaperone DNAj, putative, J47	Chaperone	433.4	-0.1085	NA	-0.0711	0.829	-0.0277	0.926	0.0809	NA	0	0	0	0	0	0	0	0	0
Tb927.1.2820	pteridine transporter, putative	Transporter	1636.5	-0.1085	0.87	-0.0217	0.947	0.0669	0.733	0.1753	0.282	0	0	0	0	0	0	0	0	0
Tb927.7.1430	leucine-rich repeat protein (LRRP)	LRRP	1023.3	-0.1083	0.89	-0.1328	0.492	-0.1435	0.382	-0.0352	0.934	0	0	0	0	0	0	0	0	0
Tb927.10.2670	hypothetical protein, conserved	ZUnknown	473.4	-0.1082	NA	-0.1097	0.687	-0.0958	0.676	0.0124	NA	0	0	0	0	0	0	0	0	0
Tb927.8.1470	POMP38	Mito.membrane	709.2	-0.1082	0.9	-0.0677	0.817	-0.0255	0.925	0.0827	NA	0	0	0	0	0	0	0	0	0
Tb927.11.15420	eIF3K	Translation	1052.9	-0.1081	0.913	-0.0588	0.858	-0.0085	0.978	0.0996	0.774	0	0	0	0	0	0	0	0	0
Tb927.1.1820	hypothetical PIN domain-containing protein	RNA.processing	1109.8	-0.108	0.878	-0.1927	0.237	-0.262	0.0295	-0.1539	0.381	0	0	0	0	0	0	0	0	0
Tb927.5.3170	ribose-phosphate pyrophosphokinase, putative (PRPS5)	PPP	1136.6	-0.1079	0.878	-0.1712	0.312	-0.2185	0.0907	-0.1106	0.631	0	0	0	0	0	0	0	0	0
Tb927.5.4310	Possible Lsg1 circularly permutated GTPase	rRNA.tRNA.process	1486.6	-0.1078	0.857	-0.1394	0.392	-0.16	0.234	-0.0522	0.878	0	0	0	0	0	0	0	0	0
Tb927.8.1980	UTP15 C terminal, putative	ZUnknown	1090.1	-0.1078	0.886	-0.1276	0.507	-0.1354	0.411	-0.0276	0.949	0	0	0	0	0	0	0	0	0
Tb927.4.1760	hypothetical protein, conserved	Mito.pathway	318.1	-0.1077	NA	-0.1736	0.492	-0.1971	0.33	-0.0894	NA	0	0	0	0	0	0	0	0	0
Tb927.10.2020	hexokinase (HK2)	Glucose.glycerol	18583.9	-0.1076	0.818	-0.2331	0.149	-0.3775	5.04e-05	-0.2699	0.0134	0	0	0	0	0	0	0	0	0
Tb927.11.1620	hypothetical protein, conserved	Mito.pathway	529.5	-0.1076	NA	-0.1619	0.469	-0.1866	0.303	-0.079	NA	0	0	0	0	0	0	0	0	0
Tb927.4.2680	Zeta toxin, putative	ZUnknown	1496.3	-0.1076	0.859	-0.1049	0.572	-0.0965	0.554	0.0111	0.993	0	0	0	0	0	0	0	0	0
Tb927.10.3260	Long-chain-fatty-acid--CoA ligase 5, Acyl-CoA synthetase 5 (LACS 5)	Lipids	3973	-0.1075	0.765	-0.176	0.212	-0.2431	0.012	-0.1356	0.373	0	0	0	0	0	0	0	0	0
Tb927.7.790	hypothetical protein, conserved	ZUnknown	818	-0.1074	0.9	-0.0682	0.812	-0.0278	0.914	0.0796	NA	0	0	0	0	0	0	0	0	0
Tb927.11.15880	60S ribosomal protein L27	Ribosome	6253.1	-0.1074	0.846	0.0277	0.94	0.1839	0.148	0.2913	0.00871	0	0	0	0	0	0	0	0	0
Tb927.6.1790	hypothetical protein	ZUnknown	409.9	-0.1072	NA	-0.1994	0.436	-0.2558	0.146	-0.1486	NA	0	0	0	0	0	0	0	0	0
Tb927.3.2600	ATP-dependent DEAD/H RNA helicase, putative, no clear yeast homologue	RNA.helicase	13759.8	-0.1072	0.621	-0.049	0.825	0.0096	0.96	0.1168	0.374	0	0	0	0	0	0	0	0	0
Tb927.11.210	hypothetical protein, conserved	ZUnknown	1028.3	-0.1071	0.895	-0.1087	0.623	-0.1009	0.594	0.0062	0.998	0	0	0	0	0	0	0	0	0
Tb927.11.9260	hypothetical protein, conserved	ZUnknown	577.9	-0.1071	NA	-0.0974	0.729	-0.0767	0.754	0.0304	NA	0	0	0	0	0	0	0	0	0
Tb927.10.12820	Cysteine proteinase domains by interpro but not NCBI	ZUnknown	7290.7	-0.107	0.76	-0.0989	0.563	-0.0886	0.538	0.0184	0.966	0	0	0	0	0	0	0	0	0
Tb927.11.5800	hypothetical protein, conserved	ZUnknown	1176.9	-0.107	0.9	-0.0972	0.701	-0.0811	0.695	0.0259	0.961	0	0	0	0	0	0	0	0	0
Tb927.8.8340	CRAL/TRIO domain containing protein, putative	ZUnknown	719	-0.1069	0.925	-0.0959	0.75	-0.0744	0.771	0.0325	NA	0	0	0	0	0	0	0	0	0
Tb11.02.5410	SUMO activating enzyme AOS1	Ubiquitin.proteasome	383.8	-0.1068	NA	-0.116	0.688	-0.1025	0.672	0.0044	NA	0	0	0	0	0	0	0	0	0
Tb927.3.1120	Ran or RTB2	Nuclear.transport	3912.6	-0.1068	0.725	-0.0889	0.59	-0.0699	0.628	0.0369	0.904	0	0	0	0	0	0	0	0	0
Tb927.6.4360	hypothetical protein, conserved	ZUnknown	195	-0.1068	NA	-0.0554	0.894	0.004	0.993	0.1108	NA	0	0	0	0	0	0	0	0	0
Tb927.10.10420	monothiol glutaredoxin 2	Redox	241.1	-0.1067	NA	0.0032	0.993	0.1082	0.677	0.2148	NA	0	0	0	0	0	0	0	0	0
Tb927.11.4620	hypothetical protein, conserved	ZUnknown	874.2	-0.1066	0.939	-0.1986	0.436	-0.2734	0.116	-0.1668	NA	0	0	0	0	0	0	0	0	0
Tb927.8.6350	CYC11, CYC2-like cyclin	Cell.cycle	920	-0.1064	0.903	-0.0685	0.818	-0.0278	0.918	0.0786	0.829	0	0	0	0	0	0	0	0	0
Tb927.10.7110	Inositol-3-phosphate synthase	Signalling	1533	-0.1062	0.869	-0.1764	0.256	-0.2351	0.0413	-0.1289	0.477	0	0	0	0	0	0	0	0	0
Tb927.9.15490	ADP-ribosylation factor GTPase activating protein, putative	Vesicular.transport	809.6	-0.1062	0.916	-0.164	0.441	-0.2007	0.224	-0.0945	NA	0	0	0	0	0	0	0	0	0
Tb927.9.9170	hypothetical protein, conserved, P-loop NTP hydrolase domain, no yeast or human match	ZUnknown	540.6	-0.1062	NA	-0.1462	0.512	-0.1604	0.396	-0.0542	NA	0	0	0	0	0	0	0	0	0
Tb927.9.12700	phospholipase A1, putative flippase	Lipids	1226.4	-0.1061	0.878	-0.1233	0.496	-0.1301	0.404	-0.0239	0.957	0	0	0	0	0	0	0	0	0
Tb927.6.3690	CFII	RNA.processing	540.9	-0.106	NA	-0.1945	0.408	-0.2505	0.153	-0.1445	NA	0	0	0	0	0	0	0	0	0
Tb927.11.11580	hypothetical protein, conserved	ZUnknown	497.5	-0.106	NA	-0.1648	0.475	-0.1935	0.29	-0.0875	NA	0	0	0	0	0	0	0	0	0
Tb927.6.1700	hypothetical protein, LIM-type zinc finger	Zinc.finger	302.8	-0.1059	NA	-0.1326	0.65	-0.1287	0.59	-0.0228	NA	0	0	0	0	0	0	0	0	0
Tb927.11.1970	hypothetical protein, conserved	ZUnknown	419.9	-0.1059	NA	-0.0461	0.901	0.0138	0.966	0.1197	NA	0	0	0	0	0	0	0	0	0
Tb927.11.11820	40S ribosomal protein S17	Ribosome	5367.5	-0.1059	0.882	0.04	0.917	0.2136	0.107	0.3196	0.00664	0	0	0	0	0	0	0	0	0
Tb927.4.690	geranylgeranyl transferase type II beta subunit, putative	Prenylation	447	-0.1058	NA	-0.0731	0.827	-0.0341	0.909	0.0717	NA	0	0	0	0	0	0	0	0	0
Tb927.9.3080	hypothetical protein, conserved	ZUnknown	650	-0.1057	0.916	-0.0959	0.729	-0.0748	0.756	0.0309	NA	0	0	0	0	0	0	0	0	0
Tb927.11.16280	60S ribosomal protein L2 L8	Ribosome	9381.6	-0.1057	0.878	0.0414	0.911	0.2173	0.0961	0.323	0.0061	0	0	0	0	0	0	0	0	0
Tb927.2.1380	leucine-rich repeat protein (LRRP)	LRRP	29.9	-0.1056	NA	-0.2355	0.25	-0.2208	0.165	-0.1152	NA	0	0	0	0	0	0	0	0	0
Tb927.11.16040	prefoldin subunit, putative	ZUnknown	599.2	-0.1056	NA	-0.1131	0.667	-0.1046	0.63	0.001	NA	0	0	0	0	0	0	0	0	0
Tb927.11.4870	hypothetical protein, conserved, no clear yeast or human matches, domain of unknown funciton	Mito.pathway	224.8	-0.1055	NA	-0.157	0.584	-0.1591	0.496	-0.0536	NA	0	0	0	0	0	0	0	0	0
Tb927.6.3790	valosin-containing protein homolog, putative,AAA ATPase	Vesicular.transport	1059.5	-0.1055	0.903	-0.1239	0.575	-0.1301	0.48	-0.0247	0.964	0	0	0	0	0	0	0	0	0
Tb927.4.2100	hypothetical protein	ZUnknown	154.5	-0.1055	NA	-0.0913	0.817	-0.0464	0.89	0.0591	NA	0	0	0	0	0	0	0	0	0
Tb927.7.5070	hypothetical protein	ZUnknown	1425.7	-0.1055	0.872	-0.0801	0.724	-0.0525	0.797	0.053	0.881	0	0	0	0	0	0	0	0	0
Tb927.6.1840	Diacylglycerol kinase catalytic domain containing protein, putative	ZUnknown	528.1	-0.1054	NA	-0.0402	0.911	0.0233	0.938	0.1287	NA	0	0	0	0	0	0	0	0	0
Tb927.8.1550	paraflagellar rod protein PFC3	Cytoskeleton	6438	-0.1053	0.859	-0.0692	0.78	-0.0314	0.887	0.0739	0.804	0	0	0	0	0	0	0	0	0
Tb927.7.2700	NADH-cytochrome b5 reductase, putative (B5R)	Mito.e.transport	663.7	-0.1053	0.913	-0.0629	0.836	-0.019	0.949	0.0863	NA	0	0	0	0	0	0	0	0	0
Tb927.10.7870	hypothetical protein, conserved	ZUnknown	444.2	-0.1052	NA	-0.1491	0.537	-0.1653	0.404	-0.0601	NA	0	0	0	0	0	0	0	0	0
Tb927.5.4070	PPL1 priming DNA polymerase	DNA	1144.8	-0.1052	0.89	-0.0867	0.717	-0.0641	0.761	0.0411	0.922	0	0	0	0	0	0	0	0	0
Tb927.3.2740	hypothetical protein, conserved	ZUnknown	886.2	-0.105	0.9	-0.0103	0.98	0.08	0.692	0.185	NA	0	0	0	0	0	0	0	0	0
Tb927.5.1220	hypothetical protein, conserved	ZUnknown	225.9	-0.1049	NA	-0.1912	0.464	-0.2188	0.285	-0.1139	NA	0	0	0	0	0	0	0	0	0
Tb927.10.15130	synaptobrevin-type vesicle transport protein, SLY2 (SEC22)	Vesicular.transport	598.6	-0.1049	NA	-0.1505	0.495	-0.1725	0.334	-0.0677	NA	0	0	0	0	0	0	0	0	0
Tb927.5.3410	Mitchondrial LSU ribosomal protein	Mito.translation	346.9	-0.1049	NA	-0.0994	0.751	-0.0772	0.772	0.0276	NA	0	0	0	0	0	0	0	0	0
Tb927.3.5230	DNA repair protein, putative	DNA	754.5	-0.1049	0.916	-0.0486	0.886	0.0073	0.981	0.1121	NA	0	0	0	0	0	0	0	0	0
Tb927.9.5590	DNA topoisomerase ii (TOP2)	Mito.DNA	3393.5	-0.1048	0.757	-0.1856	0.174	-0.2662	0.00285	-0.1613	0.185	0	0	0	0	0	0	0	0	0
Tb927.11.4040	hypothetical protein, conserved	ZUnknown	649	-0.1048	0.916	-0.1377	0.525	-0.15	0.412	-0.0453	NA	0	0	0	0	0	0	0	0	0
Tb927.1.4490	acetyltransferase, putative	Lipids	887.4	-0.1047	0.903	-0.1497	0.456	-0.177	0.265	-0.0723	NA	0	0	0	0	0	0	0	0	0
Tb927.11.15370	importin beta subunit beta-4 KAP123	Nuclear.transport	5473.9	-0.1047	0.725	0.006	0.987	0.1252	0.275	0.2299	0.0132	0	0	0	0	0	0	0	0	0
Tb927.7.640	hypothetical protein, conserved	Mito.pathway	698.7	-0.1046	0.909	-0.151	0.46	-0.1758	0.286	-0.0712	NA	0	0	0	0	0	0	0	0	0
Tb927.10.11660	hypothetical protein, conserved	ZUnknown	924.7	-0.1044	0.903	-0.0729	0.799	-0.0384	0.881	0.066	0.862	0	0	0	0	0	0	0	0	0
Tb927.7.3920	hypothetical protein, conserved	ZUnknown	874.4	-0.1043	0.9	-0.0736	0.789	-0.0404	0.868	0.0639	NA	0	0	0	0	0	0	0	0	0
Tb927.11.14050	hypothetical protein, conserved	ZUnknown	252.5	-0.1043	NA	-0.0716	0.846	-0.0249	0.943	0.0793	NA	0	0	0	0	0	0	0	0	0
Tb927.4.1130	Complex 1 protein (LYR family), putative	Mito.e.transport	373.2	-0.104	NA	0.017	0.971	0.1343	0.545	0.2383	NA	0	0	0	0	0	0	0	0	0
Tb927.9.7910	hypothetical protein, conserved	ZUnknown	17.4	-0.1039	NA	-0.068	0.818	0.0046	0.987	0.1085	NA	0	0	0	0	0	0	0	0	0
Tb927.7.3690	hypothetical protein, probably a 3'-UTR	ZUnknown	341.5	-0.1038	NA	-0.1919	0.417	-0.2526	0.121	-0.1488	NA	0	0	0	0	0	0	0	0	0
Tb927.11.4260	Protein of unknown function, DUF607, putative	ZUnknown	335.2	-0.1038	NA	-0.1245	0.666	-0.1175	0.619	-0.0136	NA	0	0	0	0	0	0	0	0	0
Tb927.10.5410	hypothetical protein	ZUnknown	236.3	-0.1038	NA	0.0214	0.966	0.1458	0.555	0.2495	NA	0	0	0	0	0	0	0	0	0
Tb927.7.6470	O-sialoglycoprotein endopeptidase, putative	Protease	577	-0.1037	NA	-0.153	0.495	-0.1754	0.339	-0.0717	NA	0	0	0	0	0	0	0	0	0
Tb927.11.8730	ATPase, putative,S. cerevisiae cell division control protein 48 homolog, putative	Enzyme	923.4	-0.1036	0.9	-0.0499	0.869	0.0023	0.994	0.1058	0.695	0	0	0	0	0	0	0	0	0
Tb927.10.4220	hypothetical protein, conserved	ZUnknown	548.4	-0.1035	NA	-0.1627	0.459	-0.1934	0.265	-0.0899	NA	0	0	0	0	0	0	0	0	0
Tb927.3.5010	hypothetical protein, conserved	ZUnknown	1068.9	-0.1035	0.902	-0.0663	0.817	-0.0271	0.914	0.0764	0.822	0	0	0	0	0	0	0	0	0
Tb927.6.4470	prozyme,S-adenosylmethionine decarboxylaseregulator	Redox	1207.5	-0.1034	0.9	-0.1562	0.407	-0.1949	0.175	-0.0916	0.757	0	0	0	0	0	0	0	0	0
Tb927.7.2750	protein kinase, putative	Protein.kinase	597.2	-0.1034	NA	-0.1109	0.658	-0.1033	0.62	0	NA	0	0	0	0	0	0	0	0	0
Tb927.10.15960	hypothetical protein, conserved	ZUnknown	716.6	-0.1034	0.916	-0.06	0.842	-0.0159	0.957	0.0875	NA	0	0	0	0	0	0	0	0	0
Tb927.5.3910	SNAP2 SLRNA trasncription factor component (was SNAP42)	RNA.synthesis	550.1	-0.1033	NA	-0.1343	0.573	-0.1417	0.48	-0.0383	NA	0	0	0	0	0	0	0	0	0
Tb927.10.7050	chromatin assembly factor 1 subunit B, putative	Chromatin	651.8	-0.1033	0.916	-0.1153	0.63	-0.1115	0.584	-0.0082	NA	0	0	0	0	0	0	0	0	0
Tb927.10.13000	cAMP phosphodiesterase A, putative (PDEA)	Signalling	991.8	-0.1032	0.9	-0.1738	0.331	-0.2268	0.0924	-0.1236	0.59	0	0	0	0	0	0	0	0	0
Tb927.7.5360	Haemolysin-III related, putative	ZUnknown	408.4	-0.1032	NA	-0.1017	0.73	-0.083	0.742	0.0201	NA	0	0	0	0	0	0	0	0	0
Tb927.11.14160	Alpha/beta hydrolase family, putative	ZUnknown	579.7	-0.1031	NA	-0.093	0.733	-0.0729	0.761	0.0302	NA	0	0	0	0	0	0	0	0	0
Tb927.4.970	hypothetical protein, conserved, no clear yeast or human matches	ZUnknown	238.6	-0.1031	NA	0.032	0.942	0.1628	0.478	0.2659	NA	0	0	0	0	0	0	0	0	0
Tb927.11.2770	hypothetical protein, conserved	ZUnknown	708	-0.103	0.919	-0.1732	0.399	-0.2192	0.164	-0.1162	NA	0	0	0	0	0	0	0	0	0
Tb927.11.16200	microtubule-associated protein,corset-associated protein 17 (CAP17)	Cytoskeleton	187.3	-0.103	NA	-0.1593	0.61	-0.1665	0.487	-0.0635	NA	0	0	0	0	0	0	0	0	0
Tb927.8.5550	hypothetical protein, conserved, kineto-specific	ZUnknown	183.2	-0.103	NA	-0.1159	0.738	-0.0949	0.737	0.008	NA	0	0	0	0	0	0	0	0	0
Tb927.9.11880	Mitchondrial SSU ribosomal protein	Mito.translation	756.6	-0.103	0.916	-0.1094	0.65	-0.1042	0.607	-0.0011	NA	0	0	0	0	0	0	0	0	0
Tb927.6.610	hypothetical protein, conserved	ZUnknown	693	-0.1029	0.916	-0.1461	0.49	-0.1689	0.323	-0.0661	NA	0	0	0	0	0	0	0	0	0
Tb927.11.2710	cell division cycle 45 (CDC45), putative	Cell.cycle	877.7	-0.1028	0.911	-0.1063	0.66	-0.0996	0.619	0.0032	NA	0	0	0	0	0	0	0	0	0
Tb927.8.900	splicing factor TSR1 (TSR1)	RNA.processing	1186.9	-0.1025	0.9	-0.0851	0.736	-0.0632	0.772	0.0393	0.926	0	0	0	0	0	0	0	0	0
Tb927.3.3440	phytanoyl-CoA dioxygenase (PhyH), putative	ZUnknown	540.8	-0.1024	NA	-0.1284	0.593	-0.1324	0.515	-0.03	NA	0	0	0	0	0	0	0	0	0
Tb927.8.5780	phosphatase, putative	Phosphatase	789.4	-0.1022	0.918	-0.1773	0.38	-0.2297	0.126	-0.1275	NA	0	0	0	0	0	0	0	0	0
Tb927.3.4900	tRNA isopentenyltransferase, putative	rRNA.tRNA.process	589.5	-0.1022	NA	-0.1517	0.528	-0.1748	0.366	-0.0727	NA	0	0	0	0	0	0	0	0	0
Tb927.3.3340	3', 5'-cyclic nucleotide phosphodiesterase, putative (PDED)	Lipids	667	-0.1022	0.919	-0.1058	0.673	-0.0978	0.642	0.0044	NA	0	0	0	0	0	0	0	0	0
Tb927.10.5220	hypothetical protein, possible component of cytochorome oxidase complex	Mito.e.transport	385.9	-0.1022	NA	-0.0919	0.771	-0.066	0.812	0.0362	NA	0	0	0	0	0	0	0	0	0
Tb927.10.12630	hypothetical protein, conserved	ZUnknown	412.1	-0.1021	NA	-0.0747	0.822	-0.0383	0.897	0.0639	NA	0	0	0	0	0	0	0	0	0
Tb927.9.1660	hypothetical protein, conserved	ZUnknown	377.4	-0.1021	NA	-0.0153	0.972	0.0671	0.808	0.1692	NA	0	0	0	0	0	0	0	0	0
Tb927.9.5440	actin, putative	Cytoskeleton	884.7	-0.102	0.903	-0.1009	0.662	-0.0904	0.643	0.0115	NA	0	0	0	0	0	0	0	0	0
Tb927.4.1540	POMP27, NAD-dependent epimerase, aldehyde reductase, one putative TM domain	Mito.membrane	1702.9	-0.102	0.9	-0.0927	0.705	-0.0781	0.693	0.0239	0.963	0	0	0	0	0	0	0	0	0
Tb927.10.5230	ARL13b	Vesicular.transport	722.1	-0.102	0.916	-0.0652	0.823	-0.0263	0.922	0.0756	NA	0	0	0	0	0	0	0	0	0
Tb927.11.16630	major facilitator superfamily, putative	ZUnknown	1416.5	-0.1019	0.9	-0.1151	0.585	-0.1199	0.494	-0.018	0.979	0	0	0	0	0	0	0	0	0
Tb927.11.16450	hypothetical protein, conserved	ZUnknown	342.9	-0.1019	NA	-0.0413	0.924	0.0224	0.949	0.1243	NA	0	0	0	0	0	0	0	0	0
Tb927.11.15080	Transmembrane proteins 14C, putative	ZUnknown	366.7	-0.1019	NA	-0.0317	0.938	0.0366	0.906	0.1385	NA	0	0	0	0	0	0	0	0	0
Tb927.8.7710	hypothetical protein, conserved	ZUnknown	255.9	-0.1018	NA	-0.1091	0.744	-0.0905	0.74	0.0113	NA	0	0	0	0	0	0	0	0	0
Tb927.9.9820	glyceraldehyde-3-phosphate dehydrogenase, putative	Glucose.glycerol	934.7	-0.1018	0.9	-0.1001	0.658	-0.0902	0.636	0.0116	0.994	0	0	0	0	0	0	0	0	0
Tb927.7.4010	hypothetical protein, conserved	ZUnknown	128.9	-0.1017	NA	-0.0961	0.811	-0.0574	0.858	0.0443	NA	0	0	0	0	0	0	0	0	0
Tb927.10.7780	KFR1 protein kinase	Protein.kinase	527.9	-0.1016	NA	-0.1917	0.368	-0.2506	0.116	-0.149	NA	0	0	0	0	0	0	0	0	0
Tb927.5.3400	calcium-translocating P-type ATPase, calcium pump	Ions	6252.9	-0.1016	0.823	0.0098	0.98	0.1321	0.304	0.2337	0.0286	0	0	0	0	0	0	0	0	0
Tb927.11.12020	hypothetical protein, conserved	ZUnknown	382.4	-0.1015	NA	-0.1334	0.627	-0.1345	0.548	-0.0329	NA	0	0	0	0	0	0	0	0	0
Tb927.11.2990	KREPB4	Mito.RNA	537.9	-0.1015	NA	-0.0451	0.896	0.0104	0.974	0.1119	NA	0	0	0	0	0	0	0	0	0
Tb927.4.4700	hypothetical protein, conserved	ZUnknown	1946.5	-0.1014	0.87	-0.1055	0.559	-0.1041	0.501	-0.0027	0.998	0	0	0	0	0	0	0	0	0
Tb927.5.1550	mitochondrial carrier protein, MCP23	Mito.transport	926.8	-0.1014	0.908	-0.096	0.698	-0.0827	0.685	0.0186	0.979	0	0	0	0	0	0	0	0	0
Tb927.9.1950	hypothetical protein, conserved	Mito.pathway	768.2	-0.1012	0.92	-0.1077	0.668	-0.1011	0.624	0.0001	NA	0	0	0	0	0	0	0	0	0
Tb927.11.15200	hypothetical protein, conserved	ZUnknown	139.5	-0.1011	NA	-0.1117	0.763	-0.0852	0.775	0.016	NA	0	0	0	0	0	0	0	0	0
Tb927.10.7000	hypothetical protein, conserved	ZUnknown	406.8	-0.1009	NA	-0.1835	0.453	-0.2293	0.212	-0.1283	NA	0	0	0	0	0	0	0	0	0
Tb927.3.5620	FACT complex subunit SPT16	RNA.synthesis	4170.4	-0.1009	0.795	-0.0544	0.815	-0.008	0.97	0.0929	0.632	0	0	0	0	0	0	0	0	0
Tb927.9.7900	hypothetical protein, conserved, predicted GPI anchor	Membrane.protein	81	-0.1008	NA	-0.0969	0.811	-0.0453	0.89	0.0555	NA	0	0	0	0	0	0	0	0	0
Tb927.8.3970	oxidoreductase, putative	Enzyme	851.7	-0.1008	0.905	-0.0049	0.989	0.0881	0.657	0.1889	NA	0	0	0	0	0	0	0	0	0
Tb927.8.3370	Ran guanine nucleotide release factor homologue	Nuclear.transport	244.2	-0.1007	NA	-0.1774	0.497	-0.2026	0.329	-0.1019	NA	0	0	0	0	0	0	0	0	0
Tb927.11.2360	phenylalanyl-tRNA synthetase (beta subunit), putative	Translation.tRNA	2764.7	-0.1006	0.842	-0.1348	0.376	-0.1627	0.17	-0.0621	0.821	0	0	0	0	0	0	0	0	0
Tb927.8.1270	NOP54	Cell.cycle	1094.1	-0.1003	0.9	-0.0342	0.917	0.03	0.901	0.1302	0.542	0	0	0	0	0	0	0	0	0
Tb927.7.210	proline dehydrogenase	Mito.pathway	786.5	-0.1002	0.925	-0.2358	0.219	-0.3608	0.00493	-0.2605	NA	0	0	0	0	0	0	0	0	0
[truncated: 6,007 more rows]
